# Supplementary material for: ENCORE: Software for Quantitative Ensemble Comparison
Source: PLOS journal article supplement (doi:10.1371/journal.pcbi.1004415), 2015-10-27
Supplement: S1 (10.1371/journal.pcbi.1004415.s001) [file journal.pcbi.1004415.s001]

---

# ENCORE Documentation

*Release 1.0*

June 01, 2015



## CONTENTS

|          |                                                |           |
|----------|------------------------------------------------|-----------|
| <b>1</b> | <b>Introduction</b>                            | <b>1</b>  |
| <b>2</b> | <b>encore package</b>                          | <b>3</b>  |
| 2.1      | Submodules                                     | 3         |
| 2.2      | encore.Ensemble module                         | 3         |
| 2.3      | encore.confdistmatrix module                   | 4         |
| 2.4      | encore.covariance module                       | 5         |
| 2.5      | encore.similarity module                       | 6         |
| 2.6      | encore.utils module                            | 11        |
| <b>3</b> | <b>encore.clustering package</b>               | <b>15</b> |
| 3.1      | Submodules                                     | 15        |
| 3.2      | encore.clustering.Cluster module               | 15        |
| 3.3      | encore.clustering.affinityprop module          | 16        |
| <b>4</b> | <b>encore.dimensionality_reduction package</b> | <b>17</b> |
| 4.1      | Module contents                                | 17        |
|          | <b>Python Module Index</b>                     | <b>19</b> |
|          | <b>Index</b>                                   | <b>21</b> |



## INTRODUCTION

ENCORE is a Python package designed to quantify the similarity between conformational ensembles of proteins (or in principle other macromolecules), using three different methods originally described in:

Kresten Lindorff-Larsen, Jesper Ferkinghoff-Borg (2009)  
Similarity Measures for Protein Ensembles.  
PLoS ONE 4(1): e4203. doi:10.1371/journal.pone.0004203

A description of ENCORE and a number of application can be found in:

Matteo Tiberti, Elena Papaleo, Tone Bengtsen, Wouter Boomsma and  
Kresten Lindorff-Larsen,  
ENCORE: Software for quantitative ensemble comparison  
Submitted

The package includes facilities for handling ensembles and trajectories, performing clustering or dimensionality reduction of the ensemble space, estimating multivariate probability distributions from the input data, and more. ENCORE can be used to compare experimental and simulation-derived ensembles, as well as estimate the convergence of trajectories from time-dependent simulations. The package was designed as a Python 2.6 (or any higher 2.X version) library. The user may also use some of the library files as scripts that accept command line arguments. Usually, the help text included for each script (obtained running “python encore/script.py -h”) is self-explanatory. Examples are also available on how ENCORE may be used to calculate the similarity measures on a number of ensembles.

The similarity measures implemented in ENCORE are based on three different methods, which all rely on the following idea: Given two or more conformational ensembles of the same topology (i.e. structure), we view the particular set of conformations from each ensemble as a sample from an underlying, but unknown, probability distribution. We use this sample to model the probability density function of said distribution. Then we compare the modeled distributions using standard measures of the similarity between two probability densities, such as the Jensen-Shannon divergence.

In the ENCORE package, we have implemented three methods to estimate the density:

- Harmonic ensembles similarity (HES): we assume that each ensemble is derived from a multivariate normal distribution. We, thus, estimate the parameters for the distribution of each ensemble (mean and covariance matrix) and compare them using a symmetrized version of the Kullback-Leibler divergence. For each ensemble, the mean conformation is estimated as the average over the ensemble, and the covariance matrix is calculated by default using a shrinkage estimate method (or by a maximum-likelihood method, optionally).
- Clustering-based similarity (CES): We use the affinity propagation method for clustering to partition the whole space of conformations in to clusters of structures. After the structures are clustered we take the population of each ensemble in each cluster as a probability distribution of conformations. We then compare the obtained probability distribution using the Jensen-Shannon divergence measure between probability distributions.
- Dimensionality reduction-based similarity (DRES): We use a gaussian kernel-based density estimation method to estimate the probability density, and use that as probability function in order to compare different ensembles. Before doing that, however, due to the limited size of the sample, it is necessary to reduce the dimensionality

of the input space. Thus, the method first projects the ensembles into lower dimensions by using the Stochastic Proximity Embedding algorithm.

ENCORE is able to use, as input data, structural ensembles deriving both from molecular simulations (e.g. molecular dynamics or Monte Carlo methods) or experimental structural ensembles (e.g. NMR structures as PDB files). The software is able to handle the most popular trajectory formats (files such as DCD, XTC, TRR, XYZ, TRJ, MDCRD), although periodic boundaries conditions must be removed before use. A topology file is also required.

Together with the software, we also provide three examples that showcase three typical cases of study:

- comparing simulation trajectories with other trajectories
- estimating convergence of trajectories from molecular dynamics simulations
- comparing experimentally-derived ensembles from the PDB

See the examples themselves for more information. If you use ENCORE for your scientific work, please cite:

Matteo Tiberti, Elena Papaleo, Tone Bengtsen, Wouter Boomsma  
and Kresten Lindorff-Larsen,  
ENCORE: Software for quantitative ensemble comparison  
Submitted

## ENCORE PACKAGE

## 2.1 Submodules

## 2.2 `encore.Ensemble` module

### 2.2.1 Ensemble representation — `MDAnalysis.analysis.ensemble.ensemble`

This module contains the `Ensemble` class allowing for easy reading in and alignment of the ensemble contained in one or more trajectory files. Trajectory files can be specified in several formats, including the popular xtc and dcd, as well as experimental multiple-conformation pdb files, i.e. those coming from NMR structure resolution experiments.

```
class encore.Ensemble.Ensemble (universe=None, topology=None, trajectory=None,  
                                atom_selection_string='(name CA)', superimposition_selection_string=None, frame_interval=1)
```

`Ensemble` class designed to easily manage more than one trajectory files. Users can provide either a topology/trajectory(es) combination or a `MDAnalysis.Universe` object. Topology and trajectory files must have the same number of atoms, and order is of course important.

While creating a new `Ensemble` object it is possible to load from a trajectory a selected subset of atoms, using the `MDAnalysis` syntax for selections (see [http://mdanalysis.googlecode.com/git/package/doc/html/documentation\\_pages/selections.html](http://mdanalysis.googlecode.com/git/package/doc/html/documentation_pages/selections.html) for details) and the `atom_selection_string` argument. By default all the alpha carbons (“CA”) are considered. It is also possible to load a lower number of frames for each trajectory, by selecting only one frame every `frame_interval` (e.g. with `frame_interval=2` only every second frame will be loaded).

Frames in an `Ensemble` object can be superimposed to a reference conformation (see method `align`). By default the rotation matrix for this superimposition is calculated on all the atoms of the system, as defined by the `atom_selection_string`. However, if the `superimposition_selection_string` is provided, that subset will be used to calculate the rotation matrix, which will be applied on the whole `atom_selection_string`. Notice that the set defined by `superimposition_selection_string` is completely independent from the `atom_selection_string` atoms, as it can be a subset or superset of that, although it must refer to the same topology.

#### Attributes

**`topology_filename`** [str] Topology file name.

**`trajectory_filename`** [str] Trajectory file name. If more than one are specified, it is a list of comma-separated names (e.g. “`traj1.xtc,traj2.xtc`”)

**`universe`** [`MDAnalysis.Universe`] Universe object containing the original trajectory(es) and all the atoms in the topology.

**`frame_interval`** [int] Keep only one frame every `frame_interval` (see the package or module description)

**atom\_selection\_string** [str] Atom selection string in the MDAnalysis format (see [http://mdanalysis.googlecode.com/git/package/doc/html/documentation\\_pages/selections.html](http://mdanalysis.googlecode.com/git/package/doc/html/documentation_pages/selections.html))

**atom\_selection** [MDAnalysis.core.AtomGroup] MDAnalysis atom selection, which corresponds to the selection defined by atom\_selection\_string on universe

**coordinates** [(x,N,3) numpy.array] Array of coordinate which will be used in the calculations, where x is the number of frames and N is the number of atoms. Notice that these coordinates may be different from those of universe, because of the atom\_selection and frame\_interval.

**superimposition\_selection\_string** [str] Analogous to atom\_selection\_string, but related to the subset of atoms that will be used for 3D superimposition.

**superimposition\_selection** [MDAnalysis.core.AtomGroup] Analogous to atom\_selection, but related to the subset of atoms that will be used for 3D superimposition.

**superimposition\_coordinates** [(x,N,3) numpy.array] Analogous to coordinates, but related to the subset of atoms that will be used for 3D superimposition.

**align** (*reference=None, weighted=True*)

Least-square superimposition of the Ensemble coordinates to a reference structure.

**Arguments:**

**reference** [None or MDAnalysis.Universe] Reference structure on which those belonging to the Ensemble will be fitted upon. It must have the same topology as the Ensemble topology. If reference is None, the structure in the first frame of the ensemble will be used as reference.

**weighted** [bool] Whether to perform weighted superimposition or not

**get\_coordinates** (*subset\_selection\_string=None*)

Get a set of coordinates from Universe.

**Arguments:**

**subset\_selection\_string** [None or str] Selection string that selects the universe atoms whose coordinates have to be returned. The frame\_interval will be automatically applied. If the argument is None, the atoms defined in the atom\_selection\_string will be considered.

**Returns:**

**coordinates** [(x,N,3) numpy array] The requested array of coordinates.

## 2.3 encore.confdistmatrix module

### 2.3.1 Distance Matrix calculation — MDAnalysis.analysis.ensemble.confdistmatrix

The module contains a base class to easily compute, using parallelization and shared memory, matrices of conformational distance between the structures stored in an Ensemble. A class to compute an RMSD matrix in such a way is also available.

**class** `encore.confdistmatrix.ConformationalDistanceMatrixGenerator`

Base class for conformational distance matrices generator between array of coordinates. Work for single matrix elements is performed by the private `_simple_worker` and `_fitter_worker` methods, which respectively do or don't perform pairwise alignment before calculating the distance metric. The class efficiently and automatically spans work over a prescribed number of cores, while keeping both input coordinates and the output matrix as shared memory. If logging level is low enough, a progress bar of the whole process is printed out. This class acts as a functor.



**run** (*ensemble*, *ncores=None*, *pairwise\_align=False*, *align\_subset\_coordinates=None*, *mass\_weighted=True*, *metadata=True*)  
Run the conformational distance matrix calculation.

**Arguments:**

**ensemble** [encore.Ensemble.Ensemble object] Ensemble object for which the conformational distance matrix will be computed.

**pairwise\_align** [bool] Whether to perform pairwise alignment between conformations

**align\_subset\_coordinates** [numpy.array or None] Use these coordinates for superimposition instead of those from `ensemble.superimposition_coordinates`

**mass\_weighted** [bool] Whether to perform mass-weighted superimposition and metric calculation

**metadata** [bool] Whether to build a metadata dataset for the calculated matrix

**ncores** [int] Number of cores to be used for parallel calculation

**Returns:**

**cond\_dist\_matrix** [encore.utils.TriangularMatrix object] Conformational distance matrix in triangular representation.

**class** `encore.confdistmatrix.MinusRMSDMatrixGenerator`

Bases: `encore.confdistmatrix.ConformationalDistanceMatrixGenerator`

-RMSD Matrix calculator. See `encore.confdistmatrix.RMSDMatrixGenerator` for details.

**class** `encore.confdistmatrix.RMSDMatrixGenerator`

Bases: `encore.confdistmatrix.ConformationalDistanceMatrixGenerator`

RMSD Matrix calculator. Simple workers doesn't perform fitting, while fitter worker does.

## 2.4 encore.covariance module

### 2.4.1 Covariance calculation — `encore.covariance`

The module contains functions to estimate the covariance matrix of an ensemble of structures.

**class** `encore.covariance.EstimatorML`

Standard maximum likelihood estimator of the covariance matrix. The generated object acts as a functor.

**calculate** (*coordinates*, *reference\_coordinates=None*)

**Arguments:**

**coordinates** [numpy.array] Flattened array of coordinates

**reference\_coordinates** [numpy.array] Optional reference to use instead of mean

**Returns:**

**cov\_mat** [numpy.array] Estimate of covariance matrix

**class** `encore.covariance.EstimatorShrinkage` (*shrinkage\_parameter=None*)

Shrinkage estimator of the covariance matrix using the method described in

Improved Estimation of the Covariance Matrix of Stock Returns With an Application to Portfolio Selection.  
Ledoit, O.; Wolf, M., Journal of Empirical Finance, 10, 5, 2003

This implementation is based on the matlab code made available by Olivier Ledoit on his website:

[http://www.ledoit.net/ole2\\_abstract.htm](http://www.ledoit.net/ole2_abstract.htm)

The generated object acts as a functor.

**calculate** (*coordinates*, *reference\_coordinates=None*)

**Arguments:**

*coordinates* [numpy.array] Flattened array of coordinates

*reference\_coordinates*: **numpy.array** Optional reference to use instead of mean

**Returns:**

*cov\_mat* [numpy.array] Covariance matrix

`encore.covariance.covariance_matrix` (*ensemble*, *estimator*=<*encore.covariance.EstimatorShrinkage*  
instance>, *mass\_weighted=True*, *reference=None*,  
*start=0*, *end=None*)

Calculates (optionally mass weighted) covariance matrix

**Arguments:**

*ensemble* [Ensemble object] The structural ensemble

*estimator* [MLEstimator or ShrinkageEstimator object] Which estimator type to use (maximum likelihood, shrinkage). This object is required to have a `__call__` function defined.

*mass\_weighted* [bool] Whether to do a mass-weighted analysis

*reference* [MDAnalysis.Universe object] Use the distances to a specific reference structure rather than the distance to the mean.

**Returns:**

*cov\_mat* [numpy.array] Covariance matrix

## 2.5 encore.similarity module

### 2.5.1 Ensemble similarity calculations — `encore.similarity`

The module contains implementations of similarity measures between protein ensembles described in:

Similarity Measures for Protein Ensembles. Lindorff-Larsen, K.; Ferkinghoff-Borg, J. PLoS ONE 2009, 4, e4203.

`encore.similarity.bootstrap_coordinates` (*coords*, *times*)

Bootstrap conformations in a `encore.Ensemble`. This means drawing from the `encore.Ensemble.coordinates` numpy array with replacement “times” times and returning the outcome.

**Arguments:**

*coords* [numpy.array] 3-dimensional coordinates array

*times* [int] number of times the coordinates will be bootstrapped

**Returns:**

*out* [list] Bootstrapped coordinates list. `len(out) = times`.

`encore.similarity.bootstrap_matrix` (*matrix*)

Bootstrap an input square matrix. The resulting matrix will have the same shape as the original one, but the order of its elements will be drawn (with repetition). Separately bootstraps each ensemble.

**Arguments:**

*matrix* [encore.utils.TriangularMatrix] similarity/dissimilarity matrix

**Returns:**

*this\_m* [encore.utils.TriangularMatrix] bootstrapped similarity/dissimilarity matrix

`encore.similarity.clustering_ensemble_similarity(cc, ens1, ens1_id, ens2, ens2_id)`

Clustering ensemble similarity: calculate the probability densities from the clusters and calculate discrete Jensen-Shannon divergence.

**Arguments:**

*cc* [encore.ClustersCollection] Collection from cluster calculated by a clustering algorithm (e.g. Affinity propagation)

*ens1* [encore.Ensemble] First ensemble to be used in comparison

*ens2* [encore.Ensemble] Second ensemble to be used in comparison

*ens1\_id* [int] First ensemble id as detailed in the ClustersCollection metadata

*ens2\_id* [int] Second ensemble id as detailed in the ClustersCollection metadata

**Returns:**

*djs* [float] Jensen-Shannon divergence between the two ensembles, as calculated by the clustering ensemble similarity method

`encore.similarity.cumulative_clustering_ensemble_similarity(cc, ens1, ens1_id, ens2, ens2_id, ens1_id_min=1, ens2_id_min=1)`

Calculate clustering ensemble similarity between joined ensembles. This means that, after clustering has been performed, some ensembles are merged and the dJS is calculated between the probability distributions of the two clusters groups. In particular, the two ensemble groups are defined by their ensembles id: one of the two joined ensembles will comprise all the ensembles with id [ens1\_id\_min, ens1\_id], and the other ensembles will comprise all the ensembles with id [ens2\_id\_min, ens2\_id].

**Arguments:**

*cc* [encore.ClustersCollection] Collection from cluster calculated by a clustering algorithm (e.g. Affinity propagation)

*ens1* [encore.Ensemble] First ensemble to be used in comparison

*ens2* [encore.Ensemble] Second ensemble to be used in comparison

*ens1\_id* [int] First ensemble id as detailed in the ClustersCollection metadata

*ens2\_id* [int] Second ensemble id as detailed in the ClustersCollection metadata

**Returns:**

*djs* [float] Jensen-Shannon divergence between the two ensembles, as calculated by the clustering ensemble similarity method

`encore.similarity.cumulative_gen_kde_pdfs(embedded_space, ensemble_assignment, nensembles, nsamples=None, ens_id_min=1, ens_id_max=None)`

Generate Kernel Density Estimates (KDE) from embedded spaces and elaborate the coordinates for later use. However, consider more than one ensemble as the space on which the KDE will be generated. In particular, will use ensembles with ID [ens\_id\_min, ens\_id\_max].

**Arguments:**

**embedded\_space** [numpy.array] Array containing the coordinates of the embedded space

**ensemble\_assignment** [numpy.array] array containing one int per ensemble conformation. These allow to distinguish, in the complete embedded space, which conformations belong to each ensemble. For instance if ensemble\_assignment is [1,1,1,1,2,2], it means that the first four conformations belong to ensemble 1 and the last two to ensemble 2

**nesensembles** [int] Number of ensembles

**nsamples** [int] Samples to be drawn from the ensembles. Will be required in a later stage in order to calculate dJS.

**ens\_id\_min** [int] Minimum ID of the ensemble to be considered; see description

**ens\_id\_max** [int] Maximum ID of the ensemble to be considered; see description

#### Returns:

**kdes** [scipy.stats.gaussian\_kde] KDEs calculated from ensembles

**resamples** [list of numpy.array] For each KDE, draw samples according to the probability distribution of the kde mixture model

**embedded\_ensembles** [list of numpy.array] List of numpy.array containing, each one, the elements of the embedded space belonging to a certain ensemble

```
encore.similarity.dimred_ensemble_similarity(kde1, resamples1, kde2, re-
                                             samples2, ln_P1_exp_P1=None,
                                             ln_P2_exp_P2=None,
                                             ln_P1P2_exp_P1=None,
                                             ln_P1P2_exp_P2=None)
```

Calculate the Jensen-Shannon divergence according the the Dimensionality reduction method. In this case, we have continuous probability densities we have to integrate over the measureable space. Our target is calculating Kullback-Liebler, which is defined as:

$$D_{KL}(P(x)||Q(x)) = \int_{-\infty}^{\infty} P(x_i) \ln(P(x_i)/Q(x_i)) = \langle \ln(P(x)) \rangle_P - \langle \ln(Q(x)) \rangle_P$$

where the  $\langle . \rangle_P$  denotes an expectation calculated under the distribution P. We can, thus, just estimate the expectation values of the components to get an estimate of dKL. Since the Jensen-Shannon distance is actually more complex, we need to estimate four expectation values:

$$\begin{aligned} &\langle \log(P(x)) \rangle_P \\ &\langle \log(Q(x)) \rangle_Q \\ &\langle \log(0.5 * (P(x) + Q(x))) \rangle_P \\ &\langle \log(0.5 * (P(x) + Q(x))) \rangle_Q \end{aligned}$$

#### Arguments:

**kde1** [scipy.stats.gaussian\_kde] Kernel density estimation for ensemble 1

**resamples1** [numpy.array] Samples drawn according do kde1. Will be used as samples to calculate the expected values according to 'P' as detailed before.

**kde2** [scipy.stats.gaussian\_kde] Kernel density estimation for ensemble 2

**resamples2** [numpy.array] Samples drawn according do kde2. Will be used as sample to calculate the expected values according to 'Q' as detailed before.

**ln\_P1\_exp\_P1** [float or None] Use this value for  $\langle \log(P(x)) \rangle_P$ ; if None, calculate it instead

**ln\_P2\_exp\_P2** [float or None] Use this value for  $\langle \log(Q(x)) \rangle_Q$ ; if None, calculate it instead

***ln\_PIP2\_exp\_P1*** [float or None] Use this value for  $\langle \log(0.5 * (P(x) + Q(x))) \rangle_P$ ; if None, calculate it instead

***ln\_PIP2\_exp\_Q1*** [float or None] Use this value for  $\langle \log(0.5 * (P(x) + Q(x))) \rangle_Q$ ; if None, calculate it instead

**Returns:**

***djs*** [float] Jensen-Shannon divergence calculated according to the dimensionality reduction method

`encore.similarity.discrete_jensen_shannon_divergence` (*pA*, *pB*)

Jensen-Shannon divergence between discrete probability distributions.

**Arguments:**

***pA*** [iterable of floats] First discrete probability density function

***pB*** [iterable of floats] Second discrete probability density function

**Returns:**

***djs*** [float] Discrete Jensen-Shannon divergence

`encore.similarity.discrete_kullback_leibler_divergence` (*pA*, *pB*)

Kullback-Leibler divergence between discrete probability distribution. Notice that since this measure is not symmetric  $d_{KL}(p_A, p_B) \neq d_{KL}(p_B, p_A)$

**Arguments:**

***pA*** [iterable of floats] First discrete probability density function

***pB*** [iterable of floats] Second discrete probability density function

**Returns:**

***dkl*** [float] Discrete Kullback-Liebler divergence

`encore.similarity.gen_kde_pdfs` (*embedded\_space*, *ensemble\_assignment*, *nensembles*, *nsamples*, *ples=None*, *\*\*kwargs*)

Generate Kernel Density Estimates (KDE) from embedded spaces and elaborate the coordinates for later use.

**Arguments:**

***embedded\_space*** [numpy.array] Array containing the coordinates of the embedded space

***ensemble\_assignment*** [numpy.array] Array containing one int per ensemble conformation. These allow to distinguish, in the complete embedded space, which conformations belong to each ensemble. For instance if *ensemble\_assignment* is [1,1,1,1,2,2], it means that the first four conformations belong to ensemble 1 and the last two to ensemble 2

***nensembles*** [int] Number of ensembles

***nsamples*** : int samples to be drawn from the ensembles. Will be required in a later stage in order to calculate dJS.

**Returns:**

***kdes*** [scipy.stats.gaussian\_kde] KDEs calculated from ensembles

***resamples*** [list of numpy.array] For each KDE, draw samples according to the probability distribution of the KDE mixture model

***embedded\_ensembles*** [list of numpy.array] List of numpy.array containing, each one, the elements of the embedded space belonging to a certain ensemble

```
encore.similarity.harmonic_ensemble_similarity(ensemble1=None, ensemble2=None,
                                              sigma1=None, sigma2=None, x1=None,
                                              x2=None, mass_weighted=True, covari-
                                              ance_estimator=<encore.covariance.EstimatorShrinkage
                                              instance>)
```

Calculate the harmonic ensemble similarity measure as defined in

Similarity Measures for Protein Ensembles. Lindorff-Larsen, K.; Ferkinghoff-Borg, J. PLoS ONE 2009, 4, e4203.

#### Arguments:

**ensemble1** [encore.Ensemble or None] First ensemble to be compared. If this is None, sigma1 and x1 must be provided.

**ensemble2** [encore.Ensemble or None] Second ensemble to be compared. If this is None, sigma2 and x2 must be provided.

**sigma1** [numpy.array] Covariance matrix for the first ensemble. If this None, calculate it from ensemble1 using covariance\_estimator

**sigma2** [numpy.array] Covariance matrix for the second ensemble. If this None, calculate it from ensemble1 using covariance\_estimator

**x1: numpy.array** Mean for the estimated normal multivariate distribution of the first ensemble. If this is None, calculate it from ensemble1

**x2: numpy.array** Mean for the estimated normal multivariate distribution of the first ensemble.. If this is None, calculate it from ensemble2

**mass\_weighted** [bool] Whether to perform mass-weighted covariance matrix estimation

**covariance\_estimator** [either EstimatorShrinkage or EstimatorML objects] Which covariance estimator to use

#### Returns:

**dhes** [float] harmonic similarity measure

```
encore.similarity.write_output(matrix, base_fname=None, header='', suffix='', extension='dat')
```

Write output matrix with a nice format, to stdout and optionally a file.

#### Arguments:

**matrix** [encore.utils.TriangularMatrix] Matrix containing the values to be printed

**base\_fname** [str] Basic filename for output. If None, no files will be written, and the matrix will be just printed on screen

**header** [str] Line to be written just before the matrix

**suffix** [str] String to be concatenated to basename, in order to get the final file name

**extension** [str] Extension for the output file

```
encore.similarity.write_output_line(value, fhandler=None, suffix='', label='win.', number=0, rawline=None)
```

Write a line of data with a fixed format to standard output and optionally file. The line will be appended or written to a file object.

The format is (in the Python str.format specification language): '{s}{:d} {:.3f}', with the first element being the label, the second being a number that identifies the data point, and the third being the number itself. For instance:

win.3 0.278

**Arguments:**

**value** [float] Value to be printed.

**fhandler** [file object] File object in which the line will be written. if None, nothing will be written to file, and the value will be just printed on screen

**label** [str] Label to be written before the data

**number** [int ] Number that identifies the data being written in this line.

**rawline** [str] If rawline is not None, write rawline to fhandler instead of the formatted number line. rawline can be any arbitrary string.

## 2.6 encore.utils module

```
class encore.utils.AllowUnrecognizedOptionParser (usage=None, option_list=None, option_class=<class optparse.Option>, version=None, conflict_handler='error', description=None, formatter=None, add_help_option=True, prog=None, epilog=None)
```

Bases: `optparse.OptionParser`

Parser allowing unknown options. Note that only `AmbiguousOptionError` is caught, meaning that unexpected arguments to known options still give rise to an error.

```
class encore.utils.AnimatedProgressBar (*args, **kwargs)
```

Bases: `encore.utils.ProgressBar`

Extends `ProgressBar` to allow you to use it straightforward on a script. Accepts an extra keyword argument named `stdout` (by default use `sys.stdout`). The progress status may be send to any file-object.

**show\_progress()**

```
class encore.utils.OptionGroup (parser, title, description=None)
```

Bases: `optparse.OptionGroup`

A wrapper for a group of options. Stores the args and kwargs options used to create options within the group, so that duplicates can be made

**add\_option** (\*args, \*\*kwargs)

**duplicate** (index)

Make a copy of the entire group. Any occurrence of “%(index)s” within any of the arguments will be replaced by the provided index

```
class encore.utils.OptionGroups
```

Wrapper for the creation of new groups, making it possible to reuse `OptionGroup` definitions in different parsers (which is normally not possible since they are bound to a specific parser.

**add\_group** (title)

```
class encore.utils.ParallelCalculation (ncores,function,args=[],kwargs=None)
```

Generic parallel calculation class. Can use arbitrary functions, arguments to functions and kwargs to functions.

**Attributes:**

**ncores** [int ] Number of cores to be used for parallel calculation





**class** `encore.utils.Tee(*files)`

Simple class that writes to one or more file objects.

**Attributes:**

**files** [list of file objects] File objects to be written to.

**write** (*obj*)

Write string obj to all the file objects.

**Arguments:**

**obj** [str] String to write to the file objects.

**class** `encore.utils.TriangularMatrix(size, metadata=None, loadfile=None)`

Triangular matrix class. This class is designed to provide a memory-efficient representation of a triangular matrix that still behaves as a square symmetric one. The class wraps a `numpy.array` object, in which data are memorized in row-major order. It also has few additional facilities to conveniently load/write a matrix from/to file. It can be accessed using the `[]` and `()` operators, similarly to a normal `numpy` array.

**Attributes:**

**size** [int] Size of the matrix (number of rows or number of columns)

**metadata** [dict] Metadata for the matrix (date of creation, name of author ...)

**loadz** (*fname*)

Load matrix from the npz compressed `numpy` format.

**Arguments:**

**fname** : str Name of the file to be loaded.

**savez** (*fname*)

Save matrix in the npz compressed `numpy` format. Save metadata and data as well.

**Arguments:**

**fname** : str Name of the file to be saved.

**square\_print** (*fname=None, header=None, label='ens.', justification=10*)

Print the triangular matrix as a symmetrical square matrix. Also supports printing to a file (named *fname*).

**trm\_print** (*justification=10*)

Print the triangular matrix as triangular

`encore.utils.print_square_array(array)`

Pretty print square matrix `numpy` array

**Arguments:**

**array** [`numpy.array`] `numpy` array to be printed.

`encore.utils.trm_indexes(a, b)`

Generate (i,j) indexes of a triangular matrix, between elements a and b. The matrix size is automatically determined from the number of elements. For instance: `trm_indexes((0,0),(2,1))` yields (0,0) (1,0) (1,1) (2,0) (2,1).

**Arguments:**

**a** [(int i, int j) tuple] starting matrix element.

**b** [(int i, int j) tuple] final matrix element.

`encore.utils.trm_indexes_nodiag(n)`

generate (i,j) indexes of a triangular matrix of n rows (or columns), without diagonal (e.g. no elements (0,0),(1,1),...,(n,n))

**Arguments:**

*n* [int ] Matrix size

`encore.utils.vararg_callback` (*option, opt\_str, value, parser*)

A callback for the option parser allowing a variable number of arguments.

## ENCORE.CLUSTERING PACKAGE

### 3.1 Submodules

### 3.2 `encore.clustering.Cluster` module

#### 3.2.1 Ensemble representation — `MAnalysis.analysis.ensemble.ensemble`

The module contains the `Cluster` and `ClusterCollection` classes which are designed to store results from clustering algorithms.

**class** `encore.clustering.Cluster.Cluster` (*elem\_list=None, centroid=None, idn=None, meta-data=None*)

Generic Cluster class for clusters with centroids.

**Attributes:**

*id* [int] Cluster ID number. Useful for the `ClustersCollection` class

*metadata* [iterable] dict of lists, containing metadata for the cluster elements. The iterable must return the same number of elements as those that belong to the cluster.

*size* [int] number of elements.

*centroid* [element object] cluster centroid.

*elements* [numpy.array] array containing the cluster elements.

**add\_metadata** (*name, data*)

**class** `encore.clustering.Cluster.ClustersCollection` (*elements=None, metadata=None*)

Clusters collection class; this class represents the results of a full clustering run. It stores a group of clusters defined as `encore.clustering.Cluster` objects.

**Attributes:**

*clusters* [list of Cluster objects] clusters object which are part of the Cluster collection

**get\_centroids** ()

Get the centroids of the clusters

**Returns:**

*centroids* [list of cluster element objects] list of cluster centroids

**get\_ids** ()

Get the ID numbers of the clusters

**Returns:**

*ids* [list of int ] list of cluster ids

### 3.3 encore.clustering.affinityprop module

**class** `encore.clustering.affinityprop.AffinityPropagation`

Affinity propagation clustering algorithm. This class is a Cython wrapper around the Affinity propagation algorithm, which is implement as a C library (see `ap.c`). The implemented algorithm is described in the paper:

Clustering by Passing Messages Between Data Points. Brendan J. Frey and Delbert Dueck, University of Toronto Science 315, 972–976, February 2007

**run** (*self*, *s*, *preference*, *double lam*, *int max\_iterations*, *int convergence*, *int noise=1*)

Run the clustering algorithm.

**Arguments:**

*s* [`encore.utils.TriangularMatrix` object] Triangular matrix containing the similarity values for each pair of clustering elements. Notice that the current implementation does not allow for asymmetric values (i.e. `similarity(a,b)` is assumed to be equal to `similarity(b,a)`)

*preference* [`numpy.array` of floats or float] Preference values, which the determine the number of clusters. If a single value is given, all the preference values are set to that. Otherwise, the list is used to set the preference values (one value per element, so the list must be of the same size as the number of elements)

*lam* [float] Floating point value that defines how much damping is applied to the solution at each iteration. Must be `]0,1]`

*max\_iterations* [int] Maximum number of iterations

*convergence* [int] Number of iterations in which the cluster centers must remain the same in order to reach convergence

*noise* [int] Whether to apply noise to the input *s* matrix, such there are no equal values. 1 is for yes, 0 is for no.

**Returns:**

*elements* [list of int or None] List of cluster-assigned elements, which can be used by `encore.utils.ClustersCollection` to generate Cluster objects. See these classes for more details.

## ENCORE.DIMENSIONALITY\_REDUCTION PACKAGE

### 4.1 Module contents

**class** `encore.dimensionality_reduction.stochasticproxembed.StochasticProximityEmbedding`

Stochastic proximity embedding dimensionality reduction algorithm. The algorithm implemented here is described in this paper:

Dmitrii N. Rassokhin, Dimitris K. Agrafiotis A modified update rule for stochastic proximity embedding *Journal of Molecular Graphics and Modelling* 22 (2003) 133–140

This class is a Cython wrapper for a C implementation (see `spe.c`)

**run** (*self*, *s*, *double rco*, *int dim*, *double maxlam*, *double minlam*, *int ncycle*, *int nstep*, *int stressfreq*)

Run stochastic proximity embedding.

**Arguments:**

*s* [`encore.utils.TriangularMatrix` object] Triangular matrix containing the distance values for each pair of elements in the original space.

*rco* [float] neighborhood distance cut-off

*dim* [int] number of dimensions for the embedded space

*minlam* [float] final learning parameter

*maxlam* [float] starting learning parameter

*ncycle* [int] number of cycles. Each cycle is composed of *nstep* steps. At the end of each cycle, the learning parameter *lambda* is updated.

*nstep* [int] number of coordinate update steps for each cycle

**Returns:**

*space* [(float, `numpy.array`)] float is the final stress obtained; the array are the coordinates of the elements in the embedded space

*stressfreq* [int] calculate and report stress value every *stressfreq* cycle

**class** `encore.dimensionality_reduction.stochasticproxembed.kNNStochasticProximityEmbedding`

k-Nearest Neighbours Stochastic proximity embedding dimensionality reduction algorithm. This is a variation of the SPE algorithm in which neighbourhood is not defined by a distance cut-off; instead, at each step, when a point is randomly chosen to perform coordinate updates, the coordinates of its *k* nearest neighbours are updated as well. This class is a Cython wrapper for a C implementation (see `spe.c`)

**run** (*self*, *s*, *int kn*, *int dim*, *double maxlam*, *double minlam*, *int ncycle*, *int nstep*, *int stressfreq*)

Run kNN-SPE.

**Arguments:**

*s* [encore.utils.TriangularMatrix object] Triangular matrix containing the distance values for each pair of elements in the original space.

*kn* [int] number of k points to be used as neighbours, in the original space

*dim* [int] number of dimensions for the embedded space

*minlam* [float] final learning parameter

*maxlam* [float] starting learning parameter

*ncycle* [int] number of cycles. Each cycle is composed of *nstep* steps. At the end of each cycle, the learning parameter *lambda* is updated.

*nstep* [int] number of coordinate update steps for each cycle

**Returns:**

*space* [(float, numpy.array)] float is the final stress obtained; the array are the coordinates of the elements in the embedded space

*stressfreq* [int] calculate and report stress value every *stressfreq* cycle

**e**

`encore.clustering.affinityprop`, [16](#)  
`encore.clustering.Cluster`, [15](#)  
`encore.confdistmatrix`, [4](#)  
`encore.covariance`, [5](#)  
`encore.dimensionality_reduction`, [17](#)  
`encore.dimensionality_reduction.stochasticproxembed`,  
[17](#)  
`encore.Ensemble`, [3](#)  
`encore.similarity`, [6](#)  
`encore.utils`, [11](#)





## A

add\_group() (encore.utils.OptionGroups method), 11  
 add\_metadata() (encore.clustering.Cluster.Cluster method), 15  
 add\_option() (encore.utils.OptionGroup method), 11  
 add\_option\_groups() (encore.utils.ParserPhase method), 12  
 AffinityPropagation (class in encore.clustering.affinityprop), 16  
 align() (encore.Ensemble.Ensemble method), 4  
 AllowUnrecognizedOptionParser (class in encore.utils), 11  
 AnimatedProgressBar (class in encore.utils), 11

## B

bootstrap\_coordinates() (in module encore.similarity), 6  
 bootstrap\_matrix() (in module encore.similarity), 6

## C

calculate() (encore.covariance.EstimatorML method), 5  
 calculate() (encore.covariance.EstimatorShrinkage method), 6  
 Cluster (class in encore.clustering.Cluster), 15  
 clustering\_ensemble\_similarity() (in module encore.similarity), 7  
 ClustersCollection (class in encore.clustering.Cluster), 15  
 ConformationalDistanceMatrixGenerator (class in encore.confdistmatrix), 4  
 covariance\_matrix() (in module encore.covariance), 6  
 cumulative\_clustering\_ensemble\_similarity() (in module encore.similarity), 7  
 cumulative\_gen\_kde\_pdfs() (in module encore.similarity), 7

## D

dimred\_ensemble\_similarity() (in module encore.similarity), 8  
 discrete\_jensen\_shannon\_divergence() (in module encore.similarity), 9  
 discrete\_kullback\_leibler\_divergence() (in module encore.similarity), 9  
 duplicate() (encore.utils.OptionGroup method), 11

## E

encore.clustering.affinityprop (module), 16  
 encore.clustering.Cluster (module), 15  
 encore.confdistmatrix (module), 4  
 encore.covariance (module), 5  
 encore.dimensionality\_reduction (module), 17  
 encore.dimensionality\_reduction.stochasticproxembed (module), 17  
 encore.Ensemble (module), 3  
 encore.similarity (module), 6  
 encore.utils (module), 11  
 Ensemble (class in encore.Ensemble), 3  
 EstimatorML (class in encore.covariance), 5  
 EstimatorShrinkage (class in encore.covariance), 5

## G

gen\_kde\_pdfs() (in module encore.similarity), 9  
 get\_centroids() (encore.clustering.Cluster.ClustersCollection method), 15  
 get\_coordinates() (encore.Ensemble.Ensemble method), 4  
 get\_ids() (encore.clustering.Cluster.ClustersCollection method), 15

## H

harmonic\_ensemble\_similarity() (in module encore.similarity), 9

## K

kNNStochasticProximityEmbedding (class in encore.dimensionality\_reduction.stochasticproxembed), 17

## L

loadz() (encore.utils.TriangularMatrix method), 13

## M

MinusRMSDMatrixGenerator (class in encore.confdistmatrix), 5

## O

OptionGroup (class in encore.utils), 11

OptionGroups (class in encore.utils), 11

## P

ParallelCalculation (class in encore.utils), 11

parse() (encore.utils.ParserPhase method), 12

ParserPhase (class in encore.utils), 12

PassThroughOptionParser (class in encore.utils), 12

print\_square\_array() (in module encore.utils), 13

ProgressBar (class in encore.utils), 12

## R

reset() (encore.utils.ProgressBar method), 12

RMSDMatrixGenerator (class in encore.confdistmatrix),  
5

run() (encore.clustering.affinityprop.AffinityPropagation  
method), 16

run() (encore.confdistmatrix.ConformationalDistanceMatrixGenerator  
method), 4

run() (encore.dimensionality\_reduction.stochasticproxembed.kNNStochasticProximityEmbedding  
method), 17

run() (encore.dimensionality\_reduction.stochasticproxembed.StochasticProximityEmbedding  
method), 17

run() (encore.utils.ParallelCalculation method), 12

## S

savez() (encore.utils.TriangularMatrix method), 13

show\_progress() (encore.utils.AnimatedProgressBar  
method), 11

square\_print() (encore.utils.TriangularMatrix method), 13

StochasticProximityEmbedding (class in en-  
core.dimensionality\_reduction.stochasticproxembed),  
17

## T

Tee (class in encore.utils), 12

TriangularMatrix (class in encore.utils), 13

trm\_indeces() (in module encore.utils), 13

trm\_indeces\_nodiag() (in module encore.utils), 13

trm\_print() (encore.utils.TriangularMatrix method), 13

## U

update() (encore.utils.ProgressBar method), 12

## V

vararg\_callback() (in module encore.utils), 14

## W

worker() (encore.utils.ParallelCalculation method), 12

write() (encore.utils.Tee method), 13

write\_output() (in module encore.similarity), 10

write\_output\_line() (in module encore.similarity), 10
