# Supplementary material for: ENCORE: Software for Quantitative Ensemble Comparison
Source: PLoS Comput Biol. 2015 Oct 27;11(10):e1004415. doi: 10.1371/journal.pcbi.1004415 (PMC4624683; doi:10.1371/journal.pcbi.1004415)
Supplement: S1 Software — (GZ) [file pcbi.1004415.s001.gz]

Archive with 92 entries (77 files):
- encore-master
- encore-master/CHANGELOG
- encore-master/docs
- encore-master/docs/_build
- encore-master/docs/_build/latex
- encore-master/docs/_build/latex/encore.pdf
- encore-master/docs/_build/latex/encore.tex
- encore-master/docs/conf.py
- encore-master/docs/encore-docs.pdf
- encore-master/docs/encore.clustering.rst
- encore-master/docs/encore.dimensionality_reduction.rst
- encore-master/docs/encore.rst
- encore-master/docs/index.rst
- encore-master/docs/intro.rst
- encore-master/docs/make.bat
- encore-master/docs/Makefile
- encore-master/docs/README
- encore-master/encore
- encore-master/encore/__init__.py
- encore-master/encore/clustering
- encore-master/encore/clustering/__init__.py
- encore-master/encore/clustering/Cluster.py
- encore-master/encore/confdistmatrix.py
- encore-master/encore/covariance.py
- encore-master/encore/dimensionality_reduction
- encore-master/encore/dimensionality_reduction/__init__.py
- encore-master/encore/Ensemble.py
- encore-master/encore/similarity.py
- encore-master/encore/utils.py
- encore-master/examples
- encore-master/examples/experimental_ubq_ensembles
- encore-master/examples/experimental_ubq_ensembles/ces.log
- encore-master/examples/experimental_ubq_ensembles/ces.sh
- encore-master/examples/experimental_ubq_ensembles/dres.log
- encore-master/examples/experimental_ubq_ensembles/dres.sh
- encore-master/examples/experimental_ubq_ensembles/filtered_1D3Z.pdb
- encore-master/examples/experimental_ubq_ensembles/filtered_1XQQ.pdb
- encore-master/examples/experimental_ubq_ensembles/filtered_2K39.pdb
- encore-master/examples/experimental_ubq_ensembles/filtered_2KOX.pdb
- encore-master/examples/experimental_ubq_ensembles/filtered_2LJ5.pdb
- encore-master/examples/experimental_ubq_ensembles/filtered_2NR2.pdb
- encore-master/examples/experimental_ubq_ensembles/filtered_reference.pdb
- encore-master/examples/experimental_ubq_ensembles/hes.log
- encore-master/examples/experimental_ubq_ensembles/hes.sh
- encore-master/examples/experimental_ubq_ensembles/README
- encore-master/examples/experimental_ubq_ensembles/xray.dcd
- encore-master/examples/md_simulations_ensembles
- encore-master/examples/md_simulations_ensembles/ces.log
- encore-master/examples/md_simulations_ensembles/ces.sh
- encore-master/examples/md_simulations_ensembles/dres.log
- encore-master/examples/md_simulations_ensembles/dres.sh
- encore-master/examples/md_simulations_ensembles/hes.log
- encore-master/examples/md_simulations_ensembles/hes.sh
- encore-master/examples/md_simulations_ensembles/README
- encore-master/examples/md_simulations_ensembles/topology.pdb
- encore-master/examples/md_simulations_ensembles/traj_c22-star.xtc
- encore-master/examples/md_simulations_ensembles/traj_c36.xtc
- encore-master/examples/md_simulations_ensembles/traj_ff99sb-ildn-star.xtc
- encore-master/examples/md_trajectory_convergence
- encore-master/examples/md_trajectory_convergence/ces.log
- encore-master/examples/md_trajectory_convergence/ces.sh
- encore-master/examples/md_trajectory_convergence/dres.log
- encore-master/examples/md_trajectory_convergence/dres.sh
- encore-master/examples/md_trajectory_convergence/README
- encore-master/examples/md_trajectory_convergence/topology.pdb
- encore-master/examples/md_trajectory_convergence/traj_c22-star.xtc
- encore-master/examples/md_trajectory_convergence/traj_ff99sb-ildn-star.xtc
- encore-master/examples/README
- encore-master/examples/set_environment.sh
- encore-master/ez_setup.py
- encore-master/INSTALL
- encore-master/LICENSE
- encore-master/MANIFEST.in
- encore-master/PKG-INFO
- encore-master/README.md
- encore-master/setup.cfg
- encore-master/setup.py
- encore-master/src
- encore-master/src/clustering
- encore-master/src/clustering/affinityprop.pyx
- encore-master/src/clustering/ap.c
- encore-master/src/clustering/ap.h
- encore-master/src/clustering/caffinityprop.pxd
- encore-master/src/cutils
- encore-master/src/cutils/cutils.pyx
- encore-master/src/dimensionality_reduction
- encore-master/src/dimensionality_reduction/cstochasticproxembed.pxd
- encore-master/src/dimensionality_reduction/spe.c
- encore-master/src/dimensionality_reduction/spe.h
- encore-master/src/dimensionality_reduction/stochasticproxembed.h
- encore-master/src/dimensionality_reduction/stochasticproxembed.pyx
- encore-master/SUMMARY.txt
