# Supplementary material for: ENCORE: Software for Quantitative Ensemble Comparison
Source: PLoS Comput Biol. 2015 Oct 27;11(10):e1004415. doi: 10.1371/journal.pcbi.1004415 (PMC4624683; doi:10.1371/journal.pcbi.1004415)
Supplement: S1 Software — (GZ) [file pcbi.1004415.s001.gz › encore-master/CHANGELOG]

======================
 ENCORE CHANGELOG
======================

v. 0.7:
	- First release
