# Supplementary material for: ENCORE: Software for Quantitative Ensemble Comparison
Source: PLoS Comput Biol. 2015 Oct 27;11(10):e1004415. doi: 10.1371/journal.pcbi.1004415 (PMC4624683; doi:10.1371/journal.pcbi.1004415)
Supplement: S1 Software — (GZ) [file pcbi.1004415.s001.gz › encore-master/docs/encore.rst]

.. role:: raw-math(raw)
    :format: latex html

encore package
==============

Submodules
----------

encore.Ensemble module
----------------------

.. automodule:: encore.Ensemble
    :members:
    :undoc-members:
    :show-inheritance:

encore.confdistmatrix module
----------------------------

.. automodule:: encore.confdistmatrix
    :members:
    :undoc-members:
    :show-inheritance:

encore.covariance module
------------------------

.. automodule:: encore.covariance
    :members:
    :undoc-members:
    :show-inheritance:

encore.similarity module
------------------------

.. automodule:: encore.similarity
    :members:
    :undoc-members:
    :show-inheritance:

encore.utils module
-------------------

.. automodule:: encore.utils
    :members:
    :undoc-members:
    :show-inheritance:
