# Supplementary material for: ENCORE: Software for Quantitative Ensemble Comparison
Source: PLoS Comput Biol. 2015 Oct 27;11(10):e1004415. doi: 10.1371/journal.pcbi.1004415 (PMC4624683; doi:10.1371/journal.pcbi.1004415)
Supplement: S1 Software — (GZ) [file pcbi.1004415.s001.gz › encore-master/docs/index.rst]

.. encore documentation master file, created by
   sphinx-quickstart on Wed May 21 15:14:01 2014.
   You can adapt this file completely to your liking, but it should at least
   contain the root `toctree` directive.

Welcome to encore's documentation!
==================================

.. include:: intro.rst
.. include:: encore.rst
.. include:: encore.clustering.rst
.. include:: encore.dimensionality_reduction.rst
