# Supplementary material for: ENCORE: Software for Quantitative Ensemble Comparison
Source: PLoS Comput Biol. 2015 Oct 27;11(10):e1004415. doi: 10.1371/journal.pcbi.1004415 (PMC4624683; doi:10.1371/journal.pcbi.1004415)
Supplement: S1 Software — (GZ) [file pcbi.1004415.s001.gz › encore-master/encore/Ensemble.py]

# Ensemble.py --- Representation of a protein ensemble
# Copyright (C) 2014 Wouter Boomsma, Matteo Tiberti
#
# This program is free software: you can redistribute it and/or modify
# it under the terms of the GNU General Public License as published by
# the Free Software Foundation, either version 3 of the License, or
# (at your option) any later version.

# This program is distributed in the hope that it will be useful,
# but WITHOUT ANY WARRANTY; without even the implied warranty of
# MERCHANTABILITY or FITNESS FOR A PARTICULAR PURPOSE.  See the
# GNU General Public License for more details.

# You should have received a copy of the GNU General Public License
# along with this program.  If not, see <http://www.gnu.org/licenses/>.

"""
Ensemble representation --- :mod:`MDAnalysis.analysis.ensemble.ensemble`
=====================================================================

This module contains the Ensemble class allowing for easy reading in 
and alignment of the ensemble contained in one or more trajectory files.
Trajectory files can be specified in several formats, including the popular
xtc and dcd, as well as experimental multiple-conformation pdb files, i.e.
those coming from NMR structure resoltion experiments.

"""

import MDAnalysis
import MDAnalysis.analysis
import MDAnalysis.analysis.align
import numpy
import logging

class Ensemble:
    '''
    Ensemble class designed to easily manage more than one trajectory files. Users can provide either a topology/trajectory(es) combination or a MDAnalysis.Universe object. Topology and trajectory files must have the same number of atoms, and order is of course important.
    
    While creating a new Ensemble object it is possible to load from a trajectory a selected subset of atoms, using the MDAnalysis syntax for selections (see http://mdanalysis.googlecode.com/git/package/doc/html/documentation_pages/selections.html for details) and the atom_selection_string argument. By default all the alpha carbons ("CA") are considered. It is also possible to load a lower number of frames for each trajectory, by selecting only one frame every frame_interval (e.g. with frame-interval=2 only every second frame will be loaded).
    
    Frames in an Ensemble object can be superimposed to a reference conformation (see method align). By default the rotation matrix for this superimposition is calculated on all the atoms of the system, as defined by the atom_selection_string. However, if the superimposition_selection_string is provided, that subset will be used to calculate the rotation matrix, which will be applied on the whole atom_selection_string. Notice that the set defined by superimposition_selection_string is completely independent from the atom_selection_string atoms, as it can be a subset or superset of that, although it must refer to the same topology.
    
    **Attributes**
    
    `topology_filename` : str
        Topology file name.

    `trajectory_filename` : str
        Trajectory file name. If more then one are specified, it is a list of comma-separated names (e.g. "traj1.xtc,traj2.xtc")

    `universe` : MDAnalysis.Universe
        Universe object containing the original trajectory(es) and all the atoms in the topology.
    
    `frame_interval` : int
        Keep only one frame every frame_interval (see the package or module description)
    
    `atom_selection_string` : str
        Atom selection string in the MDAnalysis format (see http://mdanalysis.googlecode.com/git/package/doc/html/documentation_pages/selections.html)
    
    `atom_selection` : MDAnalysis.core.AtomGroup
        MDAnalysis atom selection, which corresponds to the selection defined by atom_selection_string on universe
        
    `coordinates` : (x,N,3) numpy.array
        Array of coordinate which will be used in the calculations, where x is the number of frames and N is the number of atoms. Notice that these coordinates may be different from those of universe, because of the atom_selection and frame_interval.

    `superimposition_selection_string` : str
	Analogous to atom_selection_string, but related to the subset of atoms that will be used for 3D superimposition.

    `superimposition_selection` : MDAnalysis.core.AtomGroup
	Analogous to atom_selection, but related to the subset of atoms that will be used for 3D superimposition.

    `superimposition_coordinates` : (x,N,3) numpy.array
        Analogous to coordinates, but related to the subset of atoms that will be used for 3D superimposition.
    
    '''
    
    def __init__(self,
                 universe=None,
                 topology=None,
                 trajectory=None,
                 atom_selection_string='(name CA)',
                 superimposition_selection_string=None,
                 frame_interval=1):
        
        '''
        Constructor for the Ensemble class. See the module description for more details.
       	
	**Arguments:**

        `universe`: MDAnalysis.Universe
            If universe is specified, topology and trajectory will be ignored
        
        `topology` : str
            Topology file name
            
        `trajectory` : iterable of str
            One or more Trajectory file name(s)
            
        `atom_selection_string` : str
            
        `superimposition_selection_string` : str or None
            
        `frame_interval` : int
            
        '''
        
        
        if not universe:

            # Chained trajectories cannot use TimeSeries functionality
            # and the analysis is therefore slower - we therefore use a 
            # single trajectory value when possible
            if len(trajectory) == 1:
                trajectory = trajectory[0]
            self.universe = MDAnalysis.Universe(topology, 
                                                trajectory)
        else:
            self.universe = universe

        # Use one frame every frame_interval
        self.frame_interval = frame_interval
 
        # Set the attributes for the atom set on which calculation will be performed
        self.atom_selection_string = atom_selection_string
        self.atom_selection = self.universe.selectAtoms(self.atom_selection_string)
        self.coordinates = None
        self.coordinates = self.get_coordinates(subset_selection_string = self.atom_selection_string)

        # Set the attributes for the atom set on which fitting will be performed.
        # Fitting and calculation may be performed on two non-overlapping sets. This is optional.
        if superimposition_selection_string:
            self.superimposition_selection_string = superimposition_selection_string
            self.superimposition_selection = self.universe.selectAtoms(superimposition_selection_string)    
            self.superimposition_coordinates = self.get_coordinates(subset_selection_string = self.superimposition_selection_string)
        else:
            self.superimposition_selection_string = self.atom_selection_string
            self.superimposition_selection = self.atom_selection
            self.superimposition_coordinates = numpy.copy(self.coordinates)
        
       # Save trajectories filename for future reference
        if type(trajectory) == str:        
            self.trajectory_filename = trajectory
        else:
            self.trajectory_filename = ", ".join(trajectory)            

        # Save topology filename for future reference
        self.topology_filename = topology
                
    def get_coordinates(self, subset_selection_string=None):
        '''
        Get a set of coordinates from Universe.
            
        **Arguments:**

        `subset_selection_string` : None or str
            Selection string that selects the universe atoms whose coordinates have to be returned. The frame_interval will be automatically applied.
            If the argument is None,  the atoms defined in the atom_selection_string will be considered.
                
        **Returns:**

        `coordinates` : (x,N,3) numpy array
            The requested array of coordinates.
            
        '''
            
        if not subset_selection_string:
            subset_selection_string = self.atom_selection_string
        subset_selection = self.universe.selectAtoms(subset_selection_string)
        
        # Try to extract coordinates using Timeseries object
        # This is significantly faster, but only implemented for certain 
        # trajectory file formats

        if len(subset_selection) == 0:
            logging.error("ERROR: selection \'%s\' not found in topology."% subset_selection_string) 
            exit(1)
        try:
            subset_coordinates = self.universe.trajectory.timeseries(subset_selection, skip=self.frame_interval, format='fac')
        except:                     # if the Timeseries extraction fails, fall back to a slower approach
            n_coordinates = 0
            k = 0
            for i,time_step in enumerate(self.universe.trajectory):
                if (i % self.frame_interval) == 0:
                    n_coordinates += 1
            subset_coordinates = numpy.zeros(tuple([n_coordinates]) + subset_selection.coordinates().shape)
            
            for i, time_step in enumerate(self.universe.trajectory):
                if (i % self.frame_interval) == 0:
                    subset_coordinates[k] = subset_selection.coordinates(time_step)
                    k+=1
        return subset_coordinates

    def align(self, reference=None, weighted=True):
        '''
        Least-square superimposition of the Ensemble coordinates to a reference structure.
        
        **Arguments:**
        
        `reference` : None or MDAnalysis.Universe
            Reference structure on which those belonging to the Ensemble will be fitted upon.
            It must have the same topology as the Ensemble topology.
            If reference is None, the structure in the first frame of the ensemble will be used as reference.
        
        `weighted` : bool
            Whether to perform weighted superimposition or not
        
        '''
    
        #from matplotlib import pyplot as plt
        #from mpl_toolkits.mplot3d import Axes3D
        coordinates = self.coordinates
        alignment_subset_atom_selection = self.superimposition_selection
        alignment_subset_coordinates = self.superimposition_coordinates
        
        #fig = plt.figure()
        #ax = fig.gca(projection='3d')
        #for i in self.coordinates:
        #    print i[1]
        #    ax.plot(i[:,0], i[:,1], i[:,2])
        #fig.show()
        #plt.savefig("before.pdf")
        #plt.clf()
            
            
        if weighted:
            alignment_subset_masses = alignment_subset_atom_selection.masses()
        else:
            alignment_subset_masses = np.ones(alignment_subset_atom_selection.masses().shape[0])
        
        # Find center of mass of alignment subset for all frames 
        alignment_subset_coordinates_center_of_mass = numpy.average(alignment_subset_coordinates,
                                                   axis=1,
                                                   weights=alignment_subset_masses)

        #print alignment_subset_coordinates_center_of_mass[0]
        #print alignment_subset_coordinates[0]
                                                   
        # Move both subset atoms and the other atoms to the center of mass of subset atoms
        alignment_subset_coordinates -= alignment_subset_coordinates_center_of_mass[:,numpy.newaxis]
        #print alignment_subset_coordinates[0]
        coordinates -= alignment_subset_coordinates_center_of_mass[:,numpy.newaxis]
        #print coordinates.shape

        # if reference: no offset
        if reference:
            offset = 0
            # Select the same atoms in reference structure
            reference_atom_selection = reference.selectAtoms(self.superimposition_selection_string)
            reference_coordinates = reference_atom_selection.atoms.coordinates()

            if weighted:
                reference_masses = reference_atom_selection.masses()
            else:
                reference_masses = np.ones(reference_atom_selection.masses().shape[0])
        else:
            reference_coordinates = alignment_subset_coordinates[0]

            # Skip the first frame, which is used as reference
            offset = 1

        # Reference center of mass
        reference_center_of_mass = numpy.average(reference_coordinates, axis=0,
                                                     weights=reference_masses)
        #print reference_center_of_mass
        #print reference_coordinates

        # Move reference structure to its center of mass
        reference_coordinates -= reference_center_of_mass
        #print reference_coordinates

        # Apply optimal rotations for each frame
        for i in range(offset,len(self.coordinates)):

            # Find rotation matrix on alignment subset
            rotation_matrix = MDAnalysis.analysis.align.rotation_matrix(alignment_subset_coordinates[i], 
                                                                        reference_coordinates, 
                                                                        alignment_subset_masses)[0]
            
            # Apply rotation matrix
            self.coordinates[i][:] = numpy.transpose(numpy.dot(rotation_matrix, 
                                                               numpy.transpose(coordinates[i][:])))
        
        #import matplotlib.pyplot as plt
        #from mpl_toolkits.mplot3d import Axes3D
        #fig = plt.figure()
        #ax = fig.gca(projection='3d')
        #i= self.coordinates[-1]
        #print "ref", numpy.average(reference_coordinates, axis=0)
        #print "-1",  numpy.average(self.coordinates[-1],axis=0)
        #ax.plot(i[:,0], i[:,1], i[:,2], color='black')
        #ax.plot(reference_coordinates[:,0], reference_coordinates[:,1], reference_coordinates[:,2], color='red')
        #fig.show()
        #from time import sleep
        #sleep(15)

                                                       
