# Supplementary material for: ENCORE: Software for Quantitative Ensemble Comparison
Source: PLoS Comput Biol. 2015 Oct 27;11(10):e1004415. doi: 10.1371/journal.pcbi.1004415 (PMC4624683; doi:10.1371/journal.pcbi.1004415)
Supplement: S1 Software — (GZ) [file pcbi.1004415.s001.gz › encore-master/examples/experimental_ubq_ensembles/ces.log]

ln: creazione del collegamento simbolico "./encore" non riuscita: File già esistente
ln: creazione del collegamento simbolico "./MDAnalysis" non riuscita: File già esistente
Now running: ./similarity.py --save-matrix=minusrmsd_pw.npz --superimpose --convergence=50 --maxiter=500 --preferences=-5.0 --np=3 --nensembles 6 --topology filtered_reference.pdb --mode=ces -v --ensemble1-trajectory filtered_1XQQ.pdb --ensemble2-trajectory filtered_2K39.pdb --ensemble3-trajectory filtered_2KOX.pdb --ensemble4-trajectory filtered_2LJ5.pdb --ensemble5-trajectory filtered_2NR2.pdb --ensemble6-trajectory xray.dcd
/home/teo/.local/lib/python2.7/site-packages/ENCORE-0.7-py2.7-linux-x86_64.egg/encore//similarity.py
15-03-11 11:25:  Loading ensembles . . .
15-03-11 11:25:  Ensemble 1 Loaded.
    trajectories: filtered_1XQQ.pdb
    frame interval: 1
    number of frames: 128
    atoms selection: (name CA)
    number of atoms: 69

15-03-11 11:25:  Ensemble 2 Loaded.
    trajectories: filtered_2K39.pdb
    frame interval: 1
    number of frames: 116
    atoms selection: (name CA)
    number of atoms: 69

15-03-11 11:26:  Ensemble 3 Loaded.
    trajectories: filtered_2KOX.pdb
    frame interval: 1
    number of frames: 640
    atoms selection: (name CA)
    number of atoms: 69

15-03-11 11:26:  Ensemble 4 Loaded.
    trajectories: filtered_2LJ5.pdb
    frame interval: 1
    number of frames: 301
    atoms selection: (name CA)
    number of atoms: 69

15-03-11 11:26:  Ensemble 5 Loaded.
    trajectories: filtered_2NR2.pdb
    frame interval: 1
    number of frames: 144
    atoms selection: (name CA)
    number of atoms: 69

15-03-11 11:26:  Ensemble 6 Loaded.
    trajectories: xray.dcd
    frame interval: 1
    number of frames: 46
    atoms selection: (name CA)
    number of atoms: 69

15-03-11 11:26:  Done! 6 ensembles loaded.
15-03-11 11:26:  Performing least-square fit of each frame on the topology conformation.
15-03-11 11:26:  Similarity metric calculations will now begin. 6 values will be computed.
15-03-11 11:26:  3 core(s) will be used for parallel calculations.
15-03-11 11:26:  Chosen metric: Conformational clustering
15-03-11 11:26:      Similarity matrix: -RMSD matrix
15-03-11 11:26:          Perform pairwise alignment: True
15-03-11 11:26:          Mass-weighted alignment and RMSD: True
15-03-11 11:26:          Atoms subset for alignment: None
15-03-11 11:26:      Calculating similarity matrix . . .

[>................................................................................] 0%
[>................................................................................] 0%
[=>...............................................................................] 1%
[=>...............................................................................] 2%
[==>..............................................................................] 2%
[==>..............................................................................] 3%
[===>.............................................................................] 4%
[===>.............................................................................] 4%
[====>............................................................................] 5%
[====>............................................................................] 6%
[=====>...........................................................................] 6%
[======>..........................................................................] 7%
[======>..........................................................................] 8%
[=======>.........................................................................] 8%
[=======>.........................................................................] 9%
[========>........................................................................] 10%
[========>........................................................................] 11%
[=========>.......................................................................] 11%
[=========>.......................................................................] 12%
[==========>......................................................................] 13%
[===========>.....................................................................] 13%
[===========>.....................................................................] 14%
[============>....................................................................] 15%
[============>....................................................................] 15%
[=============>...................................................................] 16%
[=============>...................................................................] 17%
[==============>..................................................................] 17%
[==============>..................................................................] 18%
[===============>.................................................................] 19%
[================>................................................................] 20%
[================>................................................................] 20%
[=================>...............................................................] 21%
[=================>...............................................................] 22%
[==================>..............................................................] 22%
[==================>..............................................................] 23%
[===================>.............................................................] 24%
[===================>.............................................................] 24%
[====================>............................................................] 25%
[====================>............................................................] 26%
[=====================>...........................................................] 26%
[======================>..........................................................] 27%
[======================>..........................................................] 28%
[=======================>.........................................................] 28%
[=======================>.........................................................] 29%
[========================>........................................................] 30%
[========================>........................................................] 31%
[=========================>.......................................................] 31%
[=========================>.......................................................] 32%
[==========================>......................................................] 33%
[===========================>.....................................................] 33%
[===========================>.....................................................] 34%
[============================>....................................................] 35%
[============================>....................................................] 35%
[=============================>...................................................] 36%
[=============================>...................................................] 37%
[==============================>..................................................] 37%
[==============================>..................................................] 38%
[===============================>.................................................] 39%
[================================>................................................] 40%
[================================>................................................] 40%
[=================================>...............................................] 41%
[=================================>...............................................] 42%
[==================================>..............................................] 42%
[==================================>..............................................] 43%
[===================================>.............................................] 44%
[===================================>.............................................] 44%
[====================================>............................................] 45%
[====================================>............................................] 46%
[=====================================>...........................................] 46%
[======================================>..........................................] 47%
[======================================>..........................................] 48%
[=======================================>.........................................] 48%
[=======================================>.........................................] 49%
[========================================>........................................] 50%
[========================================>........................................] 51%
[=========================================>.......................................] 51%
[=========================================>.......................................] 52%
[==========================================>......................................] 53%
[===========================================>.....................................] 53%
[===========================================>.....................................] 54%
[============================================>....................................] 55%
[============================================>....................................] 55%
[=============================================>...................................] 56%
[=============================================>...................................] 57%
[==============================================>..................................] 57%
[==============================================>..................................] 58%
[===============================================>.................................] 59%
[================================================>................................] 60%
[================================================>................................] 60%
[=================================================>...............................] 61%
[=================================================>...............................] 62%
[==================================================>..............................] 62%
[==================================================>..............................] 63%
[===================================================>.............................] 64%
[===================================================>.............................] 64%
[====================================================>............................] 65%
[====================================================>............................] 66%
[=====================================================>...........................] 66%
[======================================================>..........................] 67%
[======================================================>..........................] 68%
[=======================================================>.........................] 68%
[=======================================================>.........................] 69%
[========================================================>........................] 70%
[========================================================>........................] 71%
[=========================================================>.......................] 71%
[=========================================================>.......................] 72%
[==========================================================>......................] 73%
[===========================================================>.....................] 73%
[===========================================================>.....................] 74%
[============================================================>....................] 75%
[============================================================>....................] 75%
[=============================================================>...................] 76%
[=============================================================>...................] 77%
[==============================================================>..................] 77%
[==============================================================>..................] 78%
[===============================================================>.................] 79%
[================================================================>................] 80%
[================================================================>................] 80%
[=================================================================>...............] 81%
[=================================================================>...............] 82%
[==================================================================>..............] 82%
[==================================================================>..............] 83%
[===================================================================>.............] 84%
[===================================================================>.............] 84%
[====================================================================>............] 85%
[=====================================================================>...........] 86%
[=====================================================================>...........] 86%
[======================================================================>..........] 87%
[======================================================================>..........] 88%
[=======================================================================>.........] 89%
[=======================================================================>.........] 89%
[========================================================================>........] 90%
[========================================================================>........] 91%
[=========================================================================>.......] 91%
[=========================================================================>.......] 92%
[==========================================================================>......] 93%
[===========================================================================>.....] 93%
[===========================================================================>.....] 94%
[============================================================================>....] 95%
[============================================================================>....] 95%
[=============================================================================>...] 96%
[=============================================================================>...] 97%
[==============================================================================>..] 98%
[==============================================================================>..] 98%
[===============================================================================>.] 99%
[===============================================================================>.] 99%
[================================================================================>] 100%15-03-11 11:26:      Done!
15-03-11 11:26:      Similarity matrix will be saved in minusrmsd_pw.npz.
15-03-11 11:26:      Clustering algorithm: Affinity Propagation
15-03-11 11:26:          Preference values: -5.00
15-03-11 11:26:          Maximum iterations: 500
15-03-11 11:26:          Convergence: 50
15-03-11 11:26:          Damping: 0.80
15-03-11 11:26:          Apply noise to similarity matrix: True
15-03-11 11:26:  WARNING: for optimal performance, the number of cores should be a factor of the number of preference values.
15-03-11 11:26:      Starting affinity propagation runs . . .
15-03-11 11:26:  Preference -5.00: starting Affinity Propagation
15-03-11 11:26:  Preference -5.00: converged in 85 iterations
15-03-11 11:26:  
    Done!
15-03-11 11:26:  Calculation complete.
# ==== Preference value: -5.00 ===
           ens.0      ens.1      ens.2      ens.3      ens.4      ens.5      
ens.0      0.000      0.116      0.300      0.226      0.156      0.347      
ens.1      0.116      0.000      0.115      0.081      0.058      0.172      
ens.2      0.300      0.115      0.000      0.088      0.097      0.035      
ens.3      0.226      0.081      0.088      0.000      0.072      0.129      
ens.4      0.156      0.058      0.097      0.072      0.000      0.143      
ens.5      0.347      0.172      0.035      0.129      0.143      0.000      
