# Supplementary material for: ENCORE: Software for Quantitative Ensemble Comparison
Source: PLoS Comput Biol. 2015 Oct 27;11(10):e1004415. doi: 10.1371/journal.pcbi.1004415 (PMC4624683; doi:10.1371/journal.pcbi.1004415)
Supplement: S1 Software — (GZ) [file pcbi.1004415.s001.gz › encore-master/examples/experimental_ubq_ensembles/dres.log]

ln: creazione del collegamento simbolico "./encore" non riuscita: File già esistente
ln: creazione del collegamento simbolico "./MDAnalysis" non riuscita: File già esistente
Now running: ./similarity.py --mode=dres --superimpose --np=3 --load-matrix=minusrmsd_pw.npz --change-matrix-sign --nensembles 6 --topology filtered_reference.pdb --use-density=resample --dim=3 --samples=10000 --nsteps=1000000 --ncycle=100 --neighborhood-cutoff=1.5 --spe-mode=vanilla -v --ensemble1-trajectory filtered_1XQQ.pdb --ensemble2-trajectory filtered_2K39.pdb --ensemble3-trajectory filtered_2KOX.pdb --ensemble4-trajectory filtered_2LJ5.pdb --ensemble5-trajectory filtered_2NR2.pdb --ensemble6-trajectory xray.dcd
15-03-11 11:26:  Loading ensembles . . .
15-03-11 11:26:  Ensemble 1 Loaded.
    trajectories: filtered_1XQQ.pdb
    frame interval: 1
    number of frames: 128
    atoms selection: (name CA)
    number of atoms: 69

15-03-11 11:26:  Ensemble 2 Loaded.
    trajectories: filtered_2K39.pdb
    frame interval: 1
    number of frames: 116
    atoms selection: (name CA)
    number of atoms: 69

15-03-11 11:27:  Ensemble 3 Loaded.
    trajectories: filtered_2KOX.pdb
    frame interval: 1
    number of frames: 640
    atoms selection: (name CA)
    number of atoms: 69

15-03-11 11:27:  Ensemble 4 Loaded.
    trajectories: filtered_2LJ5.pdb
    frame interval: 1
    number of frames: 301
    atoms selection: (name CA)
    number of atoms: 69

15-03-11 11:27:  Ensemble 5 Loaded.
    trajectories: filtered_2NR2.pdb
    frame interval: 1
    number of frames: 144
    atoms selection: (name CA)
    number of atoms: 69

15-03-11 11:27:  Ensemble 6 Loaded.
    trajectories: xray.dcd
    frame interval: 1
    number of frames: 46
    atoms selection: (name CA)
    number of atoms: 69

15-03-11 11:27:  Done! 6 ensembles loaded.
15-03-11 11:27:  Performing least-square fit of each frame on the topology conformation.
15-03-11 11:27:  Similarity metric calculations will now begin. 6 values will be computed.
15-03-11 11:27:  3 core(s) will be used for parallel calculations.
15-03-11 11:27:  Chosen metric: Dimensionality reduction
15-03-11 11:27:      Similarity matrix: RMSD matrix
15-03-11 11:27:          Loading similarity matrix from: minusrmsd_pw.npz
15-03-11 11:27:          Done!
15-03-11 11:27:          host : Diagon-Alley
15-03-11 11:27:          user : teo
15-03-11 11:27:          date : 2015-03-11 11:26:14.106894
15-03-11 11:27:          topology file : filtered_reference.pdb
15-03-11 11:27:          number of frames : 1375
15-03-11 11:27:          pairwise superimposition : True
15-03-11 11:27:          superimposition subset : (name CA)
15-03-11 11:27:          mass-weighted : True
15-03-11 11:27:          The matrix sign will be changed.
15-03-11 11:27:  Starting Stochastic Proximity Embedding
15-03-11 11:27:  Stochastic Proximity Embedding finished. Residual stress: 0.067
Calculation finished. - Residual stress: 0.067
15-03-11 11:27:  Calculation complete.
# ==== Number of dimensions: 3 ===
           ens.0      ens.1      ens.2      ens.3      ens.4      ens.5      
ens.0      0.000      0.226      0.301      0.226      0.141      0.420      
ens.1      0.226      0.000      0.380      0.355      0.317      0.468      
ens.2      0.301      0.380      0.000      0.070      0.128      0.172      
ens.3      0.226      0.355      0.070      0.000      0.077      0.251      
ens.4      0.141      0.317      0.128      0.077      0.000      0.308      
ens.5      0.420      0.468      0.172      0.251      0.308      0.000      
