# Supplementary material for: ENCORE: Software for Quantitative Ensemble Comparison
Source: PLoS Comput Biol. 2015 Oct 27;11(10):e1004415. doi: 10.1371/journal.pcbi.1004415 (PMC4624683; doi:10.1371/journal.pcbi.1004415)
Supplement: S1 Software — (GZ) [file pcbi.1004415.s001.gz › encore-master/examples/experimental_ubq_ensembles/dres.sh]

. ../set_environment.sh
ln -s $ENCORE_BUILD .
ln -s $MDANALYSIS_BUILD .

if [[ ! -e minusrmsd_pw.npz ]]; then
	echo "-RMSD Matrix file ( minusrmsd_pw.npz ) not found! Please run the clustering example first."
	exit
fi

# List of files containing the ensembles to be compared. The x-ray derived ensemble is included as a .DCD trajectory file.
pdbs=(filtered_1XQQ.pdb filtered_2K39.pdb filtered_2KOX.pdb filtered_2LJ5.pdb filtered_2NR2.pdb xray.dcd)

# number of ensembles
nensembles=6

# command line. Options:
# --topology: topology for the provided trajectories
# --mode=dres: dimensionality reduction ensemble similarity
# --nensembles: numbers of ensembles that will be used for calculation
# --load-matrix: load similarity (-RMSD) matrix instead of calculating it
# --change-matrix-sign: change the sign of the elements of the loaded matrix (so that we have a +RMSD matrix)
# --use-density, --dim, --samples, --nsteps=, --ncycle, --neighborhood-cutoff, --spe-mode: parameters for the Stochastic proximity embedding algorithm (see help for details)

cmdline="./similarity.py --mode=dres --superimpose --np=6 --load-matrix=minusrmsd_pw.npz --change-matrix-sign --nensembles $nensembles --topology filtered_reference.pdb --use-density=resample --dim=3 --samples=10000 --nsteps=1000000 --ncycle=100 --neighborhood-cutoff=1.5 --spe-mode=vanilla -v"

# for each ensemble: add the --ensemble-trajectory option to the command line. For instance: --ensemble1-trajectory filtered_1XQQ.pdb --ensemble2-trajectory filtered_2K39.pdb etc.
for i in $(seq 0 5); do
	cmdline=$cmdline" --ensemble$((i+1))-trajectory ${pdbs[$i]}"
done

# Run encore
echo "Now running: $cmdline"
$PYTHON encore/similarity.py $cmdline
