# Supplementary material for: ENCORE: Software for Quantitative Ensemble Comparison
Source: PLoS Comput Biol. 2015 Oct 27;11(10):e1004415. doi: 10.1371/journal.pcbi.1004415 (PMC4624683; doi:10.1371/journal.pcbi.1004415)
Supplement: S1 Software — (GZ) [file pcbi.1004415.s001.gz › encore-master/examples/experimental_ubq_ensembles/filtered_1D3Z.pdb]

MODEL      1
ATOM      1  N   GLN A   2      49.535 -88.953   7.698  1.00  9.27           N  
ATOM      2  CA  GLN A   2      48.664 -88.733   6.544  1.00  9.07           C  
ATOM      3  C   GLN A   2      48.393 -87.246   6.365  1.00  8.72           C  
ATOM      4  O   GLN A   2      48.199 -86.506   7.332  1.00  8.22           O  
ATOM      5  N   ILE A   3      48.341 -86.833   5.097  1.00  5.87           N  
ATOM      6  CA  ILE A   3      48.049 -85.451   4.732  1.00  5.07           C  
ATOM      7  C   ILE A   3      46.970 -85.458   3.649  1.00  4.01           C  
ATOM      8  O   ILE A   3      46.704 -86.499   3.043  1.00  4.61           O  
ATOM      9  N   PHE A   4      46.357 -84.295   3.399  1.00  4.55           N  
ATOM     10  CA  PHE A   4      45.309 -84.192   2.372  1.00  4.68           C  
ATOM     11  C   PHE A   4      45.645 -83.115   1.344  1.00  5.30           C  
ATOM     12  O   PHE A   4      46.106 -82.039   1.695  1.00  5.58           O  
ATOM     13  N   VAL A   5      45.364 -83.405   0.069  1.00  4.44           N  
ATOM     14  CA  VAL A   5      45.588 -82.434  -1.009  1.00  3.87           C  
ATOM     15  C   VAL A   5      44.269 -82.204  -1.739  1.00  4.93           C  
ATOM     16  O   VAL A   5      43.664 -83.145  -2.246  1.00  6.84           O  
ATOM     17  N   LYS A   6      43.832 -80.949  -1.812  1.00  6.04           N  
ATOM     18  CA  LYS A   6      42.584 -80.617  -2.511  1.00  6.12           C  
ATOM     19  C   LYS A   6      42.882 -80.074  -3.908  1.00  6.57           C  
ATOM     20  O   LYS A   6      43.847 -79.336  -4.107  1.00  5.76           O  
ATOM     21  N   THR A   7      42.032 -80.446  -4.877  1.00  7.41           N  
ATOM     22  CA  THR A   7      42.196 -79.992  -6.258  1.00  7.48           C  
ATOM     23  C   THR A   7      41.223 -78.859  -6.583  1.00  8.75           C  
ATOM     24  O   THR A   7      40.265 -78.591  -5.857  1.00  8.58           O  
ATOM     25  N   LEU A   8      41.511 -78.222  -7.689  1.00  9.84           N  
ATOM     26  CA  LEU A   8      40.689 -77.107  -8.160  1.00 14.15           C  
ATOM     27  C   LEU A   8      39.276 -77.569  -8.502  1.00 17.37           C  
ATOM     28  O   LEU A   8      38.359 -76.752  -8.585  1.00 17.01           O  
ATOM     29  N   THR A   9      39.096 -78.876  -8.725  1.00 18.33           N  
ATOM     30  CA  THR A   9      37.774 -79.402  -9.085  1.00 19.24           C  
ATOM     31  C   THR A   9      36.991 -79.877  -7.863  1.00 19.48           C  
ATOM     32  O   THR A   9      35.844 -80.307  -7.984  1.00 23.14           O  
ATOM     33  N   GLY A  10      37.593 -79.754  -6.680  1.00 19.43           N  
ATOM     34  CA  GLY A  10      36.910 -80.128  -5.439  1.00 18.74           C  
ATOM     35  C   GLY A  10      37.210 -81.551  -4.979  1.00 17.62           C  
ATOM     36  O   GLY A  10      36.529 -82.088  -4.105  1.00 19.74           O  
ATOM     37  N   LYS A  11      38.239 -82.153  -5.570  1.00 13.56           N  
ATOM     38  CA  LYS A  11      38.609 -83.519  -5.191  1.00 11.91           C  
ATOM     39  C   LYS A  11      39.625 -83.480  -4.052  1.00 10.18           C  
ATOM     40  O   LYS A  11      40.476 -82.598  -4.027  1.00  9.10           O  
ATOM     41  N   THR A  12      39.562 -84.444  -3.126  1.00  9.63           N  
ATOM     42  CA  THR A  12      40.532 -84.487  -2.015  1.00  9.85           C  
ATOM     43  C   THR A  12      41.335 -85.787  -2.102  1.00 11.66           C  
ATOM     44  O   THR A  12      40.756 -86.871  -2.167  1.00 12.33           O  
ATOM     45  N   ILE A  13      42.669 -85.680  -2.080  1.00 10.42           N  
ATOM     46  CA  ILE A  13      43.535 -86.867  -2.134  1.00 11.84           C  
ATOM     47  C   ILE A  13      44.252 -87.049  -0.796  1.00 10.55           C  
ATOM     48  O   ILE A  13      44.726 -86.082  -0.206  1.00 11.92           O  
ATOM     49  N   THR A  14      44.351 -88.301  -0.337  1.00  9.39           N  
ATOM     50  CA  THR A  14      45.044 -88.600   0.920  1.00  9.63           C  
ATOM     51  C   THR A  14      46.395 -89.227   0.597  1.00 11.20           C  
ATOM     52  O   THR A  14      46.476 -90.137  -0.229  1.00 11.63           O  
ATOM     53  N   LEU A  15      47.460 -88.734   1.234  1.00  8.29           N  
ATOM     54  CA  LEU A  15      48.810 -89.256   0.981  1.00  9.03           C  
ATOM     55  C   LEU A  15      49.485 -89.650   2.288  1.00  8.59           C  
ATOM     56  O   LEU A  15      49.257 -89.025   3.322  1.00  7.79           O  
ATOM     57  N   GLU A  16      50.374 -90.644   2.224  1.00 11.04           N  
ATOM     58  CA  GLU A  16      51.140 -91.052   3.405  1.00 11.50           C  
ATOM     59  C   GLU A  16      52.520 -90.425   3.258  1.00 10.13           C  
ATOM     60  O   GLU A  16      53.202 -90.646   2.257  1.00  9.83           O  
ATOM     61  N   VAL A  17      52.923 -89.619   4.239  1.00  8.99           N  
ATOM     62  CA  VAL A  17      54.219 -88.941   4.178  1.00  8.85           C  
ATOM     63  C   VAL A  17      54.912 -88.921   5.532  1.00  8.04           C  
ATOM     64  O   VAL A  17      54.307 -89.185   6.570  1.00  8.99           O  
ATOM     65  N   GLU A  18      56.188 -88.548   5.494  1.00  7.29           N  
ATOM     66  CA  GLU A  18      57.003 -88.414   6.700  1.00  7.08           C  
ATOM     67  C   GLU A  18      57.445 -86.949   6.787  1.00  6.45           C  
ATOM     68  O   GLU A  18      57.570 -86.302   5.748  1.00  5.28           O  
ATOM     69  N   PRO A  19      57.677 -86.380   7.952  1.00  7.24           N  
ATOM     70  CA  PRO A  19      58.089 -84.957   8.021  1.00  7.07           C  
ATOM     71  C   PRO A  19      59.370 -84.676   7.239  1.00  6.65           C  
ATOM     72  O   PRO A  19      59.620 -83.540   6.830  1.00  6.37           O  
ATOM     73  N   SER A  20      60.187 -85.712   7.048  1.00  6.80           N  
ATOM     74  CA  SER A  20      61.451 -85.564   6.330  1.00  6.28           C  
ATOM     75  C   SER A  20      61.270 -85.685   4.821  1.00  8.45           C  
ATOM     76  O   SER A  20      62.234 -85.527   4.071  1.00  7.26           O  
ATOM     77  N   ASP A  21      60.047 -85.937   4.359  1.00  7.50           N  
ATOM     78  CA  ASP A  21      59.812 -86.033   2.925  1.00  7.70           C  
ATOM     79  C   ASP A  21      59.947 -84.642   2.335  1.00  7.08           C  
ATOM     80  O   ASP A  21      59.531 -83.638   2.928  1.00  8.11           O  
ATOM     81  N   THR A  22      60.512 -84.612   1.127  1.00  5.37           N  
ATOM     82  CA  THR A  22      60.687 -83.370   0.399  1.00  6.01           C  
ATOM     83  C   THR A  22      59.429 -83.053  -0.395  1.00  8.01           C  
ATOM     84  O   THR A  22      58.653 -83.940  -0.732  1.00  8.11           O  
ATOM     85  N   ILE A  23      59.257 -81.785  -0.712  1.00  8.32           N  
ATOM     86  CA  ILE A  23      58.114 -81.350  -1.506  1.00  9.92           C  
ATOM     87  C   ILE A  23      58.172 -82.016  -2.883  1.00 10.01           C  
ATOM     88  O   ILE A  23      57.149 -82.450  -3.407  1.00  8.71           O  
ATOM     89  N   GLU A  24      59.374 -82.123  -3.454  1.00  9.54           N  
ATOM     90  CA  GLU A  24      59.531 -82.781  -4.753  1.00 11.81           C  
ATOM     91  C   GLU A  24      59.048 -84.224  -4.633  1.00 11.14           C  
ATOM     92  O   GLU A  24      58.428 -84.756  -5.550  1.00 10.62           O  
ATOM     93  N   ASN A  25      59.337 -84.850  -3.496  1.00  9.43           N  
ATOM     94  CA  ASN A  25      58.911 -86.234  -3.292  1.00 10.96           C  
ATOM     95  C   ASN A  25      57.386 -86.285  -3.228  1.00  9.68           C  
ATOM     96  O   ASN A  25      56.766 -87.191  -3.779  1.00  9.33           O  
ATOM     97  N   VAL A  26      56.789 -85.296  -2.564  1.00  6.52           N  
ATOM     98  CA  VAL A  26      55.334 -85.235  -2.454  1.00  5.53           C  
ATOM     99  C   VAL A  26      54.715 -85.072  -3.843  1.00  4.42           C  
ATOM    100  O   VAL A  26      53.737 -85.746  -4.169  1.00  3.40           O  
ATOM    101  N   LYS A  27      55.293 -84.192  -4.675  1.00  2.64           N  
ATOM    102  CA  LYS A  27      54.785 -83.986  -6.028  1.00  4.14           C  
ATOM    103  C   LYS A  27      54.855 -85.302  -6.798  1.00  5.58           C  
ATOM    104  O   LYS A  27      53.959 -85.631  -7.568  1.00  4.11           O  
ATOM    105  N   ALA A  28      55.945 -86.037  -6.589  1.00  6.61           N  
ATOM    106  CA  ALA A  28      56.136 -87.305  -7.282  1.00  7.74           C  
ATOM    107  C   ALA A  28      55.038 -88.289  -6.898  1.00  9.17           C  
ATOM    108  O   ALA A  28      54.548 -89.043  -7.738  1.00 11.45           O  
ATOM    109  N   LYS A  29      54.641 -88.265  -5.635  1.00  8.96           N  
ATOM    110  CA  LYS A  29      53.581 -89.149  -5.169  1.00  7.90           C  
ATOM    111  C   LYS A  29      52.260 -88.775  -5.847  1.00  6.92           C  
ATOM    112  O   LYS A  29      51.498 -89.648  -6.252  1.00  6.87           O  
ATOM    113  N   ILE A  30      52.022 -87.464  -6.015  1.00  4.57           N  
ATOM    114  CA  ILE A  30      50.817 -86.979  -6.696  1.00  5.58           C  
ATOM    115  C   ILE A  30      50.844 -87.416  -8.164  1.00  7.26           C  
ATOM    116  O   ILE A  30      49.817 -87.804  -8.711  1.00  9.46           O  
ATOM    117  N   GLN A  31      52.013 -87.359  -8.797  1.00  7.06           N  
ATOM    118  CA  GLN A  31      52.134 -87.762 -10.201  1.00  8.67           C  
ATOM    119  C   GLN A  31      51.726 -89.222 -10.343  1.00 10.90           C  
ATOM    120  O   GLN A  31      51.015 -89.601 -11.275  1.00  9.63           O  
ATOM    121  N   ASP A  32      52.206 -90.025  -9.422  1.00 10.93           N  
ATOM    122  CA  ASP A  32      51.912 -91.448  -9.458  1.00 14.01           C  
ATOM    123  C   ASP A  32      50.406 -91.692  -9.363  1.00 14.04           C  
ATOM    124  O   ASP A  32      49.871 -92.587 -10.018  1.00 13.39           O  
ATOM    125  N   LYS A  33      49.738 -90.923  -8.508  1.00 14.22           N  
ATOM    126  CA  LYS A  33      48.301 -91.093  -8.288  1.00 14.00           C  
ATOM    127  C   LYS A  33      47.412 -90.414  -9.345  1.00 12.37           C  
ATOM    128  O   LYS A  33      46.358 -90.950  -9.687  1.00 12.17           O  
ATOM    129  N   GLU A  34      47.771 -89.202  -9.789  1.00 10.11           N  
ATOM    130  CA  GLU A  34      46.905 -88.441 -10.719  1.00 10.07           C  
ATOM    131  C   GLU A  34      47.431 -88.271 -12.154  1.00  9.32           C  
ATOM    132  O   GLU A  34      46.667 -87.933 -13.058  1.00 11.61           O  
ATOM    133  N   GLY A  35      48.715 -88.537 -12.367  1.00  7.22           N  
ATOM    134  CA  GLY A  35      49.293 -88.440 -13.713  1.00  6.29           C  
ATOM    135  C   GLY A  35      49.681 -87.007 -14.100  1.00  6.93           C  
ATOM    136  O   GLY A  35      49.981 -86.726 -15.260  1.00  7.41           O  
ATOM    137  N   ILE A  36      49.665 -86.114 -13.122  1.00  5.86           N  
ATOM    138  CA  ILE A  36      50.010 -84.710 -13.367  1.00  6.07           C  
ATOM    139  C   ILE A  36      51.535 -84.521 -13.253  1.00  6.36           C  
ATOM    140  O   ILE A  36      52.087 -84.732 -12.172  1.00  6.18           O  
ATOM    141  N   PRO A  37      52.243 -84.132 -14.303  1.00  8.65           N  
ATOM    142  CA  PRO A  37      53.724 -83.939 -14.205  1.00  9.18           C  
ATOM    143  C   PRO A  37      54.106 -82.886 -13.132  1.00  9.85           C  
ATOM    144  O   PRO A  37      53.488 -81.824 -13.067  1.00  8.51           O  
ATOM    145  N   PRO A  38      55.100 -83.157 -12.287  1.00  8.71           N  
ATOM    146  CA  PRO A  38      55.531 -82.201 -11.208  1.00  9.08           C  
ATOM    147  C   PRO A  38      55.765 -80.760 -11.691  1.00  9.28           C  
ATOM    148  O   PRO A  38      55.576 -79.822 -10.917  1.00  6.50           O  
ATOM    149  N   ASP A  39      56.197 -80.568 -12.927  1.00 11.20           N  
ATOM    150  CA  ASP A  39      56.465 -79.212 -13.411  1.00 14.96           C  
ATOM    151  C   ASP A  39      55.180 -78.412 -13.619  1.00 13.99           C  
ATOM    152  O   ASP A  39      55.223 -77.188 -13.739  1.00 13.75           O  
ATOM    153  N   GLN A  40      54.038 -79.098 -13.673  1.00 11.60           N  
ATOM    154  CA  GLN A  40      52.752 -78.419 -13.882  1.00 10.76           C  
ATOM    155  C   GLN A  40      51.991 -78.233 -12.572  1.00  8.01           C  
ATOM    156  O   GLN A  40      50.862 -77.743 -12.568  1.00  8.96           O  
ATOM    157  N   GLN A  41      52.594 -78.661 -11.469  1.00  6.52           N  
ATOM    158  CA  GLN A  41      51.939 -78.574 -10.158  1.00  3.87           C  
ATOM    159  C   GLN A  41      52.535 -77.506  -9.236  1.00  4.79           C  
ATOM    160  O   GLN A  41      53.752 -77.366  -9.117  1.00  6.34           O  
ATOM    161  N   ARG A  42      51.636 -76.809  -8.532  1.00  5.73           N  
ATOM    162  CA  ARG A  42      52.011 -75.798  -7.540  1.00  6.97           C  
ATOM    163  C   ARG A  42      51.319 -76.144  -6.222  1.00  7.15           C  
ATOM    164  O   ARG A  42      50.099 -76.285  -6.182  1.00  7.33           O  
ATOM    165  N   LEU A  43      52.089 -76.299  -5.146  1.00  4.65           N  
ATOM    166  CA  LEU A  43      51.524 -76.652  -3.836  1.00  3.51           C  
ATOM    167  C   LEU A  43      51.523 -75.449  -2.903  1.00  5.56           C  
ATOM    168  O   LEU A  43      52.533 -74.765  -2.740  1.00  4.19           O  
ATOM    169  N   ILE A  44      50.362 -75.202  -2.296  1.00  4.58           N  
ATOM    170  CA  ILE A  44      50.188 -74.080  -1.371  1.00  5.55           C  
ATOM    171  C   ILE A  44      49.705 -74.578  -0.009  1.00  5.46           C  
ATOM    172  O   ILE A  44      48.813 -75.422   0.082  1.00  6.04           O  
ATOM    173  N   PHE A  45      50.281 -74.002   1.043  1.00  6.75           N  
ATOM    174  CA  PHE A  45      49.893 -74.332   2.411  1.00  4.70           C  
ATOM    175  C   PHE A  45      49.853 -73.054   3.233  1.00  6.34           C  
ATOM    176  O   PHE A  45      50.819 -72.292   3.263  1.00  5.45           O  
ATOM    177  N   ALA A  46      48.731 -72.823   3.894  1.00  6.53           N  
ATOM    178  CA  ALA A  46      48.562 -71.635   4.714  1.00  7.15           C  
ATOM    179  C   ALA A  46      48.946 -70.368   3.948  1.00  9.00           C  
ATOM    180  O   ALA A  46      49.500 -69.428   4.518  1.00 11.15           O  
ATOM    181  N   GLY A  47      48.586 -70.332   2.662  1.00  9.35           N  
ATOM    182  CA  GLY A  47      48.834 -69.149   1.835  1.00 11.68           C  
ATOM    183  C   GLY A  47      50.252 -69.048   1.264  1.00 11.14           C  
ATOM    184  O   GLY A  47      50.554 -68.077   0.571  1.00 13.93           O  
ATOM    185  N   LYS A  48      51.133 -70.015   1.551  1.00 10.47           N  
ATOM    186  CA  LYS A  48      52.516 -69.949   1.042  1.00  8.82           C  
ATOM    187  C   LYS A  48      52.794 -71.045   0.009  1.00  7.68           C  
ATOM    188  O   LYS A  48      52.391 -72.193   0.187  1.00  6.47           O  
ATOM    189  N   GLN A  49      53.519 -70.684  -1.054  1.00  8.89           N  
ATOM    190  CA  GLN A  49      53.882 -71.653  -2.089  1.00  7.18           C  
ATOM    191  C   GLN A  49      55.067 -72.463  -1.568  1.00  8.23           C  
ATOM    192  O   GLN A  49      56.056 -71.897  -1.101  1.00  9.70           O  
ATOM    193  N   LEU A  50      54.959 -73.786  -1.629  1.00  6.51           N  
ATOM    194  CA  LEU A  50      56.025 -74.658  -1.137  1.00  7.41           C  
ATOM    195  C   LEU A  50      57.079 -74.922  -2.216  1.00  8.27           C  
ATOM    196  O   LEU A  50      56.748 -75.159  -3.378  1.00  8.34           O  
ATOM    197  N   GLU A  51      58.360 -74.861  -1.820  1.00  9.43           N  
ATOM    198  CA  GLU A  51      59.465 -75.080  -2.768  1.00 11.90           C  
ATOM    199  C   GLU A  51      59.890 -76.548  -2.824  1.00 11.49           C  
ATOM    200  O   GLU A  51      59.745 -77.291  -1.855  1.00  9.88           O  
ATOM    201  N   ASP A  52      60.377 -76.954  -4.001  1.00 12.71           N  
ATOM    202  CA  ASP A  52      60.780 -78.344  -4.229  1.00 16.56           C  
ATOM    203  C   ASP A  52      62.035 -78.757  -3.442  1.00 15.83           C  
ATOM    204  O   ASP A  52      62.278 -79.950  -3.256  1.00 17.21           O  
ATOM    205  N   GLY A  53      62.840 -77.796  -2.995  1.00 15.00           N  
ATOM    206  CA  GLY A  53      64.071 -78.118  -2.249  1.00 11.77           C  
ATOM    207  C   GLY A  53      63.871 -78.110  -0.725  1.00 11.10           C  
ATOM    208  O   GLY A  53      64.829 -78.307   0.022  1.00 11.25           O  
ATOM    209  N   ARG A  54      62.644 -77.895  -0.266  1.00  8.53           N  
ATOM    210  CA  ARG A  54      62.364 -77.882   1.187  1.00  9.05           C  
ATOM    211  C   ARG A  54      61.537 -79.111   1.608  1.00  8.96           C  
ATOM    212  O   ARG A  54      60.978 -79.811   0.762  1.00 11.60           O  
ATOM    213  N   THR A  55      61.465 -79.371   2.933  1.00  9.05           N  
ATOM    214  CA  THR A  55      60.698 -80.517   3.466  1.00  9.03           C  
ATOM    215  C   THR A  55      59.411 -80.070   4.164  1.00  8.15           C  
ATOM    216  O   THR A  55      59.220 -78.895   4.469  1.00  5.91           O  
ATOM    217  N   LEU A  56      58.545 -81.056   4.433  1.00  6.91           N  
ATOM    218  CA  LEU A  56      57.278 -80.797   5.131  1.00  8.29           C  
ATOM    219  C   LEU A  56      57.528 -80.200   6.516  1.00  8.05           C  
ATOM    220  O   LEU A  56      56.822 -79.280   6.928  1.00 10.17           O  
ATOM    221  N   SER A  57      58.509 -80.736   7.254  1.00  8.92           N  
ATOM    222  CA  SER A  57      58.765 -80.224   8.600  1.00  9.00           C  
ATOM    223  C   SER A  57      59.175 -78.754   8.582  1.00  9.44           C  
ATOM    224  O   SER A  57      58.907 -78.019   9.532  1.00 10.91           O  
ATOM    225  N   ASP A  58      59.824 -78.330   7.513  1.00  9.11           N  
ATOM    226  CA  ASP A  58      60.263 -76.942   7.410  1.00  7.91           C  
ATOM    227  C   ASP A  58      59.063 -75.999   7.430  1.00  9.12           C  
ATOM    228  O   ASP A  58      59.169 -74.856   7.874  1.00  8.61           O  
ATOM    229  N   TYR A  59      57.920 -76.487   6.943  1.00  7.97           N  
ATOM    230  CA  TYR A  59      56.693 -75.684   6.903  1.00  8.45           C  
ATOM    231  C   TYR A  59      55.758 -76.026   8.060  1.00 10.98           C  
ATOM    232  O   TYR A  59      54.587 -75.646   8.052  1.00 12.95           O  
ATOM    233  N   ASN A  60      56.276 -76.746   9.057  1.00 12.38           N  
ATOM    234  CA  ASN A  60      55.497 -77.145  10.224  1.00 13.94           C  
ATOM    235  C   ASN A  60      54.171 -77.792   9.834  1.00 14.16           C  
ATOM    236  O   ASN A  60      53.151 -77.573  10.487  1.00 14.26           O  
ATOM    237  N   ILE A  61      54.196 -78.618   8.791  1.00 11.08           N  
ATOM    238  CA  ILE A  61      52.985 -79.318   8.364  1.00 11.78           C  
ATOM    239  C   ILE A  61      52.816 -80.531   9.273  1.00 13.74           C  
ATOM    240  O   ILE A  61      53.717 -81.362   9.388  1.00 14.60           O  
ATOM    241  N   GLN A  62      51.672 -80.595   9.965  1.00 13.97           N  
ATOM    242  CA  GLN A  62      51.389 -81.666  10.927  1.00 15.52           C  
ATOM    243  C   GLN A  62      50.344 -82.649  10.400  1.00 13.94           C  
ATOM    244  O   GLN A  62      49.710 -82.418   9.371  1.00 12.15           O  
ATOM    245  N   LYS A  63      50.204 -83.763  11.116  1.00 11.73           N  
ATOM    246  CA  LYS A  63      49.257 -84.788  10.688  1.00 11.97           C  
ATOM    247  C   LYS A  63      47.872 -84.199  10.418  1.00 10.41           C  
ATOM    248  O   LYS A  63      47.407 -83.301  11.121  1.00  9.59           O  
ATOM    249  N   GLU A  64      47.241 -84.717   9.367  1.00 10.04           N  
ATOM    250  CA  GLU A  64      45.916 -84.274   8.932  1.00 10.94           C  
ATOM    251  C   GLU A  64      45.911 -82.843   8.407  1.00  9.74           C  
ATOM    252  O   GLU A  64      44.857 -82.210   8.344  1.00  9.42           O  
ATOM    253  N   SER A  65      47.058 -82.356   7.959  1.00  6.85           N  
ATOM    254  CA  SER A  65      47.140 -81.032   7.359  1.00  6.90           C  
ATOM    255  C   SER A  65      46.585 -81.121   5.945  1.00  4.72           C  
ATOM    256  O   SER A  65      46.707 -82.156   5.291  1.00  3.91           O  
ATOM    257  N   THR A  66      45.979 -80.029   5.464  1.00  4.48           N  
ATOM    258  CA  THR A  66      45.416 -79.990   4.115  1.00  3.80           C  
ATOM    259  C   THR A  66      46.216 -79.013   3.256  1.00  4.60           C  
ATOM    260  O   THR A  66      46.328 -77.830   3.577  1.00  5.33           O  
ATOM    261  N   LEU A  67      46.725 -79.515   2.135  1.00  4.17           N  
ATOM    262  CA  LEU A  67      47.467 -78.690   1.184  1.00  3.85           C  
ATOM    263  C   LEU A  67      46.563 -78.438  -0.009  1.00  3.80           C  
ATOM    264  O   LEU A  67      45.633 -79.201  -0.273  1.00  5.54           O  
ATOM    265  N   HIS A  68      46.852 -77.366  -0.742  1.00  2.94           N  
ATOM    266  CA  HIS A  68      46.079 -77.015  -1.927  1.00  4.17           C  
ATOM    267  C   HIS A  68      46.948 -77.193  -3.163  1.00  5.32           C  
ATOM    268  O   HIS A  68      48.104 -76.769  -3.185  1.00  7.70           O  
ATOM    269  N   LEU A  69      46.394 -77.828  -4.192  1.00  5.29           N  
ATOM    270  CA  LEU A  69      47.128 -78.067  -5.434  1.00  3.97           C  
ATOM    271  C   LEU A  69      46.601 -77.125  -6.508  1.00  5.07           C  
ATOM    272  O   LEU A  69      45.391 -77.010  -6.702  1.00  4.34           O  
ATOM    273  N   VAL A  70      47.522 -76.463  -7.228  1.00  4.29           N  
ATOM    274  CA  VAL A  70      47.197 -75.542  -8.311  1.00  6.26           C  
ATOM    275  C   VAL A  70      47.858 -76.069  -9.578  1.00  9.22           C  
ATOM    276  O   VAL A  70      48.944 -76.644  -9.539  1.00  9.36           O  
TER
ENDMDL
MODEL      2
ATOM      1  N   GLN A   2      50.554 -87.663   8.468  1.00  9.27           N  
ATOM      2  CA  GLN A   2      49.701 -87.785   7.286  1.00  9.07           C  
ATOM      3  C   GLN A   2      49.120 -86.428   6.916  1.00  8.72           C  
ATOM      4  O   GLN A   2      48.714 -85.648   7.779  1.00  8.22           O  
ATOM      5  N   ILE A   3      49.052 -86.178   5.606  1.00  5.87           N  
ATOM      6  CA  ILE A   3      48.485 -84.943   5.074  1.00  5.07           C  
ATOM      7  C   ILE A   3      47.471 -85.294   3.986  1.00  4.01           C  
ATOM      8  O   ILE A   3      47.427 -86.433   3.515  1.00  4.61           O  
ATOM      9  N   PHE A   4      46.663 -84.308   3.583  1.00  4.55           N  
ATOM     10  CA  PHE A   4      45.653 -84.530   2.538  1.00  4.68           C  
ATOM     11  C   PHE A   4      45.824 -83.538   1.393  1.00  5.30           C  
ATOM     12  O   PHE A   4      46.053 -82.362   1.621  1.00  5.58           O  
ATOM     13  N   VAL A   5      45.666 -84.019   0.155  1.00  4.44           N  
ATOM     14  CA  VAL A   5      45.755 -83.146  -1.025  1.00  3.87           C  
ATOM     15  C   VAL A   5      44.437 -83.228  -1.792  1.00  4.93           C  
ATOM     16  O   VAL A   5      44.017 -84.311  -2.190  1.00  6.84           O  
ATOM     17  N   LYS A   6      43.794 -82.081  -2.022  1.00  6.04           N  
ATOM     18  CA  LYS A   6      42.531 -82.054  -2.773  1.00  6.12           C  
ATOM     19  C   LYS A   6      42.775 -81.611  -4.214  1.00  6.57           C  
ATOM     20  O   LYS A   6      43.592 -80.727  -4.476  1.00  5.76           O  
ATOM     21  N   THR A   7      42.041 -82.232  -5.148  1.00  7.41           N  
ATOM     22  CA  THR A   7      42.165 -81.894  -6.566  1.00  7.48           C  
ATOM     23  C   THR A   7      40.981 -81.044  -7.035  1.00  8.75           C  
ATOM     24  O   THR A   7      39.936 -80.977  -6.388  1.00  8.58           O  
ATOM     25  N   LEU A   8      41.184 -80.410  -8.160  1.00  9.84           N  
ATOM     26  CA  LEU A   8      40.148 -79.552  -8.740  1.00 14.15           C  
ATOM     27  C   LEU A   8      38.904 -80.348  -9.125  1.00 17.37           C  
ATOM     28  O   LEU A   8      37.853 -79.762  -9.383  1.00 17.01           O  
ATOM     29  N   THR A   9      39.013 -81.679  -9.177  1.00 18.33           N  
ATOM     30  CA  THR A   9      37.863 -82.512  -9.550  1.00 19.24           C  
ATOM     31  C   THR A   9      37.123 -83.031  -8.319  1.00 19.48           C  
ATOM     32  O   THR A   9      36.126 -83.743  -8.438  1.00 23.14           O  
ATOM     33  N   GLY A  10      37.583 -82.623  -7.137  1.00 19.43           N  
ATOM     34  CA  GLY A  10      36.920 -83.004  -5.889  1.00 18.74           C  
ATOM     35  C   GLY A  10      37.482 -84.270  -5.252  1.00 17.62           C  
ATOM     36  O   GLY A  10      36.873 -84.847  -4.351  1.00 19.74           O  
ATOM     37  N   LYS A  11      38.648 -84.698  -5.729  1.00 13.56           N  
ATOM     38  CA  LYS A  11      39.270 -85.906  -5.184  1.00 11.91           C  
ATOM     39  C   LYS A  11      40.206 -85.550  -4.034  1.00 10.18           C  
ATOM     40  O   LYS A  11      40.912 -84.550  -4.112  1.00  9.10           O  
ATOM     41  N   THR A  12      40.246 -86.382  -2.986  1.00  9.63           N  
ATOM     42  CA  THR A  12      41.159 -86.126  -1.857  1.00  9.85           C  
ATOM     43  C   THR A  12      42.161 -87.275  -1.768  1.00 11.66           C  
ATOM     44  O   THR A  12      41.767 -88.439  -1.710  1.00 12.33           O  
ATOM     45  N   ILE A  13      43.457 -86.949  -1.738  1.00 10.42           N  
ATOM     46  CA  ILE A  13      44.502 -87.976  -1.632  1.00 11.84           C  
ATOM     47  C   ILE A  13      45.194 -87.878  -0.277  1.00 10.55           C  
ATOM     48  O   ILE A  13      45.495 -86.785   0.196  1.00 11.92           O  
ATOM     49  N   THR A  14      45.468 -89.035   0.333  1.00  9.39           N  
ATOM     50  CA  THR A  14      46.154 -89.071   1.624  1.00  9.63           C  
ATOM     51  C   THR A  14      47.609 -89.466   1.400  1.00 11.20           C  
ATOM     52  O   THR A  14      47.889 -90.434   0.694  1.00 11.63           O  
ATOM     53  N   LEU A  15      48.536 -88.710   1.990  1.00  8.29           N  
ATOM     54  CA  LEU A  15      49.967 -88.994   1.830  1.00  9.03           C  
ATOM     55  C   LEU A  15      50.654 -89.100   3.182  1.00  8.59           C  
ATOM     56  O   LEU A  15      50.286 -88.408   4.129  1.00  7.79           O  
ATOM     57  N   GLU A  16      51.705 -89.915   3.245  1.00 11.04           N  
ATOM     58  CA  GLU A  16      52.503 -90.042   4.462  1.00 11.50           C  
ATOM     59  C   GLU A  16      53.770 -89.234   4.223  1.00 10.13           C  
ATOM     60  O   GLU A  16      54.492 -89.474   3.255  1.00  9.83           O  
ATOM     61  N   VAL A  17      54.026 -88.254   5.085  1.00  8.99           N  
ATOM     62  CA  VAL A  17      55.199 -87.395   4.930  1.00  8.85           C  
ATOM     63  C   VAL A  17      55.851 -87.096   6.270  1.00  8.04           C  
ATOM     64  O   VAL A  17      55.271 -87.321   7.332  1.00  8.99           O  
ATOM     65  N   GLU A  18      57.051 -86.531   6.189  1.00  7.29           N  
ATOM     66  CA  GLU A  18      57.802 -86.118   7.373  1.00  7.08           C  
ATOM     67  C   GLU A  18      57.989 -84.599   7.285  1.00  6.45           C  
ATOM     68  O   GLU A  18      58.056 -84.070   6.176  1.00  5.28           O  
ATOM     69  N   PRO A  19      58.061 -83.864   8.375  1.00  7.24           N  
ATOM     70  CA  PRO A  19      58.224 -82.392   8.277  1.00  7.07           C  
ATOM     71  C   PRO A  19      59.467 -81.984   7.487  1.00  6.65           C  
ATOM     72  O   PRO A  19      59.533 -80.877   6.947  1.00  6.37           O  
ATOM     73  N   SER A  20      60.457 -82.878   7.439  1.00  6.80           N  
ATOM     74  CA  SER A  20      61.705 -82.602   6.734  1.00  6.28           C  
ATOM     75  C   SER A  20      61.607 -82.931   5.248  1.00  8.45           C  
ATOM     76  O   SER A  20      62.554 -82.689   4.501  1.00  7.26           O  
ATOM     77  N   ASP A  21      60.466 -83.455   4.802  1.00  7.50           N  
ATOM     78  CA  ASP A  21      60.306 -83.763   3.386  1.00  7.70           C  
ATOM     79  C   ASP A  21      60.189 -82.452   2.633  1.00  7.08           C  
ATOM     80  O   ASP A  21      59.546 -81.496   3.088  1.00  8.11           O  
ATOM     81  N   THR A  22      60.793 -82.442   1.441  1.00  5.37           N  
ATOM     82  CA  THR A  22      60.736 -81.280   0.576  1.00  6.01           C  
ATOM     83  C   THR A  22      59.485 -81.338  -0.283  1.00  8.01           C  
ATOM     84  O   THR A  22      58.925 -82.405  -0.520  1.00  8.11           O  
ATOM     85  N   ILE A  23      59.077 -80.178  -0.759  1.00  8.32           N  
ATOM     86  CA  ILE A  23      57.909 -80.069  -1.622  1.00  9.92           C  
ATOM     87  C   ILE A  23      58.131 -80.872  -2.907  1.00 10.01           C  
ATOM     88  O   ILE A  23      57.220 -81.548  -3.381  1.00  8.71           O  
ATOM     89  N   GLU A  24      59.346 -80.824  -3.454  1.00  9.54           N  
ATOM     90  CA  GLU A  24      59.651 -81.591  -4.666  1.00 11.81           C  
ATOM     91  C   GLU A  24      59.433 -83.072  -4.376  1.00 11.14           C  
ATOM     92  O   GLU A  24      58.951 -83.815  -5.228  1.00 10.62           O  
ATOM     93  N   ASN A  25      59.789 -83.490  -3.169  1.00  9.43           N  
ATOM     94  CA  ASN A  25      59.616 -84.889  -2.791  1.00 10.96           C  
ATOM     95  C   ASN A  25      58.127 -85.219  -2.729  1.00  9.68           C  
ATOM     96  O   ASN A  25      57.698 -86.267  -3.208  1.00  9.33           O  
ATOM     97  N   VAL A  26      57.340 -84.313  -2.151  1.00  6.52           N  
ATOM     98  CA  VAL A  26      55.899 -84.526  -2.059  1.00  5.53           C  
ATOM     99  C   VAL A  26      55.311 -84.650  -3.465  1.00  4.42           C  
ATOM    100  O   VAL A  26      54.466 -85.513  -3.712  1.00  3.40           O  
ATOM    101  N   LYS A  27      55.769 -83.803  -4.400  1.00  2.64           N  
ATOM    102  CA  LYS A  27      55.281 -83.863  -5.773  1.00  4.14           C  
ATOM    103  C   LYS A  27      55.587 -85.237  -6.358  1.00  5.58           C  
ATOM    104  O   LYS A  27      54.783 -85.805  -7.092  1.00  4.11           O  
ATOM    105  N   ALA A  28      56.774 -85.750  -6.040  1.00  6.61           N  
ATOM    106  CA  ALA A  28      57.193 -87.045  -6.557  1.00  7.74           C  
ATOM    107  C   ALA A  28      56.262 -88.145  -6.062  1.00  9.17           C  
ATOM    108  O   ALA A  28      55.925 -89.064  -6.807  1.00 11.45           O  
ATOM    109  N   LYS A  29      55.828 -88.037  -4.814  1.00  8.96           N  
ATOM    110  CA  LYS A  29      54.914 -89.027  -4.260  1.00  7.90           C  
ATOM    111  C   LYS A  29      53.578 -88.968  -5.005  1.00  6.92           C  
ATOM    112  O   LYS A  29      52.986 -90.000  -5.310  1.00  6.87           O  
ATOM    113  N   ILE A  30      53.132 -87.744  -5.338  1.00  4.57           N  
ATOM    114  CA  ILE A  30      51.887 -87.555  -6.090  1.00  5.58           C  
ATOM    115  C   ILE A  30      52.035 -88.153  -7.494  1.00  7.26           C  
ATOM    116  O   ILE A  30      51.106 -88.772  -8.001  1.00  9.46           O  
ATOM    117  N   GLN A  31      53.198 -87.975  -8.118  1.00  7.06           N  
ATOM    118  CA  GLN A  31      53.424 -88.519  -9.460  1.00  8.67           C  
ATOM    119  C   GLN A  31      53.267 -90.032  -9.424  1.00 10.90           C  
ATOM    120  O   GLN A  31      52.659 -90.635 -10.309  1.00  9.63           O  
ATOM    121  N   ASP A  32      53.846 -90.626  -8.405  1.00 10.93           N  
ATOM    122  CA  ASP A  32      53.795 -92.072  -8.265  1.00 14.01           C  
ATOM    123  C   ASP A  32      52.352 -92.558  -8.142  1.00 14.04           C  
ATOM    124  O   ASP A  32      51.992 -93.604  -8.681  1.00 13.39           O  
ATOM    125  N   LYS A  33      51.542 -91.815  -7.390  1.00 14.22           N  
ATOM    126  CA  LYS A  33      50.151 -92.202  -7.152  1.00 14.00           C  
ATOM    127  C   LYS A  33      49.189 -91.824  -8.291  1.00 12.37           C  
ATOM    128  O   LYS A  33      48.257 -92.578  -8.573  1.00 12.17           O  
ATOM    129  N   GLU A  34      49.340 -90.629  -8.875  1.00 10.11           N  
ATOM    130  CA  GLU A  34      48.383 -90.151  -9.896  1.00 10.07           C  
ATOM    131  C   GLU A  34      48.920 -90.053 -11.331  1.00  9.32           C  
ATOM    132  O   GLU A  34      48.141 -89.963 -12.280  1.00 11.61           O  
ATOM    133  N   GLY A  35      50.236 -90.109 -11.492  1.00  7.22           N  
ATOM    134  CA  GLY A  35      50.835 -90.063 -12.831  1.00  6.29           C  
ATOM    135  C   GLY A  35      50.975 -88.640 -13.382  1.00  6.93           C  
ATOM    136  O   GLY A  35      51.266 -88.445 -14.563  1.00  7.41           O  
ATOM    137  N   ILE A  36      50.765 -87.658 -12.519  1.00  5.86           N  
ATOM    138  CA  ILE A  36      50.866 -86.252 -12.924  1.00  6.07           C  
ATOM    139  C   ILE A  36      52.333 -85.789 -12.823  1.00  6.36           C  
ATOM    140  O   ILE A  36      52.882 -85.770 -11.722  1.00  6.18           O  
ATOM    141  N   PRO A  37      52.996 -85.417 -13.909  1.00  8.65           N  
ATOM    142  CA  PRO A  37      54.422 -84.964 -13.828  1.00  9.18           C  
ATOM    143  C   PRO A  37      54.601 -83.738 -12.895  1.00  9.85           C  
ATOM    144  O   PRO A  37      53.816 -82.792 -12.966  1.00  8.51           O  
ATOM    145  N   PRO A  38      55.607 -83.734 -12.019  1.00  8.71           N  
ATOM    146  CA  PRO A  38      55.855 -82.593 -11.067  1.00  9.08           C  
ATOM    147  C   PRO A  38      55.868 -81.201 -11.722  1.00  9.28           C  
ATOM    148  O   PRO A  38      55.502 -80.223 -11.072  1.00  6.50           O  
ATOM    149  N   ASP A  39      56.305 -81.085 -12.964  1.00 11.20           N  
ATOM    150  CA  ASP A  39      56.363 -79.769 -13.602  1.00 14.96           C  
ATOM    151  C   ASP A  39      54.975 -79.221 -13.919  1.00 13.99           C  
ATOM    152  O   ASP A  39      54.821 -78.029 -14.186  1.00 13.75           O  
ATOM    153  N   GLN A  40      53.963 -80.087 -13.897  1.00 11.60           N  
ATOM    154  CA  GLN A  40      52.592 -79.660 -14.196  1.00 10.76           C  
ATOM    155  C   GLN A  40      51.774 -79.449 -12.923  1.00  8.01           C  
ATOM    156  O   GLN A  40      50.576 -79.172 -12.989  1.00  8.96           O  
ATOM    157  N   GLN A  41      52.408 -79.624 -11.768  1.00  6.52           N  
ATOM    158  CA  GLN A  41      51.706 -79.497 -10.485  1.00  3.87           C  
ATOM    159  C   GLN A  41      52.067 -78.233  -9.699  1.00  4.79           C  
ATOM    160  O   GLN A  41      53.235 -77.861  -9.586  1.00  6.34           O  
ATOM    161  N   ARG A  42      51.035 -77.626  -9.100  1.00  5.73           N  
ATOM    162  CA  ARG A  42      51.195 -76.446  -8.243  1.00  6.97           C  
ATOM    163  C   ARG A  42      50.525 -76.736  -6.901  1.00  7.15           C  
ATOM    164  O   ARG A  42      49.348 -77.085  -6.861  1.00  7.33           O  
ATOM    165  N   LEU A  43      51.265 -76.609  -5.802  1.00  4.65           N  
ATOM    166  CA  LEU A  43      50.719 -76.878  -4.464  1.00  3.51           C  
ATOM    167  C   LEU A  43      50.510 -75.579  -3.692  1.00  5.56           C  
ATOM    168  O   LEU A  43      51.398 -74.730  -3.619  1.00  4.19           O  
ATOM    169  N   ILE A  44      49.314 -75.444  -3.117  1.00  4.58           N  
ATOM    170  CA  ILE A  44      48.952 -74.256  -2.340  1.00  5.55           C  
ATOM    171  C   ILE A  44      48.514 -74.653  -0.929  1.00  5.46           C  
ATOM    172  O   ILE A  44      47.772 -75.622  -0.741  1.00  6.04           O  
ATOM    173  N   PHE A  45      48.947 -73.857   0.049  1.00  6.75           N  
ATOM    174  CA  PHE A  45      48.572 -74.071   1.445  1.00  4.70           C  
ATOM    175  C   PHE A  45      48.249 -72.728   2.082  1.00  6.34           C  
ATOM    176  O   PHE A  45      49.051 -71.795   2.029  1.00  5.45           O  
ATOM    177  N   ALA A  46      47.073 -72.636   2.682  1.00  6.53           N  
ATOM    178  CA  ALA A  46      46.642 -71.407   3.330  1.00  7.15           C  
ATOM    179  C   ALA A  46      46.824 -70.193   2.418  1.00  9.00           C  
ATOM    180  O   ALA A  46      47.168 -69.104   2.877  1.00 11.15           O  
ATOM    181  N   GLY A  47      46.528 -70.379   1.129  1.00  9.35           N  
ATOM    182  CA  GLY A  47      46.595 -69.277   0.168  1.00 11.68           C  
ATOM    183  C   GLY A  47      47.995 -68.995  -0.387  1.00 11.14           C  
ATOM    184  O   GLY A  47      48.152 -68.072  -1.186  1.00 13.93           O  
ATOM    185  N   LYS A  48      49.019 -69.750   0.032  1.00 10.47           N  
ATOM    186  CA  LYS A  48      50.390 -69.502  -0.454  1.00  8.82           C  
ATOM    187  C   LYS A  48      50.898 -70.651  -1.329  1.00  7.68           C  
ATOM    188  O   LYS A  48      50.706 -71.821  -1.001  1.00  6.47           O  
ATOM    189  N   GLN A  49      51.590 -70.308  -2.420  1.00  8.89           N  
ATOM    190  CA  GLN A  49      52.161 -71.332  -3.297  1.00  7.18           C  
ATOM    191  C   GLN A  49      53.442 -71.852  -2.652  1.00  8.23           C  
ATOM    192  O   GLN A  49      54.303 -71.069  -2.251  1.00  9.70           O  
ATOM    193  N   LEU A  50      53.564 -73.170  -2.546  1.00  6.51           N  
ATOM    194  CA  LEU A  50      54.748 -73.773  -1.939  1.00  7.41           C  
ATOM    195  C   LEU A  50      55.857 -73.978  -2.974  1.00  8.27           C  
ATOM    196  O   LEU A  50      55.599 -74.403  -4.099  1.00  8.34           O  
ATOM    197  N   GLU A  51      57.094 -73.652  -2.584  1.00  9.43           N  
ATOM    198  CA  GLU A  51      58.241 -73.784  -3.498  1.00 11.90           C  
ATOM    199  C   GLU A  51      58.889 -75.167  -3.390  1.00 11.49           C  
ATOM    200  O   GLU A  51      58.833 -75.816  -2.345  1.00  9.88           O  
ATOM    201  N   ASP A  52      59.458 -75.626  -4.517  1.00 12.71           N  
ATOM    202  CA  ASP A  52      60.062 -76.958  -4.594  1.00 16.56           C  
ATOM    203  C   ASP A  52      61.357 -77.099  -3.779  1.00 15.83           C  
ATOM    204  O   ASP A  52      61.761 -78.218  -3.463  1.00 17.21           O  
ATOM    205  N   GLY A  53      62.014 -75.993  -3.445  1.00 15.00           N  
ATOM    206  CA  GLY A  53      63.269 -76.059  -2.673  1.00 11.77           C  
ATOM    207  C   GLY A  53      63.041 -75.882  -1.166  1.00 11.10           C  
ATOM    208  O   GLY A  53      64.001 -75.799  -0.400  1.00 11.25           O  
ATOM    209  N   ARG A  54      61.783 -75.821  -0.746  1.00  8.53           N  
ATOM    210  CA  ARG A  54      61.459 -75.647   0.684  1.00  9.05           C  
ATOM    211  C   ARG A  54      60.794 -76.903   1.272  1.00  8.96           C  
ATOM    212  O   ARG A  54      60.342 -77.778   0.531  1.00 11.60           O  
ATOM    213  N   THR A  55      60.755 -76.996   2.619  1.00  9.05           N  
ATOM    214  CA  THR A  55      60.155 -78.163   3.300  1.00  9.03           C  
ATOM    215  C   THR A  55      58.795 -77.846   3.913  1.00  8.15           C  
ATOM    216  O   THR A  55      58.413 -76.691   4.068  1.00  5.91           O  
ATOM    217  N   LEU A  56      58.088 -78.918   4.286  1.00  6.91           N  
ATOM    218  CA  LEU A  56      56.773 -78.783   4.921  1.00  8.29           C  
ATOM    219  C   LEU A  56      56.881 -77.991   6.222  1.00  8.05           C  
ATOM    220  O   LEU A  56      56.024 -77.154   6.508  1.00 10.17           O  
ATOM    221  N   SER A  57      57.918 -78.259   7.026  1.00  8.92           N  
ATOM    222  CA  SER A  57      58.062 -77.549   8.294  1.00  9.00           C  
ATOM    223  C   SER A  57      58.221 -76.045   8.088  1.00  9.44           C  
ATOM    224  O   SER A  57      57.801 -75.252   8.930  1.00 10.91           O  
ATOM    225  N   ASP A  58      58.822 -75.655   6.978  1.00  9.11           N  
ATOM    226  CA  ASP A  58      59.019 -74.237   6.698  1.00  7.91           C  
ATOM    227  C   ASP A  58      57.674 -73.520   6.584  1.00  9.12           C  
ATOM    228  O   ASP A  58      57.575 -72.329   6.876  1.00  8.61           O  
ATOM    229  N   TYR A  59      56.636 -74.250   6.156  1.00  7.97           N  
ATOM    230  CA  TYR A  59      55.298 -73.660   6.009  1.00  8.45           C  
ATOM    231  C   TYR A  59      54.405 -73.981   7.208  1.00 10.98           C  
ATOM    232  O   TYR A  59      53.189 -73.799   7.149  1.00 12.95           O  
ATOM    233  N   ASN A  60      55.014 -74.452   8.302  1.00 12.38           N  
ATOM    234  CA  ASN A  60      54.294 -74.794   9.528  1.00 13.94           C  
ATOM    235  C   ASN A  60      53.093 -75.698   9.258  1.00 14.16           C  
ATOM    236  O   ASN A  60      52.047 -75.555   9.890  1.00 14.26           O  
ATOM    237  N   ILE A  61      53.257 -76.647   8.344  1.00 11.08           N  
ATOM    238  CA  ILE A  61      52.180 -77.588   8.038  1.00 11.78           C  
ATOM    239  C   ILE A  61      52.195 -78.688   9.098  1.00 13.74           C  
ATOM    240  O   ILE A  61      53.226 -79.318   9.335  1.00 14.60           O  
ATOM    241  N   GLN A  62      51.052 -78.881   9.775  1.00 13.97           N  
ATOM    242  CA  GLN A  62      50.938 -79.867  10.859  1.00 15.52           C  
ATOM    243  C   GLN A  62      50.124 -81.092  10.440  1.00 13.94           C  
ATOM    244  O   GLN A  62      49.500 -81.113   9.378  1.00 12.15           O  
ATOM    245  N   LYS A  63      50.170 -82.122  11.287  1.00 11.73           N  
ATOM    246  CA  LYS A  63      49.454 -83.356  10.970  1.00 11.97           C  
ATOM    247  C   LYS A  63      47.995 -83.080  10.611  1.00 10.41           C  
ATOM    248  O   LYS A  63      47.346 -82.211  11.192  1.00  9.59           O  
ATOM    249  N   GLU A  64      47.510 -83.826   9.624  1.00 10.04           N  
ATOM    250  CA  GLU A  64      46.142 -83.694   9.123  1.00 10.94           C  
ATOM    251  C   GLU A  64      45.896 -82.363   8.424  1.00  9.74           C  
ATOM    252  O   GLU A  64      44.747 -81.950   8.267  1.00  9.42           O  
ATOM    253  N   SER A  65      46.950 -81.729   7.935  1.00  6.85           N  
ATOM    254  CA  SER A  65      46.805 -80.496   7.175  1.00  6.90           C  
ATOM    255  C   SER A  65      46.336 -80.860   5.773  1.00  4.72           C  
ATOM    256  O   SER A  65      46.665 -81.929   5.259  1.00  3.91           O  
ATOM    257  N   THR A  66      45.567 -79.963   5.147  1.00  4.48           N  
ATOM    258  CA  THR A  66      45.060 -80.200   3.793  1.00  3.80           C  
ATOM    259  C   THR A  66      45.747 -79.250   2.811  1.00  4.60           C  
ATOM    260  O   THR A  66      45.728 -78.031   2.981  1.00  5.33           O  
ATOM    261  N   LEU A  67      46.315 -79.836   1.761  1.00  4.17           N  
ATOM    262  CA  LEU A  67      46.978 -79.085   0.697  1.00  3.85           C  
ATOM    263  C   LEU A  67      46.059 -79.086  -0.518  1.00  3.80           C  
ATOM    264  O   LEU A  67      45.204 -79.955  -0.668  1.00  5.54           O  
ATOM    265  N   HIS A  68      46.254 -78.099  -1.392  1.00  2.94           N  
ATOM    266  CA  HIS A  68      45.460 -77.984  -2.613  1.00  4.17           C  
ATOM    267  C   HIS A  68      46.374 -78.155  -3.819  1.00  5.32           C  
ATOM    268  O   HIS A  68      47.441 -77.543  -3.892  1.00  7.70           O  
ATOM    269  N   LEU A  69      45.955 -78.995  -4.765  1.00  5.29           N  
ATOM    270  CA  LEU A  69      46.741 -79.253  -5.972  1.00  3.97           C  
ATOM    271  C   LEU A  69      46.088 -78.572  -7.168  1.00  5.07           C  
ATOM    272  O   LEU A  69      44.881 -78.688  -7.378  1.00  4.34           O  
ATOM    273  N   VAL A  70      46.907 -77.869  -7.971  1.00  4.29           N  
ATOM    274  CA  VAL A  70      46.461 -77.171  -9.173  1.00  6.26           C  
ATOM    275  C   VAL A  70      47.259 -77.712 -10.353  1.00  9.22           C  
ATOM    276  O   VAL A  70      48.464 -77.930 -10.263  1.00  9.36           O  
TER
ENDMDL
MODEL      3
ATOM      1  N   GLN A   2      49.502 -88.353   7.985  1.00  9.27           N  
ATOM      2  CA  GLN A   2      48.610 -88.190   6.839  1.00  9.07           C  
ATOM      3  C   GLN A   2      48.346 -86.712   6.590  1.00  8.72           C  
ATOM      4  O   GLN A   2      48.166 -85.925   7.523  1.00  8.22           O  
ATOM      5  N   ILE A   3      48.301 -86.353   5.301  1.00  5.87           N  
ATOM      6  CA  ILE A   3      48.032 -84.982   4.877  1.00  5.07           C  
ATOM      7  C   ILE A   3      46.932 -84.992   3.814  1.00  4.01           C  
ATOM      8  O   ILE A   3      46.605 -86.047   3.260  1.00  4.61           O  
ATOM      9  N   PHE A   4      46.370 -83.810   3.524  1.00  4.55           N  
ATOM     10  CA  PHE A   4      45.309 -83.696   2.513  1.00  4.68           C  
ATOM     11  C   PHE A   4      45.667 -82.668   1.441  1.00  5.30           C  
ATOM     12  O   PHE A   4      46.172 -81.596   1.746  1.00  5.58           O  
ATOM     13  N   VAL A   5      45.358 -82.993   0.183  1.00  4.44           N  
ATOM     14  CA  VAL A   5      45.602 -82.066  -0.932  1.00  3.87           C  
ATOM     15  C   VAL A   5      44.282 -81.801  -1.644  1.00  4.93           C  
ATOM     16  O   VAL A   5      43.620 -82.732  -2.098  1.00  6.84           O  
ATOM     17  N   LYS A   6      43.911 -80.527  -1.765  1.00  6.04           N  
ATOM     18  CA  LYS A   6      42.670 -80.163  -2.456  1.00  6.12           C  
ATOM     19  C   LYS A   6      42.981 -79.702  -3.879  1.00  6.57           C  
ATOM     20  O   LYS A   6      43.961 -78.990  -4.112  1.00  5.76           O  
ATOM     21  N   THR A   7      42.131 -80.108  -4.833  1.00  7.41           N  
ATOM     22  CA  THR A   7      42.311 -79.727  -6.233  1.00  7.48           C  
ATOM     23  C   THR A   7      41.390 -78.567  -6.599  1.00  8.75           C  
ATOM     24  O   THR A   7      40.473 -78.200  -5.864  1.00  8.58           O  
ATOM     25  N   LEU A   8      41.673 -78.020  -7.754  1.00  9.84           N  
ATOM     26  CA  LEU A   8      40.896 -76.896  -8.273  1.00 14.15           C  
ATOM     27  C   LEU A   8      39.455 -77.308  -8.549  1.00 17.37           C  
ATOM     28  O   LEU A   8      38.572 -76.455  -8.649  1.00 17.01           O  
ATOM     29  N   THR A   9      39.213 -78.614  -8.702  1.00 18.33           N  
ATOM     30  CA  THR A   9      37.862 -79.096  -9.000  1.00 19.24           C  
ATOM     31  C   THR A   9      37.094 -79.487  -7.740  1.00 19.48           C  
ATOM     32  O   THR A   9      35.927 -79.873  -7.810  1.00 23.14           O  
ATOM     33  N   GLY A  10      37.740 -79.339  -6.582  1.00 19.43           N  
ATOM     34  CA  GLY A  10      37.087 -79.632  -5.304  1.00 18.74           C  
ATOM     35  C   GLY A  10      37.333 -81.052  -4.797  1.00 17.62           C  
ATOM     36  O   GLY A  10      36.647 -81.527  -3.892  1.00 19.74           O  
ATOM     37  N   LYS A  11      38.325 -81.720  -5.386  1.00 13.56           N  
ATOM     38  CA  LYS A  11      38.649 -83.087  -4.967  1.00 11.91           C  
ATOM     39  C   LYS A  11      39.685 -83.058  -3.851  1.00 10.18           C  
ATOM     40  O   LYS A  11      40.583 -82.224  -3.879  1.00  9.10           O  
ATOM     41  N   THR A  12      39.592 -83.980  -2.885  1.00  9.63           N  
ATOM     42  CA  THR A  12      40.581 -84.032  -1.794  1.00  9.85           C  
ATOM     43  C   THR A  12      41.307 -85.374  -1.835  1.00 11.66           C  
ATOM     44  O   THR A  12      40.671 -86.428  -1.852  1.00 12.33           O  
ATOM     45  N   ILE A  13      42.643 -85.335  -1.825  1.00 10.42           N  
ATOM     46  CA  ILE A  13      43.445 -86.564  -1.835  1.00 11.84           C  
ATOM     47  C   ILE A  13      44.170 -86.723  -0.504  1.00 10.55           C  
ATOM     48  O   ILE A  13      44.712 -85.760   0.034  1.00 11.92           O  
ATOM     49  N   THR A  14      44.198 -87.955   0.010  1.00  9.39           N  
ATOM     50  CA  THR A  14      44.887 -88.240   1.269  1.00  9.63           C  
ATOM     51  C   THR A  14      46.210 -88.927   0.960  1.00 11.20           C  
ATOM     52  O   THR A  14      46.248 -89.877   0.178  1.00 11.63           O  
ATOM     53  N   LEU A  15      47.298 -88.443   1.562  1.00  8.29           N  
ATOM     54  CA  LEU A  15      48.624 -89.028   1.320  1.00  9.03           C  
ATOM     55  C   LEU A  15      49.308 -89.381   2.631  1.00  8.59           C  
ATOM     56  O   LEU A  15      49.134 -88.691   3.634  1.00  7.79           O  
ATOM     57  N   GLU A  16      50.152 -90.414   2.595  1.00 11.04           N  
ATOM     58  CA  GLU A  16      50.936 -90.800   3.769  1.00 11.50           C  
ATOM     59  C   GLU A  16      52.335 -90.226   3.554  1.00 10.13           C  
ATOM     60  O   GLU A  16      52.982 -90.514   2.547  1.00  9.83           O  
ATOM     61  N   VAL A  17      52.789 -89.390   4.488  1.00  8.99           N  
ATOM     62  CA  VAL A  17      54.102 -88.756   4.367  1.00  8.85           C  
ATOM     63  C   VAL A  17      54.824 -88.704   5.705  1.00  8.04           C  
ATOM     64  O   VAL A  17      54.229 -88.891   6.766  1.00  8.99           O  
ATOM     65  N   GLU A  18      56.114 -88.391   5.624  1.00  7.29           N  
ATOM     66  CA  GLU A  18      56.961 -88.240   6.808  1.00  7.08           C  
ATOM     67  C   GLU A  18      57.470 -86.794   6.827  1.00  6.45           C  
ATOM     68  O   GLU A  18      57.614 -86.198   5.759  1.00  5.28           O  
ATOM     69  N   PRO A  19      57.735 -86.186   7.966  1.00  7.24           N  
ATOM     70  CA  PRO A  19      58.209 -84.778   7.976  1.00  7.07           C  
ATOM     71  C   PRO A  19      59.494 -84.567   7.175  1.00  6.65           C  
ATOM     72  O   PRO A  19      59.772 -83.455   6.722  1.00  6.37           O  
ATOM     73  N   SER A  20      60.285 -85.631   7.023  1.00  6.80           N  
ATOM     74  CA  SER A  20      61.550 -85.540   6.298  1.00  6.28           C  
ATOM     75  C   SER A  20      61.360 -85.728   4.797  1.00  8.45           C  
ATOM     76  O   SER A  20      62.321 -85.625   4.034  1.00  7.26           O  
ATOM     77  N   ASP A  21      60.128 -85.977   4.359  1.00  7.50           N  
ATOM     78  CA  ASP A  21      59.875 -86.136   2.934  1.00  7.70           C  
ATOM     79  C   ASP A  21      60.036 -84.779   2.279  1.00  7.08           C  
ATOM     80  O   ASP A  21      59.658 -83.738   2.833  1.00  8.11           O  
ATOM     81  N   THR A  22      60.575 -84.822   1.060  1.00  5.37           N  
ATOM     82  CA  THR A  22      60.763 -83.623   0.269  1.00  6.01           C  
ATOM     83  C   THR A  22      59.499 -83.327  -0.520  1.00  8.01           C  
ATOM     84  O   THR A  22      58.711 -84.222  -0.812  1.00  8.11           O  
ATOM     85  N   ILE A  23      59.339 -82.074  -0.888  1.00  8.32           N  
ATOM     86  CA  ILE A  23      58.196 -81.653  -1.682  1.00  9.92           C  
ATOM     87  C   ILE A  23      58.204 -82.404  -3.013  1.00 10.01           C  
ATOM     88  O   ILE A  23      57.155 -82.825  -3.496  1.00  8.71           O  
ATOM     89  N   GLU A  24      59.391 -82.599  -3.591  1.00  9.54           N  
ATOM     90  CA  GLU A  24      59.499 -83.341  -4.848  1.00 11.81           C  
ATOM     91  C   GLU A  24      58.956 -84.756  -4.641  1.00 11.14           C  
ATOM     92  O   GLU A  24      58.285 -85.298  -5.513  1.00 10.62           O  
ATOM     93  N   ASN A  25      59.246 -85.345  -3.481  1.00  9.43           N  
ATOM     94  CA  ASN A  25      58.750 -86.695  -3.205  1.00 10.96           C  
ATOM     95  C   ASN A  25      57.225 -86.668  -3.124  1.00  9.68           C  
ATOM     96  O   ASN A  25      56.557 -87.568  -3.625  1.00  9.33           O  
ATOM     97  N   VAL A  26      56.680 -85.626  -2.497  1.00  6.52           N  
ATOM     98  CA  VAL A  26      55.230 -85.504  -2.375  1.00  5.53           C  
ATOM     99  C   VAL A  26      54.605 -85.385  -3.762  1.00  4.42           C  
ATOM    100  O   VAL A  26      53.599 -86.037  -4.048  1.00  3.40           O  
ATOM    101  N   LYS A  27      55.205 -84.567  -4.639  1.00  2.64           N  
ATOM    102  CA  LYS A  27      54.692 -84.406  -5.993  1.00  4.14           C  
ATOM    103  C   LYS A  27      54.706 -85.759  -6.703  1.00  5.58           C  
ATOM    104  O   LYS A  27      53.788 -86.088  -7.450  1.00  4.11           O  
ATOM    105  N   ALA A  28      55.770 -86.525  -6.472  1.00  6.61           N  
ATOM    106  CA  ALA A  28      55.910 -87.830  -7.107  1.00  7.74           C  
ATOM    107  C   ALA A  28      54.790 -88.766  -6.665  1.00  9.17           C  
ATOM    108  O   ALA A  28      54.266 -89.539  -7.466  1.00 11.45           O  
ATOM    109  N   LYS A  29      54.416 -88.679  -5.398  1.00  8.96           N  
ATOM    110  CA  LYS A  29      53.338 -89.509  -4.874  1.00  7.90           C  
ATOM    111  C   LYS A  29      52.019 -89.127  -5.547  1.00  6.92           C  
ATOM    112  O   LYS A  29      51.225 -89.993  -5.904  1.00  6.87           O  
ATOM    113  N   ILE A  30      51.818 -87.820  -5.767  1.00  4.57           N  
ATOM    114  CA  ILE A  30      50.619 -87.330  -6.450  1.00  5.58           C  
ATOM    115  C   ILE A  30      50.612 -87.832  -7.897  1.00  7.26           C  
ATOM    116  O   ILE A  30      49.569 -88.221  -8.412  1.00  9.46           O  
ATOM    117  N   GLN A  31      51.773 -87.837  -8.545  1.00  7.06           N  
ATOM    118  CA  GLN A  31      51.871 -88.314  -9.927  1.00  8.67           C  
ATOM    119  C   GLN A  31      51.428 -89.770  -9.998  1.00 10.90           C  
ATOM    120  O   GLN A  31      50.709 -90.179 -10.910  1.00  9.63           O  
ATOM    121  N   ASP A  32      51.898 -90.541  -9.042  1.00 10.93           N  
ATOM    122  CA  ASP A  32      51.582 -91.961  -9.007  1.00 14.01           C  
ATOM    123  C   ASP A  32      50.072 -92.172  -8.902  1.00 14.04           C  
ATOM    124  O   ASP A  32      49.516 -93.086  -9.510  1.00 13.39           O  
ATOM    125  N   LYS A  33      49.427 -91.351  -8.075  1.00 14.22           N  
ATOM    126  CA  LYS A  33      47.990 -91.479  -7.830  1.00 14.00           C  
ATOM    127  C   LYS A  33      47.101 -90.826  -8.903  1.00 12.37           C  
ATOM    128  O   LYS A  33      46.029 -91.350  -9.206  1.00 12.17           O  
ATOM    129  N   GLU A  34      47.482 -89.644  -9.401  1.00 10.11           N  
ATOM    130  CA  GLU A  34      46.623 -88.899 -10.349  1.00 10.07           C  
ATOM    131  C   GLU A  34      47.142 -88.787 -11.789  1.00  9.32           C  
ATOM    132  O   GLU A  34      46.383 -88.450 -12.698  1.00 11.61           O  
ATOM    133  N   GLY A  35      48.414 -89.096 -12.002  1.00  7.22           N  
ATOM    134  CA  GLY A  35      48.984 -89.051 -13.353  1.00  6.29           C  
ATOM    135  C   GLY A  35      49.377 -87.635 -13.792  1.00  6.93           C  
ATOM    136  O   GLY A  35      49.681 -87.397 -14.961  1.00  7.41           O  
ATOM    137  N   ILE A  36      49.360 -86.709 -12.845  1.00  5.86           N  
ATOM    138  CA  ILE A  36      49.711 -85.315 -13.133  1.00  6.07           C  
ATOM    139  C   ILE A  36      51.241 -85.135 -13.056  1.00  6.36           C  
ATOM    140  O   ILE A  36      51.813 -85.327 -11.983  1.00  6.18           O  
ATOM    141  N   PRO A  37      51.934 -84.780 -14.132  1.00  8.65           N  
ATOM    142  CA  PRO A  37      53.421 -84.605 -14.067  1.00  9.18           C  
ATOM    143  C   PRO A  37      53.847 -83.516 -13.048  1.00  9.85           C  
ATOM    144  O   PRO A  37      53.180 -82.487 -12.937  1.00  8.51           O  
ATOM    145  N   PRO A  38      54.931 -83.719 -12.297  1.00  8.71           N  
ATOM    146  CA  PRO A  38      55.409 -82.718 -11.273  1.00  9.08           C  
ATOM    147  C   PRO A  38      55.677 -81.304 -11.823  1.00  9.28           C  
ATOM    148  O   PRO A  38      55.525 -80.329 -11.087  1.00  6.50           O  
ATOM    149  N   ASP A  39      56.101 -81.175 -13.071  1.00 11.20           N  
ATOM    150  CA  ASP A  39      56.403 -79.846 -13.614  1.00 14.96           C  
ATOM    151  C   ASP A  39      55.145 -79.010 -13.843  1.00 13.99           C  
ATOM    152  O   ASP A  39      55.231 -77.793 -14.009  1.00 13.75           O  
ATOM    153  N   GLN A  40      53.979 -79.654 -13.862  1.00 11.60           N  
ATOM    154  CA  GLN A  40      52.720 -78.933 -14.086  1.00 10.76           C  
ATOM    155  C   GLN A  40      51.974 -78.667 -12.778  1.00  8.01           C  
ATOM    156  O   GLN A  40      50.857 -78.149 -12.788  1.00  8.96           O  
ATOM    157  N   GLN A  41      52.577 -79.055 -11.661  1.00  6.52           N  
ATOM    158  CA  GLN A  41      51.939 -78.888 -10.348  1.00  3.87           C  
ATOM    159  C   GLN A  41      52.571 -77.788  -9.491  1.00  4.79           C  
ATOM    160  O   GLN A  41      53.793 -77.670  -9.403  1.00  6.34           O  
ATOM    161  N   ARG A  42      51.706 -77.037  -8.803  1.00  5.73           N  
ATOM    162  CA  ARG A  42      52.133 -75.991  -7.869  1.00  6.97           C  
ATOM    163  C   ARG A  42      51.458 -76.256  -6.521  1.00  7.15           C  
ATOM    164  O   ARG A  42      50.235 -76.321  -6.441  1.00  7.33           O  
ATOM    165  N   LEU A  43      52.250 -76.415  -5.462  1.00  4.65           N  
ATOM    166  CA  LEU A  43      51.709 -76.680  -4.122  1.00  3.51           C  
ATOM    167  C   LEU A  43      51.808 -75.437  -3.248  1.00  5.56           C  
ATOM    168  O   LEU A  43      52.858 -74.802  -3.156  1.00  4.19           O  
ATOM    169  N   ILE A  44      50.686 -75.099  -2.613  1.00  4.58           N  
ATOM    170  CA  ILE A  44      50.606 -73.929  -1.739  1.00  5.55           C  
ATOM    171  C   ILE A  44      50.140 -74.333  -0.342  1.00  5.46           C  
ATOM    172  O   ILE A  44      49.202 -75.117  -0.181  1.00  6.04           O  
ATOM    173  N   PHE A  45      50.789 -73.746   0.660  1.00  6.75           N  
ATOM    174  CA  PHE A  45      50.437 -73.986   2.055  1.00  4.70           C  
ATOM    175  C   PHE A  45      50.497 -72.669   2.813  1.00  6.34           C  
ATOM    176  O   PHE A  45      51.505 -71.963   2.777  1.00  5.45           O  
ATOM    177  N   ALA A  46      49.414 -72.346   3.498  1.00  6.53           N  
ATOM    178  CA  ALA A  46      49.338 -71.116   4.268  1.00  7.15           C  
ATOM    179  C   ALA A  46      49.763 -69.906   3.437  1.00  9.00           C  
ATOM    180  O   ALA A  46      50.382 -68.973   3.948  1.00 11.15           O  
ATOM    181  N   GLY A  47      49.370 -69.909   2.161  1.00  9.35           N  
ATOM    182  CA  GLY A  47      49.657 -68.780   1.275  1.00 11.68           C  
ATOM    183  C   GLY A  47      51.060 -68.792   0.664  1.00 11.14           C  
ATOM    184  O   GLY A  47      51.404 -67.873  -0.079  1.00 13.93           O  
ATOM    185  N   LYS A  48      51.887 -69.800   0.976  1.00 10.47           N  
ATOM    186  CA  LYS A  48      53.258 -69.849   0.436  1.00  8.82           C  
ATOM    187  C   LYS A  48      53.442 -71.009  -0.545  1.00  7.68           C  
ATOM    188  O   LYS A  48      52.975 -72.121  -0.302  1.00  6.47           O  
ATOM    189  N   GLN A  49      54.158 -70.744  -1.638  1.00  8.89           N  
ATOM    190  CA  GLN A  49      54.439 -71.779  -2.634  1.00  7.18           C  
ATOM    191  C   GLN A  49      55.575 -72.650  -2.094  1.00  8.23           C  
ATOM    192  O   GLN A  49      56.609 -72.132  -1.674  1.00  9.70           O  
ATOM    193  N   LEU A  50      55.381 -73.968  -2.089  1.00  6.51           N  
ATOM    194  CA  LEU A  50      56.408 -74.881  -1.576  1.00  7.41           C  
ATOM    195  C   LEU A  50      57.420 -75.249  -2.665  1.00  8.27           C  
ATOM    196  O   LEU A  50      57.048 -75.519  -3.807  1.00  8.34           O  
ATOM    197  N   GLU A  51      58.711 -75.239  -2.299  1.00  9.43           N  
ATOM    198  CA  GLU A  51      59.780 -75.556  -3.261  1.00 11.90           C  
ATOM    199  C   GLU A  51      60.141 -77.047  -3.254  1.00 11.49           C  
ATOM    200  O   GLU A  51      60.015 -77.724  -2.237  1.00  9.88           O  
ATOM    201  N   ASP A  52      60.564 -77.540  -4.427  1.00 12.71           N  
ATOM    202  CA  ASP A  52      60.910 -78.960  -4.591  1.00 16.56           C  
ATOM    203  C   ASP A  52      62.162 -79.384  -3.801  1.00 15.83           C  
ATOM    204  O   ASP A  52      62.352 -80.574  -3.548  1.00 17.21           O  
ATOM    205  N   GLY A  53      63.021 -78.439  -3.428  1.00 15.00           N  
ATOM    206  CA  GLY A  53      64.252 -78.777  -2.688  1.00 11.77           C  
ATOM    207  C   GLY A  53      64.086 -78.693  -1.162  1.00 11.10           C  
ATOM    208  O   GLY A  53      65.050 -78.912  -0.428  1.00 11.25           O  
ATOM    209  N   ARG A  54      62.885 -78.390  -0.685  1.00  8.53           N  
ATOM    210  CA  ARG A  54      62.644 -78.298   0.773  1.00  9.05           C  
ATOM    211  C   ARG A  54      61.746 -79.448   1.268  1.00  8.96           C  
ATOM    212  O   ARG A  54      61.127 -80.146   0.466  1.00 11.60           O  
ATOM    213  N   THR A  55      61.683 -79.641   2.606  1.00  9.05           N  
ATOM    214  CA  THR A  55      60.851 -80.708   3.206  1.00  9.03           C  
ATOM    215  C   THR A  55      59.609 -80.150   3.903  1.00  8.15           C  
ATOM    216  O   THR A  55      59.494 -78.951   4.153  1.00  5.91           O  
ATOM    217  N   LEU A  56      58.696 -81.071   4.231  1.00  6.91           N  
ATOM    218  CA  LEU A  56      57.454 -80.714   4.930  1.00  8.29           C  
ATOM    219  C   LEU A  56      57.752 -80.067   6.281  1.00  8.05           C  
ATOM    220  O   LEU A  56      57.088 -79.102   6.662  1.00 10.17           O  
ATOM    221  N   SER A  57      58.727 -80.599   7.025  1.00  8.92           N  
ATOM    222  CA  SER A  57      59.030 -80.034   8.338  1.00  9.00           C  
ATOM    223  C   SER A  57      59.466 -78.573   8.242  1.00  9.44           C  
ATOM    224  O   SER A  57      59.212 -77.786   9.155  1.00 10.91           O  
ATOM    225  N   ASP A  58      60.115 -78.209   7.150  1.00  9.11           N  
ATOM    226  CA  ASP A  58      60.564 -76.829   6.981  1.00  7.91           C  
ATOM    227  C   ASP A  58      59.380 -75.862   6.965  1.00  9.12           C  
ATOM    228  O   ASP A  58      59.518 -74.703   7.354  1.00  8.61           O  
ATOM    229  N   TYR A  59      58.215 -76.336   6.509  1.00  7.97           N  
ATOM    230  CA  TYR A  59      57.018 -75.485   6.447  1.00  8.45           C  
ATOM    231  C   TYR A  59      56.095 -75.723   7.639  1.00 10.98           C  
ATOM    232  O   TYR A  59      54.945 -75.282   7.639  1.00 12.95           O  
ATOM    233  N   ASN A  60      56.602 -76.415   8.659  1.00 12.38           N  
ATOM    234  CA  ASN A  60      55.841 -76.713   9.867  1.00 13.94           C  
ATOM    235  C   ASN A  60      54.472 -77.310   9.549  1.00 14.16           C  
ATOM    236  O   ASN A  60      53.484 -77.006  10.216  1.00 14.26           O  
ATOM    237  N   ILE A  61      54.426 -78.188   8.550  1.00 11.08           N  
ATOM    238  CA  ILE A  61      53.174 -78.848   8.187  1.00 11.78           C  
ATOM    239  C   ILE A  61      52.967 -80.010   9.154  1.00 13.74           C  
ATOM    240  O   ILE A  61      53.834 -80.873   9.293  1.00 14.60           O  
ATOM    241  N   GLN A  62      51.831 -79.999   9.866  1.00 13.97           N  
ATOM    242  CA  GLN A  62      51.525 -81.021  10.875  1.00 15.52           C  
ATOM    243  C   GLN A  62      50.445 -81.992  10.402  1.00 13.94           C  
ATOM    244  O   GLN A  62      49.803 -81.785   9.371  1.00 12.15           O  
ATOM    245  N   LYS A  63      50.280 -83.070  11.169  1.00 11.73           N  
ATOM    246  CA  LYS A  63      49.297 -84.081  10.800  1.00 11.97           C  
ATOM    247  C   LYS A  63      47.929 -83.462  10.529  1.00 10.41           C  
ATOM    248  O   LYS A  63      47.508 -82.519  11.199  1.00  9.59           O  
ATOM    249  N   GLU A  64      47.261 -84.001   9.514  1.00 10.04           N  
ATOM    250  CA  GLU A  64      45.946 -83.528   9.086  1.00 10.94           C  
ATOM    251  C   GLU A  64      45.989 -82.123   8.499  1.00  9.74           C  
ATOM    252  O   GLU A  64      44.960 -81.452   8.424  1.00  9.42           O  
ATOM    253  N   SER A  65      47.147 -81.703   8.013  1.00  6.85           N  
ATOM    254  CA  SER A  65      47.270 -80.410   7.356  1.00  6.90           C  
ATOM    255  C   SER A  65      46.700 -80.539   5.952  1.00  4.72           C  
ATOM    256  O   SER A  65      46.774 -81.605   5.341  1.00  3.91           O  
ATOM    257  N   THR A  66      46.138 -79.442   5.430  1.00  4.48           N  
ATOM    258  CA  THR A  66      45.567 -79.434   4.083  1.00  3.80           C  
ATOM    259  C   THR A  66      46.390 -78.513   3.182  1.00  4.60           C  
ATOM    260  O   THR A  66      46.539 -77.323   3.458  1.00  5.33           O  
ATOM    261  N   LEU A  67      46.879 -79.073   2.078  1.00  4.17           N  
ATOM    262  CA  LEU A  67      47.641 -78.307   1.093  1.00  3.85           C  
ATOM    263  C   LEU A  67      46.729 -78.050  -0.092  1.00  3.80           C  
ATOM    264  O   LEU A  67      45.745 -78.762  -0.302  1.00  5.54           O  
ATOM    265  N   HIS A  68      47.072 -77.029  -0.879  1.00  2.94           N  
ATOM    266  CA  HIS A  68      46.300 -76.669  -2.065  1.00  4.17           C  
ATOM    267  C   HIS A  68      47.148 -76.910  -3.307  1.00  5.32           C  
ATOM    268  O   HIS A  68      48.310 -76.510  -3.360  1.00  7.70           O  
ATOM    269  N   LEU A  69      46.563 -77.563  -4.309  1.00  5.29           N  
ATOM    270  CA  LEU A  69      47.274 -77.853  -5.556  1.00  3.97           C  
ATOM    271  C   LEU A  69      46.746 -76.955  -6.670  1.00  5.07           C  
ATOM    272  O   LEU A  69      45.536 -76.796  -6.833  1.00  4.34           O  
ATOM    273  N   VAL A  70      47.674 -76.382  -7.455  1.00  4.29           N  
ATOM    274  CA  VAL A  70      47.363 -75.509  -8.584  1.00  6.26           C  
ATOM    275  C   VAL A  70      47.941 -76.156  -9.835  1.00  9.22           C  
ATOM    276  O   VAL A  70      49.027 -76.733  -9.814  1.00  9.36           O  
TER
ENDMDL
MODEL      4
ATOM      1  N   GLN A   2      49.558 -88.108   8.255  1.00  9.27           N  
ATOM      2  CA  GLN A   2      48.622 -87.893   7.152  1.00  9.07           C  
ATOM      3  C   GLN A   2      48.443 -86.406   6.891  1.00  8.72           C  
ATOM      4  O   GLN A   2      48.345 -85.597   7.819  1.00  8.22           O  
ATOM      5  N   ILE A   3      48.361 -86.063   5.601  1.00  5.87           N  
ATOM      6  CA  ILE A   3      48.148 -84.687   5.169  1.00  5.07           C  
ATOM      7  C   ILE A   3      47.000 -84.658   4.162  1.00  4.01           C  
ATOM      8  O   ILE A   3      46.574 -85.704   3.665  1.00  4.61           O  
ATOM      9  N   PHE A   4      46.498 -83.456   3.870  1.00  4.55           N  
ATOM     10  CA  PHE A   4      45.386 -83.304   2.923  1.00  4.68           C  
ATOM     11  C   PHE A   4      45.733 -82.309   1.821  1.00  5.30           C  
ATOM     12  O   PHE A   4      46.300 -81.262   2.086  1.00  5.58           O  
ATOM     13  N   VAL A   5      45.355 -82.637   0.581  1.00  4.44           N  
ATOM     14  CA  VAL A   5      45.600 -81.739  -0.558  1.00  3.87           C  
ATOM     15  C   VAL A   5      44.267 -81.369  -1.200  1.00  4.93           C  
ATOM     16  O   VAL A   5      43.500 -82.244  -1.598  1.00  6.84           O  
ATOM     17  N   LYS A   6      44.001 -80.067  -1.328  1.00  6.04           N  
ATOM     18  CA  LYS A   6      42.762 -79.600  -1.958  1.00  6.12           C  
ATOM     19  C   LYS A   6      43.034 -79.181  -3.405  1.00  6.57           C  
ATOM     20  O   LYS A   6      44.052 -78.557  -3.699  1.00  5.76           O  
ATOM     21  N   THR A   7      42.102 -79.518  -4.303  1.00  7.41           N  
ATOM     22  CA  THR A   7      42.241 -79.159  -5.716  1.00  7.48           C  
ATOM     23  C   THR A   7      41.357 -77.963  -6.060  1.00  8.75           C  
ATOM     24  O   THR A   7      40.439 -77.599  -5.326  1.00  8.58           O  
ATOM     25  N   LEU A   8      41.665 -77.384  -7.197  1.00  9.84           N  
ATOM     26  CA  LEU A   8      40.934 -76.235  -7.702  1.00 14.15           C  
ATOM     27  C   LEU A   8      39.459 -76.578  -7.909  1.00 17.37           C  
ATOM     28  O   LEU A   8      38.621 -75.681  -8.004  1.00 17.01           O  
ATOM     29  N   THR A   9      39.142 -77.870  -8.015  1.00 18.33           N  
ATOM     30  CA  THR A   9      37.756 -78.284  -8.253  1.00 19.24           C  
ATOM     31  C   THR A   9      37.018 -78.611  -6.957  1.00 19.48           C  
ATOM     32  O   THR A   9      35.861 -79.030  -6.979  1.00 23.14           O  
ATOM     33  N   GLY A  10      37.681 -78.367  -5.828  1.00 19.43           N  
ATOM     34  CA  GLY A  10      37.065 -78.582  -4.520  1.00 18.74           C  
ATOM     35  C   GLY A  10      37.218 -80.005  -3.992  1.00 17.62           C  
ATOM     36  O   GLY A  10      36.547 -80.402  -3.040  1.00 19.74           O  
ATOM     37  N   LYS A  11      38.112 -80.767  -4.618  1.00 13.56           N  
ATOM     38  CA  LYS A  11      38.337 -82.148  -4.185  1.00 11.91           C  
ATOM     39  C   LYS A  11      39.431 -82.195  -3.127  1.00 10.18           C  
ATOM     40  O   LYS A  11      40.416 -81.473  -3.238  1.00  9.10           O  
ATOM     41  N   THR A  12      39.284 -83.064  -2.120  1.00  9.63           N  
ATOM     42  CA  THR A  12      40.319 -83.190  -1.083  1.00  9.85           C  
ATOM     43  C   THR A  12      40.904 -84.597  -1.137  1.00 11.66           C  
ATOM     44  O   THR A  12      40.169 -85.583  -1.083  1.00 12.33           O  
ATOM     45  N   ILE A  13      42.232 -84.688  -1.220  1.00 10.42           N  
ATOM     46  CA  ILE A  13      42.908 -85.988  -1.254  1.00 11.84           C  
ATOM     47  C   ILE A  13      43.693 -86.192   0.036  1.00 10.55           C  
ATOM     48  O   ILE A  13      44.356 -85.276   0.519  1.00 11.92           O  
ATOM     49  N   THR A  14      43.631 -87.411   0.578  1.00  9.39           N  
ATOM     50  CA  THR A  14      44.363 -87.734   1.802  1.00  9.63           C  
ATOM     51  C   THR A  14      45.607 -88.525   1.430  1.00 11.20           C  
ATOM     52  O   THR A  14      45.528 -89.482   0.659  1.00 11.63           O  
ATOM     53  N   LEU A  15      46.759 -88.116   1.959  1.00  8.29           N  
ATOM     54  CA  LEU A  15      48.020 -88.794   1.649  1.00  9.03           C  
ATOM     55  C   LEU A  15      48.745 -89.191   2.926  1.00  8.59           C  
ATOM     56  O   LEU A  15      48.683 -88.481   3.930  1.00  7.79           O  
ATOM     57  N   GLU A  16      49.499 -90.289   2.861  1.00 11.04           N  
ATOM     58  CA  GLU A  16      50.310 -90.723   3.997  1.00 11.50           C  
ATOM     59  C   GLU A  16      51.734 -90.287   3.687  1.00 10.13           C  
ATOM     60  O   GLU A  16      52.292 -90.657   2.654  1.00  9.83           O  
ATOM     61  N   VAL A  17      52.311 -89.475   4.567  1.00  8.99           N  
ATOM     62  CA  VAL A  17      53.664 -88.966   4.354  1.00  8.85           C  
ATOM     63  C   VAL A  17      54.458 -88.947   5.649  1.00  8.04           C  
ATOM     64  O   VAL A  17      53.908 -89.064   6.744  1.00  8.99           O  
ATOM     65  N   GLU A  18      55.760 -88.737   5.496  1.00  7.29           N  
ATOM     66  CA  GLU A  18      56.670 -88.625   6.633  1.00  7.08           C  
ATOM     67  C   GLU A  18      57.272 -87.217   6.594  1.00  6.45           C  
ATOM     68  O   GLU A  18      57.431 -86.666   5.505  1.00  5.28           O  
ATOM     69  N   PRO A  19      57.593 -86.590   7.707  1.00  7.24           N  
ATOM     70  CA  PRO A  19      58.147 -85.215   7.660  1.00  7.07           C  
ATOM     71  C   PRO A  19      59.396 -85.110   6.785  1.00  6.65           C  
ATOM     72  O   PRO A  19      59.726 -84.032   6.290  1.00  6.37           O  
ATOM     73  N   SER A  20      60.093 -86.231   6.612  1.00  6.80           N  
ATOM     74  CA  SER A  20      61.314 -86.251   5.810  1.00  6.28           C  
ATOM     75  C   SER A  20      61.018 -86.434   4.324  1.00  8.45           C  
ATOM     76  O   SER A  20      61.939 -86.434   3.508  1.00  7.26           O  
ATOM     77  N   ASP A  21      59.744 -86.564   3.957  1.00  7.50           N  
ATOM     78  CA  ASP A  21      59.400 -86.712   2.547  1.00  7.70           C  
ATOM     79  C   ASP A  21      59.637 -85.379   1.858  1.00  7.08           C  
ATOM     80  O   ASP A  21      59.386 -84.303   2.415  1.00  8.11           O  
ATOM     81  N   THR A  22      60.098 -85.482   0.610  1.00  5.37           N  
ATOM     82  CA  THR A  22      60.347 -84.311  -0.211  1.00  6.01           C  
ATOM     83  C   THR A  22      59.072 -83.893  -0.931  1.00  8.01           C  
ATOM     84  O   THR A  22      58.173 -84.701  -1.142  1.00  8.11           O  
ATOM     85  N   ILE A  23      59.021 -82.629  -1.322  1.00  8.32           N  
ATOM     86  CA  ILE A  23      57.868 -82.097  -2.049  1.00  9.92           C  
ATOM     87  C   ILE A  23      57.698 -82.844  -3.373  1.00 10.01           C  
ATOM     88  O   ILE A  23      56.581 -83.189  -3.757  1.00  8.71           O  
ATOM     89  N   GLU A  24      58.810 -83.127  -4.047  1.00  9.54           N  
ATOM     90  CA  GLU A  24      58.765 -83.877  -5.303  1.00 11.81           C  
ATOM     91  C   GLU A  24      58.167 -85.257  -5.043  1.00 11.14           C  
ATOM     92  O   GLU A  24      57.439 -85.790  -5.874  1.00 10.62           O  
ATOM     93  N   ASN A  25      58.489 -85.831  -3.884  1.00  9.43           N  
ATOM     94  CA  ASN A  25      57.976 -87.155  -3.533  1.00 10.96           C  
ATOM     95  C   ASN A  25      56.471 -87.083  -3.314  1.00  9.68           C  
ATOM     96  O   ASN A  25      55.731 -87.937  -3.796  1.00  9.33           O  
ATOM     97  N   VAL A  26      56.015 -86.056  -2.600  1.00  6.52           N  
ATOM     98  CA  VAL A  26      54.586 -85.903  -2.362  1.00  5.53           C  
ATOM     99  C   VAL A  26      53.888 -85.772  -3.711  1.00  4.42           C  
ATOM    100  O   VAL A  26      52.836 -86.375  -3.930  1.00  3.40           O  
ATOM    101  N   LYS A  27      54.492 -85.014  -4.637  1.00  2.64           N  
ATOM    102  CA  LYS A  27      53.931 -84.860  -5.973  1.00  4.14           C  
ATOM    103  C   LYS A  27      53.835 -86.226  -6.657  1.00  5.58           C  
ATOM    104  O   LYS A  27      52.868 -86.509  -7.356  1.00  4.11           O  
ATOM    105  N   ALA A  28      54.860 -87.056  -6.463  1.00  6.61           N  
ATOM    106  CA  ALA A  28      54.885 -88.377  -7.082  1.00  7.74           C  
ATOM    107  C   ALA A  28      53.731 -89.223  -6.564  1.00  9.17           C  
ATOM    108  O   ALA A  28      53.111 -89.970  -7.319  1.00 11.45           O  
ATOM    109  N   LYS A  29      53.430 -89.086  -5.281  1.00  8.96           N  
ATOM    110  CA  LYS A  29      52.326 -89.828  -4.694  1.00  7.90           C  
ATOM    111  C   LYS A  29      51.009 -89.356  -5.306  1.00  6.92           C  
ATOM    112  O   LYS A  29      50.134 -90.162  -5.603  1.00  6.87           O  
ATOM    113  N   ILE A  30      50.901 -88.041  -5.547  1.00  4.57           N  
ATOM    114  CA  ILE A  30      49.711 -87.467  -6.179  1.00  5.58           C  
ATOM    115  C   ILE A  30      49.591 -87.987  -7.614  1.00  7.26           C  
ATOM    116  O   ILE A  30      48.495 -88.296  -8.068  1.00  9.46           O  
ATOM    117  N   GLN A  31      50.714 -88.089  -8.322  1.00  7.06           N  
ATOM    118  CA  GLN A  31      50.697 -88.584  -9.700  1.00  8.67           C  
ATOM    119  C   GLN A  31      50.135 -89.999  -9.716  1.00 10.90           C  
ATOM    120  O   GLN A  31      49.334 -90.361 -10.577  1.00  9.63           O  
ATOM    121  N   ASP A  32      50.593 -90.787  -8.770  1.00 10.93           N  
ATOM    122  CA  ASP A  32      50.164 -92.173  -8.687  1.00 14.01           C  
ATOM    123  C   ASP A  32      48.649 -92.254  -8.497  1.00 14.04           C  
ATOM    124  O   ASP A  32      47.987 -93.127  -9.058  1.00 13.39           O  
ATOM    125  N   LYS A  33      48.119 -91.367  -7.656  1.00 14.22           N  
ATOM    126  CA  LYS A  33      46.690 -91.368  -7.337  1.00 14.00           C  
ATOM    127  C   LYS A  33      45.805 -90.655  -8.374  1.00 12.37           C  
ATOM    128  O   LYS A  33      44.671 -91.080  -8.600  1.00 12.17           O  
ATOM    129  N   GLU A  34      46.264 -89.524  -8.924  1.00 10.11           N  
ATOM    130  CA  GLU A  34      45.421 -88.722  -9.838  1.00 10.07           C  
ATOM    131  C   GLU A  34      45.864 -88.683 -11.306  1.00  9.32           C  
ATOM    132  O   GLU A  34      45.080 -88.316 -12.181  1.00 11.61           O  
ATOM    133  N   GLY A  35      47.098 -89.086 -11.579  1.00  7.22           N  
ATOM    134  CA  GLY A  35      47.592 -89.113 -12.959  1.00  6.29           C  
ATOM    135  C   GLY A  35      48.069 -87.742 -13.453  1.00  6.93           C  
ATOM    136  O   GLY A  35      48.324 -87.551 -14.641  1.00  7.41           O  
ATOM    137  N   ILE A  36      48.181 -86.799 -12.528  1.00  5.86           N  
ATOM    138  CA  ILE A  36      48.624 -85.444 -12.870  1.00  6.07           C  
ATOM    139  C   ILE A  36      50.166 -85.391 -12.889  1.00  6.36           C  
ATOM    140  O   ILE A  36      50.786 -85.604 -11.848  1.00  6.18           O  
ATOM    141  N   PRO A  37      50.817 -85.130 -14.018  1.00  8.65           N  
ATOM    142  CA  PRO A  37      52.316 -85.089 -14.055  1.00  9.18           C  
ATOM    143  C   PRO A  37      52.915 -84.019 -13.103  1.00  9.85           C  
ATOM    144  O   PRO A  37      52.416 -82.895 -13.049  1.00  8.51           O  
ATOM    145  N   PRO A  38      53.968 -84.343 -12.347  1.00  8.71           N  
ATOM    146  CA  PRO A  38      54.614 -83.374 -11.388  1.00  9.08           C  
ATOM    147  C   PRO A  38      55.003 -82.012 -11.998  1.00  9.28           C  
ATOM    148  O   PRO A  38      55.004 -81.008 -11.286  1.00  6.50           O  
ATOM    149  N   ASP A  39      55.359 -81.960 -13.277  1.00 11.20           N  
ATOM    150  CA  ASP A  39      55.768 -80.687 -13.882  1.00 14.96           C  
ATOM    151  C   ASP A  39      54.590 -79.738 -14.068  1.00 13.99           C  
ATOM    152  O   ASP A  39      54.780 -78.537 -14.261  1.00 13.75           O  
ATOM    153  N   GLN A  40      53.374 -80.272 -14.019  1.00 11.60           N  
ATOM    154  CA  GLN A  40      52.179 -79.446 -14.196  1.00 10.76           C  
ATOM    155  C   GLN A  40      51.542 -79.101 -12.856  1.00  8.01           C  
ATOM    156  O   GLN A  40      50.483 -78.476 -12.804  1.00  8.96           O  
ATOM    157  N   GLN A  41      52.172 -79.552 -11.775  1.00  6.52           N  
ATOM    158  CA  GLN A  41      51.636 -79.329 -10.431  1.00  3.87           C  
ATOM    159  C   GLN A  41      52.409 -78.288  -9.631  1.00  4.79           C  
ATOM    160  O   GLN A  41      53.640 -78.283  -9.611  1.00  6.34           O  
ATOM    161  N   ARG A  42      51.657 -77.450  -8.916  1.00  5.73           N  
ATOM    162  CA  ARG A  42      52.238 -76.438  -8.035  1.00  6.97           C  
ATOM    163  C   ARG A  42      51.624 -76.612  -6.649  1.00  7.15           C  
ATOM    164  O   ARG A  42      50.405 -76.562  -6.498  1.00  7.33           O  
ATOM    165  N   LEU A  43      52.462 -76.829  -5.637  1.00  4.65           N  
ATOM    166  CA  LEU A  43      51.986 -77.025  -4.263  1.00  3.51           C  
ATOM    167  C   LEU A  43      52.202 -75.762  -3.442  1.00  5.56           C  
ATOM    168  O   LEU A  43      53.285 -75.178  -3.443  1.00  4.19           O  
ATOM    169  N   ILE A  44      51.135 -75.331  -2.767  1.00  4.58           N  
ATOM    170  CA  ILE A  44      51.170 -74.111  -1.960  1.00  5.55           C  
ATOM    171  C   ILE A  44      50.672 -74.363  -0.541  1.00  5.46           C  
ATOM    172  O   ILE A  44      49.667 -75.047  -0.329  1.00  6.04           O  
ATOM    173  N   PHE A  45      51.382 -73.779   0.426  1.00  6.75           N  
ATOM    174  CA  PHE A  45      51.023 -73.903   1.837  1.00  4.70           C  
ATOM    175  C   PHE A  45      51.204 -72.563   2.540  1.00  6.34           C  
ATOM    176  O   PHE A  45      52.255 -71.931   2.437  1.00  5.45           O  
ATOM    177  N   ALA A  46      50.178 -72.149   3.267  1.00  6.53           N  
ATOM    178  CA  ALA A  46      50.219 -70.898   4.006  1.00  7.15           C  
ATOM    179  C   ALA A  46      50.676 -69.735   3.131  1.00  9.00           C  
ATOM    180  O   ALA A  46      51.401 -68.848   3.582  1.00 11.15           O  
ATOM    181  N   GLY A  47      50.193 -69.721   1.888  1.00  9.35           N  
ATOM    182  CA  GLY A  47      50.501 -68.628   0.972  1.00 11.68           C  
ATOM    183  C   GLY A  47      51.877 -68.733   0.315  1.00 11.14           C  
ATOM    184  O   GLY A  47      52.253 -67.841  -0.447  1.00 13.93           O  
ATOM    185  N   LYS A  48      52.651 -69.786   0.613  1.00 10.47           N  
ATOM    186  CA  LYS A  48      53.999 -69.925   0.037  1.00  8.82           C  
ATOM    187  C   LYS A  48      54.090 -71.116  -0.918  1.00  7.68           C  
ATOM    188  O   LYS A  48      53.572 -72.195  -0.630  1.00  6.47           O  
ATOM    189  N   GLN A  49      54.775 -70.916  -2.044  1.00  8.89           N  
ATOM    190  CA  GLN A  49      54.954 -71.992  -3.019  1.00  7.18           C  
ATOM    191  C   GLN A  49      56.059 -72.925  -2.515  1.00  8.23           C  
ATOM    192  O   GLN A  49      57.148 -72.470  -2.164  1.00  9.70           O  
ATOM    193  N   LEU A  50      55.775 -74.228  -2.469  1.00  6.51           N  
ATOM    194  CA  LEU A  50      56.757 -75.206  -1.991  1.00  7.41           C  
ATOM    195  C   LEU A  50      57.671 -75.677  -3.126  1.00  8.27           C  
ATOM    196  O   LEU A  50      57.213 -75.933  -4.240  1.00  8.34           O  
ATOM    197  N   GLU A  51      58.977 -75.768  -2.833  1.00  9.43           N  
ATOM    198  CA  GLU A  51      59.960 -76.186  -3.846  1.00 11.90           C  
ATOM    199  C   GLU A  51      60.216 -77.697  -3.825  1.00 11.49           C  
ATOM    200  O   GLU A  51      60.062 -78.357  -2.799  1.00  9.88           O  
ATOM    201  N   ASP A  52      60.569 -78.228  -5.001  1.00 12.71           N  
ATOM    202  CA  ASP A  52      60.802 -79.668  -5.154  1.00 16.56           C  
ATOM    203  C   ASP A  52      62.058 -80.166  -4.422  1.00 15.83           C  
ATOM    204  O   ASP A  52      62.184 -81.363  -4.165  1.00 17.21           O  
ATOM    205  N   GLY A  53      62.988 -79.273  -4.098  1.00 15.00           N  
ATOM    206  CA  GLY A  53      64.227 -79.680  -3.411  1.00 11.77           C  
ATOM    207  C   GLY A  53      64.136 -79.554  -1.884  1.00 11.10           C  
ATOM    208  O   GLY A  53      65.118 -79.811  -1.187  1.00 11.25           O  
ATOM    209  N   ARG A  54      62.976 -79.170  -1.362  1.00  8.53           N  
ATOM    210  CA  ARG A  54      62.807 -79.032   0.101  1.00  9.05           C  
ATOM    211  C   ARG A  54      61.883 -80.128   0.668  1.00  8.96           C  
ATOM    212  O   ARG A  54      61.164 -80.799  -0.081  1.00 11.60           O  
ATOM    213  N   THR A  55      61.908 -80.303   2.010  1.00  9.05           N  
ATOM    214  CA  THR A  55      61.066 -81.317   2.683  1.00  9.03           C  
ATOM    215  C   THR A  55      59.900 -80.681   3.444  1.00  8.15           C  
ATOM    216  O   THR A  55      59.869 -79.476   3.686  1.00  5.91           O  
ATOM    217  N   LEU A  56      58.955 -81.544   3.844  1.00  6.91           N  
ATOM    218  CA  LEU A  56      57.786 -81.099   4.617  1.00  8.29           C  
ATOM    219  C   LEU A  56      58.218 -80.456   5.937  1.00  8.05           C  
ATOM    220  O   LEU A  56      57.667 -79.429   6.333  1.00 10.17           O  
ATOM    221  N   SER A  57      59.184 -81.067   6.638  1.00  8.92           N  
ATOM    222  CA  SER A  57      59.617 -80.513   7.921  1.00  9.00           C  
ATOM    223  C   SER A  57      60.171 -79.099   7.774  1.00  9.44           C  
ATOM    224  O   SER A  57      60.041 -78.281   8.685  1.00 10.91           O  
ATOM    225  N   ASP A  58      60.789 -78.813   6.645  1.00  9.11           N  
ATOM    226  CA  ASP A  58      61.354 -77.488   6.427  1.00  7.91           C  
ATOM    227  C   ASP A  58      60.264 -76.419   6.470  1.00  9.12           C  
ATOM    228  O   ASP A  58      60.530 -75.268   6.815  1.00  8.61           O  
ATOM    229  N   TYR A  59      59.032 -76.801   6.117  1.00  7.97           N  
ATOM    230  CA  TYR A  59      57.909 -75.854   6.120  1.00  8.45           C  
ATOM    231  C   TYR A  59      57.046 -75.998   7.372  1.00 10.98           C  
ATOM    232  O   TYR A  59      55.928 -75.486   7.423  1.00 12.95           O  
ATOM    233  N   ASN A  60      57.567 -76.696   8.385  1.00 12.38           N  
ATOM    234  CA  ASN A  60      56.850 -76.910   9.638  1.00 13.94           C  
ATOM    235  C   ASN A  60      55.430 -77.426   9.400  1.00 14.16           C  
ATOM    236  O   ASN A  60      54.495 -77.045  10.103  1.00 14.26           O  
ATOM    237  N   ILE A  61      55.279 -78.319   8.425  1.00 11.08           N  
ATOM    238  CA  ILE A  61      53.969 -78.903   8.140  1.00 11.78           C  
ATOM    239  C   ILE A  61      53.735 -80.036   9.137  1.00 13.74           C  
ATOM    240  O   ILE A  61      54.552 -80.950   9.254  1.00 14.60           O  
ATOM    241  N   GLN A  62      52.633 -79.942   9.895  1.00 13.97           N  
ATOM    242  CA  GLN A  62      52.302 -80.924  10.937  1.00 15.52           C  
ATOM    243  C   GLN A  62      51.121 -81.815  10.541  1.00 13.94           C  
ATOM    244  O   GLN A  62      50.446 -81.576   9.539  1.00 12.15           O  
ATOM    245  N   LYS A  63      50.912 -82.863  11.338  1.00 11.73           N  
ATOM    246  CA  LYS A  63      49.831 -83.802  11.040  1.00 11.97           C  
ATOM    247  C   LYS A  63      48.501 -83.081  10.830  1.00 10.41           C  
ATOM    248  O   LYS A  63      48.194 -82.098  11.505  1.00  9.59           O  
ATOM    249  N   GLU A  64      47.730 -83.585   9.867  1.00 10.04           N  
ATOM    250  CA  GLU A  64      46.428 -83.016   9.511  1.00 10.94           C  
ATOM    251  C   GLU A  64      46.549 -81.632   8.887  1.00  9.74           C  
ATOM    252  O   GLU A  64      45.577 -80.878   8.857  1.00  9.42           O  
ATOM    253  N   SER A  65      47.706 -81.324   8.320  1.00  6.85           N  
ATOM    254  CA  SER A  65      47.898 -80.063   7.620  1.00  6.90           C  
ATOM    255  C   SER A  65      47.249 -80.182   6.250  1.00  4.72           C  
ATOM    256  O   SER A  65      47.210 -81.265   5.665  1.00  3.91           O  
ATOM    257  N   THR A  66      46.744 -79.059   5.731  1.00  4.48           N  
ATOM    258  CA  THR A  66      46.102 -79.042   4.416  1.00  3.80           C  
ATOM    259  C   THR A  66      46.974 -78.275   3.421  1.00  4.60           C  
ATOM    260  O   THR A  66      47.327 -77.117   3.643  1.00  5.33           O  
ATOM    261  N   LEU A  67      47.279 -78.934   2.307  1.00  4.17           N  
ATOM    262  CA  LEU A  67      48.069 -78.348   1.225  1.00  3.85           C  
ATOM    263  C   LEU A  67      47.110 -77.992   0.096  1.00  3.80           C  
ATOM    264  O   LEU A  67      46.014 -78.538  -0.003  1.00  5.54           O  
ATOM    265  N   HIS A  68      47.544 -77.067  -0.762  1.00  2.94           N  
ATOM    266  CA  HIS A  68      46.741 -76.636  -1.903  1.00  4.17           C  
ATOM    267  C   HIS A  68      47.462 -77.006  -3.195  1.00  5.32           C  
ATOM    268  O   HIS A  68      48.654 -76.733  -3.347  1.00  7.70           O  
ATOM    269  N   LEU A  69      46.737 -77.625  -4.128  1.00  5.29           N  
ATOM    270  CA  LEU A  69      47.313 -78.031  -5.412  1.00  3.97           C  
ATOM    271  C   LEU A  69      46.782 -77.129  -6.514  1.00  5.07           C  
ATOM    272  O   LEU A  69      45.578 -76.889  -6.612  1.00  4.34           O  
ATOM    273  N   VAL A  70      47.697 -76.645  -7.363  1.00  4.29           N  
ATOM    274  CA  VAL A  70      47.367 -75.784  -8.493  1.00  6.26           C  
ATOM    275  C   VAL A  70      47.830 -76.481  -9.766  1.00  9.22           C  
ATOM    276  O   VAL A  70      48.899 -77.091  -9.814  1.00  9.36           O  
TER
ENDMDL
MODEL      5
ATOM      1  N   GLN A   2      50.273 -87.975   8.361  1.00  9.27           N  
ATOM      2  CA  GLN A   2      49.411 -88.007   7.178  1.00  9.07           C  
ATOM      3  C   GLN A   2      48.888 -86.612   6.866  1.00  8.72           C  
ATOM      4  O   GLN A   2      48.544 -85.841   7.765  1.00  8.22           O  
ATOM      5  N   ILE A   3      48.804 -86.316   5.569  1.00  5.87           N  
ATOM      6  CA  ILE A   3      48.293 -85.035   5.091  1.00  5.07           C  
ATOM      7  C   ILE A   3      47.236 -85.287   4.018  1.00  4.01           C  
ATOM      8  O   ILE A   3      47.099 -86.408   3.523  1.00  4.61           O  
ATOM      9  N   PHE A   4      46.492 -84.237   3.659  1.00  4.55           N  
ATOM     10  CA  PHE A   4      45.446 -84.359   2.635  1.00  4.68           C  
ATOM     11  C   PHE A   4      45.659 -83.344   1.517  1.00  5.30           C  
ATOM     12  O   PHE A   4      45.967 -82.192   1.777  1.00  5.58           O  
ATOM     13  N   VAL A   5      45.450 -83.774   0.268  1.00  4.44           N  
ATOM     14  CA  VAL A   5      45.575 -82.871  -0.885  1.00  3.87           C  
ATOM     15  C   VAL A   5      44.246 -82.848  -1.635  1.00  4.93           C  
ATOM     16  O   VAL A   5      43.754 -83.890  -2.060  1.00  6.84           O  
ATOM     17  N   LYS A   6      43.679 -81.656  -1.826  1.00  6.04           N  
ATOM     18  CA  LYS A   6      42.414 -81.528  -2.562  1.00  6.12           C  
ATOM     19  C   LYS A   6      42.677 -81.087  -4.002  1.00  6.57           C  
ATOM     20  O   LYS A   6      43.553 -80.260  -4.259  1.00  5.76           O  
ATOM     21  N   THR A   7      41.899 -81.646  -4.942  1.00  7.41           N  
ATOM     22  CA  THR A   7      42.039 -81.307  -6.360  1.00  7.48           C  
ATOM     23  C   THR A   7      40.945 -80.340  -6.804  1.00  8.75           C  
ATOM     24  O   THR A   7      39.976 -80.070  -6.094  1.00  8.58           O  
ATOM     25  N   LEU A   8      41.150 -79.850  -8.001  1.00  9.84           N  
ATOM     26  CA  LEU A   8      40.213 -78.909  -8.612  1.00 14.15           C  
ATOM     27  C   LEU A   8      38.863 -79.569  -8.877  1.00 17.37           C  
ATOM     28  O   LEU A   8      37.857 -78.878  -9.039  1.00 17.01           O  
ATOM     29  N   THR A   9      38.837 -80.904  -8.953  1.00 18.33           N  
ATOM     30  CA  THR A   9      37.585 -81.615  -9.239  1.00 19.24           C  
ATOM     31  C   THR A   9      36.857 -82.048  -7.970  1.00 19.48           C  
ATOM     32  O   THR A   9      35.842 -82.742  -8.035  1.00 23.14           O  
ATOM     33  N   GLY A  10      37.352 -81.601  -6.817  1.00 19.43           N  
ATOM     34  CA  GLY A  10      36.705 -81.916  -5.545  1.00 18.74           C  
ATOM     35  C   GLY A  10      37.155 -83.247  -4.956  1.00 17.62           C  
ATOM     36  O   GLY A  10      36.516 -83.791  -4.055  1.00 19.74           O  
ATOM     37  N   LYS A  11      38.266 -83.760  -5.475  1.00 13.56           N  
ATOM     38  CA  LYS A  11      38.795 -85.033  -4.986  1.00 11.91           C  
ATOM     39  C   LYS A  11      39.770 -84.789  -3.838  1.00 10.18           C  
ATOM     40  O   LYS A  11      40.569 -83.861  -3.905  1.00  9.10           O  
ATOM     41  N   THR A  12      39.738 -85.639  -2.804  1.00  9.63           N  
ATOM     42  CA  THR A  12      40.680 -85.488  -1.680  1.00  9.85           C  
ATOM     43  C   THR A  12      41.596 -86.708  -1.646  1.00 11.66           C  
ATOM     44  O   THR A  12      41.118 -87.841  -1.594  1.00 12.33           O  
ATOM     45  N   ILE A  13      42.912 -86.480  -1.652  1.00 10.42           N  
ATOM     46  CA  ILE A  13      43.878 -87.584  -1.596  1.00 11.84           C  
ATOM     47  C   ILE A  13      44.598 -87.576  -0.251  1.00 10.55           C  
ATOM     48  O   ILE A  13      44.989 -86.521   0.244  1.00 11.92           O  
ATOM     49  N   THR A  14      44.795 -88.766   0.321  1.00  9.39           N  
ATOM     50  CA  THR A  14      45.501 -88.889   1.596  1.00  9.63           C  
ATOM     51  C   THR A  14      46.916 -89.372   1.318  1.00 11.20           C  
ATOM     52  O   THR A  14      47.110 -90.331   0.571  1.00 11.63           O  
ATOM     53  N   LEU A  15      47.907 -88.700   1.903  1.00  8.29           N  
ATOM     54  CA  LEU A  15      49.310 -89.070   1.686  1.00  9.03           C  
ATOM     55  C   LEU A  15      50.020 -89.278   3.016  1.00  8.59           C  
ATOM     56  O   LEU A  15      49.738 -88.586   3.993  1.00  7.79           O  
ATOM     57  N   GLU A  16      50.996 -90.184   3.029  1.00 11.04           N  
ATOM     58  CA  GLU A  16      51.806 -90.415   4.224  1.00 11.50           C  
ATOM     59  C   GLU A  16      53.137 -89.722   3.968  1.00 10.13           C  
ATOM     60  O   GLU A  16      53.809 -90.006   2.977  1.00  9.83           O  
ATOM     61  N   VAL A  17      53.506 -88.793   4.843  1.00  8.99           N  
ATOM     62  CA  VAL A  17      54.750 -88.042   4.675  1.00  8.85           C  
ATOM     63  C   VAL A  17      55.456 -87.839   6.009  1.00  8.04           C  
ATOM     64  O   VAL A  17      54.881 -88.046   7.077  1.00  8.99           O  
ATOM     65  N   GLU A  18      56.699 -87.371   5.921  1.00  7.29           N  
ATOM     66  CA  GLU A  18      57.499 -87.060   7.109  1.00  7.08           C  
ATOM     67  C   GLU A  18      57.792 -85.556   7.082  1.00  6.45           C  
ATOM     68  O   GLU A  18      57.878 -84.985   5.995  1.00  5.28           O  
ATOM     69  N   PRO A  19      57.935 -84.873   8.202  1.00  7.24           N  
ATOM     70  CA  PRO A  19      58.198 -83.415   8.159  1.00  7.07           C  
ATOM     71  C   PRO A  19      59.452 -83.062   7.361  1.00  6.65           C  
ATOM     72  O   PRO A  19      59.580 -81.946   6.856  1.00  6.37           O  
ATOM     73  N   SER A  20      60.382 -84.012   7.269  1.00  6.80           N  
ATOM     74  CA  SER A  20      61.632 -83.785   6.550  1.00  6.28           C  
ATOM     75  C   SER A  20      61.485 -84.069   5.060  1.00  8.45           C  
ATOM     76  O   SER A  20      62.432 -83.875   4.298  1.00  7.26           O  
ATOM     77  N   ASP A  21      60.302 -84.502   4.629  1.00  7.50           N  
ATOM     78  CA  ASP A  21      60.090 -84.762   3.213  1.00  7.70           C  
ATOM     79  C   ASP A  21      60.083 -83.429   2.496  1.00  7.08           C  
ATOM     80  O   ASP A  21      59.569 -82.419   2.998  1.00  8.11           O  
ATOM     81  N   THR A  22      60.637 -83.460   1.287  1.00  5.37           N  
ATOM     82  CA  THR A  22      60.685 -82.286   0.443  1.00  6.01           C  
ATOM     83  C   THR A  22      59.400 -82.174  -0.361  1.00  8.01           C  
ATOM     84  O   THR A  22      58.719 -83.165  -0.606  1.00  8.11           O  
ATOM     85  N   ILE A  23      59.097 -80.963  -0.789  1.00  8.32           N  
ATOM     86  CA  ILE A  23      57.914 -80.710  -1.600  1.00  9.92           C  
ATOM     87  C   ILE A  23      58.020 -81.499  -2.906  1.00 10.01           C  
ATOM     88  O   ILE A  23      57.037 -82.069  -3.372  1.00  8.71           O  
ATOM     89  N   GLU A  24      59.224 -81.554  -3.476  1.00  9.54           N  
ATOM     90  CA  GLU A  24      59.442 -82.318  -4.706  1.00 11.81           C  
ATOM     91  C   GLU A  24      59.100 -83.780  -4.446  1.00 11.14           C  
ATOM     92  O   GLU A  24      58.538 -84.457  -5.303  1.00 10.62           O  
ATOM     93  N   ASN A  25      59.444 -84.259  -3.256  1.00  9.43           N  
ATOM     94  CA  ASN A  25      59.156 -85.646  -2.908  1.00 10.96           C  
ATOM     95  C   ASN A  25      57.645 -85.840  -2.820  1.00  9.68           C  
ATOM     96  O   ASN A  25      57.113 -86.838  -3.301  1.00  9.33           O  
ATOM     97  N   VAL A  26      56.957 -84.873  -2.217  1.00  6.52           N  
ATOM     98  CA  VAL A  26      55.506 -84.952  -2.099  1.00  5.53           C  
ATOM     99  C   VAL A  26      54.883 -84.984  -3.492  1.00  4.42           C  
ATOM    100  O   VAL A  26      53.962 -85.764  -3.743  1.00  3.40           O  
ATOM    101  N   LYS A  27      55.392 -84.152  -4.414  1.00  2.64           N  
ATOM    102  CA  LYS A  27      54.873 -84.131  -5.775  1.00  4.14           C  
ATOM    103  C   LYS A  27      55.051 -85.510  -6.397  1.00  5.58           C  
ATOM    104  O   LYS A  27      54.187 -85.991  -7.125  1.00  4.11           O  
ATOM    105  N   ALA A  28      56.197 -86.127  -6.118  1.00  6.61           N  
ATOM    106  CA  ALA A  28      56.499 -87.438  -6.672  1.00  7.74           C  
ATOM    107  C   ALA A  28      55.490 -88.472  -6.186  1.00  9.17           C  
ATOM    108  O   ALA A  28      55.060 -89.334  -6.952  1.00 11.45           O  
ATOM    109  N   LYS A  29      55.089 -88.368  -4.926  1.00  8.96           N  
ATOM    110  CA  LYS A  29      54.100 -89.292  -4.388  1.00  7.90           C  
ATOM    111  C   LYS A  29      52.763 -89.097  -5.102  1.00  6.92           C  
ATOM    112  O   LYS A  29      52.079 -90.064  -5.424  1.00  6.87           O  
ATOM    113  N   ILE A  30      52.420 -87.833  -5.391  1.00  4.57           N  
ATOM    114  CA  ILE A  30      51.184 -87.516  -6.111  1.00  5.58           C  
ATOM    115  C   ILE A  30      51.255 -88.087  -7.533  1.00  7.26           C  
ATOM    116  O   ILE A  30      50.268 -88.612  -8.038  1.00  9.46           O  
ATOM    117  N   GLN A  31      52.417 -87.987  -8.176  1.00  7.06           N  
ATOM    118  CA  GLN A  31      52.585 -88.507  -9.537  1.00  8.67           C  
ATOM    119  C   GLN A  31      52.309 -90.005  -9.549  1.00 10.90           C  
ATOM    120  O   GLN A  31      51.639 -90.526 -10.440  1.00  9.63           O  
ATOM    121  N   ASP A  32      52.860 -90.677  -8.566  1.00 10.93           N  
ATOM    122  CA  ASP A  32      52.699 -92.119  -8.477  1.00 14.01           C  
ATOM    123  C   ASP A  32      51.225 -92.496  -8.347  1.00 14.04           C  
ATOM    124  O   ASP A  32      50.777 -93.493  -8.915  1.00 13.39           O  
ATOM    125  N   LYS A  33      50.486 -91.718  -7.560  1.00 14.22           N  
ATOM    126  CA  LYS A  33      49.073 -92.002  -7.314  1.00 14.00           C  
ATOM    127  C   LYS A  33      48.126 -91.503  -8.419  1.00 12.37           C  
ATOM    128  O   LYS A  33      47.121 -92.157  -8.699  1.00 12.17           O  
ATOM    129  N   GLU A  34      48.378 -90.311  -8.976  1.00 10.11           N  
ATOM    130  CA  GLU A  34      47.449 -89.716  -9.962  1.00 10.07           C  
ATOM    131  C   GLU A  34      47.961 -89.624 -11.407  1.00  9.32           C  
ATOM    132  O   GLU A  34      47.173 -89.445 -12.335  1.00 11.61           O  
ATOM    133  N   GLY A  35      49.266 -89.779 -11.601  1.00  7.22           N  
ATOM    134  CA  GLY A  35      49.837 -89.743 -12.953  1.00  6.29           C  
ATOM    135  C   GLY A  35      50.076 -88.318 -13.468  1.00  6.93           C  
ATOM    136  O   GLY A  35      50.358 -88.112 -14.649  1.00  7.41           O  
ATOM    137  N   ILE A  36      49.959 -87.348 -12.574  1.00  5.86           N  
ATOM    138  CA  ILE A  36      50.160 -85.943 -12.942  1.00  6.07           C  
ATOM    139  C   ILE A  36      51.658 -85.592 -12.866  1.00  6.36           C  
ATOM    140  O   ILE A  36      52.235 -85.658 -11.781  1.00  6.18           O  
ATOM    141  N   PRO A  37      52.319 -85.222 -13.954  1.00  8.65           N  
ATOM    142  CA  PRO A  37      53.775 -84.877 -13.892  1.00  9.18           C  
ATOM    143  C   PRO A  37      54.060 -83.696 -12.927  1.00  9.85           C  
ATOM    144  O   PRO A  37      53.366 -82.681 -12.976  1.00  8.51           O  
ATOM    145  N   PRO A  38      55.059 -83.808 -12.052  1.00  8.71           N  
ATOM    146  CA  PRO A  38      55.412 -82.721 -11.072  1.00  9.08           C  
ATOM    147  C   PRO A  38      55.530 -81.318 -11.690  1.00  9.28           C  
ATOM    148  O   PRO A  38      55.283 -80.327 -11.003  1.00  6.50           O  
ATOM    149  N   ASP A  39      55.932 -81.214 -12.945  1.00 11.20           N  
ATOM    150  CA  ASP A  39      56.098 -79.896 -13.558  1.00 14.96           C  
ATOM    151  C   ASP A  39      54.752 -79.229 -13.830  1.00 13.99           C  
ATOM    152  O   ASP A  39      54.688 -78.022 -14.065  1.00 13.75           O  
ATOM    153  N   GLN A  40      53.673 -80.015 -13.801  1.00 11.60           N  
ATOM    154  CA  GLN A  40      52.331 -79.477 -14.052  1.00 10.76           C  
ATOM    155  C   GLN A  40      51.564 -79.236 -12.754  1.00  8.01           C  
ATOM    156  O   GLN A  40      50.398 -78.845 -12.780  1.00  8.96           O  
ATOM    157  N   GLN A  41      52.204 -79.511 -11.623  1.00  6.52           N  
ATOM    158  CA  GLN A  41      51.543 -79.361 -10.322  1.00  3.87           C  
ATOM    159  C   GLN A  41      52.014 -78.139  -9.534  1.00  4.79           C  
ATOM    160  O   GLN A  41      53.210 -77.862  -9.439  1.00  6.34           O  
ATOM    161  N   ARG A  42      51.047 -77.459  -8.910  1.00  5.73           N  
ATOM    162  CA  ARG A  42      51.323 -76.308  -8.046  1.00  6.97           C  
ATOM    163  C   ARG A  42      50.674 -76.577  -6.693  1.00  7.15           C  
ATOM    164  O   ARG A  42      49.467 -76.794  -6.617  1.00  7.33           O  
ATOM    165  N   LEU A  43      51.465 -76.580  -5.626  1.00  4.65           N  
ATOM    166  CA  LEU A  43      50.946 -76.846  -4.280  1.00  3.51           C  
ATOM    167  C   LEU A  43      50.850 -75.560  -3.473  1.00  5.56           C  
ATOM    168  O   LEU A  43      51.801 -74.783  -3.395  1.00  4.19           O  
ATOM    169  N   ILE A  44      49.679 -75.349  -2.874  1.00  4.58           N  
ATOM    170  CA  ILE A  44      49.428 -74.159  -2.060  1.00  5.55           C  
ATOM    171  C   ILE A  44      48.988 -74.558  -0.653  1.00  5.46           C  
ATOM    172  O   ILE A  44      48.169 -75.464  -0.471  1.00  6.04           O  
ATOM    173  N   PHE A  45      49.519 -73.833   0.332  1.00  6.75           N  
ATOM    174  CA  PHE A  45      49.169 -74.052   1.732  1.00  4.70           C  
ATOM    175  C   PHE A  45      48.959 -72.705   2.408  1.00  6.34           C  
ATOM    176  O   PHE A  45      49.826 -71.832   2.361  1.00  5.45           O  
ATOM    177  N   ALA A  46      47.805 -72.545   3.035  1.00  6.53           N  
ATOM    178  CA  ALA A  46      47.476 -71.308   3.723  1.00  7.15           C  
ATOM    179  C   ALA A  46      47.742 -70.090   2.841  1.00  9.00           C  
ATOM    180  O   ALA A  46      48.172 -69.043   3.324  1.00 11.15           O  
ATOM    181  N   GLY A  47      47.421 -70.219   1.550  1.00  9.35           N  
ATOM    182  CA  GLY A  47      47.565 -69.101   0.618  1.00 11.68           C  
ATOM    183  C   GLY A  47      48.972 -68.924   0.041  1.00 11.14           C  
ATOM    184  O   GLY A  47      49.192 -67.995  -0.736  1.00 13.93           O  
ATOM    185  N   LYS A  48      49.938 -69.776   0.417  1.00 10.47           N  
ATOM    186  CA  LYS A  48      51.315 -69.631  -0.091  1.00  8.82           C  
ATOM    187  C   LYS A  48      51.711 -70.793  -1.004  1.00  7.68           C  
ATOM    188  O   LYS A  48      51.431 -71.951  -0.701  1.00  6.47           O  
ATOM    189  N   GLN A  49      52.405 -70.477  -2.100  1.00  8.89           N  
ATOM    190  CA  GLN A  49      52.874 -71.518  -3.014  1.00  7.18           C  
ATOM    191  C   GLN A  49      54.120 -72.163  -2.412  1.00  8.23           C  
ATOM    192  O   GLN A  49      55.053 -71.467  -2.010  1.00  9.70           O  
ATOM    193  N   LEU A  50      54.132 -73.491  -2.344  1.00  6.51           N  
ATOM    194  CA  LEU A  50      55.274 -74.209  -1.779  1.00  7.41           C  
ATOM    195  C   LEU A  50      56.340 -74.479  -2.844  1.00  8.27           C  
ATOM    196  O   LEU A  50      56.021 -74.856  -3.972  1.00  8.34           O  
ATOM    197  N   GLU A  51      57.612 -74.271  -2.479  1.00  9.43           N  
ATOM    198  CA  GLU A  51      58.713 -74.488  -3.432  1.00 11.90           C  
ATOM    199  C   GLU A  51      59.248 -75.918  -3.358  1.00 11.49           C  
ATOM    200  O   GLU A  51      59.169 -76.574  -2.321  1.00  9.88           O  
ATOM    201  N   ASP A  52      59.748 -76.397  -4.503  1.00 12.71           N  
ATOM    202  CA  ASP A  52      60.247 -77.768  -4.615  1.00 16.56           C  
ATOM    203  C   ASP A  52      61.546 -78.019  -3.825  1.00 15.83           C  
ATOM    204  O   ASP A  52      61.874 -79.170  -3.537  1.00 17.21           O  
ATOM    205  N   GLY A  53      62.289 -76.968  -3.484  1.00 15.00           N  
ATOM    206  CA  GLY A  53      63.553 -77.138  -2.739  1.00 11.77           C  
ATOM    207  C   GLY A  53      63.373 -76.996  -1.219  1.00 11.10           C  
ATOM    208  O   GLY A  53      64.353 -77.042  -0.475  1.00 11.25           O  
ATOM    209  N   ARG A  54      62.140 -76.835  -0.761  1.00  8.53           N  
ATOM    210  CA  ARG A  54      61.874 -76.701   0.688  1.00  9.05           C  
ATOM    211  C   ARG A  54      61.138 -77.937   1.237  1.00  8.96           C  
ATOM    212  O   ARG A  54      60.630 -78.754   0.469  1.00 11.60           O  
ATOM    213  N   THR A  55      61.089 -78.070   2.582  1.00  9.05           N  
ATOM    214  CA  THR A  55      60.407 -79.210   3.232  1.00  9.03           C  
ATOM    215  C   THR A  55      59.094 -78.795   3.898  1.00  8.15           C  
ATOM    216  O   THR A  55      58.815 -77.612   4.091  1.00  5.91           O  
ATOM    217  N   LEU A  56      58.308 -79.813   4.267  1.00  6.91           N  
ATOM    218  CA  LEU A  56      57.023 -79.589   4.945  1.00  8.29           C  
ATOM    219  C   LEU A  56      57.219 -78.844   6.266  1.00  8.05           C  
ATOM    220  O   LEU A  56      56.432 -77.957   6.595  1.00 10.17           O  
ATOM    221  N   SER A  57      58.244 -79.213   7.045  1.00  8.92           N  
ATOM    222  CA  SER A  57      58.451 -78.551   8.334  1.00  9.00           C  
ATOM    223  C   SER A  57      58.727 -77.057   8.173  1.00  9.44           C  
ATOM    224  O   SER A  57      58.399 -76.263   9.054  1.00 10.91           O  
ATOM    225  N   ASP A  58      59.331 -76.680   7.061  1.00  9.11           N  
ATOM    226  CA  ASP A  58      59.644 -75.273   6.825  1.00  7.91           C  
ATOM    227  C   ASP A  58      58.368 -74.435   6.768  1.00  9.12           C  
ATOM    228  O   ASP A  58      58.387 -73.246   7.084  1.00  8.61           O  
ATOM    229  N   TYR A  59      57.256 -75.057   6.360  1.00  7.97           N  
ATOM    230  CA  TYR A  59      55.974 -74.345   6.264  1.00  8.45           C  
ATOM    231  C   TYR A  59      55.085 -74.620   7.476  1.00 10.98           C  
ATOM    232  O   TYR A  59      53.887 -74.343   7.444  1.00 12.95           O  
ATOM    233  N   ASN A  60      55.676 -75.162   8.544  1.00 12.38           N  
ATOM    234  CA  ASN A  60      54.954 -75.471   9.775  1.00 13.94           C  
ATOM    235  C   ASN A  60      53.678 -76.263   9.502  1.00 14.16           C  
ATOM    236  O   ASN A  60      52.658 -76.060  10.160  1.00 14.26           O  
ATOM    237  N   ILE A  61      53.750 -77.190   8.551  1.00 11.08           N  
ATOM    238  CA  ILE A  61      52.597 -78.028   8.230  1.00 11.78           C  
ATOM    239  C   ILE A  61      52.538 -79.163   9.252  1.00 13.74           C  
ATOM    240  O   ILE A  61      53.523 -79.872   9.456  1.00 14.60           O  
ATOM    241  N   GLN A  62      51.392 -79.298   9.938  1.00 13.97           N  
ATOM    242  CA  GLN A  62      51.221 -80.308  10.992  1.00 15.52           C  
ATOM    243  C   GLN A  62      50.316 -81.460  10.546  1.00 13.94           C  
ATOM    244  O   GLN A  62      49.679 -81.404   9.494  1.00 12.15           O  
ATOM    245  N   LYS A  63      50.303 -82.518  11.359  1.00 11.73           N  
ATOM    246  CA  LYS A  63      49.501 -83.692  11.016  1.00 11.97           C  
ATOM    247  C   LYS A  63      48.054 -83.318  10.697  1.00 10.41           C  
ATOM    248  O   LYS A  63      47.467 -82.433  11.320  1.00  9.59           O  
ATOM    249  N   GLU A  64      47.505 -84.002   9.696  1.00 10.04           N  
ATOM    250  CA  GLU A  64      46.137 -83.774   9.226  1.00 10.94           C  
ATOM    251  C   GLU A  64      45.961 -82.409   8.575  1.00  9.74           C  
ATOM    252  O   GLU A  64      44.840 -81.915   8.460  1.00  9.42           O  
ATOM    253  N   SER A  65      47.044 -81.835   8.083  1.00  6.85           N  
ATOM    254  CA  SER A  65      46.970 -80.572   7.366  1.00  6.90           C  
ATOM    255  C   SER A  65      46.444 -80.854   5.967  1.00  4.72           C  
ATOM    256  O   SER A  65      46.676 -81.930   5.416  1.00  3.91           O  
ATOM    257  N   THR A  66      45.738 -79.880   5.386  1.00  4.48           N  
ATOM    258  CA  THR A  66      45.186 -80.026   4.040  1.00  3.80           C  
ATOM    259  C   THR A  66      45.929 -79.104   3.073  1.00  4.60           C  
ATOM    260  O   THR A  66      46.009 -77.893   3.280  1.00  5.33           O  
ATOM    261  N   LEU A  67      46.433 -79.699   1.997  1.00  4.17           N  
ATOM    262  CA  LEU A  67      47.138 -78.970   0.946  1.00  3.85           C  
ATOM    263  C   LEU A  67      46.194 -78.851  -0.245  1.00  3.80           C  
ATOM    264  O   LEU A  67      45.272 -79.648  -0.406  1.00  5.54           O  
ATOM    265  N   HIS A  68      46.439 -77.845  -1.087  1.00  2.94           N  
ATOM    266  CA  HIS A  68      45.626 -77.622  -2.280  1.00  4.17           C  
ATOM    267  C   HIS A  68      46.498 -77.825  -3.512  1.00  5.32           C  
ATOM    268  O   HIS A  68      47.604 -77.288  -3.596  1.00  7.70           O  
ATOM    269  N   LEU A  69      45.996 -78.602  -4.471  1.00  5.29           N  
ATOM    270  CA  LEU A  69      46.731 -78.877  -5.706  1.00  3.97           C  
ATOM    271  C   LEU A  69      46.100 -78.098  -6.853  1.00  5.07           C  
ATOM    272  O   LEU A  69      44.884 -78.135  -7.044  1.00  4.34           O  
ATOM    273  N   VAL A  70      46.940 -77.402  -7.633  1.00  4.29           N  
ATOM    274  CA  VAL A  70      46.511 -76.617  -8.786  1.00  6.26           C  
ATOM    275  C   VAL A  70      47.225 -77.171 -10.014  1.00  9.22           C  
ATOM    276  O   VAL A  70      48.388 -77.564  -9.955  1.00  9.36           O  
TER
ENDMDL
MODEL      6
ATOM      1  N   GLN A   2      50.553 -88.637   7.992  1.00  9.27           N  
ATOM      2  CA  GLN A   2      49.678 -88.658   6.819  1.00  9.07           C  
ATOM      3  C   GLN A   2      49.126 -87.265   6.549  1.00  8.72           C  
ATOM      4  O   GLN A   2      48.753 -86.533   7.469  1.00  8.22           O  
ATOM      5  N   ILE A   3      49.049 -86.925   5.258  1.00  5.87           N  
ATOM      6  CA  ILE A   3      48.511 -85.640   4.820  1.00  5.07           C  
ATOM      7  C   ILE A   3      47.469 -85.880   3.729  1.00  4.01           C  
ATOM      8  O   ILE A   3      47.370 -86.983   3.184  1.00  4.61           O  
ATOM      9  N   PHE A   4      46.697 -84.837   3.410  1.00  4.55           N  
ATOM     10  CA  PHE A   4      45.661 -84.942   2.375  1.00  4.68           C  
ATOM     11  C   PHE A   4      45.838 -83.873   1.303  1.00  5.30           C  
ATOM     12  O   PHE A   4      46.093 -82.720   1.611  1.00  5.58           O  
ATOM     13  N   VAL A   5      45.655 -84.261   0.037  1.00  4.44           N  
ATOM     14  CA  VAL A   5      45.745 -83.308  -1.078  1.00  3.87           C  
ATOM     15  C   VAL A   5      44.410 -83.296  -1.815  1.00  4.93           C  
ATOM     16  O   VAL A   5      43.936 -84.337  -2.265  1.00  6.84           O  
ATOM     17  N   LYS A   6      43.810 -82.113  -1.954  1.00  6.04           N  
ATOM     18  CA  LYS A   6      42.530 -81.986  -2.660  1.00  6.12           C  
ATOM     19  C   LYS A   6      42.774 -81.479  -4.080  1.00  6.57           C  
ATOM     20  O   LYS A   6      43.609 -80.599  -4.301  1.00  5.76           O  
ATOM     21  N   THR A   7      42.028 -82.035  -5.043  1.00  7.41           N  
ATOM     22  CA  THR A   7      42.159 -81.626  -6.441  1.00  7.48           C  
ATOM     23  C   THR A   7      41.001 -80.719  -6.848  1.00  8.75           C  
ATOM     24  O   THR A   7      39.967 -80.648  -6.184  1.00  8.58           O  
ATOM     25  N   LEU A   8      41.211 -80.048  -7.951  1.00  9.84           N  
ATOM     26  CA  LEU A   8      40.199 -79.140  -8.486  1.00 14.15           C  
ATOM     27  C   LEU A   8      38.930 -79.895  -8.864  1.00 17.37           C  
ATOM     28  O   LEU A   8      37.881 -79.282  -9.060  1.00 17.01           O  
ATOM     29  N   THR A   9      39.020 -81.224  -8.980  1.00 18.33           N  
ATOM     30  CA  THR A   9      37.850 -82.025  -9.355  1.00 19.24           C  
ATOM     31  C   THR A   9      37.130 -82.583  -8.130  1.00 19.48           C  
ATOM     32  O   THR A   9      36.143 -83.307  -8.254  1.00 23.14           O  
ATOM     33  N   GLY A  10      37.601 -82.196  -6.944  1.00 19.43           N  
ATOM     34  CA  GLY A  10      36.963 -82.614  -5.698  1.00 18.74           C  
ATOM     35  C   GLY A  10      37.473 -83.946  -5.159  1.00 17.62           C  
ATOM     36  O   GLY A  10      36.862 -84.544  -4.273  1.00 19.74           O  
ATOM     37  N   LYS A  11      38.601 -84.405  -5.700  1.00 13.56           N  
ATOM     38  CA  LYS A  11      39.169 -85.677  -5.246  1.00 11.91           C  
ATOM     39  C   LYS A  11      40.154 -85.434  -4.105  1.00 10.18           C  
ATOM     40  O   LYS A  11      40.885 -84.446  -4.128  1.00  9.10           O  
ATOM     41  N   THR A  12      40.201 -86.342  -3.124  1.00  9.63           N  
ATOM     42  CA  THR A  12      41.150 -86.195  -2.008  1.00  9.85           C  
ATOM     43  C   THR A  12      42.120 -87.371  -2.020  1.00 11.66           C  
ATOM     44  O   THR A  12      41.699 -88.528  -2.019  1.00 12.33           O  
ATOM     45  N   ILE A  13      43.422 -87.075  -2.011  1.00 10.42           N  
ATOM     46  CA  ILE A  13      44.443 -88.128  -1.998  1.00 11.84           C  
ATOM     47  C   ILE A  13      45.158 -88.138  -0.651  1.00 10.55           C  
ATOM     48  O   ILE A  13      45.503 -87.086  -0.113  1.00 11.92           O  
ATOM     49  N   THR A  14      45.399 -89.338  -0.121  1.00  9.39           N  
ATOM     50  CA  THR A  14      46.100 -89.477   1.155  1.00  9.63           C  
ATOM     51  C   THR A  14      47.536 -89.894   0.882  1.00 11.20           C  
ATOM     52  O   THR A  14      47.779 -90.821   0.109  1.00 11.63           O  
ATOM     53  N   LEU A  15      48.491 -89.202   1.504  1.00  8.29           N  
ATOM     54  CA  LEU A  15      49.911 -89.513   1.301  1.00  9.03           C  
ATOM     55  C   LEU A  15      50.611 -89.738   2.631  1.00  8.59           C  
ATOM     56  O   LEU A  15      50.291 -89.090   3.626  1.00  7.79           O  
ATOM     57  N   GLU A  16      51.622 -90.607   2.624  1.00 11.04           N  
ATOM     58  CA  GLU A  16      52.426 -90.852   3.821  1.00 11.50           C  
ATOM     59  C   GLU A  16      53.720 -90.075   3.622  1.00 10.13           C  
ATOM     60  O   GLU A  16      54.426 -90.276   2.633  1.00  9.83           O  
ATOM     61  N   VAL A  17      54.016 -89.163   4.544  1.00  8.99           N  
ATOM     62  CA  VAL A  17      55.214 -88.332   4.435  1.00  8.85           C  
ATOM     63  C   VAL A  17      55.876 -88.128   5.790  1.00  8.04           C  
ATOM     64  O   VAL A  17      55.293 -88.405   6.838  1.00  8.99           O  
ATOM     65  N   GLU A  18      57.081 -87.568   5.741  1.00  7.29           N  
ATOM     66  CA  GLU A  18      57.832 -87.227   6.948  1.00  7.08           C  
ATOM     67  C   GLU A  18      58.008 -85.705   6.944  1.00  6.45           C  
ATOM     68  O   GLU A  18      58.091 -85.116   5.865  1.00  5.28           O  
ATOM     69  N   PRO A  19      58.046 -85.029   8.071  1.00  7.24           N  
ATOM     70  CA  PRO A  19      58.188 -83.550   8.058  1.00  7.07           C  
ATOM     71  C   PRO A  19      59.419 -83.087   7.279  1.00  6.65           C  
ATOM     72  O   PRO A  19      59.478 -81.945   6.821  1.00  6.37           O  
ATOM     73  N   SER A  20      60.409 -83.969   7.150  1.00  6.80           N  
ATOM     74  CA  SER A  20      61.642 -83.625   6.445  1.00  6.28           C  
ATOM     75  C   SER A  20      61.529 -83.851   4.936  1.00  8.45           C  
ATOM     76  O   SER A  20      62.479 -83.578   4.203  1.00  7.26           O  
ATOM     77  N   ASP A  21      60.374 -84.321   4.457  1.00  7.50           N  
ATOM     78  CA  ASP A  21      60.214 -84.522   3.020  1.00  7.70           C  
ATOM     79  C   ASP A  21      60.171 -83.158   2.357  1.00  7.08           C  
ATOM     80  O   ASP A  21      59.597 -82.197   2.887  1.00  8.11           O  
ATOM     81  N   THR A  22      60.753 -83.105   1.158  1.00  5.37           N  
ATOM     82  CA  THR A  22      60.755 -81.888   0.372  1.00  6.01           C  
ATOM     83  C   THR A  22      59.479 -81.809  -0.450  1.00  8.01           C  
ATOM     84  O   THR A  22      58.855 -82.824  -0.746  1.00  8.11           O  
ATOM     85  N   ILE A  23      59.124 -80.598  -0.837  1.00  8.32           N  
ATOM     86  CA  ILE A  23      57.943 -80.371  -1.659  1.00  9.92           C  
ATOM     87  C   ILE A  23      58.102 -81.113  -2.988  1.00 10.01           C  
ATOM     88  O   ILE A  23      57.152 -81.715  -3.485  1.00  8.71           O  
ATOM     89  N   GLU A  24      59.315 -81.090  -3.546  1.00  9.54           N  
ATOM     90  CA  GLU A  24      59.582 -81.801  -4.799  1.00 11.81           C  
ATOM     91  C   GLU A  24      59.303 -83.288  -4.594  1.00 11.14           C  
ATOM     92  O   GLU A  24      58.783 -83.958  -5.482  1.00 10.62           O  
ATOM     93  N   ASN A  25      59.656 -83.793  -3.418  1.00  9.43           N  
ATOM     94  CA  ASN A  25      59.430 -85.205  -3.122  1.00 10.96           C  
ATOM     95  C   ASN A  25      57.931 -85.484  -3.057  1.00  9.68           C  
ATOM     96  O   ASN A  25      57.459 -86.482  -3.597  1.00  9.33           O  
ATOM     97  N   VAL A  26      57.185 -84.592  -2.409  1.00  6.52           N  
ATOM     98  CA  VAL A  26      55.738 -84.761  -2.309  1.00  5.53           C  
ATOM     99  C   VAL A  26      55.128 -84.776  -3.710  1.00  4.42           C  
ATOM    100  O   VAL A  26      54.267 -85.608  -4.006  1.00  3.40           O  
ATOM    101  N   LYS A  27      55.582 -83.870  -4.588  1.00  2.64           N  
ATOM    102  CA  LYS A  27      55.075 -83.825  -5.954  1.00  4.14           C  
ATOM    103  C   LYS A  27      55.356 -85.159  -6.644  1.00  5.58           C  
ATOM    104  O   LYS A  27      54.533 -85.663  -7.404  1.00  4.11           O  
ATOM    105  N   ALA A  28      56.542 -85.708  -6.382  1.00  6.61           N  
ATOM    106  CA  ALA A  28      56.943 -86.969  -6.996  1.00  7.74           C  
ATOM    107  C   ALA A  28      56.009 -88.093  -6.564  1.00  9.17           C  
ATOM    108  O   ALA A  28      55.652 -88.955  -7.366  1.00 11.45           O  
ATOM    109  N   LYS A  29      55.595 -88.064  -5.306  1.00  8.96           N  
ATOM    110  CA  LYS A  29      54.676 -89.075  -4.800  1.00  7.90           C  
ATOM    111  C   LYS A  29      53.330 -88.960  -5.516  1.00  6.92           C  
ATOM    112  O   LYS A  29      52.732 -89.965  -5.889  1.00  6.87           O  
ATOM    113  N   ILE A  30      52.890 -87.720  -5.760  1.00  4.57           N  
ATOM    114  CA  ILE A  30      51.644 -87.472  -6.487  1.00  5.58           C  
ATOM    115  C   ILE A  30      51.774 -87.986  -7.924  1.00  7.26           C  
ATOM    116  O   ILE A  30      50.831 -88.556  -8.464  1.00  9.46           O  
ATOM    117  N   GLN A  31      52.938 -87.785  -8.543  1.00  7.06           N  
ATOM    118  CA  GLN A  31      53.153 -88.243  -9.918  1.00  8.67           C  
ATOM    119  C   GLN A  31      52.975 -89.757  -9.979  1.00 10.90           C  
ATOM    120  O   GLN A  31      52.358 -90.293 -10.900  1.00  9.63           O  
ATOM    121  N   ASP A  32      53.554 -90.427  -9.007  1.00 10.93           N  
ATOM    122  CA  ASP A  32      53.490 -91.880  -8.969  1.00 14.01           C  
ATOM    123  C   ASP A  32      52.039 -92.356  -8.892  1.00 14.04           C  
ATOM    124  O   ASP A  32      51.669 -93.359  -9.502  1.00 13.39           O  
ATOM    125  N   LYS A  33      51.238 -91.657  -8.092  1.00 14.22           N  
ATOM    126  CA  LYS A  33      49.841 -92.040  -7.879  1.00 14.00           C  
ATOM    127  C   LYS A  33      48.875 -91.570  -8.981  1.00 12.37           C  
ATOM    128  O   LYS A  33      47.925 -92.286  -9.300  1.00 12.17           O  
ATOM    129  N   GLU A  34      49.043 -90.344  -9.489  1.00 10.11           N  
ATOM    130  CA  GLU A  34      48.083 -89.784 -10.466  1.00 10.07           C  
ATOM    131  C   GLU A  34      48.599 -89.615 -11.903  1.00  9.32           C  
ATOM    132  O   GLU A  34      47.809 -89.434 -12.829  1.00 11.61           O  
ATOM    133  N   GLY A  35      49.909 -89.706 -12.092  1.00  7.22           N  
ATOM    134  CA  GLY A  35      50.486 -89.594 -13.436  1.00  6.29           C  
ATOM    135  C   GLY A  35      50.651 -88.141 -13.900  1.00  6.93           C  
ATOM    136  O   GLY A  35      50.922 -87.879 -15.072  1.00  7.41           O  
ATOM    137  N   ILE A  36      50.478 -87.211 -12.974  1.00  5.86           N  
ATOM    138  CA  ILE A  36      50.603 -85.785 -13.293  1.00  6.07           C  
ATOM    139  C   ILE A  36      52.079 -85.358 -13.173  1.00  6.36           C  
ATOM    140  O   ILE A  36      52.636 -85.430 -12.077  1.00  6.18           O  
ATOM    141  N   PRO A  37      52.742 -84.921 -14.234  1.00  8.65           N  
ATOM    142  CA  PRO A  37      54.177 -84.507 -14.129  1.00  9.18           C  
ATOM    143  C   PRO A  37      54.387 -83.352 -13.113  1.00  9.85           C  
ATOM    144  O   PRO A  37      53.643 -82.372 -13.135  1.00  8.51           O  
ATOM    145  N   PRO A  38      55.378 -83.447 -12.228  1.00  8.71           N  
ATOM    146  CA  PRO A  38      55.661 -82.383 -11.203  1.00  9.08           C  
ATOM    147  C   PRO A  38      55.720 -80.957 -11.771  1.00  9.28           C  
ATOM    148  O   PRO A  38      55.426 -80.002 -11.052  1.00  6.50           O  
ATOM    149  N   ASP A  39      56.124 -80.793 -13.022  1.00 11.20           N  
ATOM    150  CA  ASP A  39      56.235 -79.448 -13.590  1.00 14.96           C  
ATOM    151  C   ASP A  39      54.860 -78.844 -13.854  1.00 13.99           C  
ATOM    152  O   ASP A  39      54.731 -77.633 -14.035  1.00 13.75           O  
ATOM    153  N   GLN A  40      53.831 -79.691 -13.878  1.00 11.60           N  
ATOM    154  CA  GLN A  40      52.465 -79.223 -14.127  1.00 10.76           C  
ATOM    155  C   GLN A  40      51.674 -79.090 -12.830  1.00  8.01           C  
ATOM    156  O   GLN A  40      50.492 -78.746 -12.846  1.00  8.96           O  
ATOM    157  N   GLN A  41      52.322 -79.408 -11.712  1.00  6.52           N  
ATOM    158  CA  GLN A  41      51.660 -79.370 -10.404  1.00  3.87           C  
ATOM    159  C   GLN A  41      52.085 -78.183  -9.539  1.00  4.79           C  
ATOM    160  O   GLN A  41      53.267 -77.853  -9.439  1.00  6.34           O  
ATOM    161  N   ARG A  42      51.094 -77.590  -8.869  1.00  5.73           N  
ATOM    162  CA  ARG A  42      51.319 -76.479  -7.943  1.00  6.97           C  
ATOM    163  C   ARG A  42      50.678 -76.827  -6.599  1.00  7.15           C  
ATOM    164  O   ARG A  42      49.482 -77.095  -6.531  1.00  7.33           O  
ATOM    165  N   LEU A  43      51.471 -76.828  -5.525  1.00  4.65           N  
ATOM    166  CA  LEU A  43      50.972 -77.150  -4.182  1.00  3.51           C  
ATOM    167  C   LEU A  43      50.832 -75.877  -3.353  1.00  5.56           C  
ATOM    168  O   LEU A  43      51.745 -75.052  -3.289  1.00  4.19           O  
ATOM    169  N   ILE A  44      49.658 -75.722  -2.743  1.00  4.58           N  
ATOM    170  CA  ILE A  44      49.354 -74.541  -1.935  1.00  5.55           C  
ATOM    171  C   ILE A  44      48.849 -74.933  -0.550  1.00  5.46           C  
ATOM    172  O   ILE A  44      48.038 -75.851  -0.407  1.00  6.04           O  
ATOM    173  N   PHE A  45      49.323 -74.208   0.465  1.00  6.75           N  
ATOM    174  CA  PHE A  45      48.910 -74.452   1.847  1.00  4.70           C  
ATOM    175  C   PHE A  45      48.643 -73.128   2.553  1.00  6.34           C  
ATOM    176  O   PHE A  45      49.475 -72.221   2.534  1.00  5.45           O  
ATOM    177  N   ALA A  46      47.481 -73.034   3.184  1.00  6.53           N  
ATOM    178  CA  ALA A  46      47.096 -71.835   3.913  1.00  7.15           C  
ATOM    179  C   ALA A  46      47.300 -70.572   3.080  1.00  9.00           C  
ATOM    180  O   ALA A  46      47.694 -69.529   3.600  1.00 11.15           O  
ATOM    181  N   GLY A  47      46.968 -70.662   1.791  1.00  9.35           N  
ATOM    182  CA  GLY A  47      47.053 -69.501   0.906  1.00 11.68           C  
ATOM    183  C   GLY A  47      48.453 -69.219   0.358  1.00 11.14           C  
ATOM    184  O   GLY A  47      48.626 -68.251  -0.382  1.00 13.93           O  
ATOM    185  N   LYS A  48      49.461 -70.027   0.713  1.00 10.47           N  
ATOM    186  CA  LYS A  48      50.830 -69.784   0.226  1.00  8.82           C  
ATOM    187  C   LYS A  48      51.285 -70.884  -0.733  1.00  7.68           C  
ATOM    188  O   LYS A  48      51.050 -72.068  -0.490  1.00  6.47           O  
ATOM    189  N   GLN A  49      51.969 -70.486  -1.807  1.00  8.89           N  
ATOM    190  CA  GLN A  49      52.485 -71.455  -2.772  1.00  7.18           C  
ATOM    191  C   GLN A  49      53.764 -72.058  -2.194  1.00  8.23           C  
ATOM    192  O   GLN A  49      54.657 -71.330  -1.760  1.00  9.70           O  
ATOM    193  N   LEU A  50      53.845 -73.387  -2.176  1.00  6.51           N  
ATOM    194  CA  LEU A  50      55.020 -74.068  -1.629  1.00  7.41           C  
ATOM    195  C   LEU A  50      56.112 -74.241  -2.690  1.00  8.27           C  
ATOM    196  O   LEU A  50      55.828 -74.586  -3.837  1.00  8.34           O  
ATOM    197  N   GLU A  51      57.367 -73.980  -2.296  1.00  9.43           N  
ATOM    198  CA  GLU A  51      58.498 -74.093  -3.231  1.00 11.90           C  
ATOM    199  C   GLU A  51      59.129 -75.487  -3.204  1.00 11.49           C  
ATOM    200  O   GLU A  51      59.082 -76.185  -2.193  1.00  9.88           O  
ATOM    201  N   ASP A  52      59.679 -75.887  -4.356  1.00 12.71           N  
ATOM    202  CA  ASP A  52      60.277 -77.217  -4.505  1.00 16.56           C  
ATOM    203  C   ASP A  52      61.560 -77.411  -3.680  1.00 15.83           C  
ATOM    204  O   ASP A  52      61.958 -78.548  -3.427  1.00 17.21           O  
ATOM    205  N   GLY A  53      62.216 -76.329  -3.272  1.00 15.00           N  
ATOM    206  CA  GLY A  53      63.461 -76.445  -2.489  1.00 11.77           C  
ATOM    207  C   GLY A  53      63.224 -76.377  -0.972  1.00 11.10           C  
ATOM    208  O   GLY A  53      64.182 -76.362  -0.198  1.00 11.25           O  
ATOM    209  N   ARG A  54      61.966 -76.337  -0.549  1.00  8.53           N  
ATOM    210  CA  ARG A  54      61.643 -76.270   0.893  1.00  9.05           C  
ATOM    211  C   ARG A  54      60.997 -77.578   1.387  1.00  8.96           C  
ATOM    212  O   ARG A  54      60.556 -78.397   0.581  1.00 11.60           O  
ATOM    213  N   THR A  55      60.940 -77.767   2.726  1.00  9.05           N  
ATOM    214  CA  THR A  55      60.329 -78.976   3.320  1.00  9.03           C  
ATOM    215  C   THR A  55      58.985 -78.668   3.984  1.00  8.15           C  
ATOM    216  O   THR A  55      58.636 -77.513   4.223  1.00  5.91           O  
ATOM    217  N   LEU A  56      58.256 -79.744   4.304  1.00  6.91           N  
ATOM    218  CA  LEU A  56      56.955 -79.620   4.975  1.00  8.29           C  
ATOM    219  C   LEU A  56      57.102 -78.915   6.324  1.00  8.05           C  
ATOM    220  O   LEU A  56      56.267 -78.082   6.678  1.00 10.17           O  
ATOM    221  N   SER A  57      58.143 -79.254   7.094  1.00  8.92           N  
ATOM    222  CA  SER A  57      58.315 -78.629   8.406  1.00  9.00           C  
ATOM    223  C   SER A  57      58.484 -77.115   8.300  1.00  9.44           C  
ATOM    224  O   SER A  57      58.080 -76.379   9.200  1.00 10.91           O  
ATOM    225  N   ASP A  58      59.081 -76.655   7.218  1.00  9.11           N  
ATOM    226  CA  ASP A  58      59.294 -75.222   7.038  1.00  7.91           C  
ATOM    227  C   ASP A  58      57.961 -74.474   7.002  1.00  9.12           C  
ATOM    228  O   ASP A  58      57.891 -73.303   7.375  1.00  8.61           O  
ATOM    229  N   TYR A  59      56.902 -75.154   6.551  1.00  7.97           N  
ATOM    230  CA  TYR A  59      55.571 -74.537   6.471  1.00  8.45           C  
ATOM    231  C   TYR A  59      54.684 -74.937   7.651  1.00 10.98           C  
ATOM    232  O   TYR A  59      53.468 -74.748   7.612  1.00 12.95           O  
ATOM    233  N   ASN A  60      55.297 -75.490   8.701  1.00 12.38           N  
ATOM    234  CA  ASN A  60      54.581 -75.922   9.898  1.00 13.94           C  
ATOM    235  C   ASN A  60      53.378 -76.798   9.558  1.00 14.16           C  
ATOM    236  O   ASN A  60      52.330 -76.698  10.196  1.00 14.26           O  
ATOM    237  N   ILE A  61      53.541 -77.677   8.574  1.00 11.08           N  
ATOM    238  CA  ILE A  61      52.461 -78.585   8.195  1.00 11.78           C  
ATOM    239  C   ILE A  61      52.468 -79.764   9.168  1.00 13.74           C  
ATOM    240  O   ILE A  61      53.490 -80.427   9.346  1.00 14.60           O  
ATOM    241  N   GLN A  62      51.328 -79.987   9.838  1.00 13.97           N  
ATOM    242  CA  GLN A  62      51.198 -81.046  10.848  1.00 15.52           C  
ATOM    243  C   GLN A  62      50.323 -82.205  10.363  1.00 13.94           C  
ATOM    244  O   GLN A  62      49.685 -82.128   9.313  1.00 12.15           O  
ATOM    245  N   LYS A  63      50.335 -83.289  11.142  1.00 11.73           N  
ATOM    246  CA  LYS A  63      49.561 -84.469  10.759  1.00 11.97           C  
ATOM    247  C   LYS A  63      48.110 -84.108  10.449  1.00 10.41           C  
ATOM    248  O   LYS A  63      47.512 -83.248  11.097  1.00  9.59           O  
ATOM    249  N   GLU A  64      47.571 -84.771   9.430  1.00 10.04           N  
ATOM    250  CA  GLU A  64      46.201 -84.548   8.972  1.00 10.94           C  
ATOM    251  C   GLU A  64      46.003 -83.164   8.367  1.00  9.74           C  
ATOM    252  O   GLU A  64      44.870 -82.695   8.254  1.00  9.42           O  
ATOM    253  N   SER A  65      47.076 -82.540   7.907  1.00  6.85           N  
ATOM    254  CA  SER A  65      46.973 -81.253   7.236  1.00  6.90           C  
ATOM    255  C   SER A  65      46.476 -81.501   5.820  1.00  4.72           C  
ATOM    256  O   SER A  65      46.761 -82.543   5.227  1.00  3.91           O  
ATOM    257  N   THR A  66      45.736 -80.533   5.271  1.00  4.48           N  
ATOM    258  CA  THR A  66      45.206 -80.643   3.914  1.00  3.80           C  
ATOM    259  C   THR A  66      45.919 -79.657   2.992  1.00  4.60           C  
ATOM    260  O   THR A  66      45.946 -78.453   3.243  1.00  5.33           O  
ATOM    261  N   LEU A  67      46.458 -80.191   1.900  1.00  4.17           N  
ATOM    262  CA  LEU A  67      47.143 -79.398   0.883  1.00  3.85           C  
ATOM    263  C   LEU A  67      46.198 -79.262  -0.302  1.00  3.80           C  
ATOM    264  O   LEU A  67      45.308 -80.088  -0.502  1.00  5.54           O  
ATOM    265  N   HIS A  68      46.408 -78.214  -1.101  1.00  2.94           N  
ATOM    266  CA  HIS A  68      45.595 -77.965  -2.287  1.00  4.17           C  
ATOM    267  C   HIS A  68      46.481 -78.084  -3.519  1.00  5.32           C  
ATOM    268  O   HIS A  68      47.560 -77.496  -3.571  1.00  7.70           O  
ATOM    269  N   LEU A  69      46.026 -78.842  -4.513  1.00  5.29           N  
ATOM    270  CA  LEU A  69      46.794 -79.025  -5.746  1.00  3.97           C  
ATOM    271  C   LEU A  69      46.149 -78.230  -6.872  1.00  5.07           C  
ATOM    272  O   LEU A  69      44.937 -78.297  -7.076  1.00  4.34           O  
ATOM    273  N   VAL A  70      46.978 -77.485  -7.626  1.00  4.29           N  
ATOM    274  CA  VAL A  70      46.545 -76.677  -8.762  1.00  6.26           C  
ATOM    275  C   VAL A  70      47.274 -77.184  -9.998  1.00  9.22           C  
ATOM    276  O   VAL A  70      48.490 -77.364 -10.000  1.00  9.36           O  
TER
ENDMDL
MODEL      7
ATOM      1  N   GLN A   2      50.043 -87.023   8.847  1.00  9.27           N  
ATOM      2  CA  GLN A   2      49.129 -87.088   7.708  1.00  9.07           C  
ATOM      3  C   GLN A   2      48.742 -85.683   7.268  1.00  8.72           C  
ATOM      4  O   GLN A   2      48.499 -84.796   8.090  1.00  8.22           O  
ATOM      5  N   ILE A   3      48.660 -85.507   5.946  1.00  5.87           N  
ATOM      6  CA  ILE A   3      48.272 -84.233   5.348  1.00  5.07           C  
ATOM      7  C   ILE A   3      47.170 -84.486   4.316  1.00  4.01           C  
ATOM      8  O   ILE A   3      46.929 -85.631   3.924  1.00  4.61           O  
ATOM      9  N   PHE A   4      46.508 -83.410   3.875  1.00  4.55           N  
ATOM     10  CA  PHE A   4      45.430 -83.532   2.879  1.00  4.68           C  
ATOM     11  C   PHE A   4      45.699 -82.649   1.664  1.00  5.30           C  
ATOM     12  O   PHE A   4      46.133 -81.513   1.800  1.00  5.58           O  
ATOM     13  N   VAL A   5      45.398 -83.174   0.472  1.00  4.44           N  
ATOM     14  CA  VAL A   5      45.567 -82.408  -0.771  1.00  3.87           C  
ATOM     15  C   VAL A   5      44.225 -82.327  -1.486  1.00  4.93           C  
ATOM     16  O   VAL A   5      43.614 -83.349  -1.790  1.00  6.84           O  
ATOM     17  N   LYS A   6      43.777 -81.107  -1.780  1.00  6.04           N  
ATOM     18  CA  LYS A   6      42.510 -80.920  -2.492  1.00  6.12           C  
ATOM     19  C   LYS A   6      42.778 -80.658  -3.975  1.00  6.57           C  
ATOM     20  O   LYS A   6      43.712 -79.937  -4.329  1.00  5.76           O  
ATOM     21  N   THR A   7      41.942 -81.248  -4.841  1.00  7.41           N  
ATOM     22  CA  THR A   7      42.082 -81.073  -6.286  1.00  7.48           C  
ATOM     23  C   THR A   7      41.094 -80.032  -6.799  1.00  8.75           C  
ATOM     24  O   THR A   7      40.191 -79.580  -6.094  1.00  8.58           O  
ATOM     25  N   LEU A   8      41.311 -79.681  -8.043  1.00  9.84           N  
ATOM     26  CA  LEU A   8      40.470 -78.693  -8.713  1.00 14.15           C  
ATOM     27  C   LEU A   8      39.032 -79.185  -8.833  1.00 17.37           C  
ATOM     28  O   LEU A   8      38.111 -78.382  -8.983  1.00 17.01           O  
ATOM     29  N   THR A   9      38.835 -80.507  -8.805  1.00 18.33           N  
ATOM     30  CA  THR A   9      37.489 -81.068  -8.954  1.00 19.24           C  
ATOM     31  C   THR A   9      36.783 -81.273  -7.616  1.00 19.48           C  
ATOM     32  O   THR A   9      35.630 -81.704  -7.577  1.00 23.14           O  
ATOM     33  N   GLY A  10      37.459 -80.926  -6.521  1.00 19.43           N  
ATOM     34  CA  GLY A  10      36.856 -81.042  -5.192  1.00 18.74           C  
ATOM     35  C   GLY A  10      37.168 -82.364  -4.496  1.00 17.62           C  
ATOM     36  O   GLY A  10      36.530 -82.726  -3.507  1.00 19.74           O  
ATOM     37  N   LYS A  11      38.165 -83.073  -5.021  1.00 13.56           N  
ATOM     38  CA  LYS A  11      38.560 -84.353  -4.428  1.00 11.91           C  
ATOM     39  C   LYS A  11      39.624 -84.119  -3.363  1.00 10.18           C  
ATOM     40  O   LYS A  11      40.469 -83.247  -3.533  1.00  9.10           O  
ATOM     41  N   THR A  12      39.612 -84.904  -2.280  1.00  9.63           N  
ATOM     42  CA  THR A  12      40.631 -84.751  -1.226  1.00  9.85           C  
ATOM     43  C   THR A  12      41.439 -86.042  -1.102  1.00 11.66           C  
ATOM     44  O   THR A  12      40.867 -87.122  -0.953  1.00 12.33           O  
ATOM     45  N   ILE A  13      42.772 -85.925  -1.136  1.00 10.42           N  
ATOM     46  CA  ILE A  13      43.648 -87.098  -0.997  1.00 11.84           C  
ATOM     47  C   ILE A  13      44.408 -87.025   0.324  1.00 10.55           C  
ATOM     48  O   ILE A  13      44.889 -85.962   0.715  1.00 11.92           O  
ATOM     49  N   THR A  14      44.539 -88.171   0.996  1.00  9.39           N  
ATOM     50  CA  THR A  14      45.273 -88.234   2.257  1.00  9.63           C  
ATOM     51  C   THR A  14      46.660 -88.805   1.987  1.00 11.20           C  
ATOM     52  O   THR A  14      46.796 -89.830   1.320  1.00 11.63           O  
ATOM     53  N   LEU A  15      47.689 -88.130   2.494  1.00  8.29           N  
ATOM     54  CA  LEU A  15      49.075 -88.569   2.288  1.00  9.03           C  
ATOM     55  C   LEU A  15      49.782 -88.720   3.634  1.00  8.59           C  
ATOM     56  O   LEU A  15      49.545 -87.939   4.556  1.00  7.79           O  
ATOM     57  N   GLU A  16      50.709 -89.676   3.719  1.00 11.04           N  
ATOM     58  CA  GLU A  16      51.509 -89.852   4.930  1.00 11.50           C  
ATOM     59  C   GLU A  16      52.865 -89.233   4.623  1.00 10.13           C  
ATOM     60  O   GLU A  16      53.523 -89.619   3.657  1.00  9.83           O  
ATOM     61  N   VAL A  17      53.270 -88.247   5.422  1.00  8.99           N  
ATOM     62  CA  VAL A  17      54.540 -87.559   5.192  1.00  8.85           C  
ATOM     63  C   VAL A  17      55.269 -87.269   6.496  1.00  8.04           C  
ATOM     64  O   VAL A  17      54.701 -87.348   7.585  1.00  8.99           O  
ATOM     65  N   GLU A  18      56.531 -86.882   6.346  1.00  7.29           N  
ATOM     66  CA  GLU A  18      57.376 -86.507   7.479  1.00  7.08           C  
ATOM     67  C   GLU A  18      57.786 -85.043   7.281  1.00  6.45           C  
ATOM     68  O   GLU A  18      57.879 -84.600   6.137  1.00  5.28           O  
ATOM     69  N   PRO A  19      58.014 -84.259   8.316  1.00  7.24           N  
ATOM     70  CA  PRO A  19      58.385 -82.835   8.115  1.00  7.07           C  
ATOM     71  C   PRO A  19      59.638 -82.657   7.259  1.00  6.65           C  
ATOM     72  O   PRO A  19      59.832 -81.605   6.646  1.00  6.37           O  
ATOM     73  N   SER A  20      60.492 -83.679   7.238  1.00  6.80           N  
ATOM     74  CA  SER A  20      61.735 -83.617   6.473  1.00  6.28           C  
ATOM     75  C   SER A  20      61.529 -84.014   5.015  1.00  8.45           C  
ATOM     76  O   SER A  20      62.470 -83.959   4.223  1.00  7.26           O  
ATOM     77  N   ASP A  21      60.307 -84.385   4.639  1.00  7.50           N  
ATOM     78  CA  ASP A  21      60.047 -84.745   3.251  1.00  7.70           C  
ATOM     79  C   ASP A  21      60.114 -83.479   2.416  1.00  7.08           C  
ATOM     80  O   ASP A  21      59.661 -82.402   2.829  1.00  8.11           O  
ATOM     81  N   THR A  22      60.658 -83.642   1.209  1.00  5.37           N  
ATOM     82  CA  THR A  22      60.763 -82.544   0.268  1.00  6.01           C  
ATOM     83  C   THR A  22      59.477 -82.425  -0.536  1.00  8.01           C  
ATOM     84  O   THR A  22      58.730 -83.387  -0.682  1.00  8.11           O  
ATOM     85  N   ILE A  23      59.251 -81.243  -1.077  1.00  8.32           N  
ATOM     86  CA  ILE A  23      58.076 -80.996  -1.905  1.00  9.92           C  
ATOM     87  C   ILE A  23      58.115 -81.916  -3.128  1.00 10.01           C  
ATOM     88  O   ILE A  23      57.091 -82.468  -3.524  1.00  8.71           O  
ATOM     89  N   GLU A  24      59.305 -82.103  -3.706  1.00  9.54           N  
ATOM     90  CA  GLU A  24      59.448 -82.993  -4.862  1.00 11.81           C  
ATOM     91  C   GLU A  24      59.013 -84.400  -4.460  1.00 11.14           C  
ATOM     92  O   GLU A  24      58.381 -85.107  -5.240  1.00 10.62           O  
ATOM     93  N   ASN A  25      59.354 -84.797  -3.238  1.00  9.43           N  
ATOM     94  CA  ASN A  25      58.971 -86.127  -2.769  1.00 10.96           C  
ATOM     95  C   ASN A  25      57.453 -86.208  -2.653  1.00  9.68           C  
ATOM     96  O   ASN A  25      56.850 -87.218  -3.006  1.00  9.33           O  
ATOM     97  N   VAL A  26      56.840 -85.129  -2.169  1.00  6.52           N  
ATOM     98  CA  VAL A  26      55.387 -85.089  -2.031  1.00  5.53           C  
ATOM     99  C   VAL A  26      54.736 -85.211  -3.408  1.00  4.42           C  
ATOM    100  O   VAL A  26      53.775 -85.965  -3.576  1.00  3.40           O  
ATOM    101  N   LYS A  27      55.264 -84.487  -4.406  1.00  2.64           N  
ATOM    102  CA  LYS A  27      54.719 -84.556  -5.756  1.00  4.14           C  
ATOM    103  C   LYS A  27      54.817 -85.990  -6.269  1.00  5.58           C  
ATOM    104  O   LYS A  27      53.913 -86.484  -6.939  1.00  4.11           O  
ATOM    105  N   ALA A  28      55.936 -86.641  -5.959  1.00  6.61           N  
ATOM    106  CA  ALA A  28      56.158 -88.011  -6.407  1.00  7.74           C  
ATOM    107  C   ALA A  28      55.110 -88.942  -5.810  1.00  9.17           C  
ATOM    108  O   ALA A  28      54.627 -89.854  -6.480  1.00 11.45           O  
ATOM    109  N   LYS A  29      54.748 -88.699  -4.558  1.00  8.96           N  
ATOM    110  CA  LYS A  29      53.737 -89.520  -3.905  1.00  7.90           C  
ATOM    111  C   LYS A  29      52.393 -89.341  -4.611  1.00  6.92           C  
ATOM    112  O   LYS A  29      51.667 -90.305  -4.829  1.00  6.87           O  
ATOM    113  N   ILE A  30      52.092 -88.096  -5.009  1.00  4.57           N  
ATOM    114  CA  ILE A  30      50.855 -87.794  -5.734  1.00  5.58           C  
ATOM    115  C   ILE A  30      50.864 -88.499  -7.095  1.00  7.26           C  
ATOM    116  O   ILE A  30      49.841 -89.021  -7.529  1.00  9.46           O  
ATOM    117  N   GLN A  31      52.015 -88.518  -7.763  1.00  7.06           N  
ATOM    118  CA  GLN A  31      52.122 -89.175  -9.067  1.00  8.67           C  
ATOM    119  C   GLN A  31      51.773 -90.651  -8.922  1.00 10.90           C  
ATOM    120  O   GLN A  31      51.059 -91.225  -9.745  1.00  9.63           O  
ATOM    121  N   ASP A  32      52.309 -91.252  -7.880  1.00 10.93           N  
ATOM    122  CA  ASP A  32      52.080 -92.669  -7.640  1.00 14.01           C  
ATOM    123  C   ASP A  32      50.596 -92.960  -7.413  1.00 14.04           C  
ATOM    124  O   ASP A  32      50.083 -93.987  -7.859  1.00 13.39           O  
ATOM    125  N   LYS A  33      49.922 -92.077  -6.678  1.00 14.22           N  
ATOM    126  CA  LYS A  33      48.509 -92.276  -6.350  1.00 14.00           C  
ATOM    127  C   LYS A  33      47.544 -91.869  -7.475  1.00 12.37           C  
ATOM    128  O   LYS A  33      46.531 -92.538  -7.679  1.00 12.17           O  
ATOM    129  N   GLU A  34      47.791 -90.734  -8.136  1.00 10.11           N  
ATOM    130  CA  GLU A  34      46.846 -90.223  -9.152  1.00 10.07           C  
ATOM    131  C   GLU A  34      47.330 -90.285 -10.608  1.00  9.32           C  
ATOM    132  O   GLU A  34      46.537 -90.114 -11.534  1.00 11.61           O  
ATOM    133  N   GLY A  35      48.611 -90.566 -10.809  1.00  7.22           N  
ATOM    134  CA  GLY A  35      49.149 -90.687 -12.168  1.00  6.29           C  
ATOM    135  C   GLY A  35      49.462 -89.334 -12.814  1.00  6.93           C  
ATOM    136  O   GLY A  35      49.736 -89.253 -14.011  1.00  7.41           O  
ATOM    137  N   ILE A  36      49.416 -88.282 -12.010  1.00  5.86           N  
ATOM    138  CA  ILE A  36      49.696 -86.931 -12.506  1.00  6.07           C  
ATOM    139  C   ILE A  36      51.215 -86.697 -12.512  1.00  6.36           C  
ATOM    140  O   ILE A  36      51.875 -86.973 -11.510  1.00  6.18           O  
ATOM    141  N   PRO A  37      51.799 -86.216 -13.595  1.00  8.65           N  
ATOM    142  CA  PRO A  37      53.278 -85.989 -13.648  1.00  9.18           C  
ATOM    143  C   PRO A  37      53.709 -84.739 -12.835  1.00  9.85           C  
ATOM    144  O   PRO A  37      53.087 -83.684 -12.954  1.00  8.51           O  
ATOM    145  N   PRO A  38      54.749 -84.837 -12.003  1.00  8.71           N  
ATOM    146  CA  PRO A  38      55.233 -83.685 -11.161  1.00  9.08           C  
ATOM    147  C   PRO A  38      55.453 -82.368 -11.923  1.00  9.28           C  
ATOM    148  O   PRO A  38      55.322 -81.295 -11.334  1.00  6.50           O  
ATOM    149  N   ASP A  39      55.817 -82.429 -13.193  1.00 11.20           N  
ATOM    150  CA  ASP A  39      56.081 -81.203 -13.949  1.00 14.96           C  
ATOM    151  C   ASP A  39      54.792 -80.444 -14.255  1.00 13.99           C  
ATOM    152  O   ASP A  39      54.825 -79.259 -14.583  1.00 13.75           O  
ATOM    153  N   GLN A  40      53.655 -81.131 -14.150  1.00 11.60           N  
ATOM    154  CA  GLN A  40      52.358 -80.506 -14.424  1.00 10.76           C  
ATOM    155  C   GLN A  40      51.639 -80.101 -13.142  1.00  8.01           C  
ATOM    156  O   GLN A  40      50.514 -79.602 -13.183  1.00  8.96           O  
ATOM    157  N   GLN A  41      52.271 -80.365 -12.005  1.00  6.52           N  
ATOM    158  CA  GLN A  41      51.654 -80.070 -10.708  1.00  3.87           C  
ATOM    159  C   GLN A  41      52.252 -78.859  -9.999  1.00  4.79           C  
ATOM    160  O   GLN A  41      53.469 -78.678  -9.946  1.00  6.34           O  
ATOM    161  N   ARG A  42      51.358 -78.076  -9.394  1.00  5.73           N  
ATOM    162  CA  ARG A  42      51.734 -76.909  -8.600  1.00  6.97           C  
ATOM    163  C   ARG A  42      51.089 -77.043  -7.225  1.00  7.15           C  
ATOM    164  O   ARG A  42      49.871 -77.170  -7.117  1.00  7.33           O  
ATOM    165  N   LEU A  43      51.904 -77.025  -6.173  1.00  4.65           N  
ATOM    166  CA  LEU A  43      51.395 -77.157  -4.804  1.00  3.51           C  
ATOM    167  C   LEU A  43      51.385 -75.803  -4.119  1.00  5.56           C  
ATOM    168  O   LEU A  43      52.368 -75.063  -4.153  1.00  4.19           O  
ATOM    169  N   ILE A  44      50.239 -75.475  -3.526  1.00  4.58           N  
ATOM    170  CA  ILE A  44      50.061 -74.190  -2.858  1.00  5.55           C  
ATOM    171  C   ILE A  44      49.581 -74.366  -1.423  1.00  5.46           C  
ATOM    172  O   ILE A  44      48.678 -75.158  -1.143  1.00  6.04           O  
ATOM    173  N   PHE A  45      50.191 -73.594  -0.524  1.00  6.75           N  
ATOM    174  CA  PHE A  45      49.831 -73.624   0.892  1.00  4.70           C  
ATOM    175  C   PHE A  45      49.795 -72.203   1.441  1.00  6.34           C  
ATOM    176  O   PHE A  45      50.745 -71.437   1.277  1.00  5.45           O  
ATOM    177  N   ALA A  46      48.697 -71.863   2.098  1.00  6.53           N  
ATOM    178  CA  ALA A  46      48.531 -70.540   2.685  1.00  7.15           C  
ATOM    179  C   ALA A  46      48.844 -69.427   1.686  1.00  9.00           C  
ATOM    180  O   ALA A  46      49.410 -68.395   2.045  1.00 11.15           O  
ATOM    181  N   GLY A  47      48.410 -69.627   0.440  1.00  9.35           N  
ATOM    182  CA  GLY A  47      48.588 -68.610  -0.595  1.00 11.68           C  
ATOM    183  C   GLY A  47      49.985 -68.579  -1.212  1.00 11.14           C  
ATOM    184  O   GLY A  47      50.250 -67.739  -2.072  1.00 13.93           O  
ATOM    185  N   LYS A  48      50.895 -69.461  -0.776  1.00 10.47           N  
ATOM    186  CA  LYS A  48      52.266 -69.463  -1.313  1.00  8.82           C  
ATOM    187  C   LYS A  48      52.554 -70.728  -2.123  1.00  7.68           C  
ATOM    188  O   LYS A  48      52.196 -71.832  -1.714  1.00  6.47           O  
ATOM    189  N   GLN A  49      53.241 -70.561  -3.256  1.00  8.89           N  
ATOM    190  CA  GLN A  49      53.610 -71.709  -4.082  1.00  7.18           C  
ATOM    191  C   GLN A  49      54.818 -72.393  -3.443  1.00  8.23           C  
ATOM    192  O   GLN A  49      55.808 -71.736  -3.121  1.00  9.70           O  
ATOM    193  N   LEU A  50      54.735 -73.708  -3.254  1.00  6.51           N  
ATOM    194  CA  LEU A  50      55.835 -74.456  -2.642  1.00  7.41           C  
ATOM    195  C   LEU A  50      56.860 -74.894  -3.694  1.00  8.27           C  
ATOM    196  O   LEU A  50      56.496 -75.347  -4.779  1.00  8.34           O  
ATOM    197  N   GLU A  51      58.149 -74.736  -3.364  1.00  9.43           N  
ATOM    198  CA  GLU A  51      59.226 -75.100  -4.300  1.00 11.90           C  
ATOM    199  C   GLU A  51      59.707 -76.540  -4.099  1.00 11.49           C  
ATOM    200  O   GLU A  51      59.639 -77.083  -2.999  1.00  9.88           O  
ATOM    201  N   ASP A  52      60.168 -77.149  -5.202  1.00 12.71           N  
ATOM    202  CA  ASP A  52      60.633 -78.542  -5.186  1.00 16.56           C  
ATOM    203  C   ASP A  52      61.917 -78.750  -4.367  1.00 15.83           C  
ATOM    204  O   ASP A  52      62.219 -79.878  -3.978  1.00 17.21           O  
ATOM    205  N   GLY A  53      62.682 -77.690  -4.119  1.00 15.00           N  
ATOM    206  CA  GLY A  53      63.937 -77.820  -3.357  1.00 11.77           C  
ATOM    207  C   GLY A  53      63.766 -77.537  -1.855  1.00 11.10           C  
ATOM    208  O   GLY A  53      64.747 -77.559  -1.112  1.00 11.25           O  
ATOM    209  N   ARG A  54      62.541 -77.280  -1.409  1.00  8.53           N  
ATOM    210  CA  ARG A  54      62.294 -77.004   0.024  1.00  9.05           C  
ATOM    211  C   ARG A  54      61.506 -78.148   0.688  1.00  8.96           C  
ATOM    212  O   ARG A  54      60.956 -79.010   0.001  1.00 11.60           O  
ATOM    213  N   THR A  55      61.466 -78.156   2.040  1.00  9.05           N  
ATOM    214  CA  THR A  55      60.742 -79.201   2.795  1.00  9.03           C  
ATOM    215  C   THR A  55      59.452 -78.671   3.430  1.00  8.15           C  
ATOM    216  O   THR A  55      59.226 -77.466   3.518  1.00  5.91           O  
ATOM    217  N   LEU A  56      58.625 -79.616   3.897  1.00  6.91           N  
ATOM    218  CA  LEU A  56      57.360 -79.276   4.565  1.00  8.29           C  
ATOM    219  C   LEU A  56      57.606 -78.428   5.813  1.00  8.05           C  
ATOM    220  O   LEU A  56      56.864 -77.480   6.071  1.00 10.17           O  
ATOM    221  N   SER A  57      58.623 -78.778   6.609  1.00  8.92           N  
ATOM    222  CA  SER A  57      58.877 -78.019   7.833  1.00  9.00           C  
ATOM    223  C   SER A  57      59.217 -76.561   7.535  1.00  9.44           C  
ATOM    224  O   SER A  57      58.938 -75.676   8.345  1.00 10.91           O  
ATOM    225  N   ASP A  58      59.821 -76.313   6.390  1.00  9.11           N  
ATOM    226  CA  ASP A  58      60.192 -74.949   6.028  1.00  7.91           C  
ATOM    227  C   ASP A  58      58.953 -74.064   5.905  1.00  9.12           C  
ATOM    228  O   ASP A  58      59.023 -72.854   6.122  1.00  8.61           O  
ATOM    229  N   TYR A  59      57.814 -74.670   5.555  1.00  7.97           N  
ATOM    230  CA  TYR A  59      56.559 -73.920   5.405  1.00  8.45           C  
ATOM    231  C   TYR A  59      55.669 -74.061   6.638  1.00 10.98           C  
ATOM    232  O   TYR A  59      54.485 -73.728   6.596  1.00 12.95           O  
ATOM    233  N   ASN A  60      56.242 -74.557   7.735  1.00 12.38           N  
ATOM    234  CA  ASN A  60      55.514 -74.749   8.985  1.00 13.94           C  
ATOM    235  C   ASN A  60      54.203 -75.502   8.774  1.00 14.16           C  
ATOM    236  O   ASN A  60      53.195 -75.195   9.411  1.00 14.26           O  
ATOM    237  N   ILE A  61      54.227 -76.510   7.905  1.00 11.08           N  
ATOM    238  CA  ILE A  61      53.032 -77.317   7.662  1.00 11.78           C  
ATOM    239  C   ILE A  61      52.935 -78.346   8.786  1.00 13.74           C  
ATOM    240  O   ILE A  61      53.870 -79.112   9.021  1.00 14.60           O  
ATOM    241  N   GLN A  62      51.812 -78.319   9.517  1.00 13.97           N  
ATOM    242  CA  GLN A  62      51.602 -79.206  10.670  1.00 15.52           C  
ATOM    243  C   GLN A  62      50.600 -80.319  10.364  1.00 13.94           C  
ATOM    244  O   GLN A  62      49.931 -80.311   9.330  1.00 12.15           O  
ATOM    245  N   LYS A  63      50.534 -81.288  11.277  1.00 11.73           N  
ATOM    246  CA  LYS A  63      49.631 -82.417  11.077  1.00 11.97           C  
ATOM    247  C   LYS A  63      48.214 -81.949  10.752  1.00 10.41           C  
ATOM    248  O   LYS A  63      47.729 -80.955  11.294  1.00  9.59           O  
ATOM    249  N   GLU A  64      47.576 -82.675   9.838  1.00 10.04           N  
ATOM    250  CA  GLU A  64      46.221 -82.366   9.379  1.00 10.94           C  
ATOM    251  C   GLU A  64      46.149 -81.060   8.600  1.00  9.74           C  
ATOM    252  O   GLU A  64      45.071 -80.486   8.453  1.00  9.42           O  
ATOM    253  N   SER A  65      47.265 -80.627   8.036  1.00  6.85           N  
ATOM    254  CA  SER A  65      47.276 -79.438   7.200  1.00  6.90           C  
ATOM    255  C   SER A  65      46.709 -79.816   5.840  1.00  4.72           C  
ATOM    256  O   SER A  65      46.880 -80.946   5.383  1.00  3.91           O  
ATOM    257  N   THR A  66      46.041 -78.864   5.183  1.00  4.48           N  
ATOM    258  CA  THR A  66      45.459 -79.101   3.863  1.00  3.80           C  
ATOM    259  C   THR A  66      46.211 -78.278   2.821  1.00  4.60           C  
ATOM    260  O   THR A  66      46.289 -77.053   2.917  1.00  5.33           O  
ATOM    261  N   LEU A  67      46.718 -78.962   1.799  1.00  4.17           N  
ATOM    262  CA  LEU A  67      47.418 -78.304   0.700  1.00  3.85           C  
ATOM    263  C   LEU A  67      46.482 -78.284  -0.489  1.00  3.80           C  
ATOM    264  O   LEU A  67      45.543 -79.078  -0.575  1.00  5.54           O  
ATOM    265  N   HIS A  68      46.756 -77.373  -1.420  1.00  2.94           N  
ATOM    266  CA  HIS A  68      45.956 -77.242  -2.628  1.00  4.17           C  
ATOM    267  C   HIS A  68      46.796 -77.630  -3.836  1.00  5.32           C  
ATOM    268  O   HIS A  68      47.934 -77.181  -3.980  1.00  7.70           O  
ATOM    269  N   LEU A  69      46.236 -78.465  -4.706  1.00  5.29           N  
ATOM    270  CA  LEU A  69      46.939 -78.913  -5.907  1.00  3.97           C  
ATOM    271  C   LEU A  69      46.346 -78.203  -7.112  1.00  5.07           C  
ATOM    272  O   LEU A  69      45.128 -78.162  -7.283  1.00  4.34           O  
ATOM    273  N   VAL A  70      47.220 -77.661  -7.968  1.00  4.29           N  
ATOM    274  CA  VAL A  70      46.835 -76.968  -9.188  1.00  6.26           C  
ATOM    275  C   VAL A  70      47.471 -77.720 -10.347  1.00  9.22           C  
ATOM    276  O   VAL A  70      48.622 -78.145 -10.278  1.00  9.36           O  
TER
ENDMDL
MODEL      8
ATOM      1  N   GLN A   2      49.530 -86.590   8.866  1.00  9.27           N  
ATOM      2  CA  GLN A   2      48.640 -86.598   7.704  1.00  9.07           C  
ATOM      3  C   GLN A   2      48.377 -85.177   7.228  1.00  8.72           C  
ATOM      4  O   GLN A   2      48.192 -84.258   8.029  1.00  8.22           O  
ATOM      5  N   ILE A   3      48.336 -85.020   5.901  1.00  5.87           N  
ATOM      6  CA  ILE A   3      48.064 -83.728   5.275  1.00  5.07           C  
ATOM      7  C   ILE A   3      46.965 -83.892   4.225  1.00  4.01           C  
ATOM      8  O   ILE A   3      46.614 -85.014   3.850  1.00  4.61           O  
ATOM      9  N   PHE A   4      46.433 -82.762   3.746  1.00  4.55           N  
ATOM     10  CA  PHE A   4      45.374 -82.787   2.725  1.00  4.68           C  
ATOM     11  C   PHE A   4      45.774 -81.976   1.497  1.00  5.30           C  
ATOM     12  O   PHE A   4      46.297 -80.880   1.624  1.00  5.58           O  
ATOM     13  N   VAL A   5      45.470 -82.501   0.304  1.00  4.44           N  
ATOM     14  CA  VAL A   5      45.748 -81.781  -0.949  1.00  3.87           C  
ATOM     15  C   VAL A   5      44.432 -81.599  -1.700  1.00  4.93           C  
ATOM     16  O   VAL A   5      43.748 -82.575  -2.002  1.00  6.84           O  
ATOM     17  N   LYS A   6      44.086 -80.354  -2.025  1.00  6.04           N  
ATOM     18  CA  LYS A   6      42.850 -80.081  -2.772  1.00  6.12           C  
ATOM     19  C   LYS A   6      43.155 -79.860  -4.252  1.00  6.57           C  
ATOM     20  O   LYS A   6      44.169 -79.254  -4.605  1.00  5.76           O  
ATOM     21  N   THR A   7      42.256 -80.352  -5.119  1.00  7.41           N  
ATOM     22  CA  THR A   7      42.421 -80.202  -6.565  1.00  7.48           C  
ATOM     23  C   THR A   7      41.521 -79.092  -7.106  1.00  8.75           C  
ATOM     24  O   THR A   7      40.597 -78.620  -6.444  1.00  8.58           O  
ATOM     25  N   LEU A   8      41.830 -78.710  -8.318  1.00  9.84           N  
ATOM     26  CA  LEU A   8      41.074 -77.659  -8.998  1.00 14.15           C  
ATOM     27  C   LEU A   8      39.627 -78.083  -9.232  1.00 17.37           C  
ATOM     28  O   LEU A   8      38.768 -77.239  -9.487  1.00 17.01           O  
ATOM     29  N   THR A   9      39.352 -79.391  -9.170  1.00 18.33           N  
ATOM     30  CA  THR A   9      37.991 -79.884  -9.409  1.00 19.24           C  
ATOM     31  C   THR A   9      37.201 -80.050  -8.112  1.00 19.48           C  
ATOM     32  O   THR A   9      36.040 -80.458  -8.134  1.00 23.14           O  
ATOM     33  N   GLY A  10      37.816 -79.685  -6.986  1.00 19.43           N  
ATOM     34  CA  GLY A  10      37.132 -79.750  -5.693  1.00 18.74           C  
ATOM     35  C   GLY A  10      37.345 -81.068  -4.954  1.00 17.62           C  
ATOM     36  O   GLY A  10      36.642 -81.370  -3.990  1.00 19.74           O  
ATOM     37  N   LYS A  11      38.324 -81.844  -5.409  1.00 13.56           N  
ATOM     38  CA  LYS A  11      38.612 -83.126  -4.762  1.00 11.91           C  
ATOM     39  C   LYS A  11      39.645 -82.936  -3.655  1.00 10.18           C  
ATOM     40  O   LYS A  11      40.579 -82.160  -3.823  1.00  9.10           O  
ATOM     41  N   THR A  12      39.506 -83.667  -2.542  1.00  9.63           N  
ATOM     42  CA  THR A  12      40.490 -83.565  -1.448  1.00  9.85           C  
ATOM     43  C   THR A  12      41.163 -84.925  -1.268  1.00 11.66           C  
ATOM     44  O   THR A  12      40.482 -85.936  -1.096  1.00 12.33           O  
ATOM     45  N   ILE A  13      42.500 -84.949  -1.279  1.00 10.42           N  
ATOM     46  CA  ILE A  13      43.242 -86.203  -1.083  1.00 11.84           C  
ATOM     47  C   ILE A  13      43.978 -86.165   0.251  1.00 10.55           C  
ATOM     48  O   ILE A  13      44.552 -85.144   0.623  1.00 11.92           O  
ATOM     49  N   THR A  14      43.978 -87.297   0.955  1.00  9.39           N  
ATOM     50  CA  THR A  14      44.674 -87.393   2.237  1.00  9.63           C  
ATOM     51  C   THR A  14      45.971 -88.161   2.028  1.00 11.20           C  
ATOM     52  O   THR A  14      45.975 -89.215   1.393  1.00 11.63           O  
ATOM     53  N   LEU A  15      47.077 -87.624   2.543  1.00  8.29           N  
ATOM     54  CA  LEU A  15      48.384 -88.270   2.381  1.00  9.03           C  
ATOM     55  C   LEU A  15      49.066 -88.440   3.730  1.00  8.59           C  
ATOM     56  O   LEU A  15      48.907 -87.608   4.620  1.00  7.79           O  
ATOM     57  N   GLU A  16      49.885 -89.485   3.853  1.00 11.04           N  
ATOM     58  CA  GLU A  16      50.656 -89.706   5.077  1.00 11.50           C  
ATOM     59  C   GLU A  16      52.076 -89.247   4.777  1.00 10.13           C  
ATOM     60  O   GLU A  16      52.700 -89.727   3.831  1.00  9.83           O  
ATOM     61  N   VAL A  17      52.577 -88.295   5.562  1.00  8.99           N  
ATOM     62  CA  VAL A  17      53.920 -87.758   5.339  1.00  8.85           C  
ATOM     63  C   VAL A  17      54.657 -87.522   6.649  1.00  8.04           C  
ATOM     64  O   VAL A  17      54.066 -87.506   7.728  1.00  8.99           O  
ATOM     65  N   GLU A  18      55.959 -87.282   6.516  1.00  7.29           N  
ATOM     66  CA  GLU A  18      56.818 -86.973   7.658  1.00  7.08           C  
ATOM     67  C   GLU A  18      57.376 -85.562   7.442  1.00  6.45           C  
ATOM     68  O   GLU A  18      57.505 -85.142   6.292  1.00  5.28           O  
ATOM     69  N   PRO A  19      57.698 -84.798   8.465  1.00  7.24           N  
ATOM     70  CA  PRO A  19      58.218 -83.425   8.243  1.00  7.07           C  
ATOM     71  C   PRO A  19      59.501 -83.400   7.413  1.00  6.65           C  
ATOM     72  O   PRO A  19      59.824 -82.388   6.789  1.00  6.37           O  
ATOM     73  N   SER A  20      60.242 -84.509   7.430  1.00  6.80           N  
ATOM     74  CA  SER A  20      61.502 -84.593   6.694  1.00  6.28           C  
ATOM     75  C   SER A  20      61.290 -85.013   5.243  1.00  8.45           C  
ATOM     76  O   SER A  20      62.248 -85.073   4.472  1.00  7.26           O  
ATOM     77  N   ASP A  21      60.044 -85.279   4.851  1.00  7.50           N  
ATOM     78  CA  ASP A  21      59.774 -85.656   3.471  1.00  7.70           C  
ATOM     79  C   ASP A  21      59.972 -84.427   2.607  1.00  7.08           C  
ATOM     80  O   ASP A  21      59.631 -83.299   2.987  1.00  8.11           O  
ATOM     81  N   THR A  22      60.501 -84.683   1.409  1.00  5.37           N  
ATOM     82  CA  THR A  22      60.722 -83.631   0.438  1.00  6.01           C  
ATOM     83  C   THR A  22      59.466 -83.425  -0.390  1.00  8.01           C  
ATOM     84  O   THR A  22      58.644 -84.327  -0.531  1.00  8.11           O  
ATOM     85  N   ILE A  23      59.351 -82.243  -0.956  1.00  8.32           N  
ATOM     86  CA  ILE A  23      58.220 -81.913  -1.810  1.00  9.92           C  
ATOM     87  C   ILE A  23      58.193 -82.862  -3.012  1.00 10.01           C  
ATOM     88  O   ILE A  23      57.126 -83.308  -3.425  1.00  8.71           O  
ATOM     89  N   GLU A  24      59.368 -83.196  -3.552  1.00  9.54           N  
ATOM     90  CA  GLU A  24      59.439 -84.132  -4.679  1.00 11.81           C  
ATOM     91  C   GLU A  24      58.842 -85.475  -4.256  1.00 11.14           C  
ATOM     92  O   GLU A  24      58.135 -86.115  -5.031  1.00 10.62           O  
ATOM     93  N   ASN A  25      59.119 -85.888  -3.023  1.00  9.43           N  
ATOM     94  CA  ASN A  25      58.567 -87.155  -2.540  1.00 10.96           C  
ATOM     95  C   ASN A  25      57.047 -87.040  -2.473  1.00  9.68           C  
ATOM     96  O   ASN A  25      56.331 -87.972  -2.831  1.00  9.33           O  
ATOM     97  N   VAL A  26      56.563 -85.883  -2.025  1.00  6.52           N  
ATOM     98  CA  VAL A  26      55.123 -85.661  -1.933  1.00  5.53           C  
ATOM     99  C   VAL A  26      54.493 -85.740  -3.325  1.00  4.42           C  
ATOM    100  O   VAL A  26      53.446 -86.369  -3.495  1.00  3.40           O  
ATOM    101  N   LYS A  27      55.127 -85.118  -4.333  1.00  2.64           N  
ATOM    102  CA  LYS A  27      54.601 -85.157  -5.694  1.00  4.14           C  
ATOM    103  C   LYS A  27      54.521 -86.604  -6.168  1.00  5.58           C  
ATOM    104  O   LYS A  27      53.576 -86.995  -6.846  1.00  4.11           O  
ATOM    105  N   ALA A  28      55.542 -87.385  -5.822  1.00  6.61           N  
ATOM    106  CA  ALA A  28      55.592 -88.780  -6.239  1.00  7.74           C  
ATOM    107  C   ALA A  28      54.421 -89.554  -5.648  1.00  9.17           C  
ATOM    108  O   ALA A  28      53.836 -90.408  -6.313  1.00 11.45           O  
ATOM    109  N   LYS A  29      54.065 -89.239  -4.413  1.00  8.96           N  
ATOM    110  CA  LYS A  29      52.939 -89.905  -3.776  1.00  7.90           C  
ATOM    111  C   LYS A  29      51.645 -89.545  -4.510  1.00  6.92           C  
ATOM    112  O   LYS A  29      50.777 -90.395  -4.708  1.00  6.87           O  
ATOM    113  N   ILE A  30      51.543 -88.278  -4.949  1.00  4.57           N  
ATOM    114  CA  ILE A  30      50.374 -87.819  -5.704  1.00  5.58           C  
ATOM    115  C   ILE A  30      50.318 -88.544  -7.056  1.00  7.26           C  
ATOM    116  O   ILE A  30      49.244 -88.931  -7.504  1.00  9.46           O  
ATOM    117  N   GLN A  31      51.470 -88.730  -7.704  1.00  7.06           N  
ATOM    118  CA  GLN A  31      51.514 -89.416  -9.003  1.00  8.67           C  
ATOM    119  C   GLN A  31      50.967 -90.828  -8.846  1.00 10.90           C  
ATOM    120  O   GLN A  31      50.187 -91.308  -9.668  1.00  9.63           O  
ATOM    121  N   ASP A  32      51.405 -91.479  -7.794  1.00 10.93           N  
ATOM    122  CA  ASP A  32      50.975 -92.843  -7.542  1.00 14.01           C  
ATOM    123  C   ASP A  32      49.458 -92.906  -7.373  1.00 14.04           C  
ATOM    124  O   ASP A  32      48.812 -93.854  -7.818  1.00 13.39           O  
ATOM    125  N   LYS A  33      48.907 -91.909  -6.685  1.00 14.22           N  
ATOM    126  CA  LYS A  33      47.471 -91.870  -6.403  1.00 14.00           C  
ATOM    127  C   LYS A  33      46.611 -91.355  -7.569  1.00 12.37           C  
ATOM    128  O   LYS A  33      45.509 -91.862  -7.780  1.00 12.17           O  
ATOM    129  N   GLU A  34      47.051 -90.296  -8.256  1.00 10.11           N  
ATOM    130  CA  GLU A  34      46.222 -89.677  -9.312  1.00 10.07           C  
ATOM    131  C   GLU A  34      46.724 -89.840 -10.752  1.00  9.32           C  
ATOM    132  O   GLU A  34      45.973 -89.613 -11.700  1.00 11.61           O  
ATOM    133  N   GLY A  35      47.971 -90.262 -10.916  1.00  7.22           N  
ATOM    134  CA  GLY A  35      48.520 -90.480 -12.258  1.00  6.29           C  
ATOM    135  C   GLY A  35      49.001 -89.188 -12.925  1.00  6.93           C  
ATOM    136  O   GLY A  35      49.303 -89.166 -14.119  1.00  7.41           O  
ATOM    137  N   ILE A  36      49.067 -88.121 -12.142  1.00  5.86           N  
ATOM    138  CA  ILE A  36      49.511 -86.822 -12.656  1.00  6.07           C  
ATOM    139  C   ILE A  36      51.048 -86.748 -12.605  1.00  6.36           C  
ATOM    140  O   ILE A  36      51.615 -86.784 -11.512  1.00  6.18           O  
ATOM    141  N   PRO A  37      51.753 -86.651 -13.722  1.00  8.65           N  
ATOM    142  CA  PRO A  37      53.247 -86.581 -13.685  1.00  9.18           C  
ATOM    143  C   PRO A  37      53.762 -85.377 -12.851  1.00  9.85           C  
ATOM    144  O   PRO A  37      53.246 -84.268 -12.989  1.00  8.51           O  
ATOM    145  N   PRO A  38      54.757 -85.572 -11.983  1.00  8.71           N  
ATOM    146  CA  PRO A  38      55.316 -84.470 -11.122  1.00  9.08           C  
ATOM    147  C   PRO A  38      55.674 -83.186 -11.888  1.00  9.28           C  
ATOM    148  O   PRO A  38      55.615 -82.098 -11.314  1.00  6.50           O  
ATOM    149  N   ASP A  39      56.074 -83.291 -13.142  1.00 11.20           N  
ATOM    150  CA  ASP A  39      56.463 -82.096 -13.891  1.00 14.96           C  
ATOM    151  C   ASP A  39      55.254 -81.230 -14.239  1.00 13.99           C  
ATOM    152  O   ASP A  39      55.407 -80.066 -14.611  1.00 13.75           O  
ATOM    153  N   GLN A  40      54.051 -81.797 -14.121  1.00 11.60           N  
ATOM    154  CA  GLN A  40      52.824 -81.054 -14.433  1.00 10.76           C  
ATOM    155  C   GLN A  40      52.140 -80.531 -13.170  1.00  8.01           C  
ATOM    156  O   GLN A  40      51.066 -79.934 -13.243  1.00  8.96           O  
ATOM    157  N   GLN A  41      52.737 -80.799 -12.011  1.00  6.52           N  
ATOM    158  CA  GLN A  41      52.138 -80.390 -10.733  1.00  3.87           C  
ATOM    159  C   GLN A  41      52.849 -79.219 -10.051  1.00  4.79           C  
ATOM    160  O   GLN A  41      54.077 -79.156  -9.990  1.00  6.34           O  
ATOM    161  N   ARG A  42      52.030 -78.328  -9.483  1.00  5.73           N  
ATOM    162  CA  ARG A  42      52.507 -77.172  -8.720  1.00  6.97           C  
ATOM    163  C   ARG A  42      51.829 -77.194  -7.351  1.00  7.15           C  
ATOM    164  O   ARG A  42      50.604 -77.212  -7.266  1.00  7.33           O  
ATOM    165  N   LEU A  43      52.617 -77.203  -6.280  1.00  4.65           N  
ATOM    166  CA  LEU A  43      52.069 -77.234  -4.918  1.00  3.51           C  
ATOM    167  C   LEU A  43      52.217 -75.872  -4.250  1.00  5.56           C  
ATOM    168  O   LEU A  43      53.294 -75.275  -4.250  1.00  4.19           O  
ATOM    169  N   ILE A  44      51.109 -75.389  -3.684  1.00  4.58           N  
ATOM    170  CA  ILE A  44      51.085 -74.089  -3.005  1.00  5.55           C  
ATOM    171  C   ILE A  44      50.591 -74.243  -1.567  1.00  5.46           C  
ATOM    172  O   ILE A  44      49.626 -74.965  -1.296  1.00  6.04           O  
ATOM    173  N   PHE A  45      51.241 -73.509  -0.663  1.00  6.75           N  
ATOM    174  CA  PHE A  45      50.859 -73.498   0.747  1.00  4.70           C  
ATOM    175  C   PHE A  45      50.941 -72.071   1.272  1.00  6.34           C  
ATOM    176  O   PHE A  45      51.965 -71.403   1.131  1.00  5.45           O  
ATOM    177  N   ALA A  46      49.858 -71.614   1.882  1.00  6.53           N  
ATOM    178  CA  ALA A  46      49.803 -70.271   2.436  1.00  7.15           C  
ATOM    179  C   ALA A  46      50.262 -69.221   1.422  1.00  9.00           C  
ATOM    180  O   ALA A  46      50.913 -68.239   1.779  1.00 11.15           O  
ATOM    181  N   GLY A  47      49.858 -69.411   0.164  1.00  9.35           N  
ATOM    182  CA  GLY A  47      50.172 -68.443  -0.887  1.00 11.68           C  
ATOM    183  C   GLY A  47      51.579 -68.574  -1.476  1.00 11.14           C  
ATOM    184  O   GLY A  47      51.942 -67.789  -2.352  1.00 13.93           O  
ATOM    185  N   LYS A  48      52.387 -69.533  -1.005  1.00 10.47           N  
ATOM    186  CA  LYS A  48      53.759 -69.685  -1.522  1.00  8.82           C  
ATOM    187  C   LYS A  48      53.927 -70.989  -2.305  1.00  7.68           C  
ATOM    188  O   LYS A  48      53.447 -72.042  -1.885  1.00  6.47           O  
ATOM    189  N   GLN A  49      54.651 -70.915  -3.424  1.00  8.89           N  
ATOM    190  CA  GLN A  49      54.915 -72.107  -4.227  1.00  7.18           C  
ATOM    191  C   GLN A  49      56.036 -72.893  -3.557  1.00  8.23           C  
ATOM    192  O   GLN A  49      57.086 -72.338  -3.233  1.00  9.70           O  
ATOM    193  N   LEU A  50      55.806 -74.182  -3.340  1.00  6.51           N  
ATOM    194  CA  LEU A  50      56.804 -75.031  -2.694  1.00  7.41           C  
ATOM    195  C   LEU A  50      57.782 -75.613  -3.718  1.00  8.27           C  
ATOM    196  O   LEU A  50      57.380 -76.049  -4.797  1.00  8.34           O  
ATOM    197  N   GLU A  51      59.076 -75.603  -3.371  1.00  9.43           N  
ATOM    198  CA  GLU A  51      60.108 -76.123  -4.282  1.00 11.90           C  
ATOM    199  C   GLU A  51      60.371 -77.611  -4.052  1.00 11.49           C  
ATOM    200  O   GLU A  51      60.184 -78.129  -2.951  1.00  9.88           O  
ATOM    201  N   ASP A  52      60.761 -78.296  -5.134  1.00 12.71           N  
ATOM    202  CA  ASP A  52      60.998 -79.739  -5.083  1.00 16.56           C  
ATOM    203  C   ASP A  52      62.236 -80.122  -4.254  1.00 15.83           C  
ATOM    204  O   ASP A  52      62.357 -81.269  -3.826  1.00 17.21           O  
ATOM    205  N   GLY A  53      63.154 -79.183  -4.035  1.00 15.00           N  
ATOM    206  CA  GLY A  53      64.375 -79.475  -3.261  1.00 11.77           C  
ATOM    207  C   GLY A  53      64.233 -79.133  -1.769  1.00 11.10           C  
ATOM    208  O   GLY A  53      65.196 -79.267  -1.013  1.00 11.25           O  
ATOM    209  N   ARG A  54      63.050 -78.704  -1.346  1.00  8.53           N  
ATOM    210  CA  ARG A  54      62.826 -78.360   0.076  1.00  9.05           C  
ATOM    211  C   ARG A  54      61.888 -79.376   0.759  1.00  8.96           C  
ATOM    212  O   ARG A  54      61.221 -80.163   0.086  1.00 11.60           O  
ATOM    213  N   THR A  55      61.847 -79.352   2.111  1.00  9.05           N  
ATOM    214  CA  THR A  55      60.985 -80.275   2.883  1.00  9.03           C  
ATOM    215  C   THR A  55      59.773 -79.565   3.487  1.00  8.15           C  
ATOM    216  O   THR A  55      59.708 -78.339   3.546  1.00  5.91           O  
ATOM    217  N   LEU A  56      58.826 -80.382   3.961  1.00  6.91           N  
ATOM    218  CA  LEU A  56      57.612 -79.861   4.603  1.00  8.29           C  
ATOM    219  C   LEU A  56      57.962 -79.023   5.833  1.00  8.05           C  
ATOM    220  O   LEU A  56      57.360 -77.973   6.057  1.00 10.17           O  
ATOM    221  N   SER A  57      58.914 -79.492   6.651  1.00  8.92           N  
ATOM    222  CA  SER A  57      59.264 -78.746   7.859  1.00  9.00           C  
ATOM    223  C   SER A  57      59.807 -77.359   7.533  1.00  9.44           C  
ATOM    224  O   SER A  57      59.645 -76.424   8.316  1.00 10.91           O  
ATOM    225  N   ASP A  58      60.452 -77.228   6.389  1.00  9.11           N  
ATOM    226  CA  ASP A  58      61.013 -75.940   5.999  1.00  7.91           C  
ATOM    227  C   ASP A  58      59.907 -74.902   5.841  1.00  9.12           C  
ATOM    228  O   ASP A  58      60.137 -73.707   6.028  1.00  8.61           O  
ATOM    229  N   TYR A  59      58.700 -75.360   5.493  1.00  7.97           N  
ATOM    230  CA  TYR A  59      57.562 -74.452   5.310  1.00  8.45           C  
ATOM    231  C   TYR A  59      56.652 -74.437   6.535  1.00 10.98           C  
ATOM    232  O   TYR A  59      55.525 -73.945   6.471  1.00 12.95           O  
ATOM    233  N   ASN A  60      57.146 -74.969   7.654  1.00 12.38           N  
ATOM    234  CA  ASN A  60      56.396 -75.018   8.903  1.00 13.94           C  
ATOM    235  C   ASN A  60      54.994 -75.592   8.708  1.00 14.16           C  
ATOM    236  O   ASN A  60      54.036 -75.131   9.329  1.00 14.26           O  
ATOM    237  N   ILE A  61      54.883 -76.617   7.868  1.00 11.08           N  
ATOM    238  CA  ILE A  61      53.591 -77.263   7.635  1.00 11.78           C  
ATOM    239  C   ILE A  61      53.341 -78.247   8.777  1.00 13.74           C  
ATOM    240  O   ILE A  61      54.183 -79.097   9.065  1.00 14.60           O  
ATOM    241  N   GLN A  62      52.198 -78.096   9.465  1.00 13.97           N  
ATOM    242  CA  GLN A  62      51.862 -78.937  10.623  1.00 15.52           C  
ATOM    243  C   GLN A  62      50.760 -79.951  10.304  1.00 13.94           C  
ATOM    244  O   GLN A  62      50.130 -79.901   9.247  1.00 12.15           O  
ATOM    245  N   LYS A  63      50.570 -80.889  11.233  1.00 11.73           N  
ATOM    246  CA  LYS A  63      49.569 -81.933  11.027  1.00 11.97           C  
ATOM    247  C   LYS A  63      48.202 -81.353  10.662  1.00 10.41           C  
ATOM    248  O   LYS A  63      47.781 -80.321  11.185  1.00  9.59           O  
ATOM    249  N   GLU A  64      47.535 -82.036   9.737  1.00 10.04           N  
ATOM    250  CA  GLU A  64      46.220 -81.637   9.235  1.00 10.94           C  
ATOM    251  C   GLU A  64      46.278 -80.342   8.433  1.00  9.74           C  
ATOM    252  O   GLU A  64      45.259 -79.674   8.256  1.00  9.42           O  
ATOM    253  N   SER A  65      47.441 -80.026   7.885  1.00  6.85           N  
ATOM    254  CA  SER A  65      47.584 -78.857   7.029  1.00  6.90           C  
ATOM    255  C   SER A  65      47.006 -79.194   5.663  1.00  4.72           C  
ATOM    256  O   SER A  65      47.032 -80.349   5.237  1.00  3.91           O  
ATOM    257  N   THR A  66      46.485 -78.177   4.970  1.00  4.48           N  
ATOM    258  CA  THR A  66      45.904 -78.366   3.641  1.00  3.80           C  
ATOM    259  C   THR A  66      46.789 -77.706   2.584  1.00  4.60           C  
ATOM    260  O   THR A  66      47.089 -76.515   2.656  1.00  5.33           O  
ATOM    261  N   LEU A  67      47.167 -78.499   1.586  1.00  4.17           N  
ATOM    262  CA  LEU A  67      47.983 -78.034   0.466  1.00  3.85           C  
ATOM    263  C   LEU A  67      47.064 -77.877  -0.739  1.00  3.80           C  
ATOM    264  O   LEU A  67      46.001 -78.494  -0.813  1.00  5.54           O  
ATOM    265  N   HIS A  68      47.493 -77.046  -1.693  1.00  2.94           N  
ATOM    266  CA  HIS A  68      46.730 -76.804  -2.915  1.00  4.17           C  
ATOM    267  C   HIS A  68      47.534 -77.297  -4.114  1.00  5.32           C  
ATOM    268  O   HIS A  68      48.719 -76.985  -4.248  1.00  7.70           O  
ATOM    269  N   LEU A  69      46.884 -78.069  -4.984  1.00  5.29           N  
ATOM    270  CA  LEU A  69      47.535 -78.613  -6.179  1.00  3.97           C  
ATOM    271  C   LEU A  69      47.060 -77.843  -7.410  1.00  5.07           C  
ATOM    272  O   LEU A  69      45.860 -77.652  -7.604  1.00  4.34           O  
ATOM    273  N   VAL A  70      48.013 -77.414  -8.260  1.00  4.29           N  
ATOM    274  CA  VAL A  70      47.733 -76.683  -9.496  1.00  6.26           C  
ATOM    275  C   VAL A  70      48.315 -77.484 -10.655  1.00  9.22           C  
ATOM    276  O   VAL A  70      49.438 -77.979 -10.593  1.00  9.36           O  
TER
ENDMDL
MODEL      9
ATOM      1  N   GLN A   2      51.516 -87.697   8.473  1.00  9.27           N  
ATOM      2  CA  GLN A   2      50.577 -87.852   7.362  1.00  9.07           C  
ATOM      3  C   GLN A   2      49.916 -86.521   7.030  1.00  8.72           C  
ATOM      4  O   GLN A   2      49.541 -85.752   7.918  1.00  8.22           O  
ATOM      5  N   ILE A   3      49.748 -86.281   5.726  1.00  5.87           N  
ATOM      6  CA  ILE A   3      49.097 -85.072   5.231  1.00  5.07           C  
ATOM      7  C   ILE A   3      48.022 -85.465   4.217  1.00  4.01           C  
ATOM      8  O   ILE A   3      47.979 -86.608   3.759  1.00  4.61           O  
ATOM      9  N   PHE A   4      47.160 -84.505   3.865  1.00  4.55           N  
ATOM     10  CA  PHE A   4      46.087 -84.763   2.892  1.00  4.68           C  
ATOM     11  C   PHE A   4      46.148 -83.780   1.727  1.00  5.30           C  
ATOM     12  O   PHE A   4      46.349 -82.592   1.928  1.00  5.58           O  
ATOM     13  N   VAL A   5      45.922 -84.280   0.506  1.00  4.44           N  
ATOM     14  CA  VAL A   5      45.897 -83.421  -0.687  1.00  3.87           C  
ATOM     15  C   VAL A   5      44.535 -83.570  -1.360  1.00  4.93           C  
ATOM     16  O   VAL A   5      44.135 -84.675  -1.717  1.00  6.84           O  
ATOM     17  N   LYS A   6      43.833 -82.455  -1.559  1.00  6.04           N  
ATOM     18  CA  LYS A   6      42.523 -82.494  -2.223  1.00  6.12           C  
ATOM     19  C   LYS A   6      42.655 -82.089  -3.690  1.00  6.57           C  
ATOM     20  O   LYS A   6      43.430 -81.194  -4.032  1.00  5.76           O  
ATOM     21  N   THR A   7      41.877 -82.756  -4.557  1.00  7.41           N  
ATOM     22  CA  THR A   7      41.895 -82.460  -5.989  1.00  7.48           C  
ATOM     23  C   THR A   7      40.680 -81.625  -6.387  1.00  8.75           C  
ATOM     24  O   THR A   7      39.711 -81.483  -5.641  1.00  8.58           O  
ATOM     25  N   LEU A   8      40.781 -81.089  -7.576  1.00  9.84           N  
ATOM     26  CA  LEU A   8      39.715 -80.252  -8.126  1.00 14.15           C  
ATOM     27  C   LEU A   8      38.427 -81.046  -8.328  1.00 17.37           C  
ATOM     28  O   LEU A   8      37.353 -80.457  -8.456  1.00 17.01           O  
ATOM     29  N   THR A   9      38.524 -82.379  -8.378  1.00 18.33           N  
ATOM     30  CA  THR A   9      37.332 -83.210  -8.593  1.00 19.24           C  
ATOM     31  C   THR A   9      36.713 -83.680  -7.278  1.00 19.48           C  
ATOM     32  O   THR A   9      35.722 -84.410  -7.277  1.00 23.14           O  
ATOM     33  N   GLY A  10      37.270 -83.217  -6.159  1.00 19.43           N  
ATOM     34  CA  GLY A  10      36.725 -83.557  -4.843  1.00 18.74           C  
ATOM     35  C   GLY A  10      37.339 -84.815  -4.233  1.00 17.62           C  
ATOM     36  O   GLY A  10      36.815 -85.368  -3.266  1.00 19.74           O  
ATOM     37  N   LYS A  11      38.456 -85.256  -4.803  1.00 13.56           N  
ATOM     38  CA  LYS A  11      39.123 -86.453  -4.286  1.00 11.91           C  
ATOM     39  C   LYS A  11      40.144 -86.061  -3.221  1.00 10.18           C  
ATOM     40  O   LYS A  11      40.809 -85.039  -3.361  1.00  9.10           O  
ATOM     41  N   THR A  12      40.296 -86.880  -2.174  1.00  9.63           N  
ATOM     42  CA  THR A  12      41.289 -86.582  -1.125  1.00  9.85           C  
ATOM     43  C   THR A  12      42.336 -87.694  -1.105  1.00 11.66           C  
ATOM     44  O   THR A  12      41.990 -88.870  -0.998  1.00 12.33           O  
ATOM     45  N   ILE A  13      43.618 -87.323  -1.182  1.00 10.42           N  
ATOM     46  CA  ILE A  13      44.703 -88.313  -1.143  1.00 11.84           C  
ATOM     47  C   ILE A  13      45.484 -88.173   0.161  1.00 10.55           C  
ATOM     48  O   ILE A  13      45.775 -87.063   0.603  1.00 11.92           O  
ATOM     49  N   THR A  14      45.842 -89.311   0.761  1.00  9.39           N  
ATOM     50  CA  THR A  14      46.615 -89.305   2.003  1.00  9.63           C  
ATOM     51  C   THR A  14      48.059 -89.661   1.676  1.00 11.20           C  
ATOM     52  O   THR A  14      48.313 -90.628   0.959  1.00 11.63           O  
ATOM     53  N   LEU A  15      49.006 -88.872   2.187  1.00  8.29           N  
ATOM     54  CA  LEU A  15      50.428 -89.114   1.919  1.00  9.03           C  
ATOM     55  C   LEU A  15      51.215 -89.189   3.220  1.00  8.59           C  
ATOM     56  O   LEU A  15      50.890 -88.504   4.187  1.00  7.79           O  
ATOM     57  N   GLU A  16      52.294 -89.969   3.217  1.00 11.04           N  
ATOM     58  CA  GLU A  16      53.173 -90.059   4.384  1.00 11.50           C  
ATOM     59  C   GLU A  16      54.396 -89.213   4.061  1.00 10.13           C  
ATOM     60  O   GLU A  16      55.059 -89.436   3.048  1.00  9.83           O  
ATOM     61  N   VAL A  17      54.682 -88.219   4.901  1.00  8.99           N  
ATOM     62  CA  VAL A  17      55.816 -87.327   4.660  1.00  8.85           C  
ATOM     63  C   VAL A  17      56.557 -86.995   5.947  1.00  8.04           C  
ATOM     64  O   VAL A  17      56.061 -87.217   7.052  1.00  8.99           O  
ATOM     65  N   GLU A  18      57.734 -86.403   5.770  1.00  7.29           N  
ATOM     66  CA  GLU A  18      58.562 -85.956   6.890  1.00  7.08           C  
ATOM     67  C   GLU A  18      58.698 -84.434   6.772  1.00  6.45           C  
ATOM     68  O   GLU A  18      58.635 -83.915   5.658  1.00  5.28           O  
ATOM     69  N   PRO A  19      58.860 -83.684   7.843  1.00  7.24           N  
ATOM     70  CA  PRO A  19      58.968 -82.208   7.718  1.00  7.07           C  
ATOM     71  C   PRO A  19      60.128 -81.761   6.828  1.00  6.65           C  
ATOM     72  O   PRO A  19      60.103 -80.661   6.273  1.00  6.37           O  
ATOM     73  N   SER A  20      61.149 -82.608   6.709  1.00  6.80           N  
ATOM     74  CA  SER A  20      62.319 -82.277   5.898  1.00  6.28           C  
ATOM     75  C   SER A  20      62.113 -82.622   4.428  1.00  8.45           C  
ATOM     76  O   SER A  20      62.995 -82.372   3.606  1.00  7.26           O  
ATOM     77  N   ASP A  21      60.950 -83.165   4.078  1.00  7.50           N  
ATOM     78  CA  ASP A  21      60.682 -83.487   2.683  1.00  7.70           C  
ATOM     79  C   ASP A  21      60.488 -82.183   1.929  1.00  7.08           C  
ATOM     80  O   ASP A  21      59.876 -81.229   2.428  1.00  8.11           O  
ATOM     81  N   THR A  22      60.995 -82.178   0.695  1.00  5.37           N  
ATOM     82  CA  THR A  22      60.864 -81.025  -0.178  1.00  6.01           C  
ATOM     83  C   THR A  22      59.541 -81.090  -0.927  1.00  8.01           C  
ATOM     84  O   THR A  22      58.974 -82.162  -1.111  1.00  8.11           O  
ATOM     85  N   ILE A  23      59.079 -79.935  -1.383  1.00  8.32           N  
ATOM     86  CA  ILE A  23      57.840 -79.859  -2.151  1.00  9.92           C  
ATOM     87  C   ILE A  23      57.983 -80.677  -3.439  1.00 10.01           C  
ATOM     88  O   ILE A  23      57.059 -81.388  -3.829  1.00  8.71           O  
ATOM     89  N   GLU A  24      59.152 -80.607  -4.079  1.00  9.54           N  
ATOM     90  CA  GLU A  24      59.392 -81.393  -5.294  1.00 11.81           C  
ATOM     91  C   GLU A  24      59.250 -82.882  -4.968  1.00 11.14           C  
ATOM     92  O   GLU A  24      58.751 -83.658  -5.781  1.00 10.62           O  
ATOM     93  N   ASN A  25      59.694 -83.268  -3.779  1.00  9.43           N  
ATOM     94  CA  ASN A  25      59.601 -84.668  -3.376  1.00 10.96           C  
ATOM     95  C   ASN A  25      58.133 -85.046  -3.195  1.00  9.68           C  
ATOM     96  O   ASN A  25      57.701 -86.111  -3.632  1.00  9.33           O  
ATOM     97  N   VAL A  26      57.366 -84.158  -2.564  1.00  6.52           N  
ATOM     98  CA  VAL A  26      55.945 -84.412  -2.358  1.00  5.53           C  
ATOM     99  C   VAL A  26      55.255 -84.568  -3.712  1.00  4.42           C  
ATOM    100  O   VAL A  26      54.414 -85.455  -3.884  1.00  3.40           O  
ATOM    101  N   LYS A  27      55.619 -83.723  -4.690  1.00  2.64           N  
ATOM    102  CA  LYS A  27      55.030 -83.813  -6.021  1.00  4.14           C  
ATOM    103  C   LYS A  27      55.326 -85.189  -6.609  1.00  5.58           C  
ATOM    104  O   LYS A  27      54.483 -85.790  -7.271  1.00  4.11           O  
ATOM    105  N   ALA A  28      56.548 -85.666  -6.377  1.00  6.61           N  
ATOM    106  CA  ALA A  28      56.963 -86.959  -6.907  1.00  7.74           C  
ATOM    107  C   ALA A  28      56.108 -88.082  -6.330  1.00  9.17           C  
ATOM    108  O   ALA A  28      55.750 -89.022  -7.039  1.00 11.45           O  
ATOM    109  N   LYS A  29      55.765 -87.976  -5.053  1.00  8.96           N  
ATOM    110  CA  LYS A  29      54.930 -88.991  -4.421  1.00  7.90           C  
ATOM    111  C   LYS A  29      53.540 -88.993  -5.059  1.00  6.92           C  
ATOM    112  O   LYS A  29      52.966 -90.049  -5.310  1.00  6.87           O  
ATOM    113  N   ILE A  30      53.022 -87.794  -5.364  1.00  4.57           N  
ATOM    114  CA  ILE A  30      51.717 -87.657  -6.017  1.00  5.58           C  
ATOM    115  C   ILE A  30      51.780 -88.271  -7.420  1.00  7.26           C  
ATOM    116  O   ILE A  30      50.837 -88.929  -7.848  1.00  9.46           O  
ATOM    117  N   GLN A  31      52.886 -88.061  -8.131  1.00  7.06           N  
ATOM    118  CA  GLN A  31      53.034 -88.612  -9.482  1.00  8.67           C  
ATOM    119  C   GLN A  31      52.933 -90.131  -9.421  1.00 10.90           C  
ATOM    120  O   GLN A  31      52.292 -90.764 -10.260  1.00  9.63           O  
ATOM    121  N   ASP A  32      53.602 -90.692  -8.441  1.00 10.93           N  
ATOM    122  CA  ASP A  32      53.615 -92.137  -8.288  1.00 14.01           C  
ATOM    123  C   ASP A  32      52.196 -92.668  -8.084  1.00 14.04           C  
ATOM    124  O   ASP A  32      51.840 -93.730  -8.593  1.00 13.39           O  
ATOM    125  N   LYS A  33      51.408 -91.944  -7.289  1.00 14.22           N  
ATOM    126  CA  LYS A  33      50.046 -92.371  -6.965  1.00 14.00           C  
ATOM    127  C   LYS A  33      48.996 -92.035  -8.041  1.00 12.37           C  
ATOM    128  O   LYS A  33      48.067 -92.816  -8.247  1.00 12.17           O  
ATOM    129  N   GLU A  34      49.071 -90.842  -8.649  1.00 10.11           N  
ATOM    130  CA  GLU A  34      48.027 -90.403  -9.604  1.00 10.07           C  
ATOM    131  C   GLU A  34      48.447 -90.319 -11.081  1.00  9.32           C  
ATOM    132  O   GLU A  34      47.593 -90.257 -11.966  1.00 11.61           O  
ATOM    133  N   GLY A  35      49.748 -90.352 -11.347  1.00  7.22           N  
ATOM    134  CA  GLY A  35      50.239 -90.315 -12.731  1.00  6.29           C  
ATOM    135  C   GLY A  35      50.297 -88.896 -13.313  1.00  6.93           C  
ATOM    136  O   GLY A  35      50.483 -88.715 -14.516  1.00  7.41           O  
ATOM    137  N   ILE A  36      50.135 -87.905 -12.452  1.00  5.86           N  
ATOM    138  CA  ILE A  36      50.168 -86.504 -12.890  1.00  6.07           C  
ATOM    139  C   ILE A  36      51.625 -86.004 -12.912  1.00  6.36           C  
ATOM    140  O   ILE A  36      52.259 -85.959 -11.858  1.00  6.18           O  
ATOM    141  N   PRO A  37      52.188 -85.623 -14.050  1.00  8.65           N  
ATOM    142  CA  PRO A  37      53.601 -85.130 -14.082  1.00  9.18           C  
ATOM    143  C   PRO A  37      53.804 -83.890 -13.174  1.00  9.85           C  
ATOM    144  O   PRO A  37      52.978 -82.978 -13.188  1.00  8.51           O  
ATOM    145  N   PRO A  38      54.871 -83.838 -12.380  1.00  8.71           N  
ATOM    146  CA  PRO A  38      55.137 -82.681 -11.458  1.00  9.08           C  
ATOM    147  C   PRO A  38      55.043 -81.300 -12.125  1.00  9.28           C  
ATOM    148  O   PRO A  38      54.691 -80.327 -11.459  1.00  6.50           O  
ATOM    149  N   ASP A  39      55.374 -81.189 -13.402  1.00 11.20           N  
ATOM    150  CA  ASP A  39      55.329 -79.883 -14.060  1.00 14.96           C  
ATOM    151  C   ASP A  39      53.896 -79.404 -14.276  1.00 13.99           C  
ATOM    152  O   ASP A  39      53.668 -78.225 -14.548  1.00 13.75           O  
ATOM    153  N   GLN A  40      52.929 -80.316 -14.167  1.00 11.60           N  
ATOM    154  CA  GLN A  40      51.520 -79.956 -14.367  1.00 10.76           C  
ATOM    155  C   GLN A  40      50.800 -79.752 -13.035  1.00  8.01           C  
ATOM    156  O   GLN A  40      49.597 -79.490 -13.007  1.00  8.96           O  
ATOM    157  N   GLN A  41      51.530 -79.907 -11.933  1.00  6.52           N  
ATOM    158  CA  GLN A  41      50.938 -79.774 -10.596  1.00  3.87           C  
ATOM    159  C   GLN A  41      51.310 -78.467  -9.897  1.00  4.79           C  
ATOM    160  O   GLN A  41      52.463 -78.038  -9.922  1.00  6.34           O  
ATOM    161  N   ARG A  42      50.324 -77.883  -9.210  1.00  5.73           N  
ATOM    162  CA  ARG A  42      50.536 -76.670  -8.421  1.00  6.97           C  
ATOM    163  C   ARG A  42      49.987 -76.916  -7.017  1.00  7.15           C  
ATOM    164  O   ARG A  42      48.812 -77.230  -6.857  1.00  7.33           O  
ATOM    165  N   LEU A  43      50.841 -76.803  -5.998  1.00  4.65           N  
ATOM    166  CA  LEU A  43      50.432 -77.047  -4.607  1.00  3.51           C  
ATOM    167  C   LEU A  43      50.243 -75.738  -3.851  1.00  5.56           C  
ATOM    168  O   LEU A  43      51.099 -74.851  -3.879  1.00  4.19           O  
ATOM    169  N   ILE A  44      49.090 -75.630  -3.190  1.00  4.58           N  
ATOM    170  CA  ILE A  44      48.737 -74.431  -2.432  1.00  5.55           C  
ATOM    171  C   ILE A  44      48.315 -74.783  -1.009  1.00  5.46           C  
ATOM    172  O   ILE A  44      47.602 -75.763  -0.782  1.00  6.04           O  
ATOM    173  N   PHE A  45      48.753 -73.958  -0.058  1.00  6.75           N  
ATOM    174  CA  PHE A  45      48.413 -74.158   1.352  1.00  4.70           C  
ATOM    175  C   PHE A  45      48.130 -72.818   2.013  1.00  6.34           C  
ATOM    176  O   PHE A  45      48.909 -71.888   1.884  1.00  5.45           O  
ATOM    177  N   ALA A  46      47.018 -72.729   2.725  1.00  6.53           N  
ATOM    178  CA  ALA A  46      46.649 -71.497   3.414  1.00  7.15           C  
ATOM    179  C   ALA A  46      46.720 -70.278   2.490  1.00  9.00           C  
ATOM    180  O   ALA A  46      47.028 -69.170   2.931  1.00 11.15           O  
ATOM    181  N   GLY A  47      46.363 -70.480   1.224  1.00  9.35           N  
ATOM    182  CA  GLY A  47      46.316 -69.373   0.265  1.00 11.68           C  
ATOM    183  C   GLY A  47      47.660 -69.010  -0.377  1.00 11.14           C  
ATOM    184  O   GLY A  47      47.701 -68.095  -1.200  1.00 13.93           O  
ATOM    185  N   LYS A  48      48.759 -69.695  -0.026  1.00 10.47           N  
ATOM    186  CA  LYS A  48      50.073 -69.376  -0.619  1.00  8.82           C  
ATOM    187  C   LYS A  48      50.565 -70.515  -1.512  1.00  7.68           C  
ATOM    188  O   LYS A  48      50.418 -71.693  -1.173  1.00  6.47           O  
ATOM    189  N   GLN A  49      51.161 -70.153  -2.646  1.00  8.89           N  
ATOM    190  CA  GLN A  49      51.688 -71.150  -3.574  1.00  7.18           C  
ATOM    191  C   GLN A  49      53.017 -71.665  -3.028  1.00  8.23           C  
ATOM    192  O   GLN A  49      53.905 -70.876  -2.705  1.00  9.70           O  
ATOM    193  N   LEU A  50      53.152 -72.985  -2.912  1.00  6.51           N  
ATOM    194  CA  LEU A  50      54.387 -73.568  -2.385  1.00  7.41           C  
ATOM    195  C   LEU A  50      55.421 -73.763  -3.494  1.00  8.27           C  
ATOM    196  O   LEU A  50      55.094 -74.214  -4.591  1.00  8.34           O  
ATOM    197  N   GLU A  51      56.677 -73.403  -3.197  1.00  9.43           N  
ATOM    198  CA  GLU A  51      57.756 -73.529  -4.187  1.00 11.90           C  
ATOM    199  C   GLU A  51      58.458 -74.885  -4.096  1.00 11.49           C  
ATOM    200  O   GLU A  51      58.503 -75.512  -3.037  1.00  9.88           O  
ATOM    201  N   ASP A  52      58.960 -75.344  -5.245  1.00 12.71           N  
ATOM    202  CA  ASP A  52      59.613 -76.651  -5.322  1.00 16.56           C  
ATOM    203  C   ASP A  52      60.950 -76.701  -4.564  1.00 15.83           C  
ATOM    204  O   ASP A  52      61.432 -77.785  -4.237  1.00 17.21           O  
ATOM    205  N   GLY A  53      61.556 -75.547  -4.298  1.00 15.00           N  
ATOM    206  CA  GLY A  53      62.849 -75.508  -3.590  1.00 11.77           C  
ATOM    207  C   GLY A  53      62.700 -75.350  -2.068  1.00 11.10           C  
ATOM    208  O   GLY A  53      63.703 -75.248  -1.361  1.00 11.25           O  
ATOM    209  N   ARG A  54      61.472 -75.346  -1.561  1.00  8.53           N  
ATOM    210  CA  ARG A  54      61.250 -75.215  -0.103  1.00  9.05           C  
ATOM    211  C   ARG A  54      60.748 -76.540   0.504  1.00  8.96           C  
ATOM    212  O   ARG A  54      60.325 -77.444  -0.221  1.00 11.60           O  
ATOM    213  N   THR A  55      60.802 -76.646   1.850  1.00  9.05           N  
ATOM    214  CA  THR A  55      60.349 -77.864   2.557  1.00  9.03           C  
ATOM    215  C   THR A  55      59.019 -77.639   3.275  1.00  8.15           C  
ATOM    216  O   THR A  55      58.570 -76.509   3.459  1.00  5.91           O  
ATOM    217  N   LEU A  56      58.417 -78.753   3.710  1.00  6.91           N  
ATOM    218  CA  LEU A  56      57.155 -78.694   4.456  1.00  8.29           C  
ATOM    219  C   LEU A  56      57.332 -77.884   5.740  1.00  8.05           C  
ATOM    220  O   LEU A  56      56.476 -77.068   6.082  1.00 10.17           O  
ATOM    221  N   SER A  57      58.434 -78.123   6.471  1.00  8.92           N  
ATOM    222  CA  SER A  57      58.649 -77.402   7.724  1.00  9.00           C  
ATOM    223  C   SER A  57      58.767 -75.899   7.500  1.00  9.44           C  
ATOM    224  O   SER A  57      58.411 -75.106   8.372  1.00 10.91           O  
ATOM    225  N   ASP A  58      59.270 -75.508   6.343  1.00  9.11           N  
ATOM    226  CA  ASP A  58      59.428 -74.089   6.050  1.00  7.91           C  
ATOM    227  C   ASP A  58      58.068 -73.402   6.024  1.00  9.12           C  
ATOM    228  O   ASP A  58      57.961 -72.206   6.295  1.00  8.61           O  
ATOM    229  N   TYR A  59      57.025 -74.165   5.690  1.00  7.97           N  
ATOM    230  CA  TYR A  59      55.667 -73.618   5.626  1.00  8.45           C  
ATOM    231  C   TYR A  59      54.870 -73.952   6.887  1.00 10.98           C  
ATOM    232  O   TYR A  59      53.648 -73.808   6.909  1.00 12.95           O  
ATOM    233  N   ASN A  60      55.568 -74.394   7.936  1.00 12.38           N  
ATOM    234  CA  ASN A  60      54.946 -74.743   9.212  1.00 13.94           C  
ATOM    235  C   ASN A  60      53.752 -75.678   9.034  1.00 14.16           C  
ATOM    236  O   ASN A  60      52.750 -75.554   9.737  1.00 14.26           O  
ATOM    237  N   ILE A  61      53.873 -76.629   8.115  1.00 11.08           N  
ATOM    238  CA  ILE A  61      52.799 -77.595   7.888  1.00 11.78           C  
ATOM    239  C   ILE A  61      52.915 -78.688   8.949  1.00 13.74           C  
ATOM    240  O   ILE A  61      53.975 -79.292   9.114  1.00 14.60           O  
ATOM    241  N   GLN A  62      51.829 -78.907   9.707  1.00 13.97           N  
ATOM    242  CA  GLN A  62      51.816 -79.888  10.801  1.00 15.52           C  
ATOM    243  C   GLN A  62      50.998 -81.133  10.448  1.00 13.94           C  
ATOM    244  O   GLN A  62      50.300 -81.176   9.435  1.00 12.15           O  
ATOM    245  N   LYS A  63      51.130 -82.153  11.295  1.00 11.73           N  
ATOM    246  CA  LYS A  63      50.423 -83.406  11.041  1.00 11.97           C  
ATOM    247  C   LYS A  63      48.934 -83.171  10.788  1.00 10.41           C  
ATOM    248  O   LYS A  63      48.307 -82.311  11.407  1.00  9.59           O  
ATOM    249  N   GLU A  64      48.395 -83.944   9.848  1.00 10.04           N  
ATOM    250  CA  GLU A  64      46.990 -83.853   9.449  1.00 10.94           C  
ATOM    251  C   GLU A  64      46.658 -82.537   8.758  1.00  9.74           C  
ATOM    252  O   GLU A  64      45.491 -82.152   8.689  1.00  9.42           O  
ATOM    253  N   SER A  65      47.656 -81.885   8.179  1.00  6.85           N  
ATOM    254  CA  SER A  65      47.425 -80.664   7.421  1.00  6.90           C  
ATOM    255  C   SER A  65      46.873 -81.053   6.057  1.00  4.72           C  
ATOM    256  O   SER A  65      47.197 -82.117   5.529  1.00  3.91           O  
ATOM    257  N   THR A  66      46.037 -80.183   5.482  1.00  4.48           N  
ATOM    258  CA  THR A  66      45.445 -80.440   4.169  1.00  3.80           C  
ATOM    259  C   THR A  66      46.030 -79.478   3.136  1.00  4.60           C  
ATOM    260  O   THR A  66      45.983 -78.259   3.299  1.00  5.33           O  
ATOM    261  N   LEU A  67      46.541 -80.055   2.053  1.00  4.17           N  
ATOM    262  CA  LEU A  67      47.102 -79.295   0.939  1.00  3.85           C  
ATOM    263  C   LEU A  67      46.086 -79.316  -0.194  1.00  3.80           C  
ATOM    264  O   LEU A  67      45.239 -80.205  -0.274  1.00  5.54           O  
ATOM    265  N   HIS A  68      46.187 -78.325  -1.083  1.00  2.94           N  
ATOM    266  CA  HIS A  68      45.297 -78.219  -2.233  1.00  4.17           C  
ATOM    267  C   HIS A  68      46.117 -78.392  -3.503  1.00  5.32           C  
ATOM    268  O   HIS A  68      47.158 -77.754  -3.669  1.00  7.70           O  
ATOM    269  N   LEU A  69      45.650 -79.254  -4.402  1.00  5.29           N  
ATOM    270  CA  LEU A  69      46.351 -79.505  -5.661  1.00  3.97           C  
ATOM    271  C   LEU A  69      45.593 -78.818  -6.789  1.00  5.07           C  
ATOM    272  O   LEU A  69      44.376 -78.966  -6.907  1.00  4.34           O  
ATOM    273  N   VAL A  70      46.321 -78.072  -7.636  1.00  4.29           N  
ATOM    274  CA  VAL A  70      45.758 -77.361  -8.778  1.00  6.26           C  
ATOM    275  C   VAL A  70      46.441 -77.877 -10.034  1.00  9.22           C  
ATOM    276  O   VAL A  70      47.606 -78.272 -10.015  1.00  9.36           O  
TER
ENDMDL
MODEL      10
ATOM      1  N   GLN A   2      50.160 -87.096   8.691  1.00  9.27           N  
ATOM      2  CA  GLN A   2      49.270 -87.155   7.530  1.00  9.07           C  
ATOM      3  C   GLN A   2      48.831 -85.753   7.129  1.00  8.72           C  
ATOM      4  O   GLN A   2      48.552 -84.901   7.977  1.00  8.22           O  
ATOM      5  N   ILE A   3      48.748 -85.537   5.813  1.00  5.87           N  
ATOM      6  CA  ILE A   3      48.313 -84.258   5.258  1.00  5.07           C  
ATOM      7  C   ILE A   3      47.222 -84.500   4.217  1.00  4.01           C  
ATOM      8  O   ILE A   3      46.997 -85.637   3.792  1.00  4.61           O  
ATOM      9  N   PHE A   4      46.552 -83.421   3.805  1.00  4.55           N  
ATOM     10  CA  PHE A   4      45.482 -83.520   2.804  1.00  4.68           C  
ATOM     11  C   PHE A   4      45.756 -82.599   1.621  1.00  5.30           C  
ATOM     12  O   PHE A   4      46.156 -81.460   1.802  1.00  5.58           O  
ATOM     13  N   VAL A   5      45.498 -83.091   0.405  1.00  4.44           N  
ATOM     14  CA  VAL A   5      45.677 -82.275  -0.806  1.00  3.87           C  
ATOM     15  C   VAL A   5      44.340 -82.174  -1.534  1.00  4.93           C  
ATOM     16  O   VAL A   5      43.744 -83.187  -1.887  1.00  6.84           O  
ATOM     17  N   LYS A   6      43.882 -80.948  -1.789  1.00  6.04           N  
ATOM     18  CA  LYS A   6      42.622 -80.743  -2.511  1.00  6.12           C  
ATOM     19  C   LYS A   6      42.910 -80.396  -3.972  1.00  6.57           C  
ATOM     20  O   LYS A   6      43.815 -79.621  -4.266  1.00  5.76           O  
ATOM     21  N   THR A   7      42.120 -80.966  -4.882  1.00  7.41           N  
ATOM     22  CA  THR A   7      42.289 -80.698  -6.311  1.00  7.48           C  
ATOM     23  C   THR A   7      41.284 -79.652  -6.779  1.00  8.75           C  
ATOM     24  O   THR A   7      40.283 -79.383  -6.115  1.00  8.58           O  
ATOM     25  N   LEU A   8      41.573 -79.080  -7.926  1.00  9.84           N  
ATOM     26  CA  LEU A   8      40.697 -78.063  -8.491  1.00 14.15           C  
ATOM     27  C   LEU A   8      39.339 -78.657  -8.843  1.00 17.37           C  
ATOM     28  O   LEU A   8      38.392 -77.922  -9.120  1.00 17.01           O  
ATOM     29  N   THR A   9      39.236 -79.992  -8.824  1.00 18.33           N  
ATOM     30  CA  THR A   9      37.964 -80.656  -9.138  1.00 19.24           C  
ATOM     31  C   THR A   9      37.201 -81.001  -7.862  1.00 19.48           C  
ATOM     32  O   THR A   9      36.090 -81.530  -7.914  1.00 23.14           O  
ATOM     33  N   GLY A  10      37.780 -80.640  -6.718  1.00 19.43           N  
ATOM     34  CA  GLY A  10      37.125 -80.850  -5.427  1.00 18.74           C  
ATOM     35  C   GLY A  10      37.457 -82.185  -4.766  1.00 17.62           C  
ATOM     36  O   GLY A  10      36.814 -82.584  -3.795  1.00 19.74           O  
ATOM     37  N   LYS A  11      38.464 -82.873  -5.300  1.00 13.56           N  
ATOM     38  CA  LYS A  11      38.852 -84.167  -4.732  1.00 11.91           C  
ATOM     39  C   LYS A  11      39.888 -83.957  -3.636  1.00 10.18           C  
ATOM     40  O   LYS A  11      40.760 -83.108  -3.780  1.00  9.10           O  
ATOM     41  N   THR A  12      39.813 -84.740  -2.552  1.00  9.63           N  
ATOM     42  CA  THR A  12      40.799 -84.604  -1.465  1.00  9.85           C  
ATOM     43  C   THR A  12      41.629 -85.877  -1.365  1.00 11.66           C  
ATOM     44  O   THR A  12      41.083 -86.974  -1.238  1.00 12.33           O  
ATOM     45  N   ILE A  13      42.954 -85.725  -1.395  1.00 10.42           N  
ATOM     46  CA  ILE A  13      43.860 -86.868  -1.276  1.00 11.84           C  
ATOM     47  C   ILE A  13      44.589 -86.806   0.059  1.00 10.55           C  
ATOM     48  O   ILE A  13      45.049 -85.745   0.477  1.00 11.92           O  
ATOM     49  N   THR A  14      44.715 -87.960   0.711  1.00  9.39           N  
ATOM     50  CA  THR A  14      45.422 -88.032   1.988  1.00  9.63           C  
ATOM     51  C   THR A  14      46.784 -88.658   1.747  1.00 11.20           C  
ATOM     52  O   THR A  14      46.878 -89.717   1.126  1.00 11.63           O  
ATOM     53  N   LEU A  15      47.843 -88.017   2.246  1.00  8.29           N  
ATOM     54  CA  LEU A  15      49.205 -88.537   2.071  1.00  9.03           C  
ATOM     55  C   LEU A  15      49.859 -88.746   3.432  1.00  8.59           C  
ATOM     56  O   LEU A  15      49.624 -87.982   4.368  1.00  7.79           O  
ATOM     57  N   GLU A  16      50.756 -89.727   3.503  1.00 11.04           N  
ATOM     58  CA  GLU A  16      51.528 -89.961   4.718  1.00 11.50           C  
ATOM     59  C   GLU A  16      52.902 -89.375   4.429  1.00 10.13           C  
ATOM     60  O   GLU A  16      53.550 -89.759   3.455  1.00  9.83           O  
ATOM     61  N   VAL A  17      53.334 -88.418   5.244  1.00  8.99           N  
ATOM     62  CA  VAL A  17      54.624 -87.762   5.023  1.00  8.85           C  
ATOM     63  C   VAL A  17      55.359 -87.517   6.334  1.00  8.04           C  
ATOM     64  O   VAL A  17      54.789 -87.623   7.420  1.00  8.99           O  
ATOM     65  N   GLU A  18      56.624 -87.127   6.201  1.00  7.29           N  
ATOM     66  CA  GLU A  18      57.461 -86.786   7.351  1.00  7.08           C  
ATOM     67  C   GLU A  18      57.855 -85.309   7.208  1.00  6.45           C  
ATOM     68  O   GLU A  18      57.956 -84.827   6.080  1.00  5.28           O  
ATOM     69  N   PRO A  19      58.064 -84.558   8.271  1.00  7.24           N  
ATOM     70  CA  PRO A  19      58.424 -83.125   8.120  1.00  7.07           C  
ATOM     71  C   PRO A  19      59.684 -82.906   7.286  1.00  6.65           C  
ATOM     72  O   PRO A  19      59.874 -81.835   6.707  1.00  6.37           O  
ATOM     73  N   SER A  20      60.553 -83.915   7.243  1.00  6.80           N  
ATOM     74  CA  SER A  20      61.803 -83.809   6.495  1.00  6.28           C  
ATOM     75  C   SER A  20      61.616 -84.177   5.028  1.00  8.45           C  
ATOM     76  O   SER A  20      62.563 -84.099   4.246  1.00  7.26           O  
ATOM     77  N   ASP A  21      60.400 -84.551   4.638  1.00  7.50           N  
ATOM     78  CA  ASP A  21      60.148 -84.885   3.244  1.00  7.70           C  
ATOM     79  C   ASP A  21      60.205 -83.600   2.443  1.00  7.08           C  
ATOM     80  O   ASP A  21      59.755 -82.534   2.886  1.00  8.11           O  
ATOM     81  N   THR A  22      60.743 -83.735   1.232  1.00  5.37           N  
ATOM     82  CA  THR A  22      60.845 -82.617   0.318  1.00  6.01           C  
ATOM     83  C   THR A  22      59.559 -82.484  -0.484  1.00  8.01           C  
ATOM     84  O   THR A  22      58.820 -83.446  -0.659  1.00  8.11           O  
ATOM     85  N   ILE A  23      59.320 -81.291  -0.989  1.00  8.32           N  
ATOM     86  CA  ILE A  23      58.143 -81.032  -1.808  1.00  9.92           C  
ATOM     87  C   ILE A  23      58.197 -81.901  -3.063  1.00 10.01           C  
ATOM     88  O   ILE A  23      57.179 -82.439  -3.490  1.00  8.71           O  
ATOM     89  N   GLU A  24      59.390 -82.065  -3.634  1.00  9.54           N  
ATOM     90  CA  GLU A  24      59.540 -82.912  -4.818  1.00 11.81           C  
ATOM     91  C   GLU A  24      59.097 -84.325  -4.462  1.00 11.14           C  
ATOM     92  O   GLU A  24      58.476 -85.011  -5.268  1.00 10.62           O  
ATOM     93  N   ASN A  25      59.415 -84.748  -3.246  1.00  9.43           N  
ATOM     94  CA  ASN A  25      59.021 -86.084  -2.807  1.00 10.96           C  
ATOM     95  C   ASN A  25      57.497 -86.154  -2.708  1.00  9.68           C  
ATOM     96  O   ASN A  25      56.889 -87.136  -3.125  1.00  9.33           O  
ATOM     97  N   VAL A  26      56.884 -85.101  -2.165  1.00  6.52           N  
ATOM     98  CA  VAL A  26      55.428 -85.060  -2.037  1.00  5.53           C  
ATOM     99  C   VAL A  26      54.783 -85.136  -3.421  1.00  4.42           C  
ATOM    100  O   VAL A  26      53.824 -85.886  -3.620  1.00  3.40           O  
ATOM    101  N   LYS A  27      55.315 -84.376  -4.392  1.00  2.64           N  
ATOM    102  CA  LYS A  27      54.779 -84.395  -5.748  1.00  4.14           C  
ATOM    103  C   LYS A  27      54.883 -85.811  -6.308  1.00  5.58           C  
ATOM    104  O   LYS A  27      53.986 -86.285  -7.000  1.00  4.11           O  
ATOM    105  N   ALA A  28      56.001 -86.468  -6.011  1.00  6.61           N  
ATOM    106  CA  ALA A  28      56.231 -87.819  -6.501  1.00  7.74           C  
ATOM    107  C   ALA A  28      55.181 -88.776  -5.949  1.00  9.17           C  
ATOM    108  O   ALA A  28      54.710 -89.665  -6.656  1.00 11.45           O  
ATOM    109  N   LYS A  29      54.799 -88.576  -4.697  1.00  8.96           N  
ATOM    110  CA  LYS A  29      53.780 -89.418  -4.086  1.00  7.90           C  
ATOM    111  C   LYS A  29      52.442 -89.213  -4.797  1.00  6.92           C  
ATOM    112  O   LYS A  29      51.715 -90.169  -5.051  1.00  6.87           O  
ATOM    113  N   ILE A  30      52.148 -87.957  -5.164  1.00  4.57           N  
ATOM    114  CA  ILE A  30      50.918 -87.640  -5.894  1.00  5.58           C  
ATOM    115  C   ILE A  30      50.951 -88.298  -7.281  1.00  7.26           C  
ATOM    116  O   ILE A  30      49.938 -88.815  -7.742  1.00  9.46           O  
ATOM    117  N   GLN A  31      52.111 -88.288  -7.939  1.00  7.06           N  
ATOM    118  CA  GLN A  31      52.239 -88.906  -9.266  1.00  8.67           C  
ATOM    119  C   GLN A  31      51.903 -90.390  -9.175  1.00 10.90           C  
ATOM    120  O   GLN A  31      51.204 -90.942 -10.024  1.00  9.63           O  
ATOM    121  N   ASP A  32      52.438 -91.020  -8.152  1.00 10.93           N  
ATOM    122  CA  ASP A  32      52.224 -92.448  -7.966  1.00 14.01           C  
ATOM    123  C   ASP A  32      50.739 -92.761  -7.793  1.00 14.04           C  
ATOM    124  O   ASP A  32      50.249 -93.775  -8.288  1.00 13.39           O  
ATOM    125  N   LYS A  33      50.042 -91.910  -7.047  1.00 14.22           N  
ATOM    126  CA  LYS A  33      48.623 -92.127  -6.761  1.00 14.00           C  
ATOM    127  C   LYS A  33      47.680 -91.668  -7.886  1.00 12.37           C  
ATOM    128  O   LYS A  33      46.650 -92.304  -8.114  1.00 12.17           O  
ATOM    129  N   GLU A  34      47.967 -90.526  -8.519  1.00 10.11           N  
ATOM    130  CA  GLU A  34      47.050 -89.963  -9.533  1.00 10.07           C  
ATOM    131  C   GLU A  34      47.559 -89.970 -10.982  1.00  9.32           C  
ATOM    132  O   GLU A  34      46.773 -89.806 -11.915  1.00 11.61           O  
ATOM    133  N   GLY A  35      48.854 -90.195 -11.174  1.00  7.22           N  
ATOM    134  CA  GLY A  35      49.414 -90.261 -12.529  1.00  6.29           C  
ATOM    135  C   GLY A  35      49.717 -88.883 -13.133  1.00  6.93           C  
ATOM    136  O   GLY A  35      49.990 -88.764 -14.328  1.00  7.41           O  
ATOM    137  N   ILE A  36      49.663 -87.853 -12.299  1.00  5.86           N  
ATOM    138  CA  ILE A  36      49.930 -86.485 -12.758  1.00  6.07           C  
ATOM    139  C   ILE A  36      51.444 -86.204 -12.704  1.00  6.36           C  
ATOM    140  O   ILE A  36      52.019 -86.219 -11.615  1.00  6.18           O  
ATOM    141  N   PRO A  37      52.120 -85.942 -13.813  1.00  8.65           N  
ATOM    142  CA  PRO A  37      53.590 -85.662 -13.773  1.00  9.18           C  
ATOM    143  C   PRO A  37      53.930 -84.436 -12.887  1.00  9.85           C  
ATOM    144  O   PRO A  37      53.265 -83.405 -12.985  1.00  8.51           O  
ATOM    145  N   PRO A  38      54.942 -84.524 -12.026  1.00  8.71           N  
ATOM    146  CA  PRO A  38      55.343 -83.388 -11.124  1.00  9.08           C  
ATOM    147  C   PRO A  38      55.510 -82.036 -11.836  1.00  9.28           C  
ATOM    148  O   PRO A  38      55.320 -80.991 -11.213  1.00  6.50           O  
ATOM    149  N   ASP A  39      55.896 -82.035 -13.101  1.00 11.20           N  
ATOM    150  CA  ASP A  39      56.111 -80.767 -13.802  1.00 14.96           C  
ATOM    151  C   ASP A  39      54.791 -80.060 -14.109  1.00 13.99           C  
ATOM    152  O   ASP A  39      54.780 -78.871 -14.427  1.00 13.75           O  
ATOM    153  N   GLN A  40      53.678 -80.794 -14.024  1.00 11.60           N  
ATOM    154  CA  GLN A  40      52.357 -80.216 -14.309  1.00 10.76           C  
ATOM    155  C   GLN A  40      51.610 -79.853 -13.028  1.00  8.01           C  
ATOM    156  O   GLN A  40      50.465 -79.404 -13.077  1.00  8.96           O  
ATOM    157  N   GLN A  41      52.244 -80.081 -11.886  1.00  6.52           N  
ATOM    158  CA  GLN A  41      51.605 -79.807 -10.593  1.00  3.87           C  
ATOM    159  C   GLN A  41      52.163 -78.578  -9.876  1.00  4.79           C  
ATOM    160  O   GLN A  41      53.374 -78.365  -9.813  1.00  6.34           O  
ATOM    161  N   ARG A  42      51.243 -77.814  -9.277  1.00  5.73           N  
ATOM    162  CA  ARG A  42      51.586 -76.636  -8.479  1.00  6.97           C  
ATOM    163  C   ARG A  42      50.938 -76.789  -7.102  1.00  7.15           C  
ATOM    164  O   ARG A  42      49.722 -76.936  -7.002  1.00  7.33           O  
ATOM    165  N   LEU A  43      51.745 -76.767  -6.041  1.00  4.65           N  
ATOM    166  CA  LEU A  43      51.236 -76.917  -4.672  1.00  3.51           C  
ATOM    167  C   LEU A  43      51.248 -75.578  -3.943  1.00  5.56           C  
ATOM    168  O   LEU A  43      52.252 -74.866  -3.936  1.00  4.19           O  
ATOM    169  N   ILE A  44      50.110 -75.247  -3.331  1.00  4.58           N  
ATOM    170  CA  ILE A  44      49.959 -73.990  -2.593  1.00  5.55           C  
ATOM    171  C   ILE A  44      49.534 -74.260  -1.149  1.00  5.46           C  
ATOM    172  O   ILE A  44      48.658 -75.088  -0.886  1.00  6.04           O  
ATOM    173  N   PHE A  45      50.141 -73.514  -0.227  1.00  6.75           N  
ATOM    174  CA  PHE A  45      49.812 -73.618   1.192  1.00  4.70           C  
ATOM    175  C   PHE A  45      49.736 -72.220   1.788  1.00  6.34           C  
ATOM    176  O   PHE A  45      50.674 -71.431   1.670  1.00  5.45           O  
ATOM    177  N   ALA A  46      48.617 -71.922   2.428  1.00  6.53           N  
ATOM    178  CA  ALA A  46      48.414 -70.622   3.046  1.00  7.15           C  
ATOM    179  C   ALA A  46      48.746 -69.483   2.083  1.00  9.00           C  
ATOM    180  O   ALA A  46      49.261 -68.442   2.490  1.00 11.15           O  
ATOM    181  N   GLY A  47      48.389 -69.668   0.809  1.00  9.35           N  
ATOM    182  CA  GLY A  47      48.593 -68.623  -0.197  1.00 11.68           C  
ATOM    183  C   GLY A  47      49.996 -68.595  -0.814  1.00 11.14           C  
ATOM    184  O   GLY A  47      50.270 -67.741  -1.658  1.00 13.93           O  
ATOM    185  N   LYS A  48      50.897 -69.496  -0.401  1.00 10.47           N  
ATOM    186  CA  LYS A  48      52.269 -69.505  -0.942  1.00  8.82           C  
ATOM    187  C   LYS A  48      52.539 -70.749  -1.792  1.00  7.68           C  
ATOM    188  O   LYS A  48      52.165 -71.859  -1.419  1.00  6.47           O  
ATOM    189  N   GLN A  49      53.228 -70.553  -2.919  1.00  8.89           N  
ATOM    190  CA  GLN A  49      53.584 -71.671  -3.794  1.00  7.18           C  
ATOM    191  C   GLN A  49      54.800 -72.364  -3.183  1.00  8.23           C  
ATOM    192  O   GLN A  49      55.784 -71.709  -2.838  1.00  9.70           O  
ATOM    193  N   LEU A  50      54.727 -73.684  -3.032  1.00  6.51           N  
ATOM    194  CA  LEU A  50      55.829 -74.441  -2.437  1.00  7.41           C  
ATOM    195  C   LEU A  50      56.867 -74.848  -3.487  1.00  8.27           C  
ATOM    196  O   LEU A  50      56.517 -75.271  -4.589  1.00  8.34           O  
ATOM    197  N   GLU A  51      58.153 -74.702  -3.135  1.00  9.43           N  
ATOM    198  CA  GLU A  51      59.243 -75.045  -4.064  1.00 11.90           C  
ATOM    199  C   GLU A  51      59.711 -76.493  -3.894  1.00 11.49           C  
ATOM    200  O   GLU A  51      59.645 -77.056  -2.805  1.00  9.88           O  
ATOM    201  N   ASP A  52      60.161 -77.084  -5.010  1.00 12.71           N  
ATOM    202  CA  ASP A  52      60.614 -78.481  -5.021  1.00 16.56           C  
ATOM    203  C   ASP A  52      61.891 -78.726  -4.197  1.00 15.83           C  
ATOM    204  O   ASP A  52      62.153 -79.860  -3.797  1.00 17.21           O  
ATOM    205  N   GLY A  53      62.694 -77.692  -3.957  1.00 15.00           N  
ATOM    206  CA  GLY A  53      63.947 -77.860  -3.195  1.00 11.77           C  
ATOM    207  C   GLY A  53      63.780 -77.618  -1.686  1.00 11.10           C  
ATOM    208  O   GLY A  53      64.761 -77.680  -0.944  1.00 11.25           O  
ATOM    209  N   ARG A  54      62.563 -77.355  -1.231  1.00  8.53           N  
ATOM    210  CA  ARG A  54      62.322 -77.120   0.211  1.00  9.05           C  
ATOM    211  C   ARG A  54      61.534 -78.279   0.848  1.00  8.96           C  
ATOM    212  O   ARG A  54      60.952 -79.103   0.143  1.00 11.60           O  
ATOM    213  N   THR A  55      61.517 -78.328   2.200  1.00  9.05           N  
ATOM    214  CA  THR A  55      60.787 -79.383   2.934  1.00  9.03           C  
ATOM    215  C   THR A  55      59.516 -78.845   3.590  1.00  8.15           C  
ATOM    216  O   THR A  55      59.318 -77.638   3.715  1.00  5.91           O  
ATOM    217  N   LEU A  56      58.674 -79.782   4.034  1.00  6.91           N  
ATOM    218  CA  LEU A  56      57.426 -79.421   4.718  1.00  8.29           C  
ATOM    219  C   LEU A  56      57.713 -78.611   5.982  1.00  8.05           C  
ATOM    220  O   LEU A  56      57.013 -77.638   6.264  1.00 10.17           O  
ATOM    221  N   SER A  57      58.722 -79.017   6.767  1.00  8.92           N  
ATOM    222  CA  SER A  57      59.016 -78.295   8.005  1.00  9.00           C  
ATOM    223  C   SER A  57      59.407 -76.843   7.740  1.00  9.44           C  
ATOM    224  O   SER A  57      59.162 -75.967   8.569  1.00 10.91           O  
ATOM    225  N   ASP A  58      60.015 -76.593   6.595  1.00  9.11           N  
ATOM    226  CA  ASP A  58      60.431 -75.238   6.254  1.00  7.91           C  
ATOM    227  C   ASP A  58      59.216 -74.318   6.159  1.00  9.12           C  
ATOM    228  O   ASP A  58      59.315 -73.116   6.407  1.00  8.61           O  
ATOM    229  N   TYR A  59      58.066 -74.891   5.796  1.00  7.97           N  
ATOM    230  CA  TYR A  59      56.827 -74.116   5.667  1.00  8.45           C  
ATOM    231  C   TYR A  59      55.934 -74.272   6.897  1.00 10.98           C  
ATOM    232  O   TYR A  59      54.758 -73.909   6.867  1.00 12.95           O  
ATOM    233  N   ASN A  60      56.497 -74.807   7.983  1.00 12.38           N  
ATOM    234  CA  ASN A  60      55.771 -75.010   9.232  1.00 13.94           C  
ATOM    235  C   ASN A  60      54.440 -75.725   9.014  1.00 14.16           C  
ATOM    236  O   ASN A  60      53.443 -75.403   9.662  1.00 14.26           O  
ATOM    237  N   ILE A  61      54.431 -76.714   8.125  1.00 11.08           N  
ATOM    238  CA  ILE A  61      53.211 -77.480   7.872  1.00 11.78           C  
ATOM    239  C   ILE A  61      53.084 -78.540   8.964  1.00 13.74           C  
ATOM    240  O   ILE A  61      54.016 -79.308   9.201  1.00 14.60           O  
ATOM    241  N   GLN A  62      51.941 -78.548   9.667  1.00 13.97           N  
ATOM    242  CA  GLN A  62      51.708 -79.478  10.781  1.00 15.52           C  
ATOM    243  C   GLN A  62      50.686 -80.560  10.425  1.00 13.94           C  
ATOM    244  O   GLN A  62      50.033 -80.509   9.383  1.00 12.15           O  
ATOM    245  N   LYS A  63      50.589 -81.553  11.309  1.00 11.73           N  
ATOM    246  CA  LYS A  63      49.670 -82.662  11.065  1.00 11.97           C  
ATOM    247  C   LYS A  63      48.258 -82.167  10.745  1.00 10.41           C  
ATOM    248  O   LYS A  63      47.780 -81.185  11.312  1.00  9.59           O  
ATOM    249  N   GLU A  64      47.616 -82.862   9.808  1.00 10.04           N  
ATOM    250  CA  GLU A  64      46.264 -82.529   9.353  1.00 10.94           C  
ATOM    251  C   GLU A  64      46.200 -81.202   8.609  1.00  9.74           C  
ATOM    252  O   GLU A  64      45.125 -80.617   8.477  1.00  9.42           O  
ATOM    253  N   SER A  65      47.319 -80.760   8.056  1.00  6.85           N  
ATOM    254  CA  SER A  65      47.340 -79.548   7.252  1.00  6.90           C  
ATOM    255  C   SER A  65      46.768 -79.883   5.881  1.00  4.72           C  
ATOM    256  O   SER A  65      46.926 -81.004   5.395  1.00  3.91           O  
ATOM    257  N   THR A  66      46.109 -78.905   5.246  1.00  4.48           N  
ATOM    258  CA  THR A  66      45.524 -79.104   3.919  1.00  3.80           C  
ATOM    259  C   THR A  66      46.304 -78.292   2.886  1.00  4.60           C  
ATOM    260  O   THR A  66      46.463 -77.078   3.012  1.00  5.33           O  
ATOM    261  N   LEU A  67      46.750 -78.987   1.845  1.00  4.17           N  
ATOM    262  CA  LEU A  67      47.479 -78.378   0.737  1.00  3.85           C  
ATOM    263  C   LEU A  67      46.524 -78.284  -0.447  1.00  3.80           C  
ATOM    264  O   LEU A  67      45.552 -79.028  -0.536  1.00  5.54           O  
ATOM    265  N   HIS A  68      46.817 -77.359  -1.362  1.00  2.94           N  
ATOM    266  CA  HIS A  68      45.995 -77.172  -2.558  1.00  4.17           C  
ATOM    267  C   HIS A  68      46.817 -77.531  -3.791  1.00  5.32           C  
ATOM    268  O   HIS A  68      47.964 -77.104  -3.930  1.00  7.70           O  
ATOM    269  N   LEU A  69      46.225 -78.326  -4.683  1.00  5.29           N  
ATOM    270  CA  LEU A  69      46.897 -78.756  -5.909  1.00  3.97           C  
ATOM    271  C   LEU A  69      46.277 -78.043  -7.105  1.00  5.07           C  
ATOM    272  O   LEU A  69      45.057 -78.029  -7.272  1.00  4.34           O  
ATOM    273  N   VAL A  70      47.138 -77.475  -7.955  1.00  4.29           N  
ATOM    274  CA  VAL A  70      46.730 -76.777  -9.171  1.00  6.26           C  
ATOM    275  C   VAL A  70      47.391 -77.487 -10.346  1.00  9.22           C  
ATOM    276  O   VAL A  70      48.579 -77.799 -10.316  1.00  9.36           O  
TER
ENDMDL
