# Supplementary material for: ENCORE: Software for Quantitative Ensemble Comparison
Source: PLoS Comput Biol. 2015 Oct 27;11(10):e1004415. doi: 10.1371/journal.pcbi.1004415 (PMC4624683; doi:10.1371/journal.pcbi.1004415)
Supplement: S1 Software — (GZ) [file pcbi.1004415.s001.gz › encore-master/examples/experimental_ubq_ensembles/filtered_1XQQ.pdb]

MODEL      1
ATOM      1  N   GLN A   2     -10.076   6.499  -2.320  1.00  9.27           N  
ATOM      2  CA  GLN A   2      -8.754   6.915  -1.967  1.00  9.07           C  
ATOM      3  C   GLN A   2      -8.312   6.539  -0.595  1.00  8.72           C  
ATOM      4  O   GLN A   2      -9.142   6.468   0.310  1.00  8.22           O  
ATOM      5  N   ILE A   3      -7.027   6.231  -0.346  1.00  5.87           N  
ATOM      6  CA  ILE A   3      -6.443   5.997   0.938  1.00  5.07           C  
ATOM      7  C   ILE A   3      -5.275   6.922   0.932  1.00  4.01           C  
ATOM      8  O   ILE A   3      -5.017   7.764   0.074  1.00  4.61           O  
ATOM      9  N   PHE A   4      -4.518   6.816   2.038  1.00  4.55           N  
ATOM     10  CA  PHE A   4      -3.279   7.508   2.216  1.00  4.68           C  
ATOM     11  C   PHE A   4      -2.083   6.656   2.466  1.00  5.30           C  
ATOM     12  O   PHE A   4      -2.115   5.881   3.421  1.00  5.58           O  
ATOM     13  N   VAL A   5      -0.937   6.804   1.778  1.00  4.44           N  
ATOM     14  CA  VAL A   5       0.244   6.031   2.008  1.00  3.87           C  
ATOM     15  C   VAL A   5       1.301   6.968   2.484  1.00  4.93           C  
ATOM     16  O   VAL A   5       1.572   7.963   1.813  1.00  6.84           O  
ATOM     17  N   LYS A   6       2.015   6.612   3.567  1.00  6.04           N  
ATOM     18  CA  LYS A   6       3.006   7.422   4.206  1.00  6.12           C  
ATOM     19  C   LYS A   6       4.295   6.684   4.096  1.00  6.57           C  
ATOM     20  O   LYS A   6       4.390   5.513   4.460  1.00  5.76           O  
ATOM     21  N   THR A   7       5.339   7.368   3.595  1.00  7.41           N  
ATOM     22  CA  THR A   7       6.688   6.893   3.588  1.00  7.48           C  
ATOM     23  C   THR A   7       7.400   6.912   4.896  1.00  8.75           C  
ATOM     24  O   THR A   7       6.836   7.391   5.879  1.00  8.58           O  
ATOM     25  N   LEU A   8       8.667   6.460   4.901  1.00  9.84           N  
ATOM     26  CA  LEU A   8       9.424   6.415   6.114  1.00 14.15           C  
ATOM     27  C   LEU A   8       9.595   7.689   6.868  1.00 17.37           C  
ATOM     28  O   LEU A   8       9.205   7.895   8.016  1.00 17.01           O  
ATOM     29  N   THR A   9      10.184   8.696   6.199  1.00 18.33           N  
ATOM     30  CA  THR A   9      10.446  10.024   6.663  1.00 19.24           C  
ATOM     31  C   THR A   9       9.228  10.815   6.996  1.00 19.48           C  
ATOM     32  O   THR A   9       9.095  11.592   7.940  1.00 23.14           O  
ATOM     33  N   GLY A  10       8.234  10.586   6.119  1.00 19.43           N  
ATOM     34  CA  GLY A  10       6.927  11.143   6.286  1.00 18.74           C  
ATOM     35  C   GLY A  10       6.447  12.008   5.172  1.00 17.62           C  
ATOM     36  O   GLY A  10       5.835  13.064   5.323  1.00 19.74           O  
ATOM     37  N   LYS A  11       6.532  11.561   3.906  1.00 13.56           N  
ATOM     38  CA  LYS A  11       5.776  12.095   2.816  1.00 11.91           C  
ATOM     39  C   LYS A  11       4.487  11.356   2.704  1.00 10.18           C  
ATOM     40  O   LYS A  11       4.508  10.127   2.663  1.00  9.10           O  
ATOM     41  N   THR A  12       3.347  12.067   2.633  1.00  9.63           N  
ATOM     42  CA  THR A  12       2.153  11.360   2.286  1.00  9.85           C  
ATOM     43  C   THR A  12       1.853  11.345   0.826  1.00 11.66           C  
ATOM     44  O   THR A  12       1.880  12.380   0.162  1.00 12.33           O  
ATOM     45  N   ILE A  13       1.643  10.156   0.234  1.00 10.42           N  
ATOM     46  CA  ILE A  13       1.309   9.793  -1.108  1.00 11.84           C  
ATOM     47  C   ILE A  13      -0.145   9.465  -1.082  1.00 10.55           C  
ATOM     48  O   ILE A  13      -0.580   8.563  -0.368  1.00 11.92           O  
ATOM     49  N   THR A  14      -1.016  10.363  -1.575  1.00  9.39           N  
ATOM     50  CA  THR A  14      -2.428  10.145  -1.652  1.00  9.63           C  
ATOM     51  C   THR A  14      -2.656   9.196  -2.777  1.00 11.20           C  
ATOM     52  O   THR A  14      -2.107   9.415  -3.855  1.00 11.63           O  
ATOM     53  N   LEU A  15      -3.444   8.119  -2.610  1.00  8.29           N  
ATOM     54  CA  LEU A  15      -3.468   7.045  -3.555  1.00  9.03           C  
ATOM     55  C   LEU A  15      -4.799   6.415  -3.785  1.00  8.59           C  
ATOM     56  O   LEU A  15      -5.427   6.099  -2.776  1.00  7.79           O  
ATOM     57  N   GLU A  16      -5.291   6.253  -5.026  1.00 11.04           N  
ATOM     58  CA  GLU A  16      -6.604   5.761  -5.308  1.00 11.50           C  
ATOM     59  C   GLU A  16      -6.645   4.342  -5.762  1.00 10.13           C  
ATOM     60  O   GLU A  16      -5.776   3.811  -6.452  1.00  9.83           O  
ATOM     61  N   VAL A  17      -7.700   3.643  -5.308  1.00  8.99           N  
ATOM     62  CA  VAL A  17      -7.753   2.216  -5.227  1.00  8.85           C  
ATOM     63  C   VAL A  17      -9.162   1.731  -5.208  1.00  8.04           C  
ATOM     64  O   VAL A  17     -10.141   2.459  -5.053  1.00  8.99           O  
ATOM     65  N   GLU A  18      -9.337   0.418  -5.440  1.00  7.29           N  
ATOM     66  CA  GLU A  18     -10.603  -0.225  -5.610  1.00  7.08           C  
ATOM     67  C   GLU A  18     -10.775  -1.368  -4.668  1.00  6.45           C  
ATOM     68  O   GLU A  18      -9.796  -2.107  -4.573  1.00  5.28           O  
ATOM     69  N   PRO A  19     -11.756  -1.514  -3.829  1.00  7.24           N  
ATOM     70  CA  PRO A  19     -11.672  -2.268  -2.611  1.00  7.07           C  
ATOM     71  C   PRO A  19     -11.783  -3.749  -2.732  1.00  6.65           C  
ATOM     72  O   PRO A  19     -11.278  -4.481  -1.882  1.00  6.37           O  
ATOM     73  N   SER A  20     -12.364  -4.245  -3.838  1.00  6.80           N  
ATOM     74  CA  SER A  20     -12.410  -5.620  -4.229  1.00  6.28           C  
ATOM     75  C   SER A  20     -11.334  -6.007  -5.184  1.00  8.45           C  
ATOM     76  O   SER A  20     -11.379  -7.096  -5.754  1.00  7.26           O  
ATOM     77  N   ASP A  21     -10.355  -5.133  -5.481  1.00  7.50           N  
ATOM     78  CA  ASP A  21      -9.154  -5.451  -6.188  1.00  7.70           C  
ATOM     79  C   ASP A  21      -8.117  -5.628  -5.133  1.00  7.08           C  
ATOM     80  O   ASP A  21      -8.409  -5.495  -3.945  1.00  8.11           O  
ATOM     81  N   THR A  22      -6.880  -5.993  -5.516  1.00  5.37           N  
ATOM     82  CA  THR A  22      -5.945  -6.625  -4.638  1.00  6.01           C  
ATOM     83  C   THR A  22      -4.892  -5.669  -4.193  1.00  8.01           C  
ATOM     84  O   THR A  22      -4.725  -4.545  -4.664  1.00  8.11           O  
ATOM     85  N   ILE A  23      -4.029  -6.096  -3.254  1.00  8.32           N  
ATOM     86  CA  ILE A  23      -2.914  -5.336  -2.780  1.00  9.92           C  
ATOM     87  C   ILE A  23      -1.872  -5.090  -3.816  1.00 10.01           C  
ATOM     88  O   ILE A  23      -1.105  -4.132  -3.902  1.00  8.71           O  
ATOM     89  N   GLU A  24      -1.741  -6.019  -4.780  1.00  9.54           N  
ATOM     90  CA  GLU A  24      -1.043  -5.852  -6.016  1.00 11.81           C  
ATOM     91  C   GLU A  24      -1.506  -4.697  -6.837  1.00 11.14           C  
ATOM     92  O   GLU A  24      -0.659  -4.022  -7.421  1.00 10.62           O  
ATOM     93  N   ASN A  25      -2.830  -4.472  -6.900  1.00  9.43           N  
ATOM     94  CA  ASN A  25      -3.297  -3.261  -7.500  1.00 10.96           C  
ATOM     95  C   ASN A  25      -2.942  -2.039  -6.724  1.00  9.68           C  
ATOM     96  O   ASN A  25      -2.862  -0.943  -7.276  1.00  9.33           O  
ATOM     97  N   VAL A  26      -2.762  -2.159  -5.397  1.00  6.52           N  
ATOM     98  CA  VAL A  26      -2.325  -0.970  -4.733  1.00  5.53           C  
ATOM     99  C   VAL A  26      -0.905  -0.672  -5.073  1.00  4.42           C  
ATOM    100  O   VAL A  26      -0.471   0.437  -5.381  1.00  3.40           O  
ATOM    101  N   LYS A  27      -0.058  -1.717  -5.076  1.00  2.64           N  
ATOM    102  CA  LYS A  27       1.332  -1.577  -5.381  1.00  4.14           C  
ATOM    103  C   LYS A  27       1.685  -1.113  -6.752  1.00  5.58           C  
ATOM    104  O   LYS A  27       2.680  -0.407  -6.910  1.00  4.11           O  
ATOM    105  N   ALA A  28       0.916  -1.470  -7.796  1.00  6.61           N  
ATOM    106  CA  ALA A  28       1.157  -0.922  -9.095  1.00  7.74           C  
ATOM    107  C   ALA A  28       0.983   0.540  -9.326  1.00  9.17           C  
ATOM    108  O   ALA A  28       1.486   1.120 -10.287  1.00 11.45           O  
ATOM    109  N   LYS A  29       0.318   1.259  -8.404  1.00  8.96           N  
ATOM    110  CA  LYS A  29       0.171   2.680  -8.462  1.00  7.90           C  
ATOM    111  C   LYS A  29       1.315   3.436  -7.878  1.00  6.92           C  
ATOM    112  O   LYS A  29       1.793   4.455  -8.374  1.00  6.87           O  
ATOM    113  N   ILE A  30       1.838   2.902  -6.760  1.00  4.57           N  
ATOM    114  CA  ILE A  30       3.028   3.245  -6.046  1.00  5.58           C  
ATOM    115  C   ILE A  30       4.263   3.029  -6.851  1.00  7.26           C  
ATOM    116  O   ILE A  30       5.177   3.851  -6.906  1.00  9.46           O  
ATOM    117  N   GLN A  31       4.271   1.904  -7.587  1.00  7.06           N  
ATOM    118  CA  GLN A  31       5.250   1.568  -8.574  1.00  8.67           C  
ATOM    119  C   GLN A  31       5.215   2.436  -9.785  1.00 10.90           C  
ATOM    120  O   GLN A  31       6.264   2.683 -10.376  1.00  9.63           O  
ATOM    121  N   ASP A  32       4.086   2.994 -10.260  1.00 10.93           N  
ATOM    122  CA  ASP A  32       4.029   3.955 -11.317  1.00 14.01           C  
ATOM    123  C   ASP A  32       4.580   5.243 -10.808  1.00 14.04           C  
ATOM    124  O   ASP A  32       5.602   5.750 -11.268  1.00 13.39           O  
ATOM    125  N   LYS A  33       3.916   5.748  -9.753  1.00 14.22           N  
ATOM    126  CA  LYS A  33       4.210   7.001  -9.128  1.00 14.00           C  
ATOM    127  C   LYS A  33       5.595   7.344  -8.697  1.00 12.37           C  
ATOM    128  O   LYS A  33       6.264   8.251  -9.189  1.00 12.17           O  
ATOM    129  N   GLU A  34       6.073   6.603  -7.682  1.00 10.11           N  
ATOM    130  CA  GLU A  34       7.365   6.767  -7.090  1.00 10.07           C  
ATOM    131  C   GLU A  34       8.448   5.966  -7.727  1.00  9.32           C  
ATOM    132  O   GLU A  34       9.508   6.501  -8.050  1.00 11.61           O  
ATOM    133  N   GLY A  35       8.093   4.682  -7.909  1.00  7.22           N  
ATOM    134  CA  GLY A  35       8.986   3.743  -8.513  1.00  6.29           C  
ATOM    135  C   GLY A  35       9.766   2.913  -7.553  1.00  6.93           C  
ATOM    136  O   GLY A  35      10.974   3.090  -7.404  1.00  7.41           O  
ATOM    137  N   ILE A  36       9.064   1.974  -6.894  1.00  5.86           N  
ATOM    138  CA  ILE A  36       9.687   1.032  -6.016  1.00  6.07           C  
ATOM    139  C   ILE A  36       9.174  -0.284  -6.490  1.00  6.36           C  
ATOM    140  O   ILE A  36       7.965  -0.393  -6.690  1.00  6.18           O  
ATOM    141  N   PRO A  37       9.909  -1.333  -6.713  1.00  8.65           N  
ATOM    142  CA  PRO A  37       9.284  -2.494  -7.277  1.00  9.18           C  
ATOM    143  C   PRO A  37       8.608  -3.342  -6.256  1.00  9.85           C  
ATOM    144  O   PRO A  37       8.926  -3.148  -5.084  1.00  8.51           O  
ATOM    145  N   PRO A  38       7.661  -4.183  -6.549  1.00  8.71           N  
ATOM    146  CA  PRO A  38       6.643  -4.581  -5.619  1.00  9.08           C  
ATOM    147  C   PRO A  38       7.195  -5.511  -4.594  1.00  9.28           C  
ATOM    148  O   PRO A  38       6.525  -5.640  -3.571  1.00  6.50           O  
ATOM    149  N   ASP A  39       8.325  -6.212  -4.799  1.00 11.20           N  
ATOM    150  CA  ASP A  39       9.082  -6.939  -3.828  1.00 14.96           C  
ATOM    151  C   ASP A  39       9.696  -6.056  -2.797  1.00 13.99           C  
ATOM    152  O   ASP A  39       9.766  -6.405  -1.620  1.00 13.75           O  
ATOM    153  N   GLN A  40      10.240  -4.894  -3.202  1.00 11.60           N  
ATOM    154  CA  GLN A  40      10.828  -3.944  -2.309  1.00 10.76           C  
ATOM    155  C   GLN A  40       9.806  -3.136  -1.586  1.00  8.01           C  
ATOM    156  O   GLN A  40      10.084  -2.556  -0.538  1.00  8.96           O  
ATOM    157  N   GLN A  41       8.659  -2.799  -2.202  1.00  6.52           N  
ATOM    158  CA  GLN A  41       7.551  -2.300  -1.448  1.00  3.87           C  
ATOM    159  C   GLN A  41       6.933  -3.109  -0.360  1.00  4.79           C  
ATOM    160  O   GLN A  41       6.435  -4.189  -0.674  1.00  6.34           O  
ATOM    161  N   ARG A  42       6.857  -2.560   0.866  1.00  5.73           N  
ATOM    162  CA  ARG A  42       6.209  -3.247   1.939  1.00  6.97           C  
ATOM    163  C   ARG A  42       5.192  -2.347   2.553  1.00  7.15           C  
ATOM    164  O   ARG A  42       5.508  -1.255   3.023  1.00  7.33           O  
ATOM    165  N   LEU A  43       3.899  -2.715   2.567  1.00  4.65           N  
ATOM    166  CA  LEU A  43       2.836  -1.866   3.007  1.00  3.51           C  
ATOM    167  C   LEU A  43       2.314  -2.455   4.272  1.00  5.56           C  
ATOM    168  O   LEU A  43       1.701  -3.521   4.239  1.00  4.19           O  
ATOM    169  N   ILE A  44       2.396  -1.645   5.343  1.00  4.58           N  
ATOM    170  CA  ILE A  44       1.972  -1.865   6.691  1.00  5.55           C  
ATOM    171  C   ILE A  44       0.735  -1.112   7.041  1.00  5.46           C  
ATOM    172  O   ILE A  44       0.733   0.114   7.135  1.00  6.04           O  
ATOM    173  N   PHE A  45      -0.401  -1.793   7.279  1.00  6.75           N  
ATOM    174  CA  PHE A  45      -1.560  -1.226   7.895  1.00  4.70           C  
ATOM    175  C   PHE A  45      -1.518  -1.635   9.327  1.00  6.34           C  
ATOM    176  O   PHE A  45      -1.452  -2.796   9.726  1.00  5.45           O  
ATOM    177  N   ALA A  46      -1.491  -0.603  10.189  1.00  6.53           N  
ATOM    178  CA  ALA A  46      -1.398  -0.813  11.601  1.00  7.15           C  
ATOM    179  C   ALA A  46      -0.134  -1.431  12.091  1.00  9.00           C  
ATOM    180  O   ALA A  46       0.943  -0.897  12.355  1.00 11.15           O  
ATOM    181  N   GLY A  47      -0.203  -2.740  12.392  1.00  9.35           N  
ATOM    182  CA  GLY A  47       0.982  -3.536  12.471  1.00 11.68           C  
ATOM    183  C   GLY A  47       0.697  -4.889  11.915  1.00 11.14           C  
ATOM    184  O   GLY A  47       0.966  -5.900  12.561  1.00 13.93           O  
ATOM    185  N   LYS A  48       0.203  -4.970  10.667  1.00 10.47           N  
ATOM    186  CA  LYS A  48       0.170  -6.145   9.853  1.00  8.82           C  
ATOM    187  C   LYS A  48       0.625  -5.737   8.494  1.00  7.68           C  
ATOM    188  O   LYS A  48       0.170  -4.742   7.932  1.00  6.47           O  
ATOM    189  N   GLN A  49       1.446  -6.584   7.848  1.00  8.89           N  
ATOM    190  CA  GLN A  49       1.698  -6.444   6.447  1.00  7.18           C  
ATOM    191  C   GLN A  49       0.612  -7.075   5.645  1.00  8.23           C  
ATOM    192  O   GLN A  49       0.225  -8.220   5.874  1.00  9.70           O  
ATOM    193  N   LEU A  50       0.132  -6.355   4.615  1.00  6.51           N  
ATOM    194  CA  LEU A  50      -0.956  -6.820   3.812  1.00  7.41           C  
ATOM    195  C   LEU A  50      -0.623  -7.857   2.795  1.00  8.27           C  
ATOM    196  O   LEU A  50       0.419  -7.719   2.156  1.00  8.34           O  
ATOM    197  N   GLU A  51      -1.365  -8.974   2.698  1.00  9.43           N  
ATOM    198  CA  GLU A  51      -0.947  -9.983   1.774  1.00 11.90           C  
ATOM    199  C   GLU A  51      -1.290  -9.532   0.396  1.00 11.49           C  
ATOM    200  O   GLU A  51      -2.171  -8.727   0.101  1.00  9.88           O  
ATOM    201  N   ASP A  52      -0.648 -10.099  -0.641  1.00 12.71           N  
ATOM    202  CA  ASP A  52      -0.646  -9.642  -1.996  1.00 16.56           C  
ATOM    203  C   ASP A  52      -1.990  -9.849  -2.607  1.00 15.83           C  
ATOM    204  O   ASP A  52      -2.523  -8.906  -3.189  1.00 17.21           O  
ATOM    205  N   GLY A  53      -2.551 -11.070  -2.554  1.00 15.00           N  
ATOM    206  CA  GLY A  53      -3.596 -11.629  -3.353  1.00 11.77           C  
ATOM    207  C   GLY A  53      -4.917 -11.604  -2.666  1.00 11.10           C  
ATOM    208  O   GLY A  53      -5.808 -12.377  -3.014  1.00 11.25           O  
ATOM    209  N   ARG A  54      -4.997 -10.659  -1.712  1.00  8.53           N  
ATOM    210  CA  ARG A  54      -6.164 -10.410  -0.925  1.00  9.05           C  
ATOM    211  C   ARG A  54      -6.613  -9.026  -1.246  1.00  8.96           C  
ATOM    212  O   ARG A  54      -5.893  -8.161  -1.743  1.00 11.60           O  
ATOM    213  N   THR A  55      -7.890  -8.748  -0.932  1.00  9.05           N  
ATOM    214  CA  THR A  55      -8.447  -7.457  -1.195  1.00  9.03           C  
ATOM    215  C   THR A  55      -8.387  -6.536  -0.025  1.00  8.15           C  
ATOM    216  O   THR A  55      -7.794  -6.760   1.029  1.00  5.91           O  
ATOM    217  N   LEU A  56      -8.855  -5.292  -0.227  1.00  6.91           N  
ATOM    218  CA  LEU A  56      -8.864  -4.330   0.831  1.00  8.29           C  
ATOM    219  C   LEU A  56      -9.987  -4.540   1.788  1.00  8.05           C  
ATOM    220  O   LEU A  56      -9.882  -4.350   2.998  1.00 10.17           O  
ATOM    221  N   SER A  57     -11.097  -5.087   1.260  1.00  8.92           N  
ATOM    222  CA  SER A  57     -12.185  -5.564   2.056  1.00  9.00           C  
ATOM    223  C   SER A  57     -11.855  -6.684   2.982  1.00  9.44           C  
ATOM    224  O   SER A  57     -12.546  -6.849   3.987  1.00 10.91           O  
ATOM    225  N   ASP A  58     -10.755  -7.422   2.754  1.00  9.11           N  
ATOM    226  CA  ASP A  58     -10.440  -8.580   3.532  1.00  7.91           C  
ATOM    227  C   ASP A  58      -9.882  -8.085   4.822  1.00  9.12           C  
ATOM    228  O   ASP A  58     -10.287  -8.512   5.902  1.00  8.61           O  
ATOM    229  N   TYR A  59      -8.963  -7.115   4.669  1.00  7.97           N  
ATOM    230  CA  TYR A  59      -8.290  -6.524   5.784  1.00  8.45           C  
ATOM    231  C   TYR A  59      -9.154  -5.603   6.574  1.00 10.98           C  
ATOM    232  O   TYR A  59      -9.003  -5.476   7.788  1.00 12.95           O  
ATOM    233  N   ASN A  60     -10.085  -4.969   5.840  1.00 12.38           N  
ATOM    234  CA  ASN A  60     -11.072  -4.007   6.222  1.00 13.94           C  
ATOM    235  C   ASN A  60     -10.438  -2.660   6.148  1.00 14.16           C  
ATOM    236  O   ASN A  60     -10.426  -1.895   7.110  1.00 14.26           O  
ATOM    237  N   ILE A  61      -9.842  -2.344   4.984  1.00 11.08           N  
ATOM    238  CA  ILE A  61      -9.244  -1.078   4.694  1.00 11.78           C  
ATOM    239  C   ILE A  61     -10.285  -0.416   3.858  1.00 13.74           C  
ATOM    240  O   ILE A  61     -10.801  -0.941   2.873  1.00 14.60           O  
ATOM    241  N   GLN A  62     -10.593   0.848   4.198  1.00 13.97           N  
ATOM    242  CA  GLN A  62     -11.632   1.674   3.667  1.00 15.52           C  
ATOM    243  C   GLN A  62     -11.143   3.008   3.217  1.00 13.94           C  
ATOM    244  O   GLN A  62      -9.983   3.386   3.373  1.00 12.15           O  
ATOM    245  N   LYS A  63     -12.059   3.813   2.651  1.00 11.73           N  
ATOM    246  CA  LYS A  63     -11.783   5.174   2.308  1.00 11.97           C  
ATOM    247  C   LYS A  63     -11.195   6.030   3.376  1.00 10.41           C  
ATOM    248  O   LYS A  63     -11.612   6.104   4.530  1.00  9.59           O  
ATOM    249  N   GLU A  64     -10.078   6.679   3.002  1.00 10.04           N  
ATOM    250  CA  GLU A  64      -9.332   7.519   3.888  1.00 10.94           C  
ATOM    251  C   GLU A  64      -8.714   6.850   5.067  1.00  9.74           C  
ATOM    252  O   GLU A  64      -8.822   7.247   6.226  1.00  9.42           O  
ATOM    253  N   SER A  65      -7.954   5.769   4.816  1.00  6.85           N  
ATOM    254  CA  SER A  65      -7.257   4.924   5.735  1.00  6.90           C  
ATOM    255  C   SER A  65      -5.806   5.133   5.467  1.00  4.72           C  
ATOM    256  O   SER A  65      -5.390   5.262   4.317  1.00  3.91           O  
ATOM    257  N   THR A  66      -4.967   5.066   6.516  1.00  4.48           N  
ATOM    258  CA  THR A  66      -3.553   5.265   6.429  1.00  3.80           C  
ATOM    259  C   THR A  66      -2.723   4.027   6.432  1.00  4.60           C  
ATOM    260  O   THR A  66      -2.727   3.194   7.336  1.00  5.33           O  
ATOM    261  N   LEU A  67      -1.955   3.771   5.358  1.00  4.17           N  
ATOM    262  CA  LEU A  67      -1.051   2.674   5.206  1.00  3.85           C  
ATOM    263  C   LEU A  67       0.316   3.263   5.274  1.00  3.80           C  
ATOM    264  O   LEU A  67       0.549   4.386   4.831  1.00  5.54           O  
ATOM    265  N   HIS A  68       1.273   2.512   5.848  1.00  2.94           N  
ATOM    266  CA  HIS A  68       2.637   2.936   5.921  1.00  4.17           C  
ATOM    267  C   HIS A  68       3.551   2.166   5.031  1.00  5.32           C  
ATOM    268  O   HIS A  68       3.685   0.944   5.034  1.00  7.70           O  
ATOM    269  N   LEU A  69       4.333   2.907   4.225  1.00  5.29           N  
ATOM    270  CA  LEU A  69       5.217   2.444   3.201  1.00  3.97           C  
ATOM    271  C   LEU A  69       6.597   2.518   3.758  1.00  5.07           C  
ATOM    272  O   LEU A  69       7.134   3.559   4.131  1.00  4.34           O  
ATOM    273  N   VAL A  70       7.144   1.306   3.961  1.00  4.29           N  
ATOM    274  CA  VAL A  70       8.509   1.134   4.351  1.00  6.26           C  
ATOM    275  C   VAL A  70       8.993   0.083   3.411  1.00  9.22           C  
ATOM    276  O   VAL A  70       8.218  -0.518   2.670  1.00  9.36           O  
TER
ENDMDL
MODEL      2
ATOM      1  N   GLN A   2     -10.387   6.512  -0.422  1.00  9.27           N  
ATOM      2  CA  GLN A   2      -9.052   7.026  -0.398  1.00  9.07           C  
ATOM      3  C   GLN A   2      -8.519   6.332   0.809  1.00  8.72           C  
ATOM      4  O   GLN A   2      -9.186   6.038   1.800  1.00  8.22           O  
ATOM      5  N   ILE A   3      -7.233   5.947   0.740  1.00  5.87           N  
ATOM      6  CA  ILE A   3      -6.448   5.451   1.828  1.00  5.07           C  
ATOM      7  C   ILE A   3      -5.290   6.366   2.026  1.00  4.01           C  
ATOM      8  O   ILE A   3      -4.924   7.187   1.186  1.00  4.61           O  
ATOM      9  N   PHE A   4      -4.670   6.188   3.206  1.00  4.55           N  
ATOM     10  CA  PHE A   4      -3.424   6.821   3.509  1.00  4.68           C  
ATOM     11  C   PHE A   4      -2.426   5.748   3.242  1.00  5.30           C  
ATOM     12  O   PHE A   4      -2.355   4.672   3.835  1.00  5.58           O  
ATOM     13  N   VAL A   5      -1.479   6.046   2.335  1.00  4.44           N  
ATOM     14  CA  VAL A   5      -0.246   5.335   2.475  1.00  3.87           C  
ATOM     15  C   VAL A   5       0.780   6.275   3.011  1.00  4.93           C  
ATOM     16  O   VAL A   5       1.118   7.332   2.481  1.00  6.84           O  
ATOM     17  N   LYS A   6       1.225   5.999   4.250  1.00  6.04           N  
ATOM     18  CA  LYS A   6       2.222   6.811   4.876  1.00  6.12           C  
ATOM     19  C   LYS A   6       3.613   6.429   4.503  1.00  6.57           C  
ATOM     20  O   LYS A   6       3.949   5.248   4.574  1.00  5.76           O  
ATOM     21  N   THR A   7       4.560   7.320   4.161  1.00  7.41           N  
ATOM     22  CA  THR A   7       5.918   6.957   3.899  1.00  7.48           C  
ATOM     23  C   THR A   7       6.632   7.032   5.204  1.00  8.75           C  
ATOM     24  O   THR A   7       6.040   7.330   6.241  1.00  8.58           O  
ATOM     25  N   LEU A   8       7.940   6.719   5.183  1.00  9.84           N  
ATOM     26  CA  LEU A   8       8.693   6.704   6.399  1.00 14.15           C  
ATOM     27  C   LEU A   8       8.933   8.078   6.921  1.00 17.37           C  
ATOM     28  O   LEU A   8       8.798   8.488   8.073  1.00 17.01           O  
ATOM     29  N   THR A   9       9.306   8.881   5.909  1.00 18.33           N  
ATOM     30  CA  THR A   9       9.842  10.197   6.069  1.00 19.24           C  
ATOM     31  C   THR A   9       8.843  11.274   6.323  1.00 19.48           C  
ATOM     32  O   THR A   9       8.658  11.622   7.488  1.00 23.14           O  
ATOM     33  N   GLY A  10       8.130  11.773   5.298  1.00 19.43           N  
ATOM     34  CA  GLY A  10       7.254  12.895   5.437  1.00 18.74           C  
ATOM     35  C   GLY A  10       6.382  13.115   4.249  1.00 17.62           C  
ATOM     36  O   GLY A  10       6.208  14.237   3.775  1.00 19.74           O  
ATOM     37  N   LYS A  11       5.699  12.056   3.779  1.00 13.56           N  
ATOM     38  CA  LYS A  11       4.588  12.190   2.889  1.00 11.91           C  
ATOM     39  C   LYS A  11       3.496  11.234   3.226  1.00 10.18           C  
ATOM     40  O   LYS A  11       3.751  10.087   3.589  1.00  9.10           O  
ATOM     41  N   THR A  12       2.222  11.665   3.207  1.00  9.63           N  
ATOM     42  CA  THR A  12       1.095  10.794   3.341  1.00  9.85           C  
ATOM     43  C   THR A  12       0.227  10.873   2.133  1.00 11.66           C  
ATOM     44  O   THR A  12      -0.511  11.813   1.842  1.00 12.33           O  
ATOM     45  N   ILE A  13       0.372   9.820   1.308  1.00 10.42           N  
ATOM     46  CA  ILE A  13      -0.090   9.735  -0.043  1.00 11.84           C  
ATOM     47  C   ILE A  13      -1.547   9.427  -0.005  1.00 10.55           C  
ATOM     48  O   ILE A  13      -1.838   8.415   0.630  1.00 11.92           O  
ATOM     49  N   THR A  14      -2.486  10.224  -0.546  1.00  9.39           N  
ATOM     50  CA  THR A  14      -3.897  10.045  -0.397  1.00  9.63           C  
ATOM     51  C   THR A  14      -4.448   9.503  -1.671  1.00 11.20           C  
ATOM     52  O   THR A  14      -4.660  10.204  -2.660  1.00 11.63           O  
ATOM     53  N   LEU A  15      -4.533   8.161  -1.677  1.00  8.29           N  
ATOM     54  CA  LEU A  15      -4.596   7.289  -2.809  1.00  9.03           C  
ATOM     55  C   LEU A  15      -5.976   6.740  -2.923  1.00  8.59           C  
ATOM     56  O   LEU A  15      -6.487   6.068  -2.028  1.00  7.79           O  
ATOM     57  N   GLU A  16      -6.673   7.074  -4.024  1.00 11.04           N  
ATOM     58  CA  GLU A  16      -7.950   6.541  -4.382  1.00 11.50           C  
ATOM     59  C   GLU A  16      -7.848   5.136  -4.868  1.00 10.13           C  
ATOM     60  O   GLU A  16      -7.239   4.824  -5.890  1.00  9.83           O  
ATOM     61  N   VAL A  17      -8.539   4.252  -4.127  1.00  8.99           N  
ATOM     62  CA  VAL A  17      -8.636   2.879  -4.515  1.00  8.85           C  
ATOM     63  C   VAL A  17     -10.056   2.444  -4.391  1.00  8.04           C  
ATOM     64  O   VAL A  17     -10.884   3.306  -4.101  1.00  8.99           O  
ATOM     65  N   GLU A  18     -10.315   1.174  -4.751  1.00  7.29           N  
ATOM     66  CA  GLU A  18     -11.583   0.582  -4.457  1.00  7.08           C  
ATOM     67  C   GLU A  18     -11.312  -0.556  -3.535  1.00  6.45           C  
ATOM     68  O   GLU A  18     -10.152  -0.963  -3.501  1.00  5.28           O  
ATOM     69  N   PRO A  19     -12.217  -1.060  -2.748  1.00  7.24           N  
ATOM     70  CA  PRO A  19     -11.920  -2.150  -1.866  1.00  7.07           C  
ATOM     71  C   PRO A  19     -11.670  -3.497  -2.453  1.00  6.65           C  
ATOM     72  O   PRO A  19     -11.384  -4.442  -1.720  1.00  6.37           O  
ATOM     73  N   SER A  20     -11.792  -3.717  -3.774  1.00  6.80           N  
ATOM     74  CA  SER A  20     -11.539  -4.870  -4.582  1.00  6.28           C  
ATOM     75  C   SER A  20     -10.134  -4.842  -5.077  1.00  8.45           C  
ATOM     76  O   SER A  20      -9.735  -5.797  -5.743  1.00  7.26           O  
ATOM     77  N   ASP A  21      -9.301  -3.833  -4.767  1.00  7.50           N  
ATOM     78  CA  ASP A  21      -7.952  -3.704  -5.224  1.00  7.70           C  
ATOM     79  C   ASP A  21      -7.020  -4.593  -4.475  1.00  7.08           C  
ATOM     80  O   ASP A  21      -7.178  -4.836  -3.280  1.00  8.11           O  
ATOM     81  N   THR A  22      -5.954  -5.115  -5.107  1.00  5.37           N  
ATOM     82  CA  THR A  22      -5.030  -5.931  -4.383  1.00  6.01           C  
ATOM     83  C   THR A  22      -3.906  -5.130  -3.822  1.00  8.01           C  
ATOM     84  O   THR A  22      -4.027  -3.906  -3.837  1.00  8.11           O  
ATOM     85  N   ILE A  23      -2.793  -5.722  -3.353  1.00  8.32           N  
ATOM     86  CA  ILE A  23      -1.594  -5.104  -2.877  1.00  9.92           C  
ATOM     87  C   ILE A  23      -0.758  -4.866  -4.087  1.00 10.01           C  
ATOM     88  O   ILE A  23      -0.070  -3.860  -4.255  1.00  8.71           O  
ATOM     89  N   GLU A  24      -0.730  -5.800  -5.054  1.00  9.54           N  
ATOM     90  CA  GLU A  24      -0.149  -5.433  -6.308  1.00 11.81           C  
ATOM     91  C   GLU A  24      -0.761  -4.272  -7.014  1.00 11.14           C  
ATOM     92  O   GLU A  24      -0.037  -3.530  -7.676  1.00 10.62           O  
ATOM     93  N   ASN A  25      -2.085  -4.070  -6.889  1.00  9.43           N  
ATOM     94  CA  ASN A  25      -2.742  -2.939  -7.465  1.00 10.96           C  
ATOM     95  C   ASN A  25      -2.236  -1.671  -6.866  1.00  9.68           C  
ATOM     96  O   ASN A  25      -1.583  -0.845  -7.502  1.00  9.33           O  
ATOM     97  N   VAL A  26      -2.337  -1.569  -5.529  1.00  6.52           N  
ATOM     98  CA  VAL A  26      -1.870  -0.438  -4.789  1.00  5.53           C  
ATOM     99  C   VAL A  26      -0.448  -0.088  -5.064  1.00  4.42           C  
ATOM    100  O   VAL A  26      -0.138   1.062  -5.372  1.00  3.40           O  
ATOM    101  N   LYS A  27       0.520  -1.023  -5.075  1.00  2.64           N  
ATOM    102  CA  LYS A  27       1.874  -0.826  -5.490  1.00  4.14           C  
ATOM    103  C   LYS A  27       2.031  -0.261  -6.860  1.00  5.58           C  
ATOM    104  O   LYS A  27       2.860   0.600  -7.149  1.00  4.11           O  
ATOM    105  N   ALA A  28       1.209  -0.678  -7.840  1.00  6.61           N  
ATOM    106  CA  ALA A  28       1.203  -0.139  -9.164  1.00  7.74           C  
ATOM    107  C   ALA A  28       0.675   1.250  -9.269  1.00  9.17           C  
ATOM    108  O   ALA A  28       1.133   2.006 -10.124  1.00 11.45           O  
ATOM    109  N   LYS A  29      -0.301   1.590  -8.408  1.00  8.96           N  
ATOM    110  CA  LYS A  29      -0.945   2.867  -8.411  1.00  7.90           C  
ATOM    111  C   LYS A  29      -0.093   3.854  -7.690  1.00  6.92           C  
ATOM    112  O   LYS A  29      -0.080   5.050  -7.980  1.00  6.87           O  
ATOM    113  N   ILE A  30       0.802   3.430  -6.780  1.00  4.57           N  
ATOM    114  CA  ILE A  30       1.809   4.268  -6.206  1.00  5.58           C  
ATOM    115  C   ILE A  30       2.929   4.564  -7.142  1.00  7.26           C  
ATOM    116  O   ILE A  30       3.497   5.655  -7.105  1.00  9.46           O  
ATOM    117  N   GLN A  31       3.175   3.677  -8.123  1.00  7.06           N  
ATOM    118  CA  GLN A  31       4.176   3.748  -9.142  1.00  8.67           C  
ATOM    119  C   GLN A  31       3.766   4.735 -10.180  1.00 10.90           C  
ATOM    120  O   GLN A  31       4.572   5.430 -10.795  1.00  9.63           O  
ATOM    121  N   ASP A  32       2.448   4.902 -10.395  1.00 10.93           N  
ATOM    122  CA  ASP A  32       1.886   5.958 -11.178  1.00 14.01           C  
ATOM    123  C   ASP A  32       2.198   7.255 -10.515  1.00 14.04           C  
ATOM    124  O   ASP A  32       2.758   8.175 -11.110  1.00 13.39           O  
ATOM    125  N   LYS A  33       1.806   7.392  -9.236  1.00 14.22           N  
ATOM    126  CA  LYS A  33       1.670   8.645  -8.561  1.00 14.00           C  
ATOM    127  C   LYS A  33       2.979   9.180  -8.091  1.00 12.37           C  
ATOM    128  O   LYS A  33       3.188  10.376  -8.291  1.00 12.17           O  
ATOM    129  N   GLU A  34       3.862   8.350  -7.509  1.00 10.11           N  
ATOM    130  CA  GLU A  34       5.114   8.794  -6.980  1.00 10.07           C  
ATOM    131  C   GLU A  34       6.197   8.392  -7.921  1.00  9.32           C  
ATOM    132  O   GLU A  34       7.102   9.173  -8.210  1.00 11.61           O  
ATOM    133  N   GLY A  35       6.162   7.149  -8.433  1.00  7.22           N  
ATOM    134  CA  GLY A  35       7.148   6.619  -9.323  1.00  6.29           C  
ATOM    135  C   GLY A  35       8.143   5.781  -8.597  1.00  6.93           C  
ATOM    136  O   GLY A  35       9.296   5.665  -9.008  1.00  7.41           O  
ATOM    137  N   ILE A  36       7.672   5.011  -7.599  1.00  5.86           N  
ATOM    138  CA  ILE A  36       8.506   4.086  -6.896  1.00  6.07           C  
ATOM    139  C   ILE A  36       8.229   2.721  -7.425  1.00  6.36           C  
ATOM    140  O   ILE A  36       7.068   2.336  -7.557  1.00  6.18           O  
ATOM    141  N   PRO A  37       9.228   1.929  -7.680  1.00  8.65           N  
ATOM    142  CA  PRO A  37       9.066   0.594  -8.177  1.00  9.18           C  
ATOM    143  C   PRO A  37       8.391  -0.322  -7.215  1.00  9.85           C  
ATOM    144  O   PRO A  37       8.652  -0.136  -6.028  1.00  8.51           O  
ATOM    145  N   PRO A  38       7.481  -1.181  -7.568  1.00  8.71           N  
ATOM    146  CA  PRO A  38       6.687  -1.982  -6.682  1.00  9.08           C  
ATOM    147  C   PRO A  38       7.367  -3.055  -5.904  1.00  9.28           C  
ATOM    148  O   PRO A  38       6.827  -3.493  -4.889  1.00  6.50           O  
ATOM    149  N   ASP A  39       8.564  -3.507  -6.320  1.00 11.20           N  
ATOM    150  CA  ASP A  39       9.389  -4.452  -5.634  1.00 14.96           C  
ATOM    151  C   ASP A  39      10.305  -3.810  -4.649  1.00 13.99           C  
ATOM    152  O   ASP A  39      10.602  -4.362  -3.591  1.00 13.75           O  
ATOM    153  N   GLN A  40      10.680  -2.539  -4.882  1.00 11.60           N  
ATOM    154  CA  GLN A  40      11.293  -1.637  -3.957  1.00 10.76           C  
ATOM    155  C   GLN A  40      10.316  -1.279  -2.891  1.00  8.01           C  
ATOM    156  O   GLN A  40      10.685  -1.127  -1.728  1.00  8.96           O  
ATOM    157  N   GLN A  41       9.031  -1.053  -3.221  1.00  6.52           N  
ATOM    158  CA  GLN A  41       7.940  -0.955  -2.302  1.00  3.87           C  
ATOM    159  C   GLN A  41       7.632  -2.123  -1.430  1.00  4.79           C  
ATOM    160  O   GLN A  41       7.486  -3.276  -1.833  1.00  6.34           O  
ATOM    161  N   ARG A  42       7.487  -1.940  -0.106  1.00  5.73           N  
ATOM    162  CA  ARG A  42       6.966  -2.900   0.817  1.00  6.97           C  
ATOM    163  C   ARG A  42       5.912  -2.291   1.676  1.00  7.15           C  
ATOM    164  O   ARG A  42       6.129  -1.209   2.218  1.00  7.33           O  
ATOM    165  N   LEU A  43       4.740  -2.945   1.767  1.00  4.65           N  
ATOM    166  CA  LEU A  43       3.575  -2.446   2.429  1.00  3.51           C  
ATOM    167  C   LEU A  43       3.278  -3.269   3.635  1.00  5.56           C  
ATOM    168  O   LEU A  43       3.208  -4.496   3.566  1.00  4.19           O  
ATOM    169  N   ILE A  44       3.103  -2.536   4.748  1.00  4.58           N  
ATOM    170  CA  ILE A  44       2.855  -3.061   6.055  1.00  5.55           C  
ATOM    171  C   ILE A  44       1.679  -2.330   6.607  1.00  5.46           C  
ATOM    172  O   ILE A  44       1.548  -1.108   6.566  1.00  6.04           O  
ATOM    173  N   PHE A  45       0.808  -3.086   7.299  1.00  6.75           N  
ATOM    174  CA  PHE A  45      -0.286  -2.366   7.871  1.00  4.70           C  
ATOM    175  C   PHE A  45      -0.033  -1.993   9.291  1.00  6.34           C  
ATOM    176  O   PHE A  45       0.311  -0.838   9.541  1.00  5.45           O  
ATOM    177  N   ALA A  46      -0.116  -2.892  10.288  1.00  6.53           N  
ATOM    178  CA  ALA A  46       0.222  -2.556  11.636  1.00  7.15           C  
ATOM    179  C   ALA A  46       1.540  -3.223  11.836  1.00  9.00           C  
ATOM    180  O   ALA A  46       2.551  -2.547  12.019  1.00 11.15           O  
ATOM    181  N   GLY A  47       1.621  -4.566  11.826  1.00  9.35           N  
ATOM    182  CA  GLY A  47       2.802  -5.359  11.966  1.00 11.68           C  
ATOM    183  C   GLY A  47       2.838  -6.606  11.152  1.00 11.14           C  
ATOM    184  O   GLY A  47       3.713  -7.461  11.283  1.00 13.93           O  
ATOM    185  N   LYS A  48       1.862  -6.724  10.235  1.00 10.47           N  
ATOM    186  CA  LYS A  48       1.879  -7.756   9.244  1.00  8.82           C  
ATOM    187  C   LYS A  48       2.086  -7.149   7.899  1.00  7.68           C  
ATOM    188  O   LYS A  48       1.501  -6.127   7.542  1.00  6.47           O  
ATOM    189  N   GLN A  49       2.869  -7.849   7.059  1.00  8.89           N  
ATOM    190  CA  GLN A  49       3.264  -7.424   5.752  1.00  7.18           C  
ATOM    191  C   GLN A  49       2.195  -7.833   4.798  1.00  8.23           C  
ATOM    192  O   GLN A  49       1.550  -8.870   4.944  1.00  9.70           O  
ATOM    193  N   LEU A  50       1.898  -7.073   3.729  1.00  6.51           N  
ATOM    194  CA  LEU A  50       0.754  -7.399   2.936  1.00  7.41           C  
ATOM    195  C   LEU A  50       1.165  -8.159   1.723  1.00  8.27           C  
ATOM    196  O   LEU A  50       2.114  -7.719   1.076  1.00  8.34           O  
ATOM    197  N   GLU A  51       0.515  -9.302   1.442  1.00  9.43           N  
ATOM    198  CA  GLU A  51       1.022 -10.130   0.392  1.00 11.90           C  
ATOM    199  C   GLU A  51       0.177  -9.982  -0.826  1.00 11.49           C  
ATOM    200  O   GLU A  51      -0.957  -9.509  -0.761  1.00  9.88           O  
ATOM    201  N   ASP A  52       0.874 -10.195  -1.956  1.00 12.71           N  
ATOM    202  CA  ASP A  52       0.548  -9.611  -3.220  1.00 16.56           C  
ATOM    203  C   ASP A  52      -0.864  -9.667  -3.692  1.00 15.83           C  
ATOM    204  O   ASP A  52      -1.437  -8.659  -4.104  1.00 17.21           O  
ATOM    205  N   GLY A  53      -1.454 -10.875  -3.728  1.00 15.00           N  
ATOM    206  CA  GLY A  53      -2.685 -11.205  -4.378  1.00 11.77           C  
ATOM    207  C   GLY A  53      -3.792 -11.574  -3.452  1.00 11.10           C  
ATOM    208  O   GLY A  53      -4.399 -12.626  -3.643  1.00 11.25           O  
ATOM    209  N   ARG A  54      -4.059 -10.738  -2.433  1.00  8.53           N  
ATOM    210  CA  ARG A  54      -5.315 -10.587  -1.765  1.00  9.05           C  
ATOM    211  C   ARG A  54      -5.712  -9.151  -1.750  1.00  8.96           C  
ATOM    212  O   ARG A  54      -4.935  -8.223  -1.965  1.00 11.60           O  
ATOM    213  N   THR A  55      -7.012  -8.872  -1.545  1.00  9.05           N  
ATOM    214  CA  THR A  55      -7.654  -7.595  -1.573  1.00  9.03           C  
ATOM    215  C   THR A  55      -7.427  -6.848  -0.304  1.00  8.15           C  
ATOM    216  O   THR A  55      -7.291  -7.462   0.753  1.00  5.91           O  
ATOM    217  N   LEU A  56      -7.686  -5.528  -0.311  1.00  6.91           N  
ATOM    218  CA  LEU A  56      -7.813  -4.737   0.873  1.00  8.29           C  
ATOM    219  C   LEU A  56      -9.003  -5.131   1.679  1.00  8.05           C  
ATOM    220  O   LEU A  56      -9.075  -5.005   2.900  1.00 10.17           O  
ATOM    221  N   SER A  57     -10.073  -5.603   1.014  1.00  8.92           N  
ATOM    222  CA  SER A  57     -11.196  -6.081   1.758  1.00  9.00           C  
ATOM    223  C   SER A  57     -10.952  -7.333   2.528  1.00  9.44           C  
ATOM    224  O   SER A  57     -11.592  -7.445   3.572  1.00 10.91           O  
ATOM    225  N   ASP A  58     -10.078  -8.246   2.070  1.00  9.11           N  
ATOM    226  CA  ASP A  58      -9.732  -9.481   2.704  1.00  7.91           C  
ATOM    227  C   ASP A  58      -8.904  -9.132   3.892  1.00  9.12           C  
ATOM    228  O   ASP A  58      -9.169  -9.680   4.961  1.00  8.61           O  
ATOM    229  N   TYR A  59      -7.897  -8.263   3.692  1.00  7.97           N  
ATOM    230  CA  TYR A  59      -7.050  -7.876   4.778  1.00  8.45           C  
ATOM    231  C   TYR A  59      -7.586  -6.937   5.803  1.00 10.98           C  
ATOM    232  O   TYR A  59      -7.036  -6.741   6.886  1.00 12.95           O  
ATOM    233  N   ASN A  60      -8.751  -6.324   5.529  1.00 12.38           N  
ATOM    234  CA  ASN A  60      -9.420  -5.356   6.341  1.00 13.94           C  
ATOM    235  C   ASN A  60      -8.718  -4.044   6.418  1.00 14.16           C  
ATOM    236  O   ASN A  60      -8.471  -3.535   7.511  1.00 14.26           O  
ATOM    237  N   ILE A  61      -8.353  -3.552   5.221  1.00 11.08           N  
ATOM    238  CA  ILE A  61      -7.793  -2.253   5.011  1.00 11.78           C  
ATOM    239  C   ILE A  61      -8.920  -1.486   4.411  1.00 13.74           C  
ATOM    240  O   ILE A  61      -9.380  -1.645   3.281  1.00 14.60           O  
ATOM    241  N   GLN A  62      -9.486  -0.564   5.209  1.00 13.97           N  
ATOM    242  CA  GLN A  62     -10.737   0.061   4.912  1.00 15.52           C  
ATOM    243  C   GLN A  62     -10.503   1.425   4.361  1.00 13.94           C  
ATOM    244  O   GLN A  62      -9.423   1.982   4.167  1.00 12.15           O  
ATOM    245  N   LYS A  63     -11.615   2.162   4.188  1.00 11.73           N  
ATOM    246  CA  LYS A  63     -11.606   3.560   3.889  1.00 11.97           C  
ATOM    247  C   LYS A  63     -10.970   4.399   4.944  1.00 10.41           C  
ATOM    248  O   LYS A  63     -11.339   4.299   6.113  1.00  9.59           O  
ATOM    249  N   GLU A  64      -9.986   5.244   4.590  1.00 10.04           N  
ATOM    250  CA  GLU A  64      -9.223   6.119   5.424  1.00 10.94           C  
ATOM    251  C   GLU A  64      -8.331   5.517   6.454  1.00  9.74           C  
ATOM    252  O   GLU A  64      -8.162   6.172   7.482  1.00  9.42           O  
ATOM    253  N   SER A  65      -7.836   4.289   6.219  1.00  6.85           N  
ATOM    254  CA  SER A  65      -6.891   3.560   7.007  1.00  6.90           C  
ATOM    255  C   SER A  65      -5.558   3.929   6.453  1.00  4.72           C  
ATOM    256  O   SER A  65      -5.339   4.366   5.325  1.00  3.91           O  
ATOM    257  N   THR A  66      -4.573   3.799   7.360  1.00  4.48           N  
ATOM    258  CA  THR A  66      -3.189   4.091   7.149  1.00  3.80           C  
ATOM    259  C   THR A  66      -2.549   2.775   6.870  1.00  4.60           C  
ATOM    260  O   THR A  66      -2.635   1.799   7.613  1.00  5.33           O  
ATOM    261  N   LEU A  67      -1.817   2.687   5.745  1.00  4.17           N  
ATOM    262  CA  LEU A  67      -0.740   1.751   5.647  1.00  3.85           C  
ATOM    263  C   LEU A  67       0.602   2.379   5.808  1.00  3.80           C  
ATOM    264  O   LEU A  67       0.744   3.550   5.460  1.00  5.54           O  
ATOM    265  N   HIS A  68       1.644   1.712   6.334  1.00  2.94           N  
ATOM    266  CA  HIS A  68       2.984   2.211   6.363  1.00  4.17           C  
ATOM    267  C   HIS A  68       3.783   1.750   5.193  1.00  5.32           C  
ATOM    268  O   HIS A  68       3.758   0.539   4.980  1.00  7.70           O  
ATOM    269  N   LEU A  69       4.479   2.608   4.425  1.00  5.29           N  
ATOM    270  CA  LEU A  69       5.308   2.337   3.291  1.00  3.97           C  
ATOM    271  C   LEU A  69       6.730   2.251   3.725  1.00  5.07           C  
ATOM    272  O   LEU A  69       7.273   3.101   4.429  1.00  4.34           O  
ATOM    273  N   VAL A  70       7.342   1.114   3.350  1.00  4.29           N  
ATOM    274  CA  VAL A  70       8.715   0.839   3.638  1.00  6.26           C  
ATOM    275  C   VAL A  70       9.443   0.655   2.351  1.00  9.22           C  
ATOM    276  O   VAL A  70       8.996  -0.105   1.495  1.00  9.36           O  
TER
ENDMDL
MODEL      3
ATOM      1  N   GLN A   2     -10.725   5.810  -1.221  1.00  9.27           N  
ATOM      2  CA  GLN A   2      -9.470   6.345  -0.794  1.00  9.07           C  
ATOM      3  C   GLN A   2      -8.996   5.709   0.468  1.00  8.72           C  
ATOM      4  O   GLN A   2      -9.586   5.893   1.531  1.00  8.22           O  
ATOM      5  N   ILE A   3      -7.932   4.889   0.407  1.00  5.87           N  
ATOM      6  CA  ILE A   3      -7.248   4.514   1.605  1.00  5.07           C  
ATOM      7  C   ILE A   3      -6.041   5.337   1.896  1.00  4.01           C  
ATOM      8  O   ILE A   3      -5.610   6.014   0.964  1.00  4.61           O  
ATOM      9  N   PHE A   4      -5.589   5.493   3.154  1.00  4.55           N  
ATOM     10  CA  PHE A   4      -4.450   6.328   3.377  1.00  4.68           C  
ATOM     11  C   PHE A   4      -3.215   5.520   3.579  1.00  5.30           C  
ATOM     12  O   PHE A   4      -3.036   4.807   4.566  1.00  5.58           O  
ATOM     13  N   VAL A   5      -2.244   5.596   2.652  1.00  4.44           N  
ATOM     14  CA  VAL A   5      -1.113   4.723   2.588  1.00  3.87           C  
ATOM     15  C   VAL A   5      -0.010   5.660   2.941  1.00  4.93           C  
ATOM     16  O   VAL A   5       0.460   6.468   2.142  1.00  6.84           O  
ATOM     17  N   LYS A   6       0.318   5.624   4.245  1.00  6.04           N  
ATOM     18  CA  LYS A   6       1.146   6.603   4.879  1.00  6.12           C  
ATOM     19  C   LYS A   6       2.607   6.318   4.805  1.00  6.57           C  
ATOM     20  O   LYS A   6       3.016   5.183   5.042  1.00  5.76           O  
ATOM     21  N   THR A   7       3.426   7.270   4.325  1.00  7.41           N  
ATOM     22  CA  THR A   7       4.813   7.010   4.092  1.00  7.48           C  
ATOM     23  C   THR A   7       5.658   7.148   5.312  1.00  8.75           C  
ATOM     24  O   THR A   7       5.314   7.749   6.328  1.00  8.58           O  
ATOM     25  N   LEU A   8       6.846   6.519   5.345  1.00  9.84           N  
ATOM     26  CA  LEU A   8       7.799   6.569   6.410  1.00 14.15           C  
ATOM     27  C   LEU A   8       8.460   7.904   6.374  1.00 17.37           C  
ATOM     28  O   LEU A   8       8.987   8.390   7.374  1.00 17.01           O  
ATOM     29  N   THR A   9       8.590   8.613   5.239  1.00 18.33           N  
ATOM     30  CA  THR A   9       9.134   9.934   5.173  1.00 19.24           C  
ATOM     31  C   THR A   9       8.350  10.945   5.936  1.00 19.48           C  
ATOM     32  O   THR A   9       8.759  11.606   6.889  1.00 23.14           O  
ATOM     33  N   GLY A  10       7.070  11.130   5.566  1.00 19.43           N  
ATOM     34  CA  GLY A  10       6.178  12.068   6.173  1.00 18.74           C  
ATOM     35  C   GLY A  10       5.051  12.505   5.301  1.00 17.62           C  
ATOM     36  O   GLY A  10       4.697  13.683   5.307  1.00 19.74           O  
ATOM     37  N   LYS A  11       4.376  11.638   4.525  1.00 13.56           N  
ATOM     38  CA  LYS A  11       3.300  11.975   3.645  1.00 11.91           C  
ATOM     39  C   LYS A  11       2.307  10.872   3.778  1.00 10.18           C  
ATOM     40  O   LYS A  11       2.731   9.821   4.255  1.00  9.10           O  
ATOM     41  N   THR A  12       1.062  11.112   3.329  1.00  9.63           N  
ATOM     42  CA  THR A  12       0.030  10.124   3.280  1.00  9.85           C  
ATOM     43  C   THR A  12      -0.511  10.161   1.892  1.00 11.66           C  
ATOM     44  O   THR A  12      -0.949  11.176   1.352  1.00 12.33           O  
ATOM     45  N   ILE A  13      -0.472   9.001   1.212  1.00 10.42           N  
ATOM     46  CA  ILE A  13      -1.134   8.825  -0.043  1.00 11.84           C  
ATOM     47  C   ILE A  13      -2.579   8.480   0.078  1.00 10.55           C  
ATOM     48  O   ILE A  13      -2.986   7.464   0.640  1.00 11.92           O  
ATOM     49  N   THR A  14      -3.477   9.316  -0.473  1.00  9.39           N  
ATOM     50  CA  THR A  14      -4.836   8.915  -0.666  1.00  9.63           C  
ATOM     51  C   THR A  14      -5.083   8.093  -1.884  1.00 11.20           C  
ATOM     52  O   THR A  14      -5.306   8.692  -2.936  1.00 11.63           O  
ATOM     53  N   LEU A  15      -4.999   6.756  -1.769  1.00  8.29           N  
ATOM     54  CA  LEU A  15      -4.945   5.795  -2.827  1.00  9.03           C  
ATOM     55  C   LEU A  15      -6.330   5.315  -3.090  1.00  8.59           C  
ATOM     56  O   LEU A  15      -7.030   4.751  -2.250  1.00  7.79           O  
ATOM     57  N   GLU A  16      -6.803   5.551  -4.327  1.00 11.04           N  
ATOM     58  CA  GLU A  16      -8.033   4.964  -4.759  1.00 11.50           C  
ATOM     59  C   GLU A  16      -7.862   3.557  -5.217  1.00 10.13           C  
ATOM     60  O   GLU A  16      -7.440   3.276  -6.338  1.00  9.83           O  
ATOM     61  N   VAL A  17      -8.394   2.632  -4.397  1.00  8.99           N  
ATOM     62  CA  VAL A  17      -8.614   1.246  -4.667  1.00  8.85           C  
ATOM     63  C   VAL A  17     -10.071   0.936  -4.618  1.00  8.04           C  
ATOM     64  O   VAL A  17     -10.816   1.788  -4.136  1.00  8.99           O  
ATOM     65  N   GLU A  18     -10.519  -0.270  -5.009  1.00  7.29           N  
ATOM     66  CA  GLU A  18     -11.763  -0.877  -4.649  1.00  7.08           C  
ATOM     67  C   GLU A  18     -11.456  -1.990  -3.707  1.00  6.45           C  
ATOM     68  O   GLU A  18     -10.281  -2.326  -3.565  1.00  5.28           O  
ATOM     69  N   PRO A  19     -12.400  -2.658  -3.113  1.00  7.24           N  
ATOM     70  CA  PRO A  19     -12.208  -3.789  -2.253  1.00  7.07           C  
ATOM     71  C   PRO A  19     -11.779  -5.014  -2.984  1.00  6.65           C  
ATOM     72  O   PRO A  19     -11.572  -6.134  -2.518  1.00  6.37           O  
ATOM     73  N   SER A  20     -11.729  -4.807  -4.312  1.00  6.80           N  
ATOM     74  CA  SER A  20     -11.388  -5.753  -5.328  1.00  6.28           C  
ATOM     75  C   SER A  20      -9.920  -5.767  -5.583  1.00  8.45           C  
ATOM     76  O   SER A  20      -9.405  -6.800  -6.008  1.00  7.26           O  
ATOM     77  N   ASP A  21      -9.247  -4.640  -5.290  1.00  7.50           N  
ATOM     78  CA  ASP A  21      -7.833  -4.483  -5.442  1.00  7.70           C  
ATOM     79  C   ASP A  21      -7.048  -5.225  -4.415  1.00  7.08           C  
ATOM     80  O   ASP A  21      -7.417  -5.416  -3.258  1.00  8.11           O  
ATOM     81  N   THR A  22      -5.960  -5.836  -4.917  1.00  5.37           N  
ATOM     82  CA  THR A  22      -5.048  -6.509  -4.044  1.00  6.01           C  
ATOM     83  C   THR A  22      -3.993  -5.541  -3.633  1.00  8.01           C  
ATOM     84  O   THR A  22      -3.923  -4.391  -4.061  1.00  8.11           O  
ATOM     85  N   ILE A  23      -3.081  -6.016  -2.766  1.00  8.32           N  
ATOM     86  CA  ILE A  23      -2.053  -5.189  -2.214  1.00  9.92           C  
ATOM     87  C   ILE A  23      -0.927  -5.088  -3.185  1.00 10.01           C  
ATOM     88  O   ILE A  23      -0.158  -4.128  -3.180  1.00  8.71           O  
ATOM     89  N   GLU A  24      -0.804  -6.052  -4.115  1.00  9.54           N  
ATOM     90  CA  GLU A  24      -0.055  -5.975  -5.331  1.00 11.81           C  
ATOM     91  C   GLU A  24      -0.510  -4.912  -6.270  1.00 11.14           C  
ATOM     92  O   GLU A  24       0.265  -4.201  -6.909  1.00 10.62           O  
ATOM     93  N   ASN A  25      -1.832  -4.686  -6.369  1.00  9.43           N  
ATOM     94  CA  ASN A  25      -2.444  -3.561  -7.003  1.00 10.96           C  
ATOM     95  C   ASN A  25      -2.247  -2.253  -6.316  1.00  9.68           C  
ATOM     96  O   ASN A  25      -2.241  -1.229  -6.997  1.00  9.33           O  
ATOM     97  N   VAL A  26      -2.016  -2.198  -4.992  1.00  6.52           N  
ATOM     98  CA  VAL A  26      -1.660  -1.064  -4.197  1.00  5.53           C  
ATOM     99  C   VAL A  26      -0.321  -0.536  -4.584  1.00  4.42           C  
ATOM    100  O   VAL A  26      -0.117   0.586  -5.046  1.00  3.40           O  
ATOM    101  N   LYS A  27       0.672  -1.440  -4.511  1.00  2.64           N  
ATOM    102  CA  LYS A  27       2.027  -1.219  -4.913  1.00  4.14           C  
ATOM    103  C   LYS A  27       2.261  -0.780  -6.317  1.00  5.58           C  
ATOM    104  O   LYS A  27       3.184  -0.006  -6.567  1.00  4.11           O  
ATOM    105  N   ALA A  28       1.405  -1.171  -7.278  1.00  6.61           N  
ATOM    106  CA  ALA A  28       1.429  -0.807  -8.660  1.00  7.74           C  
ATOM    107  C   ALA A  28       1.051   0.619  -8.864  1.00  9.17           C  
ATOM    108  O   ALA A  28       1.681   1.415  -9.560  1.00 11.45           O  
ATOM    109  N   LYS A  29      -0.032   1.005  -8.167  1.00  8.96           N  
ATOM    110  CA  LYS A  29      -0.617   2.309  -8.107  1.00  7.90           C  
ATOM    111  C   LYS A  29       0.238   3.283  -7.372  1.00  6.92           C  
ATOM    112  O   LYS A  29       0.304   4.428  -7.816  1.00  6.87           O  
ATOM    113  N   ILE A  30       0.960   2.854  -6.322  1.00  4.57           N  
ATOM    114  CA  ILE A  30       2.006   3.662  -5.776  1.00  5.58           C  
ATOM    115  C   ILE A  30       3.220   3.723  -6.637  1.00  7.26           C  
ATOM    116  O   ILE A  30       3.956   4.708  -6.643  1.00  9.46           O  
ATOM    117  N   GLN A  31       3.598   2.761  -7.499  1.00  7.06           N  
ATOM    118  CA  GLN A  31       4.632   2.833  -8.484  1.00  8.67           C  
ATOM    119  C   GLN A  31       4.293   3.805  -9.562  1.00 10.90           C  
ATOM    120  O   GLN A  31       5.125   4.579 -10.033  1.00  9.63           O  
ATOM    121  N   ASP A  32       2.980   3.887  -9.842  1.00 10.93           N  
ATOM    122  CA  ASP A  32       2.307   4.829 -10.681  1.00 14.01           C  
ATOM    123  C   ASP A  32       2.275   6.228 -10.169  1.00 14.04           C  
ATOM    124  O   ASP A  32       2.818   7.118 -10.821  1.00 13.39           O  
ATOM    125  N   LYS A  33       1.704   6.428  -8.967  1.00 14.22           N  
ATOM    126  CA  LYS A  33       1.641   7.699  -8.316  1.00 14.00           C  
ATOM    127  C   LYS A  33       2.963   8.281  -7.952  1.00 12.37           C  
ATOM    128  O   LYS A  33       3.410   9.295  -8.485  1.00 12.17           O  
ATOM    129  N   GLU A  34       3.659   7.732  -6.940  1.00 10.11           N  
ATOM    130  CA  GLU A  34       4.821   8.340  -6.369  1.00 10.07           C  
ATOM    131  C   GLU A  34       6.096   7.811  -6.929  1.00  9.32           C  
ATOM    132  O   GLU A  34       7.132   8.463  -6.809  1.00 11.61           O  
ATOM    133  N   GLY A  35       6.117   6.597  -7.507  1.00  7.22           N  
ATOM    134  CA  GLY A  35       7.243   6.091  -8.229  1.00  6.29           C  
ATOM    135  C   GLY A  35       8.191   5.285  -7.409  1.00  6.93           C  
ATOM    136  O   GLY A  35       9.380   5.210  -7.716  1.00  7.41           O  
ATOM    137  N   ILE A  36       7.656   4.582  -6.395  1.00  5.86           N  
ATOM    138  CA  ILE A  36       8.450   3.676  -5.625  1.00  6.07           C  
ATOM    139  C   ILE A  36       8.222   2.319  -6.196  1.00  6.36           C  
ATOM    140  O   ILE A  36       7.039   2.000  -6.304  1.00  6.18           O  
ATOM    141  N   PRO A  37       9.223   1.580  -6.572  1.00  8.65           N  
ATOM    142  CA  PRO A  37       8.992   0.307  -7.192  1.00  9.18           C  
ATOM    143  C   PRO A  37       8.412  -0.732  -6.297  1.00  9.85           C  
ATOM    144  O   PRO A  37       8.679  -0.625  -5.101  1.00  8.51           O  
ATOM    145  N   PRO A  38       7.801  -1.793  -6.736  1.00  8.71           N  
ATOM    146  CA  PRO A  38       7.270  -2.763  -5.823  1.00  9.08           C  
ATOM    147  C   PRO A  38       8.306  -3.626  -5.189  1.00  9.28           C  
ATOM    148  O   PRO A  38       8.054  -4.322  -4.207  1.00  6.50           O  
ATOM    149  N   ASP A  39       9.568  -3.625  -5.655  1.00 11.20           N  
ATOM    150  CA  ASP A  39      10.585  -4.316  -4.924  1.00 14.96           C  
ATOM    151  C   ASP A  39      11.054  -3.563  -3.727  1.00 13.99           C  
ATOM    152  O   ASP A  39      11.865  -4.054  -2.944  1.00 13.75           O  
ATOM    153  N   GLN A  40      10.632  -2.300  -3.535  1.00 11.60           N  
ATOM    154  CA  GLN A  40      11.049  -1.555  -2.387  1.00 10.76           C  
ATOM    155  C   GLN A  40       9.899  -1.359  -1.460  1.00  8.01           C  
ATOM    156  O   GLN A  40      10.101  -1.078  -0.280  1.00  8.96           O  
ATOM    157  N   GLN A  41       8.674  -1.525  -1.990  1.00  6.52           N  
ATOM    158  CA  GLN A  41       7.478  -1.497  -1.208  1.00  3.87           C  
ATOM    159  C   GLN A  41       7.038  -2.692  -0.434  1.00  4.79           C  
ATOM    160  O   GLN A  41       6.450  -3.645  -0.944  1.00  6.34           O  
ATOM    161  N   ARG A  42       7.163  -2.572   0.899  1.00  5.73           N  
ATOM    162  CA  ARG A  42       6.412  -3.437   1.755  1.00  6.97           C  
ATOM    163  C   ARG A  42       5.269  -2.699   2.364  1.00  7.15           C  
ATOM    164  O   ARG A  42       5.293  -1.471   2.418  1.00  7.33           O  
ATOM    165  N   LEU A  43       4.158  -3.356   2.743  1.00  4.65           N  
ATOM    166  CA  LEU A  43       3.022  -2.769   3.382  1.00  3.51           C  
ATOM    167  C   LEU A  43       2.640  -3.476   4.637  1.00  5.56           C  
ATOM    168  O   LEU A  43       2.543  -4.703   4.636  1.00  4.19           O  
ATOM    169  N   ILE A  44       2.216  -2.725   5.669  1.00  4.58           N  
ATOM    170  CA  ILE A  44       1.643  -3.247   6.871  1.00  5.55           C  
ATOM    171  C   ILE A  44       0.378  -2.496   7.112  1.00  5.46           C  
ATOM    172  O   ILE A  44       0.208  -1.396   6.590  1.00  6.04           O  
ATOM    173  N   PHE A  45      -0.431  -3.085   8.011  1.00  6.75           N  
ATOM    174  CA  PHE A  45      -1.536  -2.332   8.518  1.00  4.70           C  
ATOM    175  C   PHE A  45      -1.163  -1.586   9.753  1.00  6.34           C  
ATOM    176  O   PHE A  45      -0.639  -0.475   9.702  1.00  5.45           O  
ATOM    177  N   ALA A  46      -1.288  -2.153  10.966  1.00  6.53           N  
ATOM    178  CA  ALA A  46      -0.893  -1.566  12.208  1.00  7.15           C  
ATOM    179  C   ALA A  46       0.372  -2.266  12.567  1.00  9.00           C  
ATOM    180  O   ALA A  46       1.449  -1.710  12.781  1.00 11.15           O  
ATOM    181  N   GLY A  47       0.260  -3.593  12.755  1.00  9.35           N  
ATOM    182  CA  GLY A  47       1.330  -4.522  12.952  1.00 11.68           C  
ATOM    183  C   GLY A  47       1.533  -5.603  11.947  1.00 11.14           C  
ATOM    184  O   GLY A  47       2.679  -5.991  11.728  1.00 13.93           O  
ATOM    185  N   LYS A  48       0.400  -6.128  11.447  1.00 10.47           N  
ATOM    186  CA  LYS A  48       0.362  -7.217  10.521  1.00  8.82           C  
ATOM    187  C   LYS A  48       0.812  -6.945   9.127  1.00  7.68           C  
ATOM    188  O   LYS A  48       0.359  -6.005   8.477  1.00  6.47           O  
ATOM    189  N   GLN A  49       1.726  -7.745   8.548  1.00  8.89           N  
ATOM    190  CA  GLN A  49       2.219  -7.536   7.222  1.00  7.18           C  
ATOM    191  C   GLN A  49       1.226  -7.940   6.187  1.00  8.23           C  
ATOM    192  O   GLN A  49       0.799  -9.091   6.102  1.00  9.70           O  
ATOM    193  N   LEU A  50       0.784  -6.973   5.364  1.00  6.51           N  
ATOM    194  CA  LEU A  50      -0.093  -7.304   4.284  1.00  7.41           C  
ATOM    195  C   LEU A  50       0.635  -8.024   3.202  1.00  8.27           C  
ATOM    196  O   LEU A  50       1.719  -7.683   2.729  1.00  8.34           O  
ATOM    197  N   GLU A  51       0.025  -9.132   2.747  1.00  9.43           N  
ATOM    198  CA  GLU A  51       0.566  -9.989   1.738  1.00 11.90           C  
ATOM    199  C   GLU A  51      -0.079  -9.559   0.465  1.00 11.49           C  
ATOM    200  O   GLU A  51      -1.162  -8.976   0.470  1.00  9.88           O  
ATOM    201  N   ASP A  52       0.588  -9.830  -0.671  1.00 12.71           N  
ATOM    202  CA  ASP A  52       0.374  -9.331  -1.994  1.00 16.56           C  
ATOM    203  C   ASP A  52      -0.917  -9.796  -2.574  1.00 15.83           C  
ATOM    204  O   ASP A  52      -1.747  -8.944  -2.888  1.00 17.21           O  
ATOM    205  N   GLY A  53      -1.237 -11.081  -2.808  1.00 15.00           N  
ATOM    206  CA  GLY A  53      -2.229 -11.487  -3.756  1.00 11.77           C  
ATOM    207  C   GLY A  53      -3.611 -11.616  -3.214  1.00 11.10           C  
ATOM    208  O   GLY A  53      -4.423 -12.234  -3.901  1.00 11.25           O  
ATOM    209  N   ARG A  54      -3.979 -10.976  -2.090  1.00  8.53           N  
ATOM    210  CA  ARG A  54      -5.282 -11.087  -1.510  1.00  9.05           C  
ATOM    211  C   ARG A  54      -5.933  -9.748  -1.558  1.00  8.96           C  
ATOM    212  O   ARG A  54      -5.281  -8.715  -1.697  1.00 11.60           O  
ATOM    213  N   THR A  55      -7.275  -9.650  -1.535  1.00  9.05           N  
ATOM    214  CA  THR A  55      -7.995  -8.443  -1.796  1.00  9.03           C  
ATOM    215  C   THR A  55      -8.110  -7.608  -0.568  1.00  8.15           C  
ATOM    216  O   THR A  55      -8.056  -8.069   0.571  1.00  5.91           O  
ATOM    217  N   LEU A  56      -8.450  -6.308  -0.639  1.00  6.91           N  
ATOM    218  CA  LEU A  56      -8.761  -5.530   0.520  1.00  8.29           C  
ATOM    219  C   LEU A  56     -10.082  -5.831   1.141  1.00  8.05           C  
ATOM    220  O   LEU A  56     -10.312  -5.478   2.297  1.00 10.17           O  
ATOM    221  N   SER A  57     -11.025  -6.557   0.514  1.00  8.92           N  
ATOM    222  CA  SER A  57     -12.201  -7.112   1.109  1.00  9.00           C  
ATOM    223  C   SER A  57     -11.798  -8.225   2.013  1.00  9.44           C  
ATOM    224  O   SER A  57     -12.391  -8.352   3.083  1.00 10.91           O  
ATOM    225  N   ASP A  58     -10.803  -9.038   1.614  1.00  9.11           N  
ATOM    226  CA  ASP A  58     -10.272 -10.093   2.420  1.00  7.91           C  
ATOM    227  C   ASP A  58      -9.612  -9.676   3.689  1.00  9.12           C  
ATOM    228  O   ASP A  58      -9.843 -10.245   4.754  1.00  8.61           O  
ATOM    229  N   TYR A  59      -8.848  -8.571   3.621  1.00  7.97           N  
ATOM    230  CA  TYR A  59      -8.256  -8.047   4.813  1.00  8.45           C  
ATOM    231  C   TYR A  59      -9.232  -7.259   5.616  1.00 10.98           C  
ATOM    232  O   TYR A  59      -9.099  -7.274   6.839  1.00 12.95           O  
ATOM    233  N   ASN A  60     -10.233  -6.570   5.039  1.00 12.38           N  
ATOM    234  CA  ASN A  60     -11.242  -5.708   5.572  1.00 13.94           C  
ATOM    235  C   ASN A  60     -10.564  -4.439   5.961  1.00 14.16           C  
ATOM    236  O   ASN A  60     -10.807  -3.966   7.070  1.00 14.26           O  
ATOM    237  N   ILE A  61      -9.834  -3.827   5.012  1.00 11.08           N  
ATOM    238  CA  ILE A  61      -9.252  -2.521   5.021  1.00 11.78           C  
ATOM    239  C   ILE A  61     -10.163  -1.614   4.269  1.00 13.74           C  
ATOM    240  O   ILE A  61     -10.436  -1.806   3.085  1.00 14.60           O  
ATOM    241  N   GLN A  62     -10.885  -0.727   4.977  1.00 13.97           N  
ATOM    242  CA  GLN A  62     -12.003  -0.031   4.420  1.00 15.52           C  
ATOM    243  C   GLN A  62     -11.654   1.375   4.070  1.00 13.94           C  
ATOM    244  O   GLN A  62     -10.466   1.677   3.976  1.00 12.15           O  
ATOM    245  N   LYS A  63     -12.666   2.218   3.801  1.00 11.73           N  
ATOM    246  CA  LYS A  63     -12.523   3.568   3.350  1.00 11.97           C  
ATOM    247  C   LYS A  63     -11.899   4.400   4.417  1.00 10.41           C  
ATOM    248  O   LYS A  63     -12.272   4.313   5.586  1.00  9.59           O  
ATOM    249  N   GLU A  64     -10.919   5.258   4.080  1.00 10.04           N  
ATOM    250  CA  GLU A  64     -10.267   6.106   5.029  1.00 10.94           C  
ATOM    251  C   GLU A  64      -9.464   5.399   6.066  1.00  9.74           C  
ATOM    252  O   GLU A  64      -9.416   5.776   7.236  1.00  9.42           O  
ATOM    253  N   SER A  65      -8.702   4.338   5.744  1.00  6.85           N  
ATOM    254  CA  SER A  65      -7.982   3.466   6.619  1.00  6.90           C  
ATOM    255  C   SER A  65      -6.513   3.683   6.501  1.00  4.72           C  
ATOM    256  O   SER A  65      -6.045   4.095   5.441  1.00  3.91           O  
ATOM    257  N   THR A  66      -5.727   3.473   7.572  1.00  4.48           N  
ATOM    258  CA  THR A  66      -4.342   3.816   7.674  1.00  3.80           C  
ATOM    259  C   THR A  66      -3.497   2.624   7.386  1.00  4.60           C  
ATOM    260  O   THR A  66      -3.507   1.700   8.198  1.00  5.33           O  
ATOM    261  N   LEU A  67      -2.776   2.550   6.253  1.00  4.17           N  
ATOM    262  CA  LEU A  67      -1.803   1.548   5.947  1.00  3.85           C  
ATOM    263  C   LEU A  67      -0.480   2.229   6.034  1.00  3.80           C  
ATOM    264  O   LEU A  67      -0.347   3.414   5.732  1.00  5.54           O  
ATOM    265  N   HIS A  68       0.601   1.474   6.298  1.00  2.94           N  
ATOM    266  CA  HIS A  68       1.877   2.118   6.301  1.00  4.17           C  
ATOM    267  C   HIS A  68       2.831   1.555   5.304  1.00  5.32           C  
ATOM    268  O   HIS A  68       2.881   0.356   5.033  1.00  7.70           O  
ATOM    269  N   LEU A  69       3.538   2.482   4.633  1.00  5.29           N  
ATOM    270  CA  LEU A  69       4.453   2.160   3.583  1.00  3.97           C  
ATOM    271  C   LEU A  69       5.837   1.967   4.101  1.00  5.07           C  
ATOM    272  O   LEU A  69       6.486   2.919   4.532  1.00  4.34           O  
ATOM    273  N   VAL A  70       6.391   0.742   4.109  1.00  4.29           N  
ATOM    274  CA  VAL A  70       7.690   0.369   4.579  1.00  6.26           C  
ATOM    275  C   VAL A  70       8.729   0.496   3.519  1.00  9.22           C  
ATOM    276  O   VAL A  70       8.530   0.272   2.326  1.00  9.36           O  
TER
ENDMDL
MODEL      4
ATOM      1  N   GLN A   2     -11.524   4.981  -2.046  1.00  9.27           N  
ATOM      2  CA  GLN A   2     -10.154   5.331  -1.832  1.00  9.07           C  
ATOM      3  C   GLN A   2      -9.384   4.631  -0.766  1.00  8.72           C  
ATOM      4  O   GLN A   2     -10.005   4.306   0.245  1.00  8.22           O  
ATOM      5  N   ILE A   3      -8.075   4.346  -0.889  1.00  5.87           N  
ATOM      6  CA  ILE A   3      -7.258   3.935   0.210  1.00  5.07           C  
ATOM      7  C   ILE A   3      -6.125   4.900   0.285  1.00  4.01           C  
ATOM      8  O   ILE A   3      -5.815   5.637  -0.650  1.00  4.61           O  
ATOM      9  N   PHE A   4      -5.599   4.978   1.521  1.00  4.55           N  
ATOM     10  CA  PHE A   4      -4.597   5.931   1.887  1.00  4.68           C  
ATOM     11  C   PHE A   4      -3.327   5.201   2.159  1.00  5.30           C  
ATOM     12  O   PHE A   4      -3.319   4.142   2.784  1.00  5.58           O  
ATOM     13  N   VAL A   5      -2.206   5.759   1.668  1.00  4.44           N  
ATOM     14  CA  VAL A   5      -0.928   5.176   1.933  1.00  3.87           C  
ATOM     15  C   VAL A   5       0.017   6.180   2.498  1.00  4.93           C  
ATOM     16  O   VAL A   5       0.315   7.222   1.916  1.00  6.84           O  
ATOM     17  N   LYS A   6       0.558   5.876   3.692  1.00  6.04           N  
ATOM     18  CA  LYS A   6       1.325   6.779   4.493  1.00  6.12           C  
ATOM     19  C   LYS A   6       2.796   6.571   4.377  1.00  6.57           C  
ATOM     20  O   LYS A   6       3.179   5.402   4.401  1.00  5.76           O  
ATOM     21  N   THR A   7       3.589   7.605   4.044  1.00  7.41           N  
ATOM     22  CA  THR A   7       5.017   7.552   3.994  1.00  7.48           C  
ATOM     23  C   THR A   7       5.684   7.753   5.311  1.00  8.75           C  
ATOM     24  O   THR A   7       5.018   7.996   6.316  1.00  8.58           O  
ATOM     25  N   LEU A   8       7.017   7.597   5.392  1.00  9.84           N  
ATOM     26  CA  LEU A   8       7.728   7.817   6.613  1.00 14.15           C  
ATOM     27  C   LEU A   8       7.815   9.258   6.981  1.00 17.37           C  
ATOM     28  O   LEU A   8       7.663   9.683   8.125  1.00 17.01           O  
ATOM     29  N   THR A   9       8.101  10.091   5.965  1.00 18.33           N  
ATOM     30  CA  THR A   9       8.140  11.516   6.078  1.00 19.24           C  
ATOM     31  C   THR A   9       6.767  12.035   6.330  1.00 19.48           C  
ATOM     32  O   THR A   9       6.608  13.146   6.835  1.00 23.14           O  
ATOM     33  N   GLY A  10       5.699  11.302   5.967  1.00 19.43           N  
ATOM     34  CA  GLY A  10       4.353  11.670   6.276  1.00 18.74           C  
ATOM     35  C   GLY A  10       3.314  11.952   5.246  1.00 17.62           C  
ATOM     36  O   GLY A  10       2.217  12.388   5.594  1.00 19.74           O  
ATOM     37  N   LYS A  11       3.574  11.648   3.962  1.00 13.56           N  
ATOM     38  CA  LYS A  11       2.654  12.094   2.962  1.00 11.91           C  
ATOM     39  C   LYS A  11       1.624  11.018   2.910  1.00 10.18           C  
ATOM     40  O   LYS A  11       1.907   9.838   3.109  1.00  9.10           O  
ATOM     41  N   THR A  12       0.370  11.423   2.642  1.00  9.63           N  
ATOM     42  CA  THR A  12      -0.716  10.511   2.457  1.00  9.85           C  
ATOM     43  C   THR A  12      -1.192  10.461   1.046  1.00 11.66           C  
ATOM     44  O   THR A  12      -1.772  11.413   0.528  1.00 12.33           O  
ATOM     45  N   ILE A  13      -0.808   9.359   0.377  1.00 10.42           N  
ATOM     46  CA  ILE A  13      -0.998   9.040  -1.004  1.00 11.84           C  
ATOM     47  C   ILE A  13      -2.335   8.438  -1.269  1.00 10.55           C  
ATOM     48  O   ILE A  13      -2.794   7.601  -0.492  1.00 11.92           O  
ATOM     49  N   THR A  14      -3.124   8.924  -2.244  1.00  9.39           N  
ATOM     50  CA  THR A  14      -4.454   8.446  -2.459  1.00  9.63           C  
ATOM     51  C   THR A  14      -4.579   7.582  -3.666  1.00 11.20           C  
ATOM     52  O   THR A  14      -4.326   8.097  -4.754  1.00 11.63           O  
ATOM     53  N   LEU A  15      -4.939   6.301  -3.470  1.00  8.29           N  
ATOM     54  CA  LEU A  15      -5.082   5.334  -4.514  1.00  9.03           C  
ATOM     55  C   LEU A  15      -6.506   4.896  -4.482  1.00  8.59           C  
ATOM     56  O   LEU A  15      -7.111   4.664  -3.437  1.00  7.79           O  
ATOM     57  N   GLU A  16      -7.197   4.869  -5.636  1.00 11.04           N  
ATOM     58  CA  GLU A  16      -8.557   4.452  -5.776  1.00 11.50           C  
ATOM     59  C   GLU A  16      -8.572   3.011  -6.157  1.00 10.13           C  
ATOM     60  O   GLU A  16      -7.973   2.597  -7.148  1.00  9.83           O  
ATOM     61  N   VAL A  17      -9.252   2.225  -5.303  1.00  8.99           N  
ATOM     62  CA  VAL A  17      -9.339   0.812  -5.505  1.00  8.85           C  
ATOM     63  C   VAL A  17     -10.716   0.272  -5.332  1.00  8.04           C  
ATOM     64  O   VAL A  17     -11.652   1.010  -5.029  1.00  8.99           O  
ATOM     65  N   GLU A  18     -10.946  -1.024  -5.608  1.00  7.29           N  
ATOM     66  CA  GLU A  18     -12.169  -1.726  -5.370  1.00  7.08           C  
ATOM     67  C   GLU A  18     -11.887  -2.528  -4.146  1.00  6.45           C  
ATOM     68  O   GLU A  18     -10.800  -2.408  -3.584  1.00  5.28           O  
ATOM     69  N   PRO A  19     -12.681  -3.412  -3.618  1.00  7.24           N  
ATOM     70  CA  PRO A  19     -12.330  -4.460  -2.705  1.00  7.07           C  
ATOM     71  C   PRO A  19     -11.615  -5.551  -3.425  1.00  6.65           C  
ATOM     72  O   PRO A  19     -10.901  -6.329  -2.794  1.00  6.37           O  
ATOM     73  N   SER A  20     -11.982  -5.667  -4.714  1.00  6.80           N  
ATOM     74  CA  SER A  20     -11.546  -6.652  -5.654  1.00  6.28           C  
ATOM     75  C   SER A  20     -10.129  -6.629  -6.112  1.00  8.45           C  
ATOM     76  O   SER A  20      -9.518  -7.629  -6.487  1.00  7.26           O  
ATOM     77  N   ASP A  21      -9.537  -5.421  -6.108  1.00  7.50           N  
ATOM     78  CA  ASP A  21      -8.194  -5.280  -6.578  1.00  7.70           C  
ATOM     79  C   ASP A  21      -7.188  -5.864  -5.646  1.00  7.08           C  
ATOM     80  O   ASP A  21      -7.454  -6.164  -4.484  1.00  8.11           O  
ATOM     81  N   THR A  22      -5.942  -6.138  -6.074  1.00  5.37           N  
ATOM     82  CA  THR A  22      -4.981  -6.813  -5.259  1.00  6.01           C  
ATOM     83  C   THR A  22      -3.946  -5.888  -4.718  1.00  8.01           C  
ATOM     84  O   THR A  22      -3.966  -4.691  -5.004  1.00  8.11           O  
ATOM     85  N   ILE A  23      -3.015  -6.329  -3.853  1.00  8.32           N  
ATOM     86  CA  ILE A  23      -1.959  -5.505  -3.353  1.00  9.92           C  
ATOM     87  C   ILE A  23      -1.003  -5.073  -4.411  1.00 10.01           C  
ATOM     88  O   ILE A  23      -0.441  -3.979  -4.417  1.00  8.71           O  
ATOM     89  N   GLU A  24      -0.945  -5.900  -5.470  1.00  9.54           N  
ATOM     90  CA  GLU A  24      -0.170  -5.501  -6.603  1.00 11.81           C  
ATOM     91  C   GLU A  24      -0.621  -4.301  -7.364  1.00 11.14           C  
ATOM     92  O   GLU A  24       0.205  -3.554  -7.887  1.00 10.62           O  
ATOM     93  N   ASN A  25      -1.943  -4.115  -7.526  1.00  9.43           N  
ATOM     94  CA  ASN A  25      -2.504  -2.959  -8.153  1.00 10.96           C  
ATOM     95  C   ASN A  25      -2.229  -1.679  -7.441  1.00  9.68           C  
ATOM     96  O   ASN A  25      -1.965  -0.690  -8.122  1.00  9.33           O  
ATOM     97  N   VAL A  26      -2.355  -1.673  -6.102  1.00  6.52           N  
ATOM     98  CA  VAL A  26      -2.068  -0.574  -5.234  1.00  5.53           C  
ATOM     99  C   VAL A  26      -0.670  -0.138  -5.510  1.00  4.42           C  
ATOM    100  O   VAL A  26      -0.349   1.047  -5.577  1.00  3.40           O  
ATOM    101  N   LYS A  27       0.232  -1.103  -5.763  1.00  2.64           N  
ATOM    102  CA  LYS A  27       1.621  -0.864  -6.004  1.00  4.14           C  
ATOM    103  C   LYS A  27       1.895  -0.322  -7.365  1.00  5.58           C  
ATOM    104  O   LYS A  27       2.913   0.318  -7.627  1.00  4.11           O  
ATOM    105  N   ALA A  28       1.047  -0.597  -8.371  1.00  6.61           N  
ATOM    106  CA  ALA A  28       1.206  -0.101  -9.703  1.00  7.74           C  
ATOM    107  C   ALA A  28       0.938   1.365  -9.712  1.00  9.17           C  
ATOM    108  O   ALA A  28       1.623   2.110 -10.410  1.00 11.45           O  
ATOM    109  N   LYS A  29      -0.039   1.830  -8.914  1.00  8.96           N  
ATOM    110  CA  LYS A  29      -0.552   3.153  -8.739  1.00  7.90           C  
ATOM    111  C   LYS A  29       0.361   4.076  -8.009  1.00  6.92           C  
ATOM    112  O   LYS A  29       0.615   5.203  -8.432  1.00  6.87           O  
ATOM    113  N   ILE A  30       0.987   3.596  -6.919  1.00  4.57           N  
ATOM    114  CA  ILE A  30       2.111   4.288  -6.368  1.00  5.58           C  
ATOM    115  C   ILE A  30       3.258   4.570  -7.276  1.00  7.26           C  
ATOM    116  O   ILE A  30       3.905   5.610  -7.384  1.00  9.46           O  
ATOM    117  N   GLN A  31       3.667   3.655  -8.173  1.00  7.06           N  
ATOM    118  CA  GLN A  31       4.719   3.768  -9.135  1.00  8.67           C  
ATOM    119  C   GLN A  31       4.505   4.822 -10.167  1.00 10.90           C  
ATOM    120  O   GLN A  31       5.378   5.638 -10.458  1.00  9.63           O  
ATOM    121  N   ASP A  32       3.285   4.914 -10.727  1.00 10.93           N  
ATOM    122  CA  ASP A  32       2.846   5.998 -11.550  1.00 14.01           C  
ATOM    123  C   ASP A  32       2.763   7.358 -10.946  1.00 14.04           C  
ATOM    124  O   ASP A  32       3.149   8.383 -11.506  1.00 13.39           O  
ATOM    125  N   LYS A  33       2.078   7.415  -9.790  1.00 14.22           N  
ATOM    126  CA  LYS A  33       1.769   8.591  -9.036  1.00 14.00           C  
ATOM    127  C   LYS A  33       2.934   9.280  -8.412  1.00 12.37           C  
ATOM    128  O   LYS A  33       3.265  10.414  -8.753  1.00 12.17           O  
ATOM    129  N   GLU A  34       3.698   8.537  -7.592  1.00 10.11           N  
ATOM    130  CA  GLU A  34       4.787   9.020  -6.801  1.00 10.07           C  
ATOM    131  C   GLU A  34       6.122   8.783  -7.419  1.00  9.32           C  
ATOM    132  O   GLU A  34       7.073   9.473  -7.055  1.00 11.61           O  
ATOM    133  N   GLY A  35       6.258   7.803  -8.329  1.00  7.22           N  
ATOM    134  CA  GLY A  35       7.516   7.513  -8.945  1.00  6.29           C  
ATOM    135  C   GLY A  35       8.372   6.501  -8.263  1.00  6.93           C  
ATOM    136  O   GLY A  35       9.602   6.504  -8.237  1.00  7.41           O  
ATOM    137  N   ILE A  36       7.777   5.607  -7.454  1.00  5.86           N  
ATOM    138  CA  ILE A  36       8.395   4.698  -6.539  1.00  6.07           C  
ATOM    139  C   ILE A  36       8.344   3.383  -7.239  1.00  6.36           C  
ATOM    140  O   ILE A  36       7.222   2.916  -7.431  1.00  6.18           O  
ATOM    141  N   PRO A  37       9.356   2.639  -7.572  1.00  8.65           N  
ATOM    142  CA  PRO A  37       9.164   1.324  -8.112  1.00  9.18           C  
ATOM    143  C   PRO A  37       8.579   0.300  -7.203  1.00  9.85           C  
ATOM    144  O   PRO A  37       8.813   0.486  -6.010  1.00  8.51           O  
ATOM    145  N   PRO A  38       7.856  -0.683  -7.652  1.00  8.71           N  
ATOM    146  CA  PRO A  38       7.103  -1.466  -6.716  1.00  9.08           C  
ATOM    147  C   PRO A  38       7.868  -2.587  -6.101  1.00  9.28           C  
ATOM    148  O   PRO A  38       7.329  -3.131  -5.139  1.00  6.50           O  
ATOM    149  N   ASP A  39       9.124  -2.874  -6.489  1.00 11.20           N  
ATOM    150  CA  ASP A  39      10.020  -3.727  -5.772  1.00 14.96           C  
ATOM    151  C   ASP A  39      10.462  -3.068  -4.511  1.00 13.99           C  
ATOM    152  O   ASP A  39      10.599  -3.750  -3.496  1.00 13.75           O  
ATOM    153  N   GLN A  40      10.666  -1.738  -4.511  1.00 11.60           N  
ATOM    154  CA  GLN A  40      11.091  -0.912  -3.425  1.00 10.76           C  
ATOM    155  C   GLN A  40      10.050  -0.765  -2.369  1.00  8.01           C  
ATOM    156  O   GLN A  40      10.437  -0.538  -1.223  1.00  8.96           O  
ATOM    157  N   GLN A  41       8.764  -0.861  -2.748  1.00  6.52           N  
ATOM    158  CA  GLN A  41       7.640  -0.783  -1.867  1.00  3.87           C  
ATOM    159  C   GLN A  41       7.264  -2.043  -1.166  1.00  4.79           C  
ATOM    160  O   GLN A  41       7.148  -3.154  -1.680  1.00  6.34           O  
ATOM    161  N   ARG A  42       7.102  -1.846   0.155  1.00  5.73           N  
ATOM    162  CA  ARG A  42       6.561  -2.815   1.056  1.00  6.97           C  
ATOM    163  C   ARG A  42       5.388  -2.120   1.659  1.00  7.15           C  
ATOM    164  O   ARG A  42       5.503  -0.922   1.914  1.00  7.33           O  
ATOM    165  N   LEU A  43       4.241  -2.812   1.776  1.00  4.65           N  
ATOM    166  CA  LEU A  43       3.067  -2.251   2.369  1.00  3.51           C  
ATOM    167  C   LEU A  43       2.756  -2.967   3.639  1.00  5.56           C  
ATOM    168  O   LEU A  43       2.864  -4.191   3.684  1.00  4.19           O  
ATOM    169  N   ILE A  44       2.386  -2.218   4.692  1.00  4.58           N  
ATOM    170  CA  ILE A  44       1.899  -2.906   5.848  1.00  5.55           C  
ATOM    171  C   ILE A  44       0.534  -2.433   6.212  1.00  5.46           C  
ATOM    172  O   ILE A  44       0.013  -1.515   5.581  1.00  6.04           O  
ATOM    173  N   PHE A  45      -0.154  -3.124   7.139  1.00  6.75           N  
ATOM    174  CA  PHE A  45      -1.252  -2.459   7.769  1.00  4.70           C  
ATOM    175  C   PHE A  45      -0.686  -1.685   8.909  1.00  6.34           C  
ATOM    176  O   PHE A  45      -0.367  -0.509   8.741  1.00  5.45           O  
ATOM    177  N   ALA A  46      -0.632  -2.330  10.088  1.00  6.53           N  
ATOM    178  CA  ALA A  46       0.051  -1.774  11.215  1.00  7.15           C  
ATOM    179  C   ALA A  46       1.289  -2.483  11.644  1.00  9.00           C  
ATOM    180  O   ALA A  46       2.120  -1.970  12.393  1.00 11.15           O  
ATOM    181  N   GLY A  47       1.521  -3.736  11.215  1.00  9.35           N  
ATOM    182  CA  GLY A  47       2.740  -4.453  11.428  1.00 11.68           C  
ATOM    183  C   GLY A  47       2.938  -5.666  10.586  1.00 11.14           C  
ATOM    184  O   GLY A  47       4.064  -6.012  10.235  1.00 13.93           O  
ATOM    185  N   LYS A  48       1.867  -6.394  10.221  1.00 10.47           N  
ATOM    186  CA  LYS A  48       1.800  -7.518   9.340  1.00  8.82           C  
ATOM    187  C   LYS A  48       1.877  -7.048   7.928  1.00  7.68           C  
ATOM    188  O   LYS A  48       1.406  -6.034   7.416  1.00  6.47           O  
ATOM    189  N   GLN A  49       2.700  -7.749   7.127  1.00  8.89           N  
ATOM    190  CA  GLN A  49       2.961  -7.418   5.761  1.00  7.18           C  
ATOM    191  C   GLN A  49       1.910  -7.737   4.754  1.00  8.23           C  
ATOM    192  O   GLN A  49       1.126  -8.670   4.917  1.00  9.70           O  
ATOM    193  N   LEU A  50       1.832  -6.995   3.634  1.00  6.51           N  
ATOM    194  CA  LEU A  50       0.736  -7.158   2.731  1.00  7.41           C  
ATOM    195  C   LEU A  50       1.326  -7.605   1.438  1.00  8.27           C  
ATOM    196  O   LEU A  50       2.093  -6.830   0.870  1.00  8.34           O  
ATOM    197  N   GLU A  51       0.944  -8.821   1.006  1.00  9.43           N  
ATOM    198  CA  GLU A  51       1.538  -9.395  -0.161  1.00 11.90           C  
ATOM    199  C   GLU A  51       0.647  -9.444  -1.354  1.00 11.49           C  
ATOM    200  O   GLU A  51      -0.583  -9.465  -1.350  1.00  9.88           O  
ATOM    201  N   ASP A  52       1.288  -9.396  -2.536  1.00 12.71           N  
ATOM    202  CA  ASP A  52       0.887  -9.175  -3.890  1.00 16.56           C  
ATOM    203  C   ASP A  52      -0.432  -9.777  -4.233  1.00 15.83           C  
ATOM    204  O   ASP A  52      -1.344  -8.986  -4.470  1.00 17.21           O  
ATOM    205  N   GLY A  53      -0.568 -11.112  -4.327  1.00 15.00           N  
ATOM    206  CA  GLY A  53      -1.644 -11.599  -5.134  1.00 11.77           C  
ATOM    207  C   GLY A  53      -2.922 -11.918  -4.438  1.00 11.10           C  
ATOM    208  O   GLY A  53      -3.719 -12.682  -4.981  1.00 11.25           O  
ATOM    209  N   ARG A  54      -3.191 -11.331  -3.258  1.00  8.53           N  
ATOM    210  CA  ARG A  54      -4.456 -11.379  -2.594  1.00  9.05           C  
ATOM    211  C   ARG A  54      -5.177 -10.079  -2.699  1.00  8.96           C  
ATOM    212  O   ARG A  54      -4.591  -9.010  -2.864  1.00 11.60           O  
ATOM    213  N   THR A  55      -6.503 -10.037  -2.479  1.00  9.05           N  
ATOM    214  CA  THR A  55      -7.280  -8.851  -2.666  1.00  9.03           C  
ATOM    215  C   THR A  55      -7.381  -8.035  -1.424  1.00  8.15           C  
ATOM    216  O   THR A  55      -7.060  -8.417  -0.300  1.00  5.91           O  
ATOM    217  N   LEU A  56      -7.915  -6.806  -1.543  1.00  6.91           N  
ATOM    218  CA  LEU A  56      -8.163  -5.967  -0.413  1.00  8.29           C  
ATOM    219  C   LEU A  56      -9.237  -6.476   0.486  1.00  8.05           C  
ATOM    220  O   LEU A  56      -9.164  -6.506   1.713  1.00 10.17           O  
ATOM    221  N   SER A  57     -10.314  -7.045  -0.085  1.00  8.92           N  
ATOM    222  CA  SER A  57     -11.300  -7.895   0.505  1.00  9.00           C  
ATOM    223  C   SER A  57     -10.689  -8.987   1.314  1.00  9.44           C  
ATOM    224  O   SER A  57     -11.152  -9.254   2.422  1.00 10.91           O  
ATOM    225  N   ASP A  58      -9.574  -9.609   0.890  1.00  9.11           N  
ATOM    226  CA  ASP A  58      -8.973 -10.754   1.498  1.00  7.91           C  
ATOM    227  C   ASP A  58      -8.104 -10.390   2.652  1.00  9.12           C  
ATOM    228  O   ASP A  58      -8.028 -11.163   3.606  1.00  8.61           O  
ATOM    229  N   TYR A  59      -7.426  -9.228   2.661  1.00  7.97           N  
ATOM    230  CA  TYR A  59      -6.731  -8.727   3.806  1.00  8.45           C  
ATOM    231  C   TYR A  59      -7.622  -7.895   4.663  1.00 10.98           C  
ATOM    232  O   TYR A  59      -7.277  -7.621   5.811  1.00 12.95           O  
ATOM    233  N   ASN A  60      -8.862  -7.553   4.269  1.00 12.38           N  
ATOM    234  CA  ASN A  60      -9.968  -6.996   4.984  1.00 13.94           C  
ATOM    235  C   ASN A  60      -9.763  -5.524   5.096  1.00 14.16           C  
ATOM    236  O   ASN A  60     -10.219  -4.833   6.006  1.00 14.26           O  
ATOM    237  N   ILE A  61      -9.079  -4.901   4.120  1.00 11.08           N  
ATOM    238  CA  ILE A  61      -8.763  -3.507   4.089  1.00 11.78           C  
ATOM    239  C   ILE A  61     -10.047  -2.852   3.710  1.00 13.74           C  
ATOM    240  O   ILE A  61     -10.775  -3.324   2.837  1.00 14.60           O  
ATOM    241  N   GLN A  62     -10.356  -1.801   4.490  1.00 13.97           N  
ATOM    242  CA  GLN A  62     -11.607  -1.110   4.440  1.00 15.52           C  
ATOM    243  C   GLN A  62     -11.566   0.114   3.590  1.00 13.94           C  
ATOM    244  O   GLN A  62     -10.520   0.493   3.065  1.00 12.15           O  
ATOM    245  N   LYS A  63     -12.669   0.879   3.504  1.00 11.73           N  
ATOM    246  CA  LYS A  63     -12.731   2.126   2.807  1.00 11.97           C  
ATOM    247  C   LYS A  63     -11.910   3.091   3.590  1.00 10.41           C  
ATOM    248  O   LYS A  63     -12.028   3.235   4.806  1.00  9.59           O  
ATOM    249  N   GLU A  64     -11.020   3.801   2.873  1.00 10.04           N  
ATOM    250  CA  GLU A  64     -10.195   4.849   3.388  1.00 10.94           C  
ATOM    251  C   GLU A  64      -9.461   4.322   4.573  1.00  9.74           C  
ATOM    252  O   GLU A  64      -9.535   4.857   5.678  1.00  9.42           O  
ATOM    253  N   SER A  65      -8.671   3.259   4.341  1.00  6.85           N  
ATOM    254  CA  SER A  65      -7.832   2.743   5.379  1.00  6.90           C  
ATOM    255  C   SER A  65      -6.460   3.281   5.165  1.00  4.72           C  
ATOM    256  O   SER A  65      -6.127   3.570   4.016  1.00  3.91           O  
ATOM    257  N   THR A  66      -5.717   3.512   6.262  1.00  4.48           N  
ATOM    258  CA  THR A  66      -4.366   3.972   6.176  1.00  3.80           C  
ATOM    259  C   THR A  66      -3.469   2.784   6.137  1.00  4.60           C  
ATOM    260  O   THR A  66      -3.333   2.022   7.093  1.00  5.33           O  
ATOM    261  N   LEU A  67      -2.767   2.577   5.009  1.00  4.17           N  
ATOM    262  CA  LEU A  67      -1.691   1.635   4.968  1.00  3.85           C  
ATOM    263  C   LEU A  67      -0.393   2.359   5.069  1.00  3.80           C  
ATOM    264  O   LEU A  67      -0.299   3.524   4.685  1.00  5.54           O  
ATOM    265  N   HIS A  68       0.663   1.687   5.561  1.00  2.94           N  
ATOM    266  CA  HIS A  68       1.951   2.284   5.736  1.00  4.17           C  
ATOM    267  C   HIS A  68       2.925   1.755   4.740  1.00  5.32           C  
ATOM    268  O   HIS A  68       3.231   0.572   4.606  1.00  7.70           O  
ATOM    269  N   LEU A  69       3.668   2.667   4.088  1.00  5.29           N  
ATOM    270  CA  LEU A  69       4.574   2.328   3.035  1.00  3.97           C  
ATOM    271  C   LEU A  69       5.966   2.330   3.566  1.00  5.07           C  
ATOM    272  O   LEU A  69       6.434   3.214   4.282  1.00  4.34           O  
ATOM    273  N   VAL A  70       6.627   1.194   3.281  1.00  4.29           N  
ATOM    274  CA  VAL A  70       7.876   0.839   3.880  1.00  6.26           C  
ATOM    275  C   VAL A  70       8.850   0.637   2.771  1.00  9.22           C  
ATOM    276  O   VAL A  70       8.782  -0.386   2.091  1.00  9.36           O  
TER
ENDMDL
MODEL      5
ATOM      1  N   GLN A   2     -11.163   6.074  -1.479  1.00  9.27           N  
ATOM      2  CA  GLN A   2      -9.853   6.546  -1.155  1.00  9.07           C  
ATOM      3  C   GLN A   2      -9.241   5.669  -0.118  1.00  8.72           C  
ATOM      4  O   GLN A   2      -9.924   5.342   0.851  1.00  8.22           O  
ATOM      5  N   ILE A   3      -7.947   5.307  -0.186  1.00  5.87           N  
ATOM      6  CA  ILE A   3      -7.069   4.850   0.846  1.00  5.07           C  
ATOM      7  C   ILE A   3      -5.962   5.848   0.869  1.00  4.01           C  
ATOM      8  O   ILE A   3      -5.527   6.334  -0.174  1.00  4.61           O  
ATOM      9  N   PHE A   4      -5.375   6.080   2.056  1.00  4.55           N  
ATOM     10  CA  PHE A   4      -4.251   6.938   2.270  1.00  4.68           C  
ATOM     11  C   PHE A   4      -2.966   6.193   2.390  1.00  5.30           C  
ATOM     12  O   PHE A   4      -2.770   5.460   3.358  1.00  5.58           O  
ATOM     13  N   VAL A   5      -1.937   6.369   1.542  1.00  4.44           N  
ATOM     14  CA  VAL A   5      -0.676   5.730   1.758  1.00  3.87           C  
ATOM     15  C   VAL A   5       0.373   6.693   2.196  1.00  4.93           C  
ATOM     16  O   VAL A   5       0.679   7.667   1.511  1.00  6.84           O  
ATOM     17  N   LYS A   6       0.961   6.410   3.373  1.00  6.04           N  
ATOM     18  CA  LYS A   6       1.877   7.351   3.939  1.00  6.12           C  
ATOM     19  C   LYS A   6       3.276   6.893   3.709  1.00  6.57           C  
ATOM     20  O   LYS A   6       3.519   5.694   3.583  1.00  5.76           O  
ATOM     21  N   THR A   7       4.237   7.789   3.420  1.00  7.41           N  
ATOM     22  CA  THR A   7       5.632   7.478   3.362  1.00  7.48           C  
ATOM     23  C   THR A   7       6.245   7.542   4.718  1.00  8.75           C  
ATOM     24  O   THR A   7       5.565   7.738   5.724  1.00  8.58           O  
ATOM     25  N   LEU A   8       7.537   7.203   4.873  1.00  9.84           N  
ATOM     26  CA  LEU A   8       8.249   7.147   6.112  1.00 14.15           C  
ATOM     27  C   LEU A   8       8.321   8.444   6.840  1.00 17.37           C  
ATOM     28  O   LEU A   8       8.008   8.612   8.018  1.00 17.01           O  
ATOM     29  N   THR A   9       8.727   9.508   6.124  1.00 18.33           N  
ATOM     30  CA  THR A   9       8.889  10.880   6.495  1.00 19.24           C  
ATOM     31  C   THR A   9       7.568  11.440   6.895  1.00 19.48           C  
ATOM     32  O   THR A   9       7.403  11.878   8.033  1.00 23.14           O  
ATOM     33  N   GLY A  10       6.592  11.366   5.973  1.00 19.43           N  
ATOM     34  CA  GLY A  10       5.194  11.576   6.187  1.00 18.74           C  
ATOM     35  C   GLY A  10       4.599  12.355   5.065  1.00 17.62           C  
ATOM     36  O   GLY A  10       3.859  13.310   5.294  1.00 19.74           O  
ATOM     37  N   LYS A  11       4.806  12.016   3.780  1.00 13.56           N  
ATOM     38  CA  LYS A  11       3.985  12.458   2.695  1.00 11.91           C  
ATOM     39  C   LYS A  11       2.900  11.486   2.384  1.00 10.18           C  
ATOM     40  O   LYS A  11       3.016  10.277   2.580  1.00  9.10           O  
ATOM     41  N   THR A  12       1.697  11.951   2.002  1.00  9.63           N  
ATOM     42  CA  THR A  12       0.505  11.215   1.717  1.00  9.85           C  
ATOM     43  C   THR A  12       0.148  11.185   0.270  1.00 11.66           C  
ATOM     44  O   THR A  12      -0.172  12.151  -0.421  1.00 12.33           O  
ATOM     45  N   ILE A  13       0.388   9.965  -0.241  1.00 10.42           N  
ATOM     46  CA  ILE A  13      -0.010   9.486  -1.529  1.00 11.84           C  
ATOM     47  C   ILE A  13      -1.394   8.940  -1.445  1.00 10.55           C  
ATOM     48  O   ILE A  13      -1.661   8.029  -0.662  1.00 11.92           O  
ATOM     49  N   THR A  14      -2.374   9.516  -2.163  1.00  9.39           N  
ATOM     50  CA  THR A  14      -3.702   8.988  -2.110  1.00  9.63           C  
ATOM     51  C   THR A  14      -3.966   8.192  -3.342  1.00 11.20           C  
ATOM     52  O   THR A  14      -3.655   8.676  -4.429  1.00 11.63           O  
ATOM     53  N   LEU A  15      -4.491   6.958  -3.234  1.00  8.29           N  
ATOM     54  CA  LEU A  15      -4.835   6.163  -4.371  1.00  9.03           C  
ATOM     55  C   LEU A  15      -6.275   5.797  -4.255  1.00  8.59           C  
ATOM     56  O   LEU A  15      -6.753   5.381  -3.201  1.00  7.79           O  
ATOM     57  N   GLU A  16      -7.037   5.930  -5.356  1.00 11.04           N  
ATOM     58  CA  GLU A  16      -8.461   5.807  -5.324  1.00 11.50           C  
ATOM     59  C   GLU A  16      -8.773   4.531  -6.026  1.00 10.13           C  
ATOM     60  O   GLU A  16      -8.411   4.372  -7.191  1.00  9.83           O  
ATOM     61  N   VAL A  17      -9.320   3.536  -5.305  1.00  8.99           N  
ATOM     62  CA  VAL A  17      -9.216   2.133  -5.562  1.00  8.85           C  
ATOM     63  C   VAL A  17     -10.591   1.603  -5.341  1.00  8.04           C  
ATOM     64  O   VAL A  17     -11.526   2.308  -4.965  1.00  8.99           O  
ATOM     65  N   GLU A  18     -10.754   0.289  -5.576  1.00  7.29           N  
ATOM     66  CA  GLU A  18     -11.890  -0.509  -5.232  1.00  7.08           C  
ATOM     67  C   GLU A  18     -11.465  -1.453  -4.160  1.00  6.45           C  
ATOM     68  O   GLU A  18     -10.269  -1.557  -3.894  1.00  5.28           O  
ATOM     69  N   PRO A  19     -12.298  -2.205  -3.504  1.00  7.24           N  
ATOM     70  CA  PRO A  19     -11.868  -3.095  -2.465  1.00  7.07           C  
ATOM     71  C   PRO A  19     -11.314  -4.315  -3.116  1.00  6.65           C  
ATOM     72  O   PRO A  19     -10.637  -5.097  -2.450  1.00  6.37           O  
ATOM     73  N   SER A  20     -11.567  -4.507  -4.423  1.00  6.80           N  
ATOM     74  CA  SER A  20     -11.183  -5.659  -5.177  1.00  6.28           C  
ATOM     75  C   SER A  20      -9.882  -5.552  -5.896  1.00  8.45           C  
ATOM     76  O   SER A  20      -9.461  -6.454  -6.620  1.00  7.26           O  
ATOM     77  N   ASP A  21      -9.120  -4.484  -5.603  1.00  7.50           N  
ATOM     78  CA  ASP A  21      -7.726  -4.336  -5.885  1.00  7.70           C  
ATOM     79  C   ASP A  21      -6.823  -5.011  -4.911  1.00  7.08           C  
ATOM     80  O   ASP A  21      -7.005  -4.992  -3.694  1.00  8.11           O  
ATOM     81  N   THR A  22      -5.729  -5.664  -5.343  1.00  5.37           N  
ATOM     82  CA  THR A  22      -4.773  -6.411  -4.587  1.00  6.01           C  
ATOM     83  C   THR A  22      -3.687  -5.478  -4.172  1.00  8.01           C  
ATOM     84  O   THR A  22      -3.603  -4.301  -4.520  1.00  8.11           O  
ATOM     85  N   ILE A  23      -2.777  -5.915  -3.284  1.00  8.32           N  
ATOM     86  CA  ILE A  23      -1.748  -5.071  -2.762  1.00  9.92           C  
ATOM     87  C   ILE A  23      -0.760  -4.815  -3.847  1.00 10.01           C  
ATOM     88  O   ILE A  23      -0.237  -3.704  -3.924  1.00  8.71           O  
ATOM     89  N   GLU A  24      -0.573  -5.733  -4.812  1.00  9.54           N  
ATOM     90  CA  GLU A  24       0.074  -5.595  -6.080  1.00 11.81           C  
ATOM     91  C   GLU A  24      -0.442  -4.443  -6.872  1.00 11.14           C  
ATOM     92  O   GLU A  24       0.313  -3.568  -7.292  1.00 10.62           O  
ATOM     93  N   ASN A  25      -1.777  -4.382  -7.024  1.00  9.43           N  
ATOM     94  CA  ASN A  25      -2.376  -3.233  -7.628  1.00 10.96           C  
ATOM     95  C   ASN A  25      -2.077  -1.888  -7.061  1.00  9.68           C  
ATOM     96  O   ASN A  25      -1.883  -0.931  -7.810  1.00  9.33           O  
ATOM     97  N   VAL A  26      -2.086  -1.771  -5.721  1.00  6.52           N  
ATOM     98  CA  VAL A  26      -1.919  -0.525  -5.040  1.00  5.53           C  
ATOM     99  C   VAL A  26      -0.532  -0.031  -5.264  1.00  4.42           C  
ATOM    100  O   VAL A  26      -0.387   1.143  -5.602  1.00  3.40           O  
ATOM    101  N   LYS A  27       0.506  -0.883  -5.186  1.00  2.64           N  
ATOM    102  CA  LYS A  27       1.828  -0.587  -5.645  1.00  4.14           C  
ATOM    103  C   LYS A  27       1.960  -0.220  -7.083  1.00  5.58           C  
ATOM    104  O   LYS A  27       2.797   0.627  -7.393  1.00  4.11           O  
ATOM    105  N   ALA A  28       1.193  -0.804  -8.021  1.00  6.61           N  
ATOM    106  CA  ALA A  28       1.060  -0.448  -9.400  1.00  7.74           C  
ATOM    107  C   ALA A  28       0.669   0.965  -9.669  1.00  9.17           C  
ATOM    108  O   ALA A  28       1.215   1.530 -10.615  1.00 11.45           O  
ATOM    109  N   LYS A  29      -0.192   1.500  -8.784  1.00  8.96           N  
ATOM    110  CA  LYS A  29      -0.558   2.879  -8.867  1.00  7.90           C  
ATOM    111  C   LYS A  29       0.503   3.713  -8.234  1.00  6.92           C  
ATOM    112  O   LYS A  29       0.677   4.857  -8.652  1.00  6.87           O  
ATOM    113  N   ILE A  30       1.251   3.240  -7.221  1.00  4.57           N  
ATOM    114  CA  ILE A  30       2.364   4.008  -6.755  1.00  5.58           C  
ATOM    115  C   ILE A  30       3.484   4.185  -7.721  1.00  7.26           C  
ATOM    116  O   ILE A  30       4.009   5.279  -7.922  1.00  9.46           O  
ATOM    117  N   GLN A  31       3.793   3.052  -8.378  1.00  7.06           N  
ATOM    118  CA  GLN A  31       4.648   3.011  -9.523  1.00  8.67           C  
ATOM    119  C   GLN A  31       4.246   3.926 -10.628  1.00 10.90           C  
ATOM    120  O   GLN A  31       5.176   4.472 -11.219  1.00  9.63           O  
ATOM    121  N   ASP A  32       2.961   4.116 -10.974  1.00 10.93           N  
ATOM    122  CA  ASP A  32       2.647   5.244 -11.795  1.00 14.01           C  
ATOM    123  C   ASP A  32       2.816   6.572 -11.139  1.00 14.04           C  
ATOM    124  O   ASP A  32       3.562   7.390 -11.675  1.00 13.39           O  
ATOM    125  N   LYS A  33       2.213   6.831  -9.965  1.00 14.22           N  
ATOM    126  CA  LYS A  33       2.161   8.147  -9.409  1.00 14.00           C  
ATOM    127  C   LYS A  33       3.418   8.849  -9.027  1.00 12.37           C  
ATOM    128  O   LYS A  33       3.664  10.025  -9.294  1.00 12.17           O  
ATOM    129  N   GLU A  34       4.340   8.124  -8.369  1.00 10.11           N  
ATOM    130  CA  GLU A  34       5.556   8.598  -7.783  1.00 10.07           C  
ATOM    131  C   GLU A  34       6.687   8.289  -8.703  1.00  9.32           C  
ATOM    132  O   GLU A  34       7.599   9.085  -8.922  1.00 11.61           O  
ATOM    133  N   GLY A  35       6.475   7.179  -9.432  1.00  7.22           N  
ATOM    134  CA  GLY A  35       7.458   6.636 -10.317  1.00  6.29           C  
ATOM    135  C   GLY A  35       8.416   5.783  -9.560  1.00  6.93           C  
ATOM    136  O   GLY A  35       9.605   5.765  -9.874  1.00  7.41           O  
ATOM    137  N   ILE A  36       8.006   5.003  -8.544  1.00  5.86           N  
ATOM    138  CA  ILE A  36       8.817   4.080  -7.812  1.00  6.07           C  
ATOM    139  C   ILE A  36       8.575   2.672  -8.233  1.00  6.36           C  
ATOM    140  O   ILE A  36       7.420   2.260  -8.330  1.00  6.18           O  
ATOM    141  N   PRO A  37       9.522   1.849  -8.574  1.00  8.65           N  
ATOM    142  CA  PRO A  37       9.317   0.503  -9.024  1.00  9.18           C  
ATOM    143  C   PRO A  37       8.799  -0.299  -7.880  1.00  9.85           C  
ATOM    144  O   PRO A  37       9.089   0.043  -6.735  1.00  8.51           O  
ATOM    145  N   PRO A  38       7.953  -1.282  -7.968  1.00  8.71           N  
ATOM    146  CA  PRO A  38       7.217  -1.895  -6.900  1.00  9.08           C  
ATOM    147  C   PRO A  38       7.986  -2.904  -6.118  1.00  9.28           C  
ATOM    148  O   PRO A  38       7.520  -3.528  -5.167  1.00  6.50           O  
ATOM    149  N   ASP A  39       9.272  -3.085  -6.467  1.00 11.20           N  
ATOM    150  CA  ASP A  39      10.174  -4.015  -5.863  1.00 14.96           C  
ATOM    151  C   ASP A  39      10.916  -3.298  -4.788  1.00 13.99           C  
ATOM    152  O   ASP A  39      11.114  -3.792  -3.679  1.00 13.75           O  
ATOM    153  N   GLN A  40      11.443  -2.098  -5.090  1.00 11.60           N  
ATOM    154  CA  GLN A  40      11.858  -1.149  -4.103  1.00 10.76           C  
ATOM    155  C   GLN A  40      10.851  -0.812  -3.058  1.00  8.01           C  
ATOM    156  O   GLN A  40      11.214  -0.578  -1.906  1.00  8.96           O  
ATOM    157  N   GLN A  41       9.541  -0.873  -3.355  1.00  6.52           N  
ATOM    158  CA  GLN A  41       8.417  -0.684  -2.491  1.00  3.87           C  
ATOM    159  C   GLN A  41       8.144  -1.763  -1.501  1.00  4.79           C  
ATOM    160  O   GLN A  41       8.030  -2.919  -1.908  1.00  6.34           O  
ATOM    161  N   ARG A  42       7.833  -1.443  -0.232  1.00  5.73           N  
ATOM    162  CA  ARG A  42       7.197  -2.340   0.682  1.00  6.97           C  
ATOM    163  C   ARG A  42       5.892  -1.725   1.053  1.00  7.15           C  
ATOM    164  O   ARG A  42       5.896  -0.802   1.866  1.00  7.33           O  
ATOM    165  N   LEU A  43       4.699  -2.153   0.604  1.00  4.65           N  
ATOM    166  CA  LEU A  43       3.473  -1.516   0.971  1.00  3.51           C  
ATOM    167  C   LEU A  43       2.857  -2.382   2.016  1.00  5.56           C  
ATOM    168  O   LEU A  43       2.609  -3.557   1.748  1.00  4.19           O  
ATOM    169  N   ILE A  44       2.601  -1.877   3.236  1.00  4.58           N  
ATOM    170  CA  ILE A  44       2.127  -2.626   4.358  1.00  5.55           C  
ATOM    171  C   ILE A  44       0.913  -1.929   4.870  1.00  5.46           C  
ATOM    172  O   ILE A  44       0.626  -0.787   4.518  1.00  6.04           O  
ATOM    173  N   PHE A  45       0.203  -2.577   5.811  1.00  6.75           N  
ATOM    174  CA  PHE A  45      -0.857  -2.024   6.595  1.00  4.70           C  
ATOM    175  C   PHE A  45      -0.414  -1.548   7.936  1.00  6.34           C  
ATOM    176  O   PHE A  45      -0.776  -0.436   8.318  1.00  5.45           O  
ATOM    177  N   ALA A  46       0.221  -2.391   8.769  1.00  6.53           N  
ATOM    178  CA  ALA A  46       0.688  -2.056  10.078  1.00  7.15           C  
ATOM    179  C   ALA A  46       2.054  -2.571  10.378  1.00  9.00           C  
ATOM    180  O   ALA A  46       3.048  -1.847  10.357  1.00 11.15           O  
ATOM    181  N   GLY A  47       2.155  -3.860  10.748  1.00  9.35           N  
ATOM    182  CA  GLY A  47       3.416  -4.442  11.089  1.00 11.68           C  
ATOM    183  C   GLY A  47       3.760  -5.700  10.368  1.00 11.14           C  
ATOM    184  O   GLY A  47       4.854  -6.235  10.535  1.00 13.93           O  
ATOM    185  N   LYS A  48       2.773  -6.306   9.683  1.00 10.47           N  
ATOM    186  CA  LYS A  48       3.088  -7.545   9.041  1.00  8.82           C  
ATOM    187  C   LYS A  48       3.423  -7.402   7.597  1.00  7.68           C  
ATOM    188  O   LYS A  48       2.623  -6.728   6.950  1.00  6.47           O  
ATOM    189  N   GLN A  49       4.584  -7.872   7.106  1.00  8.89           N  
ATOM    190  CA  GLN A  49       4.833  -7.877   5.698  1.00  7.18           C  
ATOM    191  C   GLN A  49       3.733  -8.536   4.940  1.00  8.23           C  
ATOM    192  O   GLN A  49       3.561  -9.747   5.077  1.00  9.70           O  
ATOM    193  N   LEU A  50       3.054  -7.819   4.027  1.00  6.51           N  
ATOM    194  CA  LEU A  50       1.929  -8.230   3.246  1.00  7.41           C  
ATOM    195  C   LEU A  50       2.279  -9.022   2.033  1.00  8.27           C  
ATOM    196  O   LEU A  50       3.285  -8.872   1.340  1.00  8.34           O  
ATOM    197  N   GLU A  51       1.387 -10.000   1.799  1.00  9.43           N  
ATOM    198  CA  GLU A  51       1.340 -10.919   0.704  1.00 11.90           C  
ATOM    199  C   GLU A  51       0.719 -10.205  -0.447  1.00 11.49           C  
ATOM    200  O   GLU A  51      -0.379  -9.665  -0.320  1.00  9.88           O  
ATOM    201  N   ASP A  52       1.388 -10.147  -1.613  1.00 12.71           N  
ATOM    202  CA  ASP A  52       0.936  -9.446  -2.774  1.00 16.56           C  
ATOM    203  C   ASP A  52      -0.483  -9.587  -3.205  1.00 15.83           C  
ATOM    204  O   ASP A  52      -1.204  -8.599  -3.338  1.00 17.21           O  
ATOM    205  N   GLY A  53      -0.887 -10.850  -3.427  1.00 15.00           N  
ATOM    206  CA  GLY A  53      -1.999 -11.157  -4.272  1.00 11.77           C  
ATOM    207  C   GLY A  53      -3.346 -11.146  -3.634  1.00 11.10           C  
ATOM    208  O   GLY A  53      -4.294 -11.516  -4.324  1.00 11.25           O  
ATOM    209  N   ARG A  54      -3.456 -10.641  -2.392  1.00  8.53           N  
ATOM    210  CA  ARG A  54      -4.710 -10.673  -1.705  1.00  9.05           C  
ATOM    211  C   ARG A  54      -5.366  -9.341  -1.837  1.00  8.96           C  
ATOM    212  O   ARG A  54      -4.692  -8.313  -1.867  1.00 11.60           O  
ATOM    213  N   THR A  55      -6.709  -9.274  -1.797  1.00  9.05           N  
ATOM    214  CA  THR A  55      -7.456  -8.061  -1.915  1.00  9.03           C  
ATOM    215  C   THR A  55      -7.573  -7.225  -0.687  1.00  8.15           C  
ATOM    216  O   THR A  55      -7.377  -7.648   0.452  1.00  5.91           O  
ATOM    217  N   LEU A  56      -7.926  -5.945  -0.899  1.00  6.91           N  
ATOM    218  CA  LEU A  56      -7.912  -4.981   0.158  1.00  8.29           C  
ATOM    219  C   LEU A  56      -9.131  -5.298   0.954  1.00  8.05           C  
ATOM    220  O   LEU A  56      -9.115  -5.065   2.162  1.00 10.17           O  
ATOM    221  N   SER A  57     -10.154  -5.832   0.263  1.00  8.92           N  
ATOM    222  CA  SER A  57     -11.356  -6.306   0.876  1.00  9.00           C  
ATOM    223  C   SER A  57     -11.117  -7.417   1.840  1.00  9.44           C  
ATOM    224  O   SER A  57     -11.610  -7.417   2.967  1.00 10.91           O  
ATOM    225  N   ASP A  58     -10.320  -8.432   1.461  1.00  9.11           N  
ATOM    226  CA  ASP A  58      -9.924  -9.583   2.211  1.00  7.91           C  
ATOM    227  C   ASP A  58      -9.225  -9.190   3.467  1.00  9.12           C  
ATOM    228  O   ASP A  58      -9.554  -9.641   4.563  1.00  8.61           O  
ATOM    229  N   TYR A  59      -8.241  -8.273   3.443  1.00  7.97           N  
ATOM    230  CA  TYR A  59      -7.443  -7.715   4.490  1.00  8.45           C  
ATOM    231  C   TYR A  59      -8.217  -6.964   5.518  1.00 10.98           C  
ATOM    232  O   TYR A  59      -7.890  -7.062   6.700  1.00 12.95           O  
ATOM    233  N   ASN A  60      -9.290  -6.305   5.046  1.00 12.38           N  
ATOM    234  CA  ASN A  60     -10.189  -5.510   5.824  1.00 13.94           C  
ATOM    235  C   ASN A  60      -9.809  -4.070   5.864  1.00 14.16           C  
ATOM    236  O   ASN A  60     -10.184  -3.398   6.824  1.00 14.26           O  
ATOM    237  N   ILE A  61      -9.154  -3.505   4.835  1.00 11.08           N  
ATOM    238  CA  ILE A  61      -8.712  -2.149   4.722  1.00 11.78           C  
ATOM    239  C   ILE A  61      -9.763  -1.283   4.118  1.00 13.74           C  
ATOM    240  O   ILE A  61     -10.180  -1.417   2.968  1.00 14.60           O  
ATOM    241  N   GLN A  62     -10.411  -0.384   4.880  1.00 13.97           N  
ATOM    242  CA  GLN A  62     -11.575   0.355   4.501  1.00 15.52           C  
ATOM    243  C   GLN A  62     -11.303   1.637   3.790  1.00 13.94           C  
ATOM    244  O   GLN A  62     -10.137   2.002   3.645  1.00 12.15           O  
ATOM    245  N   LYS A  63     -12.334   2.397   3.379  1.00 11.73           N  
ATOM    246  CA  LYS A  63     -12.232   3.746   2.915  1.00 11.97           C  
ATOM    247  C   LYS A  63     -11.742   4.722   3.928  1.00 10.41           C  
ATOM    248  O   LYS A  63     -12.167   4.863   5.073  1.00  9.59           O  
ATOM    249  N   GLU A  64     -10.682   5.462   3.556  1.00 10.04           N  
ATOM    250  CA  GLU A  64      -9.961   6.461   4.282  1.00 10.94           C  
ATOM    251  C   GLU A  64      -9.081   5.824   5.301  1.00  9.74           C  
ATOM    252  O   GLU A  64      -9.064   6.200   6.472  1.00  9.42           O  
ATOM    253  N   SER A  65      -8.403   4.731   4.908  1.00  6.85           N  
ATOM    254  CA  SER A  65      -7.601   3.881   5.732  1.00  6.90           C  
ATOM    255  C   SER A  65      -6.175   4.087   5.354  1.00  4.72           C  
ATOM    256  O   SER A  65      -5.826   4.355   4.205  1.00  3.91           O  
ATOM    257  N   THR A  66      -5.309   4.074   6.383  1.00  4.48           N  
ATOM    258  CA  THR A  66      -3.911   4.293   6.176  1.00  3.80           C  
ATOM    259  C   THR A  66      -3.083   3.080   5.929  1.00  4.60           C  
ATOM    260  O   THR A  66      -3.118   2.165   6.750  1.00  5.33           O  
ATOM    261  N   LEU A  67      -2.278   3.104   4.852  1.00  4.17           N  
ATOM    262  CA  LEU A  67      -1.265   2.124   4.607  1.00  3.85           C  
ATOM    263  C   LEU A  67       0.050   2.807   4.761  1.00  3.80           C  
ATOM    264  O   LEU A  67       0.118   4.034   4.807  1.00  5.54           O  
ATOM    265  N   HIS A  68       1.187   2.089   4.748  1.00  2.94           N  
ATOM    266  CA  HIS A  68       2.460   2.679   5.027  1.00  4.17           C  
ATOM    267  C   HIS A  68       3.380   2.139   3.986  1.00  5.32           C  
ATOM    268  O   HIS A  68       3.539   0.951   3.709  1.00  7.70           O  
ATOM    269  N   LEU A  69       4.065   3.077   3.308  1.00  5.29           N  
ATOM    270  CA  LEU A  69       5.041   2.672   2.345  1.00  3.97           C  
ATOM    271  C   LEU A  69       6.381   2.703   2.996  1.00  5.07           C  
ATOM    272  O   LEU A  69       6.895   3.695   3.512  1.00  4.34           O  
ATOM    273  N   VAL A  70       7.015   1.526   3.145  1.00  4.29           N  
ATOM    274  CA  VAL A  70       8.379   1.484   3.574  1.00  6.26           C  
ATOM    275  C   VAL A  70       9.090   1.250   2.285  1.00  9.22           C  
ATOM    276  O   VAL A  70       8.585   0.580   1.386  1.00  9.36           O  
TER
ENDMDL
MODEL      6
ATOM      1  N   GLN A   2     -11.893   3.712  -3.043  1.00  9.27           N  
ATOM      2  CA  GLN A   2     -10.728   4.394  -2.570  1.00  9.07           C  
ATOM      3  C   GLN A   2     -10.140   3.888  -1.298  1.00  8.72           C  
ATOM      4  O   GLN A   2     -10.803   3.629  -0.295  1.00  8.22           O  
ATOM      5  N   ILE A   3      -8.803   3.754  -1.358  1.00  5.87           N  
ATOM      6  CA  ILE A   3      -7.998   3.562  -0.192  1.00  5.07           C  
ATOM      7  C   ILE A   3      -6.950   4.619  -0.141  1.00  4.01           C  
ATOM      8  O   ILE A   3      -6.489   5.085  -1.182  1.00  4.61           O  
ATOM      9  N   PHE A   4      -6.521   5.025   1.067  1.00  4.55           N  
ATOM     10  CA  PHE A   4      -5.605   6.098   1.300  1.00  4.68           C  
ATOM     11  C   PHE A   4      -4.339   5.380   1.619  1.00  5.30           C  
ATOM     12  O   PHE A   4      -4.352   4.473   2.449  1.00  5.58           O  
ATOM     13  N   VAL A   5      -3.201   5.766   1.015  1.00  4.44           N  
ATOM     14  CA  VAL A   5      -1.888   5.269   1.289  1.00  3.87           C  
ATOM     15  C   VAL A   5      -1.068   6.437   1.717  1.00  4.93           C  
ATOM     16  O   VAL A   5      -0.746   7.311   0.914  1.00  6.84           O  
ATOM     17  N   LYS A   6      -0.700   6.517   3.009  1.00  6.04           N  
ATOM     18  CA  LYS A   6       0.103   7.579   3.531  1.00  6.12           C  
ATOM     19  C   LYS A   6       1.526   7.139   3.545  1.00  6.57           C  
ATOM     20  O   LYS A   6       1.960   6.047   3.906  1.00  5.76           O  
ATOM     21  N   THR A   7       2.409   8.016   3.034  1.00  7.41           N  
ATOM     22  CA  THR A   7       3.811   7.764   2.905  1.00  7.48           C  
ATOM     23  C   THR A   7       4.622   8.198   4.077  1.00  8.75           C  
ATOM     24  O   THR A   7       4.151   8.710   5.092  1.00  8.58           O  
ATOM     25  N   LEU A   8       5.927   7.886   3.999  1.00  9.84           N  
ATOM     26  CA  LEU A   8       6.819   8.234   5.061  1.00 14.15           C  
ATOM     27  C   LEU A   8       7.176   9.680   5.096  1.00 17.37           C  
ATOM     28  O   LEU A   8       7.556  10.169   6.159  1.00 17.01           O  
ATOM     29  N   THR A   9       7.179  10.410   3.966  1.00 18.33           N  
ATOM     30  CA  THR A   9       7.487  11.805   3.914  1.00 19.24           C  
ATOM     31  C   THR A   9       6.248  12.562   4.248  1.00 19.48           C  
ATOM     32  O   THR A   9       6.358  13.682   4.743  1.00 23.14           O  
ATOM     33  N   GLY A  10       5.013  12.057   4.076  1.00 19.43           N  
ATOM     34  CA  GLY A  10       3.853  12.582   4.727  1.00 18.74           C  
ATOM     35  C   GLY A  10       2.876  12.975   3.673  1.00 17.62           C  
ATOM     36  O   GLY A  10       2.397  14.099   3.528  1.00 19.74           O  
ATOM     37  N   LYS A  11       2.554  12.065   2.737  1.00 13.56           N  
ATOM     38  CA  LYS A  11       1.706  12.372   1.627  1.00 11.91           C  
ATOM     39  C   LYS A  11       0.711  11.262   1.624  1.00 10.18           C  
ATOM     40  O   LYS A  11       1.041  10.086   1.769  1.00  9.10           O  
ATOM     41  N   THR A  12      -0.542  11.715   1.444  1.00  9.63           N  
ATOM     42  CA  THR A  12      -1.705  10.885   1.392  1.00  9.85           C  
ATOM     43  C   THR A  12      -2.169  10.818  -0.023  1.00 11.66           C  
ATOM     44  O   THR A  12      -2.733  11.727  -0.630  1.00 12.33           O  
ATOM     45  N   ILE A  13      -1.944   9.639  -0.629  1.00 10.42           N  
ATOM     46  CA  ILE A  13      -2.285   9.245  -1.961  1.00 11.84           C  
ATOM     47  C   ILE A  13      -3.540   8.442  -1.958  1.00 10.55           C  
ATOM     48  O   ILE A  13      -3.783   7.566  -1.130  1.00 11.92           O  
ATOM     49  N   THR A  14      -4.454   8.797  -2.879  1.00  9.39           N  
ATOM     50  CA  THR A  14      -5.678   8.088  -3.088  1.00  9.63           C  
ATOM     51  C   THR A  14      -5.481   7.179  -4.251  1.00 11.20           C  
ATOM     52  O   THR A  14      -5.239   7.607  -5.379  1.00 11.63           O  
ATOM     53  N   LEU A  15      -5.483   5.852  -4.033  1.00  8.29           N  
ATOM     54  CA  LEU A  15      -5.468   4.870  -5.073  1.00  9.03           C  
ATOM     55  C   LEU A  15      -6.855   4.343  -5.206  1.00  8.59           C  
ATOM     56  O   LEU A  15      -7.808   4.657  -4.493  1.00  7.79           O  
ATOM     57  N   GLU A  16      -7.170   3.648  -6.313  1.00 11.04           N  
ATOM     58  CA  GLU A  16      -8.486   3.174  -6.613  1.00 11.50           C  
ATOM     59  C   GLU A  16      -8.257   1.719  -6.835  1.00 10.13           C  
ATOM     60  O   GLU A  16      -7.665   1.260  -7.810  1.00  9.83           O  
ATOM     61  N   VAL A  17      -8.685   0.908  -5.851  1.00  8.99           N  
ATOM     62  CA  VAL A  17      -8.650  -0.511  -6.026  1.00  8.85           C  
ATOM     63  C   VAL A  17     -10.038  -1.035  -6.165  1.00  8.04           C  
ATOM     64  O   VAL A  17     -11.043  -0.355  -5.962  1.00  8.99           O  
ATOM     65  N   GLU A  18     -10.148  -2.350  -6.427  1.00  7.29           N  
ATOM     66  CA  GLU A  18     -11.284  -3.208  -6.294  1.00  7.08           C  
ATOM     67  C   GLU A  18     -10.919  -4.205  -5.249  1.00  6.45           C  
ATOM     68  O   GLU A  18      -9.746  -4.548  -5.392  1.00  5.28           O  
ATOM     69  N   PRO A  19     -11.638  -4.764  -4.320  1.00  7.24           N  
ATOM     70  CA  PRO A  19     -11.183  -5.774  -3.410  1.00  7.07           C  
ATOM     71  C   PRO A  19     -10.692  -7.057  -3.987  1.00  6.65           C  
ATOM     72  O   PRO A  19      -9.972  -7.769  -3.288  1.00  6.37           O  
ATOM     73  N   SER A  20     -10.935  -7.242  -5.297  1.00  6.80           N  
ATOM     74  CA  SER A  20     -10.421  -8.280  -6.134  1.00  6.28           C  
ATOM     75  C   SER A  20      -8.988  -8.161  -6.524  1.00  8.45           C  
ATOM     76  O   SER A  20      -8.351  -9.181  -6.786  1.00  7.26           O  
ATOM     77  N   ASP A  21      -8.459  -6.931  -6.394  1.00  7.50           N  
ATOM     78  CA  ASP A  21      -7.105  -6.536  -6.627  1.00  7.70           C  
ATOM     79  C   ASP A  21      -6.210  -7.029  -5.543  1.00  7.08           C  
ATOM     80  O   ASP A  21      -6.657  -7.417  -4.464  1.00  8.11           O  
ATOM     81  N   THR A  22      -4.923  -7.149  -5.915  1.00  5.37           N  
ATOM     82  CA  THR A  22      -3.919  -7.616  -5.011  1.00  6.01           C  
ATOM     83  C   THR A  22      -2.966  -6.574  -4.532  1.00  8.01           C  
ATOM     84  O   THR A  22      -2.914  -5.492  -5.114  1.00  8.11           O  
ATOM     85  N   ILE A  23      -2.197  -6.796  -3.451  1.00  8.32           N  
ATOM     86  CA  ILE A  23      -1.267  -5.855  -2.907  1.00  9.92           C  
ATOM     87  C   ILE A  23      -0.192  -5.571  -3.899  1.00 10.01           C  
ATOM     88  O   ILE A  23       0.284  -4.440  -3.820  1.00  8.71           O  
ATOM     89  N   GLU A  24       0.120  -6.488  -4.832  1.00  9.54           N  
ATOM     90  CA  GLU A  24       0.996  -6.278  -5.942  1.00 11.81           C  
ATOM     91  C   GLU A  24       0.451  -5.173  -6.781  1.00 11.14           C  
ATOM     92  O   GLU A  24       1.230  -4.343  -7.247  1.00 10.62           O  
ATOM     93  N   ASN A  25      -0.846  -5.077  -7.122  1.00  9.43           N  
ATOM     94  CA  ASN A  25      -1.419  -4.081  -7.973  1.00 10.96           C  
ATOM     95  C   ASN A  25      -1.299  -2.717  -7.386  1.00  9.68           C  
ATOM     96  O   ASN A  25      -0.874  -1.814  -8.105  1.00  9.33           O  
ATOM     97  N   VAL A  26      -1.633  -2.484  -6.104  1.00  6.52           N  
ATOM     98  CA  VAL A  26      -1.417  -1.242  -5.429  1.00  5.53           C  
ATOM     99  C   VAL A  26       0.021  -0.857  -5.359  1.00  4.42           C  
ATOM    100  O   VAL A  26       0.361   0.308  -5.559  1.00  3.40           O  
ATOM    101  N   LYS A  27       0.954  -1.776  -5.050  1.00  2.64           N  
ATOM    102  CA  LYS A  27       2.367  -1.578  -5.140  1.00  4.14           C  
ATOM    103  C   LYS A  27       2.861  -1.236  -6.503  1.00  5.58           C  
ATOM    104  O   LYS A  27       3.775  -0.415  -6.548  1.00  4.11           O  
ATOM    105  N   ALA A  28       2.257  -1.717  -7.604  1.00  6.61           N  
ATOM    106  CA  ALA A  28       2.537  -1.269  -8.933  1.00  7.74           C  
ATOM    107  C   ALA A  28       2.161   0.163  -9.101  1.00  9.17           C  
ATOM    108  O   ALA A  28       2.999   0.935  -9.564  1.00 11.45           O  
ATOM    109  N   LYS A  29       0.915   0.491  -8.714  1.00  8.96           N  
ATOM    110  CA  LYS A  29       0.461   1.845  -8.783  1.00  7.90           C  
ATOM    111  C   LYS A  29       1.202   2.848  -7.968  1.00  6.92           C  
ATOM    112  O   LYS A  29       1.407   3.953  -8.467  1.00  6.87           O  
ATOM    113  N   ILE A  30       1.654   2.430  -6.772  1.00  4.57           N  
ATOM    114  CA  ILE A  30       2.476   3.239  -5.926  1.00  5.58           C  
ATOM    115  C   ILE A  30       3.843   3.411  -6.494  1.00  7.26           C  
ATOM    116  O   ILE A  30       4.487   4.459  -6.470  1.00  9.46           O  
ATOM    117  N   GLN A  31       4.519   2.423  -7.107  1.00  7.06           N  
ATOM    118  CA  GLN A  31       5.721   2.575  -7.866  1.00  8.67           C  
ATOM    119  C   GLN A  31       5.583   3.490  -9.033  1.00 10.90           C  
ATOM    120  O   GLN A  31       6.471   4.288  -9.331  1.00  9.63           O  
ATOM    121  N   ASP A  32       4.463   3.543  -9.775  1.00 10.93           N  
ATOM    122  CA  ASP A  32       4.387   4.505 -10.831  1.00 14.01           C  
ATOM    123  C   ASP A  32       4.162   5.863 -10.260  1.00 14.04           C  
ATOM    124  O   ASP A  32       4.550   6.848 -10.887  1.00 13.39           O  
ATOM    125  N   LYS A  33       3.489   6.007  -9.105  1.00 14.22           N  
ATOM    126  CA  LYS A  33       3.397   7.331  -8.574  1.00 14.00           C  
ATOM    127  C   LYS A  33       4.604   7.900  -7.910  1.00 12.37           C  
ATOM    128  O   LYS A  33       5.042   9.028  -8.129  1.00 12.17           O  
ATOM    129  N   GLU A  34       5.201   7.078  -7.029  1.00 10.11           N  
ATOM    130  CA  GLU A  34       6.264   7.540  -6.191  1.00 10.07           C  
ATOM    131  C   GLU A  34       7.616   7.152  -6.682  1.00  9.32           C  
ATOM    132  O   GLU A  34       8.615   7.819  -6.416  1.00 11.61           O  
ATOM    133  N   GLY A  35       7.804   6.053  -7.434  1.00  7.22           N  
ATOM    134  CA  GLY A  35       9.040   5.670  -8.045  1.00  6.29           C  
ATOM    135  C   GLY A  35       9.850   4.626  -7.358  1.00  6.93           C  
ATOM    136  O   GLY A  35      10.962   4.344  -7.801  1.00  7.41           O  
ATOM    137  N   ILE A  36       9.367   3.982  -6.280  1.00  5.86           N  
ATOM    138  CA  ILE A  36      10.187   3.154  -5.451  1.00  6.07           C  
ATOM    139  C   ILE A  36       9.936   1.752  -5.886  1.00  6.36           C  
ATOM    140  O   ILE A  36       8.771   1.407  -6.080  1.00  6.18           O  
ATOM    141  N   PRO A  37      10.872   0.863  -6.042  1.00  8.65           N  
ATOM    142  CA  PRO A  37      10.578  -0.504  -6.359  1.00  9.18           C  
ATOM    143  C   PRO A  37       9.854  -1.340  -5.360  1.00  9.85           C  
ATOM    144  O   PRO A  37       9.934  -1.003  -4.180  1.00  8.51           O  
ATOM    145  N   PRO A  38       9.117  -2.378  -5.624  1.00  8.71           N  
ATOM    146  CA  PRO A  38       8.068  -2.815  -4.749  1.00  9.08           C  
ATOM    147  C   PRO A  38       8.673  -3.753  -3.762  1.00  9.28           C  
ATOM    148  O   PRO A  38       8.000  -4.193  -2.831  1.00  6.50           O  
ATOM    149  N   ASP A  39       9.944  -4.182  -3.863  1.00 11.20           N  
ATOM    150  CA  ASP A  39      10.792  -4.873  -2.943  1.00 14.96           C  
ATOM    151  C   ASP A  39      11.435  -3.950  -1.966  1.00 13.99           C  
ATOM    152  O   ASP A  39      11.712  -4.345  -0.835  1.00 13.75           O  
ATOM    153  N   GLN A  40      11.485  -2.635  -2.242  1.00 11.60           N  
ATOM    154  CA  GLN A  40      11.801  -1.621  -1.284  1.00 10.76           C  
ATOM    155  C   GLN A  40      10.619  -1.157  -0.505  1.00  8.01           C  
ATOM    156  O   GLN A  40      10.774  -0.648   0.604  1.00  8.96           O  
ATOM    157  N   GLN A  41       9.428  -1.320  -1.108  1.00  6.52           N  
ATOM    158  CA  GLN A  41       8.142  -0.934  -0.618  1.00  3.87           C  
ATOM    159  C   GLN A  41       7.528  -1.929   0.305  1.00  4.79           C  
ATOM    160  O   GLN A  41       7.622  -3.145   0.143  1.00  6.34           O  
ATOM    161  N   ARG A  42       6.905  -1.444   1.394  1.00  5.73           N  
ATOM    162  CA  ARG A  42       6.257  -2.305   2.334  1.00  6.97           C  
ATOM    163  C   ARG A  42       5.030  -1.581   2.771  1.00  7.15           C  
ATOM    164  O   ARG A  42       5.129  -0.441   3.224  1.00  7.33           O  
ATOM    165  N   LEU A  43       3.833  -2.168   2.598  1.00  4.65           N  
ATOM    166  CA  LEU A  43       2.567  -1.654   3.022  1.00  3.51           C  
ATOM    167  C   LEU A  43       2.166  -2.356   4.274  1.00  5.56           C  
ATOM    168  O   LEU A  43       2.178  -3.585   4.331  1.00  4.19           O  
ATOM    169  N   ILE A  44       1.857  -1.601   5.343  1.00  4.58           N  
ATOM    170  CA  ILE A  44       1.422  -2.174   6.579  1.00  5.55           C  
ATOM    171  C   ILE A  44       0.156  -1.442   6.865  1.00  5.46           C  
ATOM    172  O   ILE A  44      -0.137  -0.398   6.285  1.00  6.04           O  
ATOM    173  N   PHE A  45      -0.760  -2.064   7.630  1.00  6.75           N  
ATOM    174  CA  PHE A  45      -1.922  -1.348   8.056  1.00  4.70           C  
ATOM    175  C   PHE A  45      -1.641  -0.345   9.121  1.00  6.34           C  
ATOM    176  O   PHE A  45      -1.846   0.859   8.971  1.00  5.45           O  
ATOM    177  N   ALA A  46      -1.188  -0.784  10.308  1.00  6.53           N  
ATOM    178  CA  ALA A  46      -0.799   0.007  11.434  1.00  7.15           C  
ATOM    179  C   ALA A  46       0.474  -0.574  11.944  1.00  9.00           C  
ATOM    180  O   ALA A  46       1.317   0.174  12.437  1.00 11.15           O  
ATOM    181  N   GLY A  47       0.666  -1.905  11.918  1.00  9.35           N  
ATOM    182  CA  GLY A  47       1.849  -2.594  12.331  1.00 11.68           C  
ATOM    183  C   GLY A  47       2.083  -3.930  11.714  1.00 11.14           C  
ATOM    184  O   GLY A  47       3.112  -4.579  11.897  1.00 13.93           O  
ATOM    185  N   LYS A  48       1.016  -4.459  11.089  1.00 10.47           N  
ATOM    186  CA  LYS A  48       1.196  -5.746  10.492  1.00  8.82           C  
ATOM    187  C   LYS A  48       1.337  -5.522   9.025  1.00  7.68           C  
ATOM    188  O   LYS A  48       0.750  -4.599   8.463  1.00  6.47           O  
ATOM    189  N   GLN A  49       2.120  -6.390   8.359  1.00  8.89           N  
ATOM    190  CA  GLN A  49       2.511  -6.414   6.984  1.00  7.18           C  
ATOM    191  C   GLN A  49       1.738  -6.941   5.824  1.00  8.23           C  
ATOM    192  O   GLN A  49       1.343  -8.105   5.765  1.00  9.70           O  
ATOM    193  N   LEU A  50       1.264  -6.048   4.937  1.00  6.51           N  
ATOM    194  CA  LEU A  50       0.327  -6.355   3.901  1.00  7.41           C  
ATOM    195  C   LEU A  50       1.111  -6.818   2.721  1.00  8.27           C  
ATOM    196  O   LEU A  50       1.889  -6.102   2.093  1.00  8.34           O  
ATOM    197  N   GLU A  51       0.955  -8.111   2.386  1.00  9.43           N  
ATOM    198  CA  GLU A  51       1.914  -8.820   1.598  1.00 11.90           C  
ATOM    199  C   GLU A  51       1.295  -9.079   0.267  1.00 11.49           C  
ATOM    200  O   GLU A  51       0.088  -9.153   0.042  1.00  9.88           O  
ATOM    201  N   ASP A  52       2.150  -9.110  -0.770  1.00 12.71           N  
ATOM    202  CA  ASP A  52       1.934  -9.129  -2.184  1.00 16.56           C  
ATOM    203  C   ASP A  52       0.881 -10.032  -2.727  1.00 15.83           C  
ATOM    204  O   ASP A  52      -0.025  -9.533  -3.394  1.00 17.21           O  
ATOM    205  N   GLY A  53       0.991 -11.361  -2.554  1.00 15.00           N  
ATOM    206  CA  GLY A  53       0.426 -12.410  -3.345  1.00 11.77           C  
ATOM    207  C   GLY A  53      -1.058 -12.415  -3.214  1.00 11.10           C  
ATOM    208  O   GLY A  53      -1.771 -12.928  -4.076  1.00 11.25           O  
ATOM    209  N   ARG A  54      -1.573 -11.833  -2.117  1.00  8.53           N  
ATOM    210  CA  ARG A  54      -2.930 -11.964  -1.685  1.00  9.05           C  
ATOM    211  C   ARG A  54      -3.769 -10.789  -2.052  1.00  8.96           C  
ATOM    212  O   ARG A  54      -3.254  -9.688  -2.239  1.00 11.60           O  
ATOM    213  N   THR A  55      -5.102 -10.969  -2.081  1.00  9.05           N  
ATOM    214  CA  THR A  55      -6.044  -9.931  -2.365  1.00  9.03           C  
ATOM    215  C   THR A  55      -6.299  -8.924  -1.296  1.00  8.15           C  
ATOM    216  O   THR A  55      -6.210  -9.364  -0.151  1.00  5.91           O  
ATOM    217  N   LEU A  56      -6.766  -7.706  -1.622  1.00  6.91           N  
ATOM    218  CA  LEU A  56      -7.394  -6.907  -0.615  1.00  8.29           C  
ATOM    219  C   LEU A  56      -8.535  -7.457   0.169  1.00  8.05           C  
ATOM    220  O   LEU A  56      -8.692  -7.197   1.361  1.00 10.17           O  
ATOM    221  N   SER A  57      -9.393  -8.243  -0.505  1.00  8.92           N  
ATOM    222  CA  SER A  57     -10.418  -8.985   0.161  1.00  9.00           C  
ATOM    223  C   SER A  57      -9.971 -10.045   1.108  1.00  9.44           C  
ATOM    224  O   SER A  57     -10.590 -10.183   2.162  1.00 10.91           O  
ATOM    225  N   ASP A  58      -8.772 -10.635   0.953  1.00  9.11           N  
ATOM    226  CA  ASP A  58      -8.185 -11.501   1.927  1.00  7.91           C  
ATOM    227  C   ASP A  58      -7.708 -10.709   3.096  1.00  9.12           C  
ATOM    228  O   ASP A  58      -7.686 -11.299   4.175  1.00  8.61           O  
ATOM    229  N   TYR A  59      -7.435  -9.397   2.992  1.00  7.97           N  
ATOM    230  CA  TYR A  59      -6.980  -8.681   4.143  1.00  8.45           C  
ATOM    231  C   TYR A  59      -8.054  -7.949   4.873  1.00 10.98           C  
ATOM    232  O   TYR A  59      -7.841  -7.428   5.967  1.00 12.95           O  
ATOM    233  N   ASN A  60      -9.176  -7.902   4.133  1.00 12.38           N  
ATOM    234  CA  ASN A  60     -10.410  -7.205   4.321  1.00 13.94           C  
ATOM    235  C   ASN A  60     -10.279  -5.723   4.401  1.00 14.16           C  
ATOM    236  O   ASN A  60     -10.761  -5.036   5.301  1.00 14.26           O  
ATOM    237  N   ILE A  61      -9.504  -5.114   3.486  1.00 11.08           N  
ATOM    238  CA  ILE A  61      -9.319  -3.698   3.556  1.00 11.78           C  
ATOM    239  C   ILE A  61     -10.456  -2.952   2.947  1.00 13.74           C  
ATOM    240  O   ILE A  61     -10.684  -2.946   1.738  1.00 14.60           O  
ATOM    241  N   GLN A  62     -11.254  -2.303   3.813  1.00 13.97           N  
ATOM    242  CA  GLN A  62     -12.422  -1.609   3.366  1.00 15.52           C  
ATOM    243  C   GLN A  62     -12.255  -0.189   2.946  1.00 13.94           C  
ATOM    244  O   GLN A  62     -11.114   0.270   2.919  1.00 12.15           O  
ATOM    245  N   LYS A  63     -13.314   0.506   2.492  1.00 11.73           N  
ATOM    246  CA  LYS A  63     -13.272   1.804   1.893  1.00 11.97           C  
ATOM    247  C   LYS A  63     -12.749   2.855   2.811  1.00 10.41           C  
ATOM    248  O   LYS A  63     -13.105   3.084   3.966  1.00  9.59           O  
ATOM    249  N   GLU A  64     -11.908   3.717   2.212  1.00 10.04           N  
ATOM    250  CA  GLU A  64     -11.266   4.882   2.738  1.00 10.94           C  
ATOM    251  C   GLU A  64     -10.360   4.641   3.896  1.00  9.74           C  
ATOM    252  O   GLU A  64     -10.164   5.513   4.741  1.00  9.42           O  
ATOM    253  N   SER A  65      -9.769   3.433   3.870  1.00  6.85           N  
ATOM    254  CA  SER A  65      -8.816   2.997   4.843  1.00  6.90           C  
ATOM    255  C   SER A  65      -7.550   3.758   4.648  1.00  4.72           C  
ATOM    256  O   SER A  65      -7.136   4.021   3.520  1.00  3.91           O  
ATOM    257  N   THR A  66      -6.836   4.076   5.742  1.00  4.48           N  
ATOM    258  CA  THR A  66      -5.547   4.695   5.712  1.00  3.80           C  
ATOM    259  C   THR A  66      -4.596   3.553   5.818  1.00  4.60           C  
ATOM    260  O   THR A  66      -4.642   2.787   6.780  1.00  5.33           O  
ATOM    261  N   LEU A  67      -3.668   3.355   4.864  1.00  4.17           N  
ATOM    262  CA  LEU A  67      -2.683   2.325   4.980  1.00  3.85           C  
ATOM    263  C   LEU A  67      -1.389   3.060   5.036  1.00  3.80           C  
ATOM    264  O   LEU A  67      -1.226   4.152   4.492  1.00  5.54           O  
ATOM    265  N   HIS A  68      -0.358   2.486   5.681  1.00  2.94           N  
ATOM    266  CA  HIS A  68       0.897   3.146   5.866  1.00  4.17           C  
ATOM    267  C   HIS A  68       1.913   2.429   5.044  1.00  5.32           C  
ATOM    268  O   HIS A  68       2.194   1.231   5.042  1.00  7.70           O  
ATOM    269  N   LEU A  69       2.526   3.219   4.145  1.00  5.29           N  
ATOM    270  CA  LEU A  69       3.653   2.838   3.351  1.00  3.97           C  
ATOM    271  C   LEU A  69       4.847   3.109   4.200  1.00  5.07           C  
ATOM    272  O   LEU A  69       5.028   4.161   4.811  1.00  4.34           O  
ATOM    273  N   VAL A  70       5.751   2.113   4.172  1.00  4.29           N  
ATOM    274  CA  VAL A  70       7.011   2.084   4.848  1.00  6.26           C  
ATOM    275  C   VAL A  70       7.954   1.677   3.769  1.00  9.22           C  
ATOM    276  O   VAL A  70       7.610   0.969   2.824  1.00  9.36           O  
TER
ENDMDL
MODEL      7
ATOM      1  N   GLN A   2     -11.432   4.192  -2.546  1.00  9.27           N  
ATOM      2  CA  GLN A   2     -10.242   4.825  -2.069  1.00  9.07           C  
ATOM      3  C   GLN A   2      -9.673   4.108  -0.893  1.00  8.72           C  
ATOM      4  O   GLN A   2     -10.396   3.553  -0.067  1.00  8.22           O  
ATOM      5  N   ILE A   3      -8.331   4.041  -0.829  1.00  5.87           N  
ATOM      6  CA  ILE A   3      -7.620   3.782   0.384  1.00  5.07           C  
ATOM      7  C   ILE A   3      -6.528   4.795   0.425  1.00  4.01           C  
ATOM      8  O   ILE A   3      -6.197   5.466  -0.552  1.00  4.61           O  
ATOM      9  N   PHE A   4      -5.871   4.899   1.594  1.00  4.55           N  
ATOM     10  CA  PHE A   4      -4.765   5.785   1.787  1.00  4.68           C  
ATOM     11  C   PHE A   4      -3.487   5.104   2.135  1.00  5.30           C  
ATOM     12  O   PHE A   4      -3.418   3.952   2.560  1.00  5.58           O  
ATOM     13  N   VAL A   5      -2.356   5.788   1.885  1.00  4.44           N  
ATOM     14  CA  VAL A   5      -1.011   5.540   2.304  1.00  3.87           C  
ATOM     15  C   VAL A   5      -0.540   6.772   2.997  1.00  4.93           C  
ATOM     16  O   VAL A   5      -0.535   7.876   2.455  1.00  6.84           O  
ATOM     17  N   LYS A   6      -0.160   6.554   4.269  1.00  6.04           N  
ATOM     18  CA  LYS A   6       0.424   7.610   5.035  1.00  6.12           C  
ATOM     19  C   LYS A   6       1.882   7.328   5.161  1.00  6.57           C  
ATOM     20  O   LYS A   6       2.355   6.202   5.307  1.00  5.76           O  
ATOM     21  N   THR A   7       2.673   8.351   4.791  1.00  7.41           N  
ATOM     22  CA  THR A   7       4.098   8.277   4.702  1.00  7.48           C  
ATOM     23  C   THR A   7       4.629   8.638   6.047  1.00  8.75           C  
ATOM     24  O   THR A   7       3.967   9.212   6.910  1.00  8.58           O  
ATOM     25  N   LEU A   8       5.925   8.359   6.272  1.00  9.84           N  
ATOM     26  CA  LEU A   8       6.770   8.754   7.357  1.00 14.15           C  
ATOM     27  C   LEU A   8       6.982  10.228   7.344  1.00 17.37           C  
ATOM     28  O   LEU A   8       6.823  10.909   8.356  1.00 17.01           O  
ATOM     29  N   THR A   9       7.271  10.848   6.186  1.00 18.33           N  
ATOM     30  CA  THR A   9       7.474  12.246   5.965  1.00 19.24           C  
ATOM     31  C   THR A   9       6.317  13.156   6.196  1.00 19.48           C  
ATOM     32  O   THR A   9       6.433  14.310   6.605  1.00 23.14           O  
ATOM     33  N   GLY A  10       5.118  12.589   5.974  1.00 19.43           N  
ATOM     34  CA  GLY A  10       3.884  13.190   6.376  1.00 18.74           C  
ATOM     35  C   GLY A  10       3.039  13.464   5.179  1.00 17.62           C  
ATOM     36  O   GLY A  10       2.154  14.317   5.204  1.00 19.74           O  
ATOM     37  N   LYS A  11       3.117  12.703   4.072  1.00 13.56           N  
ATOM     38  CA  LYS A  11       2.151  12.691   3.018  1.00 11.91           C  
ATOM     39  C   LYS A  11       1.111  11.641   3.203  1.00 10.18           C  
ATOM     40  O   LYS A  11       1.353  10.505   3.606  1.00  9.10           O  
ATOM     41  N   THR A  12      -0.163  12.030   3.017  1.00  9.63           N  
ATOM     42  CA  THR A  12      -1.295  11.165   2.895  1.00  9.85           C  
ATOM     43  C   THR A  12      -1.588  11.078   1.437  1.00 11.66           C  
ATOM     44  O   THR A  12      -1.891  12.051   0.749  1.00 12.33           O  
ATOM     45  N   ILE A  13      -1.524   9.876   0.837  1.00 10.42           N  
ATOM     46  CA  ILE A  13      -1.618   9.580  -0.559  1.00 11.84           C  
ATOM     47  C   ILE A  13      -2.886   8.817  -0.731  1.00 10.55           C  
ATOM     48  O   ILE A  13      -3.052   7.737  -0.167  1.00 11.92           O  
ATOM     49  N   THR A  14      -3.866   9.375  -1.465  1.00  9.39           N  
ATOM     50  CA  THR A  14      -5.044   8.609  -1.732  1.00  9.63           C  
ATOM     51  C   THR A  14      -4.779   7.739  -2.912  1.00 11.20           C  
ATOM     52  O   THR A  14      -4.508   8.380  -3.927  1.00 11.63           O  
ATOM     53  N   LEU A  15      -4.931   6.403  -2.908  1.00  8.29           N  
ATOM     54  CA  LEU A  15      -4.935   5.570  -4.071  1.00  9.03           C  
ATOM     55  C   LEU A  15      -6.317   5.134  -4.417  1.00  8.59           C  
ATOM     56  O   LEU A  15      -7.108   4.860  -3.516  1.00  7.79           O  
ATOM     57  N   GLU A  16      -6.660   4.993  -5.710  1.00 11.04           N  
ATOM     58  CA  GLU A  16      -7.878   4.316  -6.030  1.00 11.50           C  
ATOM     59  C   GLU A  16      -7.649   2.895  -6.412  1.00 10.13           C  
ATOM     60  O   GLU A  16      -6.624   2.548  -6.996  1.00  9.83           O  
ATOM     61  N   VAL A  17      -8.437   1.984  -5.813  1.00  8.99           N  
ATOM     62  CA  VAL A  17      -8.232   0.569  -5.813  1.00  8.85           C  
ATOM     63  C   VAL A  17      -9.525  -0.134  -6.046  1.00  8.04           C  
ATOM     64  O   VAL A  17     -10.563   0.523  -5.977  1.00  8.99           O  
ATOM     65  N   GLU A  18      -9.590  -1.462  -6.251  1.00  7.29           N  
ATOM     66  CA  GLU A  18     -10.754  -2.252  -5.995  1.00  7.08           C  
ATOM     67  C   GLU A  18     -10.436  -3.271  -4.956  1.00  6.45           C  
ATOM     68  O   GLU A  18      -9.286  -3.467  -4.568  1.00  5.28           O  
ATOM     69  N   PRO A  19     -11.368  -4.010  -4.433  1.00  7.24           N  
ATOM     70  CA  PRO A  19     -11.071  -5.101  -3.550  1.00  7.07           C  
ATOM     71  C   PRO A  19     -10.141  -6.175  -3.998  1.00  6.65           C  
ATOM     72  O   PRO A  19      -9.440  -6.751  -3.168  1.00  6.37           O  
ATOM     73  N   SER A  20     -10.018  -6.542  -5.286  1.00  6.80           N  
ATOM     74  CA  SER A  20      -9.128  -7.576  -5.715  1.00  6.28           C  
ATOM     75  C   SER A  20      -7.793  -7.049  -6.114  1.00  8.45           C  
ATOM     76  O   SER A  20      -6.966  -7.824  -6.592  1.00  7.26           O  
ATOM     77  N   ASP A  21      -7.367  -5.809  -5.813  1.00  7.50           N  
ATOM     78  CA  ASP A  21      -6.024  -5.384  -6.059  1.00  7.70           C  
ATOM     79  C   ASP A  21      -4.994  -5.899  -5.114  1.00  7.08           C  
ATOM     80  O   ASP A  21      -5.141  -5.944  -3.893  1.00  8.11           O  
ATOM     81  N   THR A  22      -3.864  -6.276  -5.737  1.00  5.37           N  
ATOM     82  CA  THR A  22      -2.817  -6.956  -5.039  1.00  6.01           C  
ATOM     83  C   THR A  22      -1.927  -5.964  -4.372  1.00  8.01           C  
ATOM     84  O   THR A  22      -1.957  -4.772  -4.675  1.00  8.11           O  
ATOM     85  N   ILE A  23      -1.072  -6.346  -3.408  1.00  8.32           N  
ATOM     86  CA  ILE A  23      -0.305  -5.355  -2.720  1.00  9.92           C  
ATOM     87  C   ILE A  23       0.857  -4.907  -3.537  1.00 10.01           C  
ATOM     88  O   ILE A  23       1.348  -3.811  -3.274  1.00  8.71           O  
ATOM     89  N   GLU A  24       1.240  -5.689  -4.563  1.00  9.54           N  
ATOM     90  CA  GLU A  24       2.096  -5.371  -5.664  1.00 11.81           C  
ATOM     91  C   GLU A  24       1.509  -4.277  -6.488  1.00 11.14           C  
ATOM     92  O   GLU A  24       2.146  -3.262  -6.767  1.00 10.62           O  
ATOM     93  N   ASN A  25       0.240  -4.421  -6.908  1.00  9.43           N  
ATOM     94  CA  ASN A  25      -0.386  -3.436  -7.734  1.00 10.96           C  
ATOM     95  C   ASN A  25      -0.568  -2.160  -6.986  1.00  9.68           C  
ATOM     96  O   ASN A  25      -0.481  -1.083  -7.575  1.00  9.33           O  
ATOM     97  N   VAL A  26      -0.645  -2.247  -5.647  1.00  6.52           N  
ATOM     98  CA  VAL A  26      -0.550  -1.088  -4.814  1.00  5.53           C  
ATOM     99  C   VAL A  26       0.758  -0.374  -4.811  1.00  4.42           C  
ATOM    100  O   VAL A  26       0.870   0.815  -5.106  1.00  3.40           O  
ATOM    101  N   LYS A  27       1.851  -1.087  -4.488  1.00  2.64           N  
ATOM    102  CA  LYS A  27       3.155  -0.574  -4.774  1.00  4.14           C  
ATOM    103  C   LYS A  27       3.482  -0.072  -6.138  1.00  5.58           C  
ATOM    104  O   LYS A  27       4.259   0.881  -6.162  1.00  4.11           O  
ATOM    105  N   ALA A  28       2.883  -0.601  -7.219  1.00  6.61           N  
ATOM    106  CA  ALA A  28       2.946  -0.093  -8.555  1.00  7.74           C  
ATOM    107  C   ALA A  28       2.355   1.252  -8.802  1.00  9.17           C  
ATOM    108  O   ALA A  28       2.979   2.068  -9.479  1.00 11.45           O  
ATOM    109  N   LYS A  29       1.172   1.482  -8.205  1.00  8.96           N  
ATOM    110  CA  LYS A  29       0.511   2.749  -8.149  1.00  7.90           C  
ATOM    111  C   LYS A  29       1.236   3.841  -7.441  1.00  6.92           C  
ATOM    112  O   LYS A  29       1.094   4.999  -7.831  1.00  6.87           O  
ATOM    113  N   ILE A  30       2.046   3.544  -6.409  1.00  4.57           N  
ATOM    114  CA  ILE A  30       2.794   4.480  -5.629  1.00  5.58           C  
ATOM    115  C   ILE A  30       4.098   4.798  -6.276  1.00  7.26           C  
ATOM    116  O   ILE A  30       4.445   5.968  -6.430  1.00  9.46           O  
ATOM    117  N   GLN A  31       4.754   3.767  -6.838  1.00  7.06           N  
ATOM    118  CA  GLN A  31       5.839   3.801  -7.769  1.00  8.67           C  
ATOM    119  C   GLN A  31       5.689   4.701  -8.947  1.00 10.90           C  
ATOM    120  O   GLN A  31       6.480   5.609  -9.199  1.00  9.63           O  
ATOM    121  N   ASP A  32       4.537   4.526  -9.619  1.00 10.93           N  
ATOM    122  CA  ASP A  32       3.946   5.363 -10.616  1.00 14.01           C  
ATOM    123  C   ASP A  32       3.725   6.757 -10.138  1.00 14.04           C  
ATOM    124  O   ASP A  32       3.970   7.721 -10.861  1.00 13.39           O  
ATOM    125  N   LYS A  33       3.294   7.044  -8.897  1.00 14.22           N  
ATOM    126  CA  LYS A  33       2.844   8.332  -8.468  1.00 14.00           C  
ATOM    127  C   LYS A  33       4.013   9.129  -8.000  1.00 12.37           C  
ATOM    128  O   LYS A  33       4.563  10.014  -8.653  1.00 12.17           O  
ATOM    129  N   GLU A  34       4.595   8.770  -6.842  1.00 10.11           N  
ATOM    130  CA  GLU A  34       5.609   9.493  -6.138  1.00 10.07           C  
ATOM    131  C   GLU A  34       7.031   9.193  -6.466  1.00  9.32           C  
ATOM    132  O   GLU A  34       7.913  10.049  -6.431  1.00 11.61           O  
ATOM    133  N   GLY A  35       7.233   7.950  -6.939  1.00  7.22           N  
ATOM    134  CA  GLY A  35       8.524   7.440  -7.283  1.00  6.29           C  
ATOM    135  C   GLY A  35       9.246   6.721  -6.197  1.00  6.93           C  
ATOM    136  O   GLY A  35      10.449   6.949  -6.074  1.00  7.41           O  
ATOM    137  N   ILE A  36       8.606   5.841  -5.406  1.00  5.86           N  
ATOM    138  CA  ILE A  36       9.248   5.035  -4.415  1.00  6.07           C  
ATOM    139  C   ILE A  36       9.640   3.754  -5.068  1.00  6.36           C  
ATOM    140  O   ILE A  36       8.657   3.182  -5.536  1.00  6.18           O  
ATOM    141  N   PRO A  37      10.806   3.186  -5.150  1.00  8.65           N  
ATOM    142  CA  PRO A  37      11.039   1.977  -5.886  1.00  9.18           C  
ATOM    143  C   PRO A  37      10.556   0.774  -5.152  1.00  9.85           C  
ATOM    144  O   PRO A  37      10.559   0.740  -3.923  1.00  8.51           O  
ATOM    145  N   PRO A  38      10.100  -0.218  -5.858  1.00  8.71           N  
ATOM    146  CA  PRO A  38       9.241  -1.161  -5.203  1.00  9.08           C  
ATOM    147  C   PRO A  38       9.932  -2.023  -4.203  1.00  9.28           C  
ATOM    148  O   PRO A  38       9.231  -2.589  -3.366  1.00  6.50           O  
ATOM    149  N   ASP A  39      11.259  -2.241  -4.200  1.00 11.20           N  
ATOM    150  CA  ASP A  39      11.931  -3.010  -3.198  1.00 14.96           C  
ATOM    151  C   ASP A  39      11.986  -2.297  -1.891  1.00 13.99           C  
ATOM    152  O   ASP A  39      12.092  -2.947  -0.852  1.00 13.75           O  
ATOM    153  N   GLN A  40      11.975  -0.952  -1.925  1.00 11.60           N  
ATOM    154  CA  GLN A  40      11.974  -0.074  -0.796  1.00 10.76           C  
ATOM    155  C   GLN A  40      10.621   0.002  -0.177  1.00  8.01           C  
ATOM    156  O   GLN A  40      10.515   0.222   1.028  1.00  8.96           O  
ATOM    157  N   GLN A  41       9.566  -0.301  -0.954  1.00  6.52           N  
ATOM    158  CA  GLN A  41       8.238  -0.184  -0.436  1.00  3.87           C  
ATOM    159  C   GLN A  41       7.843  -1.303   0.465  1.00  4.79           C  
ATOM    160  O   GLN A  41       7.595  -2.403  -0.028  1.00  6.34           O  
ATOM    161  N   ARG A  42       7.737  -1.118   1.793  1.00  5.73           N  
ATOM    162  CA  ARG A  42       7.179  -2.056   2.717  1.00  6.97           C  
ATOM    163  C   ARG A  42       5.913  -1.516   3.286  1.00  7.15           C  
ATOM    164  O   ARG A  42       5.827  -0.457   3.907  1.00  7.33           O  
ATOM    165  N   LEU A  43       4.798  -2.192   2.956  1.00  4.65           N  
ATOM    166  CA  LEU A  43       3.499  -1.781   3.389  1.00  3.51           C  
ATOM    167  C   LEU A  43       3.072  -2.602   4.557  1.00  5.56           C  
ATOM    168  O   LEU A  43       2.937  -3.819   4.446  1.00  4.19           O  
ATOM    169  N   ILE A  44       2.855  -1.955   5.716  1.00  4.58           N  
ATOM    170  CA  ILE A  44       2.189  -2.455   6.879  1.00  5.55           C  
ATOM    171  C   ILE A  44       0.766  -2.024   6.959  1.00  5.46           C  
ATOM    172  O   ILE A  44       0.456  -0.940   6.467  1.00  6.04           O  
ATOM    173  N   PHE A  45      -0.105  -2.751   7.683  1.00  6.75           N  
ATOM    174  CA  PHE A  45      -1.369  -2.250   8.123  1.00  4.70           C  
ATOM    175  C   PHE A  45      -1.134  -1.409   9.330  1.00  6.34           C  
ATOM    176  O   PHE A  45      -1.346  -0.198   9.363  1.00  5.45           O  
ATOM    177  N   ALA A  46      -0.744  -2.058  10.442  1.00  6.53           N  
ATOM    178  CA  ALA A  46      -0.512  -1.347  11.660  1.00  7.15           C  
ATOM    179  C   ALA A  46       0.823  -1.813  12.132  1.00  9.00           C  
ATOM    180  O   ALA A  46       1.651  -0.943  12.395  1.00 11.15           O  
ATOM    181  N   GLY A  47       1.008  -3.116  12.411  1.00  9.35           N  
ATOM    182  CA  GLY A  47       2.111  -3.906  12.863  1.00 11.68           C  
ATOM    183  C   GLY A  47       2.452  -5.054  11.976  1.00 11.14           C  
ATOM    184  O   GLY A  47       3.543  -5.622  11.957  1.00 13.93           O  
ATOM    185  N   LYS A  48       1.469  -5.548  11.202  1.00 10.47           N  
ATOM    186  CA  LYS A  48       1.621  -6.688  10.352  1.00  8.82           C  
ATOM    187  C   LYS A  48       1.874  -6.236   8.955  1.00  7.68           C  
ATOM    188  O   LYS A  48       1.253  -5.295   8.464  1.00  6.47           O  
ATOM    189  N   GLN A  49       2.790  -6.928   8.253  1.00  8.89           N  
ATOM    190  CA  GLN A  49       3.177  -6.539   6.932  1.00  7.18           C  
ATOM    191  C   GLN A  49       2.340  -7.176   5.878  1.00  8.23           C  
ATOM    192  O   GLN A  49       1.750  -8.240   6.064  1.00  9.70           O  
ATOM    193  N   LEU A  50       2.130  -6.460   4.759  1.00  6.51           N  
ATOM    194  CA  LEU A  50       1.340  -6.862   3.637  1.00  7.41           C  
ATOM    195  C   LEU A  50       2.213  -7.379   2.546  1.00  8.27           C  
ATOM    196  O   LEU A  50       3.074  -6.661   2.040  1.00  8.34           O  
ATOM    197  N   GLU A  51       2.051  -8.656   2.155  1.00  9.43           N  
ATOM    198  CA  GLU A  51       2.939  -9.197   1.174  1.00 11.90           C  
ATOM    199  C   GLU A  51       2.353  -9.093  -0.192  1.00 11.49           C  
ATOM    200  O   GLU A  51       1.153  -9.265  -0.398  1.00  9.88           O  
ATOM    201  N   ASP A  52       3.236  -8.916  -1.191  1.00 12.71           N  
ATOM    202  CA  ASP A  52       3.007  -8.522  -2.547  1.00 16.56           C  
ATOM    203  C   ASP A  52       1.862  -9.180  -3.236  1.00 15.83           C  
ATOM    204  O   ASP A  52       1.014  -8.531  -3.847  1.00 17.21           O  
ATOM    205  N   GLY A  53       1.733 -10.516  -3.153  1.00 15.00           N  
ATOM    206  CA  GLY A  53       0.865 -11.277  -3.998  1.00 11.77           C  
ATOM    207  C   GLY A  53      -0.459 -11.632  -3.414  1.00 11.10           C  
ATOM    208  O   GLY A  53      -0.855 -12.742  -3.765  1.00 11.25           O  
ATOM    209  N   ARG A  54      -1.100 -10.846  -2.531  1.00  8.53           N  
ATOM    210  CA  ARG A  54      -2.409 -11.167  -2.053  1.00  9.05           C  
ATOM    211  C   ARG A  54      -3.218  -9.930  -2.240  1.00  8.96           C  
ATOM    212  O   ARG A  54      -2.622  -8.902  -2.557  1.00 11.60           O  
ATOM    213  N   THR A  55      -4.549  -9.915  -2.050  1.00  9.05           N  
ATOM    214  CA  THR A  55      -5.371  -8.777  -2.321  1.00  9.03           C  
ATOM    215  C   THR A  55      -5.701  -8.013  -1.085  1.00  8.15           C  
ATOM    216  O   THR A  55      -5.601  -8.579   0.002  1.00  5.91           O  
ATOM    217  N   LEU A  56      -6.274  -6.804  -1.224  1.00  6.91           N  
ATOM    218  CA  LEU A  56      -6.813  -6.070  -0.122  1.00  8.29           C  
ATOM    219  C   LEU A  56      -7.820  -6.820   0.681  1.00  8.05           C  
ATOM    220  O   LEU A  56      -7.834  -6.649   1.899  1.00 10.17           O  
ATOM    221  N   SER A  57      -8.690  -7.581  -0.007  1.00  8.92           N  
ATOM    222  CA  SER A  57      -9.798  -8.377   0.422  1.00  9.00           C  
ATOM    223  C   SER A  57      -9.379  -9.508   1.298  1.00  9.44           C  
ATOM    224  O   SER A  57      -9.812  -9.583   2.447  1.00 10.91           O  
ATOM    225  N   ASP A  58      -8.372 -10.277   0.846  1.00  9.11           N  
ATOM    226  CA  ASP A  58      -7.612 -11.279   1.527  1.00  7.91           C  
ATOM    227  C   ASP A  58      -7.228 -10.819   2.891  1.00  9.12           C  
ATOM    228  O   ASP A  58      -7.577 -11.450   3.888  1.00  8.61           O  
ATOM    229  N   TYR A  59      -6.514  -9.680   2.908  1.00  7.97           N  
ATOM    230  CA  TYR A  59      -6.137  -8.899   4.045  1.00  8.45           C  
ATOM    231  C   TYR A  59      -7.167  -8.413   5.006  1.00 10.98           C  
ATOM    232  O   TYR A  59      -6.794  -8.039   6.117  1.00 12.95           O  
ATOM    233  N   ASN A  60      -8.434  -8.347   4.561  1.00 12.38           N  
ATOM    234  CA  ASN A  60      -9.500  -7.608   5.164  1.00 13.94           C  
ATOM    235  C   ASN A  60      -9.149  -6.173   5.364  1.00 14.16           C  
ATOM    236  O   ASN A  60      -9.297  -5.622   6.453  1.00 14.26           O  
ATOM    237  N   ILE A  61      -8.761  -5.413   4.325  1.00 11.08           N  
ATOM    238  CA  ILE A  61      -8.671  -3.986   4.282  1.00 11.78           C  
ATOM    239  C   ILE A  61      -9.934  -3.411   3.737  1.00 13.74           C  
ATOM    240  O   ILE A  61     -10.427  -3.835   2.693  1.00 14.60           O  
ATOM    241  N   GLN A  62     -10.486  -2.390   4.416  1.00 13.97           N  
ATOM    242  CA  GLN A  62     -11.822  -1.979   4.117  1.00 15.52           C  
ATOM    243  C   GLN A  62     -11.842  -0.699   3.354  1.00 13.94           C  
ATOM    244  O   GLN A  62     -10.813  -0.300   2.811  1.00 12.15           O  
ATOM    245  N   LYS A  63     -12.992  -0.011   3.237  1.00 11.73           N  
ATOM    246  CA  LYS A  63     -12.954   1.213   2.500  1.00 11.97           C  
ATOM    247  C   LYS A  63     -12.397   2.342   3.297  1.00 10.41           C  
ATOM    248  O   LYS A  63     -12.832   2.595   4.419  1.00  9.59           O  
ATOM    249  N   GLU A  64     -11.361   2.985   2.729  1.00 10.04           N  
ATOM    250  CA  GLU A  64     -10.698   4.154   3.218  1.00 10.94           C  
ATOM    251  C   GLU A  64      -9.919   3.940   4.470  1.00  9.74           C  
ATOM    252  O   GLU A  64      -9.697   4.821   5.299  1.00  9.42           O  
ATOM    253  N   SER A  65      -9.423   2.718   4.733  1.00  6.85           N  
ATOM    254  CA  SER A  65      -8.397   2.495   5.704  1.00  6.90           C  
ATOM    255  C   SER A  65      -7.017   2.904   5.319  1.00  4.72           C  
ATOM    256  O   SER A  65      -6.747   2.972   4.120  1.00  3.91           O  
ATOM    257  N   THR A  66      -6.196   3.208   6.340  1.00  4.48           N  
ATOM    258  CA  THR A  66      -4.868   3.691   6.119  1.00  3.80           C  
ATOM    259  C   THR A  66      -3.877   2.579   6.119  1.00  4.60           C  
ATOM    260  O   THR A  66      -3.909   1.690   6.968  1.00  5.33           O  
ATOM    261  N   LEU A  67      -3.083   2.487   5.036  1.00  4.17           N  
ATOM    262  CA  LEU A  67      -1.937   1.636   4.954  1.00  3.85           C  
ATOM    263  C   LEU A  67      -0.807   2.512   5.371  1.00  3.80           C  
ATOM    264  O   LEU A  67      -0.865   3.722   5.156  1.00  5.54           O  
ATOM    265  N   HIS A  68       0.291   1.933   5.889  1.00  2.94           N  
ATOM    266  CA  HIS A  68       1.365   2.743   6.372  1.00  4.17           C  
ATOM    267  C   HIS A  68       2.612   2.375   5.645  1.00  5.32           C  
ATOM    268  O   HIS A  68       3.111   1.269   5.848  1.00  7.70           O  
ATOM    269  N   LEU A  69       3.070   3.253   4.735  1.00  5.29           N  
ATOM    270  CA  LEU A  69       4.312   3.022   4.066  1.00  3.97           C  
ATOM    271  C   LEU A  69       5.440   3.381   4.971  1.00  5.07           C  
ATOM    272  O   LEU A  69       5.640   4.529   5.366  1.00  4.34           O  
ATOM    273  N   VAL A  70       6.287   2.370   5.235  1.00  4.29           N  
ATOM    274  CA  VAL A  70       7.433   2.389   6.090  1.00  6.26           C  
ATOM    275  C   VAL A  70       8.593   1.902   5.292  1.00  9.22           C  
ATOM    276  O   VAL A  70       8.489   1.635   4.096  1.00  9.36           O  
TER
ENDMDL
MODEL      8
ATOM      1  N   GLN A   2     -10.693   4.554  -4.904  1.00  9.27           N  
ATOM      2  CA  GLN A   2      -9.631   5.304  -4.309  1.00  9.07           C  
ATOM      3  C   GLN A   2      -9.212   4.513  -3.118  1.00  8.72           C  
ATOM      4  O   GLN A   2     -10.075   4.054  -2.371  1.00  8.22           O  
ATOM      5  N   ILE A   3      -7.941   4.123  -2.916  1.00  5.87           N  
ATOM      6  CA  ILE A   3      -7.480   3.757  -1.613  1.00  5.07           C  
ATOM      7  C   ILE A   3      -6.316   4.643  -1.328  1.00  4.01           C  
ATOM      8  O   ILE A   3      -5.684   5.265  -2.181  1.00  4.61           O  
ATOM      9  N   PHE A   4      -5.968   4.813  -0.040  1.00  4.55           N  
ATOM     10  CA  PHE A   4      -4.953   5.741   0.350  1.00  4.68           C  
ATOM     11  C   PHE A   4      -3.741   5.054   0.878  1.00  5.30           C  
ATOM     12  O   PHE A   4      -3.767   4.086   1.637  1.00  5.58           O  
ATOM     13  N   VAL A   5      -2.613   5.611   0.404  1.00  4.44           N  
ATOM     14  CA  VAL A   5      -1.351   5.236   0.963  1.00  3.87           C  
ATOM     15  C   VAL A   5      -0.770   6.391   1.703  1.00  4.93           C  
ATOM     16  O   VAL A   5      -0.696   7.543   1.278  1.00  6.84           O  
ATOM     17  N   LYS A   6      -0.429   6.178   2.986  1.00  6.04           N  
ATOM     18  CA  LYS A   6       0.195   7.160   3.818  1.00  6.12           C  
ATOM     19  C   LYS A   6       1.628   6.820   4.043  1.00  6.57           C  
ATOM     20  O   LYS A   6       1.976   5.720   4.469  1.00  5.76           O  
ATOM     21  N   THR A   7       2.497   7.790   3.704  1.00  7.41           N  
ATOM     22  CA  THR A   7       3.914   7.619   3.799  1.00  7.48           C  
ATOM     23  C   THR A   7       4.424   8.032   5.137  1.00  8.75           C  
ATOM     24  O   THR A   7       3.759   8.663   5.957  1.00  8.58           O  
ATOM     25  N   LEU A   8       5.659   7.596   5.443  1.00  9.84           N  
ATOM     26  CA  LEU A   8       6.349   7.842   6.672  1.00 14.15           C  
ATOM     27  C   LEU A   8       6.673   9.277   6.908  1.00 17.37           C  
ATOM     28  O   LEU A   8       6.700   9.778   8.031  1.00 17.01           O  
ATOM     29  N   THR A   9       7.076   9.927   5.801  1.00 18.33           N  
ATOM     30  CA  THR A   9       7.546  11.270   5.658  1.00 19.24           C  
ATOM     31  C   THR A   9       6.345  12.140   5.797  1.00 19.48           C  
ATOM     32  O   THR A   9       6.463  13.204   6.402  1.00 23.14           O  
ATOM     33  N   GLY A  10       5.178  11.651   5.341  1.00 19.43           N  
ATOM     34  CA  GLY A  10       3.900  12.155   5.740  1.00 18.74           C  
ATOM     35  C   GLY A  10       3.082  12.768   4.657  1.00 17.62           C  
ATOM     36  O   GLY A  10       2.675  13.927   4.709  1.00 19.74           O  
ATOM     37  N   LYS A  11       2.935  12.097   3.500  1.00 13.56           N  
ATOM     38  CA  LYS A  11       2.037  12.381   2.424  1.00 11.91           C  
ATOM     39  C   LYS A  11       0.982  11.329   2.407  1.00 10.18           C  
ATOM     40  O   LYS A  11       1.292  10.141   2.333  1.00  9.10           O  
ATOM     41  N   THR A  12      -0.318  11.671   2.442  1.00  9.63           N  
ATOM     42  CA  THR A  12      -1.457  10.831   2.236  1.00  9.85           C  
ATOM     43  C   THR A  12      -1.917  10.839   0.818  1.00 11.66           C  
ATOM     44  O   THR A  12      -2.661  11.718   0.387  1.00 12.33           O  
ATOM     45  N   ILE A  13      -1.457   9.852   0.029  1.00 10.42           N  
ATOM     46  CA  ILE A  13      -1.356   9.757  -1.394  1.00 11.84           C  
ATOM     47  C   ILE A  13      -2.477   8.885  -1.845  1.00 10.55           C  
ATOM     48  O   ILE A  13      -2.683   7.739  -1.448  1.00 11.92           O  
ATOM     49  N   THR A  14      -3.310   9.372  -2.782  1.00  9.39           N  
ATOM     50  CA  THR A  14      -4.381   8.637  -3.381  1.00  9.63           C  
ATOM     51  C   THR A  14      -3.961   7.735  -4.489  1.00 11.20           C  
ATOM     52  O   THR A  14      -3.361   8.128  -5.488  1.00 11.63           O  
ATOM     53  N   LEU A  15      -4.171   6.408  -4.414  1.00  8.29           N  
ATOM     54  CA  LEU A  15      -3.919   5.453  -5.448  1.00  9.03           C  
ATOM     55  C   LEU A  15      -5.214   4.988  -6.021  1.00  8.59           C  
ATOM     56  O   LEU A  15      -6.196   4.970  -5.281  1.00  7.79           O  
ATOM     57  N   GLU A  16      -5.284   4.754  -7.343  1.00 11.04           N  
ATOM     58  CA  GLU A  16      -6.378   4.367  -8.178  1.00 11.50           C  
ATOM     59  C   GLU A  16      -6.216   2.970  -8.671  1.00 10.13           C  
ATOM     60  O   GLU A  16      -5.374   2.592  -9.484  1.00  9.83           O  
ATOM     61  N   VAL A  17      -7.044   2.122  -8.035  1.00  8.99           N  
ATOM     62  CA  VAL A  17      -6.917   0.709  -8.213  1.00  8.85           C  
ATOM     63  C   VAL A  17      -8.275   0.144  -8.451  1.00  8.04           C  
ATOM     64  O   VAL A  17      -9.219   0.880  -8.171  1.00  8.99           O  
ATOM     65  N   GLU A  18      -8.391  -1.040  -9.078  1.00  7.29           N  
ATOM     66  CA  GLU A  18      -9.562  -1.854  -8.972  1.00  7.08           C  
ATOM     67  C   GLU A  18      -9.518  -2.801  -7.822  1.00  6.45           C  
ATOM     68  O   GLU A  18      -8.465  -3.063  -7.243  1.00  5.28           O  
ATOM     69  N   PRO A  19     -10.521  -3.491  -7.368  1.00  7.24           N  
ATOM     70  CA  PRO A  19     -10.371  -4.428  -6.292  1.00  7.07           C  
ATOM     71  C   PRO A  19      -9.608  -5.650  -6.671  1.00  6.65           C  
ATOM     72  O   PRO A  19      -9.030  -6.216  -5.745  1.00  6.37           O  
ATOM     73  N   SER A  20      -9.579  -6.006  -7.968  1.00  6.80           N  
ATOM     74  CA  SER A  20      -8.817  -7.168  -8.306  1.00  6.28           C  
ATOM     75  C   SER A  20      -7.436  -6.923  -8.809  1.00  8.45           C  
ATOM     76  O   SER A  20      -6.766  -7.841  -9.280  1.00  7.26           O  
ATOM     77  N   ASP A  21      -6.881  -5.716  -8.602  1.00  7.50           N  
ATOM     78  CA  ASP A  21      -5.505  -5.337  -8.692  1.00  7.70           C  
ATOM     79  C   ASP A  21      -4.766  -6.006  -7.586  1.00  7.08           C  
ATOM     80  O   ASP A  21      -5.321  -6.133  -6.495  1.00  8.11           O  
ATOM     81  N   THR A  22      -3.571  -6.565  -7.851  1.00  5.37           N  
ATOM     82  CA  THR A  22      -2.735  -7.317  -6.968  1.00  6.01           C  
ATOM     83  C   THR A  22      -1.998  -6.338  -6.121  1.00  8.01           C  
ATOM     84  O   THR A  22      -1.994  -5.129  -6.345  1.00  8.11           O  
ATOM     85  N   ILE A  23      -1.336  -6.818  -5.053  1.00  8.32           N  
ATOM     86  CA  ILE A  23      -0.517  -6.004  -4.209  1.00  9.92           C  
ATOM     87  C   ILE A  23       0.734  -5.778  -4.986  1.00 10.01           C  
ATOM     88  O   ILE A  23       1.233  -4.657  -4.897  1.00  8.71           O  
ATOM     89  N   GLU A  24       1.242  -6.730  -5.790  1.00  9.54           N  
ATOM     90  CA  GLU A  24       2.183  -6.544  -6.850  1.00 11.81           C  
ATOM     91  C   GLU A  24       1.948  -5.389  -7.762  1.00 11.14           C  
ATOM     92  O   GLU A  24       2.837  -4.608  -8.097  1.00 10.62           O  
ATOM     93  N   ASN A  25       0.720  -5.154  -8.258  1.00  9.43           N  
ATOM     94  CA  ASN A  25       0.433  -3.980  -9.023  1.00 10.96           C  
ATOM     95  C   ASN A  25       0.469  -2.749  -8.184  1.00  9.68           C  
ATOM     96  O   ASN A  25       0.849  -1.695  -8.691  1.00  9.33           O  
ATOM     97  N   VAL A  26       0.098  -2.804  -6.892  1.00  6.52           N  
ATOM     98  CA  VAL A  26       0.196  -1.640  -6.068  1.00  5.53           C  
ATOM     99  C   VAL A  26       1.568  -1.100  -5.852  1.00  4.42           C  
ATOM    100  O   VAL A  26       1.846   0.095  -5.940  1.00  3.40           O  
ATOM    101  N   LYS A  27       2.577  -1.974  -5.690  1.00  2.64           N  
ATOM    102  CA  LYS A  27       3.934  -1.529  -5.608  1.00  4.14           C  
ATOM    103  C   LYS A  27       4.535  -1.022  -6.874  1.00  5.58           C  
ATOM    104  O   LYS A  27       5.395  -0.143  -6.869  1.00  4.11           O  
ATOM    105  N   ALA A  28       3.988  -1.422  -8.036  1.00  6.61           N  
ATOM    106  CA  ALA A  28       4.321  -0.894  -9.323  1.00  7.74           C  
ATOM    107  C   ALA A  28       3.848   0.499  -9.556  1.00  9.17           C  
ATOM    108  O   ALA A  28       4.635   1.262 -10.114  1.00 11.45           O  
ATOM    109  N   LYS A  29       2.676   0.884  -9.018  1.00  8.96           N  
ATOM    110  CA  LYS A  29       2.172   2.216  -8.897  1.00  7.90           C  
ATOM    111  C   LYS A  29       2.808   3.145  -7.920  1.00  6.92           C  
ATOM    112  O   LYS A  29       3.136   4.282  -8.254  1.00  6.87           O  
ATOM    113  N   ILE A  30       3.164   2.679  -6.710  1.00  4.57           N  
ATOM    114  CA  ILE A  30       3.884   3.466  -5.757  1.00  5.58           C  
ATOM    115  C   ILE A  30       5.268   3.770  -6.215  1.00  7.26           C  
ATOM    116  O   ILE A  30       5.804   4.851  -5.975  1.00  9.46           O  
ATOM    117  N   GLN A  31       5.893   2.854  -6.976  1.00  7.06           N  
ATOM    118  CA  GLN A  31       7.162   2.975  -7.624  1.00  8.67           C  
ATOM    119  C   GLN A  31       7.229   3.986  -8.716  1.00 10.90           C  
ATOM    120  O   GLN A  31       8.233   4.694  -8.779  1.00  9.63           O  
ATOM    121  N   ASP A  32       6.243   4.109  -9.623  1.00 10.93           N  
ATOM    122  CA  ASP A  32       6.083   5.168 -10.570  1.00 14.01           C  
ATOM    123  C   ASP A  32       5.514   6.436 -10.033  1.00 14.04           C  
ATOM    124  O   ASP A  32       5.763   7.512 -10.574  1.00 13.39           O  
ATOM    125  N   LYS A  33       4.681   6.483  -8.978  1.00 14.22           N  
ATOM    126  CA  LYS A  33       4.249   7.695  -8.353  1.00 14.00           C  
ATOM    127  C   LYS A  33       5.363   8.288  -7.561  1.00 12.37           C  
ATOM    128  O   LYS A  33       5.860   9.330  -7.985  1.00 12.17           O  
ATOM    129  N   GLU A  34       5.860   7.732  -6.441  1.00 10.11           N  
ATOM    130  CA  GLU A  34       6.855   8.268  -5.566  1.00 10.07           C  
ATOM    131  C   GLU A  34       8.218   8.003  -6.107  1.00  9.32           C  
ATOM    132  O   GLU A  34       9.047   8.907  -6.188  1.00 11.61           O  
ATOM    133  N   GLY A  35       8.566   6.770  -6.518  1.00  7.22           N  
ATOM    134  CA  GLY A  35       9.898   6.379  -6.863  1.00  6.29           C  
ATOM    135  C   GLY A  35      10.416   5.322  -5.950  1.00  6.93           C  
ATOM    136  O   GLY A  35      11.613   5.046  -6.000  1.00  7.41           O  
ATOM    137  N   ILE A  36       9.582   4.755  -5.058  1.00  5.86           N  
ATOM    138  CA  ILE A  36      10.085   3.761  -4.162  1.00  6.07           C  
ATOM    139  C   ILE A  36      10.168   2.373  -4.697  1.00  6.36           C  
ATOM    140  O   ILE A  36       9.136   1.877  -5.146  1.00  6.18           O  
ATOM    141  N   PRO A  37      11.290   1.724  -4.604  1.00  8.65           N  
ATOM    142  CA  PRO A  37      11.413   0.378  -5.085  1.00  9.18           C  
ATOM    143  C   PRO A  37      10.588  -0.659  -4.405  1.00  9.85           C  
ATOM    144  O   PRO A  37      10.319  -0.433  -3.226  1.00  8.51           O  
ATOM    145  N   PRO A  38      10.145  -1.734  -4.989  1.00  8.71           N  
ATOM    146  CA  PRO A  38       9.162  -2.570  -4.365  1.00  9.08           C  
ATOM    147  C   PRO A  38       9.668  -3.360  -3.208  1.00  9.28           C  
ATOM    148  O   PRO A  38       8.877  -3.757  -2.353  1.00  6.50           O  
ATOM    149  N   ASP A  39      10.994  -3.567  -3.117  1.00 11.20           N  
ATOM    150  CA  ASP A  39      11.587  -4.035  -1.903  1.00 14.96           C  
ATOM    151  C   ASP A  39      11.484  -3.112  -0.737  1.00 13.99           C  
ATOM    152  O   ASP A  39      11.213  -3.646   0.338  1.00 13.75           O  
ATOM    153  N   GLN A  40      11.643  -1.798  -0.975  1.00 11.60           N  
ATOM    154  CA  GLN A  40      11.653  -0.844   0.091  1.00 10.76           C  
ATOM    155  C   GLN A  40      10.266  -0.564   0.559  1.00  8.01           C  
ATOM    156  O   GLN A  40      10.029  -0.224   1.717  1.00  8.96           O  
ATOM    157  N   GLN A  41       9.269  -0.774  -0.318  1.00  6.52           N  
ATOM    158  CA  GLN A  41       7.865  -0.807  -0.049  1.00  3.87           C  
ATOM    159  C   GLN A  41       7.464  -2.017   0.724  1.00  4.79           C  
ATOM    160  O   GLN A  41       7.518  -3.154   0.259  1.00  6.34           O  
ATOM    161  N   ARG A  42       6.903  -1.820   1.930  1.00  5.73           N  
ATOM    162  CA  ARG A  42       6.267  -2.830   2.717  1.00  6.97           C  
ATOM    163  C   ARG A  42       4.970  -2.205   3.099  1.00  7.15           C  
ATOM    164  O   ARG A  42       4.907  -1.320   3.951  1.00  7.33           O  
ATOM    165  N   LEU A  43       3.848  -2.579   2.459  1.00  4.65           N  
ATOM    166  CA  LEU A  43       2.621  -1.959   2.853  1.00  3.51           C  
ATOM    167  C   LEU A  43       1.977  -2.795   3.905  1.00  5.56           C  
ATOM    168  O   LEU A  43       1.701  -3.971   3.671  1.00  4.19           O  
ATOM    169  N   ILE A  44       1.777  -2.265   5.125  1.00  4.58           N  
ATOM    170  CA  ILE A  44       0.819  -2.806   6.038  1.00  5.55           C  
ATOM    171  C   ILE A  44      -0.539  -2.206   5.911  1.00  5.46           C  
ATOM    172  O   ILE A  44      -0.773  -1.274   5.143  1.00  6.04           O  
ATOM    173  N   PHE A  45      -1.500  -2.645   6.743  1.00  6.75           N  
ATOM    174  CA  PHE A  45      -2.815  -2.082   6.763  1.00  4.70           C  
ATOM    175  C   PHE A  45      -2.917  -1.383   8.075  1.00  6.34           C  
ATOM    176  O   PHE A  45      -2.726  -0.169   8.130  1.00  5.45           O  
ATOM    177  N   ALA A  46      -3.131  -2.064   9.214  1.00  6.53           N  
ATOM    178  CA  ALA A  46      -3.112  -1.549  10.548  1.00  7.15           C  
ATOM    179  C   ALA A  46      -1.961  -2.065  11.342  1.00  9.00           C  
ATOM    180  O   ALA A  46      -1.344  -1.258  12.036  1.00 11.15           O  
ATOM    181  N   GLY A  47      -1.724  -3.388  11.388  1.00  9.35           N  
ATOM    182  CA  GLY A  47      -0.606  -4.037  12.000  1.00 11.68           C  
ATOM    183  C   GLY A  47       0.026  -5.044  11.102  1.00 11.14           C  
ATOM    184  O   GLY A  47       1.204  -5.372  11.241  1.00 13.93           O  
ATOM    185  N   LYS A  48      -0.709  -5.597  10.121  1.00 10.47           N  
ATOM    186  CA  LYS A  48      -0.297  -6.739   9.366  1.00  8.82           C  
ATOM    187  C   LYS A  48      -0.037  -6.471   7.924  1.00  7.68           C  
ATOM    188  O   LYS A  48      -0.697  -5.666   7.268  1.00  6.47           O  
ATOM    189  N   GLN A  49       0.943  -7.187   7.345  1.00  8.89           N  
ATOM    190  CA  GLN A  49       1.411  -7.065   5.999  1.00  7.18           C  
ATOM    191  C   GLN A  49       0.561  -7.700   4.954  1.00  8.23           C  
ATOM    192  O   GLN A  49      -0.191  -8.665   5.089  1.00  9.70           O  
ATOM    193  N   LEU A  50       0.675  -7.099   3.756  1.00  6.51           N  
ATOM    194  CA  LEU A  50      -0.085  -7.525   2.622  1.00  7.41           C  
ATOM    195  C   LEU A  50       0.961  -8.037   1.693  1.00  8.27           C  
ATOM    196  O   LEU A  50       2.021  -7.432   1.536  1.00  8.34           O  
ATOM    197  N   GLU A  51       0.774  -9.192   1.030  1.00  9.43           N  
ATOM    198  CA  GLU A  51       1.709  -9.896   0.207  1.00 11.90           C  
ATOM    199  C   GLU A  51       1.342  -9.691  -1.222  1.00 11.49           C  
ATOM    200  O   GLU A  51       0.183  -9.764  -1.629  1.00  9.88           O  
ATOM    201  N   ASP A  52       2.414  -9.492  -2.009  1.00 12.71           N  
ATOM    202  CA  ASP A  52       2.418  -9.290  -3.424  1.00 16.56           C  
ATOM    203  C   ASP A  52       1.375  -9.840  -4.335  1.00 15.83           C  
ATOM    204  O   ASP A  52       0.767  -9.175  -5.172  1.00 17.21           O  
ATOM    205  N   GLY A  53       1.167 -11.168  -4.288  1.00 15.00           N  
ATOM    206  CA  GLY A  53       0.454 -11.910  -5.281  1.00 11.77           C  
ATOM    207  C   GLY A  53      -1.023 -12.033  -5.133  1.00 11.10           C  
ATOM    208  O   GLY A  53      -1.626 -12.644  -6.015  1.00 11.25           O  
ATOM    209  N   ARG A  54      -1.620 -11.478  -4.063  1.00  8.53           N  
ATOM    210  CA  ARG A  54      -3.008 -11.396  -3.727  1.00  9.05           C  
ATOM    211  C   ARG A  54      -3.529 -10.098  -4.241  1.00  8.96           C  
ATOM    212  O   ARG A  54      -2.784  -9.181  -4.583  1.00 11.60           O  
ATOM    213  N   THR A  55      -4.863  -9.926  -4.260  1.00  9.05           N  
ATOM    214  CA  THR A  55      -5.569  -8.737  -4.625  1.00  9.03           C  
ATOM    215  C   THR A  55      -6.044  -7.986  -3.429  1.00  8.15           C  
ATOM    216  O   THR A  55      -6.049  -8.606  -2.366  1.00  5.91           O  
ATOM    217  N   LEU A  56      -6.527  -6.735  -3.522  1.00  6.91           N  
ATOM    218  CA  LEU A  56      -7.135  -5.875  -2.554  1.00  8.29           C  
ATOM    219  C   LEU A  56      -8.429  -6.427  -2.063  1.00  8.05           C  
ATOM    220  O   LEU A  56      -8.890  -6.263  -0.935  1.00 10.17           O  
ATOM    221  N   SER A  57      -9.092  -7.258  -2.887  1.00  8.92           N  
ATOM    222  CA  SER A  57     -10.242  -8.049  -2.577  1.00  9.00           C  
ATOM    223  C   SER A  57     -10.045  -9.030  -1.473  1.00  9.44           C  
ATOM    224  O   SER A  57     -10.854  -9.195  -0.562  1.00 10.91           O  
ATOM    225  N   ASP A  58      -8.902  -9.729  -1.598  1.00  9.11           N  
ATOM    226  CA  ASP A  58      -8.550 -10.793  -0.710  1.00  7.91           C  
ATOM    227  C   ASP A  58      -8.294 -10.263   0.658  1.00  9.12           C  
ATOM    228  O   ASP A  58      -8.660 -10.912   1.637  1.00  8.61           O  
ATOM    229  N   TYR A  59      -7.629  -9.098   0.760  1.00  7.97           N  
ATOM    230  CA  TYR A  59      -7.303  -8.492   2.014  1.00  8.45           C  
ATOM    231  C   TYR A  59      -8.458  -7.678   2.488  1.00 10.98           C  
ATOM    232  O   TYR A  59      -8.461  -7.140   3.594  1.00 12.95           O  
ATOM    233  N   ASN A  60      -9.541  -7.598   1.695  1.00 12.38           N  
ATOM    234  CA  ASN A  60     -10.746  -6.917   2.054  1.00 13.94           C  
ATOM    235  C   ASN A  60     -10.553  -5.448   2.207  1.00 14.16           C  
ATOM    236  O   ASN A  60     -10.956  -4.773   3.154  1.00 14.26           O  
ATOM    237  N   ILE A  61      -9.863  -4.844   1.223  1.00 11.08           N  
ATOM    238  CA  ILE A  61      -9.572  -3.448   1.124  1.00 11.78           C  
ATOM    239  C   ILE A  61     -10.655  -2.749   0.376  1.00 13.74           C  
ATOM    240  O   ILE A  61     -10.982  -3.093  -0.759  1.00 14.60           O  
ATOM    241  N   GLN A  62     -11.428  -1.849   1.009  1.00 13.97           N  
ATOM    242  CA  GLN A  62     -12.570  -1.139   0.524  1.00 15.52           C  
ATOM    243  C   GLN A  62     -12.221   0.228   0.045  1.00 13.94           C  
ATOM    244  O   GLN A  62     -11.131   0.721   0.329  1.00 12.15           O  
ATOM    245  N   LYS A  63     -13.152   0.866  -0.687  1.00 11.73           N  
ATOM    246  CA  LYS A  63     -13.011   2.244  -1.039  1.00 11.97           C  
ATOM    247  C   LYS A  63     -12.816   3.189   0.097  1.00 10.41           C  
ATOM    248  O   LYS A  63     -13.463   3.143   1.142  1.00  9.59           O  
ATOM    249  N   GLU A  64     -11.828   4.076  -0.116  1.00 10.04           N  
ATOM    250  CA  GLU A  64     -11.348   5.034   0.831  1.00 10.94           C  
ATOM    251  C   GLU A  64     -10.919   4.387   2.103  1.00  9.74           C  
ATOM    252  O   GLU A  64     -11.451   4.649   3.181  1.00  9.42           O  
ATOM    253  N   SER A  65      -9.958   3.451   2.017  1.00  6.85           N  
ATOM    254  CA  SER A  65      -9.321   2.817   3.130  1.00  6.90           C  
ATOM    255  C   SER A  65      -7.876   3.181   3.133  1.00  4.72           C  
ATOM    256  O   SER A  65      -7.252   3.259   2.075  1.00  3.91           O  
ATOM    257  N   THR A  66      -7.253   3.390   4.306  1.00  4.48           N  
ATOM    258  CA  THR A  66      -5.868   3.738   4.391  1.00  3.80           C  
ATOM    259  C   THR A  66      -4.941   2.610   4.687  1.00  4.60           C  
ATOM    260  O   THR A  66      -5.073   1.853   5.648  1.00  5.33           O  
ATOM    261  N   LEU A  67      -3.938   2.406   3.814  1.00  4.17           N  
ATOM    262  CA  LEU A  67      -2.823   1.514   3.883  1.00  3.85           C  
ATOM    263  C   LEU A  67      -1.639   2.303   4.325  1.00  3.80           C  
ATOM    264  O   LEU A  67      -1.642   3.527   4.202  1.00  5.54           O  
ATOM    265  N   HIS A  68      -0.608   1.676   4.918  1.00  2.94           N  
ATOM    266  CA  HIS A  68       0.476   2.396   5.510  1.00  4.17           C  
ATOM    267  C   HIS A  68       1.712   1.792   4.939  1.00  5.32           C  
ATOM    268  O   HIS A  68       2.010   0.613   5.124  1.00  7.70           O  
ATOM    269  N   LEU A  69       2.487   2.689   4.303  1.00  5.29           N  
ATOM    270  CA  LEU A  69       3.757   2.378   3.724  1.00  3.97           C  
ATOM    271  C   LEU A  69       4.855   2.513   4.722  1.00  5.07           C  
ATOM    272  O   LEU A  69       5.348   3.614   4.962  1.00  4.34           O  
ATOM    273  N   VAL A  70       5.430   1.414   5.242  1.00  4.29           N  
ATOM    274  CA  VAL A  70       6.625   1.338   6.024  1.00  6.26           C  
ATOM    275  C   VAL A  70       7.781   0.805   5.249  1.00  9.22           C  
ATOM    276  O   VAL A  70       7.612   0.508   4.068  1.00  9.36           O  
TER
ENDMDL
MODEL      9
ATOM      1  N   GLN A   2     -11.144   4.995  -1.798  1.00  9.27           N  
ATOM      2  CA  GLN A   2      -9.949   5.679  -1.411  1.00  9.07           C  
ATOM      3  C   GLN A   2      -9.393   4.999  -0.208  1.00  8.72           C  
ATOM      4  O   GLN A   2     -10.084   4.673   0.756  1.00  8.22           O  
ATOM      5  N   ILE A   3      -8.064   4.795  -0.221  1.00  5.87           N  
ATOM      6  CA  ILE A   3      -7.282   4.440   0.922  1.00  5.07           C  
ATOM      7  C   ILE A   3      -6.136   5.384   1.047  1.00  4.01           C  
ATOM      8  O   ILE A   3      -5.813   6.138   0.130  1.00  4.61           O  
ATOM      9  N   PHE A   4      -5.515   5.314   2.238  1.00  4.55           N  
ATOM     10  CA  PHE A   4      -4.566   6.250   2.756  1.00  4.68           C  
ATOM     11  C   PHE A   4      -3.362   5.445   3.109  1.00  5.30           C  
ATOM     12  O   PHE A   4      -3.352   4.706   4.093  1.00  5.58           O  
ATOM     13  N   VAL A   5      -2.304   5.511   2.282  1.00  4.44           N  
ATOM     14  CA  VAL A   5      -1.061   4.832   2.476  1.00  3.87           C  
ATOM     15  C   VAL A   5      -0.167   5.820   3.144  1.00  4.93           C  
ATOM     16  O   VAL A   5       0.325   6.749   2.506  1.00  6.84           O  
ATOM     17  N   LYS A   6       0.056   5.630   4.456  1.00  6.04           N  
ATOM     18  CA  LYS A   6       0.797   6.575   5.233  1.00  6.12           C  
ATOM     19  C   LYS A   6       2.129   6.012   5.591  1.00  6.57           C  
ATOM     20  O   LYS A   6       2.236   4.923   6.151  1.00  5.76           O  
ATOM     21  N   THR A   7       3.187   6.774   5.260  1.00  7.41           N  
ATOM     22  CA  THR A   7       4.538   6.354   5.469  1.00  7.48           C  
ATOM     23  C   THR A   7       5.056   6.526   6.855  1.00  8.75           C  
ATOM     24  O   THR A   7       4.345   6.948   7.766  1.00  8.58           O  
ATOM     25  N   LEU A   8       6.312   6.187   7.196  1.00  9.84           N  
ATOM     26  CA  LEU A   8       6.853   6.235   8.519  1.00 14.15           C  
ATOM     27  C   LEU A   8       6.992   7.632   9.016  1.00 17.37           C  
ATOM     28  O   LEU A   8       6.636   7.971  10.144  1.00 17.01           O  
ATOM     29  N   THR A   9       7.492   8.476   8.096  1.00 18.33           N  
ATOM     30  CA  THR A   9       7.751   9.865   8.320  1.00 19.24           C  
ATOM     31  C   THR A   9       6.496  10.634   8.089  1.00 19.48           C  
ATOM     32  O   THR A   9       6.287  11.684   8.696  1.00 23.14           O  
ATOM     33  N   GLY A  10       5.512  10.104   7.341  1.00 19.43           N  
ATOM     34  CA  GLY A  10       4.199  10.668   7.321  1.00 18.74           C  
ATOM     35  C   GLY A  10       3.878  11.532   6.150  1.00 17.62           C  
ATOM     36  O   GLY A  10       3.711  12.750   6.198  1.00 19.74           O  
ATOM     37  N   LYS A  11       3.757  10.787   5.037  1.00 13.56           N  
ATOM     38  CA  LYS A  11       3.251  11.215   3.769  1.00 11.91           C  
ATOM     39  C   LYS A  11       2.020  10.417   3.507  1.00 10.18           C  
ATOM     40  O   LYS A  11       2.204   9.201   3.474  1.00  9.10           O  
ATOM     41  N   THR A  12       0.850  11.067   3.376  1.00  9.63           N  
ATOM     42  CA  THR A  12      -0.412  10.449   3.111  1.00  9.85           C  
ATOM     43  C   THR A  12      -0.649  10.362   1.643  1.00 11.66           C  
ATOM     44  O   THR A  12      -0.980  11.323   0.950  1.00 12.33           O  
ATOM     45  N   ILE A  13      -0.465   9.133   1.127  1.00 10.42           N  
ATOM     46  CA  ILE A  13      -0.554   8.737  -0.244  1.00 11.84           C  
ATOM     47  C   ILE A  13      -1.897   8.208  -0.613  1.00 10.55           C  
ATOM     48  O   ILE A  13      -2.225   7.115  -0.154  1.00 11.92           O  
ATOM     49  N   THR A  14      -2.787   9.005  -1.231  1.00  9.39           N  
ATOM     50  CA  THR A  14      -4.088   8.526  -1.584  1.00  9.63           C  
ATOM     51  C   THR A  14      -4.071   7.591  -2.744  1.00 11.20           C  
ATOM     52  O   THR A  14      -3.643   8.014  -3.816  1.00 11.63           O  
ATOM     53  N   LEU A  15      -4.540   6.330  -2.734  1.00  8.29           N  
ATOM     54  CA  LEU A  15      -4.596   5.515  -3.907  1.00  9.03           C  
ATOM     55  C   LEU A  15      -6.061   5.338  -4.117  1.00  8.59           C  
ATOM     56  O   LEU A  15      -6.803   5.231  -3.142  1.00  7.79           O  
ATOM     57  N   GLU A  16      -6.519   5.220  -5.376  1.00 11.04           N  
ATOM     58  CA  GLU A  16      -7.831   4.726  -5.659  1.00 11.50           C  
ATOM     59  C   GLU A  16      -7.703   3.335  -6.177  1.00 10.13           C  
ATOM     60  O   GLU A  16      -6.823   2.973  -6.956  1.00  9.83           O  
ATOM     61  N   VAL A  17      -8.586   2.483  -5.625  1.00  8.99           N  
ATOM     62  CA  VAL A  17      -8.754   1.079  -5.840  1.00  8.85           C  
ATOM     63  C   VAL A  17     -10.206   0.805  -5.644  1.00  8.04           C  
ATOM     64  O   VAL A  17     -10.976   1.730  -5.389  1.00  8.99           O  
ATOM     65  N   GLU A  18     -10.623  -0.473  -5.679  1.00  7.29           N  
ATOM     66  CA  GLU A  18     -11.910  -0.988  -5.329  1.00  7.08           C  
ATOM     67  C   GLU A  18     -11.717  -2.292  -4.634  1.00  6.45           C  
ATOM     68  O   GLU A  18     -10.649  -2.852  -4.877  1.00  5.28           O  
ATOM     69  N   PRO A  19     -12.607  -2.893  -3.902  1.00  7.24           N  
ATOM     70  CA  PRO A  19     -12.400  -4.026  -3.048  1.00  7.07           C  
ATOM     71  C   PRO A  19     -11.933  -5.296  -3.671  1.00  6.65           C  
ATOM     72  O   PRO A  19     -11.434  -6.160  -2.952  1.00  6.37           O  
ATOM     73  N   SER A  20     -12.154  -5.527  -4.977  1.00  6.80           N  
ATOM     74  CA  SER A  20     -11.846  -6.711  -5.717  1.00  6.28           C  
ATOM     75  C   SER A  20     -10.517  -6.587  -6.379  1.00  8.45           C  
ATOM     76  O   SER A  20      -9.918  -7.512  -6.926  1.00  7.26           O  
ATOM     77  N   ASP A  21      -9.871  -5.409  -6.314  1.00  7.50           N  
ATOM     78  CA  ASP A  21      -8.488  -5.360  -6.673  1.00  7.70           C  
ATOM     79  C   ASP A  21      -7.550  -5.931  -5.665  1.00  7.08           C  
ATOM     80  O   ASP A  21      -7.931  -6.147  -4.515  1.00  8.11           O  
ATOM     81  N   THR A  22      -6.276  -6.164  -6.028  1.00  5.37           N  
ATOM     82  CA  THR A  22      -5.245  -6.692  -5.189  1.00  6.01           C  
ATOM     83  C   THR A  22      -4.418  -5.736  -4.400  1.00  8.01           C  
ATOM     84  O   THR A  22      -4.447  -4.524  -4.610  1.00  8.11           O  
ATOM     85  N   ILE A  23      -3.596  -6.252  -3.469  1.00  8.32           N  
ATOM     86  CA  ILE A  23      -2.823  -5.336  -2.689  1.00  9.92           C  
ATOM     87  C   ILE A  23      -1.552  -5.053  -3.413  1.00 10.01           C  
ATOM     88  O   ILE A  23      -0.857  -4.080  -3.125  1.00  8.71           O  
ATOM     89  N   GLU A  24      -1.246  -5.862  -4.443  1.00  9.54           N  
ATOM     90  CA  GLU A  24      -0.315  -5.550  -5.483  1.00 11.81           C  
ATOM     91  C   GLU A  24      -0.670  -4.324  -6.252  1.00 11.14           C  
ATOM     92  O   GLU A  24       0.148  -3.436  -6.488  1.00 10.62           O  
ATOM     93  N   ASN A  25      -1.928  -4.162  -6.698  1.00  9.43           N  
ATOM     94  CA  ASN A  25      -2.425  -3.014  -7.391  1.00 10.96           C  
ATOM     95  C   ASN A  25      -2.258  -1.706  -6.697  1.00  9.68           C  
ATOM     96  O   ASN A  25      -1.867  -0.668  -7.228  1.00  9.33           O  
ATOM     97  N   VAL A  26      -2.480  -1.671  -5.371  1.00  6.52           N  
ATOM     98  CA  VAL A  26      -2.133  -0.593  -4.498  1.00  5.53           C  
ATOM     99  C   VAL A  26      -0.705  -0.184  -4.609  1.00  4.42           C  
ATOM    100  O   VAL A  26      -0.433   0.978  -4.904  1.00  3.40           O  
ATOM    101  N   LYS A  27       0.237  -1.129  -4.437  1.00  2.64           N  
ATOM    102  CA  LYS A  27       1.642  -0.958  -4.647  1.00  4.14           C  
ATOM    103  C   LYS A  27       2.030  -0.597  -6.039  1.00  5.58           C  
ATOM    104  O   LYS A  27       3.038   0.082  -6.230  1.00  4.11           O  
ATOM    105  N   ALA A  28       1.326  -0.990  -7.116  1.00  6.61           N  
ATOM    106  CA  ALA A  28       1.378  -0.544  -8.473  1.00  7.74           C  
ATOM    107  C   ALA A  28       0.928   0.863  -8.666  1.00  9.17           C  
ATOM    108  O   ALA A  28       1.457   1.552  -9.537  1.00 11.45           O  
ATOM    109  N   LYS A  29      -0.001   1.380  -7.842  1.00  8.96           N  
ATOM    110  CA  LYS A  29      -0.329   2.759  -8.027  1.00  7.90           C  
ATOM    111  C   LYS A  29       0.487   3.653  -7.157  1.00  6.92           C  
ATOM    112  O   LYS A  29       0.602   4.845  -7.436  1.00  6.87           O  
ATOM    113  N   ILE A  30       1.154   3.055  -6.154  1.00  4.57           N  
ATOM    114  CA  ILE A  30       2.298   3.633  -5.520  1.00  5.58           C  
ATOM    115  C   ILE A  30       3.478   3.802  -6.414  1.00  7.26           C  
ATOM    116  O   ILE A  30       4.250   4.757  -6.343  1.00  9.46           O  
ATOM    117  N   GLN A  31       3.722   2.868  -7.350  1.00  7.06           N  
ATOM    118  CA  GLN A  31       4.712   2.943  -8.380  1.00  8.67           C  
ATOM    119  C   GLN A  31       4.485   3.971  -9.434  1.00 10.90           C  
ATOM    120  O   GLN A  31       5.363   4.325 -10.218  1.00  9.63           O  
ATOM    121  N   ASP A  32       3.218   4.399  -9.582  1.00 10.93           N  
ATOM    122  CA  ASP A  32       2.789   5.315 -10.592  1.00 14.01           C  
ATOM    123  C   ASP A  32       3.079   6.656 -10.012  1.00 14.04           C  
ATOM    124  O   ASP A  32       3.876   7.440 -10.525  1.00 13.39           O  
ATOM    125  N   LYS A  33       2.483   6.948  -8.842  1.00 14.22           N  
ATOM    126  CA  LYS A  33       2.639   8.122  -8.041  1.00 14.00           C  
ATOM    127  C   LYS A  33       3.993   8.337  -7.459  1.00 12.37           C  
ATOM    128  O   LYS A  33       4.580   9.386  -7.721  1.00 12.17           O  
ATOM    129  N   GLU A  34       4.530   7.457  -6.594  1.00 10.11           N  
ATOM    130  CA  GLU A  34       5.812   7.717  -6.017  1.00 10.07           C  
ATOM    131  C   GLU A  34       6.919   7.345  -6.942  1.00  9.32           C  
ATOM    132  O   GLU A  34       7.753   8.193  -7.254  1.00 11.61           O  
ATOM    133  N   GLY A  35       6.972   6.069  -7.365  1.00  7.22           N  
ATOM    134  CA  GLY A  35       7.953   5.551  -8.268  1.00  6.29           C  
ATOM    135  C   GLY A  35       8.669   4.420  -7.614  1.00  6.93           C  
ATOM    136  O   GLY A  35       9.773   4.035  -7.996  1.00  7.41           O  
ATOM    137  N   ILE A  36       8.078   3.868  -6.539  1.00  5.86           N  
ATOM    138  CA  ILE A  36       8.687   2.844  -5.747  1.00  6.07           C  
ATOM    139  C   ILE A  36       8.302   1.512  -6.293  1.00  6.36           C  
ATOM    140  O   ILE A  36       7.101   1.355  -6.505  1.00  6.18           O  
ATOM    141  N   PRO A  37       9.121   0.536  -6.549  1.00  8.65           N  
ATOM    142  CA  PRO A  37       8.699  -0.728  -7.081  1.00  9.18           C  
ATOM    143  C   PRO A  37       7.840  -1.569  -6.201  1.00  9.85           C  
ATOM    144  O   PRO A  37       7.864  -1.365  -4.988  1.00  8.51           O  
ATOM    145  N   PRO A  38       7.023  -2.495  -6.608  1.00  8.71           N  
ATOM    146  CA  PRO A  38       6.139  -3.229  -5.750  1.00  9.08           C  
ATOM    147  C   PRO A  38       6.872  -4.147  -4.835  1.00  9.28           C  
ATOM    148  O   PRO A  38       6.323  -4.578  -3.821  1.00  6.50           O  
ATOM    149  N   ASP A  39       8.107  -4.566  -5.165  1.00 11.20           N  
ATOM    150  CA  ASP A  39       8.912  -5.578  -4.555  1.00 14.96           C  
ATOM    151  C   ASP A  39       9.501  -5.004  -3.312  1.00 13.99           C  
ATOM    152  O   ASP A  39       9.653  -5.660  -2.283  1.00 13.75           O  
ATOM    153  N   GLN A  40       9.701  -3.674  -3.302  1.00 11.60           N  
ATOM    154  CA  GLN A  40      10.322  -2.945  -2.241  1.00 10.76           C  
ATOM    155  C   GLN A  40       9.450  -2.921  -1.033  1.00  8.01           C  
ATOM    156  O   GLN A  40       9.939  -2.832   0.092  1.00  8.96           O  
ATOM    157  N   GLN A  41       8.123  -2.854  -1.244  1.00  6.52           N  
ATOM    158  CA  GLN A  41       7.207  -2.261  -0.320  1.00  3.87           C  
ATOM    159  C   GLN A  41       6.578  -3.284   0.562  1.00  4.79           C  
ATOM    160  O   GLN A  41       6.115  -4.297   0.040  1.00  6.34           O  
ATOM    161  N   ARG A  42       6.543  -2.992   1.874  1.00  5.73           N  
ATOM    162  CA  ARG A  42       5.885  -3.828   2.830  1.00  6.97           C  
ATOM    163  C   ARG A  42       4.724  -3.002   3.265  1.00  7.15           C  
ATOM    164  O   ARG A  42       4.869  -1.806   3.513  1.00  7.33           O  
ATOM    165  N   LEU A  43       3.507  -3.573   3.297  1.00  4.65           N  
ATOM    166  CA  LEU A  43       2.407  -2.890   3.904  1.00  3.51           C  
ATOM    167  C   LEU A  43       1.899  -3.650   5.081  1.00  5.56           C  
ATOM    168  O   LEU A  43       1.544  -4.826   5.022  1.00  4.19           O  
ATOM    169  N   ILE A  44       1.865  -2.927   6.214  1.00  4.58           N  
ATOM    170  CA  ILE A  44       1.257  -3.291   7.456  1.00  5.55           C  
ATOM    171  C   ILE A  44      -0.127  -2.770   7.637  1.00  5.46           C  
ATOM    172  O   ILE A  44      -0.448  -1.624   7.326  1.00  6.04           O  
ATOM    173  N   PHE A  45      -1.086  -3.612   8.060  1.00  6.75           N  
ATOM    174  CA  PHE A  45      -2.419  -3.226   8.406  1.00  4.70           C  
ATOM    175  C   PHE A  45      -2.701  -3.655   9.805  1.00  6.34           C  
ATOM    176  O   PHE A  45      -2.639  -4.834  10.150  1.00  5.45           O  
ATOM    177  N   ALA A  46      -2.926  -2.658  10.679  1.00  6.53           N  
ATOM    178  CA  ALA A  46      -3.048  -2.871  12.088  1.00  7.15           C  
ATOM    179  C   ALA A  46      -1.721  -3.225  12.667  1.00  9.00           C  
ATOM    180  O   ALA A  46      -0.829  -2.378  12.693  1.00 11.15           O  
ATOM    181  N   GLY A  47      -1.417  -4.496  12.981  1.00  9.35           N  
ATOM    182  CA  GLY A  47      -0.090  -4.967  13.232  1.00 11.68           C  
ATOM    183  C   GLY A  47       0.213  -6.251  12.540  1.00 11.14           C  
ATOM    184  O   GLY A  47       1.097  -7.018  12.919  1.00 13.93           O  
ATOM    185  N   LYS A  48      -0.396  -6.354  11.346  1.00 10.47           N  
ATOM    186  CA  LYS A  48      -0.264  -7.494  10.494  1.00  8.82           C  
ATOM    187  C   LYS A  48       0.311  -7.215   9.147  1.00  7.68           C  
ATOM    188  O   LYS A  48      -0.011  -6.177   8.571  1.00  6.47           O  
ATOM    189  N   GLN A  49       1.121  -8.126   8.580  1.00  8.89           N  
ATOM    190  CA  GLN A  49       1.536  -7.981   7.219  1.00  7.18           C  
ATOM    191  C   GLN A  49       0.521  -8.456   6.238  1.00  8.23           C  
ATOM    192  O   GLN A  49      -0.085  -9.521   6.343  1.00  9.70           O  
ATOM    193  N   LEU A  50       0.358  -7.605   5.209  1.00  6.51           N  
ATOM    194  CA  LEU A  50      -0.496  -7.893   4.099  1.00  7.41           C  
ATOM    195  C   LEU A  50       0.370  -8.607   3.119  1.00  8.27           C  
ATOM    196  O   LEU A  50       1.547  -8.322   2.906  1.00  8.34           O  
ATOM    197  N   GLU A  51      -0.234  -9.563   2.391  1.00  9.43           N  
ATOM    198  CA  GLU A  51       0.217 -10.093   1.142  1.00 11.90           C  
ATOM    199  C   GLU A  51      -0.243  -9.331  -0.052  1.00 11.49           C  
ATOM    200  O   GLU A  51      -1.241  -8.635   0.128  1.00  9.88           O  
ATOM    201  N   ASP A  52       0.402  -9.474  -1.224  1.00 12.71           N  
ATOM    202  CA  ASP A  52       0.106  -8.712  -2.397  1.00 16.56           C  
ATOM    203  C   ASP A  52      -0.963  -9.216  -3.304  1.00 15.83           C  
ATOM    204  O   ASP A  52      -1.806  -8.466  -3.794  1.00 17.21           O  
ATOM    205  N   GLY A  53      -0.921 -10.548  -3.487  1.00 15.00           N  
ATOM    206  CA  GLY A  53      -1.778 -11.085  -4.498  1.00 11.77           C  
ATOM    207  C   GLY A  53      -3.026 -11.574  -3.848  1.00 11.10           C  
ATOM    208  O   GLY A  53      -3.800 -12.391  -4.344  1.00 11.25           O  
ATOM    209  N   ARG A  54      -3.311 -11.131  -2.611  1.00  8.53           N  
ATOM    210  CA  ARG A  54      -4.605 -11.194  -2.006  1.00  9.05           C  
ATOM    211  C   ARG A  54      -5.367  -9.950  -2.312  1.00  8.96           C  
ATOM    212  O   ARG A  54      -4.766  -8.957  -2.721  1.00 11.60           O  
ATOM    213  N   THR A  55      -6.693  -9.862  -2.107  1.00  9.05           N  
ATOM    214  CA  THR A  55      -7.420  -8.684  -2.466  1.00  9.03           C  
ATOM    215  C   THR A  55      -7.627  -7.976  -1.171  1.00  8.15           C  
ATOM    216  O   THR A  55      -7.488  -8.446  -0.043  1.00  5.91           O  
ATOM    217  N   LEU A  56      -8.196  -6.767  -1.320  1.00  6.91           N  
ATOM    218  CA  LEU A  56      -8.566  -5.823  -0.312  1.00  8.29           C  
ATOM    219  C   LEU A  56      -9.685  -6.371   0.506  1.00  8.05           C  
ATOM    220  O   LEU A  56      -9.684  -6.291   1.733  1.00 10.17           O  
ATOM    221  N   SER A  57     -10.613  -7.086  -0.155  1.00  8.92           N  
ATOM    222  CA  SER A  57     -11.714  -7.738   0.484  1.00  9.00           C  
ATOM    223  C   SER A  57     -11.293  -8.779   1.463  1.00  9.44           C  
ATOM    224  O   SER A  57     -11.862  -8.921   2.544  1.00 10.91           O  
ATOM    225  N   ASP A  58     -10.285  -9.577   1.069  1.00  9.11           N  
ATOM    226  CA  ASP A  58      -9.836 -10.618   1.942  1.00  7.91           C  
ATOM    227  C   ASP A  58      -9.448 -10.326   3.350  1.00  9.12           C  
ATOM    228  O   ASP A  58      -9.841 -11.111   4.211  1.00  8.61           O  
ATOM    229  N   TYR A  59      -8.677  -9.245   3.566  1.00  7.97           N  
ATOM    230  CA  TYR A  59      -8.446  -8.630   4.836  1.00  8.45           C  
ATOM    231  C   TYR A  59      -9.531  -7.737   5.333  1.00 10.98           C  
ATOM    232  O   TYR A  59      -9.512  -7.362   6.504  1.00 12.95           O  
ATOM    233  N   ASN A  60     -10.487  -7.291   4.498  1.00 12.38           N  
ATOM    234  CA  ASN A  60     -11.472  -6.282   4.735  1.00 13.94           C  
ATOM    235  C   ASN A  60     -10.826  -4.943   4.839  1.00 14.16           C  
ATOM    236  O   ASN A  60     -10.869  -4.301   5.887  1.00 14.26           O  
ATOM    237  N   ILE A  61     -10.349  -4.424   3.693  1.00 11.08           N  
ATOM    238  CA  ILE A  61      -9.846  -3.093   3.840  1.00 11.78           C  
ATOM    239  C   ILE A  61     -10.758  -2.126   3.166  1.00 13.74           C  
ATOM    240  O   ILE A  61     -11.001  -2.158   1.961  1.00 14.60           O  
ATOM    241  N   GLN A  62     -11.361  -1.279   4.020  1.00 13.97           N  
ATOM    242  CA  GLN A  62     -12.406  -0.396   3.606  1.00 15.52           C  
ATOM    243  C   GLN A  62     -12.027   1.022   3.345  1.00 13.94           C  
ATOM    244  O   GLN A  62     -10.854   1.376   3.246  1.00 12.15           O  
ATOM    245  N   LYS A  63     -13.048   1.891   3.237  1.00 11.73           N  
ATOM    246  CA  LYS A  63     -12.867   3.245   2.815  1.00 11.97           C  
ATOM    247  C   LYS A  63     -12.110   4.050   3.815  1.00 10.41           C  
ATOM    248  O   LYS A  63     -12.287   3.969   5.029  1.00  9.59           O  
ATOM    249  N   GLU A  64     -11.157   4.902   3.399  1.00 10.04           N  
ATOM    250  CA  GLU A  64     -10.432   5.754   4.291  1.00 10.94           C  
ATOM    251  C   GLU A  64      -9.411   5.132   5.181  1.00  9.74           C  
ATOM    252  O   GLU A  64      -8.994   5.809   6.120  1.00  9.42           O  
ATOM    253  N   SER A  65      -9.063   3.861   4.913  1.00  6.85           N  
ATOM    254  CA  SER A  65      -8.331   3.097   5.876  1.00  6.90           C  
ATOM    255  C   SER A  65      -6.877   3.360   5.689  1.00  4.72           C  
ATOM    256  O   SER A  65      -6.336   3.372   4.584  1.00  3.91           O  
ATOM    257  N   THR A  66      -6.213   3.518   6.848  1.00  4.48           N  
ATOM    258  CA  THR A  66      -4.816   3.824   6.882  1.00  3.80           C  
ATOM    259  C   THR A  66      -3.971   2.597   6.844  1.00  4.60           C  
ATOM    260  O   THR A  66      -4.001   1.742   7.728  1.00  5.33           O  
ATOM    261  N   LEU A  67      -3.187   2.432   5.764  1.00  4.17           N  
ATOM    262  CA  LEU A  67      -2.146   1.455   5.690  1.00  3.85           C  
ATOM    263  C   LEU A  67      -0.857   2.073   6.113  1.00  3.80           C  
ATOM    264  O   LEU A  67      -0.670   3.282   5.982  1.00  5.54           O  
ATOM    265  N   HIS A  68      -0.010   1.203   6.689  1.00  2.94           N  
ATOM    266  CA  HIS A  68       1.316   1.489   7.143  1.00  4.17           C  
ATOM    267  C   HIS A  68       2.310   1.029   6.133  1.00  5.32           C  
ATOM    268  O   HIS A  68       2.371  -0.162   5.831  1.00  7.70           O  
ATOM    269  N   LEU A  69       2.945   2.020   5.481  1.00  5.29           N  
ATOM    270  CA  LEU A  69       3.952   1.743   4.505  1.00  3.97           C  
ATOM    271  C   LEU A  69       5.306   1.827   5.121  1.00  5.07           C  
ATOM    272  O   LEU A  69       5.757   2.805   5.715  1.00  4.34           O  
ATOM    273  N   VAL A  70       6.009   0.680   5.105  1.00  4.29           N  
ATOM    274  CA  VAL A  70       7.408   0.488   5.328  1.00  6.26           C  
ATOM    275  C   VAL A  70       8.057   0.537   3.987  1.00  9.22           C  
ATOM    276  O   VAL A  70       7.739  -0.248   3.094  1.00  9.36           O  
TER
ENDMDL
MODEL      10
ATOM      1  N   GLN A   2     -10.544   5.813  -1.867  1.00  9.27           N  
ATOM      2  CA  GLN A   2      -9.282   6.327  -1.432  1.00  9.07           C  
ATOM      3  C   GLN A   2      -8.654   5.569  -0.314  1.00  8.72           C  
ATOM      4  O   GLN A   2      -9.328   5.379   0.698  1.00  8.22           O  
ATOM      5  N   ILE A   3      -7.412   5.056  -0.355  1.00  5.87           N  
ATOM      6  CA  ILE A   3      -6.746   4.569   0.813  1.00  5.07           C  
ATOM      7  C   ILE A   3      -5.602   5.503   1.004  1.00  4.01           C  
ATOM      8  O   ILE A   3      -5.068   6.103   0.073  1.00  4.61           O  
ATOM      9  N   PHE A   4      -5.071   5.370   2.233  1.00  4.55           N  
ATOM     10  CA  PHE A   4      -3.803   5.958   2.533  1.00  4.68           C  
ATOM     11  C   PHE A   4      -2.724   4.935   2.633  1.00  5.30           C  
ATOM     12  O   PHE A   4      -2.901   3.964   3.367  1.00  5.58           O  
ATOM     13  N   VAL A   5      -1.547   5.260   2.069  1.00  4.44           N  
ATOM     14  CA  VAL A   5      -0.284   4.611   2.235  1.00  3.87           C  
ATOM     15  C   VAL A   5       0.622   5.634   2.828  1.00  4.93           C  
ATOM     16  O   VAL A   5       1.197   6.541   2.229  1.00  6.84           O  
ATOM     17  N   LYS A   6       0.854   5.485   4.144  1.00  6.04           N  
ATOM     18  CA  LYS A   6       1.704   6.354   4.898  1.00  6.12           C  
ATOM     19  C   LYS A   6       3.118   5.883   4.865  1.00  6.57           C  
ATOM     20  O   LYS A   6       3.309   4.679   5.027  1.00  5.76           O  
ATOM     21  N   THR A   7       4.171   6.692   4.653  1.00  7.41           N  
ATOM     22  CA  THR A   7       5.530   6.282   4.828  1.00  7.48           C  
ATOM     23  C   THR A   7       6.009   6.319   6.239  1.00  8.75           C  
ATOM     24  O   THR A   7       5.145   6.479   7.100  1.00  8.58           O  
ATOM     25  N   LEU A   8       7.318   6.140   6.487  1.00  9.84           N  
ATOM     26  CA  LEU A   8       7.816   5.988   7.819  1.00 14.15           C  
ATOM     27  C   LEU A   8       8.421   7.238   8.358  1.00 17.37           C  
ATOM     28  O   LEU A   8       8.293   7.628   9.517  1.00 17.01           O  
ATOM     29  N   THR A   9       8.947   8.098   7.467  1.00 18.33           N  
ATOM     30  CA  THR A   9       9.230   9.487   7.656  1.00 19.24           C  
ATOM     31  C   THR A   9       7.927  10.202   7.761  1.00 19.48           C  
ATOM     32  O   THR A   9       7.749  11.125   8.554  1.00 23.14           O  
ATOM     33  N   GLY A  10       6.916   9.875   6.937  1.00 19.43           N  
ATOM     34  CA  GLY A  10       5.597  10.413   7.062  1.00 18.74           C  
ATOM     35  C   GLY A  10       5.168  11.350   5.986  1.00 17.62           C  
ATOM     36  O   GLY A  10       5.047  12.554   6.207  1.00 19.74           O  
ATOM     37  N   LYS A  11       4.913  10.779   4.795  1.00 13.56           N  
ATOM     38  CA  LYS A  11       4.132  11.388   3.763  1.00 11.91           C  
ATOM     39  C   LYS A  11       3.010  10.482   3.389  1.00 10.18           C  
ATOM     40  O   LYS A  11       3.286   9.286   3.304  1.00  9.10           O  
ATOM     41  N   THR A  12       1.795  11.047   3.280  1.00  9.63           N  
ATOM     42  CA  THR A  12       0.574  10.317   3.132  1.00  9.85           C  
ATOM     43  C   THR A  12       0.253  10.182   1.683  1.00 11.66           C  
ATOM     44  O   THR A  12      -0.176  11.087   0.969  1.00 12.33           O  
ATOM     45  N   ILE A  13       0.455   8.985   1.104  1.00 10.42           N  
ATOM     46  CA  ILE A  13       0.154   8.756  -0.275  1.00 11.84           C  
ATOM     47  C   ILE A  13      -1.206   8.165  -0.415  1.00 10.55           C  
ATOM     48  O   ILE A  13      -1.697   7.189   0.150  1.00 11.92           O  
ATOM     49  N   THR A  14      -2.040   8.940  -1.131  1.00  9.39           N  
ATOM     50  CA  THR A  14      -3.421   8.609  -1.301  1.00  9.63           C  
ATOM     51  C   THR A  14      -3.689   7.915  -2.592  1.00 11.20           C  
ATOM     52  O   THR A  14      -3.759   8.559  -3.637  1.00 11.63           O  
ATOM     53  N   LEU A  15      -3.883   6.584  -2.625  1.00  8.29           N  
ATOM     54  CA  LEU A  15      -4.142   5.831  -3.812  1.00  9.03           C  
ATOM     55  C   LEU A  15      -5.607   5.738  -4.066  1.00  8.59           C  
ATOM     56  O   LEU A  15      -6.425   5.406  -3.210  1.00  7.79           O  
ATOM     57  N   GLU A  16      -5.993   6.075  -5.310  1.00 11.04           N  
ATOM     58  CA  GLU A  16      -7.369   5.969  -5.682  1.00 11.50           C  
ATOM     59  C   GLU A  16      -7.518   4.674  -6.404  1.00 10.13           C  
ATOM     60  O   GLU A  16      -7.259   4.448  -7.585  1.00  9.83           O  
ATOM     61  N   VAL A  17      -7.860   3.625  -5.635  1.00  8.99           N  
ATOM     62  CA  VAL A  17      -7.974   2.233  -5.944  1.00  8.85           C  
ATOM     63  C   VAL A  17      -9.408   1.859  -6.096  1.00  8.04           C  
ATOM     64  O   VAL A  17     -10.294   2.663  -5.810  1.00  8.99           O  
ATOM     65  N   GLU A  18      -9.675   0.606  -6.505  1.00  7.29           N  
ATOM     66  CA  GLU A  18     -10.966   0.007  -6.365  1.00  7.08           C  
ATOM     67  C   GLU A  18     -10.778  -1.128  -5.419  1.00  6.45           C  
ATOM     68  O   GLU A  18      -9.671  -1.653  -5.525  1.00  5.28           O  
ATOM     69  N   PRO A  19     -11.651  -1.449  -4.510  1.00  7.24           N  
ATOM     70  CA  PRO A  19     -11.470  -2.531  -3.586  1.00  7.07           C  
ATOM     71  C   PRO A  19     -11.213  -3.908  -4.096  1.00  6.65           C  
ATOM     72  O   PRO A  19     -10.773  -4.842  -3.428  1.00  6.37           O  
ATOM     73  N   SER A  20     -11.506  -4.087  -5.396  1.00  6.80           N  
ATOM     74  CA  SER A  20     -11.268  -5.277  -6.152  1.00  6.28           C  
ATOM     75  C   SER A  20      -9.861  -5.356  -6.637  1.00  8.45           C  
ATOM     76  O   SER A  20      -9.360  -6.365  -7.132  1.00  7.26           O  
ATOM     77  N   ASP A  21      -9.064  -4.278  -6.532  1.00  7.50           N  
ATOM     78  CA  ASP A  21      -7.667  -4.311  -6.837  1.00  7.70           C  
ATOM     79  C   ASP A  21      -6.755  -4.984  -5.870  1.00  7.08           C  
ATOM     80  O   ASP A  21      -6.964  -5.019  -4.659  1.00  8.11           O  
ATOM     81  N   THR A  22      -5.752  -5.659  -6.459  1.00  5.37           N  
ATOM     82  CA  THR A  22      -4.873  -6.522  -5.733  1.00  6.01           C  
ATOM     83  C   THR A  22      -3.690  -5.726  -5.300  1.00  8.01           C  
ATOM     84  O   THR A  22      -3.260  -4.754  -5.918  1.00  8.11           O  
ATOM     85  N   ILE A  23      -3.090  -6.172  -4.181  1.00  8.32           N  
ATOM     86  CA  ILE A  23      -1.936  -5.542  -3.617  1.00  9.92           C  
ATOM     87  C   ILE A  23      -0.745  -5.432  -4.504  1.00 10.01           C  
ATOM     88  O   ILE A  23      -0.084  -4.400  -4.405  1.00  8.71           O  
ATOM     89  N   GLU A  24      -0.562  -6.327  -5.491  1.00  9.54           N  
ATOM     90  CA  GLU A  24       0.391  -6.132  -6.540  1.00 11.81           C  
ATOM     91  C   GLU A  24       0.126  -4.973  -7.437  1.00 11.14           C  
ATOM     92  O   GLU A  24       0.987  -4.162  -7.774  1.00 10.62           O  
ATOM     93  N   ASN A  25      -1.117  -4.759  -7.906  1.00  9.43           N  
ATOM     94  CA  ASN A  25      -1.446  -3.658  -8.757  1.00 10.96           C  
ATOM     95  C   ASN A  25      -1.471  -2.353  -8.039  1.00  9.68           C  
ATOM     96  O   ASN A  25      -1.251  -1.261  -8.562  1.00  9.33           O  
ATOM     97  N   VAL A  26      -1.794  -2.380  -6.734  1.00  6.52           N  
ATOM     98  CA  VAL A  26      -1.838  -1.234  -5.880  1.00  5.53           C  
ATOM     99  C   VAL A  26      -0.439  -0.741  -5.739  1.00  4.42           C  
ATOM    100  O   VAL A  26      -0.215   0.444  -5.981  1.00  3.40           O  
ATOM    101  N   LYS A  27       0.528  -1.636  -5.472  1.00  2.64           N  
ATOM    102  CA  LYS A  27       1.935  -1.380  -5.478  1.00  4.14           C  
ATOM    103  C   LYS A  27       2.484  -0.915  -6.783  1.00  5.58           C  
ATOM    104  O   LYS A  27       3.572  -0.343  -6.822  1.00  4.11           O  
ATOM    105  N   ALA A  28       1.809  -1.092  -7.933  1.00  6.61           N  
ATOM    106  CA  ALA A  28       2.177  -0.492  -9.178  1.00  7.74           C  
ATOM    107  C   ALA A  28       1.729   0.926  -9.273  1.00  9.17           C  
ATOM    108  O   ALA A  28       2.312   1.773  -9.948  1.00 11.45           O  
ATOM    109  N   LYS A  29       0.692   1.373  -8.543  1.00  8.96           N  
ATOM    110  CA  LYS A  29       0.169   2.703  -8.510  1.00  7.90           C  
ATOM    111  C   LYS A  29       1.063   3.519  -7.641  1.00  6.92           C  
ATOM    112  O   LYS A  29       1.327   4.656  -8.029  1.00  6.87           O  
ATOM    113  N   ILE A  30       1.594   2.907  -6.568  1.00  4.57           N  
ATOM    114  CA  ILE A  30       2.550   3.500  -5.684  1.00  5.58           C  
ATOM    115  C   ILE A  30       3.856   3.655  -6.383  1.00  7.26           C  
ATOM    116  O   ILE A  30       4.461   4.720  -6.265  1.00  9.46           O  
ATOM    117  N   GLN A  31       4.290   2.717  -7.244  1.00  7.06           N  
ATOM    118  CA  GLN A  31       5.249   2.929  -8.283  1.00  8.67           C  
ATOM    119  C   GLN A  31       4.910   4.038  -9.219  1.00 10.90           C  
ATOM    120  O   GLN A  31       5.732   4.943  -9.352  1.00  9.63           O  
ATOM    121  N   ASP A  32       3.734   4.119  -9.868  1.00 10.93           N  
ATOM    122  CA  ASP A  32       3.482   5.206 -10.761  1.00 14.01           C  
ATOM    123  C   ASP A  32       3.421   6.567 -10.158  1.00 14.04           C  
ATOM    124  O   ASP A  32       3.912   7.524 -10.754  1.00 13.39           O  
ATOM    125  N   LYS A  33       2.989   6.690  -8.890  1.00 14.22           N  
ATOM    126  CA  LYS A  33       3.079   7.855  -8.065  1.00 14.00           C  
ATOM    127  C   LYS A  33       4.476   8.305  -7.808  1.00 12.37           C  
ATOM    128  O   LYS A  33       4.962   9.389  -8.127  1.00 12.17           O  
ATOM    129  N   GLU A  34       5.207   7.461  -7.058  1.00 10.11           N  
ATOM    130  CA  GLU A  34       6.392   7.825  -6.346  1.00 10.07           C  
ATOM    131  C   GLU A  34       7.642   7.526  -7.099  1.00  9.32           C  
ATOM    132  O   GLU A  34       8.466   8.399  -7.369  1.00 11.61           O  
ATOM    133  N   GLY A  35       7.682   6.283  -7.610  1.00  7.22           N  
ATOM    134  CA  GLY A  35       8.868   5.772  -8.226  1.00  6.29           C  
ATOM    135  C   GLY A  35       9.489   4.630  -7.497  1.00  6.93           C  
ATOM    136  O   GLY A  35      10.665   4.344  -7.711  1.00  7.41           O  
ATOM    137  N   ILE A  36       8.752   4.054  -6.530  1.00  5.86           N  
ATOM    138  CA  ILE A  36       9.212   2.999  -5.682  1.00  6.07           C  
ATOM    139  C   ILE A  36       8.734   1.709  -6.256  1.00  6.36           C  
ATOM    140  O   ILE A  36       7.525   1.492  -6.310  1.00  6.18           O  
ATOM    141  N   PRO A  37       9.493   0.779  -6.757  1.00  8.65           N  
ATOM    142  CA  PRO A  37       8.994  -0.349  -7.487  1.00  9.18           C  
ATOM    143  C   PRO A  37       8.421  -1.349  -6.542  1.00  9.85           C  
ATOM    144  O   PRO A  37       8.679  -1.270  -5.342  1.00  8.51           O  
ATOM    145  N   PRO A  38       7.641  -2.308  -6.942  1.00  8.71           N  
ATOM    146  CA  PRO A  38       6.865  -3.100  -6.032  1.00  9.08           C  
ATOM    147  C   PRO A  38       7.528  -3.963  -5.014  1.00  9.28           C  
ATOM    148  O   PRO A  38       6.901  -4.262  -3.999  1.00  6.50           O  
ATOM    149  N   ASP A  39       8.725  -4.479  -5.347  1.00 11.20           N  
ATOM    150  CA  ASP A  39       9.374  -5.345  -4.413  1.00 14.96           C  
ATOM    151  C   ASP A  39      10.393  -4.612  -3.610  1.00 13.99           C  
ATOM    152  O   ASP A  39      11.169  -5.285  -2.934  1.00 13.75           O  
ATOM    153  N   GLN A  40      10.515  -3.273  -3.651  1.00 11.60           N  
ATOM    154  CA  GLN A  40      11.087  -2.482  -2.606  1.00 10.76           C  
ATOM    155  C   GLN A  40      10.130  -2.267  -1.485  1.00  8.01           C  
ATOM    156  O   GLN A  40      10.529  -2.095  -0.334  1.00  8.96           O  
ATOM    157  N   GLN A  41       8.813  -2.347  -1.745  1.00  6.52           N  
ATOM    158  CA  GLN A  41       7.787  -2.081  -0.786  1.00  3.87           C  
ATOM    159  C   GLN A  41       7.329  -3.117   0.182  1.00  4.79           C  
ATOM    160  O   GLN A  41       7.289  -4.273  -0.237  1.00  6.34           O  
ATOM    161  N   ARG A  42       6.958  -2.790   1.433  1.00  5.73           N  
ATOM    162  CA  ARG A  42       6.546  -3.774   2.385  1.00  6.97           C  
ATOM    163  C   ARG A  42       5.344  -3.172   3.027  1.00  7.15           C  
ATOM    164  O   ARG A  42       5.449  -2.200   3.773  1.00  7.33           O  
ATOM    165  N   LEU A  43       4.172  -3.774   2.754  1.00  4.65           N  
ATOM    166  CA  LEU A  43       2.981  -3.172   3.268  1.00  3.51           C  
ATOM    167  C   LEU A  43       2.464  -3.764   4.534  1.00  5.56           C  
ATOM    168  O   LEU A  43       2.161  -4.954   4.594  1.00  4.19           O  
ATOM    169  N   ILE A  44       2.356  -2.964   5.610  1.00  4.58           N  
ATOM    170  CA  ILE A  44       1.817  -3.290   6.893  1.00  5.55           C  
ATOM    171  C   ILE A  44       0.420  -2.782   7.001  1.00  5.46           C  
ATOM    172  O   ILE A  44      -0.033  -1.717   6.584  1.00  6.04           O  
ATOM    173  N   PHE A  45      -0.495  -3.634   7.498  1.00  6.75           N  
ATOM    174  CA  PHE A  45      -1.715  -3.166   8.079  1.00  4.70           C  
ATOM    175  C   PHE A  45      -1.770  -3.772   9.440  1.00  6.34           C  
ATOM    176  O   PHE A  45      -1.885  -4.986   9.598  1.00  5.45           O  
ATOM    177  N   ALA A  46      -1.707  -2.889  10.452  1.00  6.53           N  
ATOM    178  CA  ALA A  46      -1.546  -3.065  11.862  1.00  7.15           C  
ATOM    179  C   ALA A  46      -0.196  -3.634  12.133  1.00  9.00           C  
ATOM    180  O   ALA A  46       0.702  -2.846  12.427  1.00 11.15           O  
ATOM    181  N   GLY A  47      -0.045  -4.968  12.058  1.00  9.35           N  
ATOM    182  CA  GLY A  47       1.163  -5.730  12.126  1.00 11.68           C  
ATOM    183  C   GLY A  47       1.194  -6.833  11.124  1.00 11.14           C  
ATOM    184  O   GLY A  47       2.012  -7.734  11.303  1.00 13.93           O  
ATOM    185  N   LYS A  48       0.247  -6.967  10.179  1.00 10.47           N  
ATOM    186  CA  LYS A  48       0.220  -8.038   9.231  1.00  8.82           C  
ATOM    187  C   LYS A  48       0.805  -7.550   7.950  1.00  7.68           C  
ATOM    188  O   LYS A  48       0.712  -6.390   7.552  1.00  6.47           O  
ATOM    189  N   GLN A  49       1.639  -8.399   7.323  1.00  8.89           N  
ATOM    190  CA  GLN A  49       2.259  -8.021   6.091  1.00  7.18           C  
ATOM    191  C   GLN A  49       1.437  -8.589   4.986  1.00  8.23           C  
ATOM    192  O   GLN A  49       1.016  -9.745   5.012  1.00  9.70           O  
ATOM    193  N   LEU A  50       1.091  -7.668   4.069  1.00  6.51           N  
ATOM    194  CA  LEU A  50       0.050  -7.956   3.133  1.00  7.41           C  
ATOM    195  C   LEU A  50       0.677  -8.720   2.017  1.00  8.27           C  
ATOM    196  O   LEU A  50       1.822  -8.486   1.633  1.00  8.34           O  
ATOM    197  N   GLU A  51      -0.114  -9.574   1.344  1.00  9.43           N  
ATOM    198  CA  GLU A  51       0.180 -10.405   0.218  1.00 11.90           C  
ATOM    199  C   GLU A  51      -0.232  -9.909  -1.125  1.00 11.49           C  
ATOM    200  O   GLU A  51      -1.338  -9.387  -1.253  1.00  9.88           O  
ATOM    201  N   ASP A  52       0.613 -10.143  -2.145  1.00 12.71           N  
ATOM    202  CA  ASP A  52       0.409  -9.557  -3.434  1.00 16.56           C  
ATOM    203  C   ASP A  52      -0.816  -9.837  -4.234  1.00 15.83           C  
ATOM    204  O   ASP A  52      -1.368  -8.926  -4.848  1.00 17.21           O  
ATOM    205  N   GLY A  53      -1.253 -11.107  -4.307  1.00 15.00           N  
ATOM    206  CA  GLY A  53      -2.373 -11.555  -5.074  1.00 11.77           C  
ATOM    207  C   GLY A  53      -3.541 -11.794  -4.180  1.00 11.10           C  
ATOM    208  O   GLY A  53      -4.397 -12.632  -4.459  1.00 11.25           O  
ATOM    209  N   ARG A  54      -3.669 -10.955  -3.136  1.00  8.53           N  
ATOM    210  CA  ARG A  54      -4.927 -10.830  -2.468  1.00  9.05           C  
ATOM    211  C   ARG A  54      -5.496  -9.455  -2.558  1.00  8.96           C  
ATOM    212  O   ARG A  54      -4.790  -8.505  -2.892  1.00 11.60           O  
ATOM    213  N   THR A  55      -6.816  -9.248  -2.406  1.00  9.05           N  
ATOM    214  CA  THR A  55      -7.405  -7.978  -2.697  1.00  9.03           C  
ATOM    215  C   THR A  55      -7.689  -7.163  -1.483  1.00  8.15           C  
ATOM    216  O   THR A  55      -7.732  -7.578  -0.326  1.00  5.91           O  
ATOM    217  N   LEU A  56      -7.951  -5.852  -1.630  1.00  6.91           N  
ATOM    218  CA  LEU A  56      -8.300  -5.014  -0.525  1.00  8.29           C  
ATOM    219  C   LEU A  56      -9.481  -5.458   0.268  1.00  8.05           C  
ATOM    220  O   LEU A  56      -9.560  -5.290   1.484  1.00 10.17           O  
ATOM    221  N   SER A  57     -10.542  -5.917  -0.419  1.00  8.92           N  
ATOM    222  CA  SER A  57     -11.814  -6.377   0.043  1.00  9.00           C  
ATOM    223  C   SER A  57     -11.768  -7.603   0.889  1.00  9.44           C  
ATOM    224  O   SER A  57     -12.497  -7.799   1.860  1.00 10.91           O  
ATOM    225  N   ASP A  58     -10.813  -8.509   0.613  1.00  9.11           N  
ATOM    226  CA  ASP A  58     -10.540  -9.753   1.263  1.00  7.91           C  
ATOM    227  C   ASP A  58     -10.032  -9.445   2.629  1.00  9.12           C  
ATOM    228  O   ASP A  58     -10.495 -10.060   3.588  1.00  8.61           O  
ATOM    229  N   TYR A  59      -9.037  -8.563   2.833  1.00  7.97           N  
ATOM    230  CA  TYR A  59      -8.561  -8.262   4.147  1.00  8.45           C  
ATOM    231  C   TYR A  59      -9.460  -7.351   4.911  1.00 10.98           C  
ATOM    232  O   TYR A  59      -9.156  -7.157   6.087  1.00 12.95           O  
ATOM    233  N   ASN A  60     -10.575  -6.870   4.331  1.00 12.38           N  
ATOM    234  CA  ASN A  60     -11.490  -5.859   4.762  1.00 13.94           C  
ATOM    235  C   ASN A  60     -10.756  -4.596   5.058  1.00 14.16           C  
ATOM    236  O   ASN A  60     -10.683  -4.136   6.197  1.00 14.26           O  
ATOM    237  N   ILE A  61     -10.237  -3.995   3.973  1.00 11.08           N  
ATOM    238  CA  ILE A  61      -9.678  -2.682   3.890  1.00 11.78           C  
ATOM    239  C   ILE A  61     -10.618  -1.825   3.114  1.00 13.74           C  
ATOM    240  O   ILE A  61     -10.768  -1.991   1.905  1.00 14.60           O  
ATOM    241  N   GLN A  62     -11.368  -0.991   3.856  1.00 13.97           N  
ATOM    242  CA  GLN A  62     -12.277  -0.054   3.270  1.00 15.52           C  
ATOM    243  C   GLN A  62     -11.677   1.281   2.991  1.00 13.94           C  
ATOM    244  O   GLN A  62     -10.457   1.416   3.058  1.00 12.15           O  
ATOM    245  N   LYS A  63     -12.397   2.329   2.551  1.00 11.73           N  
ATOM    246  CA  LYS A  63     -11.775   3.600   2.345  1.00 11.97           C  
ATOM    247  C   LYS A  63     -11.130   4.194   3.550  1.00 10.41           C  
ATOM    248  O   LYS A  63     -11.325   3.822   4.706  1.00  9.59           O  
ATOM    249  N   GLU A  64     -10.138   5.057   3.267  1.00 10.04           N  
ATOM    250  CA  GLU A  64      -9.393   5.973   4.075  1.00 10.94           C  
ATOM    251  C   GLU A  64      -8.553   5.300   5.105  1.00  9.74           C  
ATOM    252  O   GLU A  64      -8.282   5.826   6.183  1.00  9.42           O  
ATOM    253  N   SER A  65      -8.180   4.038   4.824  1.00  6.85           N  
ATOM    254  CA  SER A  65      -7.468   3.188   5.727  1.00  6.90           C  
ATOM    255  C   SER A  65      -6.012   3.494   5.660  1.00  4.72           C  
ATOM    256  O   SER A  65      -5.461   3.737   4.587  1.00  3.91           O  
ATOM    257  N   THR A  66      -5.384   3.678   6.835  1.00  4.48           N  
ATOM    258  CA  THR A  66      -3.982   3.955   6.895  1.00  3.80           C  
ATOM    259  C   THR A  66      -3.249   2.661   6.817  1.00  4.60           C  
ATOM    260  O   THR A  66      -3.226   1.922   7.800  1.00  5.33           O  
ATOM    261  N   LEU A  67      -2.517   2.467   5.705  1.00  4.17           N  
ATOM    262  CA  LEU A  67      -1.641   1.363   5.463  1.00  3.85           C  
ATOM    263  C   LEU A  67      -0.263   1.883   5.688  1.00  3.80           C  
ATOM    264  O   LEU A  67      -0.009   3.054   5.412  1.00  5.54           O  
ATOM    265  N   HIS A  68       0.703   1.062   6.139  1.00  2.94           N  
ATOM    266  CA  HIS A  68       2.012   1.552   6.437  1.00  4.17           C  
ATOM    267  C   HIS A  68       3.035   0.990   5.511  1.00  5.32           C  
ATOM    268  O   HIS A  68       3.182  -0.231   5.461  1.00  7.70           O  
ATOM    269  N   LEU A  69       3.699   1.836   4.704  1.00  5.29           N  
ATOM    270  CA  LEU A  69       4.825   1.524   3.879  1.00  3.97           C  
ATOM    271  C   LEU A  69       6.096   1.607   4.652  1.00  5.07           C  
ATOM    272  O   LEU A  69       6.470   2.564   5.329  1.00  4.34           O  
ATOM    273  N   VAL A  70       6.821   0.477   4.573  1.00  4.29           N  
ATOM    274  CA  VAL A  70       8.172   0.214   4.961  1.00  6.26           C  
ATOM    275  C   VAL A  70       9.012  -0.198   3.801  1.00  9.22           C  
ATOM    276  O   VAL A  70       8.675  -1.121   3.061  1.00  9.36           O  
TER
ENDMDL
MODEL      11
ATOM      1  N   GLN A   2      -9.915   6.766  -0.484  1.00  9.27           N  
ATOM      2  CA  GLN A   2      -8.520   7.008  -0.289  1.00  9.07           C  
ATOM      3  C   GLN A   2      -7.920   6.272   0.860  1.00  8.72           C  
ATOM      4  O   GLN A   2      -8.521   6.103   1.920  1.00  8.22           O  
ATOM      5  N   ILE A   3      -6.703   5.727   0.687  1.00  5.87           N  
ATOM      6  CA  ILE A   3      -5.949   5.090   1.722  1.00  5.07           C  
ATOM      7  C   ILE A   3      -4.690   5.842   1.983  1.00  4.01           C  
ATOM      8  O   ILE A   3      -3.969   6.287   1.091  1.00  4.61           O  
ATOM      9  N   PHE A   4      -4.324   5.948   3.273  1.00  4.55           N  
ATOM     10  CA  PHE A   4      -3.124   6.647   3.615  1.00  4.68           C  
ATOM     11  C   PHE A   4      -2.004   5.697   3.867  1.00  5.30           C  
ATOM     12  O   PHE A   4      -2.027   4.848   4.756  1.00  5.58           O  
ATOM     13  N   VAL A   5      -0.994   5.804   2.985  1.00  4.44           N  
ATOM     14  CA  VAL A   5       0.155   4.964   3.115  1.00  3.87           C  
ATOM     15  C   VAL A   5       1.236   5.760   3.763  1.00  4.93           C  
ATOM     16  O   VAL A   5       1.733   6.637   3.058  1.00  6.84           O  
ATOM     17  N   LYS A   6       1.556   5.486   5.040  1.00  6.04           N  
ATOM     18  CA  LYS A   6       2.534   6.236   5.766  1.00  6.12           C  
ATOM     19  C   LYS A   6       3.888   5.634   5.613  1.00  6.57           C  
ATOM     20  O   LYS A   6       4.017   4.450   5.920  1.00  5.76           O  
ATOM     21  N   THR A   7       4.925   6.357   5.154  1.00  7.41           N  
ATOM     22  CA  THR A   7       6.269   5.872   5.081  1.00  7.48           C  
ATOM     23  C   THR A   7       6.862   5.836   6.447  1.00  8.75           C  
ATOM     24  O   THR A   7       6.408   6.503   7.376  1.00  8.58           O  
ATOM     25  N   LEU A   8       7.984   5.106   6.584  1.00  9.84           N  
ATOM     26  CA  LEU A   8       8.685   4.986   7.825  1.00 14.15           C  
ATOM     27  C   LEU A   8       9.407   6.217   8.252  1.00 17.37           C  
ATOM     28  O   LEU A   8       9.605   6.446   9.444  1.00 17.01           O  
ATOM     29  N   THR A   9       9.737   7.115   7.307  1.00 18.33           N  
ATOM     30  CA  THR A   9      10.318   8.411   7.472  1.00 19.24           C  
ATOM     31  C   THR A   9       9.332   9.377   8.033  1.00 19.48           C  
ATOM     32  O   THR A   9       9.423   9.619   9.236  1.00 23.14           O  
ATOM     33  N   GLY A  10       8.392   9.939   7.252  1.00 19.43           N  
ATOM     34  CA  GLY A  10       7.247  10.741   7.555  1.00 18.74           C  
ATOM     35  C   GLY A  10       6.545  11.302   6.367  1.00 17.62           C  
ATOM     36  O   GLY A  10       6.276  12.501   6.318  1.00 19.74           O  
ATOM     37  N   LYS A  11       6.354  10.473   5.325  1.00 13.56           N  
ATOM     38  CA  LYS A  11       5.645  10.951   4.178  1.00 11.91           C  
ATOM     39  C   LYS A  11       4.442  10.073   4.140  1.00 10.18           C  
ATOM     40  O   LYS A  11       4.431   8.899   4.506  1.00  9.10           O  
ATOM     41  N   THR A  12       3.302  10.668   3.743  1.00  9.63           N  
ATOM     42  CA  THR A  12       2.056   9.975   3.639  1.00  9.85           C  
ATOM     43  C   THR A  12       1.594  10.154   2.234  1.00 11.66           C  
ATOM     44  O   THR A  12       1.326  11.246   1.737  1.00 12.33           O  
ATOM     45  N   ILE A  13       1.507   9.049   1.471  1.00 10.42           N  
ATOM     46  CA  ILE A  13       1.006   9.037   0.132  1.00 11.84           C  
ATOM     47  C   ILE A  13      -0.423   8.614   0.142  1.00 10.55           C  
ATOM     48  O   ILE A  13      -0.866   7.822   0.973  1.00 11.92           O  
ATOM     49  N   THR A  14      -1.243   9.388  -0.591  1.00  9.39           N  
ATOM     50  CA  THR A  14      -2.665   9.243  -0.598  1.00  9.63           C  
ATOM     51  C   THR A  14      -2.991   8.518  -1.858  1.00 11.20           C  
ATOM     52  O   THR A  14      -2.930   9.132  -2.923  1.00 11.63           O  
ATOM     53  N   LEU A  15      -3.251   7.199  -1.864  1.00  8.29           N  
ATOM     54  CA  LEU A  15      -3.574   6.418  -3.018  1.00  9.03           C  
ATOM     55  C   LEU A  15      -5.061   6.331  -2.993  1.00  8.59           C  
ATOM     56  O   LEU A  15      -5.755   6.117  -2.001  1.00  7.79           O  
ATOM     57  N   GLU A  16      -5.689   6.498  -4.171  1.00 11.04           N  
ATOM     58  CA  GLU A  16      -7.061   6.238  -4.480  1.00 11.50           C  
ATOM     59  C   GLU A  16      -7.287   4.816  -4.865  1.00 10.13           C  
ATOM     60  O   GLU A  16      -6.787   4.401  -5.909  1.00  9.83           O  
ATOM     61  N   VAL A  17      -8.115   4.071  -4.110  1.00  8.99           N  
ATOM     62  CA  VAL A  17      -8.271   2.654  -4.224  1.00  8.85           C  
ATOM     63  C   VAL A  17      -9.748   2.464  -4.281  1.00  8.04           C  
ATOM     64  O   VAL A  17     -10.531   3.322  -3.878  1.00  8.99           O  
ATOM     65  N   GLU A  18     -10.128   1.298  -4.835  1.00  7.29           N  
ATOM     66  CA  GLU A  18     -11.376   0.616  -4.687  1.00  7.08           C  
ATOM     67  C   GLU A  18     -11.388  -0.395  -3.593  1.00  6.45           C  
ATOM     68  O   GLU A  18     -10.314  -0.978  -3.453  1.00  5.28           O  
ATOM     69  N   PRO A  19     -12.426  -0.684  -2.866  1.00  7.24           N  
ATOM     70  CA  PRO A  19     -12.341  -1.575  -1.746  1.00  7.07           C  
ATOM     71  C   PRO A  19     -12.153  -3.005  -2.120  1.00  6.65           C  
ATOM     72  O   PRO A  19     -11.804  -3.784  -1.234  1.00  6.37           O  
ATOM     73  N   SER A  20     -12.250  -3.312  -3.426  1.00  6.80           N  
ATOM     74  CA  SER A  20     -12.028  -4.517  -4.163  1.00  6.28           C  
ATOM     75  C   SER A  20     -10.634  -4.660  -4.669  1.00  8.45           C  
ATOM     76  O   SER A  20     -10.245  -5.693  -5.213  1.00  7.26           O  
ATOM     77  N   ASP A  21      -9.766  -3.640  -4.546  1.00  7.50           N  
ATOM     78  CA  ASP A  21      -8.382  -3.682  -4.905  1.00  7.70           C  
ATOM     79  C   ASP A  21      -7.541  -4.554  -4.038  1.00  7.08           C  
ATOM     80  O   ASP A  21      -7.965  -4.865  -2.926  1.00  8.11           O  
ATOM     81  N   THR A  22      -6.435  -5.075  -4.599  1.00  5.37           N  
ATOM     82  CA  THR A  22      -5.608  -6.026  -3.925  1.00  6.01           C  
ATOM     83  C   THR A  22      -4.356  -5.337  -3.504  1.00  8.01           C  
ATOM     84  O   THR A  22      -4.034  -4.237  -3.951  1.00  8.11           O  
ATOM     85  N   ILE A  23      -3.611  -5.949  -2.566  1.00  8.32           N  
ATOM     86  CA  ILE A  23      -2.399  -5.372  -2.073  1.00  9.92           C  
ATOM     87  C   ILE A  23      -1.367  -5.310  -3.146  1.00 10.01           C  
ATOM     88  O   ILE A  23      -0.575  -4.371  -3.212  1.00  8.71           O  
ATOM     89  N   GLU A  24      -1.355  -6.203  -4.151  1.00  9.54           N  
ATOM     90  CA  GLU A  24      -0.760  -6.016  -5.438  1.00 11.81           C  
ATOM     91  C   GLU A  24      -0.948  -4.742  -6.187  1.00 11.14           C  
ATOM     92  O   GLU A  24      -0.088  -4.153  -6.839  1.00 10.62           O  
ATOM     93  N   ASN A  25      -2.177  -4.196  -6.163  1.00  9.43           N  
ATOM     94  CA  ASN A  25      -2.522  -2.989  -6.848  1.00 10.96           C  
ATOM     95  C   ASN A  25      -2.111  -1.755  -6.121  1.00  9.68           C  
ATOM     96  O   ASN A  25      -1.796  -0.759  -6.771  1.00  9.33           O  
ATOM     97  N   VAL A  26      -2.062  -1.840  -4.779  1.00  6.52           N  
ATOM     98  CA  VAL A  26      -1.740  -0.783  -3.871  1.00  5.53           C  
ATOM     99  C   VAL A  26      -0.298  -0.493  -4.109  1.00  4.42           C  
ATOM    100  O   VAL A  26       0.083   0.676  -4.110  1.00  3.40           O  
ATOM    101  N   LYS A  27       0.539  -1.520  -4.343  1.00  2.64           N  
ATOM    102  CA  LYS A  27       1.935  -1.423  -4.635  1.00  4.14           C  
ATOM    103  C   LYS A  27       2.223  -0.869  -5.988  1.00  5.58           C  
ATOM    104  O   LYS A  27       3.128  -0.040  -6.063  1.00  4.11           O  
ATOM    105  N   ALA A  28       1.482  -1.282  -7.031  1.00  6.61           N  
ATOM    106  CA  ALA A  28       1.471  -0.719  -8.346  1.00  7.74           C  
ATOM    107  C   ALA A  28       1.349   0.766  -8.311  1.00  9.17           C  
ATOM    108  O   ALA A  28       1.982   1.533  -9.034  1.00 11.45           O  
ATOM    109  N   LYS A  29       0.458   1.301  -7.457  1.00  8.96           N  
ATOM    110  CA  LYS A  29       0.105   2.684  -7.375  1.00  7.90           C  
ATOM    111  C   LYS A  29       1.184   3.419  -6.658  1.00  6.92           C  
ATOM    112  O   LYS A  29       1.393   4.612  -6.871  1.00  6.87           O  
ATOM    113  N   ILE A  30       1.913   2.830  -5.693  1.00  4.57           N  
ATOM    114  CA  ILE A  30       3.054   3.513  -5.168  1.00  5.58           C  
ATOM    115  C   ILE A  30       4.223   3.624  -6.085  1.00  7.26           C  
ATOM    116  O   ILE A  30       4.863   4.671  -6.178  1.00  9.46           O  
ATOM    117  N   GLN A  31       4.539   2.554  -6.836  1.00  7.06           N  
ATOM    118  CA  GLN A  31       5.473   2.349  -7.899  1.00  8.67           C  
ATOM    119  C   GLN A  31       5.300   3.417  -8.924  1.00 10.90           C  
ATOM    120  O   GLN A  31       6.282   3.976  -9.410  1.00  9.63           O  
ATOM    121  N   ASP A  32       4.033   3.654  -9.307  1.00 10.93           N  
ATOM    122  CA  ASP A  32       3.633   4.746 -10.140  1.00 14.01           C  
ATOM    123  C   ASP A  32       3.943   6.085  -9.564  1.00 14.04           C  
ATOM    124  O   ASP A  32       4.633   6.924 -10.142  1.00 13.39           O  
ATOM    125  N   LYS A  33       3.460   6.403  -8.350  1.00 14.22           N  
ATOM    126  CA  LYS A  33       3.693   7.700  -7.794  1.00 14.00           C  
ATOM    127  C   LYS A  33       5.038   8.063  -7.266  1.00 12.37           C  
ATOM    128  O   LYS A  33       5.459   9.202  -7.462  1.00 12.17           O  
ATOM    129  N   GLU A  34       5.794   7.171  -6.601  1.00 10.11           N  
ATOM    130  CA  GLU A  34       7.070   7.432  -6.011  1.00 10.07           C  
ATOM    131  C   GLU A  34       8.217   6.815  -6.736  1.00  9.32           C  
ATOM    132  O   GLU A  34       9.278   7.434  -6.799  1.00 11.61           O  
ATOM    133  N   GLY A  35       8.117   5.575  -7.246  1.00  7.22           N  
ATOM    134  CA  GLY A  35       9.247   4.857  -7.749  1.00  6.29           C  
ATOM    135  C   GLY A  35       9.907   4.013  -6.714  1.00  6.93           C  
ATOM    136  O   GLY A  35      11.130   3.983  -6.591  1.00  7.41           O  
ATOM    137  N   ILE A  36       9.092   3.295  -5.921  1.00  5.86           N  
ATOM    138  CA  ILE A  36       9.619   2.381  -4.955  1.00  6.07           C  
ATOM    139  C   ILE A  36       9.188   1.085  -5.551  1.00  6.36           C  
ATOM    140  O   ILE A  36       7.992   0.883  -5.758  1.00  6.18           O  
ATOM    141  N   PRO A  37      10.009   0.106  -5.791  1.00  8.65           N  
ATOM    142  CA  PRO A  37       9.693  -1.124  -6.457  1.00  9.18           C  
ATOM    143  C   PRO A  37       8.767  -2.036  -5.728  1.00  9.85           C  
ATOM    144  O   PRO A  37       8.768  -2.013  -4.498  1.00  8.51           O  
ATOM    145  N   PRO A  38       7.973  -2.917  -6.261  1.00  8.71           N  
ATOM    146  CA  PRO A  38       7.048  -3.569  -5.380  1.00  9.08           C  
ATOM    147  C   PRO A  38       7.679  -4.648  -4.568  1.00  9.28           C  
ATOM    148  O   PRO A  38       7.088  -4.924  -3.526  1.00  6.50           O  
ATOM    149  N   ASP A  39       8.852  -5.211  -4.911  1.00 11.20           N  
ATOM    150  CA  ASP A  39       9.630  -6.013  -4.019  1.00 14.96           C  
ATOM    151  C   ASP A  39      10.256  -5.288  -2.878  1.00 13.99           C  
ATOM    152  O   ASP A  39      10.764  -6.011  -2.021  1.00 13.75           O  
ATOM    153  N   GLN A  40      10.295  -3.945  -2.825  1.00 11.60           N  
ATOM    154  CA  GLN A  40      10.936  -3.249  -1.752  1.00 10.76           C  
ATOM    155  C   GLN A  40       9.980  -2.814  -0.694  1.00  8.01           C  
ATOM    156  O   GLN A  40      10.472  -2.461   0.376  1.00  8.96           O  
ATOM    157  N   GLN A  41       8.681  -2.811  -1.044  1.00  6.52           N  
ATOM    158  CA  GLN A  41       7.543  -2.392  -0.286  1.00  3.87           C  
ATOM    159  C   GLN A  41       6.948  -3.534   0.464  1.00  4.79           C  
ATOM    160  O   GLN A  41       6.459  -4.545  -0.038  1.00  6.34           O  
ATOM    161  N   ARG A  42       6.968  -3.383   1.800  1.00  5.73           N  
ATOM    162  CA  ARG A  42       6.293  -4.238   2.727  1.00  6.97           C  
ATOM    163  C   ARG A  42       5.278  -3.384   3.407  1.00  7.15           C  
ATOM    164  O   ARG A  42       5.665  -2.425   4.072  1.00  7.33           O  
ATOM    165  N   LEU A  43       3.995  -3.659   3.111  1.00  4.65           N  
ATOM    166  CA  LEU A  43       2.859  -3.025   3.704  1.00  3.51           C  
ATOM    167  C   LEU A  43       2.468  -3.719   4.963  1.00  5.56           C  
ATOM    168  O   LEU A  43       2.101  -4.889   5.057  1.00  4.19           O  
ATOM    169  N   ILE A  44       2.618  -3.006   6.094  1.00  4.58           N  
ATOM    170  CA  ILE A  44       2.073  -3.500   7.320  1.00  5.55           C  
ATOM    171  C   ILE A  44       0.786  -2.774   7.516  1.00  5.46           C  
ATOM    172  O   ILE A  44       0.726  -1.574   7.253  1.00  6.04           O  
ATOM    173  N   PHE A  45      -0.289  -3.398   8.028  1.00  6.75           N  
ATOM    174  CA  PHE A  45      -1.493  -2.729   8.414  1.00  4.70           C  
ATOM    175  C   PHE A  45      -1.829  -3.147   9.805  1.00  6.34           C  
ATOM    176  O   PHE A  45      -2.037  -4.319  10.112  1.00  5.45           O  
ATOM    177  N   ALA A  46      -1.762  -2.267  10.820  1.00  6.53           N  
ATOM    178  CA  ALA A  46      -1.701  -2.511  12.227  1.00  7.15           C  
ATOM    179  C   ALA A  46      -0.453  -3.125  12.762  1.00  9.00           C  
ATOM    180  O   ALA A  46       0.530  -2.450  13.067  1.00 11.15           O  
ATOM    181  N   GLY A  47      -0.419  -4.467  12.844  1.00  9.35           N  
ATOM    182  CA  GLY A  47       0.785  -5.101  13.284  1.00 11.68           C  
ATOM    183  C   GLY A  47       0.943  -6.459  12.693  1.00 11.14           C  
ATOM    184  O   GLY A  47       1.448  -7.334  13.394  1.00 13.93           O  
ATOM    185  N   LYS A  48       0.463  -6.538  11.439  1.00 10.47           N  
ATOM    186  CA  LYS A  48       0.620  -7.699  10.620  1.00  8.82           C  
ATOM    187  C   LYS A  48       0.688  -7.399   9.162  1.00  7.68           C  
ATOM    188  O   LYS A  48       0.056  -6.459   8.682  1.00  6.47           O  
ATOM    189  N   GLN A  49       1.500  -8.171   8.419  1.00  8.89           N  
ATOM    190  CA  GLN A  49       1.745  -7.968   7.024  1.00  7.18           C  
ATOM    191  C   GLN A  49       0.621  -8.346   6.123  1.00  8.23           C  
ATOM    192  O   GLN A  49      -0.092  -9.341   6.240  1.00  9.70           O  
ATOM    193  N   LEU A  50       0.409  -7.391   5.200  1.00  6.51           N  
ATOM    194  CA  LEU A  50      -0.621  -7.537   4.218  1.00  7.41           C  
ATOM    195  C   LEU A  50      -0.100  -8.293   3.044  1.00  8.27           C  
ATOM    196  O   LEU A  50       1.044  -8.207   2.601  1.00  8.34           O  
ATOM    197  N   GLU A  51      -0.980  -9.024   2.337  1.00  9.43           N  
ATOM    198  CA  GLU A  51      -0.543 -10.103   1.507  1.00 11.90           C  
ATOM    199  C   GLU A  51      -1.202  -9.875   0.190  1.00 11.49           C  
ATOM    200  O   GLU A  51      -2.393  -9.619   0.025  1.00  9.88           O  
ATOM    201  N   ASP A  52      -0.417  -9.986  -0.897  1.00 12.71           N  
ATOM    202  CA  ASP A  52      -0.670  -9.647  -2.263  1.00 16.56           C  
ATOM    203  C   ASP A  52      -2.018  -9.958  -2.818  1.00 15.83           C  
ATOM    204  O   ASP A  52      -2.642  -9.019  -3.308  1.00 17.21           O  
ATOM    205  N   GLY A  53      -2.490 -11.217  -2.829  1.00 15.00           N  
ATOM    206  CA  GLY A  53      -3.671 -11.586  -3.545  1.00 11.77           C  
ATOM    207  C   GLY A  53      -4.940 -11.333  -2.806  1.00 11.10           C  
ATOM    208  O   GLY A  53      -6.036 -11.662  -3.255  1.00 11.25           O  
ATOM    209  N   ARG A  54      -4.899 -10.546  -1.716  1.00  8.53           N  
ATOM    210  CA  ARG A  54      -5.991 -10.332  -0.817  1.00  9.05           C  
ATOM    211  C   ARG A  54      -6.423  -8.910  -0.923  1.00  8.96           C  
ATOM    212  O   ARG A  54      -5.674  -8.061  -1.404  1.00 11.60           O  
ATOM    213  N   THR A  55      -7.643  -8.507  -0.524  1.00  9.05           N  
ATOM    214  CA  THR A  55      -8.170  -7.197  -0.747  1.00  9.03           C  
ATOM    215  C   THR A  55      -8.376  -6.440   0.520  1.00  8.15           C  
ATOM    216  O   THR A  55      -8.082  -6.864   1.636  1.00  5.91           O  
ATOM    217  N   LEU A  56      -8.910  -5.231   0.269  1.00  6.91           N  
ATOM    218  CA  LEU A  56      -9.167  -4.326   1.347  1.00  8.29           C  
ATOM    219  C   LEU A  56     -10.349  -4.684   2.180  1.00  8.05           C  
ATOM    220  O   LEU A  56     -10.424  -4.550   3.401  1.00 10.17           O  
ATOM    221  N   SER A  57     -11.315  -5.359   1.532  1.00  8.92           N  
ATOM    222  CA  SER A  57     -12.413  -5.933   2.245  1.00  9.00           C  
ATOM    223  C   SER A  57     -12.155  -7.043   3.204  1.00  9.44           C  
ATOM    224  O   SER A  57     -12.937  -7.110   4.151  1.00 10.91           O  
ATOM    225  N   ASP A  58     -11.128  -7.867   2.927  1.00  9.11           N  
ATOM    226  CA  ASP A  58     -10.721  -8.988   3.716  1.00  7.91           C  
ATOM    227  C   ASP A  58     -10.209  -8.533   5.039  1.00  9.12           C  
ATOM    228  O   ASP A  58     -10.509  -9.082   6.098  1.00  8.61           O  
ATOM    229  N   TYR A  59      -9.360  -7.491   4.989  1.00  7.97           N  
ATOM    230  CA  TYR A  59      -8.668  -6.971   6.127  1.00  8.45           C  
ATOM    231  C   TYR A  59      -9.467  -5.870   6.735  1.00 10.98           C  
ATOM    232  O   TYR A  59      -9.074  -5.467   7.829  1.00 12.95           O  
ATOM    233  N   ASN A  60     -10.565  -5.371   6.141  1.00 12.38           N  
ATOM    234  CA  ASN A  60     -11.403  -4.314   6.616  1.00 13.94           C  
ATOM    235  C   ASN A  60     -10.705  -3.009   6.790  1.00 14.16           C  
ATOM    236  O   ASN A  60     -10.594  -2.372   7.837  1.00 14.26           O  
ATOM    237  N   ILE A  61     -10.092  -2.669   5.643  1.00 11.08           N  
ATOM    238  CA  ILE A  61      -9.395  -1.442   5.412  1.00 11.78           C  
ATOM    239  C   ILE A  61     -10.391  -0.521   4.797  1.00 13.74           C  
ATOM    240  O   ILE A  61     -10.815  -0.617   3.646  1.00 14.60           O  
ATOM    241  N   GLN A  62     -10.822   0.485   5.579  1.00 13.97           N  
ATOM    242  CA  GLN A  62     -11.757   1.487   5.171  1.00 15.52           C  
ATOM    243  C   GLN A  62     -11.070   2.644   4.531  1.00 13.94           C  
ATOM    244  O   GLN A  62      -9.850   2.770   4.435  1.00 12.15           O  
ATOM    245  N   LYS A  63     -11.839   3.667   4.118  1.00 11.73           N  
ATOM    246  CA  LYS A  63     -11.366   4.994   3.876  1.00 11.97           C  
ATOM    247  C   LYS A  63     -10.615   5.637   4.991  1.00 10.41           C  
ATOM    248  O   LYS A  63     -10.893   5.497   6.181  1.00  9.59           O  
ATOM    249  N   GLU A  64      -9.554   6.403   4.681  1.00 10.04           N  
ATOM    250  CA  GLU A  64      -8.882   7.274   5.594  1.00 10.94           C  
ATOM    251  C   GLU A  64      -8.099   6.531   6.621  1.00  9.74           C  
ATOM    252  O   GLU A  64      -7.747   7.083   7.663  1.00  9.42           O  
ATOM    253  N   SER A  65      -7.748   5.259   6.359  1.00  6.85           N  
ATOM    254  CA  SER A  65      -7.019   4.308   7.139  1.00  6.90           C  
ATOM    255  C   SER A  65      -5.544   4.330   6.932  1.00  4.72           C  
ATOM    256  O   SER A  65      -5.097   4.325   5.786  1.00  3.91           O  
ATOM    257  N   THR A  66      -4.734   4.280   8.005  1.00  4.48           N  
ATOM    258  CA  THR A  66      -3.311   4.342   7.879  1.00  3.80           C  
ATOM    259  C   THR A  66      -2.537   3.070   7.832  1.00  4.60           C  
ATOM    260  O   THR A  66      -2.584   2.271   8.766  1.00  5.33           O  
ATOM    261  N   LEU A  67      -1.837   2.816   6.712  1.00  4.17           N  
ATOM    262  CA  LEU A  67      -1.070   1.633   6.473  1.00  3.85           C  
ATOM    263  C   LEU A  67       0.351   2.078   6.539  1.00  3.80           C  
ATOM    264  O   LEU A  67       0.651   3.261   6.384  1.00  5.54           O  
ATOM    265  N   HIS A  68       1.248   1.159   6.937  1.00  2.94           N  
ATOM    266  CA  HIS A  68       2.625   1.534   7.035  1.00  4.17           C  
ATOM    267  C   HIS A  68       3.317   0.880   5.890  1.00  5.32           C  
ATOM    268  O   HIS A  68       3.053  -0.282   5.583  1.00  7.70           O  
ATOM    269  N   LEU A  69       4.256   1.648   5.309  1.00  5.29           N  
ATOM    270  CA  LEU A  69       5.202   1.188   4.341  1.00  3.97           C  
ATOM    271  C   LEU A  69       6.571   1.065   4.915  1.00  5.07           C  
ATOM    272  O   LEU A  69       7.232   2.067   5.187  1.00  4.34           O  
ATOM    273  N   VAL A  70       6.929  -0.217   5.109  1.00  4.29           N  
ATOM    274  CA  VAL A  70       8.264  -0.514   5.528  1.00  6.26           C  
ATOM    275  C   VAL A  70       9.053  -0.804   4.298  1.00  9.22           C  
ATOM    276  O   VAL A  70       8.659  -1.637   3.483  1.00  9.36           O  
TER
ENDMDL
MODEL      12
ATOM      1  N   GLN A   2      -9.952   6.637   0.802  1.00  9.27           N  
ATOM      2  CA  GLN A   2      -8.571   6.971   0.964  1.00  9.07           C  
ATOM      3  C   GLN A   2      -7.879   6.111   1.965  1.00  8.72           C  
ATOM      4  O   GLN A   2      -8.346   5.646   3.003  1.00  8.22           O  
ATOM      5  N   ILE A   3      -6.577   5.856   1.743  1.00  5.87           N  
ATOM      6  CA  ILE A   3      -5.636   5.239   2.625  1.00  5.07           C  
ATOM      7  C   ILE A   3      -4.486   6.186   2.641  1.00  4.01           C  
ATOM      8  O   ILE A   3      -4.320   7.067   1.799  1.00  4.61           O  
ATOM      9  N   PHE A   4      -3.650   5.965   3.672  1.00  4.55           N  
ATOM     10  CA  PHE A   4      -2.486   6.745   3.959  1.00  4.68           C  
ATOM     11  C   PHE A   4      -1.357   5.772   3.954  1.00  5.30           C  
ATOM     12  O   PHE A   4      -1.087   5.103   4.951  1.00  5.58           O  
ATOM     13  N   VAL A   5      -0.591   5.751   2.850  1.00  4.44           N  
ATOM     14  CA  VAL A   5       0.613   4.983   2.776  1.00  3.87           C  
ATOM     15  C   VAL A   5       1.732   5.888   3.163  1.00  4.93           C  
ATOM     16  O   VAL A   5       1.816   6.979   2.601  1.00  6.84           O  
ATOM     17  N   LYS A   6       2.558   5.581   4.179  1.00  6.04           N  
ATOM     18  CA  LYS A   6       3.547   6.455   4.729  1.00  6.12           C  
ATOM     19  C   LYS A   6       4.896   5.822   4.698  1.00  6.57           C  
ATOM     20  O   LYS A   6       4.978   4.607   4.867  1.00  5.76           O  
ATOM     21  N   THR A   7       5.993   6.599   4.635  1.00  7.41           N  
ATOM     22  CA  THR A   7       7.316   6.062   4.708  1.00  7.48           C  
ATOM     23  C   THR A   7       7.879   5.921   6.080  1.00  8.75           C  
ATOM     24  O   THR A   7       7.306   6.350   7.080  1.00  8.58           O  
ATOM     25  N   LEU A   8       9.135   5.450   6.180  1.00  9.84           N  
ATOM     26  CA  LEU A   8       9.930   5.686   7.345  1.00 14.15           C  
ATOM     27  C   LEU A   8      10.377   7.077   7.637  1.00 17.37           C  
ATOM     28  O   LEU A   8      10.261   7.636   8.726  1.00 17.01           O  
ATOM     29  N   THR A   9      10.765   7.802   6.572  1.00 18.33           N  
ATOM     30  CA  THR A   9      11.413   9.065   6.745  1.00 19.24           C  
ATOM     31  C   THR A   9      10.480  10.095   7.284  1.00 19.48           C  
ATOM     32  O   THR A   9      10.662  10.684   8.349  1.00 23.14           O  
ATOM     33  N   GLY A  10       9.354  10.336   6.589  1.00 19.43           N  
ATOM     34  CA  GLY A  10       8.368  11.316   6.923  1.00 18.74           C  
ATOM     35  C   GLY A  10       7.540  11.797   5.782  1.00 17.62           C  
ATOM     36  O   GLY A  10       6.910  12.854   5.777  1.00 19.74           O  
ATOM     37  N   LYS A  11       7.409  10.981   4.721  1.00 13.56           N  
ATOM     38  CA  LYS A  11       6.425  11.189   3.704  1.00 11.91           C  
ATOM     39  C   LYS A  11       5.201  10.345   3.802  1.00 10.18           C  
ATOM     40  O   LYS A  11       5.255   9.237   4.334  1.00  9.10           O  
ATOM     41  N   THR A  12       4.037  10.858   3.364  1.00  9.63           N  
ATOM     42  CA  THR A  12       2.743  10.249   3.340  1.00  9.85           C  
ATOM     43  C   THR A  12       2.296  10.356   1.923  1.00 11.66           C  
ATOM     44  O   THR A  12       2.463  11.398   1.290  1.00 12.33           O  
ATOM     45  N   ILE A  13       1.720   9.310   1.306  1.00 10.42           N  
ATOM     46  CA  ILE A  13       1.154   9.337  -0.007  1.00 11.84           C  
ATOM     47  C   ILE A  13      -0.261   8.930   0.222  1.00 10.55           C  
ATOM     48  O   ILE A  13      -0.567   7.786   0.557  1.00 11.92           O  
ATOM     49  N   THR A  14      -1.217   9.860   0.049  1.00  9.39           N  
ATOM     50  CA  THR A  14      -2.616   9.570   0.098  1.00  9.63           C  
ATOM     51  C   THR A  14      -3.151   8.969  -1.156  1.00 11.20           C  
ATOM     52  O   THR A  14      -3.072   9.537  -2.244  1.00 11.63           O  
ATOM     53  N   LEU A  15      -3.697   7.740  -1.137  1.00  8.29           N  
ATOM     54  CA  LEU A  15      -4.121   7.054  -2.318  1.00  9.03           C  
ATOM     55  C   LEU A  15      -5.598   6.875  -2.392  1.00  8.59           C  
ATOM     56  O   LEU A  15      -6.201   6.631  -1.348  1.00  7.79           O  
ATOM     57  N   GLU A  16      -6.157   6.939  -3.614  1.00 11.04           N  
ATOM     58  CA  GLU A  16      -7.546   6.674  -3.826  1.00 11.50           C  
ATOM     59  C   GLU A  16      -7.636   5.282  -4.350  1.00 10.13           C  
ATOM     60  O   GLU A  16      -7.481   5.055  -5.549  1.00  9.83           O  
ATOM     61  N   VAL A  17      -7.937   4.354  -3.424  1.00  8.99           N  
ATOM     62  CA  VAL A  17      -8.177   2.974  -3.713  1.00  8.85           C  
ATOM     63  C   VAL A  17      -9.621   2.610  -3.660  1.00  8.04           C  
ATOM     64  O   VAL A  17     -10.431   3.376  -3.140  1.00  8.99           O  
ATOM     65  N   GLU A  18      -9.974   1.365  -4.026  1.00  7.29           N  
ATOM     66  CA  GLU A  18     -11.257   0.750  -3.885  1.00  7.08           C  
ATOM     67  C   GLU A  18     -11.047  -0.463  -3.044  1.00  6.45           C  
ATOM     68  O   GLU A  18      -9.986  -1.068  -3.183  1.00  5.28           O  
ATOM     69  N   PRO A  19     -11.976  -0.962  -2.284  1.00  7.24           N  
ATOM     70  CA  PRO A  19     -11.712  -2.032  -1.367  1.00  7.07           C  
ATOM     71  C   PRO A  19     -11.401  -3.346  -1.997  1.00  6.65           C  
ATOM     72  O   PRO A  19     -10.953  -4.293  -1.353  1.00  6.37           O  
ATOM     73  N   SER A  20     -11.703  -3.450  -3.304  1.00  6.80           N  
ATOM     74  CA  SER A  20     -11.538  -4.573  -4.174  1.00  6.28           C  
ATOM     75  C   SER A  20     -10.329  -4.512  -5.043  1.00  8.45           C  
ATOM     76  O   SER A  20     -10.223  -5.401  -5.887  1.00  7.26           O  
ATOM     77  N   ASP A  21      -9.482  -3.472  -4.951  1.00  7.50           N  
ATOM     78  CA  ASP A  21      -8.154  -3.581  -5.472  1.00  7.70           C  
ATOM     79  C   ASP A  21      -7.332  -4.493  -4.628  1.00  7.08           C  
ATOM     80  O   ASP A  21      -7.571  -4.771  -3.454  1.00  8.11           O  
ATOM     81  N   THR A  22      -6.321  -5.028  -5.335  1.00  5.37           N  
ATOM     82  CA  THR A  22      -5.295  -5.826  -4.738  1.00  6.01           C  
ATOM     83  C   THR A  22      -4.236  -4.919  -4.214  1.00  8.01           C  
ATOM     84  O   THR A  22      -4.090  -3.733  -4.505  1.00  8.11           O  
ATOM     85  N   ILE A  23      -3.405  -5.456  -3.303  1.00  8.32           N  
ATOM     86  CA  ILE A  23      -2.149  -4.888  -2.923  1.00  9.92           C  
ATOM     87  C   ILE A  23      -1.189  -4.673  -4.042  1.00 10.01           C  
ATOM     88  O   ILE A  23      -0.403  -3.731  -4.127  1.00  8.71           O  
ATOM     89  N   GLU A  24      -1.267  -5.501  -5.099  1.00  9.54           N  
ATOM     90  CA  GLU A  24      -0.458  -5.332  -6.266  1.00 11.81           C  
ATOM     91  C   GLU A  24      -0.780  -4.028  -6.911  1.00 11.14           C  
ATOM     92  O   GLU A  24       0.147  -3.315  -7.292  1.00 10.62           O  
ATOM     93  N   ASN A  25      -2.074  -3.706  -7.083  1.00  9.43           N  
ATOM     94  CA  ASN A  25      -2.544  -2.471  -7.630  1.00 10.96           C  
ATOM     95  C   ASN A  25      -1.983  -1.272  -6.947  1.00  9.68           C  
ATOM     96  O   ASN A  25      -1.463  -0.356  -7.583  1.00  9.33           O  
ATOM     97  N   VAL A  26      -2.118  -1.239  -5.609  1.00  6.52           N  
ATOM     98  CA  VAL A  26      -1.547  -0.264  -4.732  1.00  5.53           C  
ATOM     99  C   VAL A  26      -0.119   0.038  -5.032  1.00  4.42           C  
ATOM    100  O   VAL A  26       0.314   1.189  -5.054  1.00  3.40           O  
ATOM    101  N   LYS A  27       0.666  -1.048  -5.146  1.00  2.64           N  
ATOM    102  CA  LYS A  27       2.056  -0.904  -5.450  1.00  4.14           C  
ATOM    103  C   LYS A  27       2.351  -0.230  -6.746  1.00  5.58           C  
ATOM    104  O   LYS A  27       3.356   0.446  -6.957  1.00  4.11           O  
ATOM    105  N   ALA A  28       1.518  -0.484  -7.771  1.00  6.61           N  
ATOM    106  CA  ALA A  28       1.544   0.237  -9.005  1.00  7.74           C  
ATOM    107  C   ALA A  28       1.312   1.707  -8.919  1.00  9.17           C  
ATOM    108  O   ALA A  28       1.940   2.511  -9.605  1.00 11.45           O  
ATOM    109  N   LYS A  29       0.385   2.129  -8.040  1.00  8.96           N  
ATOM    110  CA  LYS A  29       0.108   3.524  -7.897  1.00  7.90           C  
ATOM    111  C   LYS A  29       1.233   4.360  -7.390  1.00  6.92           C  
ATOM    112  O   LYS A  29       1.524   5.437  -7.908  1.00  6.87           O  
ATOM    113  N   ILE A  30       1.974   3.812  -6.410  1.00  4.57           N  
ATOM    114  CA  ILE A  30       3.216   4.133  -5.780  1.00  5.58           C  
ATOM    115  C   ILE A  30       4.325   4.142  -6.776  1.00  7.26           C  
ATOM    116  O   ILE A  30       5.174   5.031  -6.765  1.00  9.46           O  
ATOM    117  N   GLN A  31       4.365   3.116  -7.645  1.00  7.06           N  
ATOM    118  CA  GLN A  31       5.351   2.913  -8.661  1.00  8.67           C  
ATOM    119  C   GLN A  31       5.507   4.079  -9.575  1.00 10.90           C  
ATOM    120  O   GLN A  31       6.616   4.533  -9.851  1.00  9.63           O  
ATOM    121  N   ASP A  32       4.348   4.567 -10.051  1.00 10.93           N  
ATOM    122  CA  ASP A  32       4.335   5.709 -10.911  1.00 14.01           C  
ATOM    123  C   ASP A  32       4.839   6.986 -10.330  1.00 14.04           C  
ATOM    124  O   ASP A  32       5.502   7.766 -11.011  1.00 13.39           O  
ATOM    125  N   LYS A  33       4.578   7.215  -9.031  1.00 14.22           N  
ATOM    126  CA  LYS A  33       4.881   8.464  -8.405  1.00 14.00           C  
ATOM    127  C   LYS A  33       6.263   8.567  -7.858  1.00 12.37           C  
ATOM    128  O   LYS A  33       7.039   9.480  -8.135  1.00 12.17           O  
ATOM    129  N   GLU A  34       6.655   7.497  -7.144  1.00 10.11           N  
ATOM    130  CA  GLU A  34       7.949   7.356  -6.550  1.00 10.07           C  
ATOM    131  C   GLU A  34       9.025   6.957  -7.500  1.00  9.32           C  
ATOM    132  O   GLU A  34      10.016   7.667  -7.660  1.00 11.61           O  
ATOM    133  N   GLY A  35       8.803   5.828  -8.197  1.00  7.22           N  
ATOM    134  CA  GLY A  35       9.747   5.221  -9.084  1.00  6.29           C  
ATOM    135  C   GLY A  35      10.409   4.067  -8.414  1.00  6.93           C  
ATOM    136  O   GLY A  35      11.625   3.902  -8.504  1.00  7.41           O  
ATOM    137  N   ILE A  36       9.635   3.211  -7.724  1.00  5.86           N  
ATOM    138  CA  ILE A  36      10.157   2.065  -7.046  1.00  6.07           C  
ATOM    139  C   ILE A  36       9.374   0.916  -7.582  1.00  6.36           C  
ATOM    140  O   ILE A  36       8.149   0.987  -7.663  1.00  6.18           O  
ATOM    141  N   PRO A  37       9.992  -0.120  -8.068  1.00  8.65           N  
ATOM    142  CA  PRO A  37       9.274  -1.249  -8.582  1.00  9.18           C  
ATOM    143  C   PRO A  37       8.510  -2.049  -7.583  1.00  9.85           C  
ATOM    144  O   PRO A  37       8.793  -1.850  -6.403  1.00  8.51           O  
ATOM    145  N   PRO A  38       7.539  -2.846  -7.917  1.00  8.71           N  
ATOM    146  CA  PRO A  38       6.642  -3.474  -6.991  1.00  9.08           C  
ATOM    147  C   PRO A  38       7.342  -4.526  -6.199  1.00  9.28           C  
ATOM    148  O   PRO A  38       6.883  -4.834  -5.101  1.00  6.50           O  
ATOM    149  N   ASP A  39       8.407  -5.146  -6.737  1.00 11.20           N  
ATOM    150  CA  ASP A  39       9.109  -6.199  -6.072  1.00 14.96           C  
ATOM    151  C   ASP A  39       9.996  -5.620  -5.025  1.00 13.99           C  
ATOM    152  O   ASP A  39      10.085  -6.215  -3.952  1.00 13.75           O  
ATOM    153  N   GLN A  40      10.613  -4.454  -5.287  1.00 11.60           N  
ATOM    154  CA  GLN A  40      11.478  -3.712  -4.423  1.00 10.76           C  
ATOM    155  C   GLN A  40      10.872  -3.267  -3.137  1.00  8.01           C  
ATOM    156  O   GLN A  40      11.461  -3.281  -2.057  1.00  8.96           O  
ATOM    157  N   GLN A  41       9.561  -2.974  -3.204  1.00  6.52           N  
ATOM    158  CA  GLN A  41       8.785  -2.582  -2.069  1.00  3.87           C  
ATOM    159  C   GLN A  41       7.963  -3.647  -1.428  1.00  4.79           C  
ATOM    160  O   GLN A  41       7.441  -4.580  -2.035  1.00  6.34           O  
ATOM    161  N   ARG A  42       7.843  -3.555  -0.091  1.00  5.73           N  
ATOM    162  CA  ARG A  42       6.919  -4.224   0.772  1.00  6.97           C  
ATOM    163  C   ARG A  42       6.035  -3.189   1.378  1.00  7.15           C  
ATOM    164  O   ARG A  42       6.382  -2.010   1.430  1.00  7.33           O  
ATOM    165  N   LEU A  43       4.809  -3.589   1.761  1.00  4.65           N  
ATOM    166  CA  LEU A  43       3.769  -2.707   2.192  1.00  3.51           C  
ATOM    167  C   LEU A  43       3.150  -3.257   3.431  1.00  5.56           C  
ATOM    168  O   LEU A  43       2.595  -4.355   3.452  1.00  4.19           O  
ATOM    169  N   ILE A  44       3.254  -2.597   4.598  1.00  4.58           N  
ATOM    170  CA  ILE A  44       2.875  -3.036   5.906  1.00  5.55           C  
ATOM    171  C   ILE A  44       1.604  -2.413   6.369  1.00  5.46           C  
ATOM    172  O   ILE A  44       1.455  -1.192   6.358  1.00  6.04           O  
ATOM    173  N   PHE A  45       0.638  -3.229   6.827  1.00  6.75           N  
ATOM    174  CA  PHE A  45      -0.452  -2.824   7.660  1.00  4.70           C  
ATOM    175  C   PHE A  45      -0.251  -3.397   9.021  1.00  6.34           C  
ATOM    176  O   PHE A  45       0.059  -4.575   9.193  1.00  5.45           O  
ATOM    177  N   ALA A  46      -0.319  -2.582  10.089  1.00  6.53           N  
ATOM    178  CA  ALA A  46       0.076  -2.960  11.410  1.00  7.15           C  
ATOM    179  C   ALA A  46       1.472  -3.479  11.455  1.00  9.00           C  
ATOM    180  O   ALA A  46       2.440  -2.720  11.426  1.00 11.15           O  
ATOM    181  N   GLY A  47       1.632  -4.799  11.657  1.00  9.35           N  
ATOM    182  CA  GLY A  47       2.932  -5.395  11.640  1.00 11.68           C  
ATOM    183  C   GLY A  47       2.924  -6.562  10.715  1.00 11.14           C  
ATOM    184  O   GLY A  47       3.576  -7.560  11.019  1.00 13.93           O  
ATOM    185  N   LYS A  48       2.111  -6.522   9.644  1.00 10.47           N  
ATOM    186  CA  LYS A  48       1.856  -7.616   8.760  1.00  8.82           C  
ATOM    187  C   LYS A  48       2.219  -7.267   7.358  1.00  7.68           C  
ATOM    188  O   LYS A  48       1.778  -6.273   6.783  1.00  6.47           O  
ATOM    189  N   GLN A  49       3.097  -8.097   6.767  1.00  8.89           N  
ATOM    190  CA  GLN A  49       3.532  -8.037   5.406  1.00  7.18           C  
ATOM    191  C   GLN A  49       2.482  -8.571   4.494  1.00  8.23           C  
ATOM    192  O   GLN A  49       2.259  -9.777   4.409  1.00  9.70           O  
ATOM    193  N   LEU A  50       1.811  -7.683   3.738  1.00  6.51           N  
ATOM    194  CA  LEU A  50       0.702  -8.016   2.899  1.00  7.41           C  
ATOM    195  C   LEU A  50       1.149  -8.548   1.580  1.00  8.27           C  
ATOM    196  O   LEU A  50       2.121  -8.073   0.995  1.00  8.34           O  
ATOM    197  N   GLU A  51       0.516  -9.624   1.078  1.00  9.43           N  
ATOM    198  CA  GLU A  51       0.868 -10.270  -0.148  1.00 11.90           C  
ATOM    199  C   GLU A  51       0.072  -9.731  -1.286  1.00 11.49           C  
ATOM    200  O   GLU A  51      -0.957  -9.069  -1.164  1.00  9.88           O  
ATOM    201  N   ASP A  52       0.570  -9.911  -2.523  1.00 12.71           N  
ATOM    202  CA  ASP A  52       0.215  -9.079  -3.631  1.00 16.56           C  
ATOM    203  C   ASP A  52      -1.176  -9.409  -4.052  1.00 15.83           C  
ATOM    204  O   ASP A  52      -2.064  -8.576  -4.229  1.00 17.21           O  
ATOM    205  N   GLY A  53      -1.531 -10.705  -4.096  1.00 15.00           N  
ATOM    206  CA  GLY A  53      -2.713 -11.163  -4.757  1.00 11.77           C  
ATOM    207  C   GLY A  53      -3.836 -11.440  -3.817  1.00 11.10           C  
ATOM    208  O   GLY A  53      -4.587 -12.387  -4.045  1.00 11.25           O  
ATOM    209  N   ARG A  54      -3.962 -10.519  -2.845  1.00  8.53           N  
ATOM    210  CA  ARG A  54      -5.112 -10.396  -2.004  1.00  9.05           C  
ATOM    211  C   ARG A  54      -5.664  -9.019  -2.142  1.00  8.96           C  
ATOM    212  O   ARG A  54      -4.914  -8.137  -2.558  1.00 11.60           O  
ATOM    213  N   THR A  55      -6.939  -8.774  -1.793  1.00  9.05           N  
ATOM    214  CA  THR A  55      -7.564  -7.495  -1.663  1.00  9.03           C  
ATOM    215  C   THR A  55      -7.414  -6.815  -0.345  1.00  8.15           C  
ATOM    216  O   THR A  55      -7.044  -7.426   0.656  1.00  5.91           O  
ATOM    217  N   LEU A  56      -7.770  -5.520  -0.269  1.00  6.91           N  
ATOM    218  CA  LEU A  56      -7.883  -4.790   0.956  1.00  8.29           C  
ATOM    219  C   LEU A  56      -9.028  -5.276   1.775  1.00  8.05           C  
ATOM    220  O   LEU A  56      -8.979  -5.292   3.004  1.00 10.17           O  
ATOM    221  N   SER A  57     -10.037  -5.839   1.087  1.00  8.92           N  
ATOM    222  CA  SER A  57     -11.184  -6.501   1.629  1.00  9.00           C  
ATOM    223  C   SER A  57     -11.019  -7.881   2.165  1.00  9.44           C  
ATOM    224  O   SER A  57     -11.450  -8.183   3.277  1.00 10.91           O  
ATOM    225  N   ASP A  58     -10.245  -8.762   1.506  1.00  9.11           N  
ATOM    226  CA  ASP A  58      -9.653  -9.927   2.086  1.00  7.91           C  
ATOM    227  C   ASP A  58      -9.034  -9.779   3.433  1.00  9.12           C  
ATOM    228  O   ASP A  58      -9.220 -10.584   4.345  1.00  8.61           O  
ATOM    229  N   TYR A  59      -8.202  -8.737   3.611  1.00  7.97           N  
ATOM    230  CA  TYR A  59      -7.668  -8.330   4.873  1.00  8.45           C  
ATOM    231  C   TYR A  59      -8.496  -7.539   5.827  1.00 10.98           C  
ATOM    232  O   TYR A  59      -8.195  -7.378   7.009  1.00 12.95           O  
ATOM    233  N   ASN A  60      -9.682  -7.138   5.335  1.00 12.38           N  
ATOM    234  CA  ASN A  60     -10.544  -6.199   5.983  1.00 13.94           C  
ATOM    235  C   ASN A  60      -9.975  -4.877   6.372  1.00 14.16           C  
ATOM    236  O   ASN A  60     -10.294  -4.353   7.438  1.00 14.26           O  
ATOM    237  N   ILE A  61      -9.127  -4.268   5.525  1.00 11.08           N  
ATOM    238  CA  ILE A  61      -8.470  -3.027   5.794  1.00 11.78           C  
ATOM    239  C   ILE A  61      -9.478  -1.978   5.472  1.00 13.74           C  
ATOM    240  O   ILE A  61      -9.925  -1.869   4.331  1.00 14.60           O  
ATOM    241  N   GLN A  62      -9.863  -1.163   6.471  1.00 13.97           N  
ATOM    242  CA  GLN A  62     -10.882  -0.175   6.303  1.00 15.52           C  
ATOM    243  C   GLN A  62     -10.401   1.082   5.662  1.00 13.94           C  
ATOM    244  O   GLN A  62      -9.240   1.329   5.342  1.00 12.15           O  
ATOM    245  N   LYS A  63     -11.295   2.086   5.620  1.00 11.73           N  
ATOM    246  CA  LYS A  63     -11.031   3.405   5.135  1.00 11.97           C  
ATOM    247  C   LYS A  63     -10.213   4.211   6.084  1.00 10.41           C  
ATOM    248  O   LYS A  63     -10.290   3.939   7.281  1.00  9.59           O  
ATOM    249  N   GLU A  64      -9.351   5.087   5.539  1.00 10.04           N  
ATOM    250  CA  GLU A  64      -8.502   5.927   6.326  1.00 10.94           C  
ATOM    251  C   GLU A  64      -7.471   5.204   7.122  1.00  9.74           C  
ATOM    252  O   GLU A  64      -7.124   5.629   8.223  1.00  9.42           O  
ATOM    253  N   SER A  65      -7.035   4.052   6.582  1.00  6.85           N  
ATOM    254  CA  SER A  65      -6.057   3.186   7.165  1.00  6.90           C  
ATOM    255  C   SER A  65      -4.761   3.844   6.838  1.00  4.72           C  
ATOM    256  O   SER A  65      -4.575   4.436   5.776  1.00  3.91           O  
ATOM    257  N   THR A  66      -3.767   3.592   7.709  1.00  4.48           N  
ATOM    258  CA  THR A  66      -2.385   3.951   7.629  1.00  3.80           C  
ATOM    259  C   THR A  66      -1.608   2.739   7.244  1.00  4.60           C  
ATOM    260  O   THR A  66      -1.822   1.687   7.844  1.00  5.33           O  
ATOM    261  N   LEU A  67      -0.814   2.755   6.159  1.00  4.17           N  
ATOM    262  CA  LEU A  67       0.042   1.694   5.725  1.00  3.85           C  
ATOM    263  C   LEU A  67       1.447   2.188   5.779  1.00  3.80           C  
ATOM    264  O   LEU A  67       1.722   3.387   5.803  1.00  5.54           O  
ATOM    265  N   HIS A  68       2.452   1.295   5.773  1.00  2.94           N  
ATOM    266  CA  HIS A  68       3.839   1.645   5.797  1.00  4.17           C  
ATOM    267  C   HIS A  68       4.542   1.143   4.583  1.00  5.32           C  
ATOM    268  O   HIS A  68       4.539  -0.043   4.259  1.00  7.70           O  
ATOM    269  N   LEU A  69       5.259   2.017   3.853  1.00  5.29           N  
ATOM    270  CA  LEU A  69       6.085   1.757   2.716  1.00  3.97           C  
ATOM    271  C   LEU A  69       7.489   1.378   3.039  1.00  5.07           C  
ATOM    272  O   LEU A  69       8.291   2.226   3.427  1.00  4.34           O  
ATOM    273  N   VAL A  70       7.861   0.098   2.855  1.00  4.29           N  
ATOM    274  CA  VAL A  70       9.117  -0.439   3.277  1.00  6.26           C  
ATOM    275  C   VAL A  70       9.808  -0.994   2.079  1.00  9.22           C  
ATOM    276  O   VAL A  70       9.293  -1.854   1.367  1.00  9.36           O  
TER
ENDMDL
MODEL      13
ATOM      1  N   GLN A   2     -11.366   3.587  -2.199  1.00  9.27           N  
ATOM      2  CA  GLN A   2     -10.293   4.508  -1.987  1.00  9.07           C  
ATOM      3  C   GLN A   2      -9.661   4.109  -0.698  1.00  8.72           C  
ATOM      4  O   GLN A   2     -10.345   3.935   0.310  1.00  8.22           O  
ATOM      5  N   ILE A   3      -8.354   3.793  -0.715  1.00  5.87           N  
ATOM      6  CA  ILE A   3      -7.652   3.600   0.516  1.00  5.07           C  
ATOM      7  C   ILE A   3      -6.719   4.750   0.678  1.00  4.01           C  
ATOM      8  O   ILE A   3      -6.468   5.478  -0.281  1.00  4.61           O  
ATOM      9  N   PHE A   4      -6.179   4.957   1.892  1.00  4.55           N  
ATOM     10  CA  PHE A   4      -5.283   6.060   2.053  1.00  4.68           C  
ATOM     11  C   PHE A   4      -3.969   5.429   2.362  1.00  5.30           C  
ATOM     12  O   PHE A   4      -3.735   5.148   3.537  1.00  5.58           O  
ATOM     13  N   VAL A   5      -2.984   5.381   1.447  1.00  4.44           N  
ATOM     14  CA  VAL A   5      -1.629   5.043   1.756  1.00  3.87           C  
ATOM     15  C   VAL A   5      -0.895   6.269   2.179  1.00  4.93           C  
ATOM     16  O   VAL A   5      -0.751   7.305   1.531  1.00  6.84           O  
ATOM     17  N   LYS A   6      -0.300   6.178   3.381  1.00  6.04           N  
ATOM     18  CA  LYS A   6       0.342   7.286   4.018  1.00  6.12           C  
ATOM     19  C   LYS A   6       1.814   7.071   3.925  1.00  6.57           C  
ATOM     20  O   LYS A   6       2.317   5.978   4.176  1.00  5.76           O  
ATOM     21  N   THR A   7       2.522   8.152   3.551  1.00  7.41           N  
ATOM     22  CA  THR A   7       3.946   8.289   3.562  1.00  7.48           C  
ATOM     23  C   THR A   7       4.477   8.496   4.938  1.00  8.75           C  
ATOM     24  O   THR A   7       3.775   8.872   5.876  1.00  8.58           O  
ATOM     25  N   LEU A   8       5.778   8.267   5.192  1.00  9.84           N  
ATOM     26  CA  LEU A   8       6.439   8.485   6.441  1.00 14.15           C  
ATOM     27  C   LEU A   8       6.400   9.883   6.955  1.00 17.37           C  
ATOM     28  O   LEU A   8       6.181  10.104   8.145  1.00 17.01           O  
ATOM     29  N   THR A   9       6.515  10.862   6.040  1.00 18.33           N  
ATOM     30  CA  THR A   9       6.263  12.227   6.386  1.00 19.24           C  
ATOM     31  C   THR A   9       4.843  12.546   6.705  1.00 19.48           C  
ATOM     32  O   THR A   9       4.426  12.835   7.825  1.00 23.14           O  
ATOM     33  N   GLY A  10       3.931  12.424   5.724  1.00 19.43           N  
ATOM     34  CA  GLY A  10       2.515  12.575   5.853  1.00 18.74           C  
ATOM     35  C   GLY A  10       2.021  13.294   4.645  1.00 17.62           C  
ATOM     36  O   GLY A  10       1.494  14.394   4.800  1.00 19.74           O  
ATOM     37  N   LYS A  11       2.005  12.640   3.469  1.00 13.56           N  
ATOM     38  CA  LYS A  11       0.987  12.924   2.506  1.00 11.91           C  
ATOM     39  C   LYS A  11      -0.076  11.883   2.427  1.00 10.18           C  
ATOM     40  O   LYS A  11       0.152  10.726   2.777  1.00  9.10           O  
ATOM     41  N   THR A  12      -1.294  12.107   1.901  1.00  9.63           N  
ATOM     42  CA  THR A  12      -2.294  11.136   1.583  1.00  9.85           C  
ATOM     43  C   THR A  12      -2.049  10.746   0.166  1.00 11.66           C  
ATOM     44  O   THR A  12      -2.264  11.549  -0.741  1.00 12.33           O  
ATOM     45  N   ILE A  13      -1.756   9.458  -0.089  1.00 10.42           N  
ATOM     46  CA  ILE A  13      -1.992   8.896  -1.382  1.00 11.84           C  
ATOM     47  C   ILE A  13      -3.296   8.176  -1.333  1.00 10.55           C  
ATOM     48  O   ILE A  13      -3.501   7.173  -0.651  1.00 11.92           O  
ATOM     49  N   THR A  14      -4.180   8.693  -2.205  1.00  9.39           N  
ATOM     50  CA  THR A  14      -5.493   8.158  -2.394  1.00  9.63           C  
ATOM     51  C   THR A  14      -5.435   7.299  -3.610  1.00 11.20           C  
ATOM     52  O   THR A  14      -5.516   7.753  -4.750  1.00 11.63           O  
ATOM     53  N   LEU A  15      -5.518   5.986  -3.331  1.00  8.29           N  
ATOM     54  CA  LEU A  15      -5.548   4.897  -4.258  1.00  9.03           C  
ATOM     55  C   LEU A  15      -6.866   4.220  -4.418  1.00  8.59           C  
ATOM     56  O   LEU A  15      -7.343   3.509  -3.535  1.00  7.79           O  
ATOM     57  N   GLU A  16      -7.376   4.324  -5.658  1.00 11.04           N  
ATOM     58  CA  GLU A  16      -8.494   3.509  -6.019  1.00 11.50           C  
ATOM     59  C   GLU A  16      -8.043   2.122  -6.323  1.00 10.13           C  
ATOM     60  O   GLU A  16      -7.458   1.921  -7.385  1.00  9.83           O  
ATOM     61  N   VAL A  17      -8.416   1.134  -5.489  1.00  8.99           N  
ATOM     62  CA  VAL A  17      -8.271  -0.254  -5.802  1.00  8.85           C  
ATOM     63  C   VAL A  17      -9.532  -0.982  -5.482  1.00  8.04           C  
ATOM     64  O   VAL A  17     -10.262  -0.597  -4.570  1.00  8.99           O  
ATOM     65  N   GLU A  18      -9.749  -2.157  -6.099  1.00  7.29           N  
ATOM     66  CA  GLU A  18     -10.919  -2.954  -5.901  1.00  7.08           C  
ATOM     67  C   GLU A  18     -10.374  -4.193  -5.279  1.00  6.45           C  
ATOM     68  O   GLU A  18      -9.292  -4.584  -5.716  1.00  5.28           O  
ATOM     69  N   PRO A  19     -11.146  -4.871  -4.483  1.00  7.24           N  
ATOM     70  CA  PRO A  19     -10.491  -5.761  -3.570  1.00  7.07           C  
ATOM     71  C   PRO A  19      -9.998  -7.012  -4.212  1.00  6.65           C  
ATOM     72  O   PRO A  19      -9.196  -7.658  -3.539  1.00  6.37           O  
ATOM     73  N   SER A  20     -10.357  -7.509  -5.409  1.00  6.80           N  
ATOM     74  CA  SER A  20      -9.770  -8.588  -6.141  1.00  6.28           C  
ATOM     75  C   SER A  20      -8.425  -8.254  -6.689  1.00  8.45           C  
ATOM     76  O   SER A  20      -7.644  -9.068  -7.181  1.00  7.26           O  
ATOM     77  N   ASP A  21      -8.051  -6.963  -6.720  1.00  7.50           N  
ATOM     78  CA  ASP A  21      -6.804  -6.528  -7.270  1.00  7.70           C  
ATOM     79  C   ASP A  21      -5.770  -6.821  -6.238  1.00  7.08           C  
ATOM     80  O   ASP A  21      -6.005  -6.888  -5.032  1.00  8.11           O  
ATOM     81  N   THR A  22      -4.529  -7.166  -6.624  1.00  5.37           N  
ATOM     82  CA  THR A  22      -3.461  -7.499  -5.733  1.00  6.01           C  
ATOM     83  C   THR A  22      -2.761  -6.358  -5.079  1.00  8.01           C  
ATOM     84  O   THR A  22      -2.941  -5.190  -5.423  1.00  8.11           O  
ATOM     85  N   ILE A  23      -1.946  -6.705  -4.067  1.00  8.32           N  
ATOM     86  CA  ILE A  23      -1.081  -5.795  -3.383  1.00  9.92           C  
ATOM     87  C   ILE A  23      -0.052  -5.261  -4.318  1.00 10.01           C  
ATOM     88  O   ILE A  23       0.250  -4.073  -4.210  1.00  8.71           O  
ATOM     89  N   GLU A  24       0.562  -6.011  -5.251  1.00  9.54           N  
ATOM     90  CA  GLU A  24       1.395  -5.470  -6.279  1.00 11.81           C  
ATOM     91  C   GLU A  24       0.751  -4.359  -7.033  1.00 11.14           C  
ATOM     92  O   GLU A  24       1.385  -3.360  -7.369  1.00 10.62           O  
ATOM     93  N   ASN A  25      -0.557  -4.470  -7.327  1.00  9.43           N  
ATOM     94  CA  ASN A  25      -1.334  -3.472  -7.994  1.00 10.96           C  
ATOM     95  C   ASN A  25      -1.324  -2.162  -7.284  1.00  9.68           C  
ATOM     96  O   ASN A  25      -1.095  -1.121  -7.899  1.00  9.33           O  
ATOM     97  N   VAL A  26      -1.369  -2.193  -5.940  1.00  6.52           N  
ATOM     98  CA  VAL A  26      -1.307  -1.069  -5.058  1.00  5.53           C  
ATOM     99  C   VAL A  26      -0.070  -0.272  -5.288  1.00  4.42           C  
ATOM    100  O   VAL A  26      -0.021   0.937  -5.507  1.00  3.40           O  
ATOM    101  N   LYS A  27       1.035  -1.034  -5.203  1.00  2.64           N  
ATOM    102  CA  LYS A  27       2.372  -0.643  -5.526  1.00  4.14           C  
ATOM    103  C   LYS A  27       2.687  -0.120  -6.885  1.00  5.58           C  
ATOM    104  O   LYS A  27       3.444   0.841  -7.019  1.00  4.11           O  
ATOM    105  N   ALA A  28       2.051  -0.685  -7.927  1.00  6.61           N  
ATOM    106  CA  ALA A  28       2.230  -0.185  -9.255  1.00  7.74           C  
ATOM    107  C   ALA A  28       1.595   1.149  -9.452  1.00  9.17           C  
ATOM    108  O   ALA A  28       2.060   2.014 -10.192  1.00 11.45           O  
ATOM    109  N   LYS A  29       0.482   1.350  -8.724  1.00  8.96           N  
ATOM    110  CA  LYS A  29      -0.218   2.588  -8.872  1.00  7.90           C  
ATOM    111  C   LYS A  29       0.481   3.625  -8.062  1.00  6.92           C  
ATOM    112  O   LYS A  29       0.309   4.802  -8.373  1.00  6.87           O  
ATOM    113  N   ILE A  30       1.179   3.273  -6.967  1.00  4.57           N  
ATOM    114  CA  ILE A  30       2.201   4.091  -6.393  1.00  5.58           C  
ATOM    115  C   ILE A  30       3.329   4.416  -7.311  1.00  7.26           C  
ATOM    116  O   ILE A  30       3.811   5.547  -7.347  1.00  9.46           O  
ATOM    117  N   GLN A  31       3.841   3.466  -8.114  1.00  7.06           N  
ATOM    118  CA  GLN A  31       4.830   3.640  -9.132  1.00  8.67           C  
ATOM    119  C   GLN A  31       4.431   4.487 -10.291  1.00 10.90           C  
ATOM    120  O   GLN A  31       5.228   5.186 -10.916  1.00  9.63           O  
ATOM    121  N   ASP A  32       3.127   4.610 -10.596  1.00 10.93           N  
ATOM    122  CA  ASP A  32       2.483   5.549 -11.461  1.00 14.01           C  
ATOM    123  C   ASP A  32       2.626   6.921 -10.898  1.00 14.04           C  
ATOM    124  O   ASP A  32       3.100   7.819 -11.591  1.00 13.39           O  
ATOM    125  N   LYS A  33       2.109   7.140  -9.675  1.00 14.22           N  
ATOM    126  CA  LYS A  33       2.063   8.401  -9.003  1.00 14.00           C  
ATOM    127  C   LYS A  33       3.332   8.956  -8.453  1.00 12.37           C  
ATOM    128  O   LYS A  33       3.713  10.069  -8.813  1.00 12.17           O  
ATOM    129  N   GLU A  34       4.056   8.242  -7.573  1.00 10.11           N  
ATOM    130  CA  GLU A  34       5.280   8.661  -6.963  1.00 10.07           C  
ATOM    131  C   GLU A  34       6.518   8.218  -7.662  1.00  9.32           C  
ATOM    132  O   GLU A  34       7.319   9.065  -8.056  1.00 11.61           O  
ATOM    133  N   GLY A  35       6.689   6.913  -7.939  1.00  7.22           N  
ATOM    134  CA  GLY A  35       7.763   6.388  -8.724  1.00  6.29           C  
ATOM    135  C   GLY A  35       8.548   5.285  -8.102  1.00  6.93           C  
ATOM    136  O   GLY A  35       9.593   4.818  -8.552  1.00  7.41           O  
ATOM    137  N   ILE A  36       8.090   4.894  -6.899  1.00  5.86           N  
ATOM    138  CA  ILE A  36       8.626   3.876  -6.050  1.00  6.07           C  
ATOM    139  C   ILE A  36       8.462   2.508  -6.616  1.00  6.36           C  
ATOM    140  O   ILE A  36       7.307   2.246  -6.949  1.00  6.18           O  
ATOM    141  N   PRO A  37       9.391   1.614  -6.782  1.00  8.65           N  
ATOM    142  CA  PRO A  37       9.149   0.307  -7.319  1.00  9.18           C  
ATOM    143  C   PRO A  37       8.392  -0.618  -6.429  1.00  9.85           C  
ATOM    144  O   PRO A  37       8.493  -0.340  -5.236  1.00  8.51           O  
ATOM    145  N   PRO A  38       7.689  -1.630  -6.844  1.00  8.71           N  
ATOM    146  CA  PRO A  38       7.032  -2.535  -5.946  1.00  9.08           C  
ATOM    147  C   PRO A  38       8.027  -3.242  -5.092  1.00  9.28           C  
ATOM    148  O   PRO A  38       7.699  -3.422  -3.920  1.00  6.50           O  
ATOM    149  N   ASP A  39       9.195  -3.655  -5.617  1.00 11.20           N  
ATOM    150  CA  ASP A  39      10.332  -4.177  -4.925  1.00 14.96           C  
ATOM    151  C   ASP A  39      11.054  -3.292  -3.967  1.00 13.99           C  
ATOM    152  O   ASP A  39      11.922  -3.774  -3.241  1.00 13.75           O  
ATOM    153  N   GLN A  40      10.778  -1.980  -3.863  1.00 11.60           N  
ATOM    154  CA  GLN A  40      11.376  -1.106  -2.903  1.00 10.76           C  
ATOM    155  C   GLN A  40      10.509  -0.988  -1.697  1.00  8.01           C  
ATOM    156  O   GLN A  40      11.021  -0.889  -0.583  1.00  8.96           O  
ATOM    157  N   GLN A  41       9.173  -1.066  -1.832  1.00  6.52           N  
ATOM    158  CA  GLN A  41       8.233  -0.817  -0.784  1.00  3.87           C  
ATOM    159  C   GLN A  41       7.548  -2.032  -0.259  1.00  4.79           C  
ATOM    160  O   GLN A  41       7.502  -3.054  -0.942  1.00  6.34           O  
ATOM    161  N   ARG A  42       7.092  -1.974   1.005  1.00  5.73           N  
ATOM    162  CA  ARG A  42       6.037  -2.853   1.403  1.00  6.97           C  
ATOM    163  C   ARG A  42       5.035  -2.061   2.169  1.00  7.15           C  
ATOM    164  O   ARG A  42       5.371  -0.950   2.576  1.00  7.33           O  
ATOM    165  N   LEU A  43       3.800  -2.542   2.399  1.00  4.65           N  
ATOM    166  CA  LEU A  43       2.666  -1.915   3.004  1.00  3.51           C  
ATOM    167  C   LEU A  43       2.404  -2.625   4.287  1.00  5.56           C  
ATOM    168  O   LEU A  43       2.501  -3.845   4.409  1.00  4.19           O  
ATOM    169  N   ILE A  44       2.124  -1.828   5.334  1.00  4.58           N  
ATOM    170  CA  ILE A  44       1.851  -2.316   6.650  1.00  5.55           C  
ATOM    171  C   ILE A  44       0.442  -1.951   6.970  1.00  5.46           C  
ATOM    172  O   ILE A  44       0.060  -0.786   6.865  1.00  6.04           O  
ATOM    173  N   PHE A  45      -0.435  -2.915   7.299  1.00  6.75           N  
ATOM    174  CA  PHE A  45      -1.805  -2.622   7.589  1.00  4.70           C  
ATOM    175  C   PHE A  45      -1.920  -2.959   9.036  1.00  6.34           C  
ATOM    176  O   PHE A  45      -1.819  -4.117   9.440  1.00  5.45           O  
ATOM    177  N   ALA A  46      -2.104  -1.964   9.921  1.00  6.53           N  
ATOM    178  CA  ALA A  46      -1.937  -2.045  11.339  1.00  7.15           C  
ATOM    179  C   ALA A  46      -0.611  -2.554  11.788  1.00  9.00           C  
ATOM    180  O   ALA A  46       0.243  -1.723  12.092  1.00 11.15           O  
ATOM    181  N   GLY A  47      -0.310  -3.863  11.715  1.00  9.35           N  
ATOM    182  CA  GLY A  47       1.019  -4.340  11.934  1.00 11.68           C  
ATOM    183  C   GLY A  47       1.475  -5.459  11.062  1.00 11.14           C  
ATOM    184  O   GLY A  47       2.538  -6.030  11.302  1.00 13.93           O  
ATOM    185  N   LYS A  48       0.667  -5.781  10.036  1.00 10.47           N  
ATOM    186  CA  LYS A  48       0.937  -6.855   9.131  1.00  8.82           C  
ATOM    187  C   LYS A  48       1.344  -6.271   7.822  1.00  7.68           C  
ATOM    188  O   LYS A  48       0.624  -5.569   7.114  1.00  6.47           O  
ATOM    189  N   GLN A  49       2.550  -6.740   7.455  1.00  8.89           N  
ATOM    190  CA  GLN A  49       3.128  -6.453   6.179  1.00  7.18           C  
ATOM    191  C   GLN A  49       2.605  -7.361   5.120  1.00  8.23           C  
ATOM    192  O   GLN A  49       2.630  -8.585   5.229  1.00  9.70           O  
ATOM    193  N   LEU A  50       2.005  -6.722   4.100  1.00  6.51           N  
ATOM    194  CA  LEU A  50       1.187  -7.444   3.176  1.00  7.41           C  
ATOM    195  C   LEU A  50       2.018  -8.020   2.081  1.00  8.27           C  
ATOM    196  O   LEU A  50       3.099  -7.467   1.883  1.00  8.34           O  
ATOM    197  N   GLU A  51       1.640  -9.090   1.359  1.00  9.43           N  
ATOM    198  CA  GLU A  51       2.422  -9.785   0.384  1.00 11.90           C  
ATOM    199  C   GLU A  51       1.909  -9.542  -0.993  1.00 11.49           C  
ATOM    200  O   GLU A  51       0.702  -9.513  -1.232  1.00  9.88           O  
ATOM    201  N   ASP A  52       2.798  -9.413  -1.993  1.00 12.71           N  
ATOM    202  CA  ASP A  52       2.593  -8.865  -3.298  1.00 16.56           C  
ATOM    203  C   ASP A  52       1.542  -9.531  -4.117  1.00 15.83           C  
ATOM    204  O   ASP A  52       0.678  -8.918  -4.744  1.00 17.21           O  
ATOM    205  N   GLY A  53       1.635 -10.872  -4.161  1.00 15.00           N  
ATOM    206  CA  GLY A  53       0.715 -11.670  -4.912  1.00 11.77           C  
ATOM    207  C   GLY A  53      -0.654 -11.872  -4.360  1.00 11.10           C  
ATOM    208  O   GLY A  53      -1.498 -12.458  -5.036  1.00 11.25           O  
ATOM    209  N   ARG A  54      -0.944 -11.362  -3.149  1.00  8.53           N  
ATOM    210  CA  ARG A  54      -2.215 -11.540  -2.519  1.00  9.05           C  
ATOM    211  C   ARG A  54      -3.072 -10.341  -2.737  1.00  8.96           C  
ATOM    212  O   ARG A  54      -2.652  -9.304  -3.246  1.00 11.60           O  
ATOM    213  N   THR A  55      -4.365 -10.437  -2.379  1.00  9.05           N  
ATOM    214  CA  THR A  55      -5.385  -9.482  -2.684  1.00  9.03           C  
ATOM    215  C   THR A  55      -5.790  -8.680  -1.495  1.00  8.15           C  
ATOM    216  O   THR A  55      -5.717  -9.168  -0.369  1.00  5.91           O  
ATOM    217  N   LEU A  56      -6.452  -7.520  -1.659  1.00  6.91           N  
ATOM    218  CA  LEU A  56      -6.967  -6.734  -0.581  1.00  8.29           C  
ATOM    219  C   LEU A  56      -8.028  -7.403   0.223  1.00  8.05           C  
ATOM    220  O   LEU A  56      -8.236  -7.122   1.402  1.00 10.17           O  
ATOM    221  N   SER A  57      -8.748  -8.362  -0.387  1.00  8.92           N  
ATOM    222  CA  SER A  57      -9.808  -9.145   0.168  1.00  9.00           C  
ATOM    223  C   SER A  57      -9.309 -10.230   1.059  1.00  9.44           C  
ATOM    224  O   SER A  57      -9.930 -10.632   2.041  1.00 10.91           O  
ATOM    225  N   ASP A  58      -8.106 -10.780   0.816  1.00  9.11           N  
ATOM    226  CA  ASP A  58      -7.461 -11.764   1.630  1.00  7.91           C  
ATOM    227  C   ASP A  58      -7.149 -11.225   2.983  1.00  9.12           C  
ATOM    228  O   ASP A  58      -7.252 -11.921   3.992  1.00  8.61           O  
ATOM    229  N   TYR A  59      -6.661  -9.973   3.032  1.00  7.97           N  
ATOM    230  CA  TYR A  59      -6.521  -9.278   4.274  1.00  8.45           C  
ATOM    231  C   TYR A  59      -7.664  -8.470   4.783  1.00 10.98           C  
ATOM    232  O   TYR A  59      -7.491  -7.748   5.764  1.00 12.95           O  
ATOM    233  N   ASN A  60      -8.828  -8.519   4.110  1.00 12.38           N  
ATOM    234  CA  ASN A  60     -10.056  -7.862   4.433  1.00 13.94           C  
ATOM    235  C   ASN A  60      -9.880  -6.390   4.577  1.00 14.16           C  
ATOM    236  O   ASN A  60     -10.302  -5.801   5.571  1.00 14.26           O  
ATOM    237  N   ILE A  61      -9.417  -5.729   3.501  1.00 11.08           N  
ATOM    238  CA  ILE A  61      -9.229  -4.312   3.462  1.00 11.78           C  
ATOM    239  C   ILE A  61     -10.455  -3.749   2.828  1.00 13.74           C  
ATOM    240  O   ILE A  61     -10.859  -4.169   1.744  1.00 14.60           O  
ATOM    241  N   GLN A  62     -11.150  -2.835   3.527  1.00 13.97           N  
ATOM    242  CA  GLN A  62     -12.283  -2.183   2.948  1.00 15.52           C  
ATOM    243  C   GLN A  62     -11.960  -0.800   2.496  1.00 13.94           C  
ATOM    244  O   GLN A  62     -10.842  -0.296   2.590  1.00 12.15           O  
ATOM    245  N   LYS A  63     -12.948  -0.018   2.027  1.00 11.73           N  
ATOM    246  CA  LYS A  63     -12.814   1.371   1.715  1.00 11.97           C  
ATOM    247  C   LYS A  63     -12.320   2.242   2.819  1.00 10.41           C  
ATOM    248  O   LYS A  63     -12.488   1.894   3.987  1.00  9.59           O  
ATOM    249  N   GLU A  64     -11.592   3.347   2.580  1.00 10.04           N  
ATOM    250  CA  GLU A  64     -11.265   4.278   3.616  1.00 10.94           C  
ATOM    251  C   GLU A  64     -10.340   3.721   4.643  1.00  9.74           C  
ATOM    252  O   GLU A  64     -10.462   4.012   5.831  1.00  9.42           O  
ATOM    253  N   SER A  65      -9.494   2.804   4.140  1.00  6.85           N  
ATOM    254  CA  SER A  65      -8.539   2.152   4.982  1.00  6.90           C  
ATOM    255  C   SER A  65      -7.210   2.826   5.001  1.00  4.72           C  
ATOM    256  O   SER A  65      -6.676   3.100   3.928  1.00  3.91           O  
ATOM    257  N   THR A  66      -6.545   3.103   6.137  1.00  4.48           N  
ATOM    258  CA  THR A  66      -5.268   3.746   6.147  1.00  3.80           C  
ATOM    259  C   THR A  66      -4.218   2.690   6.104  1.00  4.60           C  
ATOM    260  O   THR A  66      -4.236   1.752   6.900  1.00  5.33           O  
ATOM    261  N   LEU A  67      -3.333   2.805   5.098  1.00  4.17           N  
ATOM    262  CA  LEU A  67      -2.221   1.940   4.854  1.00  3.85           C  
ATOM    263  C   LEU A  67      -0.922   2.614   5.136  1.00  3.80           C  
ATOM    264  O   LEU A  67      -0.845   3.826   4.943  1.00  5.54           O  
ATOM    265  N   HIS A  68       0.099   1.977   5.738  1.00  2.94           N  
ATOM    266  CA  HIS A  68       1.368   2.611   5.920  1.00  4.17           C  
ATOM    267  C   HIS A  68       2.409   2.264   4.912  1.00  5.32           C  
ATOM    268  O   HIS A  68       2.546   1.090   4.569  1.00  7.70           O  
ATOM    269  N   LEU A  69       3.147   3.266   4.402  1.00  5.29           N  
ATOM    270  CA  LEU A  69       4.145   3.047   3.402  1.00  3.97           C  
ATOM    271  C   LEU A  69       5.493   2.967   4.030  1.00  5.07           C  
ATOM    272  O   LEU A  69       5.940   3.827   4.788  1.00  4.34           O  
ATOM    273  N   VAL A  70       6.199   1.857   3.747  1.00  4.29           N  
ATOM    274  CA  VAL A  70       7.540   1.654   4.198  1.00  6.26           C  
ATOM    275  C   VAL A  70       8.391   1.165   3.077  1.00  9.22           C  
ATOM    276  O   VAL A  70       7.869   0.531   2.161  1.00  9.36           O  
TER
ENDMDL
MODEL      14
ATOM      1  N   GLN A   2     -11.126   5.715  -0.465  1.00  9.27           N  
ATOM      2  CA  GLN A   2      -9.737   6.011  -0.303  1.00  9.07           C  
ATOM      3  C   GLN A   2      -9.027   5.602   0.943  1.00  8.72           C  
ATOM      4  O   GLN A   2      -9.647   5.315   1.966  1.00  8.22           O  
ATOM      5  N   ILE A   3      -7.698   5.459   0.800  1.00  5.87           N  
ATOM      6  CA  ILE A   3      -6.786   5.101   1.842  1.00  5.07           C  
ATOM      7  C   ILE A   3      -5.576   5.954   1.668  1.00  4.01           C  
ATOM      8  O   ILE A   3      -5.291   6.346   0.538  1.00  4.61           O  
ATOM      9  N   PHE A   4      -4.804   6.218   2.737  1.00  4.55           N  
ATOM     10  CA  PHE A   4      -3.610   7.003   2.712  1.00  4.68           C  
ATOM     11  C   PHE A   4      -2.492   6.028   2.860  1.00  5.30           C  
ATOM     12  O   PHE A   4      -2.501   5.354   3.888  1.00  5.58           O  
ATOM     13  N   VAL A   5      -1.485   6.016   1.968  1.00  4.44           N  
ATOM     14  CA  VAL A   5      -0.342   5.167   2.095  1.00  3.87           C  
ATOM     15  C   VAL A   5       0.866   5.994   2.372  1.00  4.93           C  
ATOM     16  O   VAL A   5       1.213   6.879   1.591  1.00  6.84           O  
ATOM     17  N   LYS A   6       1.347   5.886   3.623  1.00  6.04           N  
ATOM     18  CA  LYS A   6       2.328   6.808   4.104  1.00  6.12           C  
ATOM     19  C   LYS A   6       3.686   6.212   3.960  1.00  6.57           C  
ATOM     20  O   LYS A   6       3.853   5.035   4.275  1.00  5.76           O  
ATOM     21  N   THR A   7       4.634   7.029   3.468  1.00  7.41           N  
ATOM     22  CA  THR A   7       5.998   6.648   3.270  1.00  7.48           C  
ATOM     23  C   THR A   7       6.766   6.638   4.547  1.00  8.75           C  
ATOM     24  O   THR A   7       6.271   7.015   5.608  1.00  8.58           O  
ATOM     25  N   LEU A   8       8.006   6.119   4.507  1.00  9.84           N  
ATOM     26  CA  LEU A   8       8.891   6.060   5.628  1.00 14.15           C  
ATOM     27  C   LEU A   8       9.120   7.326   6.379  1.00 17.37           C  
ATOM     28  O   LEU A   8       8.862   7.468   7.574  1.00 17.01           O  
ATOM     29  N   THR A   9       9.575   8.375   5.672  1.00 18.33           N  
ATOM     30  CA  THR A   9       9.842   9.644   6.275  1.00 19.24           C  
ATOM     31  C   THR A   9       8.586  10.445   6.315  1.00 19.48           C  
ATOM     32  O   THR A   9       8.041  10.616   7.404  1.00 23.14           O  
ATOM     33  N   GLY A  10       8.067  10.987   5.198  1.00 19.43           N  
ATOM     34  CA  GLY A  10       7.100  12.038   5.133  1.00 18.74           C  
ATOM     35  C   GLY A  10       6.516  12.391   3.808  1.00 17.62           C  
ATOM     36  O   GLY A  10       6.461  13.563   3.438  1.00 19.74           O  
ATOM     37  N   LYS A  11       6.035  11.472   2.951  1.00 13.56           N  
ATOM     38  CA  LYS A  11       5.080  11.677   1.907  1.00 11.91           C  
ATOM     39  C   LYS A  11       3.796  11.000   2.241  1.00 10.18           C  
ATOM     40  O   LYS A  11       3.756   9.980   2.928  1.00  9.10           O  
ATOM     41  N   THR A  12       2.662  11.447   1.672  1.00  9.63           N  
ATOM     42  CA  THR A  12       1.428  10.752   1.874  1.00  9.85           C  
ATOM     43  C   THR A  12       0.911  10.570   0.489  1.00 11.66           C  
ATOM     44  O   THR A  12       0.885  11.488  -0.329  1.00 12.33           O  
ATOM     45  N   ILE A  13       0.422   9.344   0.233  1.00 10.42           N  
ATOM     46  CA  ILE A  13      -0.106   9.010  -1.054  1.00 11.84           C  
ATOM     47  C   ILE A  13      -1.523   8.576  -0.899  1.00 10.55           C  
ATOM     48  O   ILE A  13      -1.790   7.472  -0.428  1.00 11.92           O  
ATOM     49  N   THR A  14      -2.473   9.367  -1.428  1.00  9.39           N  
ATOM     50  CA  THR A  14      -3.872   9.091  -1.318  1.00  9.63           C  
ATOM     51  C   THR A  14      -4.346   8.222  -2.432  1.00 11.20           C  
ATOM     52  O   THR A  14      -4.350   8.605  -3.601  1.00 11.63           O  
ATOM     53  N   LEU A  15      -4.629   6.949  -2.106  1.00  8.29           N  
ATOM     54  CA  LEU A  15      -4.956   5.955  -3.081  1.00  9.03           C  
ATOM     55  C   LEU A  15      -6.339   5.406  -3.158  1.00  8.59           C  
ATOM     56  O   LEU A  15      -6.938   4.882  -2.220  1.00  7.79           O  
ATOM     57  N   GLU A  16      -7.066   5.702  -4.250  1.00 11.04           N  
ATOM     58  CA  GLU A  16      -8.435   5.315  -4.396  1.00 11.50           C  
ATOM     59  C   GLU A  16      -8.567   3.918  -4.897  1.00 10.13           C  
ATOM     60  O   GLU A  16      -7.993   3.484  -5.895  1.00  9.83           O  
ATOM     61  N   VAL A  17      -9.187   3.063  -4.064  1.00  8.99           N  
ATOM     62  CA  VAL A  17      -9.203   1.639  -4.194  1.00  8.85           C  
ATOM     63  C   VAL A  17     -10.580   1.134  -3.931  1.00  8.04           C  
ATOM     64  O   VAL A  17     -11.484   1.919  -3.651  1.00  8.99           O  
ATOM     65  N   GLU A  18     -10.875  -0.175  -4.032  1.00  7.29           N  
ATOM     66  CA  GLU A  18     -12.063  -0.820  -3.565  1.00  7.08           C  
ATOM     67  C   GLU A  18     -11.719  -1.823  -2.518  1.00  6.45           C  
ATOM     68  O   GLU A  18     -10.583  -2.290  -2.578  1.00  5.28           O  
ATOM     69  N   PRO A  19     -12.554  -2.306  -1.647  1.00  7.24           N  
ATOM     70  CA  PRO A  19     -12.190  -3.043  -0.471  1.00  7.07           C  
ATOM     71  C   PRO A  19     -11.880  -4.456  -0.828  1.00  6.65           C  
ATOM     72  O   PRO A  19     -11.413  -5.233   0.004  1.00  6.37           O  
ATOM     73  N   SER A  20     -12.094  -4.902  -2.078  1.00  6.80           N  
ATOM     74  CA  SER A  20     -11.747  -6.167  -2.648  1.00  6.28           C  
ATOM     75  C   SER A  20     -10.387  -6.235  -3.253  1.00  8.45           C  
ATOM     76  O   SER A  20      -9.971  -7.321  -3.653  1.00  7.26           O  
ATOM     77  N   ASP A  21      -9.667  -5.103  -3.353  1.00  7.50           N  
ATOM     78  CA  ASP A  21      -8.402  -5.106  -4.020  1.00  7.70           C  
ATOM     79  C   ASP A  21      -7.354  -5.852  -3.267  1.00  7.08           C  
ATOM     80  O   ASP A  21      -7.589  -6.214  -2.116  1.00  8.11           O  
ATOM     81  N   THR A  22      -6.173  -6.124  -3.851  1.00  5.37           N  
ATOM     82  CA  THR A  22      -5.067  -6.833  -3.286  1.00  6.01           C  
ATOM     83  C   THR A  22      -3.971  -5.868  -2.991  1.00  8.01           C  
ATOM     84  O   THR A  22      -3.937  -4.799  -3.599  1.00  8.11           O  
ATOM     85  N   ILE A  23      -2.960  -6.239  -2.186  1.00  8.32           N  
ATOM     86  CA  ILE A  23      -1.778  -5.486  -1.903  1.00  9.92           C  
ATOM     87  C   ILE A  23      -1.035  -5.111  -3.139  1.00 10.01           C  
ATOM     88  O   ILE A  23      -0.697  -3.943  -3.324  1.00  8.71           O  
ATOM     89  N   GLU A  24      -0.839  -6.091  -4.039  1.00  9.54           N  
ATOM     90  CA  GLU A  24      -0.208  -6.003  -5.319  1.00 11.81           C  
ATOM     91  C   GLU A  24      -0.855  -5.081  -6.295  1.00 11.14           C  
ATOM     92  O   GLU A  24      -0.126  -4.369  -6.984  1.00 10.62           O  
ATOM     93  N   ASN A  25      -2.184  -4.873  -6.328  1.00  9.43           N  
ATOM     94  CA  ASN A  25      -2.836  -3.769  -6.963  1.00 10.96           C  
ATOM     95  C   ASN A  25      -2.585  -2.437  -6.344  1.00  9.68           C  
ATOM     96  O   ASN A  25      -2.295  -1.450  -7.018  1.00  9.33           O  
ATOM     97  N   VAL A  26      -2.611  -2.313  -5.005  1.00  6.52           N  
ATOM     98  CA  VAL A  26      -2.255  -1.079  -4.377  1.00  5.53           C  
ATOM     99  C   VAL A  26      -0.821  -0.722  -4.566  1.00  4.42           C  
ATOM    100  O   VAL A  26      -0.555   0.477  -4.636  1.00  3.40           O  
ATOM    101  N   LYS A  27       0.140  -1.651  -4.719  1.00  2.64           N  
ATOM    102  CA  LYS A  27       1.528  -1.444  -4.995  1.00  4.14           C  
ATOM    103  C   LYS A  27       1.719  -1.004  -6.406  1.00  5.58           C  
ATOM    104  O   LYS A  27       2.534  -0.099  -6.574  1.00  4.11           O  
ATOM    105  N   ALA A  28       0.912  -1.484  -7.369  1.00  6.61           N  
ATOM    106  CA  ALA A  28       0.777  -1.048  -8.725  1.00  7.74           C  
ATOM    107  C   ALA A  28       0.358   0.370  -8.911  1.00  9.17           C  
ATOM    108  O   ALA A  28       0.854   1.007  -9.839  1.00 11.45           O  
ATOM    109  N   LYS A  29      -0.498   0.970  -8.065  1.00  8.96           N  
ATOM    110  CA  LYS A  29      -0.749   2.366  -7.880  1.00  7.90           C  
ATOM    111  C   LYS A  29       0.413   3.220  -7.505  1.00  6.92           C  
ATOM    112  O   LYS A  29       0.709   4.261  -8.089  1.00  6.87           O  
ATOM    113  N   ILE A  30       1.167   2.855  -6.453  1.00  4.57           N  
ATOM    114  CA  ILE A  30       2.377   3.500  -6.046  1.00  5.58           C  
ATOM    115  C   ILE A  30       3.442   3.471  -7.087  1.00  7.26           C  
ATOM    116  O   ILE A  30       4.217   4.417  -7.220  1.00  9.46           O  
ATOM    117  N   GLN A  31       3.540   2.310  -7.759  1.00  7.06           N  
ATOM    118  CA  GLN A  31       4.338   2.127  -8.932  1.00  8.67           C  
ATOM    119  C   GLN A  31       4.076   3.178  -9.955  1.00 10.90           C  
ATOM    120  O   GLN A  31       4.934   3.766 -10.611  1.00  9.63           O  
ATOM    121  N   ASP A  32       2.796   3.442 -10.273  1.00 10.93           N  
ATOM    122  CA  ASP A  32       2.518   4.425 -11.273  1.00 14.01           C  
ATOM    123  C   ASP A  32       2.900   5.831 -10.962  1.00 14.04           C  
ATOM    124  O   ASP A  32       3.562   6.570 -11.690  1.00 13.39           O  
ATOM    125  N   LYS A  33       2.514   6.198  -9.727  1.00 14.22           N  
ATOM    126  CA  LYS A  33       2.749   7.473  -9.124  1.00 14.00           C  
ATOM    127  C   LYS A  33       4.184   7.815  -8.916  1.00 12.37           C  
ATOM    128  O   LYS A  33       4.745   8.611  -9.667  1.00 12.17           O  
ATOM    129  N   GLU A  34       4.789   7.322  -7.820  1.00 10.11           N  
ATOM    130  CA  GLU A  34       6.162   7.472  -7.450  1.00 10.07           C  
ATOM    131  C   GLU A  34       7.116   6.937  -8.462  1.00  9.32           C  
ATOM    132  O   GLU A  34       7.895   7.685  -9.051  1.00 11.61           O  
ATOM    133  N   GLY A  35       7.103   5.613  -8.702  1.00  7.22           N  
ATOM    134  CA  GLY A  35       8.050   4.893  -9.495  1.00  6.29           C  
ATOM    135  C   GLY A  35       8.764   3.925  -8.615  1.00  6.93           C  
ATOM    136  O   GLY A  35       9.985   3.953  -8.469  1.00  7.41           O  
ATOM    137  N   ILE A  36       8.021   2.969  -8.029  1.00  5.86           N  
ATOM    138  CA  ILE A  36       8.541   1.923  -7.204  1.00  6.07           C  
ATOM    139  C   ILE A  36       8.107   0.558  -7.615  1.00  6.36           C  
ATOM    140  O   ILE A  36       6.893   0.372  -7.552  1.00  6.18           O  
ATOM    141  N   PRO A  37       8.898  -0.365  -8.074  1.00  8.65           N  
ATOM    142  CA  PRO A  37       8.358  -1.592  -8.583  1.00  9.18           C  
ATOM    143  C   PRO A  37       7.856  -2.511  -7.524  1.00  9.85           C  
ATOM    144  O   PRO A  37       8.380  -2.494  -6.411  1.00  8.51           O  
ATOM    145  N   PRO A  38       6.898  -3.385  -7.618  1.00  8.71           N  
ATOM    146  CA  PRO A  38       6.204  -4.093  -6.582  1.00  9.08           C  
ATOM    147  C   PRO A  38       7.019  -4.931  -5.658  1.00  9.28           C  
ATOM    148  O   PRO A  38       6.739  -5.057  -4.467  1.00  6.50           O  
ATOM    149  N   ASP A  39       8.087  -5.551  -6.191  1.00 11.20           N  
ATOM    150  CA  ASP A  39       8.939  -6.455  -5.482  1.00 14.96           C  
ATOM    151  C   ASP A  39       9.828  -5.725  -4.535  1.00 13.99           C  
ATOM    152  O   ASP A  39      10.176  -6.286  -3.498  1.00 13.75           O  
ATOM    153  N   GLN A  40      10.027  -4.422  -4.805  1.00 11.60           N  
ATOM    154  CA  GLN A  40      10.798  -3.525  -4.002  1.00 10.76           C  
ATOM    155  C   GLN A  40      10.091  -3.038  -2.784  1.00  8.01           C  
ATOM    156  O   GLN A  40      10.588  -2.759  -1.694  1.00  8.96           O  
ATOM    157  N   GLN A  41       8.756  -2.882  -2.815  1.00  6.52           N  
ATOM    158  CA  GLN A  41       7.891  -2.354  -1.805  1.00  3.87           C  
ATOM    159  C   GLN A  41       7.045  -3.425  -1.206  1.00  4.79           C  
ATOM    160  O   GLN A  41       6.493  -4.287  -1.887  1.00  6.34           O  
ATOM    161  N   ARG A  42       6.843  -3.372   0.122  1.00  5.73           N  
ATOM    162  CA  ARG A  42       5.803  -4.105   0.774  1.00  6.97           C  
ATOM    163  C   ARG A  42       4.987  -3.091   1.499  1.00  7.15           C  
ATOM    164  O   ARG A  42       5.473  -1.980   1.707  1.00  7.33           O  
ATOM    165  N   LEU A  43       3.850  -3.565   2.038  1.00  4.65           N  
ATOM    166  CA  LEU A  43       2.878  -2.779   2.732  1.00  3.51           C  
ATOM    167  C   LEU A  43       2.708  -3.371   4.088  1.00  5.56           C  
ATOM    168  O   LEU A  43       2.640  -4.587   4.265  1.00  4.19           O  
ATOM    169  N   ILE A  44       2.508  -2.520   5.110  1.00  4.58           N  
ATOM    170  CA  ILE A  44       2.332  -2.882   6.482  1.00  5.55           C  
ATOM    171  C   ILE A  44       1.110  -2.170   6.951  1.00  5.46           C  
ATOM    172  O   ILE A  44       0.820  -1.014   6.649  1.00  6.04           O  
ATOM    173  N   PHE A  45       0.263  -2.855   7.741  1.00  6.75           N  
ATOM    174  CA  PHE A  45      -0.851  -2.264   8.416  1.00  4.70           C  
ATOM    175  C   PHE A  45      -0.591  -2.340   9.881  1.00  6.34           C  
ATOM    176  O   PHE A  45      -0.753  -3.399  10.485  1.00  5.45           O  
ATOM    177  N   ALA A  46      -0.177  -1.202  10.466  1.00  6.53           N  
ATOM    178  CA  ALA A  46       0.395  -1.106  11.773  1.00  7.15           C  
ATOM    179  C   ALA A  46       1.632  -1.905  11.998  1.00  9.00           C  
ATOM    180  O   ALA A  46       2.705  -1.381  11.702  1.00 11.15           O  
ATOM    181  N   GLY A  47       1.574  -3.105  12.603  1.00  9.35           N  
ATOM    182  CA  GLY A  47       2.723  -3.934  12.798  1.00 11.68           C  
ATOM    183  C   GLY A  47       2.605  -5.145  11.938  1.00 11.14           C  
ATOM    184  O   GLY A  47       3.534  -5.949  11.888  1.00 13.93           O  
ATOM    185  N   LYS A  48       1.445  -5.319  11.280  1.00 10.47           N  
ATOM    186  CA  LYS A  48       1.150  -6.520  10.564  1.00  8.82           C  
ATOM    187  C   LYS A  48       1.613  -6.493   9.147  1.00  7.68           C  
ATOM    188  O   LYS A  48       1.271  -5.590   8.386  1.00  6.47           O  
ATOM    189  N   GLN A  49       2.494  -7.393   8.677  1.00  8.89           N  
ATOM    190  CA  GLN A  49       3.082  -7.329   7.375  1.00  7.18           C  
ATOM    191  C   GLN A  49       2.231  -8.013   6.360  1.00  8.23           C  
ATOM    192  O   GLN A  49       1.890  -9.187   6.497  1.00  9.70           O  
ATOM    193  N   LEU A  50       1.720  -7.269   5.362  1.00  6.51           N  
ATOM    194  CA  LEU A  50       0.723  -7.720   4.442  1.00  7.41           C  
ATOM    195  C   LEU A  50       1.309  -8.469   3.295  1.00  8.27           C  
ATOM    196  O   LEU A  50       2.286  -8.053   2.675  1.00  8.34           O  
ATOM    197  N   GLU A  51       0.829  -9.695   3.018  1.00  9.43           N  
ATOM    198  CA  GLU A  51       1.163 -10.552   1.924  1.00 11.90           C  
ATOM    199  C   GLU A  51       0.512 -10.177   0.637  1.00 11.49           C  
ATOM    200  O   GLU A  51      -0.684  -9.889   0.631  1.00  9.88           O  
ATOM    201  N   ASP A  52       1.318 -10.187  -0.439  1.00 12.71           N  
ATOM    202  CA  ASP A  52       1.129  -9.444  -1.646  1.00 16.56           C  
ATOM    203  C   ASP A  52      -0.132  -9.807  -2.352  1.00 15.83           C  
ATOM    204  O   ASP A  52      -0.834  -8.905  -2.806  1.00 17.21           O  
ATOM    205  N   GLY A  53      -0.447 -11.105  -2.512  1.00 15.00           N  
ATOM    206  CA  GLY A  53      -1.593 -11.609  -3.203  1.00 11.77           C  
ATOM    207  C   GLY A  53      -2.878 -11.653  -2.451  1.00 11.10           C  
ATOM    208  O   GLY A  53      -3.940 -11.949  -2.996  1.00 11.25           O  
ATOM    209  N   ARG A  54      -2.874 -11.380  -1.134  1.00  8.53           N  
ATOM    210  CA  ARG A  54      -3.990 -11.386  -0.240  1.00  9.05           C  
ATOM    211  C   ARG A  54      -4.842 -10.174  -0.398  1.00  8.96           C  
ATOM    212  O   ARG A  54      -4.445  -9.082  -0.801  1.00 11.60           O  
ATOM    213  N   THR A  55      -6.166 -10.269  -0.177  1.00  9.05           N  
ATOM    214  CA  THR A  55      -6.998  -9.127  -0.397  1.00  9.03           C  
ATOM    215  C   THR A  55      -6.941  -8.219   0.783  1.00  8.15           C  
ATOM    216  O   THR A  55      -6.506  -8.667   1.843  1.00  5.91           O  
ATOM    217  N   LEU A  56      -7.431  -6.974   0.650  1.00  6.91           N  
ATOM    218  CA  LEU A  56      -7.519  -6.114   1.789  1.00  8.29           C  
ATOM    219  C   LEU A  56      -8.538  -6.487   2.811  1.00  8.05           C  
ATOM    220  O   LEU A  56      -8.496  -6.055   3.962  1.00 10.17           O  
ATOM    221  N   SER A  57      -9.532  -7.312   2.438  1.00  8.92           N  
ATOM    222  CA  SER A  57     -10.696  -7.700   3.172  1.00  9.00           C  
ATOM    223  C   SER A  57     -10.383  -8.940   3.937  1.00  9.44           C  
ATOM    224  O   SER A  57     -11.066  -9.244   4.914  1.00 10.91           O  
ATOM    225  N   ASP A  58      -9.351  -9.762   3.675  1.00  9.11           N  
ATOM    226  CA  ASP A  58      -8.760 -10.779   4.487  1.00  7.91           C  
ATOM    227  C   ASP A  58      -8.068 -10.262   5.701  1.00  9.12           C  
ATOM    228  O   ASP A  58      -7.874 -10.971   6.687  1.00  8.61           O  
ATOM    229  N   TYR A  59      -7.698  -8.971   5.629  1.00  7.97           N  
ATOM    230  CA  TYR A  59      -7.118  -8.253   6.722  1.00  8.45           C  
ATOM    231  C   TYR A  59      -8.100  -7.325   7.351  1.00 10.98           C  
ATOM    232  O   TYR A  59      -7.946  -6.975   8.520  1.00 12.95           O  
ATOM    233  N   ASN A  60      -9.158  -6.975   6.599  1.00 12.38           N  
ATOM    234  CA  ASN A  60     -10.215  -6.090   6.980  1.00 13.94           C  
ATOM    235  C   ASN A  60      -9.737  -4.691   7.158  1.00 14.16           C  
ATOM    236  O   ASN A  60      -9.785  -4.159   8.267  1.00 14.26           O  
ATOM    237  N   ILE A  61      -9.209  -4.123   6.059  1.00 11.08           N  
ATOM    238  CA  ILE A  61      -8.618  -2.823   5.980  1.00 11.78           C  
ATOM    239  C   ILE A  61      -9.603  -1.884   5.372  1.00 13.74           C  
ATOM    240  O   ILE A  61      -9.888  -1.981   4.179  1.00 14.60           O  
ATOM    241  N   GLN A  62     -10.259  -1.021   6.168  1.00 13.97           N  
ATOM    242  CA  GLN A  62     -11.371  -0.266   5.679  1.00 15.52           C  
ATOM    243  C   GLN A  62     -11.021   0.984   4.947  1.00 13.94           C  
ATOM    244  O   GLN A  62      -9.841   1.133   4.632  1.00 12.15           O  
ATOM    245  N   LYS A  63     -11.950   1.933   4.734  1.00 11.73           N  
ATOM    246  CA  LYS A  63     -11.719   3.247   4.219  1.00 11.97           C  
ATOM    247  C   LYS A  63     -11.029   4.136   5.196  1.00 10.41           C  
ATOM    248  O   LYS A  63     -11.083   3.975   6.414  1.00  9.59           O  
ATOM    249  N   GLU A  64     -10.414   5.182   4.616  1.00 10.04           N  
ATOM    250  CA  GLU A  64      -9.713   6.264   5.235  1.00 10.94           C  
ATOM    251  C   GLU A  64      -8.657   5.739   6.146  1.00  9.74           C  
ATOM    252  O   GLU A  64      -8.193   6.455   7.032  1.00  9.42           O  
ATOM    253  N   SER A  65      -8.174   4.496   5.972  1.00  6.85           N  
ATOM    254  CA  SER A  65      -7.048   3.918   6.638  1.00  6.90           C  
ATOM    255  C   SER A  65      -5.722   4.523   6.328  1.00  4.72           C  
ATOM    256  O   SER A  65      -5.497   4.924   5.187  1.00  3.91           O  
ATOM    257  N   THR A  66      -4.807   4.691   7.299  1.00  4.48           N  
ATOM    258  CA  THR A  66      -3.433   5.085   7.253  1.00  3.80           C  
ATOM    259  C   THR A  66      -2.637   3.831   7.129  1.00  4.60           C  
ATOM    260  O   THR A  66      -2.679   3.106   8.122  1.00  5.33           O  
ATOM    261  N   LEU A  67      -1.896   3.646   6.022  1.00  4.17           N  
ATOM    262  CA  LEU A  67      -1.035   2.519   5.838  1.00  3.85           C  
ATOM    263  C   LEU A  67       0.392   2.947   5.839  1.00  3.80           C  
ATOM    264  O   LEU A  67       0.699   4.074   5.455  1.00  5.54           O  
ATOM    265  N   HIS A  68       1.293   1.956   5.957  1.00  2.94           N  
ATOM    266  CA  HIS A  68       2.687   2.274   5.912  1.00  4.17           C  
ATOM    267  C   HIS A  68       3.378   1.523   4.826  1.00  5.32           C  
ATOM    268  O   HIS A  68       3.124   0.325   4.705  1.00  7.70           O  
ATOM    269  N   LEU A  69       4.248   2.182   4.040  1.00  5.29           N  
ATOM    270  CA  LEU A  69       5.007   1.587   2.985  1.00  3.97           C  
ATOM    271  C   LEU A  69       6.332   1.204   3.550  1.00  5.07           C  
ATOM    272  O   LEU A  69       7.015   1.967   4.232  1.00  4.34           O  
ATOM    273  N   VAL A  70       6.889   0.000   3.329  1.00  4.29           N  
ATOM    274  CA  VAL A  70       8.290  -0.196   3.540  1.00  6.26           C  
ATOM    275  C   VAL A  70       8.870  -0.593   2.227  1.00  9.22           C  
ATOM    276  O   VAL A  70       8.185  -1.120   1.351  1.00  9.36           O  
TER
ENDMDL
MODEL      15
ATOM      1  N   GLN A   2     -11.493   3.325  -3.031  1.00  9.27           N  
ATOM      2  CA  GLN A   2     -10.387   4.192  -2.768  1.00  9.07           C  
ATOM      3  C   GLN A   2      -9.876   3.928  -1.394  1.00  8.72           C  
ATOM      4  O   GLN A   2     -10.606   3.742  -0.421  1.00  8.22           O  
ATOM      5  N   ILE A   3      -8.534   3.850  -1.351  1.00  5.87           N  
ATOM      6  CA  ILE A   3      -7.805   3.656  -0.136  1.00  5.07           C  
ATOM      7  C   ILE A   3      -6.846   4.793  -0.061  1.00  4.01           C  
ATOM      8  O   ILE A   3      -6.536   5.464  -1.044  1.00  4.61           O  
ATOM      9  N   PHE A   4      -6.377   5.096   1.163  1.00  4.55           N  
ATOM     10  CA  PHE A   4      -5.335   6.040   1.423  1.00  4.68           C  
ATOM     11  C   PHE A   4      -4.028   5.403   1.750  1.00  5.30           C  
ATOM     12  O   PHE A   4      -3.884   4.723   2.764  1.00  5.58           O  
ATOM     13  N   VAL A   5      -2.957   5.523   0.945  1.00  4.44           N  
ATOM     14  CA  VAL A   5      -1.591   5.206   1.224  1.00  3.87           C  
ATOM     15  C   VAL A   5      -1.021   6.530   1.602  1.00  4.93           C  
ATOM     16  O   VAL A   5      -0.890   7.500   0.857  1.00  6.84           O  
ATOM     17  N   LYS A   6      -0.598   6.571   2.878  1.00  6.04           N  
ATOM     18  CA  LYS A   6       0.022   7.624   3.622  1.00  6.12           C  
ATOM     19  C   LYS A   6       1.460   7.307   3.851  1.00  6.57           C  
ATOM     20  O   LYS A   6       1.750   6.161   4.190  1.00  5.76           O  
ATOM     21  N   THR A   7       2.353   8.286   3.620  1.00  7.41           N  
ATOM     22  CA  THR A   7       3.764   8.190   3.830  1.00  7.48           C  
ATOM     23  C   THR A   7       4.228   8.357   5.236  1.00  8.75           C  
ATOM     24  O   THR A   7       3.423   8.241   6.159  1.00  8.58           O  
ATOM     25  N   LEU A   8       5.553   8.410   5.463  1.00  9.84           N  
ATOM     26  CA  LEU A   8       6.171   8.525   6.747  1.00 14.15           C  
ATOM     27  C   LEU A   8       6.144   9.927   7.251  1.00 17.37           C  
ATOM     28  O   LEU A   8       5.928  10.272   8.412  1.00 17.01           O  
ATOM     29  N   THR A   9       6.432  10.869   6.335  1.00 18.33           N  
ATOM     30  CA  THR A   9       6.422  12.298   6.387  1.00 19.24           C  
ATOM     31  C   THR A   9       5.023  12.797   6.510  1.00 19.48           C  
ATOM     32  O   THR A   9       4.654  13.331   7.555  1.00 23.14           O  
ATOM     33  N   GLY A  10       4.185  12.685   5.464  1.00 19.43           N  
ATOM     34  CA  GLY A  10       2.878  13.261   5.539  1.00 18.74           C  
ATOM     35  C   GLY A  10       2.553  13.608   4.127  1.00 17.62           C  
ATOM     36  O   GLY A  10       2.264  14.783   3.903  1.00 19.74           O  
ATOM     37  N   LYS A  11       2.588  12.670   3.163  1.00 13.56           N  
ATOM     38  CA  LYS A  11       1.906  12.822   1.916  1.00 11.91           C  
ATOM     39  C   LYS A  11       0.877  11.751   1.799  1.00 10.18           C  
ATOM     40  O   LYS A  11       1.117  10.568   2.036  1.00  9.10           O  
ATOM     41  N   THR A  12      -0.264  12.053   1.156  1.00  9.63           N  
ATOM     42  CA  THR A  12      -1.319  11.108   0.951  1.00  9.85           C  
ATOM     43  C   THR A  12      -1.482  10.819  -0.501  1.00 11.66           C  
ATOM     44  O   THR A  12      -1.859  11.739  -1.226  1.00 12.33           O  
ATOM     45  N   ILE A  13      -1.263   9.551  -0.892  1.00 10.42           N  
ATOM     46  CA  ILE A  13      -1.448   9.011  -2.203  1.00 11.84           C  
ATOM     47  C   ILE A  13      -2.710   8.230  -2.073  1.00 10.55           C  
ATOM     48  O   ILE A  13      -2.707   7.139  -1.506  1.00 11.92           O  
ATOM     49  N   THR A  14      -3.826   8.764  -2.603  1.00  9.39           N  
ATOM     50  CA  THR A  14      -5.122   8.163  -2.547  1.00  9.63           C  
ATOM     51  C   THR A  14      -5.337   7.260  -3.712  1.00 11.20           C  
ATOM     52  O   THR A  14      -5.365   7.758  -4.836  1.00 11.63           O  
ATOM     53  N   LEU A  15      -5.429   5.923  -3.592  1.00  8.29           N  
ATOM     54  CA  LEU A  15      -5.241   5.008  -4.675  1.00  9.03           C  
ATOM     55  C   LEU A  15      -6.543   4.331  -4.933  1.00  8.59           C  
ATOM     56  O   LEU A  15      -7.319   4.137  -3.998  1.00  7.79           O  
ATOM     57  N   GLU A  16      -6.863   3.932  -6.176  1.00 11.04           N  
ATOM     58  CA  GLU A  16      -8.039   3.198  -6.530  1.00 11.50           C  
ATOM     59  C   GLU A  16      -7.803   1.763  -6.855  1.00 10.13           C  
ATOM     60  O   GLU A  16      -7.019   1.430  -7.742  1.00  9.83           O  
ATOM     61  N   VAL A  17      -8.407   0.832  -6.096  1.00  8.99           N  
ATOM     62  CA  VAL A  17      -8.253  -0.577  -6.292  1.00  8.85           C  
ATOM     63  C   VAL A  17      -9.546  -1.310  -6.188  1.00  8.04           C  
ATOM     64  O   VAL A  17     -10.620  -0.777  -5.912  1.00  8.99           O  
ATOM     65  N   GLU A  18      -9.556  -2.608  -6.543  1.00  7.29           N  
ATOM     66  CA  GLU A  18     -10.615  -3.528  -6.266  1.00  7.08           C  
ATOM     67  C   GLU A  18     -10.178  -4.484  -5.210  1.00  6.45           C  
ATOM     68  O   GLU A  18      -8.974  -4.519  -4.960  1.00  5.28           O  
ATOM     69  N   PRO A  19     -11.035  -5.219  -4.566  1.00  7.24           N  
ATOM     70  CA  PRO A  19     -10.659  -6.026  -3.441  1.00  7.07           C  
ATOM     71  C   PRO A  19      -9.834  -7.202  -3.835  1.00  6.65           C  
ATOM     72  O   PRO A  19      -9.076  -7.724  -3.019  1.00  6.37           O  
ATOM     73  N   SER A  20     -10.005  -7.618  -5.103  1.00  6.80           N  
ATOM     74  CA  SER A  20      -9.358  -8.694  -5.786  1.00  6.28           C  
ATOM     75  C   SER A  20      -7.937  -8.476  -6.177  1.00  8.45           C  
ATOM     76  O   SER A  20      -7.174  -9.345  -6.595  1.00  7.26           O  
ATOM     77  N   ASP A  21      -7.522  -7.212  -5.974  1.00  7.50           N  
ATOM     78  CA  ASP A  21      -6.181  -6.792  -6.236  1.00  7.70           C  
ATOM     79  C   ASP A  21      -5.264  -7.074  -5.096  1.00  7.08           C  
ATOM     80  O   ASP A  21      -5.674  -6.981  -3.940  1.00  8.11           O  
ATOM     81  N   THR A  22      -4.024  -7.464  -5.442  1.00  5.37           N  
ATOM     82  CA  THR A  22      -2.980  -7.854  -4.547  1.00  6.01           C  
ATOM     83  C   THR A  22      -2.265  -6.707  -3.921  1.00  8.01           C  
ATOM     84  O   THR A  22      -2.410  -5.525  -4.230  1.00  8.11           O  
ATOM     85  N   ILE A  23      -1.507  -7.026  -2.856  1.00  8.32           N  
ATOM     86  CA  ILE A  23      -0.712  -6.053  -2.173  1.00  9.92           C  
ATOM     87  C   ILE A  23       0.423  -5.638  -3.046  1.00 10.01           C  
ATOM     88  O   ILE A  23       0.769  -4.458  -3.053  1.00  8.71           O  
ATOM     89  N   GLU A  24       0.949  -6.542  -3.892  1.00  9.54           N  
ATOM     90  CA  GLU A  24       1.715  -6.234  -5.059  1.00 11.81           C  
ATOM     91  C   GLU A  24       1.097  -5.259  -6.001  1.00 11.14           C  
ATOM     92  O   GLU A  24       1.799  -4.426  -6.572  1.00 10.62           O  
ATOM     93  N   ASN A  25      -0.237  -5.284  -6.172  1.00  9.43           N  
ATOM     94  CA  ASN A  25      -0.889  -4.447  -7.131  1.00 10.96           C  
ATOM     95  C   ASN A  25      -0.909  -3.039  -6.643  1.00  9.68           C  
ATOM     96  O   ASN A  25      -0.745  -2.040  -7.342  1.00  9.33           O  
ATOM     97  N   VAL A  26      -1.066  -2.814  -5.327  1.00  6.52           N  
ATOM     98  CA  VAL A  26      -1.002  -1.568  -4.626  1.00  5.53           C  
ATOM     99  C   VAL A  26       0.377  -1.012  -4.711  1.00  4.42           C  
ATOM    100  O   VAL A  26       0.576   0.157  -5.039  1.00  3.40           O  
ATOM    101  N   LYS A  27       1.382  -1.884  -4.516  1.00  2.64           N  
ATOM    102  CA  LYS A  27       2.700  -1.400  -4.786  1.00  4.14           C  
ATOM    103  C   LYS A  27       2.985  -0.855  -6.144  1.00  5.58           C  
ATOM    104  O   LYS A  27       3.831   0.016  -6.337  1.00  4.11           O  
ATOM    105  N   ALA A  28       2.342  -1.423  -7.180  1.00  6.61           N  
ATOM    106  CA  ALA A  28       2.718  -1.173  -8.537  1.00  7.74           C  
ATOM    107  C   ALA A  28       2.324   0.215  -8.909  1.00  9.17           C  
ATOM    108  O   ALA A  28       2.929   0.944  -9.693  1.00 11.45           O  
ATOM    109  N   LYS A  29       1.246   0.651  -8.233  1.00  8.96           N  
ATOM    110  CA  LYS A  29       0.683   1.965  -8.274  1.00  7.90           C  
ATOM    111  C   LYS A  29       1.467   2.915  -7.435  1.00  6.92           C  
ATOM    112  O   LYS A  29       1.495   4.081  -7.825  1.00  6.87           O  
ATOM    113  N   ILE A  30       2.058   2.506  -6.298  1.00  4.57           N  
ATOM    114  CA  ILE A  30       2.883   3.369  -5.510  1.00  5.58           C  
ATOM    115  C   ILE A  30       4.157   3.674  -6.219  1.00  7.26           C  
ATOM    116  O   ILE A  30       4.715   4.770  -6.185  1.00  9.46           O  
ATOM    117  N   GLN A  31       4.682   2.712  -7.000  1.00  7.06           N  
ATOM    118  CA  GLN A  31       5.724   2.859  -7.968  1.00  8.67           C  
ATOM    119  C   GLN A  31       5.332   3.844  -9.015  1.00 10.90           C  
ATOM    120  O   GLN A  31       6.135   4.683  -9.418  1.00  9.63           O  
ATOM    121  N   ASP A  32       4.084   3.758  -9.510  1.00 10.93           N  
ATOM    122  CA  ASP A  32       3.601   4.516 -10.622  1.00 14.01           C  
ATOM    123  C   ASP A  32       3.557   5.965 -10.278  1.00 14.04           C  
ATOM    124  O   ASP A  32       3.934   6.789 -11.110  1.00 13.39           O  
ATOM    125  N   LYS A  33       3.116   6.334  -9.062  1.00 14.22           N  
ATOM    126  CA  LYS A  33       3.217   7.700  -8.652  1.00 14.00           C  
ATOM    127  C   LYS A  33       4.609   8.000  -8.214  1.00 12.37           C  
ATOM    128  O   LYS A  33       5.344   8.736  -8.871  1.00 12.17           O  
ATOM    129  N   GLU A  34       5.059   7.340  -7.131  1.00 10.11           N  
ATOM    130  CA  GLU A  34       6.155   7.810  -6.342  1.00 10.07           C  
ATOM    131  C   GLU A  34       7.513   7.350  -6.747  1.00  9.32           C  
ATOM    132  O   GLU A  34       8.506   7.942  -6.326  1.00 11.61           O  
ATOM    133  N   GLY A  35       7.664   6.246  -7.500  1.00  7.22           N  
ATOM    134  CA  GLY A  35       8.900   5.751  -8.020  1.00  6.29           C  
ATOM    135  C   GLY A  35       9.769   4.927  -7.133  1.00  6.93           C  
ATOM    136  O   GLY A  35      10.992   4.952  -7.263  1.00  7.41           O  
ATOM    137  N   ILE A  36       9.124   4.133  -6.260  1.00  5.86           N  
ATOM    138  CA  ILE A  36       9.819   3.207  -5.420  1.00  6.07           C  
ATOM    139  C   ILE A  36       9.599   1.799  -5.856  1.00  6.36           C  
ATOM    140  O   ILE A  36       8.463   1.330  -5.816  1.00  6.18           O  
ATOM    141  N   PRO A  37      10.612   1.032  -6.134  1.00  8.65           N  
ATOM    142  CA  PRO A  37      10.469  -0.368  -6.412  1.00  9.18           C  
ATOM    143  C   PRO A  37      10.002  -1.207  -5.273  1.00  9.85           C  
ATOM    144  O   PRO A  37      10.329  -0.842  -4.145  1.00  8.51           O  
ATOM    145  N   PRO A  38       9.272  -2.252  -5.529  1.00  8.71           N  
ATOM    146  CA  PRO A  38       8.255  -2.735  -4.641  1.00  9.08           C  
ATOM    147  C   PRO A  38       8.878  -3.469  -3.505  1.00  9.28           C  
ATOM    148  O   PRO A  38       8.256  -3.559  -2.448  1.00  6.50           O  
ATOM    149  N   ASP A  39      10.122  -3.961  -3.651  1.00 11.20           N  
ATOM    150  CA  ASP A  39      10.901  -4.565  -2.615  1.00 14.96           C  
ATOM    151  C   ASP A  39      11.398  -3.644  -1.555  1.00 13.99           C  
ATOM    152  O   ASP A  39      11.580  -3.994  -0.390  1.00 13.75           O  
ATOM    153  N   GLN A  40      11.605  -2.360  -1.900  1.00 11.60           N  
ATOM    154  CA  GLN A  40      12.076  -1.328  -1.030  1.00 10.76           C  
ATOM    155  C   GLN A  40      11.047  -0.694  -0.159  1.00  8.01           C  
ATOM    156  O   GLN A  40      11.306  -0.307   0.979  1.00  8.96           O  
ATOM    157  N   GLN A  41       9.777  -0.704  -0.604  1.00  6.52           N  
ATOM    158  CA  GLN A  41       8.647  -0.202   0.115  1.00  3.87           C  
ATOM    159  C   GLN A  41       7.991  -1.339   0.820  1.00  4.79           C  
ATOM    160  O   GLN A  41       7.995  -2.438   0.268  1.00  6.34           O  
ATOM    161  N   ARG A  42       7.305  -1.107   1.954  1.00  5.73           N  
ATOM    162  CA  ARG A  42       6.430  -2.048   2.581  1.00  6.97           C  
ATOM    163  C   ARG A  42       5.173  -1.365   2.996  1.00  7.15           C  
ATOM    164  O   ARG A  42       5.141  -0.139   2.900  1.00  7.33           O  
ATOM    165  N   LEU A  43       4.050  -1.982   3.407  1.00  4.65           N  
ATOM    166  CA  LEU A  43       2.813  -1.401   3.828  1.00  3.51           C  
ATOM    167  C   LEU A  43       2.354  -2.009   5.108  1.00  5.56           C  
ATOM    168  O   LEU A  43       2.221  -3.223   5.259  1.00  4.19           O  
ATOM    169  N   ILE A  44       2.014  -1.078   6.018  1.00  4.58           N  
ATOM    170  CA  ILE A  44       1.552  -1.348   7.344  1.00  5.55           C  
ATOM    171  C   ILE A  44       0.113  -0.987   7.483  1.00  5.46           C  
ATOM    172  O   ILE A  44      -0.211   0.195   7.373  1.00  6.04           O  
ATOM    173  N   PHE A  45      -0.771  -1.963   7.754  1.00  6.75           N  
ATOM    174  CA  PHE A  45      -2.146  -1.880   8.138  1.00  4.70           C  
ATOM    175  C   PHE A  45      -2.266  -1.983   9.619  1.00  6.34           C  
ATOM    176  O   PHE A  45      -2.283  -3.093  10.148  1.00  5.45           O  
ATOM    177  N   ALA A  46      -2.469  -0.835  10.290  1.00  6.53           N  
ATOM    178  CA  ALA A  46      -2.325  -0.630  11.698  1.00  7.15           C  
ATOM    179  C   ALA A  46      -1.103  -1.238  12.294  1.00  9.00           C  
ATOM    180  O   ALA A  46      -0.044  -0.614  12.345  1.00 11.15           O  
ATOM    181  N   GLY A  47      -1.166  -2.451  12.873  1.00  9.35           N  
ATOM    182  CA  GLY A  47      -0.183  -3.207  13.586  1.00 11.68           C  
ATOM    183  C   GLY A  47       0.367  -4.336  12.784  1.00 11.14           C  
ATOM    184  O   GLY A  47       1.416  -4.892  13.105  1.00 13.93           O  
ATOM    185  N   LYS A  48      -0.241  -4.712  11.645  1.00 10.47           N  
ATOM    186  CA  LYS A  48       0.196  -5.733  10.744  1.00  8.82           C  
ATOM    187  C   LYS A  48       0.825  -5.246   9.485  1.00  7.68           C  
ATOM    188  O   LYS A  48       0.488  -4.182   8.967  1.00  6.47           O  
ATOM    189  N   GLN A  49       1.767  -5.995   8.884  1.00  8.89           N  
ATOM    190  CA  GLN A  49       2.217  -5.662   7.568  1.00  7.18           C  
ATOM    191  C   GLN A  49       1.733  -6.683   6.597  1.00  8.23           C  
ATOM    192  O   GLN A  49       1.381  -7.825   6.887  1.00  9.70           O  
ATOM    193  N   LEU A  50       1.517  -6.181   5.368  1.00  6.51           N  
ATOM    194  CA  LEU A  50       0.871  -6.837   4.275  1.00  7.41           C  
ATOM    195  C   LEU A  50       1.812  -7.603   3.410  1.00  8.27           C  
ATOM    196  O   LEU A  50       2.654  -6.958   2.787  1.00  8.34           O  
ATOM    197  N   GLU A  51       1.658  -8.933   3.279  1.00  9.43           N  
ATOM    198  CA  GLU A  51       2.519  -9.653   2.393  1.00 11.90           C  
ATOM    199  C   GLU A  51       2.072  -9.486   0.982  1.00 11.49           C  
ATOM    200  O   GLU A  51       0.895  -9.315   0.668  1.00  9.88           O  
ATOM    201  N   ASP A  52       2.943  -9.533  -0.042  1.00 12.71           N  
ATOM    202  CA  ASP A  52       2.755  -8.962  -1.340  1.00 16.56           C  
ATOM    203  C   ASP A  52       1.823  -9.765  -2.181  1.00 15.83           C  
ATOM    204  O   ASP A  52       1.177  -9.144  -3.024  1.00 17.21           O  
ATOM    205  N   GLY A  53       1.659 -11.076  -1.933  1.00 15.00           N  
ATOM    206  CA  GLY A  53       0.918 -11.936  -2.803  1.00 11.77           C  
ATOM    207  C   GLY A  53      -0.378 -12.534  -2.375  1.00 11.10           C  
ATOM    208  O   GLY A  53      -0.809 -13.600  -2.812  1.00 11.25           O  
ATOM    209  N   ARG A  54      -1.032 -11.798  -1.458  1.00  8.53           N  
ATOM    210  CA  ARG A  54      -2.414 -11.912  -1.110  1.00  9.05           C  
ATOM    211  C   ARG A  54      -3.186 -10.721  -1.564  1.00  8.96           C  
ATOM    212  O   ARG A  54      -2.642  -9.770  -2.123  1.00 11.60           O  
ATOM    213  N   THR A  55      -4.517 -10.780  -1.378  1.00  9.05           N  
ATOM    214  CA  THR A  55      -5.360  -9.705  -1.799  1.00  9.03           C  
ATOM    215  C   THR A  55      -5.681  -8.736  -0.713  1.00  8.15           C  
ATOM    216  O   THR A  55      -5.576  -9.058   0.470  1.00  5.91           O  
ATOM    217  N   LEU A  56      -6.242  -7.573  -1.087  1.00  6.91           N  
ATOM    218  CA  LEU A  56      -6.794  -6.676  -0.119  1.00  8.29           C  
ATOM    219  C   LEU A  56      -7.922  -7.237   0.675  1.00  8.05           C  
ATOM    220  O   LEU A  56      -8.098  -6.887   1.841  1.00 10.17           O  
ATOM    221  N   SER A  57      -8.755  -8.106   0.075  1.00  8.92           N  
ATOM    222  CA  SER A  57      -9.777  -8.867   0.725  1.00  9.00           C  
ATOM    223  C   SER A  57      -9.288  -9.774   1.801  1.00  9.44           C  
ATOM    224  O   SER A  57      -9.855  -9.897   2.886  1.00 10.91           O  
ATOM    225  N   ASP A  58      -8.129 -10.389   1.506  1.00  9.11           N  
ATOM    226  CA  ASP A  58      -7.406 -11.300   2.339  1.00  7.91           C  
ATOM    227  C   ASP A  58      -7.016 -10.760   3.671  1.00  9.12           C  
ATOM    228  O   ASP A  58      -7.059 -11.521   4.637  1.00  8.61           O  
ATOM    229  N   TYR A  59      -6.646  -9.468   3.727  1.00  7.97           N  
ATOM    230  CA  TYR A  59      -6.193  -8.801   4.908  1.00  8.45           C  
ATOM    231  C   TYR A  59      -7.258  -7.831   5.291  1.00 10.98           C  
ATOM    232  O   TYR A  59      -7.206  -7.181   6.334  1.00 12.95           O  
ATOM    233  N   ASN A  60      -8.399  -7.838   4.580  1.00 12.38           N  
ATOM    234  CA  ASN A  60      -9.585  -7.222   5.089  1.00 13.94           C  
ATOM    235  C   ASN A  60      -9.441  -5.739   5.045  1.00 14.16           C  
ATOM    236  O   ASN A  60      -9.717  -5.025   6.008  1.00 14.26           O  
ATOM    237  N   ILE A  61      -8.937  -5.206   3.918  1.00 11.08           N  
ATOM    238  CA  ILE A  61      -8.977  -3.797   3.676  1.00 11.78           C  
ATOM    239  C   ILE A  61     -10.172  -3.422   2.870  1.00 13.74           C  
ATOM    240  O   ILE A  61     -10.480  -3.809   1.744  1.00 14.60           O  
ATOM    241  N   GLN A  62     -11.027  -2.560   3.449  1.00 13.97           N  
ATOM    242  CA  GLN A  62     -12.102  -1.932   2.745  1.00 15.52           C  
ATOM    243  C   GLN A  62     -11.668  -0.556   2.372  1.00 13.94           C  
ATOM    244  O   GLN A  62     -10.689   0.030   2.831  1.00 12.15           O  
ATOM    245  N   LYS A  63     -12.517   0.160   1.613  1.00 11.73           N  
ATOM    246  CA  LYS A  63     -12.497   1.568   1.360  1.00 11.97           C  
ATOM    247  C   LYS A  63     -12.180   2.467   2.505  1.00 10.41           C  
ATOM    248  O   LYS A  63     -12.586   2.201   3.635  1.00  9.59           O  
ATOM    249  N   GLU A  64     -11.486   3.595   2.271  1.00 10.04           N  
ATOM    250  CA  GLU A  64     -11.155   4.673   3.150  1.00 10.94           C  
ATOM    251  C   GLU A  64     -10.147   4.389   4.210  1.00  9.74           C  
ATOM    252  O   GLU A  64      -9.960   5.101   5.195  1.00  9.42           O  
ATOM    253  N   SER A  65      -9.514   3.207   4.097  1.00  6.85           N  
ATOM    254  CA  SER A  65      -8.562   2.600   4.974  1.00  6.90           C  
ATOM    255  C   SER A  65      -7.234   3.240   4.759  1.00  4.72           C  
ATOM    256  O   SER A  65      -6.888   3.636   3.647  1.00  3.91           O  
ATOM    257  N   THR A  66      -6.481   3.349   5.868  1.00  4.48           N  
ATOM    258  CA  THR A  66      -5.186   3.952   5.929  1.00  3.80           C  
ATOM    259  C   THR A  66      -4.148   2.882   5.930  1.00  4.60           C  
ATOM    260  O   THR A  66      -4.123   2.063   6.848  1.00  5.33           O  
ATOM    261  N   LEU A  67      -3.243   2.905   4.936  1.00  4.17           N  
ATOM    262  CA  LEU A  67      -2.019   2.166   4.966  1.00  3.85           C  
ATOM    263  C   LEU A  67      -0.905   3.116   5.245  1.00  3.80           C  
ATOM    264  O   LEU A  67      -0.836   4.217   4.700  1.00  5.54           O  
ATOM    265  N   HIS A  68       0.160   2.644   5.917  1.00  2.94           N  
ATOM    266  CA  HIS A  68       1.420   3.289   6.118  1.00  4.17           C  
ATOM    267  C   HIS A  68       2.427   2.759   5.156  1.00  5.32           C  
ATOM    268  O   HIS A  68       2.910   1.638   5.304  1.00  7.70           O  
ATOM    269  N   LEU A  69       2.844   3.536   4.140  1.00  5.29           N  
ATOM    270  CA  LEU A  69       3.923   3.224   3.255  1.00  3.97           C  
ATOM    271  C   LEU A  69       5.209   3.648   3.876  1.00  5.07           C  
ATOM    272  O   LEU A  69       5.600   4.813   3.921  1.00  4.34           O  
ATOM    273  N   VAL A  70       5.919   2.690   4.499  1.00  4.29           N  
ATOM    274  CA  VAL A  70       7.262   2.822   4.972  1.00  6.26           C  
ATOM    275  C   VAL A  70       8.152   2.156   3.980  1.00  9.22           C  
ATOM    276  O   VAL A  70       7.744   1.294   3.203  1.00  9.36           O  
TER
ENDMDL
MODEL      16
ATOM      1  N   GLN A   2     -11.116   5.105  -2.951  1.00  9.27           N  
ATOM      2  CA  GLN A   2      -9.869   5.706  -2.592  1.00  9.07           C  
ATOM      3  C   GLN A   2      -9.372   5.236  -1.268  1.00  8.72           C  
ATOM      4  O   GLN A   2     -10.140   5.232  -0.307  1.00  8.22           O  
ATOM      5  N   ILE A   3      -8.109   4.779  -1.196  1.00  5.87           N  
ATOM      6  CA  ILE A   3      -7.415   4.451   0.010  1.00  5.07           C  
ATOM      7  C   ILE A   3      -6.201   5.290   0.220  1.00  4.01           C  
ATOM      8  O   ILE A   3      -5.655   5.912  -0.690  1.00  4.61           O  
ATOM      9  N   PHE A   4      -5.587   5.232   1.415  1.00  4.55           N  
ATOM     10  CA  PHE A   4      -4.507   6.096   1.780  1.00  4.68           C  
ATOM     11  C   PHE A   4      -3.375   5.345   2.390  1.00  5.30           C  
ATOM     12  O   PHE A   4      -3.509   4.545   3.315  1.00  5.58           O  
ATOM     13  N   VAL A   5      -2.151   5.618   1.904  1.00  4.44           N  
ATOM     14  CA  VAL A   5      -0.942   5.065   2.432  1.00  3.87           C  
ATOM     15  C   VAL A   5      -0.322   6.202   3.167  1.00  4.93           C  
ATOM     16  O   VAL A   5      -0.038   7.243   2.577  1.00  6.84           O  
ATOM     17  N   LYS A   6      -0.214   6.087   4.503  1.00  6.04           N  
ATOM     18  CA  LYS A   6       0.599   6.979   5.271  1.00  6.12           C  
ATOM     19  C   LYS A   6       2.027   6.565   5.169  1.00  6.57           C  
ATOM     20  O   LYS A   6       2.451   5.411   5.216  1.00  5.76           O  
ATOM     21  N   THR A   7       2.912   7.576   5.108  1.00  7.41           N  
ATOM     22  CA  THR A   7       4.329   7.383   5.070  1.00  7.48           C  
ATOM     23  C   THR A   7       4.941   7.440   6.428  1.00  8.75           C  
ATOM     24  O   THR A   7       4.209   7.556   7.409  1.00  8.58           O  
ATOM     25  N   LEU A   8       6.273   7.343   6.580  1.00  9.84           N  
ATOM     26  CA  LEU A   8       6.945   7.334   7.842  1.00 14.15           C  
ATOM     27  C   LEU A   8       7.255   8.700   8.351  1.00 17.37           C  
ATOM     28  O   LEU A   8       7.353   8.886   9.563  1.00 17.01           O  
ATOM     29  N   THR A   9       7.395   9.698   7.460  1.00 18.33           N  
ATOM     30  CA  THR A   9       7.322  11.099   7.736  1.00 19.24           C  
ATOM     31  C   THR A   9       5.917  11.463   8.073  1.00 19.48           C  
ATOM     32  O   THR A   9       5.562  12.024   9.109  1.00 23.14           O  
ATOM     33  N   GLY A  10       5.011  11.121   7.140  1.00 19.43           N  
ATOM     34  CA  GLY A  10       3.607  11.087   7.410  1.00 18.74           C  
ATOM     35  C   GLY A  10       2.814  11.936   6.477  1.00 17.62           C  
ATOM     36  O   GLY A  10       2.198  12.910   6.906  1.00 19.74           O  
ATOM     37  N   LYS A  11       2.934  11.648   5.169  1.00 13.56           N  
ATOM     38  CA  LYS A  11       2.140  12.235   4.135  1.00 11.91           C  
ATOM     39  C   LYS A  11       1.045  11.353   3.641  1.00 10.18           C  
ATOM     40  O   LYS A  11       1.200  10.143   3.483  1.00  9.10           O  
ATOM     41  N   THR A  12      -0.091  11.911   3.186  1.00  9.63           N  
ATOM     42  CA  THR A  12      -1.020  11.145   2.415  1.00  9.85           C  
ATOM     43  C   THR A  12      -0.675  10.841   0.998  1.00 11.66           C  
ATOM     44  O   THR A  12      -0.465  11.737   0.182  1.00 12.33           O  
ATOM     45  N   ILE A  13      -0.461   9.546   0.705  1.00 10.42           N  
ATOM     46  CA  ILE A  13      -0.521   9.048  -0.634  1.00 11.84           C  
ATOM     47  C   ILE A  13      -1.873   8.470  -0.878  1.00 10.55           C  
ATOM     48  O   ILE A  13      -2.361   7.615  -0.141  1.00 11.92           O  
ATOM     49  N   THR A  14      -2.557   8.979  -1.918  1.00  9.39           N  
ATOM     50  CA  THR A  14      -3.950   8.694  -2.077  1.00  9.63           C  
ATOM     51  C   THR A  14      -3.964   7.813  -3.278  1.00 11.20           C  
ATOM     52  O   THR A  14      -3.427   8.185  -4.320  1.00 11.63           O  
ATOM     53  N   LEU A  15      -4.468   6.567  -3.219  1.00  8.29           N  
ATOM     54  CA  LEU A  15      -4.605   5.653  -4.310  1.00  9.03           C  
ATOM     55  C   LEU A  15      -6.025   5.333  -4.629  1.00  8.59           C  
ATOM     56  O   LEU A  15      -6.833   5.295  -3.703  1.00  7.79           O  
ATOM     57  N   GLU A  16      -6.295   5.112  -5.928  1.00 11.04           N  
ATOM     58  CA  GLU A  16      -7.566   4.929  -6.559  1.00 11.50           C  
ATOM     59  C   GLU A  16      -7.551   3.514  -7.025  1.00 10.13           C  
ATOM     60  O   GLU A  16      -6.827   3.119  -7.937  1.00  9.83           O  
ATOM     61  N   VAL A  17      -8.286   2.695  -6.252  1.00  8.99           N  
ATOM     62  CA  VAL A  17      -8.174   1.275  -6.375  1.00  8.85           C  
ATOM     63  C   VAL A  17      -9.537   0.707  -6.574  1.00  8.04           C  
ATOM     64  O   VAL A  17     -10.467   1.412  -6.185  1.00  8.99           O  
ATOM     65  N   GLU A  18      -9.714  -0.578  -6.929  1.00  7.29           N  
ATOM     66  CA  GLU A  18     -10.896  -1.376  -6.823  1.00  7.08           C  
ATOM     67  C   GLU A  18     -10.537  -2.432  -5.835  1.00  6.45           C  
ATOM     68  O   GLU A  18      -9.362  -2.777  -5.718  1.00  5.28           O  
ATOM     69  N   PRO A  19     -11.483  -3.061  -5.204  1.00  7.24           N  
ATOM     70  CA  PRO A  19     -11.063  -3.845  -4.079  1.00  7.07           C  
ATOM     71  C   PRO A  19     -10.775  -5.228  -4.552  1.00  6.65           C  
ATOM     72  O   PRO A  19     -10.320  -6.101  -3.815  1.00  6.37           O  
ATOM     73  N   SER A  20     -11.044  -5.503  -5.841  1.00  6.80           N  
ATOM     74  CA  SER A  20     -10.556  -6.634  -6.568  1.00  6.28           C  
ATOM     75  C   SER A  20      -9.116  -6.639  -6.951  1.00  8.45           C  
ATOM     76  O   SER A  20      -8.636  -7.711  -7.317  1.00  7.26           O  
ATOM     77  N   ASP A  21      -8.354  -5.537  -6.831  1.00  7.50           N  
ATOM     78  CA  ASP A  21      -6.987  -5.437  -7.238  1.00  7.70           C  
ATOM     79  C   ASP A  21      -6.051  -5.943  -6.195  1.00  7.08           C  
ATOM     80  O   ASP A  21      -6.363  -6.090  -5.014  1.00  8.11           O  
ATOM     81  N   THR A  22      -4.816  -6.294  -6.597  1.00  5.37           N  
ATOM     82  CA  THR A  22      -3.853  -6.991  -5.803  1.00  6.01           C  
ATOM     83  C   THR A  22      -2.950  -5.980  -5.183  1.00  8.01           C  
ATOM     84  O   THR A  22      -2.857  -4.810  -5.549  1.00  8.11           O  
ATOM     85  N   ILE A  23      -2.300  -6.284  -4.045  1.00  8.32           N  
ATOM     86  CA  ILE A  23      -1.476  -5.408  -3.271  1.00  9.92           C  
ATOM     87  C   ILE A  23      -0.251  -5.148  -4.078  1.00 10.01           C  
ATOM     88  O   ILE A  23       0.296  -4.047  -4.120  1.00  8.71           O  
ATOM     89  N   GLU A  24       0.247  -6.078  -4.913  1.00  9.54           N  
ATOM     90  CA  GLU A  24       1.227  -5.976  -5.950  1.00 11.81           C  
ATOM     91  C   GLU A  24       0.909  -4.886  -6.915  1.00 11.14           C  
ATOM     92  O   GLU A  24       1.771  -4.091  -7.286  1.00 10.62           O  
ATOM     93  N   ASN A  25      -0.367  -4.672  -7.283  1.00  9.43           N  
ATOM     94  CA  ASN A  25      -0.873  -3.566  -8.035  1.00 10.96           C  
ATOM     95  C   ASN A  25      -0.969  -2.320  -7.223  1.00  9.68           C  
ATOM     96  O   ASN A  25      -0.727  -1.232  -7.742  1.00  9.33           O  
ATOM     97  N   VAL A  26      -1.252  -2.323  -5.908  1.00  6.52           N  
ATOM     98  CA  VAL A  26      -1.280  -1.155  -5.084  1.00  5.53           C  
ATOM     99  C   VAL A  26       0.092  -0.640  -4.812  1.00  4.42           C  
ATOM    100  O   VAL A  26       0.269   0.565  -4.983  1.00  3.40           O  
ATOM    101  N   LYS A  27       1.046  -1.549  -4.545  1.00  2.64           N  
ATOM    102  CA  LYS A  27       2.434  -1.205  -4.553  1.00  4.14           C  
ATOM    103  C   LYS A  27       3.076  -0.836  -5.845  1.00  5.58           C  
ATOM    104  O   LYS A  27       3.992  -0.016  -5.790  1.00  4.11           O  
ATOM    105  N   ALA A  28       2.556  -1.255  -7.012  1.00  6.61           N  
ATOM    106  CA  ALA A  28       3.087  -0.812  -8.264  1.00  7.74           C  
ATOM    107  C   ALA A  28       2.768   0.603  -8.604  1.00  9.17           C  
ATOM    108  O   ALA A  28       3.532   1.279  -9.292  1.00 11.45           O  
ATOM    109  N   LYS A  29       1.594   1.097  -8.173  1.00  8.96           N  
ATOM    110  CA  LYS A  29       1.244   2.481  -8.088  1.00  7.90           C  
ATOM    111  C   LYS A  29       2.144   3.273  -7.203  1.00  6.92           C  
ATOM    112  O   LYS A  29       2.487   4.422  -7.476  1.00  6.87           O  
ATOM    113  N   ILE A  30       2.574   2.750  -6.041  1.00  4.57           N  
ATOM    114  CA  ILE A  30       3.654   3.274  -5.264  1.00  5.58           C  
ATOM    115  C   ILE A  30       4.956   3.454  -5.966  1.00  7.26           C  
ATOM    116  O   ILE A  30       5.654   4.457  -5.832  1.00  9.46           O  
ATOM    117  N   GLN A  31       5.351   2.458  -6.780  1.00  7.06           N  
ATOM    118  CA  GLN A  31       6.543   2.442  -7.569  1.00  8.67           C  
ATOM    119  C   GLN A  31       6.393   3.500  -8.608  1.00 10.90           C  
ATOM    120  O   GLN A  31       7.356   4.211  -8.893  1.00  9.63           O  
ATOM    121  N   ASP A  32       5.227   3.659  -9.258  1.00 10.93           N  
ATOM    122  CA  ASP A  32       5.033   4.668 -10.253  1.00 14.01           C  
ATOM    123  C   ASP A  32       5.199   6.052  -9.726  1.00 14.04           C  
ATOM    124  O   ASP A  32       6.074   6.800 -10.160  1.00 13.39           O  
ATOM    125  N   LYS A  33       4.375   6.416  -8.727  1.00 14.22           N  
ATOM    126  CA  LYS A  33       4.250   7.689  -8.087  1.00 14.00           C  
ATOM    127  C   LYS A  33       5.516   8.110  -7.423  1.00 12.37           C  
ATOM    128  O   LYS A  33       6.193   9.059  -7.812  1.00 12.17           O  
ATOM    129  N   GLU A  34       5.831   7.436  -6.302  1.00 10.11           N  
ATOM    130  CA  GLU A  34       6.930   7.837  -5.480  1.00 10.07           C  
ATOM    131  C   GLU A  34       8.257   7.443  -6.030  1.00  9.32           C  
ATOM    132  O   GLU A  34       9.193   8.240  -5.986  1.00 11.61           O  
ATOM    133  N   GLY A  35       8.423   6.206  -6.530  1.00  7.22           N  
ATOM    134  CA  GLY A  35       9.604   5.578  -7.036  1.00  6.29           C  
ATOM    135  C   GLY A  35      10.330   4.662  -6.113  1.00  6.93           C  
ATOM    136  O   GLY A  35      11.537   4.779  -5.905  1.00  7.41           O  
ATOM    137  N   ILE A  36       9.572   3.822  -5.386  1.00  5.86           N  
ATOM    138  CA  ILE A  36      10.114   2.874  -4.462  1.00  6.07           C  
ATOM    139  C   ILE A  36       9.923   1.478  -4.948  1.00  6.36           C  
ATOM    140  O   ILE A  36       8.800   1.098  -5.276  1.00  6.18           O  
ATOM    141  N   PRO A  37      10.935   0.705  -5.208  1.00  8.65           N  
ATOM    142  CA  PRO A  37      10.661  -0.591  -5.759  1.00  9.18           C  
ATOM    143  C   PRO A  37      10.187  -1.602  -4.772  1.00  9.85           C  
ATOM    144  O   PRO A  37      10.412  -1.563  -3.563  1.00  8.51           O  
ATOM    145  N   PRO A  38       9.552  -2.662  -5.175  1.00  8.71           N  
ATOM    146  CA  PRO A  38       8.676  -3.324  -4.253  1.00  9.08           C  
ATOM    147  C   PRO A  38       9.419  -4.310  -3.419  1.00  9.28           C  
ATOM    148  O   PRO A  38       8.765  -4.921  -2.575  1.00  6.50           O  
ATOM    149  N   ASP A  39      10.731  -4.579  -3.547  1.00 11.20           N  
ATOM    150  CA  ASP A  39      11.555  -5.271  -2.606  1.00 14.96           C  
ATOM    151  C   ASP A  39      12.158  -4.349  -1.603  1.00 13.99           C  
ATOM    152  O   ASP A  39      12.826  -4.794  -0.671  1.00 13.75           O  
ATOM    153  N   GLN A  40      11.922  -3.028  -1.681  1.00 11.60           N  
ATOM    154  CA  GLN A  40      12.261  -2.057  -0.687  1.00 10.76           C  
ATOM    155  C   GLN A  40      11.194  -1.598   0.246  1.00  8.01           C  
ATOM    156  O   GLN A  40      11.436  -1.247   1.400  1.00  8.96           O  
ATOM    157  N   GLN A  41       9.951  -1.592  -0.267  1.00  6.52           N  
ATOM    158  CA  GLN A  41       8.766  -1.134   0.389  1.00  3.87           C  
ATOM    159  C   GLN A  41       7.860  -2.260   0.749  1.00  4.79           C  
ATOM    160  O   GLN A  41       7.859  -3.284   0.068  1.00  6.34           O  
ATOM    161  N   ARG A  42       7.065  -2.048   1.813  1.00  5.73           N  
ATOM    162  CA  ARG A  42       6.157  -3.004   2.366  1.00  6.97           C  
ATOM    163  C   ARG A  42       5.009  -2.235   2.926  1.00  7.15           C  
ATOM    164  O   ARG A  42       5.162  -1.079   3.318  1.00  7.33           O  
ATOM    165  N   LEU A  43       3.832  -2.880   3.008  1.00  4.65           N  
ATOM    166  CA  LEU A  43       2.691  -2.224   3.567  1.00  3.51           C  
ATOM    167  C   LEU A  43       2.285  -3.031   4.752  1.00  5.56           C  
ATOM    168  O   LEU A  43       2.467  -4.247   4.788  1.00  4.19           O  
ATOM    169  N   ILE A  44       1.725  -2.313   5.741  1.00  4.58           N  
ATOM    170  CA  ILE A  44       1.118  -2.913   6.888  1.00  5.55           C  
ATOM    171  C   ILE A  44      -0.258  -2.354   7.012  1.00  5.46           C  
ATOM    172  O   ILE A  44      -0.449  -1.147   6.876  1.00  6.04           O  
ATOM    173  N   PHE A  45      -1.254  -3.211   7.301  1.00  6.75           N  
ATOM    174  CA  PHE A  45      -2.574  -2.791   7.654  1.00  4.70           C  
ATOM    175  C   PHE A  45      -2.817  -3.195   9.068  1.00  6.34           C  
ATOM    176  O   PHE A  45      -2.991  -4.358   9.426  1.00  5.45           O  
ATOM    177  N   ALA A  46      -2.818  -2.129   9.887  1.00  6.53           N  
ATOM    178  CA  ALA A  46      -2.893  -2.062  11.314  1.00  7.15           C  
ATOM    179  C   ALA A  46      -1.727  -2.740  11.946  1.00  9.00           C  
ATOM    180  O   ALA A  46      -0.911  -2.082  12.591  1.00 11.15           O  
ATOM    181  N   GLY A  47      -1.560  -4.072  11.872  1.00  9.35           N  
ATOM    182  CA  GLY A  47      -0.550  -4.777  12.598  1.00 11.68           C  
ATOM    183  C   GLY A  47      -0.171  -5.940  11.748  1.00 11.14           C  
ATOM    184  O   GLY A  47       0.894  -6.496  12.013  1.00 13.93           O  
ATOM    185  N   LYS A  48      -0.967  -6.333  10.737  1.00 10.47           N  
ATOM    186  CA  LYS A  48      -0.616  -7.357   9.803  1.00  8.82           C  
ATOM    187  C   LYS A  48       0.142  -6.896   8.606  1.00  7.68           C  
ATOM    188  O   LYS A  48      -0.206  -6.020   7.816  1.00  6.47           O  
ATOM    189  N   GLN A  49       1.252  -7.585   8.285  1.00  8.89           N  
ATOM    190  CA  GLN A  49       2.244  -7.293   7.297  1.00  7.18           C  
ATOM    191  C   GLN A  49       1.820  -7.906   6.006  1.00  8.23           C  
ATOM    192  O   GLN A  49       1.609  -9.115   5.933  1.00  9.70           O  
ATOM    193  N   LEU A  50       1.651  -7.086   4.953  1.00  6.51           N  
ATOM    194  CA  LEU A  50       0.997  -7.548   3.768  1.00  7.41           C  
ATOM    195  C   LEU A  50       1.825  -8.306   2.789  1.00  8.27           C  
ATOM    196  O   LEU A  50       3.014  -8.088   2.557  1.00  8.34           O  
ATOM    197  N   GLU A  51       1.172  -9.293   2.150  1.00  9.43           N  
ATOM    198  CA  GLU A  51       1.777 -10.098   1.135  1.00 11.90           C  
ATOM    199  C   GLU A  51       1.122  -9.719  -0.148  1.00 11.49           C  
ATOM    200  O   GLU A  51      -0.066  -9.439  -0.303  1.00  9.88           O  
ATOM    201  N   ASP A  52       1.986  -9.634  -1.175  1.00 12.71           N  
ATOM    202  CA  ASP A  52       1.785  -8.917  -2.396  1.00 16.56           C  
ATOM    203  C   ASP A  52       0.808  -9.590  -3.297  1.00 15.83           C  
ATOM    204  O   ASP A  52      -0.009  -8.863  -3.859  1.00 17.21           O  
ATOM    205  N   GLY A  53       0.808 -10.925  -3.461  1.00 15.00           N  
ATOM    206  CA  GLY A  53      -0.110 -11.587  -4.334  1.00 11.77           C  
ATOM    207  C   GLY A  53      -1.405 -11.991  -3.719  1.00 11.10           C  
ATOM    208  O   GLY A  53      -2.064 -12.859  -4.290  1.00 11.25           O  
ATOM    209  N   ARG A  54      -1.805 -11.152  -2.746  1.00  8.53           N  
ATOM    210  CA  ARG A  54      -3.199 -11.072  -2.434  1.00  9.05           C  
ATOM    211  C   ARG A  54      -3.905  -9.840  -2.883  1.00  8.96           C  
ATOM    212  O   ARG A  54      -3.352  -9.048  -3.645  1.00 11.60           O  
ATOM    213  N   THR A  55      -5.192  -9.671  -2.533  1.00  9.05           N  
ATOM    214  CA  THR A  55      -6.021  -8.570  -2.917  1.00  9.03           C  
ATOM    215  C   THR A  55      -6.386  -7.731  -1.741  1.00  8.15           C  
ATOM    216  O   THR A  55      -6.053  -8.071  -0.607  1.00  5.91           O  
ATOM    217  N   LEU A  56      -7.123  -6.639  -2.015  1.00  6.91           N  
ATOM    218  CA  LEU A  56      -7.709  -5.849  -0.978  1.00  8.29           C  
ATOM    219  C   LEU A  56      -8.956  -6.429  -0.403  1.00  8.05           C  
ATOM    220  O   LEU A  56      -9.336  -6.111   0.723  1.00 10.17           O  
ATOM    221  N   SER A  57      -9.705  -7.310  -1.090  1.00  8.92           N  
ATOM    222  CA  SER A  57     -10.900  -7.959  -0.647  1.00  9.00           C  
ATOM    223  C   SER A  57     -10.606  -9.042   0.333  1.00  9.44           C  
ATOM    224  O   SER A  57     -11.411  -9.403   1.189  1.00 10.91           O  
ATOM    225  N   ASP A  58      -9.395  -9.625   0.287  1.00  9.11           N  
ATOM    226  CA  ASP A  58      -8.926 -10.690   1.119  1.00  7.91           C  
ATOM    227  C   ASP A  58      -8.738 -10.319   2.549  1.00  9.12           C  
ATOM    228  O   ASP A  58      -9.387 -10.916   3.406  1.00  8.61           O  
ATOM    229  N   TYR A  59      -7.965  -9.253   2.826  1.00  7.97           N  
ATOM    230  CA  TYR A  59      -7.654  -8.919   4.181  1.00  8.45           C  
ATOM    231  C   TYR A  59      -8.775  -8.158   4.801  1.00 10.98           C  
ATOM    232  O   TYR A  59      -8.798  -8.031   6.024  1.00 12.95           O  
ATOM    233  N   ASN A  60      -9.694  -7.598   3.995  1.00 12.38           N  
ATOM    234  CA  ASN A  60     -10.771  -6.734   4.367  1.00 13.94           C  
ATOM    235  C   ASN A  60     -10.184  -5.371   4.500  1.00 14.16           C  
ATOM    236  O   ASN A  60     -10.182  -4.697   5.529  1.00 14.26           O  
ATOM    237  N   ILE A  61      -9.520  -4.856   3.450  1.00 11.08           N  
ATOM    238  CA  ILE A  61      -9.058  -3.504   3.377  1.00 11.78           C  
ATOM    239  C   ILE A  61     -10.117  -2.665   2.749  1.00 13.74           C  
ATOM    240  O   ILE A  61     -10.271  -2.716   1.530  1.00 14.60           O  
ATOM    241  N   GLN A  62     -10.869  -1.918   3.576  1.00 13.97           N  
ATOM    242  CA  GLN A  62     -12.034  -1.208   3.147  1.00 15.52           C  
ATOM    243  C   GLN A  62     -11.713   0.181   2.713  1.00 13.94           C  
ATOM    244  O   GLN A  62     -10.562   0.609   2.778  1.00 12.15           O  
ATOM    245  N   LYS A  63     -12.694   0.948   2.205  1.00 11.73           N  
ATOM    246  CA  LYS A  63     -12.546   2.276   1.696  1.00 11.97           C  
ATOM    247  C   LYS A  63     -12.274   3.421   2.610  1.00 10.41           C  
ATOM    248  O   LYS A  63     -12.807   3.429   3.718  1.00  9.59           O  
ATOM    249  N   GLU A  64     -11.534   4.457   2.177  1.00 10.04           N  
ATOM    250  CA  GLU A  64     -11.041   5.552   2.954  1.00 10.94           C  
ATOM    251  C   GLU A  64     -10.293   5.221   4.199  1.00  9.74           C  
ATOM    252  O   GLU A  64     -10.285   5.881   5.237  1.00  9.42           O  
ATOM    253  N   SER A  65      -9.587   4.078   4.120  1.00  6.85           N  
ATOM    254  CA  SER A  65      -8.859   3.456   5.182  1.00  6.90           C  
ATOM    255  C   SER A  65      -7.408   3.735   4.990  1.00  4.72           C  
ATOM    256  O   SER A  65      -6.950   4.080   3.902  1.00  3.91           O  
ATOM    257  N   THR A  66      -6.676   3.442   6.080  1.00  4.48           N  
ATOM    258  CA  THR A  66      -5.304   3.844   6.082  1.00  3.80           C  
ATOM    259  C   THR A  66      -4.414   2.650   6.129  1.00  4.60           C  
ATOM    260  O   THR A  66      -4.619   1.744   6.935  1.00  5.33           O  
ATOM    261  N   LEU A  67      -3.376   2.576   5.277  1.00  4.17           N  
ATOM    262  CA  LEU A  67      -2.317   1.622   5.165  1.00  3.85           C  
ATOM    263  C   LEU A  67      -1.064   2.296   5.609  1.00  3.80           C  
ATOM    264  O   LEU A  67      -0.896   3.513   5.559  1.00  5.54           O  
ATOM    265  N   HIS A  68      -0.151   1.479   6.165  1.00  2.94           N  
ATOM    266  CA  HIS A  68       1.078   2.007   6.670  1.00  4.17           C  
ATOM    267  C   HIS A  68       2.217   1.685   5.764  1.00  5.32           C  
ATOM    268  O   HIS A  68       2.612   0.531   5.607  1.00  7.70           O  
ATOM    269  N   LEU A  69       2.868   2.672   5.124  1.00  5.29           N  
ATOM    270  CA  LEU A  69       4.083   2.342   4.447  1.00  3.97           C  
ATOM    271  C   LEU A  69       5.176   2.230   5.453  1.00  5.07           C  
ATOM    272  O   LEU A  69       5.410   3.124   6.265  1.00  4.34           O  
ATOM    273  N   VAL A  70       5.893   1.100   5.317  1.00  4.29           N  
ATOM    274  CA  VAL A  70       7.227   1.086   5.832  1.00  6.26           C  
ATOM    275  C   VAL A  70       8.201   0.643   4.796  1.00  9.22           C  
ATOM    276  O   VAL A  70       7.847   0.188   3.709  1.00  9.36           O  
TER
ENDMDL
MODEL      17
ATOM      1  N   GLN A   2     -10.762   6.094  -3.257  1.00  9.27           N  
ATOM      2  CA  GLN A   2      -9.456   6.651  -3.087  1.00  9.07           C  
ATOM      3  C   GLN A   2      -8.850   6.329  -1.765  1.00  8.72           C  
ATOM      4  O   GLN A   2      -9.497   6.224  -0.724  1.00  8.22           O  
ATOM      5  N   ILE A   3      -7.560   5.950  -1.768  1.00  5.87           N  
ATOM      6  CA  ILE A   3      -6.758   5.698  -0.611  1.00  5.07           C  
ATOM      7  C   ILE A   3      -5.625   6.660  -0.718  1.00  4.01           C  
ATOM      8  O   ILE A   3      -5.232   7.131  -1.784  1.00  4.61           O  
ATOM      9  N   PHE A   4      -5.044   6.972   0.454  1.00  4.55           N  
ATOM     10  CA  PHE A   4      -3.817   7.689   0.613  1.00  4.68           C  
ATOM     11  C   PHE A   4      -2.668   6.858   1.069  1.00  5.30           C  
ATOM     12  O   PHE A   4      -2.707   6.295   2.162  1.00  5.58           O  
ATOM     13  N   VAL A   5      -1.607   6.914   0.244  1.00  4.44           N  
ATOM     14  CA  VAL A   5      -0.410   6.208   0.580  1.00  3.87           C  
ATOM     15  C   VAL A   5       0.687   7.141   0.961  1.00  4.93           C  
ATOM     16  O   VAL A   5       1.223   7.896   0.151  1.00  6.84           O  
ATOM     17  N   LYS A   6       1.141   7.101   2.226  1.00  6.04           N  
ATOM     18  CA  LYS A   6       2.208   7.940   2.677  1.00  6.12           C  
ATOM     19  C   LYS A   6       3.496   7.194   2.740  1.00  6.57           C  
ATOM     20  O   LYS A   6       3.598   6.181   3.431  1.00  5.76           O  
ATOM     21  N   THR A   7       4.522   7.681   2.020  1.00  7.41           N  
ATOM     22  CA  THR A   7       5.816   7.097   1.847  1.00  7.48           C  
ATOM     23  C   THR A   7       6.737   7.311   2.999  1.00  8.75           C  
ATOM     24  O   THR A   7       6.394   8.162   3.818  1.00  8.58           O  
ATOM     25  N   LEU A   8       7.908   6.659   3.113  1.00  9.84           N  
ATOM     26  CA  LEU A   8       8.756   6.898   4.240  1.00 14.15           C  
ATOM     27  C   LEU A   8       9.594   8.129   4.261  1.00 17.37           C  
ATOM     28  O   LEU A   8      10.113   8.587   5.278  1.00 17.01           O  
ATOM     29  N   THR A   9       9.721   8.716   3.057  1.00 18.33           N  
ATOM     30  CA  THR A   9      10.237  10.031   2.835  1.00 19.24           C  
ATOM     31  C   THR A   9       9.249  11.093   3.174  1.00 19.48           C  
ATOM     32  O   THR A   9       9.538  12.037   3.907  1.00 23.14           O  
ATOM     33  N   GLY A  10       8.014  10.990   2.650  1.00 19.43           N  
ATOM     34  CA  GLY A  10       6.849  11.674   3.120  1.00 18.74           C  
ATOM     35  C   GLY A  10       5.955  12.338   2.130  1.00 17.62           C  
ATOM     36  O   GLY A  10       5.443  13.448   2.268  1.00 19.74           O  
ATOM     37  N   LYS A  11       5.797  11.607   1.012  1.00 13.56           N  
ATOM     38  CA  LYS A  11       5.025  11.936  -0.146  1.00 11.91           C  
ATOM     39  C   LYS A  11       3.692  11.270  -0.155  1.00 10.18           C  
ATOM     40  O   LYS A  11       3.621  10.051  -0.007  1.00  9.10           O  
ATOM     41  N   THR A  12       2.556  11.981  -0.277  1.00  9.63           N  
ATOM     42  CA  THR A  12       1.230  11.448  -0.315  1.00  9.85           C  
ATOM     43  C   THR A  12       0.891  10.987  -1.690  1.00 11.66           C  
ATOM     44  O   THR A  12       0.538  11.806  -2.538  1.00 12.33           O  
ATOM     45  N   ILE A  13       1.033   9.674  -1.946  1.00 10.42           N  
ATOM     46  CA  ILE A  13       0.577   9.019  -3.133  1.00 11.84           C  
ATOM     47  C   ILE A  13      -0.908   8.944  -3.032  1.00 10.55           C  
ATOM     48  O   ILE A  13      -1.443   8.439  -2.046  1.00 11.92           O  
ATOM     49  N   THR A  14      -1.678   9.477  -3.997  1.00  9.39           N  
ATOM     50  CA  THR A  14      -3.096   9.356  -4.138  1.00  9.63           C  
ATOM     51  C   THR A  14      -3.456   8.342  -5.169  1.00 11.20           C  
ATOM     52  O   THR A  14      -3.167   8.433  -6.361  1.00 11.63           O  
ATOM     53  N   LEU A  15      -4.022   7.214  -4.705  1.00  8.29           N  
ATOM     54  CA  LEU A  15      -4.363   6.112  -5.550  1.00  9.03           C  
ATOM     55  C   LEU A  15      -5.839   5.931  -5.452  1.00  8.59           C  
ATOM     56  O   LEU A  15      -6.476   6.214  -4.438  1.00  7.79           O  
ATOM     57  N   GLU A  16      -6.495   5.558  -6.565  1.00 11.04           N  
ATOM     58  CA  GLU A  16      -7.859   5.145  -6.683  1.00 11.50           C  
ATOM     59  C   GLU A  16      -7.845   3.686  -6.985  1.00 10.13           C  
ATOM     60  O   GLU A  16      -7.214   3.306  -7.970  1.00  9.83           O  
ATOM     61  N   VAL A  17      -8.485   2.860  -6.138  1.00  8.99           N  
ATOM     62  CA  VAL A  17      -8.523   1.442  -6.313  1.00  8.85           C  
ATOM     63  C   VAL A  17      -9.897   0.906  -6.099  1.00  8.04           C  
ATOM     64  O   VAL A  17     -10.819   1.612  -5.694  1.00  8.99           O  
ATOM     65  N   GLU A  18     -10.144  -0.388  -6.368  1.00  7.29           N  
ATOM     66  CA  GLU A  18     -11.384  -1.000  -6.005  1.00  7.08           C  
ATOM     67  C   GLU A  18     -11.245  -2.015  -4.923  1.00  6.45           C  
ATOM     68  O   GLU A  18     -10.134  -2.506  -4.726  1.00  5.28           O  
ATOM     69  N   PRO A  19     -12.202  -2.458  -4.164  1.00  7.24           N  
ATOM     70  CA  PRO A  19     -11.871  -3.129  -2.940  1.00  7.07           C  
ATOM     71  C   PRO A  19     -11.610  -4.593  -3.031  1.00  6.65           C  
ATOM     72  O   PRO A  19     -11.280  -5.289  -2.072  1.00  6.37           O  
ATOM     73  N   SER A  20     -11.653  -5.085  -4.282  1.00  6.80           N  
ATOM     74  CA  SER A  20     -11.212  -6.372  -4.722  1.00  6.28           C  
ATOM     75  C   SER A  20      -9.801  -6.285  -5.194  1.00  8.45           C  
ATOM     76  O   SER A  20      -9.290  -7.292  -5.682  1.00  7.26           O  
ATOM     77  N   ASP A  21      -9.059  -5.167  -5.105  1.00  7.50           N  
ATOM     78  CA  ASP A  21      -7.632  -5.178  -5.200  1.00  7.70           C  
ATOM     79  C   ASP A  21      -6.877  -5.775  -4.063  1.00  7.08           C  
ATOM     80  O   ASP A  21      -7.096  -5.479  -2.889  1.00  8.11           O  
ATOM     81  N   THR A  22      -5.905  -6.673  -4.303  1.00  5.37           N  
ATOM     82  CA  THR A  22      -5.019  -7.240  -3.334  1.00  6.01           C  
ATOM     83  C   THR A  22      -3.951  -6.317  -2.857  1.00  8.01           C  
ATOM     84  O   THR A  22      -3.723  -5.290  -3.495  1.00  8.11           O  
ATOM     85  N   ILE A  23      -3.363  -6.588  -1.678  1.00  8.32           N  
ATOM     86  CA  ILE A  23      -2.306  -5.772  -1.165  1.00  9.92           C  
ATOM     87  C   ILE A  23      -1.157  -5.681  -2.109  1.00 10.01           C  
ATOM     88  O   ILE A  23      -0.594  -4.601  -2.277  1.00  8.71           O  
ATOM     89  N   GLU A  24      -0.996  -6.749  -2.910  1.00  9.54           N  
ATOM     90  CA  GLU A  24      -0.037  -6.866  -3.965  1.00 11.81           C  
ATOM     91  C   GLU A  24      -0.172  -5.755  -4.949  1.00 11.14           C  
ATOM     92  O   GLU A  24       0.755  -5.123  -5.453  1.00 10.62           O  
ATOM     93  N   ASN A  25      -1.426  -5.479  -5.352  1.00  9.43           N  
ATOM     94  CA  ASN A  25      -1.778  -4.535  -6.366  1.00 10.96           C  
ATOM     95  C   ASN A  25      -1.412  -3.139  -5.994  1.00  9.68           C  
ATOM     96  O   ASN A  25      -0.835  -2.334  -6.722  1.00  9.33           O  
ATOM     97  N   VAL A  26      -1.738  -2.795  -4.735  1.00  6.52           N  
ATOM     98  CA  VAL A  26      -1.366  -1.551  -4.135  1.00  5.53           C  
ATOM     99  C   VAL A  26       0.101  -1.294  -4.109  1.00  4.42           C  
ATOM    100  O   VAL A  26       0.549  -0.224  -4.518  1.00  3.40           O  
ATOM    101  N   LYS A  27       0.922  -2.291  -3.733  1.00  2.64           N  
ATOM    102  CA  LYS A  27       2.338  -2.328  -3.933  1.00  4.14           C  
ATOM    103  C   LYS A  27       2.879  -2.270  -5.320  1.00  5.58           C  
ATOM    104  O   LYS A  27       3.903  -1.668  -5.638  1.00  4.11           O  
ATOM    105  N   ALA A  28       2.178  -2.817  -6.329  1.00  6.61           N  
ATOM    106  CA  ALA A  28       2.480  -2.797  -7.727  1.00  7.74           C  
ATOM    107  C   ALA A  28       2.414  -1.449  -8.358  1.00  9.17           C  
ATOM    108  O   ALA A  28       3.297  -1.116  -9.147  1.00 11.45           O  
ATOM    109  N   LYS A  29       1.353  -0.692  -8.027  1.00  8.96           N  
ATOM    110  CA  LYS A  29       1.280   0.691  -8.381  1.00  7.90           C  
ATOM    111  C   LYS A  29       2.234   1.666  -7.780  1.00  6.92           C  
ATOM    112  O   LYS A  29       2.577   2.721  -8.310  1.00  6.87           O  
ATOM    113  N   ILE A  30       2.800   1.273  -6.625  1.00  4.57           N  
ATOM    114  CA  ILE A  30       3.894   1.945  -5.997  1.00  5.58           C  
ATOM    115  C   ILE A  30       5.186   1.695  -6.696  1.00  7.26           C  
ATOM    116  O   ILE A  30       5.979   2.620  -6.864  1.00  9.46           O  
ATOM    117  N   GLN A  31       5.485   0.463  -7.146  1.00  7.06           N  
ATOM    118  CA  GLN A  31       6.545   0.116  -8.042  1.00  8.67           C  
ATOM    119  C   GLN A  31       6.561   0.899  -9.309  1.00 10.90           C  
ATOM    120  O   GLN A  31       7.491   1.670  -9.542  1.00  9.63           O  
ATOM    121  N   ASP A  32       5.514   0.878 -10.152  1.00 10.93           N  
ATOM    122  CA  ASP A  32       5.283   1.854 -11.172  1.00 14.01           C  
ATOM    123  C   ASP A  32       5.492   3.296 -10.862  1.00 14.04           C  
ATOM    124  O   ASP A  32       6.013   4.042 -11.691  1.00 13.39           O  
ATOM    125  N   LYS A  33       5.019   3.802  -9.710  1.00 14.22           N  
ATOM    126  CA  LYS A  33       5.047   5.196  -9.394  1.00 14.00           C  
ATOM    127  C   LYS A  33       6.421   5.609  -8.990  1.00 12.37           C  
ATOM    128  O   LYS A  33       6.933   6.629  -9.449  1.00 12.17           O  
ATOM    129  N   GLU A  34       7.074   4.877  -8.069  1.00 10.11           N  
ATOM    130  CA  GLU A  34       8.191   5.368  -7.325  1.00 10.07           C  
ATOM    131  C   GLU A  34       9.496   4.700  -7.593  1.00  9.32           C  
ATOM    132  O   GLU A  34      10.520   5.248  -7.190  1.00 11.61           O  
ATOM    133  N   GLY A  35       9.488   3.500  -8.200  1.00  7.22           N  
ATOM    134  CA  GLY A  35      10.656   2.732  -8.502  1.00  6.29           C  
ATOM    135  C   GLY A  35      11.105   1.815  -7.417  1.00  6.93           C  
ATOM    136  O   GLY A  35      12.288   1.497  -7.301  1.00  7.41           O  
ATOM    137  N   ILE A  36      10.213   1.292  -6.557  1.00  5.86           N  
ATOM    138  CA  ILE A  36      10.445   0.611  -5.321  1.00  6.07           C  
ATOM    139  C   ILE A  36      10.087  -0.827  -5.468  1.00  6.36           C  
ATOM    140  O   ILE A  36       8.910  -1.032  -5.762  1.00  6.18           O  
ATOM    141  N   PRO A  37      10.928  -1.814  -5.373  1.00  8.65           N  
ATOM    142  CA  PRO A  37      10.485  -3.170  -5.527  1.00  9.18           C  
ATOM    143  C   PRO A  37       9.500  -3.782  -4.592  1.00  9.85           C  
ATOM    144  O   PRO A  37       9.590  -3.482  -3.402  1.00  8.51           O  
ATOM    145  N   PRO A  38       8.536  -4.601  -4.889  1.00  8.71           N  
ATOM    146  CA  PRO A  38       7.421  -4.868  -4.028  1.00  9.08           C  
ATOM    147  C   PRO A  38       7.676  -5.738  -2.845  1.00  9.28           C  
ATOM    148  O   PRO A  38       6.834  -5.972  -1.981  1.00  6.50           O  
ATOM    149  N   ASP A  39       8.898  -6.290  -2.732  1.00 11.20           N  
ATOM    150  CA  ASP A  39       9.278  -7.098  -1.615  1.00 14.96           C  
ATOM    151  C   ASP A  39      10.018  -6.269  -0.622  1.00 13.99           C  
ATOM    152  O   ASP A  39      10.018  -6.676   0.539  1.00 13.75           O  
ATOM    153  N   GLN A  40      10.571  -5.134  -1.084  1.00 11.60           N  
ATOM    154  CA  GLN A  40      11.079  -4.189  -0.138  1.00 10.76           C  
ATOM    155  C   GLN A  40       9.968  -3.543   0.616  1.00  8.01           C  
ATOM    156  O   GLN A  40      10.113  -3.160   1.775  1.00  8.96           O  
ATOM    157  N   GLN A  41       8.885  -3.198  -0.103  1.00  6.52           N  
ATOM    158  CA  GLN A  41       7.685  -2.665   0.462  1.00  3.87           C  
ATOM    159  C   GLN A  41       6.998  -3.558   1.437  1.00  4.79           C  
ATOM    160  O   GLN A  41       6.815  -4.733   1.122  1.00  6.34           O  
ATOM    161  N   ARG A  42       6.444  -2.967   2.510  1.00  5.73           N  
ATOM    162  CA  ARG A  42       5.299  -3.382   3.259  1.00  6.97           C  
ATOM    163  C   ARG A  42       4.498  -2.131   3.386  1.00  7.15           C  
ATOM    164  O   ARG A  42       4.960  -0.992   3.371  1.00  7.33           O  
ATOM    165  N   LEU A  43       3.183  -2.396   3.493  1.00  4.65           N  
ATOM    166  CA  LEU A  43       2.136  -1.510   3.899  1.00  3.51           C  
ATOM    167  C   LEU A  43       1.579  -1.898   5.226  1.00  5.56           C  
ATOM    168  O   LEU A  43       1.340  -3.075   5.492  1.00  4.19           O  
ATOM    169  N   ILE A  44       1.249  -0.888   6.051  1.00  4.58           N  
ATOM    170  CA  ILE A  44       0.538  -0.995   7.287  1.00  5.55           C  
ATOM    171  C   ILE A  44      -0.824  -0.412   7.121  1.00  5.46           C  
ATOM    172  O   ILE A  44      -0.919   0.610   6.443  1.00  6.04           O  
ATOM    173  N   PHE A  45      -1.925  -0.920   7.703  1.00  6.75           N  
ATOM    174  CA  PHE A  45      -3.061  -0.077   7.910  1.00  4.70           C  
ATOM    175  C   PHE A  45      -3.583  -0.185   9.302  1.00  6.34           C  
ATOM    176  O   PHE A  45      -3.838  -1.270   9.821  1.00  5.45           O  
ATOM    177  N   ALA A  46      -3.799   0.946   9.998  1.00  6.53           N  
ATOM    178  CA  ALA A  46      -4.391   1.047  11.296  1.00  7.15           C  
ATOM    179  C   ALA A  46      -3.526   0.342  12.283  1.00  9.00           C  
ATOM    180  O   ALA A  46      -4.040  -0.397  13.121  1.00 11.15           O  
ATOM    181  N   GLY A  47      -2.194   0.526  12.241  1.00  9.35           N  
ATOM    182  CA  GLY A  47      -1.155  -0.022  13.056  1.00 11.68           C  
ATOM    183  C   GLY A  47      -0.642  -1.342  12.593  1.00 11.14           C  
ATOM    184  O   GLY A  47       0.549  -1.612  12.737  1.00 13.93           O  
ATOM    185  N   LYS A  48      -1.532  -2.124  11.956  1.00 10.47           N  
ATOM    186  CA  LYS A  48      -1.369  -3.512  11.650  1.00  8.82           C  
ATOM    187  C   LYS A  48      -0.841  -3.735  10.275  1.00  7.68           C  
ATOM    188  O   LYS A  48      -1.216  -3.120   9.278  1.00  6.47           O  
ATOM    189  N   GLN A  49       0.179  -4.600  10.134  1.00  8.89           N  
ATOM    190  CA  GLN A  49       0.893  -4.824   8.916  1.00  7.18           C  
ATOM    191  C   GLN A  49       0.063  -5.663   8.007  1.00  8.23           C  
ATOM    192  O   GLN A  49      -0.481  -6.712   8.348  1.00  9.70           O  
ATOM    193  N   LEU A  50       0.041  -5.308   6.709  1.00  6.51           N  
ATOM    194  CA  LEU A  50      -0.733  -5.992   5.721  1.00  7.41           C  
ATOM    195  C   LEU A  50       0.048  -7.038   5.003  1.00  8.27           C  
ATOM    196  O   LEU A  50       1.139  -6.702   4.546  1.00  8.34           O  
ATOM    197  N   GLU A  51      -0.383  -8.288   4.759  1.00  9.43           N  
ATOM    198  CA  GLU A  51       0.206  -9.292   3.929  1.00 11.90           C  
ATOM    199  C   GLU A  51      -0.305  -9.206   2.532  1.00 11.49           C  
ATOM    200  O   GLU A  51      -1.257  -8.474   2.265  1.00  9.88           O  
ATOM    201  N   ASP A  52       0.302 -10.030   1.659  1.00 12.71           N  
ATOM    202  CA  ASP A  52       0.286  -9.831   0.243  1.00 16.56           C  
ATOM    203  C   ASP A  52      -1.008 -10.217  -0.387  1.00 15.83           C  
ATOM    204  O   ASP A  52      -1.569  -9.417  -1.134  1.00 17.21           O  
ATOM    205  N   GLY A  53      -1.328 -11.466  -0.004  1.00 15.00           N  
ATOM    206  CA  GLY A  53      -2.315 -12.150  -0.780  1.00 11.77           C  
ATOM    207  C   GLY A  53      -3.714 -11.641  -0.823  1.00 11.10           C  
ATOM    208  O   GLY A  53      -4.347 -11.867  -1.854  1.00 11.25           O  
ATOM    209  N   ARG A  54      -4.244 -10.959   0.208  1.00  8.53           N  
ATOM    210  CA  ARG A  54      -5.665 -10.809   0.270  1.00  9.05           C  
ATOM    211  C   ARG A  54      -6.080  -9.425  -0.092  1.00  8.96           C  
ATOM    212  O   ARG A  54      -5.228  -8.568  -0.323  1.00 11.60           O  
ATOM    213  N   THR A  55      -7.385  -9.162  -0.284  1.00  9.05           N  
ATOM    214  CA  THR A  55      -7.955  -7.932  -0.741  1.00  9.03           C  
ATOM    215  C   THR A  55      -8.170  -6.909   0.320  1.00  8.15           C  
ATOM    216  O   THR A  55      -8.206  -7.128   1.530  1.00  5.91           O  
ATOM    217  N   LEU A  56      -8.498  -5.694  -0.154  1.00  6.91           N  
ATOM    218  CA  LEU A  56      -8.811  -4.564   0.666  1.00  8.29           C  
ATOM    219  C   LEU A  56     -10.155  -4.718   1.291  1.00  8.05           C  
ATOM    220  O   LEU A  56     -10.336  -4.318   2.440  1.00 10.17           O  
ATOM    221  N   SER A  57     -11.130  -5.347   0.611  1.00  8.92           N  
ATOM    222  CA  SER A  57     -12.332  -5.857   1.194  1.00  9.00           C  
ATOM    223  C   SER A  57     -12.168  -6.854   2.289  1.00  9.44           C  
ATOM    224  O   SER A  57     -12.968  -6.860   3.223  1.00 10.91           O  
ATOM    225  N   ASP A  58     -11.217  -7.802   2.203  1.00  9.11           N  
ATOM    226  CA  ASP A  58     -10.992  -8.699   3.293  1.00  7.91           C  
ATOM    227  C   ASP A  58     -10.505  -8.069   4.553  1.00  9.12           C  
ATOM    228  O   ASP A  58     -11.073  -8.284   5.622  1.00  8.61           O  
ATOM    229  N   TYR A  59      -9.453  -7.243   4.413  1.00  7.97           N  
ATOM    230  CA  TYR A  59      -8.847  -6.483   5.462  1.00  8.45           C  
ATOM    231  C   TYR A  59      -9.838  -5.583   6.117  1.00 10.98           C  
ATOM    232  O   TYR A  59      -9.901  -5.577   7.346  1.00 12.95           O  
ATOM    233  N   ASN A  60     -10.685  -4.972   5.269  1.00 12.38           N  
ATOM    234  CA  ASN A  60     -11.660  -3.953   5.505  1.00 13.94           C  
ATOM    235  C   ASN A  60     -11.037  -2.600   5.532  1.00 14.16           C  
ATOM    236  O   ASN A  60     -11.102  -1.942   6.570  1.00 14.26           O  
ATOM    237  N   ILE A  61     -10.394  -2.148   4.441  1.00 11.08           N  
ATOM    238  CA  ILE A  61      -9.737  -0.893   4.243  1.00 11.78           C  
ATOM    239  C   ILE A  61     -10.611  -0.017   3.414  1.00 13.74           C  
ATOM    240  O   ILE A  61     -10.772  -0.300   2.228  1.00 14.60           O  
ATOM    241  N   GLN A  62     -11.299   0.980   3.999  1.00 13.97           N  
ATOM    242  CA  GLN A  62     -12.194   1.835   3.284  1.00 15.52           C  
ATOM    243  C   GLN A  62     -11.484   2.976   2.640  1.00 13.94           C  
ATOM    244  O   GLN A  62     -10.278   3.195   2.742  1.00 12.15           O  
ATOM    245  N   LYS A  63     -12.207   3.870   1.943  1.00 11.73           N  
ATOM    246  CA  LYS A  63     -11.623   5.054   1.392  1.00 11.97           C  
ATOM    247  C   LYS A  63     -11.101   6.063   2.355  1.00 10.41           C  
ATOM    248  O   LYS A  63     -11.505   6.095   3.516  1.00  9.59           O  
ATOM    249  N   GLU A  64     -10.180   6.908   1.857  1.00 10.04           N  
ATOM    250  CA  GLU A  64      -9.532   8.017   2.483  1.00 10.94           C  
ATOM    251  C   GLU A  64      -8.837   7.690   3.760  1.00  9.74           C  
ATOM    252  O   GLU A  64      -8.676   8.549   4.626  1.00  9.42           O  
ATOM    253  N   SER A  65      -8.419   6.415   3.840  1.00  6.85           N  
ATOM    254  CA  SER A  65      -7.473   5.952   4.808  1.00  6.90           C  
ATOM    255  C   SER A  65      -6.048   6.176   4.436  1.00  4.72           C  
ATOM    256  O   SER A  65      -5.704   6.237   3.257  1.00  3.91           O  
ATOM    257  N   THR A  66      -5.117   6.224   5.405  1.00  4.48           N  
ATOM    258  CA  THR A  66      -3.740   6.542   5.187  1.00  3.80           C  
ATOM    259  C   THR A  66      -2.826   5.382   5.383  1.00  4.60           C  
ATOM    260  O   THR A  66      -2.557   5.029   6.530  1.00  5.33           O  
ATOM    261  N   LEU A  67      -2.463   4.665   4.305  1.00  4.17           N  
ATOM    262  CA  LEU A  67      -1.589   3.533   4.293  1.00  3.85           C  
ATOM    263  C   LEU A  67      -0.152   3.927   4.332  1.00  3.80           C  
ATOM    264  O   LEU A  67       0.253   4.886   3.677  1.00  5.54           O  
ATOM    265  N   HIS A  68       0.703   3.189   5.062  1.00  2.94           N  
ATOM    266  CA  HIS A  68       2.038   3.589   5.385  1.00  4.17           C  
ATOM    267  C   HIS A  68       3.095   2.709   4.811  1.00  5.32           C  
ATOM    268  O   HIS A  68       3.109   1.519   5.123  1.00  7.70           O  
ATOM    269  N   LEU A  69       3.896   3.262   3.883  1.00  5.29           N  
ATOM    270  CA  LEU A  69       5.001   2.572   3.294  1.00  3.97           C  
ATOM    271  C   LEU A  69       6.295   2.655   4.029  1.00  5.07           C  
ATOM    272  O   LEU A  69       6.927   3.697   4.195  1.00  4.34           O  
ATOM    273  N   VAL A  70       6.746   1.479   4.500  1.00  4.29           N  
ATOM    274  CA  VAL A  70       7.980   1.167   5.153  1.00  6.26           C  
ATOM    275  C   VAL A  70       8.809   0.389   4.190  1.00  9.22           C  
ATOM    276  O   VAL A  70       8.263  -0.260   3.298  1.00  9.36           O  
TER
ENDMDL
MODEL      18
ATOM      1  N   GLN A   2     -10.416   5.772  -1.080  1.00  9.27           N  
ATOM      2  CA  GLN A   2      -9.172   6.475  -1.047  1.00  9.07           C  
ATOM      3  C   GLN A   2      -8.363   5.739  -0.035  1.00  8.72           C  
ATOM      4  O   GLN A   2      -8.952   5.395   0.989  1.00  8.22           O  
ATOM      5  N   ILE A   3      -7.077   5.474  -0.325  1.00  5.87           N  
ATOM      6  CA  ILE A   3      -6.163   5.029   0.680  1.00  5.07           C  
ATOM      7  C   ILE A   3      -4.990   5.948   0.681  1.00  4.01           C  
ATOM      8  O   ILE A   3      -4.673   6.426  -0.407  1.00  4.61           O  
ATOM      9  N   PHE A   4      -4.539   6.373   1.875  1.00  4.55           N  
ATOM     10  CA  PHE A   4      -3.283   7.018   2.101  1.00  4.68           C  
ATOM     11  C   PHE A   4      -2.118   6.130   2.369  1.00  5.30           C  
ATOM     12  O   PHE A   4      -2.200   5.166   3.129  1.00  5.58           O  
ATOM     13  N   VAL A   5      -0.991   6.404   1.688  1.00  4.44           N  
ATOM     14  CA  VAL A   5       0.205   5.634   1.839  1.00  3.87           C  
ATOM     15  C   VAL A   5       1.328   6.560   2.155  1.00  4.93           C  
ATOM     16  O   VAL A   5       1.801   7.321   1.312  1.00  6.84           O  
ATOM     17  N   LYS A   6       1.778   6.472   3.420  1.00  6.04           N  
ATOM     18  CA  LYS A   6       2.868   7.182   4.013  1.00  6.12           C  
ATOM     19  C   LYS A   6       4.177   6.483   3.884  1.00  6.57           C  
ATOM     20  O   LYS A   6       4.249   5.263   4.023  1.00  5.76           O  
ATOM     21  N   THR A   7       5.193   7.267   3.481  1.00  7.41           N  
ATOM     22  CA  THR A   7       6.499   6.758   3.201  1.00  7.48           C  
ATOM     23  C   THR A   7       7.291   6.794   4.462  1.00  8.75           C  
ATOM     24  O   THR A   7       6.710   7.053   5.514  1.00  8.58           O  
ATOM     25  N   LEU A   8       8.623   6.608   4.442  1.00  9.84           N  
ATOM     26  CA  LEU A   8       9.688   6.806   5.376  1.00 14.15           C  
ATOM     27  C   LEU A   8      10.017   8.231   5.657  1.00 17.37           C  
ATOM     28  O   LEU A   8       9.879   8.746   6.766  1.00 17.01           O  
ATOM     29  N   THR A   9      10.535   8.974   4.663  1.00 18.33           N  
ATOM     30  CA  THR A   9      10.910  10.346   4.816  1.00 19.24           C  
ATOM     31  C   THR A   9       9.826  11.319   5.130  1.00 19.48           C  
ATOM     32  O   THR A   9       9.621  11.620   6.305  1.00 23.14           O  
ATOM     33  N   GLY A  10       9.054  11.812   4.145  1.00 19.43           N  
ATOM     34  CA  GLY A  10       8.188  12.938   4.310  1.00 18.74           C  
ATOM     35  C   GLY A  10       7.212  13.024   3.187  1.00 17.62           C  
ATOM     36  O   GLY A  10       7.115  14.095   2.589  1.00 19.74           O  
ATOM     37  N   LYS A  11       6.556  11.912   2.809  1.00 13.56           N  
ATOM     38  CA  LYS A  11       5.552  11.910   1.790  1.00 11.91           C  
ATOM     39  C   LYS A  11       4.424  11.011   2.162  1.00 10.18           C  
ATOM     40  O   LYS A  11       4.585  10.026   2.880  1.00  9.10           O  
ATOM     41  N   THR A  12       3.218  11.405   1.715  1.00  9.63           N  
ATOM     42  CA  THR A  12       2.084  10.533   1.729  1.00  9.85           C  
ATOM     43  C   THR A  12       1.482  10.567   0.367  1.00 11.66           C  
ATOM     44  O   THR A  12       1.357  11.574  -0.328  1.00 12.33           O  
ATOM     45  N   ILE A  13       1.102   9.379  -0.138  1.00 10.42           N  
ATOM     46  CA  ILE A  13       0.586   9.152  -1.452  1.00 11.84           C  
ATOM     47  C   ILE A  13      -0.877   8.922  -1.285  1.00 10.55           C  
ATOM     48  O   ILE A  13      -1.313   8.049  -0.537  1.00 11.92           O  
ATOM     49  N   THR A  14      -1.646   9.785  -1.971  1.00  9.39           N  
ATOM     50  CA  THR A  14      -3.059   9.567  -2.021  1.00  9.63           C  
ATOM     51  C   THR A  14      -3.389   8.720  -3.202  1.00 11.20           C  
ATOM     52  O   THR A  14      -3.017   9.138  -4.297  1.00 11.63           O  
ATOM     53  N   LEU A  15      -4.008   7.541  -3.013  1.00  8.29           N  
ATOM     54  CA  LEU A  15      -4.408   6.670  -4.074  1.00  9.03           C  
ATOM     55  C   LEU A  15      -5.886   6.482  -4.044  1.00  8.59           C  
ATOM     56  O   LEU A  15      -6.373   6.153  -2.963  1.00  7.79           O  
ATOM     57  N   GLU A  16      -6.583   6.567  -5.191  1.00 11.04           N  
ATOM     58  CA  GLU A  16      -7.914   6.045  -5.209  1.00 11.50           C  
ATOM     59  C   GLU A  16      -7.822   4.604  -5.577  1.00 10.13           C  
ATOM     60  O   GLU A  16      -7.202   4.372  -6.614  1.00  9.83           O  
ATOM     61  N   VAL A  17      -8.450   3.616  -4.915  1.00  8.99           N  
ATOM     62  CA  VAL A  17      -8.499   2.197  -5.087  1.00  8.85           C  
ATOM     63  C   VAL A  17      -9.905   1.708  -5.031  1.00  8.04           C  
ATOM     64  O   VAL A  17     -10.833   2.414  -4.640  1.00  8.99           O  
ATOM     65  N   GLU A  18     -10.210   0.426  -5.300  1.00  7.29           N  
ATOM     66  CA  GLU A  18     -11.489  -0.203  -5.179  1.00  7.08           C  
ATOM     67  C   GLU A  18     -11.410  -1.388  -4.279  1.00  6.45           C  
ATOM     68  O   GLU A  18     -10.342  -1.995  -4.226  1.00  5.28           O  
ATOM     69  N   PRO A  19     -12.356  -1.736  -3.458  1.00  7.24           N  
ATOM     70  CA  PRO A  19     -12.096  -2.592  -2.337  1.00  7.07           C  
ATOM     71  C   PRO A  19     -11.640  -3.982  -2.622  1.00  6.65           C  
ATOM     72  O   PRO A  19     -10.930  -4.548  -1.792  1.00  6.37           O  
ATOM     73  N   SER A  20     -12.062  -4.507  -3.786  1.00  6.80           N  
ATOM     74  CA  SER A  20     -11.815  -5.838  -4.245  1.00  6.28           C  
ATOM     75  C   SER A  20     -10.519  -5.905  -4.978  1.00  8.45           C  
ATOM     76  O   SER A  20     -10.153  -7.014  -5.364  1.00  7.26           O  
ATOM     77  N   ASP A  21      -9.667  -4.871  -5.089  1.00  7.50           N  
ATOM     78  CA  ASP A  21      -8.338  -4.953  -5.611  1.00  7.70           C  
ATOM     79  C   ASP A  21      -7.446  -5.639  -4.634  1.00  7.08           C  
ATOM     80  O   ASP A  21      -7.583  -5.642  -3.412  1.00  8.11           O  
ATOM     81  N   THR A  22      -6.429  -6.270  -5.247  1.00  5.37           N  
ATOM     82  CA  THR A  22      -5.345  -6.892  -4.551  1.00  6.01           C  
ATOM     83  C   THR A  22      -4.301  -5.893  -4.186  1.00  8.01           C  
ATOM     84  O   THR A  22      -4.164  -4.824  -4.779  1.00  8.11           O  
ATOM     85  N   ILE A  23      -3.487  -6.233  -3.172  1.00  8.32           N  
ATOM     86  CA  ILE A  23      -2.398  -5.422  -2.720  1.00  9.92           C  
ATOM     87  C   ILE A  23      -1.328  -5.355  -3.755  1.00 10.01           C  
ATOM     88  O   ILE A  23      -0.706  -4.304  -3.895  1.00  8.71           O  
ATOM     89  N   GLU A  24      -1.145  -6.376  -4.611  1.00  9.54           N  
ATOM     90  CA  GLU A  24      -0.525  -6.450  -5.898  1.00 11.81           C  
ATOM     91  C   GLU A  24      -0.931  -5.425  -6.900  1.00 11.14           C  
ATOM     92  O   GLU A  24      -0.116  -4.825  -7.599  1.00 10.62           O  
ATOM     93  N   ASN A  25      -2.213  -5.031  -7.004  1.00  9.43           N  
ATOM     94  CA  ASN A  25      -2.710  -4.061  -7.930  1.00 10.96           C  
ATOM     95  C   ASN A  25      -2.636  -2.699  -7.330  1.00  9.68           C  
ATOM     96  O   ASN A  25      -2.741  -1.661  -7.982  1.00  9.33           O  
ATOM     97  N   VAL A  26      -2.484  -2.537  -6.004  1.00  6.52           N  
ATOM     98  CA  VAL A  26      -2.276  -1.314  -5.293  1.00  5.53           C  
ATOM     99  C   VAL A  26      -0.836  -0.981  -5.485  1.00  4.42           C  
ATOM    100  O   VAL A  26      -0.444   0.169  -5.673  1.00  3.40           O  
ATOM    101  N   LYS A  27       0.002  -2.032  -5.529  1.00  2.64           N  
ATOM    102  CA  LYS A  27       1.395  -1.825  -5.773  1.00  4.14           C  
ATOM    103  C   LYS A  27       1.668  -1.372  -7.166  1.00  5.58           C  
ATOM    104  O   LYS A  27       2.559  -0.596  -7.506  1.00  4.11           O  
ATOM    105  N   ALA A  28       0.815  -1.780  -8.123  1.00  6.61           N  
ATOM    106  CA  ALA A  28       0.810  -1.412  -9.504  1.00  7.74           C  
ATOM    107  C   ALA A  28       0.687   0.050  -9.764  1.00  9.17           C  
ATOM    108  O   ALA A  28       1.339   0.678 -10.597  1.00 11.45           O  
ATOM    109  N   LYS A  29      -0.087   0.671  -8.855  1.00  8.96           N  
ATOM    110  CA  LYS A  29      -0.297   2.084  -8.795  1.00  7.90           C  
ATOM    111  C   LYS A  29       0.750   2.848  -8.060  1.00  6.92           C  
ATOM    112  O   LYS A  29       0.919   4.047  -8.273  1.00  6.87           O  
ATOM    113  N   ILE A  30       1.596   2.279  -7.183  1.00  4.57           N  
ATOM    114  CA  ILE A  30       2.779   2.838  -6.605  1.00  5.58           C  
ATOM    115  C   ILE A  30       3.955   2.773  -7.517  1.00  7.26           C  
ATOM    116  O   ILE A  30       4.754   3.701  -7.632  1.00  9.46           O  
ATOM    117  N   GLN A  31       4.074   1.707  -8.329  1.00  7.06           N  
ATOM    118  CA  GLN A  31       4.892   1.665  -9.501  1.00  8.67           C  
ATOM    119  C   GLN A  31       4.604   2.774 -10.453  1.00 10.90           C  
ATOM    120  O   GLN A  31       5.558   3.380 -10.939  1.00  9.63           O  
ATOM    121  N   ASP A  32       3.358   3.028 -10.890  1.00 10.93           N  
ATOM    122  CA  ASP A  32       3.190   4.031 -11.896  1.00 14.01           C  
ATOM    123  C   ASP A  32       3.390   5.431 -11.428  1.00 14.04           C  
ATOM    124  O   ASP A  32       3.747   6.361 -12.149  1.00 13.39           O  
ATOM    125  N   LYS A  33       3.150   5.702 -10.133  1.00 14.22           N  
ATOM    126  CA  LYS A  33       3.271   6.946  -9.438  1.00 14.00           C  
ATOM    127  C   LYS A  33       4.698   7.296  -9.193  1.00 12.37           C  
ATOM    128  O   LYS A  33       5.190   8.341  -9.617  1.00 12.17           O  
ATOM    129  N   GLU A  34       5.463   6.432  -8.503  1.00 10.11           N  
ATOM    130  CA  GLU A  34       6.771   6.693  -7.987  1.00 10.07           C  
ATOM    131  C   GLU A  34       7.796   5.878  -8.698  1.00  9.32           C  
ATOM    132  O   GLU A  34       8.936   6.293  -8.903  1.00 11.61           O  
ATOM    133  N   GLY A  35       7.455   4.684  -9.216  1.00  7.22           N  
ATOM    134  CA  GLY A  35       8.456   3.886  -9.852  1.00  6.29           C  
ATOM    135  C   GLY A  35       9.331   3.059  -8.974  1.00  6.93           C  
ATOM    136  O   GLY A  35      10.464   2.762  -9.351  1.00  7.41           O  
ATOM    137  N   ILE A  36       8.784   2.666  -7.809  1.00  5.86           N  
ATOM    138  CA  ILE A  36       9.286   1.608  -6.989  1.00  6.07           C  
ATOM    139  C   ILE A  36       8.852   0.283  -7.514  1.00  6.36           C  
ATOM    140  O   ILE A  36       7.643   0.165  -7.710  1.00  6.18           O  
ATOM    141  N   PRO A  37       9.698  -0.627  -7.895  1.00  8.65           N  
ATOM    142  CA  PRO A  37       9.227  -1.924  -8.284  1.00  9.18           C  
ATOM    143  C   PRO A  37       8.596  -2.697  -7.177  1.00  9.85           C  
ATOM    144  O   PRO A  37       8.918  -2.411  -6.025  1.00  8.51           O  
ATOM    145  N   PRO A  38       7.739  -3.660  -7.344  1.00  8.71           N  
ATOM    146  CA  PRO A  38       7.040  -4.352  -6.301  1.00  9.08           C  
ATOM    147  C   PRO A  38       7.772  -5.242  -5.356  1.00  9.28           C  
ATOM    148  O   PRO A  38       7.174  -5.513  -4.316  1.00  6.50           O  
ATOM    149  N   ASP A  39       9.043  -5.580  -5.636  1.00 11.20           N  
ATOM    150  CA  ASP A  39       9.768  -6.392  -4.707  1.00 14.96           C  
ATOM    151  C   ASP A  39      10.291  -5.700  -3.496  1.00 13.99           C  
ATOM    152  O   ASP A  39      10.387  -6.203  -2.378  1.00 13.75           O  
ATOM    153  N   GLN A  40      10.747  -4.460  -3.750  1.00 11.60           N  
ATOM    154  CA  GLN A  40      11.119  -3.469  -2.788  1.00 10.76           C  
ATOM    155  C   GLN A  40      10.074  -2.975  -1.848  1.00  8.01           C  
ATOM    156  O   GLN A  40      10.365  -2.703  -0.684  1.00  8.96           O  
ATOM    157  N   GLN A  41       8.828  -2.945  -2.354  1.00  6.52           N  
ATOM    158  CA  GLN A  41       7.647  -2.487  -1.691  1.00  3.87           C  
ATOM    159  C   GLN A  41       7.154  -3.369  -0.596  1.00  4.79           C  
ATOM    160  O   GLN A  41       6.814  -4.514  -0.892  1.00  6.34           O  
ATOM    161  N   ARG A  42       6.987  -2.902   0.654  1.00  5.73           N  
ATOM    162  CA  ARG A  42       6.234  -3.646   1.616  1.00  6.97           C  
ATOM    163  C   ARG A  42       5.264  -2.746   2.301  1.00  7.15           C  
ATOM    164  O   ARG A  42       5.649  -1.794   2.977  1.00  7.33           O  
ATOM    165  N   LEU A  43       3.961  -3.033   2.127  1.00  4.65           N  
ATOM    166  CA  LEU A  43       2.875  -2.267   2.654  1.00  3.51           C  
ATOM    167  C   LEU A  43       2.471  -2.732   4.011  1.00  5.56           C  
ATOM    168  O   LEU A  43       1.967  -3.847   4.134  1.00  4.19           O  
ATOM    169  N   ILE A  44       2.624  -1.887   5.046  1.00  4.58           N  
ATOM    170  CA  ILE A  44       2.266  -2.205   6.394  1.00  5.55           C  
ATOM    171  C   ILE A  44       0.907  -1.667   6.680  1.00  5.46           C  
ATOM    172  O   ILE A  44       0.661  -0.506   6.358  1.00  6.04           O  
ATOM    173  N   PHE A  45      -0.030  -2.377   7.334  1.00  6.75           N  
ATOM    174  CA  PHE A  45      -1.198  -1.824   7.946  1.00  4.70           C  
ATOM    175  C   PHE A  45      -1.025  -2.084   9.403  1.00  6.34           C  
ATOM    176  O   PHE A  45      -1.111  -3.215   9.879  1.00  5.45           O  
ATOM    177  N   ALA A  46      -0.936  -1.000  10.194  1.00  6.53           N  
ATOM    178  CA  ALA A  46      -0.731  -0.930  11.607  1.00  7.15           C  
ATOM    179  C   ALA A  46       0.641  -1.430  11.902  1.00  9.00           C  
ATOM    180  O   ALA A  46       1.539  -0.593  11.812  1.00 11.15           O  
ATOM    181  N   GLY A  47       0.871  -2.718  12.214  1.00  9.35           N  
ATOM    182  CA  GLY A  47       2.148  -3.346  12.352  1.00 11.68           C  
ATOM    183  C   GLY A  47       2.184  -4.568  11.499  1.00 11.14           C  
ATOM    184  O   GLY A  47       3.140  -5.328  11.641  1.00 13.93           O  
ATOM    185  N   LYS A  48       1.164  -4.890  10.684  1.00 10.47           N  
ATOM    186  CA  LYS A  48       1.114  -6.144   9.999  1.00  8.82           C  
ATOM    187  C   LYS A  48       1.468  -6.059   8.554  1.00  7.68           C  
ATOM    188  O   LYS A  48       1.144  -5.041   7.944  1.00  6.47           O  
ATOM    189  N   GLN A  49       2.148  -7.086   8.016  1.00  8.89           N  
ATOM    190  CA  GLN A  49       2.382  -7.172   6.608  1.00  7.18           C  
ATOM    191  C   GLN A  49       1.207  -7.443   5.733  1.00  8.23           C  
ATOM    192  O   GLN A  49       0.403  -8.356   5.916  1.00  9.70           O  
ATOM    193  N   LEU A  50       1.085  -6.764   4.579  1.00  6.51           N  
ATOM    194  CA  LEU A  50       0.048  -7.050   3.637  1.00  7.41           C  
ATOM    195  C   LEU A  50       0.648  -7.749   2.467  1.00  8.27           C  
ATOM    196  O   LEU A  50       1.450  -7.145   1.756  1.00  8.34           O  
ATOM    197  N   GLU A  51       0.212  -8.996   2.213  1.00  9.43           N  
ATOM    198  CA  GLU A  51       0.685  -9.745   1.090  1.00 11.90           C  
ATOM    199  C   GLU A  51      -0.065  -9.461  -0.165  1.00 11.49           C  
ATOM    200  O   GLU A  51      -1.223  -9.049  -0.196  1.00  9.88           O  
ATOM    201  N   ASP A  52       0.656  -9.619  -1.290  1.00 12.71           N  
ATOM    202  CA  ASP A  52       0.215  -9.213  -2.589  1.00 16.56           C  
ATOM    203  C   ASP A  52      -1.094  -9.731  -3.078  1.00 15.83           C  
ATOM    204  O   ASP A  52      -1.969  -8.965  -3.480  1.00 17.21           O  
ATOM    205  N   GLY A  53      -1.347 -11.049  -2.994  1.00 15.00           N  
ATOM    206  CA  GLY A  53      -2.554 -11.599  -3.530  1.00 11.77           C  
ATOM    207  C   GLY A  53      -3.851 -11.352  -2.839  1.00 11.10           C  
ATOM    208  O   GLY A  53      -4.936 -11.539  -3.386  1.00 11.25           O  
ATOM    209  N   ARG A  54      -3.858 -10.918  -1.566  1.00  8.53           N  
ATOM    210  CA  ARG A  54      -5.064 -10.630  -0.852  1.00  9.05           C  
ATOM    211  C   ARG A  54      -5.684  -9.335  -1.250  1.00  8.96           C  
ATOM    212  O   ARG A  54      -5.038  -8.521  -1.908  1.00 11.60           O  
ATOM    213  N   THR A  55      -6.915  -9.027  -0.803  1.00  9.05           N  
ATOM    214  CA  THR A  55      -7.565  -7.779  -1.058  1.00  9.03           C  
ATOM    215  C   THR A  55      -7.484  -6.831   0.088  1.00  8.15           C  
ATOM    216  O   THR A  55      -7.249  -7.157   1.251  1.00  5.91           O  
ATOM    217  N   LEU A  56      -7.850  -5.579  -0.241  1.00  6.91           N  
ATOM    218  CA  LEU A  56      -8.184  -4.511   0.649  1.00  8.29           C  
ATOM    219  C   LEU A  56      -9.260  -4.899   1.604  1.00  8.05           C  
ATOM    220  O   LEU A  56      -9.199  -4.663   2.809  1.00 10.17           O  
ATOM    221  N   SER A  57     -10.296  -5.535   1.027  1.00  8.92           N  
ATOM    222  CA  SER A  57     -11.418  -5.916   1.828  1.00  9.00           C  
ATOM    223  C   SER A  57     -11.144  -7.116   2.667  1.00  9.44           C  
ATOM    224  O   SER A  57     -11.868  -7.293   3.646  1.00 10.91           O  
ATOM    225  N   ASP A  58     -10.159  -7.957   2.303  1.00  9.11           N  
ATOM    226  CA  ASP A  58      -9.695  -9.100   3.025  1.00  7.91           C  
ATOM    227  C   ASP A  58      -9.034  -8.649   4.282  1.00  9.12           C  
ATOM    228  O   ASP A  58      -9.261  -9.173   5.371  1.00  8.61           O  
ATOM    229  N   TYR A  59      -8.126  -7.660   4.206  1.00  7.97           N  
ATOM    230  CA  TYR A  59      -7.402  -7.097   5.303  1.00  8.45           C  
ATOM    231  C   TYR A  59      -8.051  -6.006   6.083  1.00 10.98           C  
ATOM    232  O   TYR A  59      -7.490  -5.395   6.991  1.00 12.95           O  
ATOM    233  N   ASN A  60      -9.317  -5.718   5.733  1.00 12.38           N  
ATOM    234  CA  ASN A  60     -10.204  -4.789   6.363  1.00 13.94           C  
ATOM    235  C   ASN A  60      -9.692  -3.400   6.197  1.00 14.16           C  
ATOM    236  O   ASN A  60      -9.614  -2.674   7.187  1.00 14.26           O  
ATOM    237  N   ILE A  61      -9.258  -3.025   4.981  1.00 11.08           N  
ATOM    238  CA  ILE A  61      -8.692  -1.762   4.620  1.00 11.78           C  
ATOM    239  C   ILE A  61      -9.770  -0.935   4.007  1.00 13.74           C  
ATOM    240  O   ILE A  61     -10.260  -1.245   2.922  1.00 14.60           O
[truncated: 2,464,867 more chars]
