# Supplementary material for: ENCORE: Software for Quantitative Ensemble Comparison
Source: PLoS Comput Biol. 2015 Oct 27;11(10):e1004415. doi: 10.1371/journal.pcbi.1004415 (PMC4624683; doi:10.1371/journal.pcbi.1004415)
Supplement: S1 Software — (GZ) [file pcbi.1004415.s001.gz › encore-master/examples/experimental_ubq_ensembles/filtered_2K39.pdb]

MODEL      1
ATOM      1  N   GLN A   2      14.825  31.962  19.581  1.00  0.00           N  
ATOM      2  CA  GLN A   2      15.958  32.639  20.166  1.00  0.00           C  
ATOM      3  C   GLN A   2      16.592  31.548  21.022  1.00  0.00           C  
ATOM      4  O   GLN A   2      15.852  31.036  21.862  1.00  0.00           O  
ATOM      5  N   ILE A   3      17.919  31.368  20.975  1.00  0.00           N  
ATOM      6  CA  ILE A   3      18.793  30.563  21.808  1.00  0.00           C  
ATOM      7  C   ILE A   3      19.967  31.469  22.174  1.00  0.00           C  
ATOM      8  O   ILE A   3      20.312  32.438  21.505  1.00  0.00           O  
ATOM      9  N   PHE A   4      20.616  31.098  23.275  1.00  0.00           N  
ATOM     10  CA  PHE A   4      21.758  31.719  23.917  1.00  0.00           C  
ATOM     11  C   PHE A   4      22.886  30.687  23.963  1.00  0.00           C  
ATOM     12  O   PHE A   4      22.610  29.489  24.030  1.00  0.00           O  
ATOM     13  N   VAL A   5      24.117  31.184  23.941  1.00  0.00           N  
ATOM     14  CA  VAL A   5      25.321  30.442  24.237  1.00  0.00           C  
ATOM     15  C   VAL A   5      26.124  31.308  25.214  1.00  0.00           C  
ATOM     16  O   VAL A   5      26.193  32.522  25.028  1.00  0.00           O  
ATOM     17  N   LYS A   6      26.630  30.634  26.238  1.00  0.00           N  
ATOM     18  CA  LYS A   6      27.541  31.152  27.232  1.00  0.00           C  
ATOM     19  C   LYS A   6      28.967  30.657  26.967  1.00  0.00           C  
ATOM     20  O   LYS A   6      29.223  29.465  26.990  1.00  0.00           O  
ATOM     21  N   THR A   7      29.862  31.633  26.759  1.00  0.00           N  
ATOM     22  CA  THR A   7      31.247  31.407  26.403  1.00  0.00           C  
ATOM     23  C   THR A   7      32.034  31.500  27.715  1.00  0.00           C  
ATOM     24  O   THR A   7      31.809  32.439  28.473  1.00  0.00           O  
ATOM     25  N   LEU A   8      32.973  30.576  27.880  1.00  0.00           N  
ATOM     26  CA  LEU A   8      34.014  30.392  28.869  1.00  0.00           C  
ATOM     27  C   LEU A   8      34.448  31.718  29.480  1.00  0.00           C  
ATOM     28  O   LEU A   8      34.813  31.843  30.641  1.00  0.00           O  
ATOM     29  N   THR A   9      34.603  32.726  28.617  1.00  0.00           N  
ATOM     30  CA  THR A   9      35.225  33.996  28.914  1.00  0.00           C  
ATOM     31  C   THR A   9      34.214  34.947  29.581  1.00  0.00           C  
ATOM     32  O   THR A   9      34.669  35.893  30.211  1.00  0.00           O  
ATOM     33  N   GLY A  10      32.921  34.654  29.493  1.00  0.00           N  
ATOM     34  CA  GLY A  10      31.922  35.451  30.171  1.00  0.00           C  
ATOM     35  C   GLY A  10      31.007  36.181  29.191  1.00  0.00           C  
ATOM     36  O   GLY A  10      30.062  36.820  29.639  1.00  0.00           O  
ATOM     37  N   LYS A  11      31.253  36.101  27.882  1.00  0.00           N  
ATOM     38  CA  LYS A  11      30.524  36.681  26.770  1.00  0.00           C  
ATOM     39  C   LYS A  11      29.284  35.876  26.376  1.00  0.00           C  
ATOM     40  O   LYS A  11      29.269  34.655  26.276  1.00  0.00           O  
ATOM     41  N   THR A  12      28.191  36.619  26.215  1.00  0.00           N  
ATOM     42  CA  THR A  12      26.852  36.097  26.048  1.00  0.00           C  
ATOM     43  C   THR A  12      26.607  36.315  24.556  1.00  0.00           C  
ATOM     44  O   THR A  12      26.729  37.414  24.018  1.00  0.00           O  
ATOM     45  N   ILE A  13      26.191  35.285  23.828  1.00  0.00           N  
ATOM     46  CA  ILE A  13      26.030  35.321  22.388  1.00  0.00           C  
ATOM     47  C   ILE A  13      24.608  34.771  22.201  1.00  0.00           C  
ATOM     48  O   ILE A  13      24.275  33.742  22.780  1.00  0.00           O  
ATOM     49  N   THR A  14      23.815  35.411  21.349  1.00  0.00           N  
ATOM     50  CA  THR A  14      22.480  34.927  21.037  1.00  0.00           C  
ATOM     51  C   THR A  14      22.318  34.806  19.518  1.00  0.00           C  
ATOM     52  O   THR A  14      22.719  35.683  18.768  1.00  0.00           O  
ATOM     53  N   LEU A  15      21.547  33.844  19.007  1.00  0.00           N  
ATOM     54  CA  LEU A  15      21.277  33.571  17.615  1.00  0.00           C  
ATOM     55  C   LEU A  15      19.818  33.127  17.516  1.00  0.00           C  
ATOM     56  O   LEU A  15      19.447  32.271  18.321  1.00  0.00           O  
ATOM     57  N   GLU A  16      19.038  33.713  16.616  1.00  0.00           N  
ATOM     58  CA  GLU A  16      17.739  33.241  16.170  1.00  0.00           C  
ATOM     59  C   GLU A  16      18.031  32.068  15.237  1.00  0.00           C  
ATOM     60  O   GLU A  16      18.841  32.252  14.333  1.00  0.00           O  
ATOM     61  N   VAL A  17      17.458  30.909  15.545  1.00  0.00           N  
ATOM     62  CA  VAL A  17      17.691  29.680  14.814  1.00  0.00           C  
ATOM     63  C   VAL A  17      16.315  29.043  14.673  1.00  0.00           C  
ATOM     64  O   VAL A  17      15.293  29.390  15.265  1.00  0.00           O  
ATOM     65  N   GLU A  18      16.270  27.948  13.911  1.00  0.00           N  
ATOM     66  CA  GLU A  18      15.107  27.098  13.722  1.00  0.00           C  
ATOM     67  C   GLU A  18      15.464  25.871  14.566  1.00  0.00           C  
ATOM     68  O   GLU A  18      16.643  25.510  14.626  1.00  0.00           O  
ATOM     69  N   PRO A  19      14.544  25.072  15.091  1.00  0.00           N  
ATOM     70  CA  PRO A  19      14.685  23.794  15.755  1.00  0.00           C  
ATOM     71  C   PRO A  19      15.091  22.647  14.833  1.00  0.00           C  
ATOM     72  O   PRO A  19      15.820  21.808  15.373  1.00  0.00           O  
ATOM     73  N   SER A  20      14.763  22.617  13.542  1.00  0.00           N  
ATOM     74  CA  SER A  20      15.204  21.649  12.566  1.00  0.00           C  
ATOM     75  C   SER A  20      16.664  21.757  12.141  1.00  0.00           C  
ATOM     76  O   SER A  20      17.114  20.830  11.476  1.00  0.00           O  
ATOM     77  N   ASP A  21      17.400  22.845  12.367  1.00  0.00           N  
ATOM     78  CA  ASP A  21      18.815  23.002  12.060  1.00  0.00           C  
ATOM     79  C   ASP A  21      19.597  22.026  12.943  1.00  0.00           C  
ATOM     80  O   ASP A  21      19.462  21.914  14.161  1.00  0.00           O  
ATOM     81  N   THR A  22      20.508  21.330  12.273  1.00  0.00           N  
ATOM     82  CA  THR A  22      21.690  20.718  12.852  1.00  0.00           C  
ATOM     83  C   THR A  22      22.489  21.549  13.859  1.00  0.00           C  
ATOM     84  O   THR A  22      22.450  22.776  13.798  1.00  0.00           O  
ATOM     85  N   ILE A  23      23.140  20.924  14.834  1.00  0.00           N  
ATOM     86  CA  ILE A  23      24.023  21.599  15.760  1.00  0.00           C  
ATOM     87  C   ILE A  23      25.240  22.121  14.995  1.00  0.00           C  
ATOM     88  O   ILE A  23      25.704  23.224  15.255  1.00  0.00           O  
ATOM     89  N   GLU A  24      25.827  21.423  14.031  1.00  0.00           N  
ATOM     90  CA  GLU A  24      26.929  21.675  13.131  1.00  0.00           C  
ATOM     91  C   GLU A  24      26.808  22.946  12.294  1.00  0.00           C  
ATOM     92  O   GLU A  24      27.821  23.620  12.071  1.00  0.00           O  
ATOM     93  N   ASN A  25      25.585  23.245  11.849  1.00  0.00           N  
ATOM     94  CA  ASN A  25      25.273  24.584  11.402  1.00  0.00           C  
ATOM     95  C   ASN A  25      25.565  25.747  12.357  1.00  0.00           C  
ATOM     96  O   ASN A  25      26.302  26.643  11.961  1.00  0.00           O  
ATOM     97  N   VAL A  26      25.142  25.676  13.616  1.00  0.00           N  
ATOM     98  CA  VAL A  26      25.262  26.709  14.635  1.00  0.00           C  
ATOM     99  C   VAL A  26      26.683  26.826  15.188  1.00  0.00           C  
ATOM    100  O   VAL A  26      27.036  27.872  15.737  1.00  0.00           O  
ATOM    101  N   LYS A  27      27.596  25.887  14.965  1.00  0.00           N  
ATOM    102  CA  LYS A  27      29.025  25.937  15.201  1.00  0.00           C  
ATOM    103  C   LYS A  27      29.674  26.739  14.067  1.00  0.00           C  
ATOM    104  O   LYS A  27      30.647  27.461  14.262  1.00  0.00           O  
ATOM    105  N   ALA A  28      29.168  26.713  12.835  1.00  0.00           N  
ATOM    106  CA  ALA A  28      29.682  27.462  11.705  1.00  0.00           C  
ATOM    107  C   ALA A  28      29.060  28.859  11.669  1.00  0.00           C  
ATOM    108  O   ALA A  28      29.757  29.821  11.349  1.00  0.00           O  
ATOM    109  N   LYS A  29      27.840  29.078  12.155  1.00  0.00           N  
ATOM    110  CA  LYS A  29      27.250  30.382  12.387  1.00  0.00           C  
ATOM    111  C   LYS A  29      28.074  31.099  13.455  1.00  0.00           C  
ATOM    112  O   LYS A  29      28.179  32.318  13.291  1.00  0.00           O  
ATOM    113  N   ILE A  30      28.705  30.497  14.458  1.00  0.00           N  
ATOM    114  CA  ILE A  30      29.685  31.198  15.253  1.00  0.00           C  
ATOM    115  C   ILE A  30      30.928  31.576  14.443  1.00  0.00           C  
ATOM    116  O   ILE A  30      31.625  32.488  14.870  1.00  0.00           O  
ATOM    117  N   GLN A  31      31.337  30.856  13.394  1.00  0.00           N  
ATOM    118  CA  GLN A  31      32.579  31.159  12.706  1.00  0.00           C  
ATOM    119  C   GLN A  31      32.334  32.431  11.883  1.00  0.00           C  
ATOM    120  O   GLN A  31      33.105  33.384  11.989  1.00  0.00           O  
ATOM    121  N   ASP A  32      31.165  32.595  11.272  1.00  0.00           N  
ATOM    122  CA  ASP A  32      30.556  33.768  10.672  1.00  0.00           C  
ATOM    123  C   ASP A  32      30.502  34.975  11.612  1.00  0.00           C  
ATOM    124  O   ASP A  32      31.032  36.009  11.217  1.00  0.00           O  
ATOM    125  N   LYS A  33      30.024  34.742  12.827  1.00  0.00           N  
ATOM    126  CA  LYS A  33      29.711  35.760  13.810  1.00  0.00           C  
ATOM    127  C   LYS A  33      30.857  36.174  14.744  1.00  0.00           C  
ATOM    128  O   LYS A  33      31.047  37.360  14.981  1.00  0.00           O  
ATOM    129  N   GLU A  34      31.696  35.231  15.155  1.00  0.00           N  
ATOM    130  CA  GLU A  34      32.551  35.430  16.306  1.00  0.00           C  
ATOM    131  C   GLU A  34      33.968  34.914  16.023  1.00  0.00           C  
ATOM    132  O   GLU A  34      34.978  35.396  16.519  1.00  0.00           O  
ATOM    133  N   GLY A  35      34.079  34.127  14.950  1.00  0.00           N  
ATOM    134  CA  GLY A  35      35.326  33.980  14.241  1.00  0.00           C  
ATOM    135  C   GLY A  35      35.889  32.597  14.585  1.00  0.00           C  
ATOM    136  O   GLY A  35      37.022  32.329  14.163  1.00  0.00           O  
ATOM    137  N   ILE A  36      35.212  31.683  15.265  1.00  0.00           N  
ATOM    138  CA  ILE A  36      35.724  30.511  15.944  1.00  0.00           C  
ATOM    139  C   ILE A  36      35.452  29.294  15.054  1.00  0.00           C  
ATOM    140  O   ILE A  36      34.322  29.279  14.569  1.00  0.00           O  
ATOM    141  N   PRO A  37      36.371  28.371  14.788  1.00  0.00           N  
ATOM    142  CA  PRO A  37      36.098  27.256  13.912  1.00  0.00           C  
ATOM    143  C   PRO A  37      35.227  26.169  14.535  1.00  0.00           C  
ATOM    144  O   PRO A  37      35.299  25.951  15.743  1.00  0.00           O  
ATOM    145  N   PRO A  38      34.421  25.399  13.803  1.00  0.00           N  
ATOM    146  CA  PRO A  38      33.763  24.187  14.226  1.00  0.00           C  
ATOM    147  C   PRO A  38      34.557  23.114  14.976  1.00  0.00           C  
ATOM    148  O   PRO A  38      33.974  22.615  15.938  1.00  0.00           O  
ATOM    149  N   ASP A  39      35.795  22.882  14.546  1.00  0.00           N  
ATOM    150  CA  ASP A  39      36.717  21.819  14.908  1.00  0.00           C  
ATOM    151  C   ASP A  39      37.079  21.712  16.392  1.00  0.00           C  
ATOM    152  O   ASP A  39      36.991  20.662  17.026  1.00  0.00           O  
ATOM    153  N   GLN A  40      37.349  22.891  16.960  1.00  0.00           N  
ATOM    154  CA  GLN A  40      37.841  22.982  18.323  1.00  0.00           C  
ATOM    155  C   GLN A  40      36.729  23.348  19.315  1.00  0.00           C  
ATOM    156  O   GLN A  40      36.987  23.258  20.506  1.00  0.00           O  
ATOM    157  N   GLN A  41      35.527  23.548  18.776  1.00  0.00           N  
ATOM    158  CA  GLN A  41      34.326  23.901  19.502  1.00  0.00           C  
ATOM    159  C   GLN A  41      33.456  22.689  19.849  1.00  0.00           C  
ATOM    160  O   GLN A  41      33.181  21.931  18.916  1.00  0.00           O  
ATOM    161  N   ARG A  42      33.093  22.468  21.105  1.00  0.00           N  
ATOM    162  CA  ARG A  42      32.164  21.483  21.614  1.00  0.00           C  
ATOM    163  C   ARG A  42      31.081  22.206  22.426  1.00  0.00           C  
ATOM    164  O   ARG A  42      31.436  23.068  23.237  1.00  0.00           O  
ATOM    165  N   LEU A  43      29.812  21.891  22.207  1.00  0.00           N  
ATOM    166  CA  LEU A  43      28.719  22.625  22.794  1.00  0.00           C  
ATOM    167  C   LEU A  43      28.012  21.729  23.816  1.00  0.00           C  
ATOM    168  O   LEU A  43      27.793  20.567  23.494  1.00  0.00           O  
ATOM    169  N   ILE A  44      27.421  22.369  24.830  1.00  0.00           N  
ATOM    170  CA  ILE A  44      26.913  21.758  26.037  1.00  0.00           C  
ATOM    171  C   ILE A  44      25.484  22.270  26.230  1.00  0.00           C  
ATOM    172  O   ILE A  44      25.273  23.485  26.196  1.00  0.00           O  
ATOM    173  N   PHE A  45      24.539  21.371  26.487  1.00  0.00           N  
ATOM    174  CA  PHE A  45      23.166  21.541  26.910  1.00  0.00           C  
ATOM    175  C   PHE A  45      22.770  20.452  27.909  1.00  0.00           C  
ATOM    176  O   PHE A  45      22.720  19.270  27.561  1.00  0.00           O  
ATOM    177  N   ALA A  46      22.414  20.856  29.128  1.00  0.00           N  
ATOM    178  CA  ALA A  46      21.831  20.048  30.182  1.00  0.00           C  
ATOM    179  C   ALA A  46      22.834  18.992  30.656  1.00  0.00           C  
ATOM    180  O   ALA A  46      22.510  17.938  31.200  1.00  0.00           O  
ATOM    181  N   GLY A  47      24.114  19.297  30.508  1.00  0.00           N  
ATOM    182  CA  GLY A  47      25.235  18.479  30.938  1.00  0.00           C  
ATOM    183  C   GLY A  47      25.904  17.718  29.783  1.00  0.00           C  
ATOM    184  O   GLY A  47      27.033  17.270  29.967  1.00  0.00           O  
ATOM    185  N   LYS A  48      25.183  17.546  28.678  1.00  0.00           N  
ATOM    186  CA  LYS A  48      25.605  16.586  27.677  1.00  0.00           C  
ATOM    187  C   LYS A  48      26.413  17.372  26.643  1.00  0.00           C  
ATOM    188  O   LYS A  48      26.081  18.502  26.275  1.00  0.00           O  
ATOM    189  N   GLN A  49      27.461  16.746  26.115  1.00  0.00           N  
ATOM    190  CA  GLN A  49      28.033  17.181  24.851  1.00  0.00           C  
ATOM    191  C   GLN A  49      27.103  16.843  23.683  1.00  0.00           C  
ATOM    192  O   GLN A  49      26.597  15.734  23.579  1.00  0.00           O  
ATOM    193  N   LEU A  50      26.958  17.787  22.756  1.00  0.00           N  
ATOM    194  CA  LEU A  50      25.998  17.732  21.671  1.00  0.00           C  
ATOM    195  C   LEU A  50      26.822  17.389  20.428  1.00  0.00           C  
ATOM    196  O   LEU A  50      27.923  17.902  20.256  1.00  0.00           O  
ATOM    197  N   GLU A  51      26.271  16.537  19.569  1.00  0.00           N  
ATOM    198  CA  GLU A  51      27.070  15.621  18.786  1.00  0.00           C  
ATOM    199  C   GLU A  51      26.560  15.863  17.359  1.00  0.00           C  
ATOM    200  O   GLU A  51      25.472  16.388  17.125  1.00  0.00           O  
ATOM    201  N   ASP A  52      27.437  15.509  16.423  1.00  0.00           N  
ATOM    202  CA  ASP A  52      27.147  15.482  14.996  1.00  0.00           C  
ATOM    203  C   ASP A  52      25.989  14.533  14.687  1.00  0.00           C  
ATOM    204  O   ASP A  52      25.841  13.473  15.286  1.00  0.00           O  
ATOM    205  N   GLY A  53      25.148  14.994  13.757  1.00  0.00           N  
ATOM    206  CA  GLY A  53      24.234  14.089  13.091  1.00  0.00           C  
ATOM    207  C   GLY A  53      22.837  14.642  13.360  1.00  0.00           C  
ATOM    208  O   GLY A  53      21.983  14.754  12.481  1.00  0.00           O  
ATOM    209  N   ARG A  54      22.636  14.962  14.636  1.00  0.00           N  
ATOM    210  CA  ARG A  54      21.347  15.227  15.226  1.00  0.00           C  
ATOM    211  C   ARG A  54      21.106  16.735  15.369  1.00  0.00           C  
ATOM    212  O   ARG A  54      21.895  17.541  14.881  1.00  0.00           O  
ATOM    213  N   THR A  55      19.933  17.145  15.819  1.00  0.00           N  
ATOM    214  CA  THR A  55      19.360  18.475  15.745  1.00  0.00           C  
ATOM    215  C   THR A  55      18.996  19.058  17.109  1.00  0.00           C  
ATOM    216  O   THR A  55      18.829  18.354  18.103  1.00  0.00           O  
ATOM    217  N   LEU A  56      18.828  20.384  17.182  1.00  0.00           N  
ATOM    218  CA  LEU A  56      18.381  21.015  18.405  1.00  0.00           C  
ATOM    219  C   LEU A  56      17.066  20.469  18.978  1.00  0.00           C  
ATOM    220  O   LEU A  56      17.015  20.274  20.190  1.00  0.00           O  
ATOM    221  N   SER A  57      16.116  20.081  18.126  1.00  0.00           N  
ATOM    222  CA  SER A  57      14.856  19.436  18.409  1.00  0.00           C  
ATOM    223  C   SER A  57      15.100  18.131  19.158  1.00  0.00           C  
ATOM    224  O   SER A  57      14.414  17.844  20.138  1.00  0.00           O  
ATOM    225  N   ASP A  58      16.043  17.283  18.733  1.00  0.00           N  
ATOM    226  CA  ASP A  58      16.275  16.007  19.382  1.00  0.00           C  
ATOM    227  C   ASP A  58      16.665  16.113  20.857  1.00  0.00           C  
ATOM    228  O   ASP A  58      16.328  15.273  21.684  1.00  0.00           O  
ATOM    229  N   TYR A  59      17.453  17.148  21.107  1.00  0.00           N  
ATOM    230  CA  TYR A  59      17.937  17.597  22.394  1.00  0.00           C  
ATOM    231  C   TYR A  59      17.037  18.620  23.106  1.00  0.00           C  
ATOM    232  O   TYR A  59      17.561  19.209  24.044  1.00  0.00           O  
ATOM    233  N   ASN A  60      15.790  18.797  22.693  1.00  0.00           N  
ATOM    234  CA  ASN A  60      14.619  19.375  23.316  1.00  0.00           C  
ATOM    235  C   ASN A  60      14.771  20.896  23.422  1.00  0.00           C  
ATOM    236  O   ASN A  60      13.986  21.546  24.117  1.00  0.00           O  
ATOM    237  N   ILE A  61      15.752  21.515  22.790  1.00  0.00           N  
ATOM    238  CA  ILE A  61      16.175  22.904  22.700  1.00  0.00           C  
ATOM    239  C   ILE A  61      14.998  23.788  22.288  1.00  0.00           C  
ATOM    240  O   ILE A  61      14.210  23.506  21.384  1.00  0.00           O  
ATOM    241  N   GLN A  62      14.816  24.923  22.959  1.00  0.00           N  
ATOM    242  CA  GLN A  62      13.642  25.758  23.106  1.00  0.00           C  
ATOM    243  C   GLN A  62      14.019  27.243  23.178  1.00  0.00           C  
ATOM    244  O   GLN A  62      15.171  27.658  23.258  1.00  0.00           O  
ATOM    245  N   LYS A  63      12.948  28.015  23.366  1.00  0.00           N  
ATOM    246  CA  LYS A  63      12.861  29.428  23.669  1.00  0.00           C  
ATOM    247  C   LYS A  63      13.707  29.868  24.865  1.00  0.00           C  
ATOM    248  O   LYS A  63      13.427  29.664  26.047  1.00  0.00           O  
ATOM    249  N   GLU A  64      14.827  30.531  24.591  1.00  0.00           N  
ATOM    250  CA  GLU A  64      15.833  31.017  25.514  1.00  0.00           C  
ATOM    251  C   GLU A  64      16.670  29.905  26.147  1.00  0.00           C  
ATOM    252  O   GLU A  64      17.267  30.159  27.186  1.00  0.00           O  
ATOM    253  N   SER A  65      16.782  28.701  25.586  1.00  0.00           N  
ATOM    254  CA  SER A  65      17.652  27.619  26.013  1.00  0.00           C  
ATOM    255  C   SER A  65      19.083  28.154  25.978  1.00  0.00           C  
ATOM    256  O   SER A  65      19.547  28.613  24.933  1.00  0.00           O  
ATOM    257  N   THR A  66      19.762  28.158  27.119  1.00  0.00           N  
ATOM    258  CA  THR A  66      21.132  28.574  27.377  1.00  0.00           C  
ATOM    259  C   THR A  66      22.024  27.339  27.261  1.00  0.00           C  
ATOM    260  O   THR A  66      21.821  26.348  27.961  1.00  0.00           O  
ATOM    261  N   LEU A  67      22.991  27.456  26.361  1.00  0.00           N  
ATOM    262  CA  LEU A  67      23.989  26.451  26.070  1.00  0.00           C  
ATOM    263  C   LEU A  67      25.363  26.975  26.487  1.00  0.00           C  
ATOM    264  O   LEU A  67      25.524  28.176  26.712  1.00  0.00           O  
ATOM    265  N   HIS A  68      26.409  26.157  26.481  1.00  0.00           N  
ATOM    266  CA  HIS A  68      27.742  26.435  26.983  1.00  0.00           C  
ATOM    267  C   HIS A  68      28.818  25.935  26.005  1.00  0.00           C  
ATOM    268  O   HIS A  68      28.607  24.938  25.315  1.00  0.00           O  
ATOM    269  N   LEU A  69      29.920  26.670  25.895  1.00  0.00           N  
ATOM    270  CA  LEU A  69      30.809  26.557  24.758  1.00  0.00           C  
ATOM    271  C   LEU A  69      32.222  26.313  25.287  1.00  0.00           C  
ATOM    272  O   LEU A  69      32.864  27.261  25.741  1.00  0.00           O  
ATOM    273  N   VAL A  70      32.710  25.082  25.222  1.00  0.00           N  
ATOM    274  CA  VAL A  70      34.089  24.741  25.528  1.00  0.00           C  
ATOM    275  C   VAL A  70      34.952  24.893  24.275  1.00  0.00           C  
ATOM    276  O   VAL A  70      34.713  24.366  23.186  1.00  0.00           O  
TER
ENDMDL
MODEL      2
ATOM      1  N   GLN A   2      15.030  31.890  18.890  1.00  0.00           N  
ATOM      2  CA  GLN A   2      16.250  32.370  19.500  1.00  0.00           C  
ATOM      3  C   GLN A   2      16.770  31.310  20.480  1.00  0.00           C  
ATOM      4  O   GLN A   2      16.040  30.760  21.290  1.00  0.00           O  
ATOM      5  N   ILE A   3      18.070  31.040  20.390  1.00  0.00           N  
ATOM      6  CA  ILE A   3      18.830  30.390  21.450  1.00  0.00           C  
ATOM      7  C   ILE A   3      20.100  31.190  21.760  1.00  0.00           C  
ATOM      8  O   ILE A   3      20.460  32.040  20.950  1.00  0.00           O  
ATOM      9  N   PHE A   4      20.790  30.880  22.860  1.00  0.00           N  
ATOM     10  CA  PHE A   4      21.910  31.650  23.350  1.00  0.00           C  
ATOM     11  C   PHE A   4      23.130  30.800  23.710  1.00  0.00           C  
ATOM     12  O   PHE A   4      22.940  29.650  24.110  1.00  0.00           O  
ATOM     13  N   VAL A   5      24.360  31.280  23.530  1.00  0.00           N  
ATOM     14  CA  VAL A   5      25.560  30.470  23.460  1.00  0.00           C  
ATOM     15  C   VAL A   5      26.440  31.280  24.410  1.00  0.00           C  
ATOM     16  O   VAL A   5      27.070  32.230  23.940  1.00  0.00           O  
ATOM     17  N   LYS A   6      26.490  30.900  25.680  1.00  0.00           N  
ATOM     18  CA  LYS A   6      27.410  31.410  26.680  1.00  0.00           C  
ATOM     19  C   LYS A   6      28.800  30.790  26.510  1.00  0.00           C  
ATOM     20  O   LYS A   6      29.020  29.590  26.350  1.00  0.00           O  
ATOM     21  N   THR A   7      29.800  31.650  26.650  1.00  0.00           N  
ATOM     22  CA  THR A   7      31.200  31.290  26.570  1.00  0.00           C  
ATOM     23  C   THR A   7      31.670  31.040  28.000  1.00  0.00           C  
ATOM     24  O   THR A   7      31.080  31.430  29.000  1.00  0.00           O  
ATOM     25  N   LEU A   8      32.860  30.470  28.150  1.00  0.00           N  
ATOM     26  CA  LEU A   8      33.670  30.420  29.360  1.00  0.00           C  
ATOM     27  C   LEU A   8      34.250  31.790  29.690  1.00  0.00           C  
ATOM     28  O   LEU A   8      34.630  31.990  30.850  1.00  0.00           O  
ATOM     29  N   THR A   9      34.250  32.710  28.730  1.00  0.00           N  
ATOM     30  CA  THR A   9      34.730  34.060  28.980  1.00  0.00           C  
ATOM     31  C   THR A   9      33.630  35.020  29.430  1.00  0.00           C  
ATOM     32  O   THR A   9      34.010  36.040  29.980  1.00  0.00           O  
ATOM     33  N   GLY A  10      32.370  34.600  29.410  1.00  0.00           N  
ATOM     34  CA  GLY A  10      31.270  35.210  30.130  1.00  0.00           C  
ATOM     35  C   GLY A  10      30.170  35.830  29.270  1.00  0.00           C  
ATOM     36  O   GLY A  10      29.090  36.100  29.790  1.00  0.00           O  
ATOM     37  N   LYS A  11      30.530  36.060  28.010  1.00  0.00           N  
ATOM     38  CA  LYS A  11      29.740  36.680  26.970  1.00  0.00           C  
ATOM     39  C   LYS A  11      28.730  35.640  26.470  1.00  0.00           C  
ATOM     40  O   LYS A  11      29.090  34.470  26.400  1.00  0.00           O  
ATOM     41  N   THR A  12      27.520  36.020  26.080  1.00  0.00           N  
ATOM     42  CA  THR A  12      26.490  35.230  25.440  1.00  0.00           C  
ATOM     43  C   THR A  12      26.410  35.620  23.960  1.00  0.00           C  
ATOM     44  O   THR A  12      26.250  36.800  23.640  1.00  0.00           O  
ATOM     45  N   ILE A  13      26.590  34.700  23.020  1.00  0.00           N  
ATOM     46  CA  ILE A  13      26.400  34.950  21.600  1.00  0.00           C  
ATOM     47  C   ILE A  13      24.920  34.620  21.410  1.00  0.00           C  
ATOM     48  O   ILE A  13      24.380  33.750  22.080  1.00  0.00           O  
ATOM     49  N   THR A  14      24.210  35.300  20.510  1.00  0.00           N  
ATOM     50  CA  THR A  14      22.830  34.900  20.280  1.00  0.00           C  
ATOM     51  C   THR A  14      22.700  34.250  18.900  1.00  0.00           C  
ATOM     52  O   THR A  14      23.320  34.690  17.930  1.00  0.00           O  
ATOM     53  N   LEU A  15      21.930  33.160  18.890  1.00  0.00           N  
ATOM     54  CA  LEU A  15      21.950  32.140  17.870  1.00  0.00           C  
ATOM     55  C   LEU A  15      20.520  32.050  17.320  1.00  0.00           C  
ATOM     56  O   LEU A  15      19.590  31.540  17.930  1.00  0.00           O  
ATOM     57  N   GLU A  16      20.270  32.670  16.170  1.00  0.00           N  
ATOM     58  CA  GLU A  16      19.030  32.870  15.450  1.00  0.00           C  
ATOM     59  C   GLU A  16      18.770  31.660  14.550  1.00  0.00           C  
ATOM     60  O   GLU A  16      19.570  31.470  13.640  1.00  0.00           O  
ATOM     61  N   VAL A  17      17.830  30.770  14.860  1.00  0.00           N  
ATOM     62  CA  VAL A  17      17.790  29.430  14.310  1.00  0.00           C  
ATOM     63  C   VAL A  17      16.400  28.810  14.400  1.00  0.00           C  
ATOM     64  O   VAL A  17      15.520  29.230  15.160  1.00  0.00           O  
ATOM     65  N   GLU A  18      16.120  27.780  13.620  1.00  0.00           N  
ATOM     66  CA  GLU A  18      14.880  27.020  13.620  1.00  0.00           C  
ATOM     67  C   GLU A  18      15.040  25.750  14.460  1.00  0.00           C  
ATOM     68  O   GLU A  18      16.170  25.290  14.570  1.00  0.00           O  
ATOM     69  N   PRO A  19      14.020  25.150  15.070  1.00  0.00           N  
ATOM     70  CA  PRO A  19      14.140  23.820  15.620  1.00  0.00           C  
ATOM     71  C   PRO A  19      14.680  22.690  14.740  1.00  0.00           C  
ATOM     72  O   PRO A  19      15.180  21.720  15.310  1.00  0.00           O  
ATOM     73  N   SER A  20      14.460  22.740  13.430  1.00  0.00           N  
ATOM     74  CA  SER A  20      14.940  21.810  12.430  1.00  0.00           C  
ATOM     75  C   SER A  20      16.320  22.200  11.900  1.00  0.00           C  
ATOM     76  O   SER A  20      16.810  21.460  11.060  1.00  0.00           O  
ATOM     77  N   ASP A  21      16.950  23.260  12.400  1.00  0.00           N  
ATOM     78  CA  ASP A  21      18.350  23.540  12.160  1.00  0.00           C  
ATOM     79  C   ASP A  21      19.210  22.700  13.120  1.00  0.00           C  
ATOM     80  O   ASP A  21      18.800  22.320  14.210  1.00  0.00           O  
ATOM     81  N   THR A  22      20.330  22.190  12.620  1.00  0.00           N  
ATOM     82  CA  THR A  22      21.260  21.280  13.260  1.00  0.00           C  
ATOM     83  C   THR A  22      22.180  22.060  14.190  1.00  0.00           C  
ATOM     84  O   THR A  22      22.480  23.220  13.900  1.00  0.00           O  
ATOM     85  N   ILE A  23      22.800  21.390  15.150  1.00  0.00           N  
ATOM     86  CA  ILE A  23      23.850  21.900  16.010  1.00  0.00           C  
ATOM     87  C   ILE A  23      25.200  22.100  15.330  1.00  0.00           C  
ATOM     88  O   ILE A  23      26.030  22.780  15.930  1.00  0.00           O  
ATOM     89  N   GLU A  24      25.400  21.540  14.130  1.00  0.00           N  
ATOM     90  CA  GLU A  24      26.570  21.870  13.350  1.00  0.00           C  
ATOM     91  C   GLU A  24      26.490  23.090  12.430  1.00  0.00           C  
ATOM     92  O   GLU A  24      27.490  23.740  12.120  1.00  0.00           O  
ATOM     93  N   ASN A  25      25.230  23.440  12.190  1.00  0.00           N  
ATOM     94  CA  ASN A  25      24.820  24.700  11.610  1.00  0.00           C  
ATOM     95  C   ASN A  25      25.170  25.780  12.630  1.00  0.00           C  
ATOM     96  O   ASN A  25      25.830  26.740  12.240  1.00  0.00           O  
ATOM     97  N   VAL A  26      24.870  25.600  13.920  1.00  0.00           N  
ATOM     98  CA  VAL A  26      25.220  26.340  15.110  1.00  0.00           C  
ATOM     99  C   VAL A  26      26.740  26.420  15.210  1.00  0.00           C  
ATOM    100  O   VAL A  26      27.240  27.520  15.420  1.00  0.00           O  
ATOM    101  N   LYS A  27      27.490  25.360  14.910  1.00  0.00           N  
ATOM    102  CA  LYS A  27      28.930  25.540  15.000  1.00  0.00           C  
ATOM    103  C   LYS A  27      29.430  26.390  13.830  1.00  0.00           C  
ATOM    104  O   LYS A  27      30.430  27.070  14.030  1.00  0.00           O  
ATOM    105  N   ALA A  28      28.910  26.230  12.620  1.00  0.00           N  
ATOM    106  CA  ALA A  28      29.210  27.100  11.500  1.00  0.00           C  
ATOM    107  C   ALA A  28      28.730  28.550  11.580  1.00  0.00           C  
ATOM    108  O   ALA A  28      29.420  29.450  11.110  1.00  0.00           O  
ATOM    109  N   LYS A  29      27.600  28.730  12.260  1.00  0.00           N  
ATOM    110  CA  LYS A  29      27.180  30.030  12.750  1.00  0.00           C  
ATOM    111  C   LYS A  29      28.210  30.680  13.670  1.00  0.00           C  
ATOM    112  O   LYS A  29      28.480  31.870  13.530  1.00  0.00           O  
ATOM    113  N   ILE A  30      28.820  29.990  14.630  1.00  0.00           N  
ATOM    114  CA  ILE A  30      29.760  30.480  15.620  1.00  0.00           C  
ATOM    115  C   ILE A  30      30.990  31.190  15.040  1.00  0.00           C  
ATOM    116  O   ILE A  30      31.320  32.270  15.520  1.00  0.00           O  
ATOM    117  N   GLN A  31      31.520  30.520  14.020  1.00  0.00           N  
ATOM    118  CA  GLN A  31      32.590  31.000  13.150  1.00  0.00           C  
ATOM    119  C   GLN A  31      32.360  32.410  12.610  1.00  0.00           C  
ATOM    120  O   GLN A  31      33.010  33.360  13.040  1.00  0.00           O  
ATOM    121  N   ASP A  32      31.340  32.530  11.760  1.00  0.00           N  
ATOM    122  CA  ASP A  32      30.820  33.760  11.200  1.00  0.00           C  
ATOM    123  C   ASP A  32      30.500  34.900  12.160  1.00  0.00           C  
ATOM    124  O   ASP A  32      30.920  36.000  11.820  1.00  0.00           O  
ATOM    125  N   LYS A  33      30.080  34.610  13.390  1.00  0.00           N  
ATOM    126  CA  LYS A  33      29.820  35.640  14.370  1.00  0.00           C  
ATOM    127  C   LYS A  33      31.120  35.970  15.110  1.00  0.00           C  
ATOM    128  O   LYS A  33      31.580  37.100  15.000  1.00  0.00           O  
ATOM    129  N   GLU A  34      31.750  34.980  15.760  1.00  0.00           N  
ATOM    130  CA  GLU A  34      32.820  35.030  16.730  1.00  0.00           C  
ATOM    131  C   GLU A  34      34.210  34.490  16.400  1.00  0.00           C  
ATOM    132  O   GLU A  34      35.130  34.680  17.200  1.00  0.00           O  
ATOM    133  N   GLY A  35      34.420  33.810  15.280  1.00  0.00           N  
ATOM    134  CA  GLY A  35      35.730  33.590  14.710  1.00  0.00           C  
ATOM    135  C   GLY A  35      36.260  32.190  15.030  1.00  0.00           C  
ATOM    136  O   GLY A  35      37.430  31.950  14.730  1.00  0.00           O  
ATOM    137  N   ILE A  36      35.470  31.380  15.740  1.00  0.00           N  
ATOM    138  CA  ILE A  36      35.860  30.090  16.280  1.00  0.00           C  
ATOM    139  C   ILE A  36      35.380  28.970  15.360  1.00  0.00           C  
ATOM    140  O   ILE A  36      34.170  28.780  15.270  1.00  0.00           O  
ATOM    141  N   PRO A  37      36.250  28.260  14.660  1.00  0.00           N  
ATOM    142  CA  PRO A  37      35.910  27.070  13.890  1.00  0.00           C  
ATOM    143  C   PRO A  37      35.240  25.910  14.620  1.00  0.00           C  
ATOM    144  O   PRO A  37      35.670  25.820  15.770  1.00  0.00           O  
ATOM    145  N   PRO A  38      34.300  25.200  14.010  1.00  0.00           N  
ATOM    146  CA  PRO A  38      33.600  24.100  14.650  1.00  0.00           C  
ATOM    147  C   PRO A  38      34.390  23.070  15.450  1.00  0.00           C  
ATOM    148  O   PRO A  38      33.880  22.590  16.460  1.00  0.00           O  
ATOM    149  N   ASP A  39      35.640  22.770  15.100  1.00  0.00           N  
ATOM    150  CA  ASP A  39      36.440  21.790  15.810  1.00  0.00           C  
ATOM    151  C   ASP A  39      36.890  22.230  17.210  1.00  0.00           C  
ATOM    152  O   ASP A  39      37.110  21.420  18.100  1.00  0.00           O  
ATOM    153  N   GLN A  40      37.160  23.530  17.300  1.00  0.00           N  
ATOM    154  CA  GLN A  40      37.650  24.150  18.510  1.00  0.00           C  
ATOM    155  C   GLN A  40      36.530  24.660  19.430  1.00  0.00           C  
ATOM    156  O   GLN A  40      36.770  25.540  20.250  1.00  0.00           O  
ATOM    157  N   GLN A  41      35.310  24.220  19.130  1.00  0.00           N  
ATOM    158  CA  GLN A  41      34.190  24.500  20.010  1.00  0.00           C  
ATOM    159  C   GLN A  41      33.890  23.170  20.710  1.00  0.00           C  
ATOM    160  O   GLN A  41      34.140  22.100  20.170  1.00  0.00           O  
ATOM    161  N   ARG A  42      33.260  23.190  21.870  1.00  0.00           N  
ATOM    162  CA  ARG A  42      32.360  22.180  22.400  1.00  0.00           C  
ATOM    163  C   ARG A  42      31.140  22.800  23.090  1.00  0.00           C  
ATOM    164  O   ARG A  42      31.350  23.540  24.050  1.00  0.00           O  
ATOM    165  N   LEU A  43      29.940  22.560  22.570  1.00  0.00           N  
ATOM    166  CA  LEU A  43      28.620  23.020  22.960  1.00  0.00           C  
ATOM    167  C   LEU A  43      28.000  21.880  23.770  1.00  0.00           C  
ATOM    168  O   LEU A  43      27.640  20.860  23.190  1.00  0.00           O  
ATOM    169  N   ILE A  44      27.870  22.000  25.090  1.00  0.00           N  
ATOM    170  CA  ILE A  44      27.140  21.160  26.020  1.00  0.00           C  
ATOM    171  C   ILE A  44      25.930  21.920  26.550  1.00  0.00           C  
ATOM    172  O   ILE A  44      26.030  23.140  26.630  1.00  0.00           O  
ATOM    173  N   PHE A  45      24.930  21.200  27.040  1.00  0.00           N  
ATOM    174  CA  PHE A  45      23.850  21.580  27.920  1.00  0.00           C  
ATOM    175  C   PHE A  45      23.990  20.810  29.240  1.00  0.00           C  
ATOM    176  O   PHE A  45      23.220  20.970  30.180  1.00  0.00           O  
ATOM    177  N   ALA A  46      25.000  19.960  29.370  1.00  0.00           N  
ATOM    178  CA  ALA A  46      25.350  19.200  30.550  1.00  0.00           C  
ATOM    179  C   ALA A  46      26.860  19.050  30.790  1.00  0.00           C  
ATOM    180  O   ALA A  46      27.470  20.050  31.150  1.00  0.00           O  
ATOM    181  N   GLY A  47      27.490  17.890  30.660  1.00  0.00           N  
ATOM    182  CA  GLY A  47      28.920  17.740  30.850  1.00  0.00           C  
ATOM    183  C   GLY A  47      29.570  17.150  29.600  1.00  0.00           C  
ATOM    184  O   GLY A  47      30.780  17.310  29.440  1.00  0.00           O  
ATOM    185  N   LYS A  48      28.720  16.520  28.790  1.00  0.00           N  
ATOM    186  CA  LYS A  48      29.070  15.970  27.500  1.00  0.00           C  
ATOM    187  C   LYS A  48      28.300  16.640  26.350  1.00  0.00           C  
ATOM    188  O   LYS A  48      27.390  17.400  26.660  1.00  0.00           O  
ATOM    189  N   GLN A  49      28.870  16.610  25.150  1.00  0.00           N  
ATOM    190  CA  GLN A  49      28.350  17.320  24.010  1.00  0.00           C  
ATOM    191  C   GLN A  49      26.980  16.730  23.640  1.00  0.00           C  
ATOM    192  O   GLN A  49      26.560  15.700  24.160  1.00  0.00           O  
ATOM    193  N   LEU A  50      26.320  17.540  22.810  1.00  0.00           N  
ATOM    194  CA  LEU A  50      25.170  17.230  21.990  1.00  0.00           C  
ATOM    195  C   LEU A  50      25.700  16.890  20.600  1.00  0.00           C  
ATOM    196  O   LEU A  50      26.340  17.750  20.010  1.00  0.00           O  
ATOM    197  N   GLU A  51      25.320  15.750  20.020  1.00  0.00           N  
ATOM    198  CA  GLU A  51      25.830  15.360  18.720  1.00  0.00           C  
ATOM    199  C   GLU A  51      25.350  16.210  17.540  1.00  0.00           C  
ATOM    200  O   GLU A  51      24.140  16.380  17.450  1.00  0.00           O  
ATOM    201  N   ASP A  52      26.320  16.730  16.800  1.00  0.00           N  
ATOM    202  CA  ASP A  52      26.220  17.720  15.740  1.00  0.00           C  
ATOM    203  C   ASP A  52      25.130  17.530  14.690  1.00  0.00           C  
ATOM    204  O   ASP A  52      24.580  18.510  14.190  1.00  0.00           O  
ATOM    205  N   GLY A  53      24.790  16.260  14.480  1.00  0.00           N  
ATOM    206  CA  GLY A  53      23.960  15.790  13.390  1.00  0.00           C  
ATOM    207  C   GLY A  53      22.490  15.510  13.720  1.00  0.00           C  
ATOM    208  O   GLY A  53      21.740  15.140  12.820  1.00  0.00           O  
ATOM    209  N   ARG A  54      22.080  15.940  14.910  1.00  0.00           N  
ATOM    210  CA  ARG A  54      20.710  16.010  15.360  1.00  0.00           C  
ATOM    211  C   ARG A  54      20.340  17.490  15.480  1.00  0.00           C  
ATOM    212  O   ARG A  54      21.230  18.330  15.450  1.00  0.00           O  
ATOM    213  N   THR A  55      19.110  17.810  15.880  1.00  0.00           N  
ATOM    214  CA  THR A  55      18.630  19.180  15.820  1.00  0.00           C  
ATOM    215  C   THR A  55      18.280  19.530  17.270  1.00  0.00           C  
ATOM    216  O   THR A  55      18.040  18.620  18.060  1.00  0.00           O  
ATOM    217  N   LEU A  56      17.980  20.820  17.410  1.00  0.00           N  
ATOM    218  CA  LEU A  56      17.200  21.510  18.420  1.00  0.00           C  
ATOM    219  C   LEU A  56      15.970  20.690  18.790  1.00  0.00           C  
ATOM    220  O   LEU A  56      15.820  20.370  19.970  1.00  0.00           O  
ATOM    221  N   SER A  57      15.170  20.250  17.820  1.00  0.00           N  
ATOM    222  CA  SER A  57      13.950  19.490  17.980  1.00  0.00           C  
ATOM    223  C   SER A  57      14.130  18.110  18.620  1.00  0.00           C  
ATOM    224  O   SER A  57      13.300  17.720  19.440  1.00  0.00           O  
ATOM    225  N   ASP A  58      15.220  17.420  18.280  1.00  0.00           N  
ATOM    226  CA  ASP A  58      15.400  16.090  18.810  1.00  0.00           C  
ATOM    227  C   ASP A  58      15.680  16.190  20.310  1.00  0.00           C  
ATOM    228  O   ASP A  58      15.190  15.410  21.120  1.00  0.00           O  
ATOM    229  N   TYR A  59      16.590  17.120  20.610  1.00  0.00           N  
ATOM    230  CA  TYR A  59      17.120  17.360  21.940  1.00  0.00           C  
ATOM    231  C   TYR A  59      16.210  18.170  22.850  1.00  0.00           C  
ATOM    232  O   TYR A  59      16.430  18.450  24.030  1.00  0.00           O  
ATOM    233  N   ASN A  60      15.100  18.650  22.290  1.00  0.00           N  
ATOM    234  CA  ASN A  60      14.150  19.490  22.980  1.00  0.00           C  
ATOM    235  C   ASN A  60      14.700  20.800  23.540  1.00  0.00           C  
ATOM    236  O   ASN A  60      14.480  21.150  24.700  1.00  0.00           O  
ATOM    237  N   ILE A  61      15.500  21.470  22.710  1.00  0.00           N  
ATOM    238  CA  ILE A  61      16.080  22.770  22.980  1.00  0.00           C  
ATOM    239  C   ILE A  61      15.080  23.780  22.420  1.00  0.00           C  
ATOM    240  O   ILE A  61      15.080  24.160  21.250  1.00  0.00           O  
ATOM    241  N   GLN A  62      14.260  24.300  23.330  1.00  0.00           N  
ATOM    242  CA  GLN A  62      13.220  25.290  23.140  1.00  0.00           C  
ATOM    243  C   GLN A  62      13.850  26.680  23.030  1.00  0.00           C  
ATOM    244  O   GLN A  62      14.960  26.910  23.520  1.00  0.00           O  
ATOM    245  N   LYS A  63      13.060  27.650  22.580  1.00  0.00           N  
ATOM    246  CA  LYS A  63      13.360  29.060  22.630  1.00  0.00           C  
ATOM    247  C   LYS A  63      14.050  29.540  23.910  1.00  0.00           C  
ATOM    248  O   LYS A  63      13.600  29.260  25.020  1.00  0.00           O  
ATOM    249  N   GLU A  64      15.150  30.280  23.810  1.00  0.00           N  
ATOM    250  CA  GLU A  64      15.800  31.040  24.860  1.00  0.00           C  
ATOM    251  C   GLU A  64      16.490  30.160  25.910  1.00  0.00           C  
ATOM    252  O   GLU A  64      16.450  30.430  27.110  1.00  0.00           O  
ATOM    253  N   SER A  65      17.110  29.080  25.450  1.00  0.00           N  
ATOM    254  CA  SER A  65      17.950  28.110  26.130  1.00  0.00           C  
ATOM    255  C   SER A  65      19.400  28.560  26.010  1.00  0.00           C  
ATOM    256  O   SER A  65      19.850  28.950  24.930  1.00  0.00           O  
ATOM    257  N   THR A  66      20.020  28.550  27.190  1.00  0.00           N  
ATOM    258  CA  THR A  66      21.420  28.880  27.280  1.00  0.00           C  
ATOM    259  C   THR A  66      22.250  27.610  27.080  1.00  0.00           C  
ATOM    260  O   THR A  66      22.320  26.800  28.000  1.00  0.00           O  
ATOM    261  N   LEU A  67      22.980  27.520  25.970  1.00  0.00           N  
ATOM    262  CA  LEU A  67      23.960  26.480  25.700  1.00  0.00           C  
ATOM    263  C   LEU A  67      25.340  26.990  26.110  1.00  0.00           C  
ATOM    264  O   LEU A  67      25.640  28.170  25.960  1.00  0.00           O  
ATOM    265  N   HIS A  68      26.150  26.170  26.780  1.00  0.00           N  
ATOM    266  CA  HIS A  68      27.490  26.540  27.190  1.00  0.00           C  
ATOM    267  C   HIS A  68      28.520  26.060  26.160  1.00  0.00           C  
ATOM    268  O   HIS A  68      28.520  24.890  25.780  1.00  0.00           O  
ATOM    269  N   LEU A  69      29.330  27.000  25.680  1.00  0.00           N  
ATOM    270  CA  LEU A  69      30.400  26.800  24.730  1.00  0.00           C  
ATOM    271  C   LEU A  69      31.720  26.770  25.500  1.00  0.00           C  
ATOM    272  O   LEU A  69      32.130  27.790  26.060  1.00  0.00           O  
ATOM    273  N   VAL A  70      32.310  25.580  25.580  1.00  0.00           N  
ATOM    274  CA  VAL A  70      33.740  25.460  25.740  1.00  0.00           C  
ATOM    275  C   VAL A  70      34.430  25.710  24.390  1.00  0.00           C  
ATOM    276  O   VAL A  70      33.920  25.430  23.310  1.00  0.00           O  
TER
ENDMDL
MODEL      3
ATOM      1  N   GLN A   2      14.675  31.630  19.679  1.00  0.00           N  
ATOM      2  CA  GLN A   2      15.743  32.126  20.527  1.00  0.00           C  
ATOM      3  C   GLN A   2      16.357  31.076  21.452  1.00  0.00           C  
ATOM      4  O   GLN A   2      15.595  30.361  22.102  1.00  0.00           O  
ATOM      5  N   ILE A   3      17.679  31.056  21.509  1.00  0.00           N  
ATOM      6  CA  ILE A   3      18.577  30.276  22.347  1.00  0.00           C  
ATOM      7  C   ILE A   3      19.631  31.318  22.758  1.00  0.00           C  
ATOM      8  O   ILE A   3      19.872  32.298  22.059  1.00  0.00           O  
ATOM      9  N   PHE A   4      20.312  30.912  23.827  1.00  0.00           N  
ATOM     10  CA  PHE A   4      21.521  31.518  24.348  1.00  0.00           C  
ATOM     11  C   PHE A   4      22.775  30.653  24.225  1.00  0.00           C  
ATOM     12  O   PHE A   4      22.649  29.424  24.244  1.00  0.00           O  
ATOM     13  N   VAL A   5      23.901  31.315  23.971  1.00  0.00           N  
ATOM     14  CA  VAL A   5      25.163  30.587  23.981  1.00  0.00           C  
ATOM     15  C   VAL A   5      26.163  31.388  24.802  1.00  0.00           C  
ATOM     16  O   VAL A   5      26.568  32.491  24.426  1.00  0.00           O  
ATOM     17  N   LYS A   6      26.502  30.767  25.934  1.00  0.00           N  
ATOM     18  CA  LYS A   6      27.449  31.206  26.935  1.00  0.00           C  
ATOM     19  C   LYS A   6      28.842  31.027  26.322  1.00  0.00           C  
ATOM     20  O   LYS A   6      29.123  29.861  26.044  1.00  0.00           O  
ATOM     21  N   THR A   7      29.720  32.021  26.242  1.00  0.00           N  
ATOM     22  CA  THR A   7      31.128  31.685  26.166  1.00  0.00           C  
ATOM     23  C   THR A   7      31.835  31.577  27.523  1.00  0.00           C  
ATOM     24  O   THR A   7      31.310  32.208  28.430  1.00  0.00           O  
ATOM     25  N   LEU A   8      33.008  30.954  27.599  1.00  0.00           N  
ATOM     26  CA  LEU A   8      33.782  30.989  28.822  1.00  0.00           C  
ATOM     27  C   LEU A   8      34.493  32.344  28.958  1.00  0.00           C  
ATOM     28  O   LEU A   8      34.979  32.696  30.026  1.00  0.00           O  
ATOM     29  N   THR A   9      34.534  33.158  27.909  1.00  0.00           N  
ATOM     30  CA  THR A   9      35.105  34.481  27.782  1.00  0.00           C  
ATOM     31  C   THR A   9      34.198  35.559  28.369  1.00  0.00           C  
ATOM     32  O   THR A   9      34.623  36.708  28.534  1.00  0.00           O  
ATOM     33  N   GLY A  10      32.950  35.298  28.736  1.00  0.00           N  
ATOM     34  CA  GLY A  10      32.110  36.270  29.404  1.00  0.00           C  
ATOM     35  C   GLY A  10      31.053  36.923  28.496  1.00  0.00           C  
ATOM     36  O   GLY A  10      30.381  37.888  28.842  1.00  0.00           O  
ATOM     37  N   LYS A  11      30.929  36.350  27.298  1.00  0.00           N  
ATOM     38  CA  LYS A  11      30.086  36.880  26.247  1.00  0.00           C  
ATOM     39  C   LYS A  11      28.841  35.984  26.196  1.00  0.00           C  
ATOM     40  O   LYS A  11      29.005  34.786  26.406  1.00  0.00           O  
ATOM     41  N   THR A  12      27.621  36.456  25.992  1.00  0.00           N  
ATOM     42  CA  THR A  12      26.371  35.730  25.872  1.00  0.00           C  
ATOM     43  C   THR A  12      25.943  36.001  24.431  1.00  0.00           C  
ATOM     44  O   THR A  12      25.406  37.080  24.196  1.00  0.00           O  
ATOM     45  N   ILE A  13      26.158  35.062  23.514  1.00  0.00           N  
ATOM     46  CA  ILE A  13      25.826  35.163  22.104  1.00  0.00           C  
ATOM     47  C   ILE A  13      24.332  34.826  22.081  1.00  0.00           C  
ATOM     48  O   ILE A  13      23.968  33.767  22.576  1.00  0.00           O  
ATOM     49  N   THR A  14      23.441  35.664  21.561  1.00  0.00           N  
ATOM     50  CA  THR A  14      22.027  35.412  21.382  1.00  0.00           C  
ATOM     51  C   THR A  14      21.790  35.147  19.888  1.00  0.00           C  
ATOM     52  O   THR A  14      22.089  36.033  19.089  1.00  0.00           O  
ATOM     53  N   LEU A  15      21.209  34.001  19.551  1.00  0.00           N  
ATOM     54  CA  LEU A  15      20.881  33.520  18.222  1.00  0.00           C  
ATOM     55  C   LEU A  15      19.409  33.130  18.107  1.00  0.00           C  
ATOM     56  O   LEU A  15      18.983  32.367  18.979  1.00  0.00           O  
ATOM     57  N   GLU A  16      18.793  33.653  17.054  1.00  0.00           N  
ATOM     58  CA  GLU A  16      17.624  33.086  16.399  1.00  0.00           C  
ATOM     59  C   GLU A  16      18.039  31.842  15.627  1.00  0.00           C  
ATOM     60  O   GLU A  16      18.859  31.969  14.720  1.00  0.00           O  
ATOM     61  N   VAL A  17      17.572  30.634  15.937  1.00  0.00           N  
ATOM     62  CA  VAL A  17      17.732  29.396  15.214  1.00  0.00           C  
ATOM     63  C   VAL A  17      16.481  28.919  14.474  1.00  0.00           C  
ATOM     64  O   VAL A  17      15.448  29.450  14.874  1.00  0.00           O  
ATOM     65  N   GLU A  18      16.451  27.882  13.639  1.00  0.00           N  
ATOM     66  CA  GLU A  18      15.287  27.130  13.225  1.00  0.00           C  
ATOM     67  C   GLU A  18      15.259  25.900  14.135  1.00  0.00           C  
ATOM     68  O   GLU A  18      16.338  25.348  14.325  1.00  0.00           O  
ATOM     69  N   PRO A  19      14.189  25.284  14.622  1.00  0.00           N  
ATOM     70  CA  PRO A  19      14.197  23.949  15.186  1.00  0.00           C  
ATOM     71  C   PRO A  19      14.812  22.862  14.298  1.00  0.00           C  
ATOM     72  O   PRO A  19      15.412  21.984  14.920  1.00  0.00           O  
ATOM     73  N   SER A  20      14.754  23.024  12.979  1.00  0.00           N  
ATOM     74  CA  SER A  20      15.308  22.076  12.033  1.00  0.00           C  
ATOM     75  C   SER A  20      16.807  22.179  11.777  1.00  0.00           C  
ATOM     76  O   SER A  20      17.361  21.341  11.072  1.00  0.00           O  
ATOM     77  N   ASP A  21      17.456  23.072  12.520  1.00  0.00           N  
ATOM     78  CA  ASP A  21      18.896  23.275  12.496  1.00  0.00           C  
ATOM     79  C   ASP A  21      19.564  22.060  13.153  1.00  0.00           C  
ATOM     80  O   ASP A  21      18.993  21.406  14.024  1.00  0.00           O  
ATOM     81  N   THR A  22      20.834  21.799  12.832  1.00  0.00           N  
ATOM     82  CA  THR A  22      21.698  20.832  13.471  1.00  0.00           C  
ATOM     83  C   THR A  22      22.813  21.537  14.240  1.00  0.00           C  
ATOM     84  O   THR A  22      22.951  22.753  14.111  1.00  0.00           O  
ATOM     85  N   ILE A  23      23.526  20.819  15.099  1.00  0.00           N  
ATOM     86  CA  ILE A  23      24.551  21.288  16.011  1.00  0.00           C  
ATOM     87  C   ILE A  23      25.621  22.101  15.286  1.00  0.00           C  
ATOM     88  O   ILE A  23      25.971  23.195  15.721  1.00  0.00           O  
ATOM     89  N   GLU A  24      26.046  21.633  14.115  1.00  0.00           N  
ATOM     90  CA  GLU A  24      26.911  22.327  13.183  1.00  0.00           C  
ATOM     91  C   GLU A  24      26.515  23.766  12.830  1.00  0.00           C  
ATOM     92  O   GLU A  24      27.451  24.530  12.609  1.00  0.00           O  
ATOM     93  N   ASN A  25      25.222  24.051  12.755  1.00  0.00           N  
ATOM     94  CA  ASN A  25      24.675  25.273  12.195  1.00  0.00           C  
ATOM     95  C   ASN A  25      24.665  26.353  13.270  1.00  0.00           C  
ATOM     96  O   ASN A  25      24.780  27.534  12.943  1.00  0.00           O  
ATOM     97  N   VAL A  26      24.830  25.912  14.513  1.00  0.00           N  
ATOM     98  CA  VAL A  26      24.920  26.835  15.631  1.00  0.00           C  
ATOM     99  C   VAL A  26      26.379  27.299  15.598  1.00  0.00           C  
ATOM    100  O   VAL A  26      26.774  28.461  15.649  1.00  0.00           O  
ATOM    101  N   LYS A  27      27.308  26.340  15.578  1.00  0.00           N  
ATOM    102  CA  LYS A  27      28.750  26.415  15.617  1.00  0.00           C  
ATOM    103  C   LYS A  27      29.292  27.154  14.394  1.00  0.00           C  
ATOM    104  O   LYS A  27      30.238  27.936  14.419  1.00  0.00           O  
ATOM    105  N   ALA A  28      28.679  27.067  13.218  1.00  0.00           N  
ATOM    106  CA  ALA A  28      28.975  27.825  12.026  1.00  0.00           C  
ATOM    107  C   ALA A  28      28.485  29.270  12.206  1.00  0.00           C  
ATOM    108  O   ALA A  28      29.179  30.178  11.773  1.00  0.00           O  
ATOM    109  N   LYS A  29      27.360  29.552  12.860  1.00  0.00           N  
ATOM    110  CA  LYS A  29      27.023  30.930  13.167  1.00  0.00           C  
ATOM    111  C   LYS A  29      28.014  31.512  14.184  1.00  0.00           C  
ATOM    112  O   LYS A  29      28.101  32.739  14.150  1.00  0.00           O  
ATOM    113  N   ILE A  30      28.647  30.786  15.093  1.00  0.00           N  
ATOM    114  CA  ILE A  30      29.649  31.289  16.014  1.00  0.00           C  
ATOM    115  C   ILE A  30      30.881  31.537  15.149  1.00  0.00           C  
ATOM    116  O   ILE A  30      31.592  32.519  15.350  1.00  0.00           O  
ATOM    117  N   GLN A  31      31.245  30.671  14.215  1.00  0.00           N  
ATOM    118  CA  GLN A  31      32.359  30.932  13.325  1.00  0.00           C  
ATOM    119  C   GLN A  31      32.314  32.249  12.553  1.00  0.00           C  
ATOM    120  O   GLN A  31      33.378  32.824  12.336  1.00  0.00           O  
ATOM    121  N   ASP A  32      31.127  32.623  12.073  1.00  0.00           N  
ATOM    122  CA  ASP A  32      30.996  33.898  11.398  1.00  0.00           C  
ATOM    123  C   ASP A  32      31.182  35.081  12.355  1.00  0.00           C  
ATOM    124  O   ASP A  32      31.595  36.126  11.854  1.00  0.00           O  
ATOM    125  N   LYS A  33      31.032  34.878  13.655  1.00  0.00           N  
ATOM    126  CA  LYS A  33      31.272  35.877  14.676  1.00  0.00           C  
ATOM    127  C   LYS A  33      32.696  35.773  15.235  1.00  0.00           C  
ATOM    128  O   LYS A  33      33.408  36.773  15.184  1.00  0.00           O  
ATOM    129  N   GLU A  34      33.107  34.671  15.857  1.00  0.00           N  
ATOM    130  CA  GLU A  34      34.299  34.481  16.663  1.00  0.00           C  
ATOM    131  C   GLU A  34      35.501  33.976  15.862  1.00  0.00           C  
ATOM    132  O   GLU A  34      36.653  34.067  16.299  1.00  0.00           O  
ATOM    133  N   GLY A  35      35.232  33.244  14.786  1.00  0.00           N  
ATOM    134  CA  GLY A  35      36.250  32.762  13.882  1.00  0.00           C  
ATOM    135  C   GLY A  35      36.489  31.254  14.018  1.00  0.00           C  
ATOM    136  O   GLY A  35      37.102  30.620  13.173  1.00  0.00           O  
ATOM    137  N   ILE A  36      36.139  30.805  15.225  1.00  0.00           N  
ATOM    138  CA  ILE A  36      36.416  29.500  15.775  1.00  0.00           C  
ATOM    139  C   ILE A  36      35.752  28.478  14.860  1.00  0.00           C  
ATOM    140  O   ILE A  36      34.524  28.488  14.835  1.00  0.00           O  
ATOM    141  N   PRO A  37      36.448  27.551  14.197  1.00  0.00           N  
ATOM    142  CA  PRO A  37      35.759  26.539  13.421  1.00  0.00           C  
ATOM    143  C   PRO A  37      34.944  25.516  14.205  1.00  0.00           C  
ATOM    144  O   PRO A  37      35.118  25.344  15.407  1.00  0.00           O  
ATOM    145  N   PRO A  38      33.960  24.853  13.597  1.00  0.00           N  
ATOM    146  CA  PRO A  38      33.062  23.860  14.150  1.00  0.00           C  
ATOM    147  C   PRO A  38      33.798  22.660  14.756  1.00  0.00           C  
ATOM    148  O   PRO A  38      33.311  22.137  15.759  1.00  0.00           O  
ATOM    149  N   ASP A  39      34.947  22.202  14.265  1.00  0.00           N  
ATOM    150  CA  ASP A  39      35.560  21.044  14.878  1.00  0.00           C  
ATOM    151  C   ASP A  39      36.452  21.438  16.061  1.00  0.00           C  
ATOM    152  O   ASP A  39      37.013  20.547  16.697  1.00  0.00           O  
ATOM    153  N   GLN A  40      36.690  22.734  16.213  1.00  0.00           N  
ATOM    154  CA  GLN A  40      37.461  23.226  17.337  1.00  0.00           C  
ATOM    155  C   GLN A  40      36.605  23.671  18.522  1.00  0.00           C  
ATOM    156  O   GLN A  40      37.027  23.671  19.678  1.00  0.00           O  
ATOM    157  N   GLN A  41      35.352  24.007  18.213  1.00  0.00           N  
ATOM    158  CA  GLN A  41      34.352  24.441  19.177  1.00  0.00           C  
ATOM    159  C   GLN A  41      33.894  23.235  19.983  1.00  0.00           C  
ATOM    160  O   GLN A  41      33.446  22.324  19.296  1.00  0.00           O  
ATOM    161  N   ARG A  42      34.002  23.205  21.309  1.00  0.00           N  
ATOM    162  CA  ARG A  42      33.315  22.268  22.176  1.00  0.00           C  
ATOM    163  C   ARG A  42      32.102  22.986  22.778  1.00  0.00           C  
ATOM    164  O   ARG A  42      32.232  24.086  23.307  1.00  0.00           O  
ATOM    165  N   LEU A  43      30.895  22.479  22.517  1.00  0.00           N  
ATOM    166  CA  LEU A  43      29.558  22.962  22.774  1.00  0.00           C  
ATOM    167  C   LEU A  43      28.799  21.957  23.637  1.00  0.00           C  
ATOM    168  O   LEU A  43      28.403  20.913  23.118  1.00  0.00           O  
ATOM    169  N   ILE A  44      28.689  22.341  24.903  1.00  0.00           N  
ATOM    170  CA  ILE A  44      27.918  21.646  25.917  1.00  0.00           C  
ATOM    171  C   ILE A  44      26.530  22.251  26.096  1.00  0.00           C  
ATOM    172  O   ILE A  44      26.305  23.410  25.744  1.00  0.00           O  
ATOM    173  N   PHE A  45      25.507  21.505  26.498  1.00  0.00           N  
ATOM    174  CA  PHE A  45      24.121  21.832  26.798  1.00  0.00           C  
ATOM    175  C   PHE A  45      23.534  20.892  27.860  1.00  0.00           C  
ATOM    176  O   PHE A  45      23.410  19.690  27.658  1.00  0.00           O  
ATOM    177  N   ALA A  46      23.313  21.409  29.060  1.00  0.00           N  
ATOM    178  CA  ALA A  46      22.427  21.021  30.142  1.00  0.00           C  
ATOM    179  C   ALA A  46      22.773  19.734  30.904  1.00  0.00           C  
ATOM    180  O   ALA A  46      21.949  19.197  31.630  1.00  0.00           O  
ATOM    181  N   GLY A  47      24.067  19.462  30.940  1.00  0.00           N  
ATOM    182  CA  GLY A  47      24.874  18.494  31.673  1.00  0.00           C  
ATOM    183  C   GLY A  47      25.486  17.536  30.653  1.00  0.00           C  
ATOM    184  O   GLY A  47      26.166  16.637  31.151  1.00  0.00           O  
ATOM    185  N   LYS A  48      25.104  17.532  29.381  1.00  0.00           N  
ATOM    186  CA  LYS A  48      25.489  16.472  28.466  1.00  0.00           C  
ATOM    187  C   LYS A  48      26.199  17.161  27.302  1.00  0.00           C  
ATOM    188  O   LYS A  48      26.144  18.366  27.056  1.00  0.00           O  
ATOM    189  N   GLN A  49      26.920  16.318  26.567  1.00  0.00           N  
ATOM    190  CA  GLN A  49      27.655  16.468  25.327  1.00  0.00           C  
ATOM    191  C   GLN A  49      26.667  16.410  24.166  1.00  0.00           C  
ATOM    192  O   GLN A  49      25.615  15.768  24.238  1.00  0.00           O  
ATOM    193  N   LEU A  50      27.031  17.124  23.111  1.00  0.00           N  
ATOM    194  CA  LEU A  50      26.237  17.325  21.911  1.00  0.00           C  
ATOM    195  C   LEU A  50      26.932  16.623  20.748  1.00  0.00           C  
ATOM    196  O   LEU A  50      28.019  17.031  20.340  1.00  0.00           O  
ATOM    197  N   GLU A  51      26.397  15.474  20.326  1.00  0.00           N  
ATOM    198  CA  GLU A  51      26.975  14.556  19.365  1.00  0.00           C  
ATOM    199  C   GLU A  51      26.325  15.011  18.051  1.00  0.00           C  
ATOM    200  O   GLU A  51      25.232  15.556  17.969  1.00  0.00           O  
ATOM    201  N   ASP A  52      27.079  14.813  16.981  1.00  0.00           N  
ATOM    202  CA  ASP A  52      26.891  15.386  15.663  1.00  0.00           C  
ATOM    203  C   ASP A  52      25.766  14.731  14.846  1.00  0.00           C  
ATOM    204  O   ASP A  52      25.584  13.522  14.971  1.00  0.00           O  
ATOM    205  N   GLY A  53      25.155  15.486  13.932  1.00  0.00           N  
ATOM    206  CA  GLY A  53      24.171  15.012  12.974  1.00  0.00           C  
ATOM    207  C   GLY A  53      22.684  15.123  13.307  1.00  0.00           C  
ATOM    208  O   GLY A  53      21.913  15.177  12.353  1.00  0.00           O  
ATOM    209  N   ARG A  54      22.387  15.198  14.598  1.00  0.00           N  
ATOM    210  CA  ARG A  54      21.080  15.525  15.151  1.00  0.00           C  
ATOM    211  C   ARG A  54      20.567  16.960  15.014  1.00  0.00           C  
ATOM    212  O   ARG A  54      21.331  17.896  14.835  1.00  0.00           O  
ATOM    213  N   THR A  55      19.268  17.183  15.187  1.00  0.00           N  
ATOM    214  CA  THR A  55      18.685  18.509  15.054  1.00  0.00           C  
ATOM    215  C   THR A  55      18.484  19.059  16.472  1.00  0.00           C  
ATOM    216  O   THR A  55      18.402  18.307  17.439  1.00  0.00           O  
ATOM    217  N   LEU A  56      18.257  20.367  16.495  1.00  0.00           N  
ATOM    218  CA  LEU A  56      17.842  20.995  17.739  1.00  0.00           C  
ATOM    219  C   LEU A  56      16.516  20.489  18.332  1.00  0.00           C  
ATOM    220  O   LEU A  56      16.494  20.122  19.506  1.00  0.00           O  
ATOM    221  N   SER A  57      15.438  20.358  17.568  1.00  0.00           N  
ATOM    222  CA  SER A  57      14.231  19.594  17.814  1.00  0.00           C  
ATOM    223  C   SER A  57      14.461  18.198  18.392  1.00  0.00           C  
ATOM    224  O   SER A  57      13.776  17.789  19.317  1.00  0.00           O  
ATOM    225  N   ASP A  58      15.400  17.393  17.890  1.00  0.00           N  
ATOM    226  CA  ASP A  58      15.756  16.026  18.203  1.00  0.00           C  
ATOM    227  C   ASP A  58      16.266  15.922  19.646  1.00  0.00           C  
ATOM    228  O   ASP A  58      15.734  15.270  20.542  1.00  0.00           O  
ATOM    229  N   TYR A  59      17.243  16.771  19.952  1.00  0.00           N  
ATOM    230  CA  TYR A  59      17.903  17.094  21.201  1.00  0.00           C  
ATOM    231  C   TYR A  59      17.017  17.938  22.107  1.00  0.00           C  
ATOM    232  O   TYR A  59      17.334  18.145  23.274  1.00  0.00           O  
ATOM    233  N   ASN A  60      15.937  18.500  21.554  1.00  0.00           N  
ATOM    234  CA  ASN A  60      14.905  19.041  22.419  1.00  0.00           C  
ATOM    235  C   ASN A  60      15.108  20.497  22.861  1.00  0.00           C  
ATOM    236  O   ASN A  60      14.584  20.913  23.895  1.00  0.00           O  
ATOM    237  N   ILE A  61      15.917  21.241  22.118  1.00  0.00           N  
ATOM    238  CA  ILE A  61      16.412  22.557  22.496  1.00  0.00           C  
ATOM    239  C   ILE A  61      15.233  23.479  22.208  1.00  0.00           C  
ATOM    240  O   ILE A  61      14.501  23.272  21.241  1.00  0.00           O  
ATOM    241  N   GLN A  62      15.003  24.511  23.009  1.00  0.00           N  
ATOM    242  CA  GLN A  62      13.731  25.177  23.206  1.00  0.00           C  
ATOM    243  C   GLN A  62      13.974  26.676  23.363  1.00  0.00           C  
ATOM    244  O   GLN A  62      15.134  27.086  23.450  1.00  0.00           O  
ATOM    245  N   LYS A  63      12.875  27.437  23.397  1.00  0.00           N  
ATOM    246  CA  LYS A  63      12.896  28.881  23.522  1.00  0.00           C  
ATOM    247  C   LYS A  63      13.529  29.277  24.854  1.00  0.00           C  
ATOM    248  O   LYS A  63      13.145  28.779  25.901  1.00  0.00           O  
ATOM    249  N   GLU A  64      14.633  30.031  24.816  1.00  0.00           N  
ATOM    250  CA  GLU A  64      15.417  30.442  25.966  1.00  0.00           C  
ATOM    251  C   GLU A  64      16.481  29.454  26.457  1.00  0.00           C  
ATOM    252  O   GLU A  64      17.038  29.693  27.526  1.00  0.00           O  
ATOM    253  N   SER A  65      16.850  28.448  25.666  1.00  0.00           N  
ATOM    254  CA  SER A  65      17.853  27.482  26.090  1.00  0.00           C  
ATOM    255  C   SER A  65      19.267  28.045  26.129  1.00  0.00           C  
ATOM    256  O   SER A  65      19.582  28.854  25.256  1.00  0.00           O  
ATOM    257  N   THR A  66      20.066  27.671  27.124  1.00  0.00           N  
ATOM    258  CA  THR A  66      21.452  28.052  27.258  1.00  0.00           C  
ATOM    259  C   THR A  66      22.463  26.927  27.005  1.00  0.00           C  
ATOM    260  O   THR A  66      22.534  25.989  27.807  1.00  0.00           O  
ATOM    261  N   LEU A  67      23.299  27.095  25.982  1.00  0.00           N  
ATOM    262  CA  LEU A  67      24.413  26.251  25.611  1.00  0.00           C  
ATOM    263  C   LEU A  67      25.712  26.879  26.114  1.00  0.00           C  
ATOM    264  O   LEU A  67      25.808  28.107  26.163  1.00  0.00           O  
ATOM    265  N   HIS A  68      26.658  26.061  26.582  1.00  0.00           N  
ATOM    266  CA  HIS A  68      27.978  26.575  26.858  1.00  0.00           C  
ATOM    267  C   HIS A  68      29.007  26.079  25.844  1.00  0.00           C  
ATOM    268  O   HIS A  68      29.218  24.900  25.565  1.00  0.00           O  
ATOM    269  N   LEU A  69      29.646  27.109  25.291  1.00  0.00           N  
ATOM    270  CA  LEU A  69      30.763  27.064  24.369  1.00  0.00           C  
ATOM    271  C   LEU A  69      32.062  27.229  25.144  1.00  0.00           C  
ATOM    272  O   LEU A  69      32.176  28.103  26.008  1.00  0.00           O  
ATOM    273  N   VAL A  70      32.953  26.320  24.769  1.00  0.00           N  
ATOM    274  CA  VAL A  70      34.347  26.136  25.147  1.00  0.00           C  
ATOM    275  C   VAL A  70      35.199  26.210  23.877  1.00  0.00           C  
ATOM    276  O   VAL A  70      34.791  25.747  22.822  1.00  0.00           O  
TER
ENDMDL
MODEL      4
ATOM      1  N   GLN A   2      15.375  33.334  18.534  1.00  0.00           N  
ATOM      2  CA  GLN A   2      16.626  33.547  19.234  1.00  0.00           C  
ATOM      3  C   GLN A   2      16.848  32.572  20.385  1.00  0.00           C  
ATOM      4  O   GLN A   2      15.907  32.051  20.976  1.00  0.00           O  
ATOM      5  N   ILE A   3      18.100  32.139  20.520  1.00  0.00           N  
ATOM      6  CA  ILE A   3      18.642  31.337  21.600  1.00  0.00           C  
ATOM      7  C   ILE A   3      19.980  31.961  22.020  1.00  0.00           C  
ATOM      8  O   ILE A   3      20.599  32.732  21.289  1.00  0.00           O  
ATOM      9  N   PHE A   4      20.469  31.648  23.211  1.00  0.00           N  
ATOM     10  CA  PHE A   4      21.595  32.285  23.864  1.00  0.00           C  
ATOM     11  C   PHE A   4      22.659  31.235  24.207  1.00  0.00           C  
ATOM     12  O   PHE A   4      22.355  30.301  24.949  1.00  0.00           O  
ATOM     13  N   VAL A   5      23.795  31.341  23.525  1.00  0.00           N  
ATOM     14  CA  VAL A   5      24.914  30.450  23.756  1.00  0.00           C  
ATOM     15  C   VAL A   5      25.774  31.326  24.667  1.00  0.00           C  
ATOM     16  O   VAL A   5      26.173  32.448  24.340  1.00  0.00           O  
ATOM     17  N   LYS A   6      26.124  30.666  25.771  1.00  0.00           N  
ATOM     18  CA  LYS A   6      27.073  31.206  26.724  1.00  0.00           C  
ATOM     19  C   LYS A   6      28.455  30.730  26.295  1.00  0.00           C  
ATOM     20  O   LYS A   6      28.598  29.574  25.899  1.00  0.00           O  
ATOM     21  N   THR A   7      29.427  31.643  26.326  1.00  0.00           N  
ATOM     22  CA  THR A   7      30.811  31.240  26.210  1.00  0.00           C  
ATOM     23  C   THR A   7      31.549  31.551  27.507  1.00  0.00           C  
ATOM     24  O   THR A   7      31.273  32.574  28.131  1.00  0.00           O  
ATOM     25  N   LEU A   8      32.342  30.663  28.117  1.00  0.00           N  
ATOM     26  CA  LEU A   8      32.569  30.644  29.546  1.00  0.00           C  
ATOM     27  C   LEU A   8      33.455  31.781  30.048  1.00  0.00           C  
ATOM     28  O   LEU A   8      33.569  31.863  31.261  1.00  0.00           O  
ATOM     29  N   THR A   9      34.025  32.651  29.213  1.00  0.00           N  
ATOM     30  CA  THR A   9      34.506  33.959  29.580  1.00  0.00           C  
ATOM     31  C   THR A   9      33.436  35.036  29.772  1.00  0.00           C  
ATOM     32  O   THR A   9      33.734  36.153  30.186  1.00  0.00           O  
ATOM     33  N   GLY A  10      32.153  34.783  29.489  1.00  0.00           N  
ATOM     34  CA  GLY A  10      31.043  35.549  30.005  1.00  0.00           C  
ATOM     35  C   GLY A  10      30.126  36.018  28.864  1.00  0.00           C  
ATOM     36  O   GLY A  10      29.058  36.512  29.204  1.00  0.00           O  
ATOM     37  N   LYS A  11      30.547  35.770  27.623  1.00  0.00           N  
ATOM     38  CA  LYS A  11      30.016  36.372  26.424  1.00  0.00           C  
ATOM     39  C   LYS A  11      28.814  35.492  26.064  1.00  0.00           C  
ATOM     40  O   LYS A  11      28.985  34.287  25.881  1.00  0.00           O  
ATOM     41  N   THR A  12      27.682  36.170  25.885  1.00  0.00           N  
ATOM     42  CA  THR A  12      26.434  35.593  25.433  1.00  0.00           C  
ATOM     43  C   THR A  12      26.252  35.766  23.927  1.00  0.00           C  
ATOM     44  O   THR A  12      25.956  36.861  23.452  1.00  0.00           O  
ATOM     45  N   ILE A  13      26.496  34.736  23.110  1.00  0.00           N  
ATOM     46  CA  ILE A  13      26.329  34.749  21.670  1.00  0.00           C  
ATOM     47  C   ILE A  13      24.861  34.412  21.432  1.00  0.00           C  
ATOM     48  O   ILE A  13      24.307  33.349  21.725  1.00  0.00           O  
ATOM     49  N   THR A  14      24.185  35.416  20.893  1.00  0.00           N  
ATOM     50  CA  THR A  14      22.765  35.310  20.604  1.00  0.00           C  
ATOM     51  C   THR A  14      22.698  34.997  19.107  1.00  0.00           C  
ATOM     52  O   THR A  14      23.085  35.786  18.252  1.00  0.00           O  
ATOM     53  N   LEU A  15      22.227  33.791  18.792  1.00  0.00           N  
ATOM     54  CA  LEU A  15      22.111  33.327  17.430  1.00  0.00           C  
ATOM     55  C   LEU A  15      20.643  33.324  16.974  1.00  0.00           C  
ATOM     56  O   LEU A  15      19.763  33.110  17.807  1.00  0.00           O  
ATOM     57  N   GLU A  16      20.381  33.438  15.684  1.00  0.00           N  
ATOM     58  CA  GLU A  16      19.095  33.155  15.074  1.00  0.00           C  
ATOM     59  C   GLU A  16      19.143  31.699  14.603  1.00  0.00           C  
ATOM     60  O   GLU A  16      20.110  31.201  14.030  1.00  0.00           O  
ATOM     61  N   VAL A  17      18.052  30.981  14.839  1.00  0.00           N  
ATOM     62  CA  VAL A  17      17.839  29.565  14.616  1.00  0.00           C  
ATOM     63  C   VAL A  17      16.396  29.262  14.181  1.00  0.00           C  
ATOM     64  O   VAL A  17      15.570  30.170  14.285  1.00  0.00           O  
ATOM     65  N   GLU A  18      16.082  28.020  13.861  1.00  0.00           N  
ATOM     66  CA  GLU A  18      14.763  27.420  13.717  1.00  0.00           C  
ATOM     67  C   GLU A  18      14.769  26.010  14.325  1.00  0.00           C  
ATOM     68  O   GLU A  18      15.889  25.523  14.493  1.00  0.00           O  
ATOM     69  N   PRO A  19      13.673  25.448  14.808  1.00  0.00           N  
ATOM     70  CA  PRO A  19      13.667  24.177  15.511  1.00  0.00           C  
ATOM     71  C   PRO A  19      14.190  22.962  14.752  1.00  0.00           C  
ATOM     72  O   PRO A  19      14.880  22.197  15.409  1.00  0.00           O  
ATOM     73  N   SER A  20      14.079  22.862  13.428  1.00  0.00           N  
ATOM     74  CA  SER A  20      14.556  21.735  12.636  1.00  0.00           C  
ATOM     75  C   SER A  20      15.982  21.980  12.151  1.00  0.00           C  
ATOM     76  O   SER A  20      16.420  21.361  11.193  1.00  0.00           O  
ATOM     77  N   ASP A  21      16.757  22.871  12.774  1.00  0.00           N  
ATOM     78  CA  ASP A  21      18.023  23.274  12.193  1.00  0.00           C  
ATOM     79  C   ASP A  21      19.158  22.524  12.898  1.00  0.00           C  
ATOM     80  O   ASP A  21      19.153  22.530  14.126  1.00  0.00           O  
ATOM     81  N   THR A  22      20.127  22.128  12.091  1.00  0.00           N  
ATOM     82  CA  THR A  22      21.155  21.202  12.506  1.00  0.00           C  
ATOM     83  C   THR A  22      22.107  21.856  13.513  1.00  0.00           C  
ATOM     84  O   THR A  22      22.263  23.077  13.564  1.00  0.00           O  
ATOM     85  N   ILE A  23      22.807  21.061  14.315  1.00  0.00           N  
ATOM     86  CA  ILE A  23      23.946  21.538  15.071  1.00  0.00           C  
ATOM     87  C   ILE A  23      25.068  22.049  14.147  1.00  0.00           C  
ATOM     88  O   ILE A  23      25.763  22.955  14.583  1.00  0.00           O  
ATOM     89  N   GLU A  24      25.260  21.593  12.910  1.00  0.00           N  
ATOM     90  CA  GLU A  24      26.236  22.039  11.946  1.00  0.00           C  
ATOM     91  C   GLU A  24      25.910  23.508  11.662  1.00  0.00           C  
ATOM     92  O   GLU A  24      26.859  24.291  11.752  1.00  0.00           O  
ATOM     93  N   ASN A  25      24.675  23.941  11.397  1.00  0.00           N  
ATOM     94  CA  ASN A  25      24.247  25.287  11.076  1.00  0.00           C  
ATOM     95  C   ASN A  25      24.378  26.222  12.278  1.00  0.00           C  
ATOM     96  O   ASN A  25      24.838  27.345  12.084  1.00  0.00           O  
ATOM     97  N   VAL A  26      24.085  25.753  13.490  1.00  0.00           N  
ATOM     98  CA  VAL A  26      24.390  26.362  14.760  1.00  0.00           C  
ATOM     99  C   VAL A  26      25.873  26.672  14.972  1.00  0.00           C  
ATOM    100  O   VAL A  26      26.249  27.840  15.076  1.00  0.00           O  
ATOM    101  N   LYS A  27      26.717  25.645  14.898  1.00  0.00           N  
ATOM    102  CA  LYS A  27      28.161  25.667  14.914  1.00  0.00           C  
ATOM    103  C   LYS A  27      28.685  26.623  13.837  1.00  0.00           C  
ATOM    104  O   LYS A  27      29.614  27.382  14.131  1.00  0.00           O  
ATOM    105  N   ALA A  28      27.977  26.663  12.718  1.00  0.00           N  
ATOM    106  CA  ALA A  28      28.404  27.603  11.700  1.00  0.00           C  
ATOM    107  C   ALA A  28      28.143  29.058  12.114  1.00  0.00           C  
ATOM    108  O   ALA A  28      28.819  30.027  11.765  1.00  0.00           O  
ATOM    109  N   LYS A  29      27.092  29.336  12.877  1.00  0.00           N  
ATOM    110  CA  LYS A  29      26.635  30.681  13.174  1.00  0.00           C  
ATOM    111  C   LYS A  29      27.427  31.194  14.380  1.00  0.00           C  
ATOM    112  O   LYS A  29      27.422  32.404  14.586  1.00  0.00           O  
ATOM    113  N   ILE A  30      28.241  30.366  15.035  1.00  0.00           N  
ATOM    114  CA  ILE A  30      29.176  30.822  16.047  1.00  0.00           C  
ATOM    115  C   ILE A  30      30.483  31.222  15.349  1.00  0.00           C  
ATOM    116  O   ILE A  30      31.153  32.153  15.796  1.00  0.00           O  
ATOM    117  N   GLN A  31      30.822  30.522  14.266  1.00  0.00           N  
ATOM    118  CA  GLN A  31      31.958  30.850  13.448  1.00  0.00           C  
ATOM    119  C   GLN A  31      31.739  32.216  12.799  1.00  0.00           C  
ATOM    120  O   GLN A  31      32.659  33.027  12.701  1.00  0.00           O  
ATOM    121  N   ASP A  32      30.501  32.481  12.377  1.00  0.00           N  
ATOM    122  CA  ASP A  32      30.055  33.734  11.798  1.00  0.00           C  
ATOM    123  C   ASP A  32      30.339  34.965  12.655  1.00  0.00           C  
ATOM    124  O   ASP A  32      30.951  35.933  12.207  1.00  0.00           O  
ATOM    125  N   LYS A  33      29.949  34.922  13.926  1.00  0.00           N  
ATOM    126  CA  LYS A  33      30.190  36.061  14.799  1.00  0.00           C  
ATOM    127  C   LYS A  33      31.577  36.134  15.427  1.00  0.00           C  
ATOM    128  O   LYS A  33      32.312  37.119  15.336  1.00  0.00           O  
ATOM    129  N   GLU A  34      31.982  35.035  16.070  1.00  0.00           N  
ATOM    130  CA  GLU A  34      33.170  34.913  16.890  1.00  0.00           C  
ATOM    131  C   GLU A  34      34.459  34.371  16.282  1.00  0.00           C  
ATOM    132  O   GLU A  34      35.505  34.593  16.899  1.00  0.00           O  
ATOM    133  N   GLY A  35      34.265  33.759  15.128  1.00  0.00           N  
ATOM    134  CA  GLY A  35      35.231  33.277  14.163  1.00  0.00           C  
ATOM    135  C   GLY A  35      35.634  31.806  14.293  1.00  0.00           C  
ATOM    136  O   GLY A  35      36.605  31.415  13.643  1.00  0.00           O  
ATOM    137  N   ILE A  36      35.058  31.005  15.182  1.00  0.00           N  
ATOM    138  CA  ILE A  36      35.674  29.820  15.722  1.00  0.00           C  
ATOM    139  C   ILE A  36      35.337  28.697  14.742  1.00  0.00           C  
ATOM    140  O   ILE A  36      34.149  28.402  14.621  1.00  0.00           O  
ATOM    141  N   PRO A  37      36.321  28.001  14.186  1.00  0.00           N  
ATOM    142  CA  PRO A  37      36.049  26.781  13.437  1.00  0.00           C  
ATOM    143  C   PRO A  37      35.426  25.708  14.327  1.00  0.00           C  
ATOM    144  O   PRO A  37      35.976  25.522  15.414  1.00  0.00           O  
ATOM    145  N   PRO A  38      34.363  24.992  13.981  1.00  0.00           N  
ATOM    146  CA  PRO A  38      33.736  23.900  14.696  1.00  0.00           C  
ATOM    147  C   PRO A  38      34.574  22.816  15.394  1.00  0.00           C  
ATOM    148  O   PRO A  38      34.130  22.345  16.440  1.00  0.00           O  
ATOM    149  N   ASP A  39      35.806  22.596  14.949  1.00  0.00           N  
ATOM    150  CA  ASP A  39      36.838  21.849  15.637  1.00  0.00           C  
ATOM    151  C   ASP A  39      37.109  22.295  17.069  1.00  0.00           C  
ATOM    152  O   ASP A  39      37.078  21.493  17.993  1.00  0.00           O  
ATOM    153  N   GLN A  40      37.322  23.581  17.335  1.00  0.00           N  
ATOM    154  CA  GLN A  40      37.685  24.209  18.592  1.00  0.00           C  
ATOM    155  C   GLN A  40      36.436  24.467  19.439  1.00  0.00           C  
ATOM    156  O   GLN A  40      36.533  24.537  20.666  1.00  0.00           O  
ATOM    157  N   GLN A  41      35.251  24.460  18.834  1.00  0.00           N  
ATOM    158  CA  GLN A  41      33.958  24.477  19.493  1.00  0.00           C  
ATOM    159  C   GLN A  41      33.623  23.092  20.054  1.00  0.00           C  
ATOM    160  O   GLN A  41      33.080  22.266  19.331  1.00  0.00           O  
ATOM    161  N   ARG A  42      33.813  22.817  21.342  1.00  0.00           N  
ATOM    162  CA  ARG A  42      33.634  21.499  21.922  1.00  0.00           C  
ATOM    163  C   ARG A  42      32.297  21.485  22.656  1.00  0.00           C  
ATOM    164  O   ARG A  42      32.082  22.266  23.575  1.00  0.00           O  
ATOM    165  N   LEU A  43      31.287  20.793  22.118  1.00  0.00           N  
ATOM    166  CA  LEU A  43      29.922  20.646  22.566  1.00  0.00           C  
ATOM    167  C   LEU A  43      29.863  19.723  23.787  1.00  0.00           C  
ATOM    168  O   LEU A  43      29.035  18.811  23.823  1.00  0.00           O  
ATOM    169  N   ILE A  44      30.554  20.163  24.828  1.00  0.00           N  
ATOM    170  CA  ILE A  44      30.510  19.541  26.141  1.00  0.00           C  
ATOM    171  C   ILE A  44      29.358  20.150  26.933  1.00  0.00           C  
ATOM    172  O   ILE A  44      29.471  21.347  27.204  1.00  0.00           O  
ATOM    173  N   PHE A  45      28.243  19.474  27.184  1.00  0.00           N  
ATOM    174  CA  PHE A  45      26.986  19.943  27.714  1.00  0.00           C  
ATOM    175  C   PHE A  45      26.476  19.022  28.825  1.00  0.00           C  
ATOM    176  O   PHE A  45      26.301  17.832  28.551  1.00  0.00           O  
ATOM    177  N   ALA A  46      26.318  19.543  30.036  1.00  0.00           N  
ATOM    178  CA  ALA A  46      25.866  18.904  31.255  1.00  0.00           C  
ATOM    179  C   ALA A  46      26.648  17.672  31.702  1.00  0.00           C  
ATOM    180  O   ALA A  46      26.129  16.574  31.895  1.00  0.00           O  
ATOM    181  N   GLY A  47      27.971  17.758  31.633  1.00  0.00           N  
ATOM    182  CA  GLY A  47      28.933  16.727  31.976  1.00  0.00           C  
ATOM    183  C   GLY A  47      29.397  15.868  30.805  1.00  0.00           C  
ATOM    184  O   GLY A  47      30.519  15.352  30.782  1.00  0.00           O  
ATOM    185  N   LYS A  48      28.501  15.737  29.831  1.00  0.00           N  
ATOM    186  CA  LYS A  48      28.646  14.831  28.715  1.00  0.00           C  
ATOM    187  C   LYS A  48      29.318  15.602  27.573  1.00  0.00           C  
ATOM    188  O   LYS A  48      29.149  16.813  27.420  1.00  0.00           O  
ATOM    189  N   GLN A  49      29.826  14.899  26.570  1.00  0.00           N  
ATOM    190  CA  GLN A  49      30.004  15.280  25.183  1.00  0.00           C  
ATOM    191  C   GLN A  49      28.610  15.050  24.586  1.00  0.00           C  
ATOM    192  O   GLN A  49      28.174  13.902  24.545  1.00  0.00           O  
ATOM    193  N   LEU A  50      27.970  16.107  24.090  1.00  0.00           N  
ATOM    194  CA  LEU A  50      26.681  16.042  23.444  1.00  0.00           C  
ATOM    195  C   LEU A  50      27.010  15.795  21.970  1.00  0.00           C  
ATOM    196  O   LEU A  50      28.031  16.342  21.566  1.00  0.00           O  
ATOM    197  N   GLU A  51      26.312  15.035  21.136  1.00  0.00           N  
ATOM    198  CA  GLU A  51      26.905  14.596  19.892  1.00  0.00           C  
ATOM    199  C   GLU A  51      26.513  15.505  18.730  1.00  0.00           C  
ATOM    200  O   GLU A  51      25.512  16.209  18.844  1.00  0.00           O  
ATOM    201  N   ASP A  52      27.232  15.388  17.620  1.00  0.00           N  
ATOM    202  CA  ASP A  52      26.974  15.918  16.298  1.00  0.00           C  
ATOM    203  C   ASP A  52      25.828  15.150  15.631  1.00  0.00           C  
ATOM    204  O   ASP A  52      25.803  13.927  15.719  1.00  0.00           O  
ATOM    205  N   GLY A  53      24.957  15.739  14.817  1.00  0.00           N  
ATOM    206  CA  GLY A  53      24.180  14.988  13.837  1.00  0.00           C  
ATOM    207  C   GLY A  53      22.670  15.029  14.028  1.00  0.00           C  
ATOM    208  O   GLY A  53      21.928  14.313  13.360  1.00  0.00           O  
ATOM    209  N   ARG A  54      22.235  15.854  14.984  1.00  0.00           N  
ATOM    210  CA  ARG A  54      20.857  16.121  15.321  1.00  0.00           C  
ATOM    211  C   ARG A  54      20.565  17.618  15.206  1.00  0.00           C  
ATOM    212  O   ARG A  54      21.453  18.452  15.019  1.00  0.00           O  
ATOM    213  N   THR A  55      19.301  18.011  15.286  1.00  0.00           N  
ATOM    214  CA  THR A  55      18.710  19.340  15.234  1.00  0.00           C  
ATOM    215  C   THR A  55      18.401  19.829  16.654  1.00  0.00           C  
ATOM    216  O   THR A  55      18.506  19.105  17.643  1.00  0.00           O  
ATOM    217  N   LEU A  56      18.146  21.131  16.770  1.00  0.00           N  
ATOM    218  CA  LEU A  56      17.641  21.857  17.921  1.00  0.00           C  
ATOM    219  C   LEU A  56      16.534  21.126  18.665  1.00  0.00           C  
ATOM    220  O   LEU A  56      16.647  21.081  19.893  1.00  0.00           O  
ATOM    221  N   SER A  57      15.510  20.549  18.039  1.00  0.00           N  
ATOM    222  CA  SER A  57      14.414  19.887  18.707  1.00  0.00           C  
ATOM    223  C   SER A  57      14.741  18.431  19.057  1.00  0.00           C  
ATOM    224  O   SER A  57      14.079  17.836  19.898  1.00  0.00           O  
ATOM    225  N   ASP A  58      15.710  17.816  18.371  1.00  0.00           N  
ATOM    226  CA  ASP A  58      16.136  16.488  18.767  1.00  0.00           C  
ATOM    227  C   ASP A  58      16.863  16.458  20.109  1.00  0.00           C  
ATOM    228  O   ASP A  58      16.875  15.375  20.691  1.00  0.00           O  
ATOM    229  N   TYR A  59      17.356  17.609  20.564  1.00  0.00           N  
ATOM    230  CA  TYR A  59      17.789  17.890  21.912  1.00  0.00           C  
ATOM    231  C   TYR A  59      16.836  18.828  22.665  1.00  0.00           C  
ATOM    232  O   TYR A  59      17.219  19.243  23.764  1.00  0.00           O  
ATOM    233  N   ASN A  60      15.649  19.071  22.115  1.00  0.00           N  
ATOM    234  CA  ASN A  60      14.502  19.707  22.733  1.00  0.00           C  
ATOM    235  C   ASN A  60      14.634  21.173  23.154  1.00  0.00           C  
ATOM    236  O   ASN A  60      13.886  21.704  23.975  1.00  0.00           O  
ATOM    237  N   ILE A  61      15.495  21.893  22.448  1.00  0.00           N  
ATOM    238  CA  ILE A  61      15.762  23.292  22.702  1.00  0.00           C  
ATOM    239  C   ILE A  61      14.641  24.174  22.118  1.00  0.00           C  
ATOM    240  O   ILE A  61      14.200  23.952  21.003  1.00  0.00           O  
ATOM    241  N   GLN A  62      14.096  25.115  22.876  1.00  0.00           N  
ATOM    242  CA  GLN A  62      13.021  26.049  22.636  1.00  0.00           C  
ATOM    243  C   GLN A  62      13.619  27.443  22.452  1.00  0.00           C  
ATOM    244  O   GLN A  62      14.778  27.786  22.669  1.00  0.00           O  
ATOM    245  N   LYS A  63      12.741  28.274  21.893  1.00  0.00           N  
ATOM    246  CA  LYS A  63      12.926  29.711  21.748  1.00  0.00           C  
ATOM    247  C   LYS A  63      13.259  30.410  23.061  1.00  0.00           C  
ATOM    248  O   LYS A  63      12.778  30.029  24.123  1.00  0.00           O  
ATOM    249  N   GLU A  64      14.100  31.441  23.081  1.00  0.00           N  
ATOM    250  CA  GLU A  64      14.636  32.117  24.238  1.00  0.00           C  
ATOM    251  C   GLU A  64      15.420  31.272  25.250  1.00  0.00           C  
ATOM    252  O   GLU A  64      15.714  31.726  26.353  1.00  0.00           O  
ATOM    253  N   SER A  65      15.732  30.034  24.870  1.00  0.00           N  
ATOM    254  CA  SER A  65      16.543  29.158  25.689  1.00  0.00           C  
ATOM    255  C   SER A  65      18.029  29.544  25.720  1.00  0.00           C  
ATOM    256  O   SER A  65      18.612  29.861  24.687  1.00  0.00           O  
ATOM    257  N   THR A  66      18.634  29.270  26.869  1.00  0.00           N  
ATOM    258  CA  THR A  66      20.011  29.488  27.257  1.00  0.00           C  
ATOM    259  C   THR A  66      20.720  28.136  27.257  1.00  0.00           C  
ATOM    260  O   THR A  66      20.239  27.074  27.677  1.00  0.00           O  
ATOM    261  N   LEU A  67      21.950  28.178  26.762  1.00  0.00           N  
ATOM    262  CA  LEU A  67      22.809  27.009  26.793  1.00  0.00           C  
ATOM    263  C   LEU A  67      24.292  27.404  26.768  1.00  0.00           C  
ATOM    264  O   LEU A  67      24.500  28.608  26.627  1.00  0.00           O  
ATOM    265  N   HIS A  68      25.192  26.431  26.793  1.00  0.00           N  
ATOM    266  CA  HIS A  68      26.608  26.656  26.994  1.00  0.00           C  
ATOM    267  C   HIS A  68      27.448  26.043  25.877  1.00  0.00           C  
ATOM    268  O   HIS A  68      27.223  24.894  25.497  1.00  0.00           O  
ATOM    269  N   LEU A  69      28.375  26.820  25.320  1.00  0.00           N  
ATOM    270  CA  LEU A  69      29.434  26.391  24.432  1.00  0.00           C  
ATOM    271  C   LEU A  69      30.717  26.343  25.268  1.00  0.00           C  
ATOM    272  O   LEU A  69      30.996  27.229  26.075  1.00  0.00           O  
ATOM    273  N   VAL A  70      31.602  25.411  24.942  1.00  0.00           N  
ATOM    274  CA  VAL A  70      32.965  25.369  25.460  1.00  0.00           C  
ATOM    275  C   VAL A  70      33.947  25.425  24.281  1.00  0.00           C  
ATOM    276  O   VAL A  70      33.673  25.149  23.114  1.00  0.00           O  
TER
ENDMDL
MODEL      5
ATOM      1  N   GLN A   2      15.352  32.004  19.338  1.00  0.00           N  
ATOM      2  CA  GLN A   2      16.618  32.405  19.901  1.00  0.00           C  
ATOM      3  C   GLN A   2      17.154  31.230  20.729  1.00  0.00           C  
ATOM      4  O   GLN A   2      16.525  30.441  21.442  1.00  0.00           O  
ATOM      5  N   ILE A   3      18.472  31.080  20.726  1.00  0.00           N  
ATOM      6  CA  ILE A   3      19.245  30.485  21.801  1.00  0.00           C  
ATOM      7  C   ILE A   3      20.360  31.465  22.163  1.00  0.00           C  
ATOM      8  O   ILE A   3      20.935  32.130  21.301  1.00  0.00           O  
ATOM      9  N   PHE A   4      20.640  31.511  23.457  1.00  0.00           N  
ATOM     10  CA  PHE A   4      21.831  32.155  23.968  1.00  0.00           C  
ATOM     11  C   PHE A   4      22.957  31.109  23.985  1.00  0.00           C  
ATOM     12  O   PHE A   4      22.799  30.007  24.506  1.00  0.00           O  
ATOM     13  N   VAL A   5      24.182  31.417  23.569  1.00  0.00           N  
ATOM     14  CA  VAL A   5      25.364  30.594  23.719  1.00  0.00           C  
ATOM     15  C   VAL A   5      26.440  31.381  24.459  1.00  0.00           C  
ATOM     16  O   VAL A   5      26.784  32.527  24.151  1.00  0.00           O  
ATOM     17  N   LYS A   6      26.857  30.794  25.572  1.00  0.00           N  
ATOM     18  CA  LYS A   6      27.749  31.397  26.544  1.00  0.00           C  
ATOM     19  C   LYS A   6      29.127  30.905  26.109  1.00  0.00           C  
ATOM     20  O   LYS A   6      29.395  29.712  26.267  1.00  0.00           O  
ATOM     21  N   THR A   7      29.874  31.847  25.543  1.00  0.00           N  
ATOM     22  CA  THR A   7      31.278  31.677  25.232  1.00  0.00           C  
ATOM     23  C   THR A   7      32.210  31.294  26.379  1.00  0.00           C  
ATOM     24  O   THR A   7      31.873  31.495  27.547  1.00  0.00           O  
ATOM     25  N   LEU A   8      33.375  30.758  26.019  1.00  0.00           N  
ATOM     26  CA  LEU A   8      34.357  30.242  26.945  1.00  0.00           C  
ATOM     27  C   LEU A   8      35.066  31.413  27.623  1.00  0.00           C  
ATOM     28  O   LEU A   8      35.600  31.273  28.729  1.00  0.00           O  
ATOM     29  N   THR A   9      35.049  32.551  26.932  1.00  0.00           N  
ATOM     30  CA  THR A   9      35.471  33.822  27.493  1.00  0.00           C  
ATOM     31  C   THR A   9      34.384  34.551  28.275  1.00  0.00           C  
ATOM     32  O   THR A   9      34.577  35.613  28.864  1.00  0.00           O  
ATOM     33  N   GLY A  10      33.177  33.982  28.329  1.00  0.00           N  
ATOM     34  CA  GLY A  10      32.158  34.403  29.266  1.00  0.00           C  
ATOM     35  C   GLY A  10      30.975  35.157  28.665  1.00  0.00           C  
ATOM     36  O   GLY A  10      29.864  35.220  29.194  1.00  0.00           O  
ATOM     37  N   LYS A  11      31.145  35.841  27.542  1.00  0.00           N  
ATOM     38  CA  LYS A  11      30.200  36.735  26.900  1.00  0.00           C  
ATOM     39  C   LYS A  11      29.058  35.882  26.339  1.00  0.00           C  
ATOM     40  O   LYS A  11      29.251  34.934  25.578  1.00  0.00           O  
ATOM     41  N   THR A  12      27.806  36.240  26.616  1.00  0.00           N  
ATOM     42  CA  THR A  12      26.591  35.584  26.187  1.00  0.00           C  
ATOM     43  C   THR A  12      26.180  36.180  24.831  1.00  0.00           C  
ATOM     44  O   THR A  12      25.734  37.321  24.784  1.00  0.00           O  
ATOM     45  N   ILE A  13      26.295  35.408  23.761  1.00  0.00           N  
ATOM     46  CA  ILE A  13      25.748  35.733  22.454  1.00  0.00           C  
ATOM     47  C   ILE A  13      24.347  35.139  22.237  1.00  0.00           C  
ATOM     48  O   ILE A  13      24.066  34.012  22.655  1.00  0.00           O  
ATOM     49  N   THR A  14      23.480  35.911  21.578  1.00  0.00           N  
ATOM     50  CA  THR A  14      22.289  35.386  20.945  1.00  0.00           C  
ATOM     51  C   THR A  14      22.704  34.822  19.585  1.00  0.00           C  
ATOM     52  O   THR A  14      23.635  35.310  18.954  1.00  0.00           O  
ATOM     53  N   LEU A  15      22.030  33.730  19.252  1.00  0.00           N  
ATOM     54  CA  LEU A  15      22.045  32.923  18.054  1.00  0.00           C  
ATOM     55  C   LEU A  15      20.587  32.668  17.656  1.00  0.00           C  
ATOM     56  O   LEU A  15      19.790  32.215  18.464  1.00  0.00           O  
ATOM     57  N   GLU A  16      20.224  33.091  16.439  1.00  0.00           N  
ATOM     58  CA  GLU A  16      18.911  32.722  15.967  1.00  0.00           C  
ATOM     59  C   GLU A  16      18.952  31.351  15.302  1.00  0.00           C  
ATOM     60  O   GLU A  16      19.861  31.113  14.509  1.00  0.00           O  
ATOM     61  N   VAL A  17      17.991  30.491  15.628  1.00  0.00           N  
ATOM     62  CA  VAL A  17      17.954  29.129  15.126  1.00  0.00           C  
ATOM     63  C   VAL A  17      16.525  28.775  14.729  1.00  0.00           C  
ATOM     64  O   VAL A  17      15.663  29.610  14.986  1.00  0.00           O  
ATOM     65  N   GLU A  18      16.286  27.642  14.061  1.00  0.00           N  
ATOM     66  CA  GLU A  18      15.033  26.946  13.884  1.00  0.00           C  
ATOM     67  C   GLU A  18      15.190  25.631  14.654  1.00  0.00           C  
ATOM     68  O   GLU A  18      16.321  25.196  14.855  1.00  0.00           O  
ATOM     69  N   PRO A  19      14.160  24.913  15.072  1.00  0.00           N  
ATOM     70  CA  PRO A  19      14.310  23.644  15.759  1.00  0.00           C  
ATOM     71  C   PRO A  19      14.820  22.460  14.937  1.00  0.00           C  
ATOM     72  O   PRO A  19      15.378  21.522  15.507  1.00  0.00           O  
ATOM     73  N   SER A  20      14.519  22.524  13.643  1.00  0.00           N  
ATOM     74  CA  SER A  20      15.000  21.495  12.747  1.00  0.00           C  
ATOM     75  C   SER A  20      16.471  21.575  12.340  1.00  0.00           C  
ATOM     76  O   SER A  20      16.913  20.762  11.526  1.00  0.00           O  
ATOM     77  N   ASP A  21      17.220  22.517  12.894  1.00  0.00           N  
ATOM     78  CA  ASP A  21      18.527  22.964  12.432  1.00  0.00           C  
ATOM     79  C   ASP A  21      19.579  22.017  13.013  1.00  0.00           C  
ATOM     80  O   ASP A  21      19.524  21.693  14.197  1.00  0.00           O  
ATOM     81  N   THR A  22      20.601  21.682  12.233  1.00  0.00           N  
ATOM     82  CA  THR A  22      21.686  20.797  12.607  1.00  0.00           C  
ATOM     83  C   THR A  22      22.699  21.541  13.479  1.00  0.00           C  
ATOM     84  O   THR A  22      23.011  22.706  13.289  1.00  0.00           O  
ATOM     85  N   ILE A  23      23.219  20.872  14.506  1.00  0.00           N  
ATOM     86  CA  ILE A  23      24.313  21.365  15.317  1.00  0.00           C  
ATOM     87  C   ILE A  23      25.497  21.925  14.530  1.00  0.00           C  
ATOM     88  O   ILE A  23      26.085  22.905  14.984  1.00  0.00           O  
ATOM     89  N   GLU A  24      25.832  21.349  13.379  1.00  0.00           N  
ATOM     90  CA  GLU A  24      26.864  21.765  12.461  1.00  0.00           C  
ATOM     91  C   GLU A  24      26.690  23.234  12.065  1.00  0.00           C  
ATOM     92  O   GLU A  24      27.595  24.026  12.323  1.00  0.00           O  
ATOM     93  N   ASN A  25      25.512  23.686  11.657  1.00  0.00           N  
ATOM     94  CA  ASN A  25      25.042  24.999  11.295  1.00  0.00           C  
ATOM     95  C   ASN A  25      25.066  25.957  12.485  1.00  0.00           C  
ATOM     96  O   ASN A  25      25.564  27.078  12.412  1.00  0.00           O  
ATOM     97  N   VAL A  26      24.621  25.463  13.637  1.00  0.00           N  
ATOM     98  CA  VAL A  26      24.744  26.170  14.897  1.00  0.00           C  
ATOM     99  C   VAL A  26      26.166  26.637  15.192  1.00  0.00           C  
ATOM    100  O   VAL A  26      26.287  27.845  15.415  1.00  0.00           O  
ATOM    101  N   LYS A  27      27.154  25.753  15.096  1.00  0.00           N  
ATOM    102  CA  LYS A  27      28.573  25.999  15.272  1.00  0.00           C  
ATOM    103  C   LYS A  27      29.116  26.993  14.256  1.00  0.00           C  
ATOM    104  O   LYS A  27      29.906  27.870  14.612  1.00  0.00           O  
ATOM    105  N   ALA A  28      28.668  26.856  13.013  1.00  0.00           N  
ATOM    106  CA  ALA A  28      28.904  27.619  11.805  1.00  0.00           C  
ATOM    107  C   ALA A  28      28.473  29.071  12.033  1.00  0.00           C  
ATOM    108  O   ALA A  28      29.119  29.974  11.511  1.00  0.00           O  
ATOM    109  N   LYS A  29      27.371  29.373  12.703  1.00  0.00           N  
ATOM    110  CA  LYS A  29      26.918  30.709  13.056  1.00  0.00           C  
ATOM    111  C   LYS A  29      27.620  31.326  14.274  1.00  0.00           C  
ATOM    112  O   LYS A  29      27.672  32.546  14.445  1.00  0.00           O  
ATOM    113  N   ILE A  30      28.252  30.533  15.126  1.00  0.00           N  
ATOM    114  CA  ILE A  30      29.082  30.977  16.230  1.00  0.00           C  
ATOM    115  C   ILE A  30      30.424  31.426  15.643  1.00  0.00           C  
ATOM    116  O   ILE A  30      31.045  32.397  16.082  1.00  0.00           O  
ATOM    117  N   GLN A  31      30.922  30.840  14.566  1.00  0.00           N  
ATOM    118  CA  GLN A  31      31.974  31.299  13.674  1.00  0.00           C  
ATOM    119  C   GLN A  31      31.604  32.550  12.863  1.00  0.00           C  
ATOM    120  O   GLN A  31      32.516  33.360  12.716  1.00  0.00           O  
ATOM    121  N   ASP A  32      30.396  32.771  12.348  1.00  0.00           N  
ATOM    122  CA  ASP A  32      29.988  34.000  11.700  1.00  0.00           C  
ATOM    123  C   ASP A  32      29.941  35.138  12.733  1.00  0.00           C  
ATOM    124  O   ASP A  32      30.319  36.216  12.278  1.00  0.00           O  
ATOM    125  N   LYS A  33      29.796  34.891  14.031  1.00  0.00           N  
ATOM    126  CA  LYS A  33      29.758  35.892  15.071  1.00  0.00           C  
ATOM    127  C   LYS A  33      31.095  36.080  15.795  1.00  0.00           C  
ATOM    128  O   LYS A  33      31.753  37.112  15.661  1.00  0.00           O  
ATOM    129  N   GLU A  34      31.615  35.125  16.560  1.00  0.00           N  
ATOM    130  CA  GLU A  34      32.687  35.396  17.498  1.00  0.00           C  
ATOM    131  C   GLU A  34      33.975  34.708  17.009  1.00  0.00           C  
ATOM    132  O   GLU A  34      35.067  35.042  17.446  1.00  0.00           O  
ATOM    133  N   GLY A  35      33.854  33.859  15.990  1.00  0.00           N  
ATOM    134  CA  GLY A  35      34.964  33.498  15.146  1.00  0.00           C  
ATOM    135  C   GLY A  35      35.566  32.119  15.443  1.00  0.00           C  
ATOM    136  O   GLY A  35      36.520  31.752  14.777  1.00  0.00           O  
ATOM    137  N   ILE A  36      34.998  31.375  16.393  1.00  0.00           N  
ATOM    138  CA  ILE A  36      35.539  30.135  16.913  1.00  0.00           C  
ATOM    139  C   ILE A  36      35.261  29.040  15.889  1.00  0.00           C  
ATOM    140  O   ILE A  36      34.108  28.719  15.571  1.00  0.00           O  
ATOM    141  N   PRO A  37      36.244  28.287  15.398  1.00  0.00           N  
ATOM    142  CA  PRO A  37      36.066  27.218  14.439  1.00  0.00           C  
ATOM    143  C   PRO A  37      35.330  25.983  14.955  1.00  0.00           C  
ATOM    144  O   PRO A  37      35.731  25.586  16.040  1.00  0.00           O  
ATOM    145  N   PRO A  38      34.306  25.485  14.269  1.00  0.00           N  
ATOM    146  CA  PRO A  38      33.551  24.279  14.557  1.00  0.00           C  
ATOM    147  C   PRO A  38      34.338  23.040  15.002  1.00  0.00           C  
ATOM    148  O   PRO A  38      33.873  22.403  15.939  1.00  0.00           O  
ATOM    149  N   ASP A  39      35.558  22.891  14.479  1.00  0.00           N  
ATOM    150  CA  ASP A  39      36.600  21.916  14.709  1.00  0.00           C  
ATOM    151  C   ASP A  39      36.935  21.739  16.195  1.00  0.00           C  
ATOM    152  O   ASP A  39      36.736  20.676  16.778  1.00  0.00           O  
ATOM    153  N   GLN A  40      37.441  22.832  16.758  1.00  0.00           N  
ATOM    154  CA  GLN A  40      37.787  23.058  18.149  1.00  0.00           C  
ATOM    155  C   GLN A  40      36.642  23.242  19.139  1.00  0.00           C  
ATOM    156  O   GLN A  40      36.882  23.014  20.320  1.00  0.00           O  
ATOM    157  N   GLN A  41      35.487  23.712  18.672  1.00  0.00           N  
ATOM    158  CA  GLN A  41      34.282  24.023  19.415  1.00  0.00           C  
ATOM    159  C   GLN A  41      33.640  22.700  19.814  1.00  0.00           C  
ATOM    160  O   GLN A  41      33.189  21.997  18.914  1.00  0.00           O  
ATOM    161  N   ARG A  42      33.337  22.560  21.095  1.00  0.00           N  
ATOM    162  CA  ARG A  42      32.366  21.632  21.645  1.00  0.00           C  
ATOM    163  C   ARG A  42      31.297  22.436  22.397  1.00  0.00           C  
ATOM    164  O   ARG A  42      31.674  23.298  23.189  1.00  0.00           O  
ATOM    165  N   LEU A  43      30.009  22.230  22.154  1.00  0.00           N  
ATOM    166  CA  LEU A  43      28.914  22.866  22.860  1.00  0.00           C  
ATOM    167  C   LEU A  43      28.373  21.952  23.961  1.00  0.00           C  
ATOM    168  O   LEU A  43      28.525  20.747  23.792  1.00  0.00           O  
ATOM    169  N   ILE A  44      27.642  22.529  24.906  1.00  0.00           N  
ATOM    170  CA  ILE A  44      26.965  21.861  26.012  1.00  0.00           C  
ATOM    171  C   ILE A  44      25.561  22.459  26.140  1.00  0.00           C  
ATOM    172  O   ILE A  44      25.375  23.676  26.090  1.00  0.00           O  
ATOM    173  N   PHE A  45      24.608  21.557  26.367  1.00  0.00           N  
ATOM    174  CA  PHE A  45      23.267  21.793  26.867  1.00  0.00           C  
ATOM    175  C   PHE A  45      23.022  20.805  28.018  1.00  0.00           C  
ATOM    176  O   PHE A  45      23.048  19.594  27.810  1.00  0.00           O  
ATOM    177  N   ALA A  46      22.819  21.300  29.233  1.00  0.00           N  
ATOM    178  CA  ALA A  46      22.358  20.624  30.428  1.00  0.00           C  
ATOM    179  C   ALA A  46      23.231  19.445  30.854  1.00  0.00           C  
ATOM    180  O   ALA A  46      22.774  18.377  31.248  1.00  0.00           O  
ATOM    181  N   GLY A  47      24.530  19.602  30.609  1.00  0.00           N  
ATOM    182  CA  GLY A  47      25.620  18.676  30.823  1.00  0.00           C  
ATOM    183  C   GLY A  47      25.764  17.503  29.845  1.00  0.00           C  
ATOM    184  O   GLY A  47      26.688  16.703  29.984  1.00  0.00           O  
ATOM    185  N   LYS A  48      25.026  17.521  28.739  1.00  0.00           N  
ATOM    186  CA  LYS A  48      25.077  16.603  27.620  1.00  0.00           C  
ATOM    187  C   LYS A  48      25.921  17.274  26.529  1.00  0.00           C  
ATOM    188  O   LYS A  48      25.744  18.454  26.248  1.00  0.00           O  
ATOM    189  N   GLN A  49      26.836  16.521  25.933  1.00  0.00           N  
ATOM    190  CA  GLN A  49      27.688  16.881  24.819  1.00  0.00           C  
ATOM    191  C   GLN A  49      26.814  16.598  23.594  1.00  0.00           C  
ATOM    192  O   GLN A  49      26.279  15.500  23.492  1.00  0.00           O  
ATOM    193  N   LEU A  50      26.604  17.581  22.712  1.00  0.00           N  
ATOM    194  CA  LEU A  50      25.702  17.513  21.587  1.00  0.00           C  
ATOM    195  C   LEU A  50      26.313  16.647  20.483  1.00  0.00           C  
ATOM    196  O   LEU A  50      27.452  16.938  20.134  1.00  0.00           O  
ATOM    197  N   GLU A  51      25.615  15.669  19.917  1.00  0.00           N  
ATOM    198  CA  GLU A  51      26.205  14.637  19.082  1.00  0.00           C  
ATOM    199  C   GLU A  51      26.157  15.084  17.614  1.00  0.00           C  
ATOM    200  O   GLU A  51      25.074  15.264  17.059  1.00  0.00           O  
ATOM    201  N   ASP A  52      27.280  15.091  16.912  1.00  0.00           N  
ATOM    202  CA  ASP A  52      27.505  15.442  15.523  1.00  0.00           C  
ATOM    203  C   ASP A  52      26.471  14.798  14.599  1.00  0.00           C  
ATOM    204  O   ASP A  52      26.439  13.580  14.446  1.00  0.00           O  
ATOM    205  N   GLY A  53      25.631  15.579  13.928  1.00  0.00           N  
ATOM    206  CA  GLY A  53      24.695  15.119  12.914  1.00  0.00           C  
ATOM    207  C   GLY A  53      23.231  15.201  13.369  1.00  0.00           C  
ATOM    208  O   GLY A  53      22.370  15.139  12.486  1.00  0.00           O  
ATOM    209  N   ARG A  54      22.921  15.466  14.627  1.00  0.00           N  
ATOM    210  CA  ARG A  54      21.589  15.678  15.152  1.00  0.00           C  
ATOM    211  C   ARG A  54      21.157  17.140  15.005  1.00  0.00           C  
ATOM    212  O   ARG A  54      21.982  18.044  14.954  1.00  0.00           O  
ATOM    213  N   THR A  55      19.829  17.278  14.946  1.00  0.00           N  
ATOM    214  CA  THR A  55      19.102  18.501  15.205  1.00  0.00           C  
ATOM    215  C   THR A  55      19.029  18.986  16.660  1.00  0.00           C  
ATOM    216  O   THR A  55      19.168  18.133  17.531  1.00  0.00           O  
ATOM    217  N   LEU A  56      18.722  20.244  16.976  1.00  0.00           N  
ATOM    218  CA  LEU A  56      18.419  20.743  18.293  1.00  0.00           C  
ATOM    219  C   LEU A  56      17.119  20.189  18.879  1.00  0.00           C  
ATOM    220  O   LEU A  56      16.966  20.022  20.088  1.00  0.00           O  
ATOM    221  N   SER A  57      16.184  19.688  18.071  1.00  0.00           N  
ATOM    222  CA  SER A  57      14.981  19.036  18.549  1.00  0.00           C  
ATOM    223  C   SER A  57      15.349  17.623  18.996  1.00  0.00           C  
ATOM    224  O   SER A  57      14.575  17.093  19.798  1.00  0.00           O  
ATOM    225  N   ASP A  58      16.483  17.022  18.649  1.00  0.00           N  
ATOM    226  CA  ASP A  58      16.990  15.799  19.247  1.00  0.00           C  
ATOM    227  C   ASP A  58      17.620  16.014  20.627  1.00  0.00           C  
ATOM    228  O   ASP A  58      18.030  15.103  21.329  1.00  0.00           O  
ATOM    229  N   TYR A  59      17.597  17.206  21.209  1.00  0.00           N  
ATOM    230  CA  TYR A  59      18.204  17.619  22.462  1.00  0.00           C  
ATOM    231  C   TYR A  59      17.286  18.526  23.288  1.00  0.00           C  
ATOM    232  O   TYR A  59      17.697  18.904  24.382  1.00  0.00           O  
ATOM    233  N   ASN A  60      16.017  18.691  22.912  1.00  0.00           N  
ATOM    234  CA  ASN A  60      14.915  19.316  23.607  1.00  0.00           C  
ATOM    235  C   ASN A  60      15.061  20.810  23.928  1.00  0.00           C  
ATOM    236  O   ASN A  60      14.475  21.382  24.837  1.00  0.00           O  
ATOM    237  N   ILE A  61      15.860  21.461  23.082  1.00  0.00           N  
ATOM    238  CA  ILE A  61      16.192  22.863  23.226  1.00  0.00           C  
ATOM    239  C   ILE A  61      15.082  23.631  22.499  1.00  0.00           C  
ATOM    240  O   ILE A  61      14.788  23.375  21.333  1.00  0.00           O  
ATOM    241  N   GLN A  62      14.517  24.595  23.228  1.00  0.00           N  
ATOM    242  CA  GLN A  62      13.465  25.452  22.724  1.00  0.00           C  
ATOM    243  C   GLN A  62      13.931  26.897  22.892  1.00  0.00           C  
ATOM    244  O   GLN A  62      15.134  27.152  22.979  1.00  0.00           O  
ATOM    245  N   LYS A  63      12.986  27.825  22.879  1.00  0.00           N  
ATOM    246  CA  LYS A  63      13.222  29.257  22.731  1.00  0.00           C  
ATOM    247  C   LYS A  63      13.918  29.724  24.005  1.00  0.00           C  
ATOM    248  O   LYS A  63      13.550  29.315  25.104  1.00  0.00           O  
ATOM    249  N   GLU A  64      14.964  30.544  23.898  1.00  0.00           N  
ATOM    250  CA  GLU A  64      15.581  31.377  24.916  1.00  0.00           C  
ATOM    251  C   GLU A  64      16.572  30.654  25.836  1.00  0.00           C  
ATOM    252  O   GLU A  64      16.978  31.179  26.873  1.00  0.00           O  
ATOM    253  N   SER A  65      16.862  29.433  25.416  1.00  0.00           N  
ATOM    254  CA  SER A  65      17.733  28.516  26.122  1.00  0.00           C  
ATOM    255  C   SER A  65      19.206  28.934  26.097  1.00  0.00           C  
ATOM    256  O   SER A  65      19.676  29.591  25.174  1.00  0.00           O  
ATOM    257  N   THR A  66      19.931  28.525  27.128  1.00  0.00           N  
ATOM    258  CA  THR A  66      21.320  28.903  27.289  1.00  0.00           C  
ATOM    259  C   THR A  66      22.055  27.585  27.043  1.00  0.00           C  
ATOM    260  O   THR A  66      22.034  26.709  27.905  1.00  0.00           O  
ATOM    261  N   LEU A  67      22.986  27.636  26.103  1.00  0.00           N  
ATOM    262  CA  LEU A  67      23.967  26.608  25.821  1.00  0.00           C  
ATOM    263  C   LEU A  67      25.275  27.211  26.333  1.00  0.00           C  
ATOM    264  O   LEU A  67      25.460  28.427  26.399  1.00  0.00           O  
ATOM    265  N   HIS A  68      26.241  26.372  26.676  1.00  0.00           N  
ATOM    266  CA  HIS A  68      27.588  26.722  27.081  1.00  0.00           C  
ATOM    267  C   HIS A  68      28.527  26.260  25.961  1.00  0.00           C  
ATOM    268  O   HIS A  68      28.231  25.282  25.284  1.00  0.00           O  
ATOM    269  N   LEU A  69      29.673  26.900  25.732  1.00  0.00           N  
ATOM    270  CA  LEU A  69      30.693  26.573  24.749  1.00  0.00           C  
ATOM    271  C   LEU A  69      32.052  26.436  25.437  1.00  0.00           C  
ATOM    272  O   LEU A  69      32.428  27.243  26.291  1.00  0.00           O  
ATOM    273  N   VAL A  70      32.793  25.396  25.075  1.00  0.00           N  
ATOM    274  CA  VAL A  70      34.077  24.993  25.603  1.00  0.00           C  
ATOM    275  C   VAL A  70      34.983  24.630  24.422  1.00  0.00           C  
ATOM    276  O   VAL A  70      34.567  24.041  23.425  1.00  0.00           O  
TER
ENDMDL
MODEL      6
ATOM      1  N   GLN A   2      15.017  31.934  19.004  1.00  0.00           N  
ATOM      2  CA  GLN A   2      16.058  32.811  19.511  1.00  0.00           C  
ATOM      3  C   GLN A   2      16.547  32.032  20.729  1.00  0.00           C  
ATOM      4  O   GLN A   2      15.726  31.817  21.618  1.00  0.00           O  
ATOM      5  N   ILE A   3      17.848  31.775  20.918  1.00  0.00           N  
ATOM      6  CA  ILE A   3      18.506  31.076  22.004  1.00  0.00           C  
ATOM      7  C   ILE A   3      19.775  31.874  22.343  1.00  0.00           C  
ATOM      8  O   ILE A   3      20.097  32.761  21.562  1.00  0.00           O  
ATOM      9  N   PHE A   4      20.503  31.592  23.410  1.00  0.00           N  
ATOM     10  CA  PHE A   4      21.733  32.273  23.740  1.00  0.00           C  
ATOM     11  C   PHE A   4      22.830  31.208  23.618  1.00  0.00           C  
ATOM     12  O   PHE A   4      22.580  30.045  23.911  1.00  0.00           O  
ATOM     13  N   VAL A   5      24.064  31.568  23.253  1.00  0.00           N  
ATOM     14  CA  VAL A   5      25.275  30.799  23.452  1.00  0.00           C  
ATOM     15  C   VAL A   5      26.207  31.679  24.275  1.00  0.00           C  
ATOM     16  O   VAL A   5      26.508  32.822  23.928  1.00  0.00           O  
ATOM     17  N   LYS A   6      26.520  31.050  25.405  1.00  0.00           N  
ATOM     18  CA  LYS A   6      27.389  31.683  26.376  1.00  0.00           C  
ATOM     19  C   LYS A   6      28.735  30.978  26.424  1.00  0.00           C  
ATOM     20  O   LYS A   6      29.038  30.210  25.511  1.00  0.00           O  
ATOM     21  N   THR A   7      29.692  31.427  27.236  1.00  0.00           N  
ATOM     22  CA  THR A   7      31.095  31.048  27.269  1.00  0.00           C  
ATOM     23  C   THR A   7      31.523  30.901  28.724  1.00  0.00           C  
ATOM     24  O   THR A   7      30.892  31.487  29.599  1.00  0.00           O  
ATOM     25  N   LEU A   8      32.550  30.145  29.107  1.00  0.00           N  
ATOM     26  CA  LEU A   8      32.920  30.118  30.509  1.00  0.00           C  
ATOM     27  C   LEU A   8      33.660  31.393  30.911  1.00  0.00           C  
ATOM     28  O   LEU A   8      33.698  31.562  32.132  1.00  0.00           O  
ATOM     29  N   THR A   9      34.184  32.287  30.087  1.00  0.00           N  
ATOM     30  CA  THR A   9      34.843  33.520  30.493  1.00  0.00           C  
ATOM     31  C   THR A   9      33.816  34.646  30.507  1.00  0.00           C  
ATOM     32  O   THR A   9      34.085  35.684  31.113  1.00  0.00           O  
ATOM     33  N   GLY A  10      32.578  34.398  30.098  1.00  0.00           N  
ATOM     34  CA  GLY A  10      31.387  35.179  30.342  1.00  0.00           C  
ATOM     35  C   GLY A  10      30.744  35.981  29.209  1.00  0.00           C  
ATOM     36  O   GLY A  10      29.985  36.913  29.468  1.00  0.00           O  
ATOM     37  N   LYS A  11      31.195  35.852  27.957  1.00  0.00           N  
ATOM     38  CA  LYS A  11      30.492  36.397  26.824  1.00  0.00           C  
ATOM     39  C   LYS A  11      29.107  35.754  26.747  1.00  0.00           C  
ATOM     40  O   LYS A  11      29.007  34.578  27.102  1.00  0.00           O  
ATOM     41  N   THR A  12      28.132  36.435  26.150  1.00  0.00           N  
ATOM     42  CA  THR A  12      26.818  35.930  25.800  1.00  0.00           C  
ATOM     43  C   THR A  12      26.408  36.521  24.453  1.00  0.00           C  
ATOM     44  O   THR A  12      25.928  37.644  24.326  1.00  0.00           O  
ATOM     45  N   ILE A  13      26.461  35.618  23.475  1.00  0.00           N  
ATOM     46  CA  ILE A  13      26.055  35.824  22.100  1.00  0.00           C  
ATOM     47  C   ILE A  13      24.665  35.199  21.964  1.00  0.00           C  
ATOM     48  O   ILE A  13      24.308  34.173  22.527  1.00  0.00           O  
ATOM     49  N   THR A  14      23.832  35.885  21.177  1.00  0.00           N  
ATOM     50  CA  THR A  14      22.485  35.442  20.879  1.00  0.00           C  
ATOM     51  C   THR A  14      22.428  34.651  19.574  1.00  0.00           C  
ATOM     52  O   THR A  14      23.171  35.010  18.652  1.00  0.00           O  
ATOM     53  N   LEU A  15      21.635  33.609  19.408  1.00  0.00           N  
ATOM     54  CA  LEU A  15      21.648  32.736  18.239  1.00  0.00           C  
ATOM     55  C   LEU A  15      20.217  32.666  17.688  1.00  0.00           C  
ATOM     56  O   LEU A  15      19.307  32.270  18.413  1.00  0.00           O  
ATOM     57  N   GLU A  16      20.027  33.014  16.419  1.00  0.00           N  
ATOM     58  CA  GLU A  16      18.765  32.924  15.702  1.00  0.00           C  
ATOM     59  C   GLU A  16      19.054  31.611  14.970  1.00  0.00           C  
ATOM     60  O   GLU A  16      19.967  31.507  14.154  1.00  0.00           O  
ATOM     61  N   VAL A  17      18.382  30.534  15.343  1.00  0.00           N  
ATOM     62  CA  VAL A  17      18.416  29.239  14.684  1.00  0.00           C  
ATOM     63  C   VAL A  17      17.000  28.917  14.200  1.00  0.00           C  
ATOM     64  O   VAL A  17      16.015  29.314  14.815  1.00  0.00           O  
ATOM     65  N   GLU A  18      16.913  28.162  13.113  1.00  0.00           N  
ATOM     66  CA  GLU A  18      15.674  27.586  12.610  1.00  0.00           C  
ATOM     67  C   GLU A  18      15.419  26.205  13.224  1.00  0.00           C  
ATOM     68  O   GLU A  18      16.396  25.611  13.653  1.00  0.00           O  
ATOM     69  N   PRO A  19      14.224  25.626  13.228  1.00  0.00           N  
ATOM     70  CA  PRO A  19      13.960  24.337  13.842  1.00  0.00           C  
ATOM     71  C   PRO A  19      14.464  23.187  12.976  1.00  0.00           C  
ATOM     72  O   PRO A  19      14.791  22.134  13.511  1.00  0.00           O  
ATOM     73  N   SER A  20      14.700  23.358  11.679  1.00  0.00           N  
ATOM     74  CA  SER A  20      15.292  22.428  10.733  1.00  0.00           C  
ATOM     75  C   SER A  20      16.793  22.277  10.955  1.00  0.00           C  
ATOM     76  O   SER A  20      17.344  21.334  10.383  1.00  0.00           O  
ATOM     77  N   ASP A  21      17.431  23.205  11.662  1.00  0.00           N  
ATOM     78  CA  ASP A  21      18.876  23.256  11.835  1.00  0.00           C  
ATOM     79  C   ASP A  21      19.387  22.120  12.715  1.00  0.00           C  
ATOM     80  O   ASP A  21      19.021  21.904  13.871  1.00  0.00           O  
ATOM     81  N   THR A  22      20.321  21.393  12.097  1.00  0.00           N  
ATOM     82  CA  THR A  22      21.209  20.524  12.831  1.00  0.00           C  
ATOM     83  C   THR A  22      22.302  21.351  13.526  1.00  0.00           C  
ATOM     84  O   THR A  22      22.489  22.515  13.201  1.00  0.00           O  
ATOM     85  N   ILE A  23      22.994  20.700  14.452  1.00  0.00           N  
ATOM     86  CA  ILE A  23      24.050  21.309  15.232  1.00  0.00           C  
ATOM     87  C   ILE A  23      25.208  21.658  14.298  1.00  0.00           C  
ATOM     88  O   ILE A  23      26.052  22.474  14.644  1.00  0.00           O  
ATOM     89  N   GLU A  24      25.313  21.024  13.132  1.00  0.00           N  
ATOM     90  CA  GLU A  24      26.296  21.361  12.121  1.00  0.00           C  
ATOM     91  C   GLU A  24      26.016  22.653  11.360  1.00  0.00           C  
ATOM     92  O   GLU A  24      26.926  23.401  11.035  1.00  0.00           O  
ATOM     93  N   ASN A  25      24.739  22.996  11.237  1.00  0.00           N  
ATOM     94  CA  ASN A  25      24.299  24.275  10.726  1.00  0.00           C  
ATOM     95  C   ASN A  25      24.500  25.263  11.878  1.00  0.00           C  
ATOM     96  O   ASN A  25      24.824  26.425  11.620  1.00  0.00           O  
ATOM     97  N   VAL A  26      24.412  24.864  13.141  1.00  0.00           N  
ATOM     98  CA  VAL A  26      24.411  25.815  14.245  1.00  0.00           C  
ATOM     99  C   VAL A  26      25.869  26.162  14.555  1.00  0.00           C  
ATOM    100  O   VAL A  26      26.140  27.302  14.917  1.00  0.00           O  
ATOM    101  N   LYS A  27      26.772  25.230  14.269  1.00  0.00           N  
ATOM    102  CA  LYS A  27      28.190  25.375  14.500  1.00  0.00           C  
ATOM    103  C   LYS A  27      28.688  26.427  13.507  1.00  0.00           C  
ATOM    104  O   LYS A  27      29.401  27.330  13.943  1.00  0.00           O  
ATOM    105  N   ALA A  28      28.267  26.431  12.243  1.00  0.00           N  
ATOM    106  CA  ALA A  28      28.479  27.337  11.133  1.00  0.00           C  
ATOM    107  C   ALA A  28      28.017  28.770  11.398  1.00  0.00           C  
ATOM    108  O   ALA A  28      28.713  29.728  11.089  1.00  0.00           O  
ATOM    109  N   LYS A  29      26.886  28.903  12.094  1.00  0.00           N  
ATOM    110  CA  LYS A  29      26.424  30.200  12.537  1.00  0.00           C  
ATOM    111  C   LYS A  29      27.151  30.758  13.755  1.00  0.00           C  
ATOM    112  O   LYS A  29      27.442  31.930  13.977  1.00  0.00           O  
ATOM    113  N   ILE A  30      27.504  29.936  14.744  1.00  0.00           N  
ATOM    114  CA  ILE A  30      28.287  30.263  15.921  1.00  0.00           C  
ATOM    115  C   ILE A  30      29.641  30.727  15.402  1.00  0.00           C  
ATOM    116  O   ILE A  30      30.237  31.636  15.981  1.00  0.00           O  
ATOM    117  N   GLN A  31      30.108  30.112  14.319  1.00  0.00           N  
ATOM    118  CA  GLN A  31      31.334  30.431  13.616  1.00  0.00           C  
ATOM    119  C   GLN A  31      31.189  31.779  12.910  1.00  0.00           C  
ATOM    120  O   GLN A  31      32.142  32.557  12.915  1.00  0.00           O  
ATOM    121  N   ASP A  32      29.986  32.104  12.450  1.00  0.00           N  
ATOM    122  CA  ASP A  32      29.803  33.363  11.760  1.00  0.00           C  
ATOM    123  C   ASP A  32      30.000  34.528  12.735  1.00  0.00           C  
ATOM    124  O   ASP A  32      30.663  35.515  12.420  1.00  0.00           O  
ATOM    125  N   LYS A  33      29.629  34.271  13.984  1.00  0.00           N  
ATOM    126  CA  LYS A  33      29.450  35.238  15.047  1.00  0.00           C  
ATOM    127  C   LYS A  33      30.701  35.468  15.893  1.00  0.00           C  
ATOM    128  O   LYS A  33      30.886  36.601  16.335  1.00  0.00           O  
ATOM    129  N   GLU A  34      31.497  34.434  16.159  1.00  0.00           N  
ATOM    130  CA  GLU A  34      32.634  34.497  17.055  1.00  0.00           C  
ATOM    131  C   GLU A  34      33.946  33.956  16.480  1.00  0.00           C  
ATOM    132  O   GLU A  34      34.992  34.224  17.057  1.00  0.00           O  
ATOM    133  N   GLY A  35      33.779  33.084  15.487  1.00  0.00           N  
ATOM    134  CA  GLY A  35      34.885  32.714  14.639  1.00  0.00           C  
ATOM    135  C   GLY A  35      35.586  31.393  14.964  1.00  0.00           C  
ATOM    136  O   GLY A  35      36.624  31.116  14.374  1.00  0.00           O  
ATOM    137  N   ILE A  36      35.143  30.630  15.960  1.00  0.00           N  
ATOM    138  CA  ILE A  36      35.785  29.392  16.346  1.00  0.00           C  
ATOM    139  C   ILE A  36      35.526  28.295  15.315  1.00  0.00           C  
ATOM    140  O   ILE A  36      34.378  27.980  15.013  1.00  0.00           O  
ATOM    141  N   PRO A  37      36.551  27.695  14.700  1.00  0.00           N  
ATOM    142  CA  PRO A  37      36.398  26.476  13.944  1.00  0.00           C  
ATOM    143  C   PRO A  37      35.460  25.382  14.469  1.00  0.00           C  
ATOM    144  O   PRO A  37      35.573  24.987  15.625  1.00  0.00           O  
ATOM    145  N   PRO A  38      34.514  24.816  13.727  1.00  0.00           N  
ATOM    146  CA  PRO A  38      33.584  23.756  14.076  1.00  0.00           C  
ATOM    147  C   PRO A  38      34.196  22.530  14.761  1.00  0.00           C  
ATOM    148  O   PRO A  38      33.606  21.867  15.624  1.00  0.00           O  
ATOM    149  N   ASP A  39      35.448  22.254  14.434  1.00  0.00           N  
ATOM    150  CA  ASP A  39      36.278  21.166  14.916  1.00  0.00           C  
ATOM    151  C   ASP A  39      36.863  21.449  16.304  1.00  0.00           C  
ATOM    152  O   ASP A  39      37.514  20.581  16.886  1.00  0.00           O  
ATOM    153  N   GLN A  40      36.617  22.647  16.827  1.00  0.00           N  
ATOM    154  CA  GLN A  40      37.137  23.166  18.082  1.00  0.00           C  
ATOM    155  C   GLN A  40      35.990  23.468  19.049  1.00  0.00           C  
ATOM    156  O   GLN A  40      36.291  23.705  20.214  1.00  0.00           O  
ATOM    157  N   GLN A  41      34.752  23.543  18.574  1.00  0.00           N  
ATOM    158  CA  GLN A  41      33.738  24.044  19.491  1.00  0.00           C  
ATOM    159  C   GLN A  41      33.148  22.856  20.246  1.00  0.00           C  
ATOM    160  O   GLN A  41      32.650  21.935  19.594  1.00  0.00           O  
ATOM    161  N   ARG A  42      33.367  22.835  21.554  1.00  0.00           N  
ATOM    162  CA  ARG A  42      32.732  21.907  22.477  1.00  0.00           C  
ATOM    163  C   ARG A  42      31.696  22.821  23.131  1.00  0.00           C  
ATOM    164  O   ARG A  42      31.885  23.986  23.482  1.00  0.00           O  
ATOM    165  N   LEU A  43      30.453  22.347  23.152  1.00  0.00           N  
ATOM    166  CA  LEU A  43      29.222  23.072  23.374  1.00  0.00           C  
ATOM    167  C   LEU A  43      28.427  22.263  24.402  1.00  0.00           C  
ATOM    168  O   LEU A  43      27.640  21.413  23.984  1.00  0.00           O  
ATOM    169  N   ILE A  44      28.517  22.541  25.694  1.00  0.00           N  
ATOM    170  CA  ILE A  44      27.898  21.810  26.775  1.00  0.00           C  
ATOM    171  C   ILE A  44      26.526  22.462  26.965  1.00  0.00           C  
ATOM    172  O   ILE A  44      26.425  23.674  27.147  1.00  0.00           O  
ATOM    173  N   PHE A  45      25.518  21.601  26.959  1.00  0.00           N  
ATOM    174  CA  PHE A  45      24.140  21.810  27.376  1.00  0.00           C  
ATOM    175  C   PHE A  45      23.805  20.675  28.343  1.00  0.00           C  
ATOM    176  O   PHE A  45      23.674  19.543  27.897  1.00  0.00           O  
ATOM    177  N   ALA A  46      23.684  20.928  29.645  1.00  0.00           N  
ATOM    178  CA  ALA A  46      23.428  20.033  30.761  1.00  0.00           C  
ATOM    179  C   ALA A  46      24.441  18.925  31.028  1.00  0.00           C  
ATOM    180  O   ALA A  46      24.160  17.918  31.675  1.00  0.00           O  
ATOM    181  N   GLY A  47      25.636  19.064  30.448  1.00  0.00           N  
ATOM    182  CA  GLY A  47      26.720  18.101  30.473  1.00  0.00           C  
ATOM    183  C   GLY A  47      26.791  17.331  29.152  1.00  0.00           C  
ATOM    184  O   GLY A  47      27.804  16.694  28.895  1.00  0.00           O  
ATOM    185  N   LYS A  48      25.759  17.417  28.314  1.00  0.00           N  
ATOM    186  CA  LYS A  48      25.655  16.826  26.996  1.00  0.00           C  
ATOM    187  C   LYS A  48      26.355  17.803  26.052  1.00  0.00           C  
ATOM    188  O   LYS A  48      25.879  18.883  25.720  1.00  0.00           O  
ATOM    189  N   GLN A  49      27.547  17.349  25.667  1.00  0.00           N  
ATOM    190  CA  GLN A  49      28.194  17.677  24.419  1.00  0.00           C  
ATOM    191  C   GLN A  49      27.422  17.253  23.170  1.00  0.00           C  
ATOM    192  O   GLN A  49      27.374  16.055  22.882  1.00  0.00           O  
ATOM    193  N   LEU A  50      26.882  18.274  22.518  1.00  0.00           N  
ATOM    194  CA  LEU A  50      25.968  18.140  21.399  1.00  0.00           C  
ATOM    195  C   LEU A  50      26.735  17.507  20.236  1.00  0.00           C  
ATOM    196  O   LEU A  50      27.698  18.123  19.815  1.00  0.00           O  
ATOM    197  N   GLU A  51      26.230  16.374  19.742  1.00  0.00           N  
ATOM    198  CA  GLU A  51      26.901  15.675  18.668  1.00  0.00           C  
ATOM    199  C   GLU A  51      26.443  16.188  17.300  1.00  0.00           C  
ATOM    200  O   GLU A  51      25.266  16.339  16.980  1.00  0.00           O  
ATOM    201  N   ASP A  52      27.465  16.466  16.485  1.00  0.00           N  
ATOM    202  CA  ASP A  52      27.427  17.007  15.141  1.00  0.00           C  
ATOM    203  C   ASP A  52      26.491  16.212  14.235  1.00  0.00           C  
ATOM    204  O   ASP A  52      26.534  15.022  13.922  1.00  0.00           O  
ATOM    205  N   GLY A  53      25.470  16.899  13.718  1.00  0.00           N  
ATOM    206  CA  GLY A  53      24.429  16.357  12.866  1.00  0.00           C  
ATOM    207  C   GLY A  53      23.023  16.187  13.426  1.00  0.00           C  
ATOM    208  O   GLY A  53      22.070  16.076  12.664  1.00  0.00           O  
ATOM    209  N   ARG A  54      22.910  16.159  14.755  1.00  0.00           N  
ATOM    210  CA  ARG A  54      21.588  16.036  15.333  1.00  0.00           C  
ATOM    211  C   ARG A  54      20.891  17.395  15.429  1.00  0.00           C  
ATOM    212  O   ARG A  54      21.509  18.388  15.055  1.00  0.00           O  
ATOM    213  N   THR A  55      19.636  17.497  15.855  1.00  0.00           N  
ATOM    214  CA  THR A  55      18.952  18.770  15.834  1.00  0.00           C  
ATOM    215  C   THR A  55      18.646  19.247  17.255  1.00  0.00           C  
ATOM    216  O   THR A  55      18.757  18.470  18.199  1.00  0.00           O  
ATOM    217  N   LEU A  56      18.358  20.527  17.448  1.00  0.00           N  
ATOM    218  CA  LEU A  56      17.892  21.188  18.651  1.00  0.00           C  
ATOM    219  C   LEU A  56      16.919  20.404  19.531  1.00  0.00           C  
ATOM    220  O   LEU A  56      17.050  20.205  20.739  1.00  0.00           O  
ATOM    221  N   SER A  57      15.923  19.937  18.784  1.00  0.00           N  
ATOM    222  CA  SER A  57      14.758  19.195  19.217  1.00  0.00           C  
ATOM    223  C   SER A  57      15.040  17.702  19.419  1.00  0.00           C  
ATOM    224  O   SER A  57      14.251  17.004  20.052  1.00  0.00           O  
ATOM    225  N   ASP A  58      16.247  17.195  19.210  1.00  0.00           N  
ATOM    226  CA  ASP A  58      16.645  15.852  19.570  1.00  0.00           C  
ATOM    227  C   ASP A  58      17.363  15.884  20.913  1.00  0.00           C  
ATOM    228  O   ASP A  58      17.371  14.894  21.641  1.00  0.00           O  
ATOM    229  N   TYR A  59      17.865  17.023  21.382  1.00  0.00           N  
ATOM    230  CA  TYR A  59      18.339  17.273  22.730  1.00  0.00           C  
ATOM    231  C   TYR A  59      17.380  17.986  23.675  1.00  0.00           C  
ATOM    232  O   TYR A  59      17.640  18.126  24.868  1.00  0.00           O  
ATOM    233  N   ASN A  60      16.347  18.638  23.141  1.00  0.00           N  
ATOM    234  CA  ASN A  60      15.290  19.445  23.724  1.00  0.00           C  
ATOM    235  C   ASN A  60      15.877  20.797  24.125  1.00  0.00           C  
ATOM    236  O   ASN A  60      15.642  21.363  25.187  1.00  0.00           O  
ATOM    237  N   ILE A  61      16.713  21.352  23.247  1.00  0.00           N  
ATOM    238  CA  ILE A  61      16.945  22.789  23.235  1.00  0.00           C  
ATOM    239  C   ILE A  61      15.656  23.468  22.772  1.00  0.00           C  
ATOM    240  O   ILE A  61      15.315  23.481  21.586  1.00  0.00           O  
ATOM    241  N   GLN A  62      14.984  24.081  23.735  1.00  0.00           N  
ATOM    242  CA  GLN A  62      13.892  25.031  23.742  1.00  0.00           C  
ATOM    243  C   GLN A  62      14.356  26.454  23.391  1.00  0.00           C  
ATOM    244  O   GLN A  62      15.547  26.743  23.423  1.00  0.00           O  
ATOM    245  N   LYS A  63      13.412  27.368  23.165  1.00  0.00           N  
ATOM    246  CA  LYS A  63      13.682  28.770  22.937  1.00  0.00           C  
ATOM    247  C   LYS A  63      14.198  29.519  24.165  1.00  0.00           C  
ATOM    248  O   LYS A  63      13.935  29.105  25.288  1.00  0.00           O  
ATOM    249  N   GLU A  64      15.029  30.527  23.880  1.00  0.00           N  
ATOM    250  CA  GLU A  64      15.712  31.358  24.846  1.00  0.00           C  
ATOM    251  C   GLU A  64      16.613  30.661  25.861  1.00  0.00           C  
ATOM    252  O   GLU A  64      17.078  31.259  26.824  1.00  0.00           O  
ATOM    253  N   SER A  65      16.942  29.386  25.637  1.00  0.00           N  
ATOM    254  CA  SER A  65      17.808  28.550  26.433  1.00  0.00           C  
ATOM    255  C   SER A  65      19.261  28.862  26.053  1.00  0.00           C  
ATOM    256  O   SER A  65      19.531  29.566  25.088  1.00  0.00           O  
ATOM    257  N   THR A  66      20.166  28.317  26.867  1.00  0.00           N  
ATOM    258  CA  THR A  66      21.490  28.863  27.072  1.00  0.00           C  
ATOM    259  C   THR A  66      22.467  27.700  27.232  1.00  0.00           C  
ATOM    260  O   THR A  66      22.285  26.803  28.040  1.00  0.00           O  
ATOM    261  N   LEU A  67      23.590  27.735  26.510  1.00  0.00           N  
ATOM    262  CA  LEU A  67      24.589  26.692  26.459  1.00  0.00           C  
ATOM    263  C   LEU A  67      25.996  27.279  26.415  1.00  0.00           C  
ATOM    264  O   LEU A  67      26.213  28.245  25.680  1.00  0.00           O  
ATOM    265  N   HIS A  68      26.974  26.623  27.030  1.00  0.00           N  
ATOM    266  CA  HIS A  68      28.297  27.178  27.233  1.00  0.00           C  
ATOM    267  C   HIS A  68      29.198  26.651  26.113  1.00  0.00           C  
ATOM    268  O   HIS A  68      29.377  25.444  25.944  1.00  0.00           O  
ATOM    269  N   LEU A  69      29.738  27.523  25.277  1.00  0.00           N  
ATOM    270  CA  LEU A  69      30.770  27.255  24.298  1.00  0.00           C  
ATOM    271  C   LEU A  69      32.161  27.353  24.937  1.00  0.00           C  
ATOM    272  O   LEU A  69      32.439  28.351  25.597  1.00  0.00           O  
ATOM    273  N   VAL A  70      32.955  26.312  24.733  1.00  0.00           N  
ATOM    274  CA  VAL A  70      34.327  26.043  25.141  1.00  0.00           C  
ATOM    275  C   VAL A  70      35.097  25.494  23.939  1.00  0.00           C  
ATOM    276  O   VAL A  70      34.505  24.849  23.062  1.00  0.00           O  
TER
ENDMDL
MODEL      7
ATOM      1  N   GLN A   2      15.370  32.462  18.961  1.00  0.00           N  
ATOM      2  CA  GLN A   2      16.709  32.745  19.450  1.00  0.00           C  
ATOM      3  C   GLN A   2      17.283  31.666  20.366  1.00  0.00           C  
ATOM      4  O   GLN A   2      16.617  30.935  21.102  1.00  0.00           O  
ATOM      5  N   ILE A   3      18.612  31.553  20.377  1.00  0.00           N  
ATOM      6  CA  ILE A   3      19.470  30.854  21.299  1.00  0.00           C  
ATOM      7  C   ILE A   3      20.594  31.843  21.606  1.00  0.00           C  
ATOM      8  O   ILE A   3      21.101  32.604  20.774  1.00  0.00           O  
ATOM      9  N   PHE A   4      20.880  31.845  22.901  1.00  0.00           N  
ATOM     10  CA  PHE A   4      21.993  32.391  23.651  1.00  0.00           C  
ATOM     11  C   PHE A   4      22.981  31.237  23.799  1.00  0.00           C  
ATOM     12  O   PHE A   4      22.588  30.283  24.474  1.00  0.00           O  
ATOM     13  N   VAL A   5      24.230  31.309  23.345  1.00  0.00           N  
ATOM     14  CA  VAL A   5      25.246  30.322  23.643  1.00  0.00           C  
ATOM     15  C   VAL A   5      26.258  31.161  24.431  1.00  0.00           C  
ATOM     16  O   VAL A   5      26.685  32.279  24.123  1.00  0.00           O  
ATOM     17  N   LYS A   6      26.668  30.637  25.586  1.00  0.00           N  
ATOM     18  CA  LYS A   6      27.563  31.187  26.581  1.00  0.00           C  
ATOM     19  C   LYS A   6      28.979  30.719  26.214  1.00  0.00           C  
ATOM     20  O   LYS A   6      29.261  29.553  26.434  1.00  0.00           O  
ATOM     21  N   THR A   7      29.915  31.608  25.881  1.00  0.00           N  
ATOM     22  CA  THR A   7      31.312  31.249  25.686  1.00  0.00           C  
ATOM     23  C   THR A   7      31.982  31.006  27.026  1.00  0.00           C  
ATOM     24  O   THR A   7      31.524  31.593  28.009  1.00  0.00           O  
ATOM     25  N   LEU A   8      33.137  30.347  27.088  1.00  0.00           N  
ATOM     26  CA  LEU A   8      33.805  29.941  28.313  1.00  0.00           C  
ATOM     27  C   LEU A   8      34.342  31.201  28.993  1.00  0.00           C  
ATOM     28  O   LEU A   8      34.348  31.310  30.213  1.00  0.00           O  
ATOM     29  N   THR A   9      34.813  32.152  28.187  1.00  0.00           N  
ATOM     30  CA  THR A   9      35.396  33.420  28.582  1.00  0.00           C  
ATOM     31  C   THR A   9      34.412  34.535  28.942  1.00  0.00           C  
ATOM     32  O   THR A   9      34.809  35.511  29.569  1.00  0.00           O  
ATOM     33  N   GLY A  10      33.115  34.287  28.818  1.00  0.00           N  
ATOM     34  CA  GLY A  10      32.082  35.067  29.470  1.00  0.00           C  
ATOM     35  C   GLY A  10      31.233  35.974  28.583  1.00  0.00           C  
ATOM     36  O   GLY A  10      30.504  36.819  29.096  1.00  0.00           O  
ATOM     37  N   LYS A  11      31.160  35.745  27.273  1.00  0.00           N  
ATOM     38  CA  LYS A  11      30.294  36.462  26.355  1.00  0.00           C  
ATOM     39  C   LYS A  11      29.175  35.493  25.971  1.00  0.00           C  
ATOM     40  O   LYS A  11      29.169  34.278  26.148  1.00  0.00           O  
ATOM     41  N   THR A  12      28.054  36.045  25.520  1.00  0.00           N  
ATOM     42  CA  THR A  12      26.756  35.472  25.207  1.00  0.00           C  
ATOM     43  C   THR A  12      26.338  35.929  23.806  1.00  0.00           C  
ATOM     44  O   THR A  12      25.873  37.053  23.665  1.00  0.00           O  
ATOM     45  N   ILE A  13      26.724  35.066  22.869  1.00  0.00           N  
ATOM     46  CA  ILE A  13      26.537  35.283  21.442  1.00  0.00           C  
ATOM     47  C   ILE A  13      25.081  34.919  21.183  1.00  0.00           C  
ATOM     48  O   ILE A  13      24.743  33.752  21.340  1.00  0.00           O  
ATOM     49  N   THR A  14      24.199  35.862  20.842  1.00  0.00           N  
ATOM     50  CA  THR A  14      22.832  35.635  20.449  1.00  0.00           C  
ATOM     51  C   THR A  14      22.682  35.349  18.953  1.00  0.00           C  
ATOM     52  O   THR A  14      22.685  36.276  18.140  1.00  0.00           O  
ATOM     53  N   LEU A  15      22.393  34.078  18.692  1.00  0.00           N  
ATOM     54  CA  LEU A  15      22.080  33.542  17.389  1.00  0.00           C  
ATOM     55  C   LEU A  15      20.573  33.408  17.146  1.00  0.00           C  
ATOM     56  O   LEU A  15      19.812  33.420  18.112  1.00  0.00           O  
ATOM     57  N   GLU A  16      20.223  33.226  15.882  1.00  0.00           N  
ATOM     58  CA  GLU A  16      18.924  32.715  15.491  1.00  0.00           C  
ATOM     59  C   GLU A  16      19.134  31.335  14.863  1.00  0.00           C  
ATOM     60  O   GLU A  16      20.095  30.961  14.199  1.00  0.00           O  
ATOM     61  N   VAL A  17      18.129  30.495  15.100  1.00  0.00           N  
ATOM     62  CA  VAL A  17      17.928  29.116  14.703  1.00  0.00           C  
ATOM     63  C   VAL A  17      16.438  28.935  14.407  1.00  0.00           C  
ATOM     64  O   VAL A  17      15.590  29.796  14.626  1.00  0.00           O  
ATOM     65  N   GLU A  18      16.184  27.689  14.009  1.00  0.00           N  
ATOM     66  CA  GLU A  18      14.971  26.897  14.079  1.00  0.00           C  
ATOM     67  C   GLU A  18      15.396  25.684  14.909  1.00  0.00           C  
ATOM     68  O   GLU A  18      16.531  25.262  14.731  1.00  0.00           O  
ATOM     69  N   PRO A  19      14.515  25.042  15.674  1.00  0.00           N  
ATOM     70  CA  PRO A  19      14.844  23.721  16.168  1.00  0.00           C  
ATOM     71  C   PRO A  19      15.417  22.662  15.224  1.00  0.00           C  
ATOM     72  O   PRO A  19      16.008  21.670  15.657  1.00  0.00           O  
ATOM     73  N   SER A  20      15.194  22.909  13.937  1.00  0.00           N  
ATOM     74  CA  SER A  20      15.688  22.241  12.748  1.00  0.00           C  
ATOM     75  C   SER A  20      17.219  22.226  12.622  1.00  0.00           C  
ATOM     76  O   SER A  20      17.741  21.267  12.064  1.00  0.00           O  
ATOM     77  N   ASP A  21      17.846  23.290  13.112  1.00  0.00           N  
ATOM     78  CA  ASP A  21      19.273  23.571  13.098  1.00  0.00           C  
ATOM     79  C   ASP A  21      19.977  22.353  13.707  1.00  0.00           C  
ATOM     80  O   ASP A  21      19.704  22.043  14.861  1.00  0.00           O  
ATOM     81  N   THR A  22      20.934  21.847  12.936  1.00  0.00           N  
ATOM     82  CA  THR A  22      21.954  20.947  13.443  1.00  0.00           C  
ATOM     83  C   THR A  22      22.977  21.860  14.127  1.00  0.00           C  
ATOM     84  O   THR A  22      23.257  22.982  13.717  1.00  0.00           O  
ATOM     85  N   ILE A  23      23.554  21.264  15.182  1.00  0.00           N  
ATOM     86  CA  ILE A  23      24.700  21.762  15.911  1.00  0.00           C  
ATOM     87  C   ILE A  23      25.853  22.238  15.028  1.00  0.00           C  
ATOM     88  O   ILE A  23      26.297  23.369  15.221  1.00  0.00           O  
ATOM     89  N   GLU A  24      26.340  21.458  14.068  1.00  0.00           N  
ATOM     90  CA  GLU A  24      27.123  21.855  12.921  1.00  0.00           C  
ATOM     91  C   GLU A  24      26.803  23.198  12.258  1.00  0.00           C  
ATOM     92  O   GLU A  24      27.670  23.992  11.915  1.00  0.00           O  
ATOM     93  N   ASN A  25      25.537  23.557  12.078  1.00  0.00           N  
ATOM     94  CA  ASN A  25      24.987  24.807  11.571  1.00  0.00           C  
ATOM     95  C   ASN A  25      25.047  25.991  12.540  1.00  0.00           C  
ATOM     96  O   ASN A  25      25.625  27.030  12.231  1.00  0.00           O  
ATOM     97  N   VAL A  26      24.871  25.684  13.815  1.00  0.00           N  
ATOM     98  CA  VAL A  26      25.075  26.612  14.912  1.00  0.00           C  
ATOM     99  C   VAL A  26      26.571  26.899  15.050  1.00  0.00           C  
ATOM    100  O   VAL A  26      26.937  28.070  15.166  1.00  0.00           O  
ATOM    101  N   LYS A  27      27.458  25.914  14.956  1.00  0.00           N  
ATOM    102  CA  LYS A  27      28.895  26.079  15.027  1.00  0.00           C  
ATOM    103  C   LYS A  27      29.451  27.056  13.986  1.00  0.00           C  
ATOM    104  O   LYS A  27      30.285  27.919  14.240  1.00  0.00           O  
ATOM    105  N   ALA A  28      28.871  27.034  12.799  1.00  0.00           N  
ATOM    106  CA  ALA A  28      29.196  27.739  11.577  1.00  0.00           C  
ATOM    107  C   ALA A  28      28.790  29.215  11.668  1.00  0.00           C  
ATOM    108  O   ALA A  28      29.290  30.079  10.956  1.00  0.00           O  
ATOM    109  N   LYS A  29      27.691  29.450  12.379  1.00  0.00           N  
ATOM    110  CA  LYS A  29      27.024  30.720  12.626  1.00  0.00           C  
ATOM    111  C   LYS A  29      27.865  31.471  13.659  1.00  0.00           C  
ATOM    112  O   LYS A  29      28.001  32.695  13.597  1.00  0.00           O  
ATOM    113  N   ILE A  30      28.334  30.818  14.712  1.00  0.00           N  
ATOM    114  CA  ILE A  30      29.422  31.315  15.530  1.00  0.00           C  
ATOM    115  C   ILE A  30      30.736  31.500  14.757  1.00  0.00           C  
ATOM    116  O   ILE A  30      31.462  32.458  14.977  1.00  0.00           O  
ATOM    117  N   GLN A  31      30.989  30.635  13.770  1.00  0.00           N  
ATOM    118  CA  GLN A  31      32.170  30.814  12.966  1.00  0.00           C  
ATOM    119  C   GLN A  31      32.186  32.164  12.234  1.00  0.00           C  
ATOM    120  O   GLN A  31      33.159  32.922  12.242  1.00  0.00           O  
ATOM    121  N   ASP A  32      31.016  32.578  11.755  1.00  0.00           N  
ATOM    122  CA  ASP A  32      30.929  33.903  11.175  1.00  0.00           C  
ATOM    123  C   ASP A  32      31.311  35.123  12.020  1.00  0.00           C  
ATOM    124  O   ASP A  32      32.124  35.971  11.678  1.00  0.00           O  
ATOM    125  N   LYS A  33      30.496  35.181  13.067  1.00  0.00           N  
ATOM    126  CA  LYS A  33      30.383  36.306  13.967  1.00  0.00           C  
ATOM    127  C   LYS A  33      31.702  36.532  14.708  1.00  0.00           C  
ATOM    128  O   LYS A  33      32.064  37.689  14.872  1.00  0.00           O  
ATOM    129  N   GLU A  34      32.372  35.502  15.209  1.00  0.00           N  
ATOM    130  CA  GLU A  34      33.480  35.683  16.132  1.00  0.00           C  
ATOM    131  C   GLU A  34      34.793  35.112  15.585  1.00  0.00           C  
ATOM    132  O   GLU A  34      35.874  35.375  16.103  1.00  0.00           O  
ATOM    133  N   GLY A  35      34.714  34.237  14.593  1.00  0.00           N  
ATOM    134  CA  GLY A  35      35.827  33.577  13.958  1.00  0.00           C  
ATOM    135  C   GLY A  35      35.967  32.130  14.447  1.00  0.00           C  
ATOM    136  O   GLY A  35      36.702  31.384  13.804  1.00  0.00           O  
ATOM    137  N   ILE A  36      35.233  31.695  15.463  1.00  0.00           N  
ATOM    138  CA  ILE A  36      35.568  30.464  16.157  1.00  0.00           C  
ATOM    139  C   ILE A  36      35.369  29.248  15.253  1.00  0.00           C  
ATOM    140  O   ILE A  36      34.212  29.028  14.887  1.00  0.00           O  
ATOM    141  N   PRO A  37      36.376  28.474  14.860  1.00  0.00           N  
ATOM    142  CA  PRO A  37      36.231  27.481  13.821  1.00  0.00           C  
ATOM    143  C   PRO A  37      35.449  26.293  14.387  1.00  0.00           C  
ATOM    144  O   PRO A  37      35.281  26.106  15.591  1.00  0.00           O  
ATOM    145  N   PRO A  38      34.815  25.528  13.510  1.00  0.00           N  
ATOM    146  CA  PRO A  38      33.927  24.497  14.016  1.00  0.00           C  
ATOM    147  C   PRO A  38      34.574  23.316  14.745  1.00  0.00           C  
ATOM    148  O   PRO A  38      33.991  22.629  15.591  1.00  0.00           O  
ATOM    149  N   ASP A  39      35.752  22.911  14.285  1.00  0.00           N  
ATOM    150  CA  ASP A  39      36.495  21.780  14.785  1.00  0.00           C  
ATOM    151  C   ASP A  39      36.967  21.793  16.241  1.00  0.00           C  
ATOM    152  O   ASP A  39      36.883  20.772  16.920  1.00  0.00           O  
ATOM    153  N   GLN A  40      37.186  22.954  16.842  1.00  0.00           N  
ATOM    154  CA  GLN A  40      37.514  23.161  18.245  1.00  0.00           C  
ATOM    155  C   GLN A  40      36.278  23.193  19.142  1.00  0.00           C  
ATOM    156  O   GLN A  40      36.477  23.119  20.360  1.00  0.00           O  
ATOM    157  N   GLN A  41      35.153  23.650  18.614  1.00  0.00           N  
ATOM    158  CA  GLN A  41      33.917  23.773  19.359  1.00  0.00           C  
ATOM    159  C   GLN A  41      33.311  22.430  19.772  1.00  0.00           C  
ATOM    160  O   GLN A  41      33.006  21.548  18.959  1.00  0.00           O  
ATOM    161  N   ARG A  42      32.901  22.338  21.025  1.00  0.00           N  
ATOM    162  CA  ARG A  42      31.990  21.391  21.656  1.00  0.00           C  
ATOM    163  C   ARG A  42      30.985  22.291  22.372  1.00  0.00           C  
ATOM    164  O   ARG A  42      31.356  23.343  22.913  1.00  0.00           O  
ATOM    165  N   LEU A  43      29.732  21.844  22.323  1.00  0.00           N  
ATOM    166  CA  LEU A  43      28.508  22.473  22.788  1.00  0.00           C  
ATOM    167  C   LEU A  43      27.927  21.545  23.861  1.00  0.00           C  
ATOM    168  O   LEU A  43      27.860  20.321  23.720  1.00  0.00           O  
ATOM    169  N   ILE A  44      27.507  22.258  24.900  1.00  0.00           N  
ATOM    170  CA  ILE A  44      26.817  21.711  26.045  1.00  0.00           C  
ATOM    171  C   ILE A  44      25.463  22.379  26.293  1.00  0.00           C  
ATOM    172  O   ILE A  44      25.351  23.560  25.995  1.00  0.00           O  
ATOM    173  N   PHE A  45      24.629  21.597  26.983  1.00  0.00           N  
ATOM    174  CA  PHE A  45      23.310  21.853  27.528  1.00  0.00           C  
ATOM    175  C   PHE A  45      23.180  20.792  28.629  1.00  0.00           C  
ATOM    176  O   PHE A  45      23.357  19.627  28.262  1.00  0.00           O  
ATOM    177  N   ALA A  46      22.844  21.186  29.850  1.00  0.00           N  
ATOM    178  CA  ALA A  46      22.389  20.323  30.928  1.00  0.00           C  
ATOM    179  C   ALA A  46      23.315  19.180  31.344  1.00  0.00           C  
ATOM    180  O   ALA A  46      22.818  18.206  31.913  1.00  0.00           O  
ATOM    181  N   GLY A  47      24.625  19.323  31.130  1.00  0.00           N  
ATOM    182  CA  GLY A  47      25.720  18.496  31.610  1.00  0.00           C  
ATOM    183  C   GLY A  47      26.341  17.626  30.523  1.00  0.00           C  
ATOM    184  O   GLY A  47      27.424  17.091  30.779  1.00  0.00           O  
ATOM    185  N   LYS A  48      25.686  17.588  29.359  1.00  0.00           N  
ATOM    186  CA  LYS A  48      25.910  16.642  28.286  1.00  0.00           C  
ATOM    187  C   LYS A  48      26.290  17.358  26.977  1.00  0.00           C  
ATOM    188  O   LYS A  48      25.635  18.336  26.629  1.00  0.00           O  
ATOM    189  N   GLN A  49      27.197  16.787  26.195  1.00  0.00           N  
ATOM    190  CA  GLN A  49      27.822  17.327  25.002  1.00  0.00           C  
ATOM    191  C   GLN A  49      26.971  16.923  23.800  1.00  0.00           C  
ATOM    192  O   GLN A  49      26.819  15.752  23.461  1.00  0.00           O  
ATOM    193  N   LEU A  50      26.414  17.909  23.120  1.00  0.00           N  
ATOM    194  CA  LEU A  50      25.469  17.750  22.028  1.00  0.00           C  
ATOM    195  C   LEU A  50      26.266  17.482  20.748  1.00  0.00           C  
ATOM    196  O   LEU A  50      27.280  18.107  20.444  1.00  0.00           O  
ATOM    197  N   GLU A  51      25.710  16.498  20.046  1.00  0.00           N  
ATOM    198  CA  GLU A  51      26.387  15.781  18.982  1.00  0.00           C  
ATOM    199  C   GLU A  51      26.065  16.483  17.663  1.00  0.00           C  
ATOM    200  O   GLU A  51      24.886  16.614  17.377  1.00  0.00           O  
ATOM    201  N   ASP A  52      27.089  16.892  16.919  1.00  0.00           N  
ATOM    202  CA  ASP A  52      27.063  17.883  15.872  1.00  0.00           C  
ATOM    203  C   ASP A  52      26.067  17.736  14.728  1.00  0.00           C  
ATOM    204  O   ASP A  52      25.794  18.708  14.022  1.00  0.00           O  
ATOM    205  N   GLY A  53      25.576  16.533  14.470  1.00  0.00           N  
ATOM    206  CA  GLY A  53      24.637  16.141  13.432  1.00  0.00           C  
ATOM    207  C   GLY A  53      23.164  15.960  13.790  1.00  0.00           C  
ATOM    208  O   GLY A  53      22.330  15.601  12.953  1.00  0.00           O  
ATOM    209  N   ARG A  54      22.902  16.079  15.088  1.00  0.00           N  
ATOM    210  CA  ARG A  54      21.584  16.087  15.693  1.00  0.00           C  
ATOM    211  C   ARG A  54      21.098  17.535  15.750  1.00  0.00           C  
ATOM    212  O   ARG A  54      21.937  18.440  15.694  1.00  0.00           O  
ATOM    213  N   THR A  55      19.786  17.741  15.807  1.00  0.00           N  
ATOM    214  CA  THR A  55      19.067  18.995  15.828  1.00  0.00           C  
ATOM    215  C   THR A  55      18.757  19.358  17.280  1.00  0.00           C  
ATOM    216  O   THR A  55      18.801  18.466  18.126  1.00  0.00           O  
ATOM    217  N   LEU A  56      18.340  20.608  17.456  1.00  0.00           N  
ATOM    218  CA  LEU A  56      17.918  21.007  18.786  1.00  0.00           C  
ATOM    219  C   LEU A  56      16.592  20.307  19.111  1.00  0.00           C  
ATOM    220  O   LEU A  56      16.230  19.935  20.221  1.00  0.00           O  
ATOM    221  N   SER A  57      15.829  20.087  18.046  1.00  0.00           N  
ATOM    222  CA  SER A  57      14.691  19.189  17.990  1.00  0.00           C  
ATOM    223  C   SER A  57      14.944  17.774  18.506  1.00  0.00           C  
ATOM    224  O   SER A  57      14.012  17.336  19.165  1.00  0.00           O  
ATOM    225  N   ASP A  58      16.105  17.156  18.258  1.00  0.00           N  
ATOM    226  CA  ASP A  58      16.263  15.737  18.517  1.00  0.00           C  
ATOM    227  C   ASP A  58      16.369  15.501  20.017  1.00  0.00           C  
ATOM    228  O   ASP A  58      15.891  14.456  20.445  1.00  0.00           O  
ATOM    229  N   TYR A  59      16.846  16.494  20.768  1.00  0.00           N  
ATOM    230  CA  TYR A  59      17.026  16.428  22.203  1.00  0.00           C  
ATOM    231  C   TYR A  59      15.936  17.147  23.011  1.00  0.00           C  
ATOM    232  O   TYR A  59      16.079  17.332  24.210  1.00  0.00           O  
ATOM    233  N   ASN A  60      14.859  17.564  22.362  1.00  0.00           N  
ATOM    234  CA  ASN A  60      13.721  18.304  22.893  1.00  0.00           C  
ATOM    235  C   ASN A  60      14.019  19.679  23.493  1.00  0.00           C  
ATOM    236  O   ASN A  60      13.439  20.036  24.511  1.00  0.00           O  
ATOM    237  N   ILE A  61      14.999  20.409  22.965  1.00  0.00           N  
ATOM    238  CA  ILE A  61      15.341  21.760  23.365  1.00  0.00           C  
ATOM    239  C   ILE A  61      14.517  22.689  22.475  1.00  0.00           C  
ATOM    240  O   ILE A  61      14.663  22.635  21.258  1.00  0.00           O  
ATOM    241  N   GLN A  62      13.585  23.444  23.044  1.00  0.00           N  
ATOM    242  CA  GLN A  62      12.618  24.368  22.485  1.00  0.00           C  
ATOM    243  C   GLN A  62      12.304  25.625  23.302  1.00  0.00           C  
ATOM    244  O   GLN A  62      11.397  25.572  24.126  1.00  0.00           O  
ATOM    245  N   LYS A  63      13.127  26.679  23.242  1.00  0.00           N  
ATOM    246  CA  LYS A  63      12.983  28.024  23.763  1.00  0.00           C  
ATOM    247  C   LYS A  63      13.374  28.268  25.222  1.00  0.00           C  
ATOM    248  O   LYS A  63      12.867  27.509  26.044  1.00  0.00           O  
ATOM    249  N   GLU A  64      14.151  29.284  25.575  1.00  0.00           N  
ATOM    250  CA  GLU A  64      14.601  29.823  26.836  1.00  0.00           C  
ATOM    251  C   GLU A  64      15.631  28.882  27.447  1.00  0.00           C  
ATOM    252  O   GLU A  64      15.655  28.622  28.655  1.00  0.00           O  
ATOM    253  N   SER A  65      16.530  28.350  26.623  1.00  0.00           N  
ATOM    254  CA  SER A  65      17.572  27.377  26.864  1.00  0.00           C  
ATOM    255  C   SER A  65      18.855  28.044  27.367  1.00  0.00           C  
ATOM    256  O   SER A  65      19.136  29.138  26.887  1.00  0.00           O  
ATOM    257  N   THR A  66      19.626  27.436  28.266  1.00  0.00           N  
ATOM    258  CA  THR A  66      20.997  27.749  28.630  1.00  0.00           C  
ATOM    259  C   THR A  66      21.869  26.731  27.883  1.00  0.00           C  
ATOM    260  O   THR A  66      21.929  25.552  28.220  1.00  0.00           O  
ATOM    261  N   LEU A  67      22.606  27.209  26.879  1.00  0.00           N  
ATOM    262  CA  LEU A  67      23.616  26.454  26.170  1.00  0.00           C  
ATOM    263  C   LEU A  67      25.005  27.023  26.478  1.00  0.00           C  
ATOM    264  O   LEU A  67      25.050  28.217  26.754  1.00  0.00           O  
ATOM    265  N   HIS A  68      26.078  26.227  26.447  1.00  0.00           N  
ATOM    266  CA  HIS A  68      27.472  26.495  26.718  1.00  0.00           C  
ATOM    267  C   HIS A  68      28.357  26.190  25.517  1.00  0.00           C  
ATOM    268  O   HIS A  68      28.174  25.115  24.952  1.00  0.00           O  
ATOM    269  N   LEU A  69      29.380  26.989  25.208  1.00  0.00           N  
ATOM    270  CA  LEU A  69      30.548  26.609  24.432  1.00  0.00           C  
ATOM    271  C   LEU A  69      31.731  26.276  25.349  1.00  0.00           C  
ATOM    272  O   LEU A  69      31.917  27.043  26.289  1.00  0.00           O  
ATOM    273  N   VAL A  70      32.401  25.175  25.012  1.00  0.00           N  
ATOM    274  CA  VAL A  70      33.748  24.861  25.438  1.00  0.00           C  
ATOM    275  C   VAL A  70      34.668  24.833  24.219  1.00  0.00           C  
ATOM    276  O   VAL A  70      34.328  24.418  23.112  1.00  0.00           O  
TER
ENDMDL
MODEL      8
ATOM      1  N   GLN A   2      15.374  31.991  18.802  1.00  0.00           N  
ATOM      2  CA  GLN A   2      16.623  32.401  19.411  1.00  0.00           C  
ATOM      3  C   GLN A   2      17.151  31.525  20.545  1.00  0.00           C  
ATOM      4  O   GLN A   2      16.417  30.978  21.368  1.00  0.00           O  
ATOM      5  N   ILE A   3      18.482  31.535  20.629  1.00  0.00           N  
ATOM      6  CA  ILE A   3      19.272  31.040  21.741  1.00  0.00           C  
ATOM      7  C   ILE A   3      20.424  31.969  22.131  1.00  0.00           C  
ATOM      8  O   ILE A   3      21.106  32.565  21.299  1.00  0.00           O  
ATOM      9  N   PHE A   4      20.781  32.099  23.408  1.00  0.00           N  
ATOM     10  CA  PHE A   4      22.043  32.665  23.830  1.00  0.00           C  
ATOM     11  C   PHE A   4      23.080  31.548  23.944  1.00  0.00           C  
ATOM     12  O   PHE A   4      22.884  30.552  24.639  1.00  0.00           O  
ATOM     13  N   VAL A   5      24.175  31.691  23.200  1.00  0.00           N  
ATOM     14  CA  VAL A   5      25.464  31.082  23.427  1.00  0.00           C  
ATOM     15  C   VAL A   5      26.068  32.037  24.447  1.00  0.00           C  
ATOM     16  O   VAL A   5      26.237  33.241  24.244  1.00  0.00           O  
ATOM     17  N   LYS A   6      26.453  31.366  25.532  1.00  0.00           N  
ATOM     18  CA  LYS A   6      27.386  31.920  26.505  1.00  0.00           C  
ATOM     19  C   LYS A   6      28.712  31.212  26.226  1.00  0.00           C  
ATOM     20  O   LYS A   6      28.934  30.045  26.533  1.00  0.00           O  
ATOM     21  N   THR A   7      29.616  31.958  25.590  1.00  0.00           N  
ATOM     22  CA  THR A   7      30.989  31.537  25.386  1.00  0.00           C  
ATOM     23  C   THR A   7      31.748  31.600  26.711  1.00  0.00           C  
ATOM     24  O   THR A   7      31.579  32.549  27.473  1.00  0.00           O  
ATOM     25  N   LEU A   8      32.582  30.614  27.033  1.00  0.00           N  
ATOM     26  CA  LEU A   8      33.203  30.507  28.337  1.00  0.00           C  
ATOM     27  C   LEU A   8      33.920  31.717  28.937  1.00  0.00           C  
ATOM     28  O   LEU A   8      33.651  31.931  30.113  1.00  0.00           O  
ATOM     29  N   THR A   9      34.684  32.577  28.266  1.00  0.00           N  
ATOM     30  CA  THR A   9      35.082  33.946  28.501  1.00  0.00           C  
ATOM     31  C   THR A   9      34.054  34.865  29.156  1.00  0.00           C  
ATOM     32  O   THR A   9      34.443  35.739  29.938  1.00  0.00           O  
ATOM     33  N   GLY A  10      32.760  34.653  28.935  1.00  0.00           N  
ATOM     34  CA  GLY A  10      31.675  35.389  29.560  1.00  0.00           C  
ATOM     35  C   GLY A  10      30.766  36.007  28.496  1.00  0.00           C  
ATOM     36  O   GLY A  10      29.629  36.437  28.702  1.00  0.00           O  
ATOM     37  N   LYS A  11      31.303  36.143  27.291  1.00  0.00           N  
ATOM     38  CA  LYS A  11      30.652  36.930  26.265  1.00  0.00           C  
ATOM     39  C   LYS A  11      29.409  36.177  25.783  1.00  0.00           C  
ATOM     40  O   LYS A  11      29.550  34.962  25.606  1.00  0.00           O  
ATOM     41  N   THR A  12      28.310  36.875  25.548  1.00  0.00           N  
ATOM     42  CA  THR A  12      27.025  36.294  25.194  1.00  0.00           C  
ATOM     43  C   THR A  12      26.497  36.708  23.819  1.00  0.00           C  
ATOM     44  O   THR A  12      25.928  37.774  23.600  1.00  0.00           O  
ATOM     45  N   ILE A  13      26.464  35.730  22.929  1.00  0.00           N  
ATOM     46  CA  ILE A  13      26.046  36.025  21.574  1.00  0.00           C  
ATOM     47  C   ILE A  13      24.622  35.491  21.391  1.00  0.00           C  
ATOM     48  O   ILE A  13      24.425  34.290  21.509  1.00  0.00           O  
ATOM     49  N   THR A  14      23.645  36.234  20.858  1.00  0.00           N  
ATOM     50  CA  THR A  14      22.318  35.733  20.605  1.00  0.00           C  
ATOM     51  C   THR A  14      22.244  35.237  19.152  1.00  0.00           C  
ATOM     52  O   THR A  14      22.525  35.980  18.217  1.00  0.00           O  
ATOM     53  N   LEU A  15      21.875  33.975  18.906  1.00  0.00           N  
ATOM     54  CA  LEU A  15      21.823  33.366  17.593  1.00  0.00           C  
ATOM     55  C   LEU A  15      20.347  33.122  17.247  1.00  0.00           C  
ATOM     56  O   LEU A  15      19.601  32.617  18.066  1.00  0.00           O  
ATOM     57  N   GLU A  16      19.933  33.510  16.040  1.00  0.00           N  
ATOM     58  CA  GLU A  16      18.646  33.198  15.452  1.00  0.00           C  
ATOM     59  C   GLU A  16      18.799  31.799  14.849  1.00  0.00           C  
ATOM     60  O   GLU A  16      19.768  31.478  14.160  1.00  0.00           O  
ATOM     61  N   VAL A  17      17.833  30.935  15.149  1.00  0.00           N  
ATOM     62  CA  VAL A  17      17.767  29.585  14.625  1.00  0.00           C  
ATOM     63  C   VAL A  17      16.336  29.122  14.357  1.00  0.00           C  
ATOM     64  O   VAL A  17      15.394  29.837  14.679  1.00  0.00           O  
ATOM     65  N   GLU A  18      16.299  27.842  13.996  1.00  0.00           N  
ATOM     66  CA  GLU A  18      15.080  27.090  13.770  1.00  0.00           C  
ATOM     67  C   GLU A  18      15.255  25.683  14.334  1.00  0.00           C  
ATOM     68  O   GLU A  18      16.353  25.140  14.258  1.00  0.00           O  
ATOM     69  N   PRO A  19      14.302  24.975  14.931  1.00  0.00           N  
ATOM     70  CA  PRO A  19      14.575  23.769  15.681  1.00  0.00           C  
ATOM     71  C   PRO A  19      14.923  22.535  14.846  1.00  0.00           C  
ATOM     72  O   PRO A  19      15.221  21.450  15.351  1.00  0.00           O  
ATOM     73  N   SER A  20      14.655  22.551  13.545  1.00  0.00           N  
ATOM     74  CA  SER A  20      15.123  21.667  12.488  1.00  0.00           C  
ATOM     75  C   SER A  20      16.566  21.858  12.012  1.00  0.00           C  
ATOM     76  O   SER A  20      17.037  21.140  11.130  1.00  0.00           O  
ATOM     77  N   ASP A  21      17.320  22.779  12.600  1.00  0.00           N  
ATOM     78  CA  ASP A  21      18.680  23.149  12.267  1.00  0.00           C  
ATOM     79  C   ASP A  21      19.647  22.345  13.145  1.00  0.00           C  
ATOM     80  O   ASP A  21      19.217  21.945  14.225  1.00  0.00           O  
ATOM     81  N   THR A  22      20.851  22.069  12.648  1.00  0.00           N  
ATOM     82  CA  THR A  22      21.861  21.253  13.290  1.00  0.00           C  
ATOM     83  C   THR A  22      22.355  22.107  14.451  1.00  0.00           C  
ATOM     84  O   THR A  22      22.322  23.341  14.471  1.00  0.00           O  
ATOM     85  N   ILE A  23      22.984  21.423  15.398  1.00  0.00           N  
ATOM     86  CA  ILE A  23      24.093  21.772  16.264  1.00  0.00           C  
ATOM     87  C   ILE A  23      25.261  22.357  15.460  1.00  0.00           C  
ATOM     88  O   ILE A  23      25.850  23.313  15.952  1.00  0.00           O  
ATOM     89  N   GLU A  24      25.568  21.772  14.306  1.00  0.00           N  
ATOM     90  CA  GLU A  24      26.592  22.423  13.509  1.00  0.00           C  
ATOM     91  C   GLU A  24      26.231  23.855  13.121  1.00  0.00           C  
ATOM     92  O   GLU A  24      27.073  24.713  13.380  1.00  0.00           O  
ATOM     93  N   ASN A  25      25.011  24.113  12.656  1.00  0.00           N  
ATOM     94  CA  ASN A  25      24.657  25.453  12.253  1.00  0.00           C  
ATOM     95  C   ASN A  25      24.493  26.420  13.429  1.00  0.00           C  
ATOM     96  O   ASN A  25      24.507  27.630  13.235  1.00  0.00           O  
ATOM     97  N   VAL A  26      24.213  25.926  14.636  1.00  0.00           N  
ATOM     98  CA  VAL A  26      24.641  26.600  15.837  1.00  0.00           C  
ATOM     99  C   VAL A  26      26.111  27.010  15.850  1.00  0.00           C  
ATOM    100  O   VAL A  26      26.402  28.202  15.988  1.00  0.00           O  
ATOM    101  N   LYS A  27      27.073  26.095  15.793  1.00  0.00           N  
ATOM    102  CA  LYS A  27      28.500  26.372  15.877  1.00  0.00           C  
ATOM    103  C   LYS A  27      29.086  27.119  14.681  1.00  0.00           C  
ATOM    104  O   LYS A  27      29.943  27.973  14.903  1.00  0.00           O  
ATOM    105  N   ALA A  28      28.669  26.848  13.443  1.00  0.00           N  
ATOM    106  CA  ALA A  28      28.973  27.520  12.202  1.00  0.00           C  
ATOM    107  C   ALA A  28      28.625  29.008  12.136  1.00  0.00           C  
ATOM    108  O   ALA A  28      29.392  29.767  11.541  1.00  0.00           O  
ATOM    109  N   LYS A  29      27.495  29.385  12.730  1.00  0.00           N  
ATOM    110  CA  LYS A  29      27.298  30.794  13.022  1.00  0.00           C  
ATOM    111  C   LYS A  29      28.420  31.533  13.751  1.00  0.00           C  
ATOM    112  O   LYS A  29      28.535  32.748  13.580  1.00  0.00           O  
ATOM    113  N   ILE A  30      29.121  30.928  14.714  1.00  0.00           N  
ATOM    114  CA  ILE A  30      30.087  31.615  15.545  1.00  0.00           C  
ATOM    115  C   ILE A  30      31.288  31.970  14.665  1.00  0.00           C  
ATOM    116  O   ILE A  30      32.097  32.844  14.959  1.00  0.00           O  
ATOM    117  N   GLN A  31      31.414  31.425  13.464  1.00  0.00           N  
ATOM    118  CA  GLN A  31      32.393  31.805  12.460  1.00  0.00           C  
ATOM    119  C   GLN A  31      32.231  33.252  11.988  1.00  0.00           C  
ATOM    120  O   GLN A  31      33.138  34.071  11.905  1.00  0.00           O  
ATOM    121  N   ASP A  32      30.972  33.613  11.766  1.00  0.00           N  
ATOM    122  CA  ASP A  32      30.643  34.915  11.227  1.00  0.00           C  
ATOM    123  C   ASP A  32      30.602  35.961  12.346  1.00  0.00           C  
ATOM    124  O   ASP A  32      31.017  37.104  12.139  1.00  0.00           O  
ATOM    125  N   LYS A  33      30.202  35.620  13.569  1.00  0.00           N  
ATOM    126  CA  LYS A  33      30.380  36.507  14.695  1.00  0.00           C  
ATOM    127  C   LYS A  33      31.853  36.490  15.103  1.00  0.00           C  
ATOM    128  O   LYS A  33      32.487  37.537  15.042  1.00  0.00           O  
ATOM    129  N   GLU A  34      32.473  35.443  15.630  1.00  0.00           N  
ATOM    130  CA  GLU A  34      33.651  35.444  16.471  1.00  0.00           C  
ATOM    131  C   GLU A  34      34.952  35.036  15.791  1.00  0.00           C  
ATOM    132  O   GLU A  34      36.086  35.298  16.179  1.00  0.00           O  
ATOM    133  N   GLY A  35      34.791  34.278  14.702  1.00  0.00           N  
ATOM    134  CA  GLY A  35      35.875  33.912  13.807  1.00  0.00           C  
ATOM    135  C   GLY A  35      36.365  32.508  14.182  1.00  0.00           C  
ATOM    136  O   GLY A  35      37.544  32.253  13.953  1.00  0.00           O  
ATOM    137  N   ILE A  36      35.504  31.684  14.788  1.00  0.00           N  
ATOM    138  CA  ILE A  36      35.890  30.402  15.314  1.00  0.00           C  
ATOM    139  C   ILE A  36      35.283  29.368  14.367  1.00  0.00           C  
ATOM    140  O   ILE A  36      34.096  29.411  14.059  1.00  0.00           O  
ATOM    141  N   PRO A  37      36.056  28.405  13.872  1.00  0.00           N  
ATOM    142  CA  PRO A  37      35.516  27.283  13.131  1.00  0.00           C  
ATOM    143  C   PRO A  37      34.734  26.329  14.036  1.00  0.00           C  
ATOM    144  O   PRO A  37      34.771  26.401  15.260  1.00  0.00           O  
ATOM    145  N   PRO A  38      33.927  25.400  13.522  1.00  0.00           N  
ATOM    146  CA  PRO A  38      33.127  24.425  14.243  1.00  0.00           C  
ATOM    147  C   PRO A  38      33.880  23.289  14.945  1.00  0.00           C  
ATOM    148  O   PRO A  38      33.494  23.014  16.077  1.00  0.00           O  
ATOM    149  N   ASP A  39      34.937  22.771  14.338  1.00  0.00           N  
ATOM    150  CA  ASP A  39      35.775  21.675  14.787  1.00  0.00           C  
ATOM    151  C   ASP A  39      36.398  21.894  16.167  1.00  0.00           C  
ATOM    152  O   ASP A  39      36.657  20.912  16.854  1.00  0.00           O  
ATOM    153  N   GLN A  40      36.505  23.134  16.640  1.00  0.00           N  
ATOM    154  CA  GLN A  40      37.106  23.587  17.876  1.00  0.00           C  
ATOM    155  C   GLN A  40      36.156  23.785  19.059  1.00  0.00           C  
ATOM    156  O   GLN A  40      36.564  24.176  20.148  1.00  0.00           O  
ATOM    157  N   GLN A  41      34.850  23.717  18.810  1.00  0.00           N  
ATOM    158  CA  GLN A  41      33.793  24.028  19.740  1.00  0.00           C  
ATOM    159  C   GLN A  41      33.315  22.724  20.401  1.00  0.00           C  
ATOM    160  O   GLN A  41      32.965  21.843  19.624  1.00  0.00           O  
ATOM    161  N   ARG A  42      33.146  22.680  21.713  1.00  0.00           N  
ATOM    162  CA  ARG A  42      32.728  21.531  22.496  1.00  0.00           C  
ATOM    163  C   ARG A  42      31.415  21.890  23.197  1.00  0.00           C  
ATOM    164  O   ARG A  42      31.438  22.708  24.113  1.00  0.00           O  
ATOM    165  N   LEU A  43      30.337  21.341  22.658  1.00  0.00           N  
ATOM    166  CA  LEU A  43      28.964  21.643  23.009  1.00  0.00           C  
ATOM    167  C   LEU A  43      28.534  20.530  23.981  1.00  0.00           C  
ATOM    168  O   LEU A  43      28.523  19.338  23.680  1.00  0.00           O  
ATOM    169  N   ILE A  44      28.177  20.881  25.209  1.00  0.00           N  
ATOM    170  CA  ILE A  44      27.713  20.009  26.266  1.00  0.00           C  
ATOM    171  C   ILE A  44      26.289  20.490  26.541  1.00  0.00           C  
ATOM    172  O   ILE A  44      26.070  21.679  26.305  1.00  0.00           O  
ATOM    173  N   PHE A  45      25.384  19.618  26.971  1.00  0.00           N  
ATOM    174  CA  PHE A  45      24.092  19.972  27.523  1.00  0.00           C  
ATOM    175  C   PHE A  45      23.468  18.700  28.101  1.00  0.00           C  
ATOM    176  O   PHE A  45      23.482  17.610  27.537  1.00  0.00           O  
ATOM    177  N   ALA A  46      22.874  18.868  29.274  1.00  0.00           N  
ATOM    178  CA  ALA A  46      22.210  17.862  30.077  1.00  0.00           C  
ATOM    179  C   ALA A  46      23.075  16.733  30.653  1.00  0.00           C  
ATOM    180  O   ALA A  46      22.719  15.554  30.556  1.00  0.00           O  
ATOM    181  N   GLY A  47      24.340  17.042  30.895  1.00  0.00           N  
ATOM    182  CA  GLY A  47      25.263  16.118  31.520  1.00  0.00           C  
ATOM    183  C   GLY A  47      26.103  15.314  30.532  1.00  0.00           C  
ATOM    184  O   GLY A  47      26.940  14.554  31.016  1.00  0.00           O  
ATOM    185  N   LYS A  48      25.807  15.478  29.240  1.00  0.00           N  
ATOM    186  CA  LYS A  48      26.376  14.768  28.118  1.00  0.00           C  
ATOM    187  C   LYS A  48      26.955  15.712  27.054  1.00  0.00           C  
ATOM    188  O   LYS A  48      26.478  16.834  26.896  1.00  0.00           O  
ATOM    189  N   GLN A  49      28.020  15.293  26.372  1.00  0.00           N  
ATOM    190  CA  GLN A  49      28.519  15.850  25.132  1.00  0.00           C  
ATOM    191  C   GLN A  49      27.589  15.617  23.943  1.00  0.00           C  
ATOM    192  O   GLN A  49      27.158  14.479  23.773  1.00  0.00           O  
ATOM    193  N   LEU A  50      27.315  16.608  23.091  1.00  0.00           N  
ATOM    194  CA  LEU A  50      26.485  16.489  21.910  1.00  0.00           C  
ATOM    195  C   LEU A  50      27.471  16.185  20.778  1.00  0.00           C  
ATOM    196  O   LEU A  50      28.061  17.140  20.280  1.00  0.00           O  
ATOM    197  N   GLU A  51      27.566  14.923  20.373  1.00  0.00           N  
ATOM    198  CA  GLU A  51      28.583  14.576  19.398  1.00  0.00           C  
ATOM    199  C   GLU A  51      28.275  14.962  17.954  1.00  0.00           C  
ATOM    200  O   GLU A  51      29.122  14.900  17.063  1.00  0.00           O  
ATOM    201  N   ASP A  52      27.019  15.259  17.634  1.00  0.00           N  
ATOM    202  CA  ASP A  52      26.510  15.682  16.342  1.00  0.00           C  
ATOM    203  C   ASP A  52      25.773  14.553  15.614  1.00  0.00           C  
ATOM    204  O   ASP A  52      26.115  13.380  15.654  1.00  0.00           O  
ATOM    205  N   GLY A  53      24.738  14.946  14.876  1.00  0.00           N  
ATOM    206  CA  GLY A  53      24.039  14.030  13.992  1.00  0.00           C  
ATOM    207  C   GLY A  53      22.538  14.307  14.065  1.00  0.00           C  
ATOM    208  O   GLY A  53      21.799  13.805  13.227  1.00  0.00           O  
ATOM    209  N   ARG A  54      22.095  15.163  14.985  1.00  0.00           N  
ATOM    210  CA  ARG A  54      20.701  15.347  15.339  1.00  0.00           C  
ATOM    211  C   ARG A  54      20.444  16.808  15.681  1.00  0.00           C  
ATOM    212  O   ARG A  54      21.301  17.536  16.181  1.00  0.00           O  
ATOM    213  N   THR A  55      19.187  17.178  15.449  1.00  0.00           N  
ATOM    214  CA  THR A  55      18.772  18.568  15.460  1.00  0.00           C  
ATOM    215  C   THR A  55      18.469  19.137  16.847  1.00  0.00           C  
ATOM    216  O   THR A  55      18.405  18.347  17.784  1.00  0.00           O  
ATOM    217  N   LEU A  56      18.316  20.453  16.938  1.00  0.00           N  
ATOM    218  CA  LEU A  56      17.885  21.181  18.118  1.00  0.00           C  
ATOM    219  C   LEU A  56      16.654  20.635  18.841  1.00  0.00           C  
ATOM    220  O   LEU A  56      16.704  20.461  20.049  1.00  0.00           O  
ATOM    221  N   SER A  57      15.619  20.186  18.122  1.00  0.00           N  
ATOM    222  CA  SER A  57      14.479  19.406  18.585  1.00  0.00           C  
ATOM    223  C   SER A  57      14.788  18.048  19.206  1.00  0.00           C  
ATOM    224  O   SER A  57      14.296  17.791  20.311  1.00  0.00           O  
ATOM    225  N   ASP A  58      15.485  17.203  18.452  1.00  0.00           N  
ATOM    226  CA  ASP A  58      15.958  15.894  18.840  1.00  0.00           C  
ATOM    227  C   ASP A  58      16.620  15.852  20.217  1.00  0.00           C  
ATOM    228  O   ASP A  58      16.136  15.111  21.073  1.00  0.00           O  
ATOM    229  N   TYR A  59      17.666  16.653  20.417  1.00  0.00           N  
ATOM    230  CA  TYR A  59      18.388  16.842  21.650  1.00  0.00           C  
ATOM    231  C   TYR A  59      17.667  17.688  22.704  1.00  0.00           C  
ATOM    232  O   TYR A  59      18.024  17.603  23.879  1.00  0.00           O  
ATOM    233  N   ASN A  60      16.639  18.453  22.344  1.00  0.00           N  
ATOM    234  CA  ASN A  60      15.634  19.098  23.156  1.00  0.00           C  
ATOM    235  C   ASN A  60      16.064  20.505  23.566  1.00  0.00           C  
ATOM    236  O   ASN A  60      16.183  20.785  24.752  1.00  0.00           O  
ATOM    237  N   ILE A  61      16.223  21.410  22.596  1.00  0.00           N  
ATOM    238  CA  ILE A  61      16.618  22.770  22.913  1.00  0.00           C  
ATOM    239  C   ILE A  61      15.488  23.682  22.431  1.00  0.00           C  
ATOM    240  O   ILE A  61      15.108  23.579  21.272  1.00  0.00           O  
ATOM    241  N   GLN A  62      15.068  24.574  23.312  1.00  0.00           N  
ATOM    242  CA  GLN A  62      13.768  25.208  23.184  1.00  0.00           C  
ATOM    243  C   GLN A  62      14.006  26.711  23.270  1.00  0.00           C  
ATOM    244  O   GLN A  62      15.068  27.179  23.679  1.00  0.00           O  
ATOM    245  N   LYS A  63      12.994  27.483  22.872  1.00  0.00           N  
ATOM    246  CA  LYS A  63      13.209  28.903  22.665  1.00  0.00           C  
ATOM    247  C   LYS A  63      13.662  29.575  23.970  1.00  0.00           C  
ATOM    248  O   LYS A  63      13.104  29.216  25.001  1.00  0.00           O  
ATOM    249  N   GLU A  64      14.495  30.608  23.867  1.00  0.00           N  
ATOM    250  CA  GLU A  64      15.088  31.473  24.860  1.00  0.00           C  
ATOM    251  C   GLU A  64      15.939  30.692  25.852  1.00  0.00           C  
ATOM    252  O   GLU A  64      16.229  31.304  26.875  1.00  0.00           O  
ATOM    253  N   SER A  65      16.417  29.469  25.601  1.00  0.00           N  
ATOM    254  CA  SER A  65      17.380  28.765  26.413  1.00  0.00           C  
ATOM    255  C   SER A  65      18.822  29.195  26.149  1.00  0.00           C  
ATOM    256  O   SER A  65      19.078  29.726  25.069  1.00  0.00           O  
ATOM    257  N   THR A  66      19.684  29.122  27.171  1.00  0.00           N  
ATOM    258  CA  THR A  66      21.101  29.399  27.183  1.00  0.00           C  
ATOM    259  C   THR A  66      21.829  28.073  26.931  1.00  0.00           C  
ATOM    260  O   THR A  66      21.630  27.129  27.704  1.00  0.00           O  
ATOM    261  N   LEU A  67      22.796  28.031  26.016  1.00  0.00           N  
ATOM    262  CA  LEU A  67      23.864  27.065  25.874  1.00  0.00           C  
ATOM    263  C   LEU A  67      25.206  27.620  26.369  1.00  0.00           C  
ATOM    264  O   LEU A  67      25.469  28.774  26.019  1.00  0.00           O  
ATOM    265  N   HIS A  68      25.945  26.904  27.222  1.00  0.00           N  
ATOM    266  CA  HIS A  68      27.280  27.345  27.558  1.00  0.00           C  
ATOM    267  C   HIS A  68      28.189  26.671  26.533  1.00  0.00           C  
ATOM    268  O   HIS A  68      27.951  25.498  26.260  1.00  0.00           O  
ATOM    269  N   LEU A  69      29.200  27.360  26.005  1.00  0.00           N  
ATOM    270  CA  LEU A  69      30.076  26.654  25.098  1.00  0.00           C  
ATOM    271  C   LEU A  69      31.506  26.727  25.626  1.00  0.00           C  
ATOM    272  O   LEU A  69      31.957  27.825  25.962  1.00  0.00           O  
ATOM    273  N   VAL A  70      32.141  25.556  25.697  1.00  0.00           N  
ATOM    274  CA  VAL A  70      33.546  25.345  26.003  1.00  0.00           C  
ATOM    275  C   VAL A  70      34.240  25.238  24.639  1.00  0.00           C  
ATOM    276  O   VAL A  70      33.623  24.713  23.708  1.00  0.00           O  
TER
ENDMDL
MODEL      9
ATOM      1  N   GLN A   2      15.241  32.448  18.906  1.00  0.00           N  
ATOM      2  CA  GLN A   2      16.422  32.906  19.604  1.00  0.00           C  
ATOM      3  C   GLN A   2      16.953  31.864  20.602  1.00  0.00           C  
ATOM      4  O   GLN A   2      16.225  31.307  21.416  1.00  0.00           O  
ATOM      5  N   ILE A   3      18.265  31.669  20.568  1.00  0.00           N  
ATOM      6  CA  ILE A   3      18.994  31.058  21.666  1.00  0.00           C  
ATOM      7  C   ILE A   3      20.110  32.030  22.055  1.00  0.00           C  
ATOM      8  O   ILE A   3      20.400  33.056  21.433  1.00  0.00           O  
ATOM      9  N   PHE A   4      20.721  31.766  23.204  1.00  0.00           N  
ATOM     10  CA  PHE A   4      21.997  32.268  23.654  1.00  0.00           C  
ATOM     11  C   PHE A   4      23.014  31.129  23.560  1.00  0.00           C  
ATOM     12  O   PHE A   4      22.691  29.964  23.778  1.00  0.00           O  
ATOM     13  N   VAL A   5      24.249  31.478  23.212  1.00  0.00           N  
ATOM     14  CA  VAL A   5      25.409  30.608  23.303  1.00  0.00           C  
ATOM     15  C   VAL A   5      26.350  31.315  24.286  1.00  0.00           C  
ATOM     16  O   VAL A   5      26.828  32.413  23.993  1.00  0.00           O  
ATOM     17  N   LYS A   6      26.473  30.754  25.476  1.00  0.00           N  
ATOM     18  CA  LYS A   6      27.413  31.295  26.435  1.00  0.00           C  
ATOM     19  C   LYS A   6      28.817  30.712  26.234  1.00  0.00           C  
ATOM     20  O   LYS A   6      29.070  29.512  26.336  1.00  0.00           O  
ATOM     21  N   THR A   7      29.851  31.552  26.206  1.00  0.00           N  
ATOM     22  CA  THR A   7      31.192  31.093  25.912  1.00  0.00           C  
ATOM     23  C   THR A   7      31.884  30.916  27.262  1.00  0.00           C  
ATOM     24  O   THR A   7      31.528  31.496  28.291  1.00  0.00           O  
ATOM     25  N   LEU A   8      32.944  30.102  27.219  1.00  0.00           N  
ATOM     26  CA  LEU A   8      33.793  29.709  28.326  1.00  0.00           C  
ATOM     27  C   LEU A   8      34.408  30.963  28.955  1.00  0.00           C  
ATOM     28  O   LEU A   8      34.592  31.027  30.168  1.00  0.00           O  
ATOM     29  N   THR A   9      34.902  31.848  28.100  1.00  0.00           N  
ATOM     30  CA  THR A   9      35.548  33.120  28.332  1.00  0.00           C  
ATOM     31  C   THR A   9      34.632  34.259  28.774  1.00  0.00           C  
ATOM     32  O   THR A   9      35.025  35.421  28.894  1.00  0.00           O  
ATOM     33  N   GLY A  10      33.331  34.100  28.998  1.00  0.00           N  
ATOM     34  CA  GLY A  10      32.382  34.917  29.714  1.00  0.00           C  
ATOM     35  C   GLY A  10      31.460  35.712  28.792  1.00  0.00           C  
ATOM     36  O   GLY A  10      30.535  36.319  29.330  1.00  0.00           O  
ATOM     37  N   LYS A  11      31.664  35.770  27.482  1.00  0.00           N  
ATOM     38  CA  LYS A  11      30.671  36.482  26.693  1.00  0.00           C  
ATOM     39  C   LYS A  11      29.426  35.629  26.443  1.00  0.00           C  
ATOM     40  O   LYS A  11      29.595  34.413  26.342  1.00  0.00           O  
ATOM     41  N   THR A  12      28.278  36.278  26.298  1.00  0.00           N  
ATOM     42  CA  THR A  12      27.133  35.651  25.669  1.00  0.00           C  
ATOM     43  C   THR A  12      26.897  36.192  24.266  1.00  0.00           C  
ATOM     44  O   THR A  12      27.029  37.381  23.997  1.00  0.00           O  
ATOM     45  N   ILE A  13      26.702  35.403  23.211  1.00  0.00           N  
ATOM     46  CA  ILE A  13      26.241  35.776  21.887  1.00  0.00           C  
ATOM     47  C   ILE A  13      24.782  35.319  21.819  1.00  0.00           C  
ATOM     48  O   ILE A  13      24.312  34.431  22.524  1.00  0.00           O  
ATOM     49  N   THR A  14      24.033  35.851  20.855  1.00  0.00           N  
ATOM     50  CA  THR A  14      22.603  35.709  20.665  1.00  0.00           C  
ATOM     51  C   THR A  14      22.418  35.146  19.250  1.00  0.00           C  
ATOM     52  O   THR A  14      22.796  35.782  18.268  1.00  0.00           O  
ATOM     53  N   LEU A  15      21.989  33.897  19.102  1.00  0.00           N  
ATOM     54  CA  LEU A  15      21.868  33.124  17.875  1.00  0.00           C  
ATOM     55  C   LEU A  15      20.402  33.036  17.462  1.00  0.00           C  
ATOM     56  O   LEU A  15      19.566  32.647  18.276  1.00  0.00           O  
ATOM     57  N   GLU A  16      20.231  33.179  16.146  1.00  0.00           N  
ATOM     58  CA  GLU A  16      19.071  32.736  15.406  1.00  0.00           C  
ATOM     59  C   GLU A  16      19.310  31.299  14.928  1.00  0.00           C  
ATOM     60  O   GLU A  16      20.373  30.877  14.496  1.00  0.00           O  
ATOM     61  N   VAL A  17      18.315  30.437  15.063  1.00  0.00           N  
ATOM     62  CA  VAL A  17      18.287  29.003  14.858  1.00  0.00           C  
ATOM     63  C   VAL A  17      16.864  28.629  14.422  1.00  0.00           C  
ATOM     64  O   VAL A  17      15.949  29.336  14.823  1.00  0.00           O  
ATOM     65  N   GLU A  18      16.684  27.587  13.612  1.00  0.00           N  
ATOM     66  CA  GLU A  18      15.453  26.873  13.339  1.00  0.00           C  
ATOM     67  C   GLU A  18      15.539  25.592  14.168  1.00  0.00           C  
ATOM     68  O   GLU A  18      16.624  25.016  14.279  1.00  0.00           O  
ATOM     69  N   PRO A  19      14.411  25.171  14.733  1.00  0.00           N  
ATOM     70  CA  PRO A  19      14.316  23.843  15.320  1.00  0.00           C  
ATOM     71  C   PRO A  19      14.990  22.663  14.633  1.00  0.00           C  
ATOM     72  O   PRO A  19      15.396  21.716  15.307  1.00  0.00           O  
ATOM     73  N   SER A  20      14.860  22.604  13.310  1.00  0.00           N  
ATOM     74  CA  SER A  20      15.264  21.541  12.412  1.00  0.00           C  
ATOM     75  C   SER A  20      16.709  21.753  11.972  1.00  0.00           C  
ATOM     76  O   SER A  20      17.207  20.998  11.139  1.00  0.00           O  
ATOM     77  N   ASP A  21      17.492  22.611  12.621  1.00  0.00           N  
ATOM     78  CA  ASP A  21      18.903  22.817  12.344  1.00  0.00           C  
ATOM     79  C   ASP A  21      19.646  21.804  13.213  1.00  0.00           C  
ATOM     80  O   ASP A  21      19.338  21.503  14.366  1.00  0.00           O  
ATOM     81  N   THR A  22      20.790  21.454  12.641  1.00  0.00           N  
ATOM     82  CA  THR A  22      21.754  20.575  13.284  1.00  0.00           C  
ATOM     83  C   THR A  22      22.703  21.388  14.169  1.00  0.00           C  
ATOM     84  O   THR A  22      22.908  22.565  13.874  1.00  0.00           O  
ATOM     85  N   ILE A  23      23.141  20.795  15.273  1.00  0.00           N  
ATOM     86  CA  ILE A  23      24.067  21.437  16.175  1.00  0.00           C  
ATOM     87  C   ILE A  23      25.359  21.853  15.474  1.00  0.00           C  
ATOM     88  O   ILE A  23      25.994  22.821  15.898  1.00  0.00           O  
ATOM     89  N   GLU A  24      25.730  21.203  14.376  1.00  0.00           N  
ATOM     90  CA  GLU A  24      26.823  21.516  13.472  1.00  0.00           C  
ATOM     91  C   GLU A  24      26.515  22.795  12.687  1.00  0.00           C  
ATOM     92  O   GLU A  24      27.450  23.538  12.407  1.00  0.00           O  
ATOM     93  N   ASN A  25      25.261  23.052  12.347  1.00  0.00           N  
ATOM     94  CA  ASN A  25      24.854  24.260  11.651  1.00  0.00           C  
ATOM     95  C   ASN A  25      24.953  25.410  12.644  1.00  0.00           C  
ATOM     96  O   ASN A  25      25.278  26.487  12.137  1.00  0.00           O  
ATOM     97  N   VAL A  26      24.743  25.281  13.955  1.00  0.00           N  
ATOM     98  CA  VAL A  26      24.826  26.406  14.860  1.00  0.00           C  
ATOM     99  C   VAL A  26      26.308  26.666  15.144  1.00  0.00           C  
ATOM    100  O   VAL A  26      26.659  27.829  15.343  1.00  0.00           O  
ATOM    101  N   LYS A  27      27.174  25.666  15.195  1.00  0.00           N  
ATOM    102  CA  LYS A  27      28.622  25.749  15.212  1.00  0.00           C  
ATOM    103  C   LYS A  27      29.129  26.558  14.014  1.00  0.00           C  
ATOM    104  O   LYS A  27      29.920  27.446  14.344  1.00  0.00           O  
ATOM    105  N   ALA A  28      28.781  26.387  12.743  1.00  0.00           N  
ATOM    106  CA  ALA A  28      28.891  27.435  11.745  1.00  0.00           C  
ATOM    107  C   ALA A  28      28.444  28.863  12.097  1.00  0.00           C  
ATOM    108  O   ALA A  28      29.056  29.888  11.820  1.00  0.00           O  
ATOM    109  N   LYS A  29      27.222  29.006  12.598  1.00  0.00           N  
ATOM    110  CA  LYS A  29      26.508  30.256  12.796  1.00  0.00           C  
ATOM    111  C   LYS A  29      26.976  31.136  13.968  1.00  0.00           C  
ATOM    112  O   LYS A  29      27.003  32.356  13.852  1.00  0.00           O  
ATOM    113  N   ILE A  30      27.628  30.523  14.951  1.00  0.00           N  
ATOM    114  CA  ILE A  30      28.527  31.038  15.954  1.00  0.00           C  
ATOM    115  C   ILE A  30      29.841  31.567  15.377  1.00  0.00           C  
ATOM    116  O   ILE A  30      30.249  32.628  15.869  1.00  0.00           O  
ATOM    117  N   GLN A  31      30.477  30.974  14.381  1.00  0.00           N  
ATOM    118  CA  GLN A  31      31.716  31.392  13.769  1.00  0.00           C  
ATOM    119  C   GLN A  31      31.478  32.684  12.984  1.00  0.00           C  
ATOM    120  O   GLN A  31      32.459  33.426  12.868  1.00  0.00           O  
ATOM    121  N   ASP A  32      30.240  32.873  12.534  1.00  0.00           N  
ATOM    122  CA  ASP A  32      29.873  34.093  11.837  1.00  0.00           C  
ATOM    123  C   ASP A  32      29.871  35.276  12.811  1.00  0.00           C  
ATOM    124  O   ASP A  32      30.432  36.327  12.519  1.00  0.00           O  
ATOM    125  N   LYS A  33      29.337  35.063  14.003  1.00  0.00           N  
ATOM    126  CA  LYS A  33      29.361  36.093  15.023  1.00  0.00           C  
ATOM    127  C   LYS A  33      30.704  36.294  15.727  1.00  0.00           C  
ATOM    128  O   LYS A  33      31.232  37.405  15.809  1.00  0.00           O  
ATOM    129  N   GLU A  34      31.376  35.202  16.070  1.00  0.00           N  
ATOM    130  CA  GLU A  34      32.410  35.199  17.090  1.00  0.00           C  
ATOM    131  C   GLU A  34      33.668  34.515  16.556  1.00  0.00           C  
ATOM    132  O   GLU A  34      34.590  34.252  17.320  1.00  0.00           O  
ATOM    133  N   GLY A  35      33.792  34.110  15.288  1.00  0.00           N  
ATOM    134  CA  GLY A  35      35.038  33.735  14.662  1.00  0.00           C  
ATOM    135  C   GLY A  35      35.790  32.439  14.980  1.00  0.00           C  
ATOM    136  O   GLY A  35      36.922  32.279  14.519  1.00  0.00           O  
ATOM    137  N   ILE A  36      35.251  31.644  15.900  1.00  0.00           N  
ATOM    138  CA  ILE A  36      35.780  30.447  16.508  1.00  0.00           C  
ATOM    139  C   ILE A  36      35.579  29.347  15.473  1.00  0.00           C  
ATOM    140  O   ILE A  36      34.419  29.016  15.232  1.00  0.00           O  
ATOM    141  N   PRO A  37      36.633  28.752  14.917  1.00  0.00           N  
ATOM    142  CA  PRO A  37      36.581  27.593  14.039  1.00  0.00           C  
ATOM    143  C   PRO A  37      35.705  26.485  14.623  1.00  0.00           C  
ATOM    144  O   PRO A  37      35.893  26.242  15.815  1.00  0.00           O  
ATOM    145  N   PRO A  38      34.784  25.773  13.976  1.00  0.00           N  
ATOM    146  CA  PRO A  38      33.853  24.805  14.495  1.00  0.00           C  
ATOM    147  C   PRO A  38      34.487  23.523  15.050  1.00  0.00           C  
ATOM    148  O   PRO A  38      34.110  23.031  16.109  1.00  0.00           O  
ATOM    149  N   ASP A  39      35.549  23.029  14.427  1.00  0.00           N  
ATOM    150  CA  ASP A  39      36.569  22.117  14.915  1.00  0.00           C  
ATOM    151  C   ASP A  39      37.029  22.343  16.364  1.00  0.00           C  
ATOM    152  O   ASP A  39      37.432  21.431  17.073  1.00  0.00           O  
ATOM    153  N   GLN A  40      37.029  23.577  16.844  1.00  0.00           N  
ATOM    154  CA  GLN A  40      37.451  23.798  18.211  1.00  0.00           C  
ATOM    155  C   GLN A  40      36.306  23.926  19.225  1.00  0.00           C  
ATOM    156  O   GLN A  40      36.489  23.776  20.431  1.00  0.00           O  
ATOM    157  N   GLN A  41      35.079  24.099  18.738  1.00  0.00           N  
ATOM    158  CA  GLN A  41      33.895  24.341  19.528  1.00  0.00           C  
ATOM    159  C   GLN A  41      33.412  22.984  20.035  1.00  0.00           C  
ATOM    160  O   GLN A  41      33.337  22.052  19.251  1.00  0.00           O  
ATOM    161  N   ARG A  42      32.908  22.972  21.266  1.00  0.00           N  
ATOM    162  CA  ARG A  42      31.973  21.942  21.654  1.00  0.00           C  
ATOM    163  C   ARG A  42      30.762  22.665  22.234  1.00  0.00           C  
ATOM    164  O   ARG A  42      30.968  23.627  22.977  1.00  0.00           O  
ATOM    165  N   LEU A  43      29.500  22.444  21.880  1.00  0.00           N  
ATOM    166  CA  LEU A  43      28.326  22.960  22.546  1.00  0.00           C  
ATOM    167  C   LEU A  43      27.829  21.869  23.506  1.00  0.00           C  
ATOM    168  O   LEU A  43      27.744  20.736  23.048  1.00  0.00           O  
ATOM    169  N   ILE A  44      27.527  22.241  24.743  1.00  0.00           N  
ATOM    170  CA  ILE A  44      26.975  21.428  25.807  1.00  0.00           C  
ATOM    171  C   ILE A  44      25.725  22.215  26.224  1.00  0.00           C  
ATOM    172  O   ILE A  44      25.614  23.429  26.044  1.00  0.00           O  
ATOM    173  N   PHE A  45      24.671  21.549  26.700  1.00  0.00           N  
ATOM    174  CA  PHE A  45      23.486  22.125  27.295  1.00  0.00           C  
ATOM    175  C   PHE A  45      23.340  21.794  28.783  1.00  0.00           C  
ATOM    176  O   PHE A  45      22.705  22.494  29.569  1.00  0.00           O  
ATOM    177  N   ALA A  46      23.954  20.666  29.109  1.00  0.00           N  
ATOM    178  CA  ALA A  46      23.796  20.050  30.409  1.00  0.00           C  
ATOM    179  C   ALA A  46      25.104  19.420  30.871  1.00  0.00           C  
ATOM    180  O   ALA A  46      26.121  20.105  30.958  1.00  0.00           O  
ATOM    181  N   GLY A  47      25.075  18.120  31.182  1.00  0.00           N  
ATOM    182  CA  GLY A  47      26.138  17.450  31.896  1.00  0.00           C  
ATOM    183  C   GLY A  47      26.851  16.406  31.036  1.00  0.00           C  
ATOM    184  O   GLY A  47      27.432  15.447  31.536  1.00  0.00           O  
ATOM    185  N   LYS A  48      26.735  16.449  29.717  1.00  0.00           N  
ATOM    186  CA  LYS A  48      27.392  15.597  28.743  1.00  0.00           C  
ATOM    187  C   LYS A  48      27.575  16.342  27.422  1.00  0.00           C  
ATOM    188  O   LYS A  48      26.847  17.295  27.171  1.00  0.00           O  
ATOM    189  N   GLN A  49      28.577  15.922  26.644  1.00  0.00           N  
ATOM    190  CA  GLN A  49      28.780  16.282  25.255  1.00  0.00           C  
ATOM    191  C   GLN A  49      27.579  15.915  24.370  1.00  0.00           C  
ATOM    192  O   GLN A  49      26.703  15.147  24.737  1.00  0.00           O  
ATOM    193  N   LEU A  50      27.410  16.584  23.232  1.00  0.00           N  
ATOM    194  CA  LEU A  50      26.311  16.436  22.295  1.00  0.00           C  
ATOM    195  C   LEU A  50      26.889  16.016  20.944  1.00  0.00           C  
ATOM    196  O   LEU A  50      28.102  16.104  20.739  1.00  0.00           O  
ATOM    197  N   GLU A  51      26.047  15.491  20.056  1.00  0.00           N  
ATOM    198  CA  GLU A  51      26.490  15.139  18.720  1.00  0.00           C  
ATOM    199  C   GLU A  51      25.979  16.184  17.732  1.00  0.00           C  
ATOM    200  O   GLU A  51      24.809  16.590  17.726  1.00  0.00           O  
ATOM    201  N   ASP A  52      26.780  16.571  16.734  1.00  0.00           N  
ATOM    202  CA  ASP A  52      26.581  17.584  15.722  1.00  0.00           C  
ATOM    203  C   ASP A  52      25.483  17.260  14.702  1.00  0.00           C  
ATOM    204  O   ASP A  52      24.849  18.118  14.095  1.00  0.00           O  
ATOM    205  N   GLY A  53      25.216  15.966  14.547  1.00  0.00           N  
ATOM    206  CA  GLY A  53      24.272  15.557  13.526  1.00  0.00           C  
ATOM    207  C   GLY A  53      23.003  15.072  14.229  1.00  0.00           C  
ATOM    208  O   GLY A  53      22.431  14.057  13.815  1.00  0.00           O  
ATOM    209  N   ARG A  54      22.582  15.763  15.278  1.00  0.00           N  
ATOM    210  CA  ARG A  54      21.243  15.592  15.816  1.00  0.00           C  
ATOM    211  C   ARG A  54      20.732  17.030  15.930  1.00  0.00           C  
ATOM    212  O   ARG A  54      21.462  17.984  16.186  1.00  0.00           O  
ATOM    213  N   THR A  55      19.431  17.294  15.831  1.00  0.00           N  
ATOM    214  CA  THR A  55      18.903  18.636  15.676  1.00  0.00           C  
ATOM    215  C   THR A  55      18.468  19.222  17.016  1.00  0.00           C  
ATOM    216  O   THR A  55      18.219  18.426  17.916  1.00  0.00           O  
ATOM    217  N   LEU A  56      18.305  20.538  17.101  1.00  0.00           N  
ATOM    218  CA  LEU A  56      17.878  21.269  18.275  1.00  0.00           C  
ATOM    219  C   LEU A  56      16.547  20.712  18.805  1.00  0.00           C  
ATOM    220  O   LEU A  56      16.365  20.473  19.993  1.00  0.00           O  
ATOM    221  N   SER A  57      15.623  20.454  17.892  1.00  0.00           N  
ATOM    222  CA  SER A  57      14.386  19.737  18.167  1.00  0.00           C  
ATOM    223  C   SER A  57      14.529  18.304  18.667  1.00  0.00           C  
ATOM    224  O   SER A  57      13.730  17.945  19.529  1.00  0.00           O  
ATOM    225  N   ASP A  58      15.433  17.467  18.156  1.00  0.00           N  
ATOM    226  CA  ASP A  58      15.815  16.126  18.538  1.00  0.00           C  
ATOM    227  C   ASP A  58      16.222  15.967  20.008  1.00  0.00           C  
ATOM    228  O   ASP A  58      16.001  14.937  20.653  1.00  0.00           O  
ATOM    229  N   TYR A  59      16.829  16.999  20.582  1.00  0.00           N  
ATOM    230  CA  TYR A  59      17.176  17.091  21.988  1.00  0.00           C  
ATOM    231  C   TYR A  59      16.164  17.937  22.768  1.00  0.00           C  
ATOM    232  O   TYR A  59      16.417  18.259  23.931  1.00  0.00           O  
ATOM    233  N   ASN A  60      15.147  18.455  22.101  1.00  0.00           N  
ATOM    234  CA  ASN A  60      14.092  19.329  22.571  1.00  0.00           C  
ATOM    235  C   ASN A  60      14.504  20.649  23.223  1.00  0.00           C  
ATOM    236  O   ASN A  60      13.868  21.036  24.202  1.00  0.00           O  
ATOM    237  N   ILE A  61      15.570  21.283  22.732  1.00  0.00           N  
ATOM    238  CA  ILE A  61      16.131  22.552  23.155  1.00  0.00           C  
ATOM    239  C   ILE A  61      15.210  23.581  22.490  1.00  0.00           C  
ATOM    240  O   ILE A  61      15.031  23.649  21.276  1.00  0.00           O  
ATOM    241  N   GLN A  62      14.531  24.332  23.348  1.00  0.00           N  
ATOM    242  CA  GLN A  62      13.475  25.270  23.027  1.00  0.00           C  
ATOM    243  C   GLN A  62      14.028  26.694  23.099  1.00  0.00           C  
ATOM    244  O   GLN A  62      15.170  26.897  23.492  1.00  0.00           O  
ATOM    245  N   LYS A  63      13.227  27.646  22.613  1.00  0.00           N  
ATOM    246  CA  LYS A  63      13.534  29.063  22.516  1.00  0.00           C  
ATOM    247  C   LYS A  63      14.061  29.664  23.826  1.00  0.00           C  
ATOM    248  O   LYS A  63      13.561  29.436  24.920  1.00  0.00           O  
ATOM    249  N   GLU A  64      15.138  30.444  23.798  1.00  0.00           N  
ATOM    250  CA  GLU A  64      15.806  31.153  24.863  1.00  0.00           C  
ATOM    251  C   GLU A  64      16.590  30.281  25.843  1.00  0.00           C  
ATOM    252  O   GLU A  64      17.172  30.777  26.806  1.00  0.00           O  
ATOM    253  N   SER A  65      16.789  29.024  25.485  1.00  0.00           N  
ATOM    254  CA  SER A  65      17.811  28.194  26.102  1.00  0.00           C  
ATOM    255  C   SER A  65      19.223  28.749  25.910  1.00  0.00           C  
ATOM    256  O   SER A  65      19.410  29.276  24.807  1.00  0.00           O  
ATOM    257  N   THR A  66      20.105  28.581  26.891  1.00  0.00           N  
ATOM    258  CA  THR A  66      21.527  28.851  26.816  1.00  0.00           C  
ATOM    259  C   THR A  66      22.185  27.483  26.655  1.00  0.00           C  
ATOM    260  O   THR A  66      22.026  26.548  27.429  1.00  0.00           O  
ATOM    261  N   LEU A  67      23.089  27.361  25.683  1.00  0.00           N  
ATOM    262  CA  LEU A  67      24.081  26.313  25.594  1.00  0.00           C  
ATOM    263  C   LEU A  67      25.457  26.916  25.889  1.00  0.00           C  
ATOM    264  O   LEU A  67      25.714  28.119  25.805  1.00  0.00           O  
ATOM    265  N   HIS A  68      26.381  26.117  26.416  1.00  0.00           N  
ATOM    266  CA  HIS A  68      27.681  26.523  26.893  1.00  0.00           C  
ATOM    267  C   HIS A  68      28.686  25.954  25.885  1.00  0.00           C  
ATOM    268  O   HIS A  68      28.561  24.819  25.426  1.00  0.00           O  
ATOM    269  N   LEU A  69      29.527  26.880  25.441  1.00  0.00           N  
ATOM    270  CA  LEU A  69      30.467  26.692  24.359  1.00  0.00           C  
ATOM    271  C   LEU A  69      31.889  26.570  24.925  1.00  0.00           C  
ATOM    272  O   LEU A  69      32.451  27.585  25.348  1.00  0.00           O  
ATOM    273  N   VAL A  70      32.424  25.355  24.989  1.00  0.00           N  
ATOM    274  CA  VAL A  70      33.818  25.127  25.288  1.00  0.00           C  
ATOM    275  C   VAL A  70      34.668  25.271  24.027  1.00  0.00           C  
ATOM    276  O   VAL A  70      34.293  24.969  22.897  1.00  0.00           O  
TER
ENDMDL
MODEL      10
ATOM      1  N   GLN A   2      14.926  32.423  19.593  1.00  0.00           N  
ATOM      2  CA  GLN A   2      16.117  33.117  20.045  1.00  0.00           C  
ATOM      3  C   GLN A   2      16.735  32.262  21.142  1.00  0.00           C  
ATOM      4  O   GLN A   2      16.003  31.732  21.987  1.00  0.00           O  
ATOM      5  N   ILE A   3      18.047  32.087  21.110  1.00  0.00           N  
ATOM      6  CA  ILE A   3      18.820  31.552  22.214  1.00  0.00           C  
ATOM      7  C   ILE A   3      20.085  32.363  22.472  1.00  0.00           C  
ATOM      8  O   ILE A   3      20.538  33.047  21.559  1.00  0.00           O  
ATOM      9  N   PHE A   4      20.679  32.160  23.645  1.00  0.00           N  
ATOM     10  CA  PHE A   4      22.088  32.377  23.942  1.00  0.00           C  
ATOM     11  C   PHE A   4      22.888  31.101  23.684  1.00  0.00           C  
ATOM     12  O   PHE A   4      22.709  30.105  24.382  1.00  0.00           O  
ATOM     13  N   VAL A   5      23.967  31.279  22.933  1.00  0.00           N  
ATOM     14  CA  VAL A   5      25.155  30.452  23.059  1.00  0.00           C  
ATOM     15  C   VAL A   5      26.023  31.286  24.006  1.00  0.00           C  
ATOM     16  O   VAL A   5      26.340  32.407  23.626  1.00  0.00           O  
ATOM     17  N   LYS A   6      26.262  30.881  25.254  1.00  0.00           N  
ATOM     18  CA  LYS A   6      27.225  31.507  26.146  1.00  0.00           C  
ATOM     19  C   LYS A   6      28.535  30.726  26.168  1.00  0.00           C  
ATOM     20  O   LYS A   6      28.673  29.498  26.204  1.00  0.00           O  
ATOM     21  N   THR A   7      29.590  31.531  26.062  1.00  0.00           N  
ATOM     22  CA  THR A   7      30.933  30.993  26.130  1.00  0.00           C  
ATOM     23  C   THR A   7      31.385  30.977  27.598  1.00  0.00           C  
ATOM     24  O   THR A   7      31.140  31.933  28.324  1.00  0.00           O  
ATOM     25  N   LEU A   8      32.095  29.929  27.983  1.00  0.00           N  
ATOM     26  CA  LEU A   8      32.859  29.998  29.220  1.00  0.00           C  
ATOM     27  C   LEU A   8      34.010  31.009  29.240  1.00  0.00           C  
ATOM     28  O   LEU A   8      34.683  31.157  30.260  1.00  0.00           O  
ATOM     29  N   THR A   9      34.419  31.609  28.123  1.00  0.00           N  
ATOM     30  CA  THR A   9      35.351  32.720  28.124  1.00  0.00           C  
ATOM     31  C   THR A   9      34.743  34.073  28.477  1.00  0.00           C  
ATOM     32  O   THR A   9      35.561  34.981  28.627  1.00  0.00           O  
ATOM     33  N   GLY A  10      33.421  34.241  28.453  1.00  0.00           N  
ATOM     34  CA  GLY A  10      32.725  35.291  29.161  1.00  0.00           C  
ATOM     35  C   GLY A  10      31.758  36.083  28.285  1.00  0.00           C  
ATOM     36  O   GLY A  10      31.022  36.923  28.807  1.00  0.00           O  
ATOM     37  N   LYS A  11      31.810  35.930  26.961  1.00  0.00           N  
ATOM     38  CA  LYS A  11      30.950  36.593  26.003  1.00  0.00           C  
ATOM     39  C   LYS A  11      29.622  35.848  25.866  1.00  0.00           C  
ATOM     40  O   LYS A  11      29.650  34.623  25.744  1.00  0.00           O  
ATOM     41  N   THR A  12      28.477  36.528  25.812  1.00  0.00           N  
ATOM     42  CA  THR A  12      27.180  35.956  25.502  1.00  0.00           C  
ATOM     43  C   THR A  12      26.931  36.223  24.016  1.00  0.00           C  
ATOM     44  O   THR A  12      26.906  37.334  23.490  1.00  0.00           O  
ATOM     45  N   ILE A  13      26.635  35.203  23.219  1.00  0.00           N  
ATOM     46  CA  ILE A  13      26.466  35.251  21.779  1.00  0.00           C  
ATOM     47  C   ILE A  13      24.970  34.951  21.635  1.00  0.00           C  
ATOM     48  O   ILE A  13      24.563  33.798  21.799  1.00  0.00           O  
ATOM     49  N   THR A  14      24.149  35.939  21.319  1.00  0.00           N  
ATOM     50  CA  THR A  14      22.858  35.686  20.725  1.00  0.00           C  
ATOM     51  C   THR A  14      22.986  34.947  19.393  1.00  0.00           C  
ATOM     52  O   THR A  14      23.836  35.233  18.549  1.00  0.00           O  
ATOM     53  N   LEU A  15      22.129  33.958  19.185  1.00  0.00           N  
ATOM     54  CA  LEU A  15      21.983  33.120  18.011  1.00  0.00           C  
ATOM     55  C   LEU A  15      20.497  32.963  17.688  1.00  0.00           C  
ATOM     56  O   LEU A  15      19.662  32.943  18.585  1.00  0.00           O  
ATOM     57  N   GLU A  16      20.202  32.991  16.386  1.00  0.00           N  
ATOM     58  CA  GLU A  16      18.864  32.777  15.874  1.00  0.00           C  
ATOM     59  C   GLU A  16      18.982  31.435  15.154  1.00  0.00           C  
ATOM     60  O   GLU A  16      19.826  31.242  14.279  1.00  0.00           O  
ATOM     61  N   VAL A  17      18.190  30.438  15.541  1.00  0.00           N  
ATOM     62  CA  VAL A  17      18.143  29.080  15.058  1.00  0.00           C  
ATOM     63  C   VAL A  17      16.656  28.789  14.856  1.00  0.00           C  
ATOM     64  O   VAL A  17      15.774  29.222  15.589  1.00  0.00           O  
ATOM     65  N   GLU A  18      16.419  27.735  14.079  1.00  0.00           N  
ATOM     66  CA  GLU A  18      15.160  27.014  14.055  1.00  0.00           C  
ATOM     67  C   GLU A  18      15.449  25.651  14.663  1.00  0.00           C  
ATOM     68  O   GLU A  18      16.618  25.274  14.770  1.00  0.00           O  
ATOM     69  N   PRO A  19      14.437  24.888  15.101  1.00  0.00           N  
ATOM     70  CA  PRO A  19      14.659  23.761  15.975  1.00  0.00           C  
ATOM     71  C   PRO A  19      14.922  22.504  15.130  1.00  0.00           C  
ATOM     72  O   PRO A  19      15.534  21.554  15.602  1.00  0.00           O  
ATOM     73  N   SER A  20      14.511  22.443  13.862  1.00  0.00           N  
ATOM     74  CA  SER A  20      14.993  21.560  12.820  1.00  0.00           C  
ATOM     75  C   SER A  20      16.408  21.785  12.298  1.00  0.00           C  
ATOM     76  O   SER A  20      16.892  21.019  11.455  1.00  0.00           O  
ATOM     77  N   ASP A  21      17.104  22.836  12.711  1.00  0.00           N  
ATOM     78  CA  ASP A  21      18.460  23.023  12.231  1.00  0.00           C  
ATOM     79  C   ASP A  21      19.439  22.012  12.828  1.00  0.00           C  
ATOM     80  O   ASP A  21      19.439  21.730  14.020  1.00  0.00           O  
ATOM     81  N   THR A  22      20.317  21.487  11.975  1.00  0.00           N  
ATOM     82  CA  THR A  22      21.481  20.676  12.267  1.00  0.00           C  
ATOM     83  C   THR A  22      22.500  21.400  13.148  1.00  0.00           C  
ATOM     84  O   THR A  22      22.874  22.540  12.900  1.00  0.00           O  
ATOM     85  N   ILE A  23      23.128  20.661  14.056  1.00  0.00           N  
ATOM     86  CA  ILE A  23      24.339  21.051  14.738  1.00  0.00           C  
ATOM     87  C   ILE A  23      25.483  21.626  13.889  1.00  0.00           C  
ATOM     88  O   ILE A  23      26.037  22.617  14.363  1.00  0.00           O  
ATOM     89  N   GLU A  24      25.626  21.242  12.631  1.00  0.00           N  
ATOM     90  CA  GLU A  24      26.448  21.759  11.550  1.00  0.00           C  
ATOM     91  C   GLU A  24      26.153  23.249  11.404  1.00  0.00           C  
ATOM     92  O   GLU A  24      27.074  24.048  11.585  1.00  0.00           O  
ATOM     93  N   ASN A  25      24.899  23.650  11.195  1.00  0.00           N  
ATOM     94  CA  ASN A  25      24.492  24.993  10.861  1.00  0.00           C  
ATOM     95  C   ASN A  25      24.558  25.931  12.071  1.00  0.00           C  
ATOM     96  O   ASN A  25      24.602  27.136  11.830  1.00  0.00           O  
ATOM     97  N   VAL A  26      24.384  25.379  13.274  1.00  0.00           N  
ATOM     98  CA  VAL A  26      24.409  26.022  14.569  1.00  0.00           C  
ATOM     99  C   VAL A  26      25.820  26.453  14.959  1.00  0.00           C  
ATOM    100  O   VAL A  26      25.954  27.615  15.347  1.00  0.00           O  
ATOM    101  N   LYS A  27      26.806  25.568  14.891  1.00  0.00           N  
ATOM    102  CA  LYS A  27      28.233  25.800  14.997  1.00  0.00           C  
ATOM    103  C   LYS A  27      28.754  26.831  13.997  1.00  0.00           C  
ATOM    104  O   LYS A  27      29.660  27.525  14.440  1.00  0.00           O  
ATOM    105  N   ALA A  28      28.419  26.846  12.710  1.00  0.00           N  
ATOM    106  CA  ALA A  28      28.886  27.660  11.614  1.00  0.00           C  
ATOM    107  C   ALA A  28      28.573  29.158  11.729  1.00  0.00           C  
ATOM    108  O   ALA A  28      29.102  30.020  11.035  1.00  0.00           O  
ATOM    109  N   LYS A  29      27.622  29.449  12.621  1.00  0.00           N  
ATOM    110  CA  LYS A  29      27.179  30.804  12.878  1.00  0.00           C  
ATOM    111  C   LYS A  29      28.238  31.470  13.761  1.00  0.00           C  
ATOM    112  O   LYS A  29      28.395  32.659  13.505  1.00  0.00           O  
ATOM    113  N   ILE A  30      28.918  30.743  14.645  1.00  0.00           N  
ATOM    114  CA  ILE A  30      29.776  31.286  15.674  1.00  0.00           C  
ATOM    115  C   ILE A  30      31.122  31.633  15.036  1.00  0.00           C  
ATOM    116  O   ILE A  30      31.739  32.568  15.551  1.00  0.00           O  
ATOM    117  N   GLN A  31      31.441  31.019  13.902  1.00  0.00           N  
ATOM    118  CA  GLN A  31      32.484  31.363  12.947  1.00  0.00           C  
ATOM    119  C   GLN A  31      32.210  32.682  12.215  1.00  0.00           C  
ATOM    120  O   GLN A  31      33.123  33.495  12.119  1.00  0.00           O  
ATOM    121  N   ASP A  32      30.959  32.993  11.909  1.00  0.00           N  
ATOM    122  CA  ASP A  32      30.546  34.269  11.366  1.00  0.00           C  
ATOM    123  C   ASP A  32      30.526  35.361  12.441  1.00  0.00           C  
ATOM    124  O   ASP A  32      30.784  36.536  12.178  1.00  0.00           O  
ATOM    125  N   LYS A  33      30.205  35.020  13.682  1.00  0.00           N  
ATOM    126  CA  LYS A  33      30.001  35.943  14.771  1.00  0.00           C  
ATOM    127  C   LYS A  33      31.354  36.342  15.358  1.00  0.00           C  
ATOM    128  O   LYS A  33      31.911  37.382  15.027  1.00  0.00           O  
ATOM    129  N   GLU A  34      31.948  35.464  16.155  1.00  0.00           N  
ATOM    130  CA  GLU A  34      33.221  35.720  16.787  1.00  0.00           C  
ATOM    131  C   GLU A  34      34.421  35.052  16.101  1.00  0.00           C  
ATOM    132  O   GLU A  34      35.522  35.482  16.443  1.00  0.00           O  
ATOM    133  N   GLY A  35      34.265  34.078  15.216  1.00  0.00           N  
ATOM    134  CA  GLY A  35      35.420  33.570  14.507  1.00  0.00           C  
ATOM    135  C   GLY A  35      35.825  32.207  15.061  1.00  0.00           C  
ATOM    136  O   GLY A  35      36.690  31.588  14.444  1.00  0.00           O  
ATOM    137  N   ILE A  36      35.155  31.683  16.079  1.00  0.00           N  
ATOM    138  CA  ILE A  36      35.589  30.377  16.551  1.00  0.00           C  
ATOM    139  C   ILE A  36      35.077  29.356  15.542  1.00  0.00           C  
ATOM    140  O   ILE A  36      33.913  29.516  15.189  1.00  0.00           O  
ATOM    141  N   PRO A  37      35.821  28.402  14.990  1.00  0.00           N  
ATOM    142  CA  PRO A  37      35.398  27.488  13.953  1.00  0.00           C  
ATOM    143  C   PRO A  37      34.604  26.312  14.536  1.00  0.00           C  
ATOM    144  O   PRO A  37      34.976  25.882  15.621  1.00  0.00           O  
ATOM    145  N   PRO A  38      33.653  25.704  13.843  1.00  0.00           N  
ATOM    146  CA  PRO A  38      33.131  24.424  14.270  1.00  0.00           C  
ATOM    147  C   PRO A  38      34.090  23.366  14.825  1.00  0.00           C  
ATOM    148  O   PRO A  38      33.743  22.713  15.803  1.00  0.00           O  
ATOM    149  N   ASP A  39      35.297  23.250  14.276  1.00  0.00           N  
ATOM    150  CA  ASP A  39      36.371  22.389  14.741  1.00  0.00           C  
ATOM    151  C   ASP A  39      36.605  22.435  16.252  1.00  0.00           C  
ATOM    152  O   ASP A  39      36.694  21.393  16.893  1.00  0.00           O  
ATOM    153  N   GLN A  40      36.706  23.638  16.814  1.00  0.00           N  
ATOM    154  CA  GLN A  40      37.129  23.949  18.175  1.00  0.00           C  
ATOM    155  C   GLN A  40      36.030  24.233  19.193  1.00  0.00           C  
ATOM    156  O   GLN A  40      36.324  24.456  20.359  1.00  0.00           O  
ATOM    157  N   GLN A  41      34.789  24.236  18.712  1.00  0.00           N  
ATOM    158  CA  GLN A  41      33.673  24.315  19.640  1.00  0.00           C  
ATOM    159  C   GLN A  41      33.413  22.921  20.228  1.00  0.00           C  
ATOM    160  O   GLN A  41      33.148  21.921  19.577  1.00  0.00           O  
ATOM    161  N   ARG A  42      33.370  22.866  21.561  1.00  0.00           N  
ATOM    162  CA  ARG A  42      32.856  21.745  22.319  1.00  0.00           C  
ATOM    163  C   ARG A  42      31.589  22.252  23.005  1.00  0.00           C  
ATOM    164  O   ARG A  42      31.700  23.191  23.791  1.00  0.00           O  
ATOM    165  N   LEU A  43      30.459  21.565  22.849  1.00  0.00           N  
ATOM    166  CA  LEU A  43      29.072  21.932  23.084  1.00  0.00           C  
ATOM    167  C   LEU A  43      28.602  21.183  24.322  1.00  0.00           C  
ATOM    168  O   LEU A  43      28.453  19.964  24.345  1.00  0.00           O  
ATOM    169  N   ILE A  44      28.087  21.879  25.340  1.00  0.00           N  
ATOM    170  CA  ILE A  44      27.562  21.399  26.597  1.00  0.00           C  
ATOM    171  C   ILE A  44      26.138  21.915  26.783  1.00  0.00           C  
ATOM    172  O   ILE A  44      25.916  23.122  26.718  1.00  0.00           O  
ATOM    173  N   PHE A  45      25.134  21.101  27.087  1.00  0.00           N  
ATOM    174  CA  PHE A  45      23.843  21.510  27.603  1.00  0.00           C  
ATOM    175  C   PHE A  45      23.229  20.371  28.417  1.00  0.00           C  
ATOM    176  O   PHE A  45      23.313  19.252  27.922  1.00  0.00           O  
ATOM    177  N   ALA A  46      22.627  20.609  29.583  1.00  0.00           N  
ATOM    178  CA  ALA A  46      21.908  19.603  30.345  1.00  0.00           C  
ATOM    179  C   ALA A  46      22.769  18.480  30.907  1.00  0.00           C  
ATOM    180  O   ALA A  46      22.421  17.301  30.965  1.00  0.00           O  
ATOM    181  N   GLY A  47      23.999  18.890  31.217  1.00  0.00           N  
ATOM    182  CA  GLY A  47      24.977  17.911  31.644  1.00  0.00           C  
ATOM    183  C   GLY A  47      25.660  17.106  30.531  1.00  0.00           C  
ATOM    184  O   GLY A  47      26.647  16.389  30.698  1.00  0.00           O  
ATOM    185  N   LYS A  48      25.100  17.213  29.329  1.00  0.00           N  
ATOM    186  CA  LYS A  48      25.407  16.361  28.199  1.00  0.00           C  
ATOM    187  C   LYS A  48      26.358  17.098  27.259  1.00  0.00           C  
ATOM    188  O   LYS A  48      26.062  18.246  26.938  1.00  0.00           O  
ATOM    189  N   GLN A  49      27.389  16.430  26.746  1.00  0.00           N  
ATOM    190  CA  GLN A  49      28.281  16.930  25.716  1.00  0.00           C  
ATOM    191  C   GLN A  49      27.682  16.441  24.396  1.00  0.00           C  
ATOM    192  O   GLN A  49      27.579  15.233  24.205  1.00  0.00           O  
ATOM    193  N   LEU A  50      27.277  17.408  23.577  1.00  0.00           N  
ATOM    194  CA  LEU A  50      26.385  17.245  22.440  1.00  0.00           C  
ATOM    195  C   LEU A  50      27.270  16.725  21.306  1.00  0.00           C  
ATOM    196  O   LEU A  50      28.405  17.149  21.121  1.00  0.00           O  
ATOM    197  N   GLU A  51      26.665  15.837  20.528  1.00  0.00           N  
ATOM    198  CA  GLU A  51      27.224  15.020  19.472  1.00  0.00           C  
ATOM    199  C   GLU A  51      26.684  15.493  18.128  1.00  0.00           C  
ATOM    200  O   GLU A  51      25.635  16.130  17.964  1.00  0.00           O  
ATOM    201  N   ASP A  52      27.480  15.317  17.074  1.00  0.00           N  
ATOM    202  CA  ASP A  52      27.180  15.794  15.745  1.00  0.00           C  
ATOM    203  C   ASP A  52      26.142  14.910  15.058  1.00  0.00           C  
ATOM    204  O   ASP A  52      26.072  13.718  15.364  1.00  0.00           O  
ATOM    205  N   GLY A  53      25.413  15.464  14.094  1.00  0.00           N  
ATOM    206  CA  GLY A  53      24.629  14.775  13.080  1.00  0.00           C  
ATOM    207  C   GLY A  53      23.121  14.771  13.328  1.00  0.00           C  
ATOM    208  O   GLY A  53      22.354  14.403  12.435  1.00  0.00           O  
ATOM    209  N   ARG A  54      22.788  15.299  14.503  1.00  0.00           N  
ATOM    210  CA  ARG A  54      21.550  15.661  15.156  1.00  0.00           C  
ATOM    211  C   ARG A  54      21.160  17.137  14.976  1.00  0.00           C  
ATOM    212  O   ARG A  54      21.989  18.020  14.758  1.00  0.00           O  
ATOM    213  N   THR A  55      19.875  17.419  15.198  1.00  0.00           N  
ATOM    214  CA  THR A  55      19.292  18.737  15.180  1.00  0.00           C  
ATOM    215  C   THR A  55      19.079  19.117  16.654  1.00  0.00           C  
ATOM    216  O   THR A  55      19.297  18.302  17.545  1.00  0.00           O  
ATOM    217  N   LEU A  56      18.723  20.378  16.885  1.00  0.00           N  
ATOM    218  CA  LEU A  56      18.500  20.952  18.200  1.00  0.00           C  
ATOM    219  C   LEU A  56      17.182  20.391  18.754  1.00  0.00           C  
ATOM    220  O   LEU A  56      16.937  20.281  19.947  1.00  0.00           O  
ATOM    221  N   SER A  57      16.351  19.852  17.866  1.00  0.00           N  
ATOM    222  CA  SER A  57      15.123  19.215  18.289  1.00  0.00           C  
ATOM    223  C   SER A  57      15.364  17.801  18.836  1.00  0.00           C  
ATOM    224  O   SER A  57      14.664  17.368  19.751  1.00  0.00           O  
ATOM    225  N   ASP A  58      16.465  17.169  18.464  1.00  0.00           N  
ATOM    226  CA  ASP A  58      16.810  15.828  18.901  1.00  0.00           C  
ATOM    227  C   ASP A  58      17.490  15.994  20.264  1.00  0.00           C  
ATOM    228  O   ASP A  58      17.930  15.016  20.852  1.00  0.00           O  
ATOM    229  N   TYR A  59      17.591  17.178  20.857  1.00  0.00           N  
ATOM    230  CA  TYR A  59      18.143  17.408  22.178  1.00  0.00           C  
ATOM    231  C   TYR A  59      17.044  18.004  23.069  1.00  0.00           C  
ATOM    232  O   TYR A  59      17.404  18.394  24.176  1.00  0.00           O  
ATOM    233  N   ASN A  60      15.911  18.325  22.447  1.00  0.00           N  
ATOM    234  CA  ASN A  60      14.702  19.021  22.838  1.00  0.00           C  
ATOM    235  C   ASN A  60      14.930  20.454  23.301  1.00  0.00           C  
ATOM    236  O   ASN A  60      14.192  20.981  24.141  1.00  0.00           O  
ATOM    237  N   ILE A  61      15.854  21.171  22.664  1.00  0.00           N  
ATOM    238  CA  ILE A  61      16.061  22.579  22.941  1.00  0.00           C  
ATOM    239  C   ILE A  61      14.894  23.444  22.457  1.00  0.00           C  
ATOM    240  O   ILE A  61      14.264  23.192  21.436  1.00  0.00           O  
ATOM    241  N   GLN A  62      14.480  24.415  23.271  1.00  0.00           N  
ATOM    242  CA  GLN A  62      13.438  25.397  23.070  1.00  0.00           C  
ATOM    243  C   GLN A  62      13.999  26.799  23.334  1.00  0.00           C  
ATOM    244  O   GLN A  62      15.144  26.903  23.753  1.00  0.00           O  
ATOM    245  N   LYS A  63      13.209  27.812  22.984  1.00  0.00           N  
ATOM    246  CA  LYS A  63      13.274  29.260  23.032  1.00  0.00           C  
ATOM    247  C   LYS A  63      13.862  29.660  24.384  1.00  0.00           C  
ATOM    248  O   LYS A  63      13.452  29.174  25.432  1.00  0.00           O  
ATOM    249  N   GLU A  64      14.840  30.558  24.318  1.00  0.00           N  
ATOM    250  CA  GLU A  64      15.411  31.186  25.494  1.00  0.00           C  
ATOM    251  C   GLU A  64      16.254  30.316  26.430  1.00  0.00           C  
ATOM    252  O   GLU A  64      16.626  30.786  27.508  1.00  0.00           O  
ATOM    253  N   SER A  65      16.652  29.120  26.028  1.00  0.00           N  
ATOM    254  CA  SER A  65      17.655  28.265  26.637  1.00  0.00           C  
ATOM    255  C   SER A  65      19.011  28.964  26.521  1.00  0.00           C  
ATOM    256  O   SER A  65      19.221  29.772  25.628  1.00  0.00           O  
ATOM    257  N   THR A  66      19.971  28.797  27.431  1.00  0.00           N  
ATOM    258  CA  THR A  66      21.374  29.143  27.360  1.00  0.00           C  
ATOM    259  C   THR A  66      22.034  27.796  27.066  1.00  0.00           C  
ATOM    260  O   THR A  66      21.920  26.887  27.894  1.00  0.00           O  
ATOM    261  N   LEU A  67      22.755  27.649  25.966  1.00  0.00           N  
ATOM    262  CA  LEU A  67      23.695  26.565  25.785  1.00  0.00           C  
ATOM    263  C   LEU A  67      25.126  27.053  26.024  1.00  0.00           C  
ATOM    264  O   LEU A  67      25.436  28.246  26.038  1.00  0.00           O  
ATOM    265  N   HIS A  68      26.044  26.138  26.329  1.00  0.00           N  
ATOM    266  CA  HIS A  68      27.377  26.478  26.777  1.00  0.00           C  
ATOM    267  C   HIS A  68      28.390  25.952  25.763  1.00  0.00           C  
ATOM    268  O   HIS A  68      28.238  24.838  25.272  1.00  0.00           O  
ATOM    269  N   LEU A  69      29.351  26.805  25.396  1.00  0.00           N  
ATOM    270  CA  LEU A  69      30.428  26.545  24.462  1.00  0.00           C  
ATOM    271  C   LEU A  69      31.735  26.592  25.258  1.00  0.00           C  
ATOM    272  O   LEU A  69      32.215  27.602  25.757  1.00  0.00           O  
ATOM    273  N   VAL A  70      32.408  25.440  25.202  1.00  0.00           N  
ATOM    274  CA  VAL A  70      33.753  25.230  25.698  1.00  0.00           C  
ATOM    275  C   VAL A  70      34.724  25.290  24.512  1.00  0.00           C  
ATOM    276  O   VAL A  70      34.440  24.621  23.520  1.00  0.00           O  
TER
ENDMDL
MODEL      11
ATOM      1  N   GLN A   2      15.469  32.323  18.510  1.00  0.00           N  
ATOM      2  CA  GLN A   2      16.739  32.678  19.099  1.00  0.00           C  
ATOM      3  C   GLN A   2      17.203  31.506  19.974  1.00  0.00           C  
ATOM      4  O   GLN A   2      16.308  31.118  20.720  1.00  0.00           O  
ATOM      5  N   ILE A   3      18.493  31.200  20.084  1.00  0.00           N  
ATOM      6  CA  ILE A   3      19.025  30.591  21.288  1.00  0.00           C  
ATOM      7  C   ILE A   3      20.106  31.468  21.911  1.00  0.00           C  
ATOM      8  O   ILE A   3      20.680  32.233  21.140  1.00  0.00           O  
ATOM      9  N   PHE A   4      20.350  31.248  23.203  1.00  0.00           N  
ATOM     10  CA  PHE A   4      21.376  31.785  24.087  1.00  0.00           C  
ATOM     11  C   PHE A   4      22.481  30.733  24.193  1.00  0.00           C  
ATOM     12  O   PHE A   4      22.192  29.583  24.499  1.00  0.00           O  
ATOM     13  N   VAL A   5      23.709  31.227  24.018  1.00  0.00           N  
ATOM     14  CA  VAL A   5      24.901  30.425  24.249  1.00  0.00           C  
ATOM     15  C   VAL A   5      25.773  31.261  25.181  1.00  0.00           C  
ATOM     16  O   VAL A   5      25.795  32.482  25.080  1.00  0.00           O  
ATOM     17  N   LYS A   6      26.484  30.568  26.068  1.00  0.00           N  
ATOM     18  CA  LYS A   6      27.452  31.068  27.012  1.00  0.00           C  
ATOM     19  C   LYS A   6      28.831  30.513  26.639  1.00  0.00           C  
ATOM     20  O   LYS A   6      28.946  29.333  26.334  1.00  0.00           O  
ATOM     21  N   THR A   7      29.817  31.392  26.777  1.00  0.00           N  
ATOM     22  CA  THR A   7      31.189  30.993  26.524  1.00  0.00           C  
ATOM     23  C   THR A   7      31.794  30.744  27.908  1.00  0.00           C  
ATOM     24  O   THR A   7      31.290  31.060  28.985  1.00  0.00           O  
ATOM     25  N   LEU A   8      32.997  30.177  27.835  1.00  0.00           N  
ATOM     26  CA  LEU A   8      33.884  29.902  28.947  1.00  0.00           C  
ATOM     27  C   LEU A   8      34.182  31.190  29.704  1.00  0.00           C  
ATOM     28  O   LEU A   8      34.365  31.141  30.916  1.00  0.00           O  
ATOM     29  N   THR A   9      34.246  32.388  29.117  1.00  0.00           N  
ATOM     30  CA  THR A   9      34.559  33.655  29.746  1.00  0.00           C  
ATOM     31  C   THR A   9      33.296  34.287  30.323  1.00  0.00           C  
ATOM     32  O   THR A   9      33.478  35.131  31.200  1.00  0.00           O  
ATOM     33  N   GLY A  10      32.110  33.759  30.040  1.00  0.00           N  
ATOM     34  CA  GLY A  10      30.746  34.006  30.469  1.00  0.00           C  
ATOM     35  C   GLY A  10      29.895  34.803  29.475  1.00  0.00           C  
ATOM     36  O   GLY A  10      28.821  35.229  29.900  1.00  0.00           O  
ATOM     37  N   LYS A  11      30.380  34.991  28.250  1.00  0.00           N  
ATOM     38  CA  LYS A  11      29.898  35.991  27.326  1.00  0.00           C  
ATOM     39  C   LYS A  11      28.661  35.352  26.673  1.00  0.00           C  
ATOM     40  O   LYS A  11      28.675  34.202  26.251  1.00  0.00           O  
ATOM     41  N   THR A  12      27.556  36.092  26.676  1.00  0.00           N  
ATOM     42  CA  THR A  12      26.277  35.643  26.166  1.00  0.00           C  
ATOM     43  C   THR A  12      26.068  36.125  24.723  1.00  0.00           C  
ATOM     44  O   THR A  12      26.307  37.279  24.386  1.00  0.00           O  
ATOM     45  N   ILE A  13      25.775  35.221  23.800  1.00  0.00           N  
ATOM     46  CA  ILE A  13      25.394  35.554  22.437  1.00  0.00           C  
ATOM     47  C   ILE A  13      23.991  34.977  22.222  1.00  0.00           C  
ATOM     48  O   ILE A  13      23.523  34.047  22.881  1.00  0.00           O  
ATOM     49  N   THR A  14      23.284  35.661  21.332  1.00  0.00           N  
ATOM     50  CA  THR A  14      21.926  35.409  20.884  1.00  0.00           C  
ATOM     51  C   THR A  14      22.008  35.117  19.388  1.00  0.00           C  
ATOM     52  O   THR A  14      21.954  35.998  18.530  1.00  0.00           O  
ATOM     53  N   LEU A  15      22.150  33.804  19.233  1.00  0.00           N  
ATOM     54  CA  LEU A  15      22.216  33.252  17.900  1.00  0.00           C  
ATOM     55  C   LEU A  15      20.823  33.040  17.295  1.00  0.00           C  
ATOM     56  O   LEU A  15      19.923  32.772  18.080  1.00  0.00           O  
ATOM     57  N   GLU A  16      20.633  33.118  15.977  1.00  0.00           N  
ATOM     58  CA  GLU A  16      19.379  32.944  15.278  1.00  0.00           C  
ATOM     59  C   GLU A  16      19.436  31.615  14.522  1.00  0.00           C  
ATOM     60  O   GLU A  16      20.222  31.441  13.599  1.00  0.00           O  
ATOM     61  N   VAL A  17      18.707  30.600  14.964  1.00  0.00           N  
ATOM     62  CA  VAL A  17      18.412  29.265  14.458  1.00  0.00           C  
ATOM     63  C   VAL A  17      16.936  28.940  14.207  1.00  0.00           C  
ATOM     64  O   VAL A  17      16.113  29.784  14.543  1.00  0.00           O  
ATOM     65  N   GLU A  18      16.576  27.718  13.813  1.00  0.00           N  
ATOM     66  CA  GLU A  18      15.199  27.273  13.697  1.00  0.00           C  
ATOM     67  C   GLU A  18      15.304  25.757  13.934  1.00  0.00           C  
ATOM     68  O   GLU A  18      16.348  25.201  13.597  1.00  0.00           O  
ATOM     69  N   PRO A  19      14.264  25.018  14.299  1.00  0.00           N  
ATOM     70  CA  PRO A  19      14.203  23.585  14.453  1.00  0.00           C  
ATOM     71  C   PRO A  19      14.864  22.641  13.450  1.00  0.00           C  
ATOM     72  O   PRO A  19      15.120  21.488  13.772  1.00  0.00           O  
ATOM     73  N   SER A  20      15.033  23.150  12.230  1.00  0.00           N  
ATOM     74  CA  SER A  20      15.662  22.573  11.066  1.00  0.00           C  
ATOM     75  C   SER A  20      17.198  22.610  11.067  1.00  0.00           C  
ATOM     76  O   SER A  20      17.843  22.064  10.175  1.00  0.00           O  
ATOM     77  N   ASP A  21      17.830  23.114  12.114  1.00  0.00           N  
ATOM     78  CA  ASP A  21      19.272  23.192  12.230  1.00  0.00           C  
ATOM     79  C   ASP A  21      19.956  22.089  13.044  1.00  0.00           C  
ATOM     80  O   ASP A  21      19.538  21.892  14.189  1.00  0.00           O  
ATOM     81  N   THR A  22      20.983  21.486  12.471  1.00  0.00           N  
ATOM     82  CA  THR A  22      21.907  20.527  13.039  1.00  0.00           C  
ATOM     83  C   THR A  22      22.950  21.190  13.942  1.00  0.00           C  
ATOM     84  O   THR A  22      22.927  22.422  13.911  1.00  0.00           O  
ATOM     85  N   ILE A  23      23.885  20.502  14.591  1.00  0.00           N  
ATOM     86  CA  ILE A  23      24.866  21.153  15.435  1.00  0.00           C  
ATOM     87  C   ILE A  23      25.928  21.817  14.553  1.00  0.00           C  
ATOM     88  O   ILE A  23      26.422  22.833  15.044  1.00  0.00           O  
ATOM     89  N   GLU A  24      26.196  21.410  13.321  1.00  0.00           N  
ATOM     90  CA  GLU A  24      27.131  21.880  12.306  1.00  0.00           C  
ATOM     91  C   GLU A  24      26.535  23.194  11.794  1.00  0.00           C  
ATOM     92  O   GLU A  24      27.212  24.199  11.521  1.00  0.00           O  
ATOM     93  N   ASN A  25      25.221  23.237  11.597  1.00  0.00           N  
ATOM     94  CA  ASN A  25      24.566  24.451  11.153  1.00  0.00           C  
ATOM     95  C   ASN A  25      24.608  25.622  12.135  1.00  0.00           C  
ATOM     96  O   ASN A  25      24.698  26.770  11.721  1.00  0.00           O  
ATOM     97  N   VAL A  26      24.636  25.315  13.425  1.00  0.00           N  
ATOM     98  CA  VAL A  26      24.721  26.260  14.519  1.00  0.00           C  
ATOM     99  C   VAL A  26      26.208  26.544  14.795  1.00  0.00           C  
ATOM    100  O   VAL A  26      26.346  27.748  14.989  1.00  0.00           O  
ATOM    101  N   LYS A  27      27.208  25.680  14.710  1.00  0.00           N  
ATOM    102  CA  LYS A  27      28.611  26.043  14.771  1.00  0.00           C  
ATOM    103  C   LYS A  27      29.094  26.914  13.601  1.00  0.00           C  
ATOM    104  O   LYS A  27      30.054  27.659  13.813  1.00  0.00           O  
ATOM    105  N   ALA A  28      28.491  26.777  12.424  1.00  0.00           N  
ATOM    106  CA  ALA A  28      28.637  27.676  11.301  1.00  0.00           C  
ATOM    107  C   ALA A  28      28.014  29.056  11.521  1.00  0.00           C  
ATOM    108  O   ALA A  28      28.540  30.131  11.236  1.00  0.00           O  
ATOM    109  N   LYS A  29      26.858  29.148  12.165  1.00  0.00           N  
ATOM    110  CA  LYS A  29      26.214  30.424  12.417  1.00  0.00           C  
ATOM    111  C   LYS A  29      26.990  31.166  13.507  1.00  0.00           C  
ATOM    112  O   LYS A  29      27.079  32.385  13.394  1.00  0.00           O  
ATOM    113  N   ILE A  30      27.528  30.518  14.533  1.00  0.00           N  
ATOM    114  CA  ILE A  30      28.583  30.971  15.424  1.00  0.00           C  
ATOM    115  C   ILE A  30      29.830  31.500  14.712  1.00  0.00           C  
ATOM    116  O   ILE A  30      30.165  32.672  14.869  1.00  0.00           O  
ATOM    117  N   GLN A  31      30.509  30.601  14.009  1.00  0.00           N  
ATOM    118  CA  GLN A  31      31.585  30.852  13.074  1.00  0.00           C  
ATOM    119  C   GLN A  31      31.378  32.142  12.279  1.00  0.00           C  
ATOM    120  O   GLN A  31      32.312  32.941  12.222  1.00  0.00           O  
ATOM    121  N   ASP A  32      30.201  32.466  11.764  1.00  0.00           N  
ATOM    122  CA  ASP A  32      29.816  33.621  10.979  1.00  0.00           C  
ATOM    123  C   ASP A  32      29.978  35.012  11.607  1.00  0.00           C  
ATOM    124  O   ASP A  32      30.553  35.938  11.032  1.00  0.00           O  
ATOM    125  N   LYS A  33      29.595  35.032  12.874  1.00  0.00           N  
ATOM    126  CA  LYS A  33      29.605  36.246  13.668  1.00  0.00           C  
ATOM    127  C   LYS A  33      30.777  36.363  14.647  1.00  0.00           C  
ATOM    128  O   LYS A  33      31.403  37.402  14.822  1.00  0.00           O  
ATOM    129  N   GLU A  34      31.260  35.209  15.107  1.00  0.00           N  
ATOM    130  CA  GLU A  34      32.208  35.129  16.201  1.00  0.00           C  
ATOM    131  C   GLU A  34      33.576  34.504  15.930  1.00  0.00           C  
ATOM    132  O   GLU A  34      34.539  34.605  16.688  1.00  0.00           O  
ATOM    133  N   GLY A  35      33.690  33.839  14.777  1.00  0.00           N  
ATOM    134  CA  GLY A  35      34.978  33.528  14.203  1.00  0.00           C  
ATOM    135  C   GLY A  35      35.603  32.156  14.496  1.00  0.00           C  
ATOM    136  O   GLY A  35      36.605  31.905  13.831  1.00  0.00           O  
ATOM    137  N   ILE A  36      35.019  31.464  15.470  1.00  0.00           N  
ATOM    138  CA  ILE A  36      35.610  30.337  16.167  1.00  0.00           C  
ATOM    139  C   ILE A  36      35.573  29.190  15.163  1.00  0.00           C  
ATOM    140  O   ILE A  36      34.465  28.983  14.655  1.00  0.00           O  
ATOM    141  N   PRO A  37      36.690  28.553  14.813  1.00  0.00           N  
ATOM    142  CA  PRO A  37      36.711  27.337  14.029  1.00  0.00           C  
ATOM    143  C   PRO A  37      35.808  26.227  14.584  1.00  0.00           C  
ATOM    144  O   PRO A  37      35.722  26.034  15.793  1.00  0.00           O  
ATOM    145  N   PRO A  38      35.240  25.462  13.667  1.00  0.00           N  
ATOM    146  CA  PRO A  38      34.304  24.426  14.038  1.00  0.00           C  
ATOM    147  C   PRO A  38      34.869  23.208  14.762  1.00  0.00           C  
ATOM    148  O   PRO A  38      34.244  22.615  15.627  1.00  0.00           O  
ATOM    149  N   ASP A  39      36.128  22.876  14.461  1.00  0.00           N  
ATOM    150  CA  ASP A  39      36.601  21.529  14.711  1.00  0.00           C  
ATOM    151  C   ASP A  39      36.960  21.390  16.198  1.00  0.00           C  
ATOM    152  O   ASP A  39      36.767  20.375  16.862  1.00  0.00           O  
ATOM    153  N   GLN A  40      37.482  22.496  16.726  1.00  0.00           N  
ATOM    154  CA  GLN A  40      37.766  22.600  18.141  1.00  0.00           C  
ATOM    155  C   GLN A  40      36.576  22.925  19.055  1.00  0.00           C  
ATOM    156  O   GLN A  40      36.673  22.728  20.260  1.00  0.00           O  
ATOM    157  N   GLN A  41      35.501  23.467  18.478  1.00  0.00           N  
ATOM    158  CA  GLN A  41      34.359  23.971  19.206  1.00  0.00           C  
ATOM    159  C   GLN A  41      33.416  22.847  19.615  1.00  0.00           C  
ATOM    160  O   GLN A  41      33.204  21.942  18.800  1.00  0.00           O  
ATOM    161  N   ARG A  42      32.743  22.861  20.753  1.00  0.00           N  
ATOM    162  CA  ARG A  42      31.707  21.934  21.180  1.00  0.00           C  
ATOM    163  C   ARG A  42      30.591  22.654  21.943  1.00  0.00           C  
ATOM    164  O   ARG A  42      30.955  23.672  22.523  1.00  0.00           O  
ATOM    165  N   LEU A  43      29.372  22.135  21.881  1.00  0.00           N  
ATOM    166  CA  LEU A  43      28.294  22.755  22.613  1.00  0.00           C  
ATOM    167  C   LEU A  43      27.813  21.766  23.680  1.00  0.00           C  
ATOM    168  O   LEU A  43      27.513  20.622  23.350  1.00  0.00           O  
ATOM    169  N   ILE A  44      27.880  22.180  24.944  1.00  0.00           N  
ATOM    170  CA  ILE A  44      27.483  21.378  26.088  1.00  0.00           C  
ATOM    171  C   ILE A  44      26.132  22.023  26.410  1.00  0.00           C  
ATOM    172  O   ILE A  44      25.936  23.232  26.458  1.00  0.00           O  
ATOM    173  N   PHE A  45      25.149  21.205  26.796  1.00  0.00           N  
ATOM    174  CA  PHE A  45      23.858  21.609  27.310  1.00  0.00           C  
ATOM    175  C   PHE A  45      23.665  20.595  28.440  1.00  0.00           C  
ATOM    176  O   PHE A  45      23.771  19.411  28.134  1.00  0.00           O  
ATOM    177  N   ALA A  46      23.371  21.017  29.667  1.00  0.00           N  
ATOM    178  CA  ALA A  46      23.042  20.247  30.856  1.00  0.00           C  
ATOM    179  C   ALA A  46      24.204  19.297  31.134  1.00  0.00           C  
ATOM    180  O   ALA A  46      24.046  18.125  31.484  1.00  0.00           O  
ATOM    181  N   GLY A  47      25.453  19.744  31.091  1.00  0.00           N  
ATOM    182  CA  GLY A  47      26.647  18.949  31.281  1.00  0.00           C  
ATOM    183  C   GLY A  47      27.078  17.922  30.224  1.00  0.00           C  
ATOM    184  O   GLY A  47      28.187  17.399  30.344  1.00  0.00           O  
ATOM    185  N   LYS A  48      26.224  17.592  29.263  1.00  0.00           N  
ATOM    186  CA  LYS A  48      26.415  16.651  28.179  1.00  0.00           C  
ATOM    187  C   LYS A  48      26.826  17.424  26.925  1.00  0.00           C  
ATOM    188  O   LYS A  48      26.186  18.451  26.696  1.00  0.00           O  
ATOM    189  N   GLN A  49      27.794  16.947  26.157  1.00  0.00           N  
ATOM    190  CA  GLN A  49      28.053  17.428  24.816  1.00  0.00           C  
ATOM    191  C   GLN A  49      26.806  17.170  23.964  1.00  0.00           C  
ATOM    192  O   GLN A  49      26.257  16.080  23.983  1.00  0.00           O  
ATOM    193  N   LEU A  50      26.418  18.096  23.084  1.00  0.00           N  
ATOM    194  CA  LEU A  50      25.495  18.022  21.969  1.00  0.00           C  
ATOM    195  C   LEU A  50      26.315  17.408  20.831  1.00  0.00           C  
ATOM    196  O   LEU A  50      27.273  18.007  20.334  1.00  0.00           O  
ATOM    197  N   GLU A  51      25.948  16.169  20.527  1.00  0.00           N  
ATOM    198  CA  GLU A  51      26.741  15.407  19.577  1.00  0.00           C  
ATOM    199  C   GLU A  51      26.124  15.572  18.190  1.00  0.00           C  
ATOM    200  O   GLU A  51      24.929  15.338  17.996  1.00  0.00           O  
ATOM    201  N   ASP A  52      26.968  15.780  17.186  1.00  0.00           N  
ATOM    202  CA  ASP A  52      26.782  15.921  15.752  1.00  0.00           C  
ATOM    203  C   ASP A  52      25.898  14.868  15.077  1.00  0.00           C  
ATOM    204  O   ASP A  52      25.871  13.715  15.509  1.00  0.00           O  
ATOM    205  N   GLY A  53      25.087  15.297  14.115  1.00  0.00           N  
ATOM    206  CA  GLY A  53      24.130  14.401  13.493  1.00  0.00           C  
ATOM    207  C   GLY A  53      22.689  14.765  13.874  1.00  0.00           C  
ATOM    208  O   GLY A  53      21.766  14.627  13.078  1.00  0.00           O  
ATOM    209  N   ARG A  54      22.399  15.315  15.046  1.00  0.00           N  
ATOM    210  CA  ARG A  54      21.121  15.614  15.657  1.00  0.00           C  
ATOM    211  C   ARG A  54      20.857  17.104  15.465  1.00  0.00           C  
ATOM    212  O   ARG A  54      21.742  17.855  15.031  1.00  0.00           O  
ATOM    213  N   THR A  55      19.583  17.442  15.627  1.00  0.00           N  
ATOM    214  CA  THR A  55      19.057  18.771  15.424  1.00  0.00           C  
ATOM    215  C   THR A  55      18.849  19.411  16.795  1.00  0.00           C  
ATOM    216  O   THR A  55      19.221  18.864  17.831  1.00  0.00           O  
ATOM    217  N   LEU A  56      18.297  20.615  16.865  1.00  0.00           N  
ATOM    218  CA  LEU A  56      17.854  21.211  18.112  1.00  0.00           C  
ATOM    219  C   LEU A  56      16.696  20.454  18.762  1.00  0.00           C  
ATOM    220  O   LEU A  56      16.588  20.559  19.986  1.00  0.00           O  
ATOM    221  N   SER A  57      15.787  19.872  17.989  1.00  0.00           N  
ATOM    222  CA  SER A  57      14.688  19.086  18.518  1.00  0.00           C  
ATOM    223  C   SER A  57      15.127  17.844  19.288  1.00  0.00           C  
ATOM    224  O   SER A  57      14.507  17.517  20.295  1.00  0.00           O  
ATOM    225  N   ASP A  58      16.186  17.172  18.827  1.00  0.00           N  
ATOM    226  CA  ASP A  58      16.743  15.953  19.378  1.00  0.00           C  
ATOM    227  C   ASP A  58      17.295  16.050  20.798  1.00  0.00           C  
ATOM    228  O   ASP A  58      17.425  15.047  21.497  1.00  0.00           O  
ATOM    229  N   TYR A  59      17.576  17.291  21.179  1.00  0.00           N  
ATOM    230  CA  TYR A  59      18.152  17.713  22.452  1.00  0.00           C  
ATOM    231  C   TYR A  59      17.176  18.561  23.266  1.00  0.00           C  
ATOM    232  O   TYR A  59      17.417  18.818  24.442  1.00  0.00           O  
ATOM    233  N   ASN A  60      16.052  18.844  22.626  1.00  0.00           N  
ATOM    234  CA  ASN A  60      14.933  19.601  23.155  1.00  0.00           C  
ATOM    235  C   ASN A  60      15.292  20.992  23.673  1.00  0.00           C  
ATOM    236  O   ASN A  60      15.059  21.331  24.822  1.00  0.00           O  
ATOM    237  N   ILE A  61      15.928  21.794  22.819  1.00  0.00           N  
ATOM    238  CA  ILE A  61      16.395  23.120  23.179  1.00  0.00           C  
ATOM    239  C   ILE A  61      15.284  24.131  22.915  1.00  0.00           C  
ATOM    240  O   ILE A  61      14.722  24.205  21.826  1.00  0.00           O  
ATOM    241  N   GLN A  62      15.064  24.978  23.917  1.00  0.00           N  
ATOM    242  CA  GLN A  62      14.241  26.167  23.897  1.00  0.00           C  
ATOM    243  C   GLN A  62      15.131  27.396  23.683  1.00  0.00           C  
ATOM    244  O   GLN A  62      16.253  27.424  24.160  1.00  0.00           O  
ATOM    245  N   LYS A  63      14.486  28.378  23.056  1.00  0.00           N  
ATOM    246  CA  LYS A  63      14.851  29.777  23.199  1.00  0.00           C  
ATOM    247  C   LYS A  63      15.068  30.107  24.675  1.00  0.00           C  
ATOM    248  O   LYS A  63      14.300  29.678  25.533  1.00  0.00           O  
ATOM    249  N   GLU A  64      16.161  30.831  24.899  1.00  0.00           N  
ATOM    250  CA  GLU A  64      16.455  31.519  26.144  1.00  0.00           C  
ATOM    251  C   GLU A  64      17.124  30.660  27.222  1.00  0.00           C  
ATOM    252  O   GLU A  64      17.264  31.170  28.330  1.00  0.00           O  
ATOM    253  N   SER A  65      17.215  29.374  26.895  1.00  0.00           N  
ATOM    254  CA  SER A  65      17.793  28.369  27.761  1.00  0.00           C  
ATOM    255  C   SER A  65      19.303  28.314  27.486  1.00  0.00           C  
ATOM    256  O   SER A  65      19.703  28.418  26.324  1.00  0.00           O  
ATOM    257  N   THR A  66      20.147  28.166  28.499  1.00  0.00           N  
ATOM    258  CA  THR A  66      21.562  28.431  28.336  1.00  0.00           C  
ATOM    259  C   THR A  66      22.222  27.092  27.971  1.00  0.00           C  
ATOM    260  O   THR A  66      22.039  26.080  28.636  1.00  0.00           O  
ATOM    261  N   LEU A  67      22.990  27.211  26.887  1.00  0.00           N  
ATOM    262  CA  LEU A  67      23.925  26.330  26.222  1.00  0.00           C  
ATOM    263  C   LEU A  67      25.375  26.772  26.445  1.00  0.00           C  
ATOM    264  O   LEU A  67      25.658  27.921  26.106  1.00  0.00           O  
ATOM    265  N   HIS A  68      26.337  25.968  26.872  1.00  0.00           N  
ATOM    266  CA  HIS A  68      27.726  26.368  27.024  1.00  0.00           C  
ATOM    267  C   HIS A  68      28.462  25.991  25.735  1.00  0.00           C  
ATOM    268  O   HIS A  68      28.211  24.910  25.193  1.00  0.00           O  
ATOM    269  N   LEU A  69      29.377  26.845  25.279  1.00  0.00           N  
ATOM    270  CA  LEU A  69      30.212  26.750  24.106  1.00  0.00           C  
ATOM    271  C   LEU A  69      31.632  26.680  24.692  1.00  0.00           C  
ATOM    272  O   LEU A  69      32.394  27.626  24.892  1.00  0.00           O  
ATOM    273  N   VAL A  70      32.043  25.435  24.887  1.00  0.00           N  
ATOM    274  CA  VAL A  70      33.397  25.069  25.232  1.00  0.00           C  
ATOM    275  C   VAL A  70      34.198  24.740  23.973  1.00  0.00           C  
ATOM    276  O   VAL A  70      33.707  24.285  22.946  1.00  0.00           O  
TER
ENDMDL
MODEL      12
ATOM      1  N   GLN A   2      14.912  31.687  20.558  1.00  0.00           N  
ATOM      2  CA  GLN A   2      16.183  32.186  21.045  1.00  0.00           C  
ATOM      3  C   GLN A   2      16.679  31.209  22.114  1.00  0.00           C  
ATOM      4  O   GLN A   2      16.105  30.946  23.166  1.00  0.00           O  
ATOM      5  N   ILE A   3      17.884  30.713  21.875  1.00  0.00           N  
ATOM      6  CA  ILE A   3      18.854  30.182  22.807  1.00  0.00           C  
ATOM      7  C   ILE A   3      20.035  31.155  22.877  1.00  0.00           C  
ATOM      8  O   ILE A   3      20.332  31.846  21.908  1.00  0.00           O  
ATOM      9  N   PHE A   4      20.729  31.094  24.006  1.00  0.00           N  
ATOM     10  CA  PHE A   4      21.984  31.782  24.209  1.00  0.00           C  
ATOM     11  C   PHE A   4      23.070  30.703  24.279  1.00  0.00           C  
ATOM     12  O   PHE A   4      22.876  29.525  24.557  1.00  0.00           O  
ATOM     13  N   VAL A   5      24.267  31.242  24.044  1.00  0.00           N  
ATOM     14  CA  VAL A   5      25.582  30.680  24.257  1.00  0.00           C  
ATOM     15  C   VAL A   5      26.369  31.619  25.178  1.00  0.00           C  
ATOM     16  O   VAL A   5      26.286  32.824  24.962  1.00  0.00           O  
ATOM     17  N   LYS A   6      27.024  31.008  26.163  1.00  0.00           N  
ATOM     18  CA  LYS A   6      27.795  31.786  27.114  1.00  0.00           C  
ATOM     19  C   LYS A   6      29.281  31.442  27.004  1.00  0.00           C  
ATOM     20  O   LYS A   6      29.601  30.340  26.567  1.00  0.00           O  
ATOM     21  N   THR A   7      30.185  32.323  27.432  1.00  0.00           N  
ATOM     22  CA  THR A   7      31.626  32.205  27.450  1.00  0.00           C  
ATOM     23  C   THR A   7      32.168  32.975  28.658  1.00  0.00           C  
ATOM     24  O   THR A   7      31.478  33.760  29.301  1.00  0.00           O  
ATOM     25  N   LEU A   8      33.391  32.725  29.119  1.00  0.00           N  
ATOM     26  CA  LEU A   8      34.200  33.190  30.229  1.00  0.00           C  
ATOM     27  C   LEU A   8      33.982  34.597  30.795  1.00  0.00           C  
ATOM     28  O   LEU A   8      33.762  34.781  31.990  1.00  0.00           O  
ATOM     29  N   THR A   9      33.870  35.603  29.940  1.00  0.00           N  
ATOM     30  CA  THR A   9      33.834  37.025  30.214  1.00  0.00           C  
ATOM     31  C   THR A   9      32.474  37.538  30.699  1.00  0.00           C  
ATOM     32  O   THR A   9      32.375  38.637  31.241  1.00  0.00           O  
ATOM     33  N   GLY A  10      31.464  36.713  30.465  1.00  0.00           N  
ATOM     34  CA  GLY A  10      30.069  37.074  30.676  1.00  0.00           C  
ATOM     35  C   GLY A  10      29.324  37.430  29.386  1.00  0.00           C  
ATOM     36  O   GLY A  10      28.092  37.488  29.437  1.00  0.00           O  
ATOM     37  N   LYS A  11      30.057  37.614  28.296  1.00  0.00           N  
ATOM     38  CA  LYS A  11      29.540  37.884  26.976  1.00  0.00           C  
ATOM     39  C   LYS A  11      28.563  36.740  26.658  1.00  0.00           C  
ATOM     40  O   LYS A  11      28.908  35.571  26.803  1.00  0.00           O  
ATOM     41  N   THR A  12      27.537  36.987  25.855  1.00  0.00           N  
ATOM     42  CA  THR A  12      26.637  36.037  25.233  1.00  0.00           C  
ATOM     43  C   THR A  12      26.425  36.225  23.729  1.00  0.00           C  
ATOM     44  O   THR A  12      26.510  37.328  23.183  1.00  0.00           O  
ATOM     45  N   ILE A  13      26.164  35.111  23.047  1.00  0.00           N  
ATOM     46  CA  ILE A  13      25.952  34.913  21.634  1.00  0.00           C  
ATOM     47  C   ILE A  13      24.518  34.376  21.631  1.00  0.00           C  
ATOM     48  O   ILE A  13      24.146  33.336  22.169  1.00  0.00           O  
ATOM     49  N   THR A  14      23.636  35.134  20.992  1.00  0.00           N  
ATOM     50  CA  THR A  14      22.260  34.866  20.637  1.00  0.00           C  
ATOM     51  C   THR A  14      22.204  34.602  19.126  1.00  0.00           C  
ATOM     52  O   THR A  14      22.694  35.398  18.326  1.00  0.00           O  
ATOM     53  N   LEU A  15      21.706  33.436  18.748  1.00  0.00           N  
ATOM     54  CA  LEU A  15      21.202  33.031  17.453  1.00  0.00           C  
ATOM     55  C   LEU A  15      19.697  32.783  17.579  1.00  0.00           C  
ATOM     56  O   LEU A  15      19.189  32.209  18.531  1.00  0.00           O  
ATOM     57  N   GLU A  16      18.930  33.291  16.617  1.00  0.00           N  
ATOM     58  CA  GLU A  16      17.529  33.007  16.390  1.00  0.00           C  
ATOM     59  C   GLU A  16      17.622  31.680  15.633  1.00  0.00           C  
ATOM     60  O   GLU A  16      18.099  31.625  14.493  1.00  0.00           O  
ATOM     61  N   VAL A  17      17.204  30.615  16.306  1.00  0.00           N  
ATOM     62  CA  VAL A  17      17.357  29.257  15.817  1.00  0.00           C  
ATOM     63  C   VAL A  17      16.003  28.601  15.534  1.00  0.00           C  
ATOM     64  O   VAL A  17      14.953  28.844  16.119  1.00  0.00           O  
ATOM     65  N   GLU A  18      15.993  27.772  14.502  1.00  0.00           N  
ATOM     66  CA  GLU A  18      14.919  27.026  13.872  1.00  0.00           C  
ATOM     67  C   GLU A  18      15.066  25.569  14.343  1.00  0.00           C  
ATOM     68  O   GLU A  18      16.173  25.076  14.175  1.00  0.00           O  
ATOM     69  N   PRO A  19      14.072  25.056  15.065  1.00  0.00           N  
ATOM     70  CA  PRO A  19      14.173  23.701  15.567  1.00  0.00           C  
ATOM     71  C   PRO A  19      14.909  22.589  14.811  1.00  0.00           C  
ATOM     72  O   PRO A  19      15.544  21.702  15.386  1.00  0.00           O  
ATOM     73  N   SER A  20      14.717  22.523  13.497  1.00  0.00           N  
ATOM     74  CA  SER A  20      15.263  21.630  12.501  1.00  0.00           C  
ATOM     75  C   SER A  20      16.671  21.862  11.941  1.00  0.00           C  
ATOM     76  O   SER A  20      17.188  20.993  11.245  1.00  0.00           O  
ATOM     77  N   ASP A  21      17.270  22.991  12.298  1.00  0.00           N  
ATOM     78  CA  ASP A  21      18.644  23.323  11.950  1.00  0.00           C  
ATOM     79  C   ASP A  21      19.670  22.450  12.659  1.00  0.00           C  
ATOM     80  O   ASP A  21      19.570  22.281  13.878  1.00  0.00           O  
ATOM     81  N   THR A  22      20.575  21.826  11.908  1.00  0.00           N  
ATOM     82  CA  THR A  22      21.577  20.916  12.430  1.00  0.00           C  
ATOM     83  C   THR A  22      22.685  21.587  13.261  1.00  0.00           C  
ATOM     84  O   THR A  22      23.141  22.670  12.905  1.00  0.00           O  
ATOM     85  N   ILE A  23      23.221  20.922  14.281  1.00  0.00           N  
ATOM     86  CA  ILE A  23      24.256  21.403  15.174  1.00  0.00           C  
ATOM     87  C   ILE A  23      25.478  21.942  14.418  1.00  0.00           C  
ATOM     88  O   ILE A  23      26.110  22.881  14.880  1.00  0.00           O  
ATOM     89  N   GLU A  24      25.788  21.399  13.244  1.00  0.00           N  
ATOM     90  CA  GLU A  24      27.024  21.673  12.526  1.00  0.00           C  
ATOM     91  C   GLU A  24      26.842  22.907  11.636  1.00  0.00           C  
ATOM     92  O   GLU A  24      27.680  23.795  11.543  1.00  0.00           O  
ATOM     93  N   ASN A  25      25.642  23.099  11.104  1.00  0.00           N  
ATOM     94  CA  ASN A  25      25.230  24.351  10.512  1.00  0.00           C  
ATOM     95  C   ASN A  25      25.140  25.566  11.444  1.00  0.00           C  
ATOM     96  O   ASN A  25      25.572  26.678  11.148  1.00  0.00           O  
ATOM     97  N   VAL A  26      24.707  25.272  12.661  1.00  0.00           N  
ATOM     98  CA  VAL A  26      24.771  26.161  13.803  1.00  0.00           C  
ATOM     99  C   VAL A  26      26.210  26.483  14.178  1.00  0.00           C  
ATOM    100  O   VAL A  26      26.456  27.653  14.468  1.00  0.00           O  
ATOM    101  N   LYS A  27      27.117  25.514  14.314  1.00  0.00           N  
ATOM    102  CA  LYS A  27      28.533  25.698  14.518  1.00  0.00           C  
ATOM    103  C   LYS A  27      29.320  26.498  13.477  1.00  0.00           C  
ATOM    104  O   LYS A  27      30.262  27.221  13.809  1.00  0.00           O  
ATOM    105  N   ALA A  28      28.851  26.458  12.236  1.00  0.00           N  
ATOM    106  CA  ALA A  28      29.338  27.022  10.989  1.00  0.00           C  
ATOM    107  C   ALA A  28      28.781  28.448  10.854  1.00  0.00           C  
ATOM    108  O   ALA A  28      29.347  29.217  10.081  1.00  0.00           O  
ATOM    109  N   LYS A  29      27.738  28.832  11.578  1.00  0.00           N  
ATOM    110  CA  LYS A  29      27.341  30.225  11.620  1.00  0.00           C  
ATOM    111  C   LYS A  29      28.047  30.955  12.773  1.00  0.00           C  
ATOM    112  O   LYS A  29      28.226  32.164  12.666  1.00  0.00           O  
ATOM    113  N   ILE A  30      28.437  30.287  13.847  1.00  0.00           N  
ATOM    114  CA  ILE A  30      29.244  30.731  14.966  1.00  0.00           C  
ATOM    115  C   ILE A  30      30.680  30.906  14.476  1.00  0.00           C  
ATOM    116  O   ILE A  30      31.262  31.878  14.964  1.00  0.00           O  
ATOM    117  N   GLN A  31      31.121  30.120  13.504  1.00  0.00           N  
ATOM    118  CA  GLN A  31      32.403  30.287  12.846  1.00  0.00           C  
ATOM    119  C   GLN A  31      32.599  31.667  12.226  1.00  0.00           C  
ATOM    120  O   GLN A  31      33.672  32.244  12.343  1.00  0.00           O  
ATOM    121  N   ASP A  32      31.547  32.129  11.543  1.00  0.00           N  
ATOM    122  CA  ASP A  32      31.448  33.385  10.844  1.00  0.00           C  
ATOM    123  C   ASP A  32      31.641  34.545  11.824  1.00  0.00           C  
ATOM    124  O   ASP A  32      32.451  35.452  11.628  1.00  0.00           O  
ATOM    125  N   LYS A  33      30.944  34.487  12.954  1.00  0.00           N  
ATOM    126  CA  LYS A  33      30.955  35.422  14.063  1.00  0.00           C  
ATOM    127  C   LYS A  33      32.320  35.349  14.751  1.00  0.00           C  
ATOM    128  O   LYS A  33      33.041  36.331  14.589  1.00  0.00           O  
ATOM    129  N   GLU A  34      32.656  34.258  15.434  1.00  0.00           N  
ATOM    130  CA  GLU A  34      33.861  34.220  16.227  1.00  0.00           C  
ATOM    131  C   GLU A  34      35.202  33.797  15.614  1.00  0.00           C  
ATOM    132  O   GLU A  34      36.184  34.284  16.149  1.00  0.00           O  
ATOM    133  N   GLY A  35      35.250  32.889  14.643  1.00  0.00           N  
ATOM    134  CA  GLY A  35      36.408  32.480  13.860  1.00  0.00           C  
ATOM    135  C   GLY A  35      36.946  31.093  14.207  1.00  0.00           C  
ATOM    136  O   GLY A  35      37.911  30.637  13.591  1.00  0.00           O  
ATOM    137  N   ILE A  36      36.235  30.408  15.090  1.00  0.00           N  
ATOM    138  CA  ILE A  36      36.738  29.135  15.570  1.00  0.00           C  
ATOM    139  C   ILE A  36      36.054  28.160  14.607  1.00  0.00           C  
ATOM    140  O   ILE A  36      34.828  28.236  14.519  1.00  0.00           O  
ATOM    141  N   PRO A  37      36.796  27.193  14.091  1.00  0.00           N  
ATOM    142  CA  PRO A  37      36.175  26.175  13.264  1.00  0.00           C  
ATOM    143  C   PRO A  37      35.466  25.129  14.129  1.00  0.00           C  
ATOM    144  O   PRO A  37      35.873  25.037  15.286  1.00  0.00           O  
ATOM    145  N   PRO A  38      34.374  24.524  13.686  1.00  0.00           N  
ATOM    146  CA  PRO A  38      33.464  23.662  14.408  1.00  0.00           C  
ATOM    147  C   PRO A  38      34.037  22.450  15.140  1.00  0.00           C  
ATOM    148  O   PRO A  38      33.580  22.016  16.195  1.00  0.00           O  
ATOM    149  N   ASP A  39      35.132  21.877  14.633  1.00  0.00           N  
ATOM    150  CA  ASP A  39      35.891  20.728  15.086  1.00  0.00           C  
ATOM    151  C   ASP A  39      36.463  20.992  16.482  1.00  0.00           C  
ATOM    152  O   ASP A  39      36.568  20.051  17.269  1.00  0.00           O  
ATOM    153  N   GLN A  40      36.691  22.260  16.817  1.00  0.00           N  
ATOM    154  CA  GLN A  40      37.165  22.677  18.119  1.00  0.00           C  
ATOM    155  C   GLN A  40      36.031  23.002  19.092  1.00  0.00           C  
ATOM    156  O   GLN A  40      36.299  22.989  20.288  1.00  0.00           O  
ATOM    157  N   GLN A  41      34.772  23.150  18.702  1.00  0.00           N  
ATOM    158  CA  GLN A  41      33.732  23.572  19.619  1.00  0.00           C  
ATOM    159  C   GLN A  41      33.080  22.381  20.321  1.00  0.00           C  
ATOM    160  O   GLN A  41      32.515  21.476  19.717  1.00  0.00           O  
ATOM    161  N   ARG A  42      33.156  22.414  21.650  1.00  0.00           N  
ATOM    162  CA  ARG A  42      32.160  21.783  22.496  1.00  0.00           C  
ATOM    163  C   ARG A  42      31.060  22.824  22.725  1.00  0.00           C  
ATOM    164  O   ARG A  42      31.263  23.788  23.463  1.00  0.00           O  
ATOM    165  N   LEU A  43      29.883  22.606  22.142  1.00  0.00           N  
ATOM    166  CA  LEU A  43      28.631  23.129  22.660  1.00  0.00           C  
ATOM    167  C   LEU A  43      27.911  22.179  23.609  1.00  0.00           C  
ATOM    168  O   LEU A  43      27.167  21.330  23.120  1.00  0.00           O  
ATOM    169  N   ILE A  44      28.135  22.262  24.916  1.00  0.00           N  
ATOM    170  CA  ILE A  44      27.672  21.387  25.978  1.00  0.00           C  
ATOM    171  C   ILE A  44      26.427  22.067  26.544  1.00  0.00           C  
ATOM    172  O   ILE A  44      26.425  23.297  26.641  1.00  0.00           O  
ATOM    173  N   PHE A  45      25.389  21.274  26.802  1.00  0.00           N  
ATOM    174  CA  PHE A  45      24.101  21.754  27.243  1.00  0.00           C  
ATOM    175  C   PHE A  45      23.849  21.194  28.646  1.00  0.00           C  
ATOM    176  O   PHE A  45      24.862  20.987  29.319  1.00  0.00           O  
ATOM    177  N   ALA A  46      22.632  20.934  29.095  1.00  0.00           N  
ATOM    178  CA  ALA A  46      22.181  20.270  30.300  1.00  0.00           C  
ATOM    179  C   ALA A  46      22.662  18.828  30.476  1.00  0.00           C  
ATOM    180  O   ALA A  46      21.959  17.822  30.356  1.00  0.00           O  
ATOM    181  N   GLY A  47      23.984  18.800  30.647  1.00  0.00           N  
ATOM    182  CA  GLY A  47      24.924  17.711  30.560  1.00  0.00           C  
ATOM    183  C   GLY A  47      25.237  17.161  29.164  1.00  0.00           C  
ATOM    184  O   GLY A  47      26.369  16.751  28.912  1.00  0.00           O  
ATOM    185  N   LYS A  48      24.355  17.357  28.192  1.00  0.00           N  
ATOM    186  CA  LYS A  48      24.404  16.689  26.913  1.00  0.00           C  
ATOM    187  C   LYS A  48      25.357  17.353  25.913  1.00  0.00           C  
ATOM    188  O   LYS A  48      25.324  18.563  25.713  1.00  0.00           O  
ATOM    189  N   GLN A  49      26.212  16.490  25.365  1.00  0.00           N  
ATOM    190  CA  GLN A  49      27.187  16.969  24.409  1.00  0.00           C  
ATOM    191  C   GLN A  49      26.522  16.841  23.041  1.00  0.00           C  
ATOM    192  O   GLN A  49      26.354  15.764  22.471  1.00  0.00           O  
ATOM    193  N   LEU A  50      26.159  17.979  22.468  1.00  0.00           N  
ATOM    194  CA  LEU A  50      25.532  18.165  21.171  1.00  0.00           C  
ATOM    195  C   LEU A  50      26.425  17.739  20.006  1.00  0.00           C  
ATOM    196  O   LEU A  50      27.418  18.379  19.685  1.00  0.00           O  
ATOM    197  N   GLU A  51      26.076  16.608  19.384  1.00  0.00           N  
ATOM    198  CA  GLU A  51      26.757  15.910  18.312  1.00  0.00           C  
ATOM    199  C   GLU A  51      26.414  16.532  16.948  1.00  0.00           C  
ATOM    200  O   GLU A  51      25.295  16.972  16.700  1.00  0.00           O  
ATOM    201  N   ASP A  52      27.426  16.581  16.083  1.00  0.00           N  
ATOM    202  CA  ASP A  52      27.590  17.182  14.774  1.00  0.00           C  
ATOM    203  C   ASP A  52      26.708  16.456  13.763  1.00  0.00           C  
ATOM    204  O   ASP A  52      26.978  15.314  13.388  1.00  0.00           O  
ATOM    205  N   GLY A  53      25.641  17.079  13.258  1.00  0.00           N  
ATOM    206  CA  GLY A  53      24.568  16.577  12.420  1.00  0.00           C  
ATOM    207  C   GLY A  53      23.292  16.271  13.202  1.00  0.00           C  
ATOM    208  O   GLY A  53      22.309  16.148  12.475  1.00  0.00           O  
ATOM    209  N   ARG A  54      23.186  16.278  14.521  1.00  0.00           N  
ATOM    210  CA  ARG A  54      21.865  16.289  15.114  1.00  0.00           C  
ATOM    211  C   ARG A  54      21.234  17.680  14.979  1.00  0.00           C  
ATOM    212  O   ARG A  54      21.983  18.639  14.820  1.00  0.00           O  
ATOM    213  N   THR A  55      19.910  17.749  14.961  1.00  0.00           N  
ATOM    214  CA  THR A  55      19.152  18.984  15.056  1.00  0.00           C  
ATOM    215  C   THR A  55      19.173  19.394  16.531  1.00  0.00           C  
ATOM    216  O   THR A  55      19.512  18.649  17.454  1.00  0.00           O  
ATOM    217  N   LEU A  56      18.482  20.506  16.767  1.00  0.00           N  
ATOM    218  CA  LEU A  56      18.076  20.936  18.096  1.00  0.00           C  
ATOM    219  C   LEU A  56      16.878  20.167  18.641  1.00  0.00           C  
ATOM    220  O   LEU A  56      16.760  19.842  19.819  1.00  0.00           O  
ATOM    221  N   SER A  57      15.940  19.880  17.738  1.00  0.00           N  
ATOM    222  CA  SER A  57      14.762  19.069  17.970  1.00  0.00           C  
ATOM    223  C   SER A  57      15.132  17.632  18.346  1.00  0.00           C  
ATOM    224  O   SER A  57      14.334  17.140  19.140  1.00  0.00           O  
ATOM    225  N   ASP A  58      16.303  17.094  18.011  1.00  0.00           N  
ATOM    226  CA  ASP A  58      16.625  15.748  18.436  1.00  0.00           C  
ATOM    227  C   ASP A  58      16.850  15.738  19.951  1.00  0.00           C  
ATOM    228  O   ASP A  58      16.403  14.806  20.618  1.00  0.00           O  
ATOM    229  N   TYR A  59      17.421  16.786  20.512  1.00  0.00           N  
ATOM    230  CA  TYR A  59      17.736  16.998  21.917  1.00  0.00           C  
ATOM    231  C   TYR A  59      16.665  17.903  22.535  1.00  0.00           C  
ATOM    232  O   TYR A  59      16.831  18.395  23.647  1.00  0.00           O  
ATOM    233  N   ASN A  60      15.583  18.207  21.830  1.00  0.00           N  
ATOM    234  CA  ASN A  60      14.406  18.887  22.324  1.00  0.00           C  
ATOM    235  C   ASN A  60      14.661  20.220  23.037  1.00  0.00           C  
ATOM    236  O   ASN A  60      14.146  20.391  24.149  1.00  0.00           O  
ATOM    237  N   ILE A  61      15.487  21.070  22.447  1.00  0.00           N  
ATOM    238  CA  ILE A  61      15.989  22.224  23.168  1.00  0.00           C  
ATOM    239  C   ILE A  61      15.082  23.431  22.923  1.00  0.00           C  
ATOM    240  O   ILE A  61      14.723  23.798  21.806  1.00  0.00           O  
ATOM    241  N   GLN A  62      14.444  23.977  23.951  1.00  0.00           N  
ATOM    242  CA  GLN A  62      13.496  25.074  23.928  1.00  0.00           C  
ATOM    243  C   GLN A  62      14.130  26.410  24.300  1.00  0.00           C  
ATOM    244  O   GLN A  62      15.321  26.517  24.565  1.00  0.00           O  
ATOM    245  N   LYS A  63      13.362  27.476  24.072  1.00  0.00           N  
ATOM    246  CA  LYS A  63      13.699  28.862  24.324  1.00  0.00           C  
ATOM    247  C   LYS A  63      14.505  29.116  25.594  1.00  0.00           C  
ATOM    248  O   LYS A  63      14.356  28.288  26.490  1.00  0.00           O  
ATOM    249  N   GLU A  64      15.319  30.167  25.658  1.00  0.00           N  
ATOM    250  CA  GLU A  64      15.926  30.639  26.887  1.00  0.00           C  
ATOM    251  C   GLU A  64      17.118  29.845  27.416  1.00  0.00           C  
ATOM    252  O   GLU A  64      17.830  30.310  28.304  1.00  0.00           O  
ATOM    253  N   SER A  65      17.433  28.669  26.873  1.00  0.00           N  
ATOM    254  CA  SER A  65      18.545  27.820  27.260  1.00  0.00           C  
ATOM    255  C   SER A  65      19.943  28.411  27.071  1.00  0.00           C  
ATOM    256  O   SER A  65      20.226  28.851  25.956  1.00  0.00           O  
ATOM    257  N   THR A  66      20.799  28.316  28.085  1.00  0.00           N  
ATOM    258  CA  THR A  66      22.158  28.803  27.996  1.00  0.00           C  
ATOM    259  C   THR A  66      22.986  27.518  27.966  1.00  0.00           C  
ATOM    260  O   THR A  66      23.221  26.798  28.930  1.00  0.00           O  
ATOM    261  N   LEU A  67      23.574  27.296  26.789  1.00  0.00           N  
ATOM    262  CA  LEU A  67      24.565  26.313  26.400  1.00  0.00           C  
ATOM    263  C   LEU A  67      25.941  26.860  26.780  1.00  0.00           C  
ATOM    264  O   LEU A  67      26.276  28.036  26.698  1.00  0.00           O  
ATOM    265  N   HIS A  68      26.869  25.984  27.165  1.00  0.00           N  
ATOM    266  CA  HIS A  68      28.229  26.260  27.589  1.00  0.00           C  
ATOM    267  C   HIS A  68      29.254  25.920  26.493  1.00  0.00           C  
ATOM    268  O   HIS A  68      29.381  24.743  26.202  1.00  0.00           O  
ATOM    269  N   LEU A  69      29.827  27.014  25.990  1.00  0.00           N  
ATOM    270  CA  LEU A  69      30.733  26.804  24.878  1.00  0.00           C  
ATOM    271  C   LEU A  69      32.103  26.613  25.519  1.00  0.00           C  
ATOM    272  O   LEU A  69      32.501  27.502  26.265  1.00  0.00           O  
ATOM    273  N   VAL A  70      32.838  25.569  25.119  1.00  0.00           N  
ATOM    274  CA  VAL A  70      34.181  25.215  25.507  1.00  0.00           C  
ATOM    275  C   VAL A  70      34.932  24.537  24.354  1.00  0.00           C  
ATOM    276  O   VAL A  70      34.388  24.108  23.335  1.00  0.00           O  
TER
ENDMDL
MODEL      13
ATOM      1  N   GLN A   2      15.308  32.414  18.685  1.00  0.00           N  
ATOM      2  CA  GLN A   2      16.488  32.987  19.318  1.00  0.00           C  
ATOM      3  C   GLN A   2      16.800  32.185  20.578  1.00  0.00           C  
ATOM      4  O   GLN A   2      15.950  31.818  21.391  1.00  0.00           O  
ATOM      5  N   ILE A   3      18.098  31.975  20.785  1.00  0.00           N  
ATOM      6  CA  ILE A   3      18.569  31.381  22.015  1.00  0.00           C  
ATOM      7  C   ILE A   3      19.909  32.103  22.176  1.00  0.00           C  
ATOM      8  O   ILE A   3      20.599  32.599  21.281  1.00  0.00           O  
ATOM      9  N   PHE A   4      20.272  32.006  23.456  1.00  0.00           N  
ATOM     10  CA  PHE A   4      21.423  32.709  23.975  1.00  0.00           C  
ATOM     11  C   PHE A   4      22.504  31.631  24.155  1.00  0.00           C  
ATOM     12  O   PHE A   4      22.367  30.578  24.773  1.00  0.00           O  
ATOM     13  N   VAL A   5      23.702  31.979  23.708  1.00  0.00           N  
ATOM     14  CA  VAL A   5      24.908  31.239  24.022  1.00  0.00           C  
ATOM     15  C   VAL A   5      25.709  32.068  25.036  1.00  0.00           C  
ATOM     16  O   VAL A   5      25.932  33.257  24.806  1.00  0.00           O  
ATOM     17  N   LYS A   6      26.192  31.489  26.126  1.00  0.00           N  
ATOM     18  CA  LYS A   6      27.284  32.014  26.929  1.00  0.00           C  
ATOM     19  C   LYS A   6      28.516  31.482  26.190  1.00  0.00           C  
ATOM     20  O   LYS A   6      28.659  30.262  26.116  1.00  0.00           O  
ATOM     21  N   THR A   7      29.433  32.348  25.767  1.00  0.00           N  
ATOM     22  CA  THR A   7      30.685  32.056  25.095  1.00  0.00           C  
ATOM     23  C   THR A   7      31.842  31.618  25.984  1.00  0.00           C  
ATOM     24  O   THR A   7      31.761  31.719  27.209  1.00  0.00           O  
ATOM     25  N   LEU A   8      32.911  31.110  25.397  1.00  0.00           N  
ATOM     26  CA  LEU A   8      34.205  30.668  25.894  1.00  0.00           C  
ATOM     27  C   LEU A   8      35.012  31.774  26.583  1.00  0.00           C  
ATOM     28  O   LEU A   8      36.079  31.596  27.176  1.00  0.00           O  
ATOM     29  N   THR A   9      34.640  33.049  26.508  1.00  0.00           N  
ATOM     30  CA  THR A   9      35.311  34.197  27.099  1.00  0.00           C  
ATOM     31  C   THR A   9      34.495  35.067  28.059  1.00  0.00           C  
ATOM     32  O   THR A   9      34.963  36.110  28.508  1.00  0.00           O  
ATOM     33  N   GLY A  10      33.263  34.616  28.268  1.00  0.00           N  
ATOM     34  CA  GLY A  10      32.360  35.050  29.317  1.00  0.00           C  
ATOM     35  C   GLY A  10      31.118  35.845  28.909  1.00  0.00           C  
ATOM     36  O   GLY A  10      30.191  36.006  29.711  1.00  0.00           O  
ATOM     37  N   LYS A  11      31.027  36.359  27.683  1.00  0.00           N  
ATOM     38  CA  LYS A  11      29.945  37.139  27.134  1.00  0.00           C  
ATOM     39  C   LYS A  11      28.820  36.224  26.645  1.00  0.00           C  
ATOM     40  O   LYS A  11      29.049  35.060  26.319  1.00  0.00           O  
ATOM     41  N   THR A  12      27.678  36.847  26.372  1.00  0.00           N  
ATOM     42  CA  THR A  12      26.410  36.304  25.919  1.00  0.00           C  
ATOM     43  C   THR A  12      26.234  36.817  24.488  1.00  0.00           C  
ATOM     44  O   THR A  12      26.214  38.044  24.352  1.00  0.00           O  
ATOM     45  N   ILE A  13      26.097  35.954  23.487  1.00  0.00           N  
ATOM     46  CA  ILE A  13      25.610  36.192  22.145  1.00  0.00           C  
ATOM     47  C   ILE A  13      24.189  35.624  22.161  1.00  0.00           C  
ATOM     48  O   ILE A  13      23.836  34.693  22.891  1.00  0.00           O  
ATOM     49  N   THR A  14      23.308  36.269  21.402  1.00  0.00           N  
ATOM     50  CA  THR A  14      22.144  35.753  20.719  1.00  0.00           C  
ATOM     51  C   THR A  14      22.564  35.043  19.441  1.00  0.00           C  
ATOM     52  O   THR A  14      23.568  35.421  18.840  1.00  0.00           O  
ATOM     53  N   LEU A  15      21.796  34.075  18.954  1.00  0.00           N  
ATOM     54  CA  LEU A  15      21.911  33.628  17.578  1.00  0.00           C  
ATOM     55  C   LEU A  15      20.496  33.225  17.152  1.00  0.00           C  
ATOM     56  O   LEU A  15      19.585  32.837  17.886  1.00  0.00           O  
ATOM     57  N   GLU A  16      20.321  33.199  15.837  1.00  0.00           N  
ATOM     58  CA  GLU A  16      19.046  33.034  15.152  1.00  0.00           C  
ATOM     59  C   GLU A  16      19.150  31.775  14.279  1.00  0.00           C  
ATOM     60  O   GLU A  16      19.879  31.614  13.308  1.00  0.00           O  
ATOM     61  N   VAL A  17      18.392  30.745  14.635  1.00  0.00           N  
ATOM     62  CA  VAL A  17      18.337  29.390  14.116  1.00  0.00           C  
ATOM     63  C   VAL A  17      16.861  28.986  14.027  1.00  0.00           C  
ATOM     64  O   VAL A  17      16.025  29.489  14.769  1.00  0.00           O  
ATOM     65  N   GLU A  18      16.512  27.914  13.312  1.00  0.00           N  
ATOM     66  CA  GLU A  18      15.273  27.189  13.421  1.00  0.00           C  
ATOM     67  C   GLU A  18      15.533  25.892  14.181  1.00  0.00           C  
ATOM     68  O   GLU A  18      16.656  25.419  14.035  1.00  0.00           O  
ATOM     69  N   PRO A  19      14.625  25.298  14.952  1.00  0.00           N  
ATOM     70  CA  PRO A  19      14.820  24.048  15.662  1.00  0.00           C  
ATOM     71  C   PRO A  19      15.287  22.889  14.781  1.00  0.00           C  
ATOM     72  O   PRO A  19      15.989  21.979  15.206  1.00  0.00           O  
ATOM     73  N   SER A  20      15.078  23.061  13.474  1.00  0.00           N  
ATOM     74  CA  SER A  20      15.645  22.149  12.493  1.00  0.00           C  
ATOM     75  C   SER A  20      17.127  22.264  12.132  1.00  0.00           C  
ATOM     76  O   SER A  20      17.654  21.412  11.419  1.00  0.00           O  
ATOM     77  N   ASP A  21      17.757  23.313  12.639  1.00  0.00           N  
ATOM     78  CA  ASP A  21      19.206  23.403  12.682  1.00  0.00           C  
ATOM     79  C   ASP A  21      19.795  22.266  13.506  1.00  0.00           C  
ATOM     80  O   ASP A  21      19.498  22.079  14.686  1.00  0.00           O  
ATOM     81  N   THR A  22      20.741  21.527  12.934  1.00  0.00           N  
ATOM     82  CA  THR A  22      21.449  20.577  13.779  1.00  0.00           C  
ATOM     83  C   THR A  22      22.661  21.268  14.393  1.00  0.00           C  
ATOM     84  O   THR A  22      23.112  22.240  13.795  1.00  0.00           O  
ATOM     85  N   ILE A  23      23.231  20.664  15.438  1.00  0.00           N  
ATOM     86  CA  ILE A  23      24.450  21.003  16.142  1.00  0.00           C  
ATOM     87  C   ILE A  23      25.539  21.574  15.234  1.00  0.00           C  
ATOM     88  O   ILE A  23      26.051  22.603  15.681  1.00  0.00           O  
ATOM     89  N   GLU A  24      25.918  20.954  14.124  1.00  0.00           N  
ATOM     90  CA  GLU A  24      26.929  21.338  13.154  1.00  0.00           C  
ATOM     91  C   GLU A  24      26.600  22.600  12.353  1.00  0.00           C  
ATOM     92  O   GLU A  24      27.513  23.312  11.930  1.00  0.00           O  
ATOM     93  N   ASN A  25      25.317  22.934  12.238  1.00  0.00           N  
ATOM     94  CA  ASN A  25      24.915  24.245  11.757  1.00  0.00           C  
ATOM     95  C   ASN A  25      25.097  25.411  12.735  1.00  0.00           C  
ATOM     96  O   ASN A  25      25.535  26.491  12.355  1.00  0.00           O  
ATOM     97  N   VAL A  26      24.812  25.255  14.025  1.00  0.00           N  
ATOM     98  CA  VAL A  26      24.906  26.341  14.973  1.00  0.00           C  
ATOM     99  C   VAL A  26      26.391  26.660  15.105  1.00  0.00           C  
ATOM    100  O   VAL A  26      26.748  27.834  15.100  1.00  0.00           O  
ATOM    101  N   LYS A  27      27.258  25.647  15.151  1.00  0.00           N  
ATOM    102  CA  LYS A  27      28.709  25.673  15.134  1.00  0.00           C  
ATOM    103  C   LYS A  27      29.401  26.613  14.152  1.00  0.00           C  
ATOM    104  O   LYS A  27      30.233  27.465  14.473  1.00  0.00           O  
ATOM    105  N   ALA A  28      28.876  26.561  12.930  1.00  0.00           N  
ATOM    106  CA  ALA A  28      29.300  27.321  11.770  1.00  0.00           C  
ATOM    107  C   ALA A  28      28.765  28.760  11.865  1.00  0.00           C  
ATOM    108  O   ALA A  28      29.428  29.733  11.543  1.00  0.00           O  
ATOM    109  N   LYS A  29      27.547  28.921  12.373  1.00  0.00           N  
ATOM    110  CA  LYS A  29      26.853  30.172  12.615  1.00  0.00           C  
ATOM    111  C   LYS A  29      27.610  31.048  13.614  1.00  0.00           C  
ATOM    112  O   LYS A  29      27.833  32.248  13.468  1.00  0.00           O  
ATOM    113  N   ILE A  30      28.066  30.358  14.652  1.00  0.00           N  
ATOM    114  CA  ILE A  30      28.914  30.823  15.723  1.00  0.00           C  
ATOM    115  C   ILE A  30      30.226  31.296  15.091  1.00  0.00           C  
ATOM    116  O   ILE A  30      30.629  32.446  15.290  1.00  0.00           O  
ATOM    117  N   GLN A  31      30.944  30.521  14.276  1.00  0.00           N  
ATOM    118  CA  GLN A  31      32.011  30.982  13.421  1.00  0.00           C  
ATOM    119  C   GLN A  31      31.693  32.212  12.546  1.00  0.00           C  
ATOM    120  O   GLN A  31      32.471  33.161  12.619  1.00  0.00           O  
ATOM    121  N   ASP A  32      30.579  32.253  11.832  1.00  0.00           N  
ATOM    122  CA  ASP A  32      30.225  33.346  10.952  1.00  0.00           C  
ATOM    123  C   ASP A  32      30.141  34.658  11.722  1.00  0.00           C  
ATOM    124  O   ASP A  32      30.570  35.664  11.155  1.00  0.00           O  
ATOM    125  N   LYS A  33      29.732  34.742  12.984  1.00  0.00           N  
ATOM    126  CA  LYS A  33      29.484  35.941  13.755  1.00  0.00           C  
ATOM    127  C   LYS A  33      30.730  36.219  14.592  1.00  0.00           C  
ATOM    128  O   LYS A  33      31.202  37.355  14.516  1.00  0.00           O  
ATOM    129  N   GLU A  34      31.279  35.285  15.361  1.00  0.00           N  
ATOM    130  CA  GLU A  34      32.295  35.464  16.381  1.00  0.00           C  
ATOM    131  C   GLU A  34      33.684  35.037  15.930  1.00  0.00           C  
ATOM    132  O   GLU A  34      34.621  35.709  16.365  1.00  0.00           O  
ATOM    133  N   GLY A  35      33.841  34.050  15.052  1.00  0.00           N  
ATOM    134  CA  GLY A  35      35.057  33.781  14.302  1.00  0.00           C  
ATOM    135  C   GLY A  35      35.682  32.485  14.836  1.00  0.00           C  
ATOM    136  O   GLY A  35      36.870  32.273  14.604  1.00  0.00           O  
ATOM    137  N   ILE A  36      34.980  31.738  15.685  1.00  0.00           N  
ATOM    138  CA  ILE A  36      35.603  30.726  16.523  1.00  0.00           C  
ATOM    139  C   ILE A  36      35.596  29.402  15.751  1.00  0.00           C  
ATOM    140  O   ILE A  36      34.559  29.010  15.215  1.00  0.00           O  
ATOM    141  N   PRO A  37      36.716  28.718  15.587  1.00  0.00           N  
ATOM    142  CA  PRO A  37      36.821  27.427  14.937  1.00  0.00           C  
ATOM    143  C   PRO A  37      35.856  26.372  15.470  1.00  0.00           C  
ATOM    144  O   PRO A  37      35.926  26.052  16.654  1.00  0.00           O  
ATOM    145  N   PRO A  38      35.094  25.652  14.634  1.00  0.00           N  
ATOM    146  CA  PRO A  38      34.279  24.544  15.091  1.00  0.00           C  
ATOM    147  C   PRO A  38      35.092  23.299  15.467  1.00  0.00           C  
ATOM    148  O   PRO A  38      34.541  22.456  16.162  1.00  0.00           O  
ATOM    149  N   ASP A  39      36.404  23.363  15.278  1.00  0.00           N  
ATOM    150  CA  ASP A  39      37.349  22.474  15.927  1.00  0.00           C  
ATOM    151  C   ASP A  39      37.671  22.851  17.372  1.00  0.00           C  
ATOM    152  O   ASP A  39      38.010  21.978  18.164  1.00  0.00           O  
ATOM    153  N   GLN A  40      37.324  24.058  17.821  1.00  0.00           N  
ATOM    154  CA  GLN A  40      37.564  24.578  19.153  1.00  0.00           C  
ATOM    155  C   GLN A  40      36.285  24.415  19.977  1.00  0.00           C  
ATOM    156  O   GLN A  40      36.380  24.268  21.190  1.00  0.00           O  
ATOM    157  N   GLN A  41      35.156  24.383  19.271  1.00  0.00           N  
ATOM    158  CA  GLN A  41      33.840  24.389  19.871  1.00  0.00           C  
ATOM    159  C   GLN A  41      33.442  22.943  20.213  1.00  0.00           C  
ATOM    160  O   GLN A  41      33.098  22.250  19.259  1.00  0.00           O  
ATOM    161  N   ARG A  42      33.368  22.654  21.503  1.00  0.00           N  
ATOM    162  CA  ARG A  42      32.511  21.561  21.952  1.00  0.00           C  
ATOM    163  C   ARG A  42      31.290  22.205  22.594  1.00  0.00           C  
ATOM    164  O   ARG A  42      31.429  23.269  23.197  1.00  0.00           O  
ATOM    165  N   LEU A  43      30.146  21.542  22.495  1.00  0.00           N  
ATOM    166  CA  LEU A  43      28.931  21.593  23.300  1.00  0.00           C  
ATOM    167  C   LEU A  43      28.886  20.426  24.276  1.00  0.00           C  
ATOM    168  O   LEU A  43      28.806  19.311  23.751  1.00  0.00           O  
ATOM    169  N   ILE A  44      28.960  20.621  25.589  1.00  0.00           N  
ATOM    170  CA  ILE A  44      28.767  19.566  26.567  1.00  0.00           C  
ATOM    171  C   ILE A  44      27.611  20.107  27.417  1.00  0.00           C  
ATOM    172  O   ILE A  44      27.639  21.189  27.998  1.00  0.00           O  
ATOM    173  N   PHE A  45      26.543  19.315  27.402  1.00  0.00           N  
ATOM    174  CA  PHE A  45      25.256  19.740  27.907  1.00  0.00           C  
ATOM    175  C   PHE A  45      24.605  18.531  28.584  1.00  0.00           C  
ATOM    176  O   PHE A  45      24.176  17.595  27.921  1.00  0.00           O  
ATOM    177  N   ALA A  46      24.509  18.662  29.903  1.00  0.00           N  
ATOM    178  CA  ALA A  46      23.808  17.833  30.866  1.00  0.00           C  
ATOM    179  C   ALA A  46      24.518  16.496  31.113  1.00  0.00           C  
ATOM    180  O   ALA A  46      23.834  15.570  31.541  1.00  0.00           O  
ATOM    181  N   GLY A  47      25.823  16.410  30.893  1.00  0.00           N  
ATOM    182  CA  GLY A  47      26.598  15.206  31.111  1.00  0.00           C  
ATOM    183  C   GLY A  47      26.910  14.409  29.849  1.00  0.00           C  
ATOM    184  O   GLY A  47      27.521  13.359  30.028  1.00  0.00           O  
ATOM    185  N   LYS A  48      26.642  14.838  28.623  1.00  0.00           N  
ATOM    186  CA  LYS A  48      27.054  14.290  27.344  1.00  0.00           C  
ATOM    187  C   LYS A  48      27.438  15.456  26.424  1.00  0.00           C  
ATOM    188  O   LYS A  48      27.010  16.607  26.507  1.00  0.00           O  
ATOM    189  N   GLN A  49      28.364  15.090  25.544  1.00  0.00           N  
ATOM    190  CA  GLN A  49      28.603  15.849  24.343  1.00  0.00           C  
ATOM    191  C   GLN A  49      27.401  15.801  23.390  1.00  0.00           C  
ATOM    192  O   GLN A  49      26.880  14.737  23.082  1.00  0.00           O  
ATOM    193  N   LEU A  50      27.034  16.952  22.835  1.00  0.00           N  
ATOM    194  CA  LEU A  50      26.025  17.050  21.790  1.00  0.00           C  
ATOM    195  C   LEU A  50      26.734  16.964  20.442  1.00  0.00           C  
ATOM    196  O   LEU A  50      27.815  17.537  20.329  1.00  0.00           O  
ATOM    197  N   GLU A  51      26.103  16.434  19.402  1.00  0.00           N  
ATOM    198  CA  GLU A  51      26.691  15.721  18.286  1.00  0.00           C  
ATOM    199  C   GLU A  51      26.050  15.992  16.924  1.00  0.00           C  
ATOM    200  O   GLU A  51      24.865  16.335  16.957  1.00  0.00           O  
ATOM    201  N   ASP A  52      26.681  15.597  15.828  1.00  0.00           N  
ATOM    202  CA  ASP A  52      26.284  15.831  14.455  1.00  0.00           C  
ATOM    203  C   ASP A  52      25.026  15.086  14.009  1.00  0.00           C  
ATOM    204  O   ASP A  52      24.907  13.879  14.157  1.00  0.00           O  
ATOM    205  N   GLY A  53      24.003  15.815  13.539  1.00  0.00           N  
ATOM    206  CA  GLY A  53      22.957  15.171  12.773  1.00  0.00           C  
ATOM    207  C   GLY A  53      21.622  15.180  13.534  1.00  0.00           C  
ATOM    208  O   GLY A  53      20.569  15.007  12.920  1.00  0.00           O  
ATOM    209  N   ARG A  54      21.700  15.324  14.853  1.00  0.00           N  
ATOM    210  CA  ARG A  54      20.585  15.582  15.748  1.00  0.00           C  
ATOM    211  C   ARG A  54      20.236  17.065  15.653  1.00  0.00           C  
ATOM    212  O   ARG A  54      21.125  17.911  15.697  1.00  0.00           O  
ATOM    213  N   THR A  55      18.936  17.369  15.623  1.00  0.00           N  
ATOM    214  CA  THR A  55      18.487  18.743  15.564  1.00  0.00           C  
ATOM    215  C   THR A  55      18.461  19.298  16.995  1.00  0.00           C  
ATOM    216  O   THR A  55      18.420  18.557  17.975  1.00  0.00           O  
ATOM    217  N   LEU A  56      18.541  20.610  17.173  1.00  0.00           N  
ATOM    218  CA  LEU A  56      18.130  21.286  18.386  1.00  0.00           C  
ATOM    219  C   LEU A  56      16.816  20.833  19.020  1.00  0.00           C  
ATOM    220  O   LEU A  56      16.709  20.510  20.205  1.00  0.00           O  
ATOM    221  N   SER A  57      15.802  20.543  18.213  1.00  0.00           N  
ATOM    222  CA  SER A  57      14.660  19.759  18.627  1.00  0.00           C  
ATOM    223  C   SER A  57      14.937  18.389  19.226  1.00  0.00           C  
ATOM    224  O   SER A  57      14.222  18.028  20.164  1.00  0.00           O  
ATOM    225  N   ASP A  58      15.787  17.524  18.678  1.00  0.00           N  
ATOM    226  CA  ASP A  58      16.107  16.208  19.201  1.00  0.00           C  
ATOM    227  C   ASP A  58      16.821  16.232  20.556  1.00  0.00           C  
ATOM    228  O   ASP A  58      16.854  15.234  21.261  1.00  0.00           O  
ATOM    229  N   TYR A  59      17.326  17.380  21.016  1.00  0.00           N  
ATOM    230  CA  TYR A  59      17.892  17.611  22.333  1.00  0.00           C  
ATOM    231  C   TYR A  59      16.935  18.397  23.229  1.00  0.00           C  
ATOM    232  O   TYR A  59      17.434  18.957  24.201  1.00  0.00           O  
ATOM    233  N   ASN A  60      15.683  18.584  22.802  1.00  0.00           N  
ATOM    234  CA  ASN A  60      14.597  19.343  23.387  1.00  0.00           C  
ATOM    235  C   ASN A  60      14.853  20.840  23.566  1.00  0.00           C  
ATOM    236  O   ASN A  60      14.253  21.465  24.430  1.00  0.00           O  
ATOM    237  N   ILE A  61      15.821  21.444  22.883  1.00  0.00           N  
ATOM    238  CA  ILE A  61      16.205  22.838  23.048  1.00  0.00           C  
ATOM    239  C   ILE A  61      15.056  23.608  22.399  1.00  0.00           C  
ATOM    240  O   ILE A  61      14.588  23.372  21.280  1.00  0.00           O  
ATOM    241  N   GLN A  62      14.504  24.453  23.261  1.00  0.00           N  
ATOM    242  CA  GLN A  62      13.439  25.422  23.071  1.00  0.00           C  
ATOM    243  C   GLN A  62      13.916  26.857  23.262  1.00  0.00           C  
ATOM    244  O   GLN A  62      14.852  27.175  23.993  1.00  0.00           O  
ATOM    245  N   LYS A  63      13.322  27.701  22.419  1.00  0.00           N  
ATOM    246  CA  LYS A  63      13.422  29.149  22.371  1.00  0.00           C  
ATOM    247  C   LYS A  63      13.671  29.852  23.708  1.00  0.00           C  
ATOM    248  O   LYS A  63      13.019  29.496  24.681  1.00  0.00           O  
ATOM    249  N   GLU A  64      14.629  30.766  23.776  1.00  0.00           N  
ATOM    250  CA  GLU A  64      14.860  31.771  24.796  1.00  0.00           C  
ATOM    251  C   GLU A  64      15.529  31.162  26.028  1.00  0.00           C  
ATOM    252  O   GLU A  64      15.388  31.683  27.138  1.00  0.00           O  
ATOM    253  N   SER A  65      16.210  30.048  25.822  1.00  0.00           N  
ATOM    254  CA  SER A  65      17.063  29.313  26.738  1.00  0.00           C  
ATOM    255  C   SER A  65      18.552  29.623  26.560  1.00  0.00           C  
ATOM    256  O   SER A  65      18.928  30.171  25.528  1.00  0.00           O  
ATOM    257  N   THR A  66      19.330  29.301  27.595  1.00  0.00           N  
ATOM    258  CA  THR A  66      20.759  29.538  27.569  1.00  0.00           C  
ATOM    259  C   THR A  66      21.527  28.238  27.308  1.00  0.00           C  
ATOM    260  O   THR A  66      21.155  27.316  28.024  1.00  0.00           O  
ATOM    261  N   LEU A  67      22.288  28.123  26.226  1.00  0.00           N  
ATOM    262  CA  LEU A  67      23.331  27.126  26.139  1.00  0.00           C  
ATOM    263  C   LEU A  67      24.638  27.764  26.602  1.00  0.00           C  
ATOM    264  O   LEU A  67      24.742  28.983  26.722  1.00  0.00           O  
ATOM    265  N   HIS A  68      25.641  26.955  26.933  1.00  0.00           N  
ATOM    266  CA  HIS A  68      27.007  27.312  27.239  1.00  0.00           C  
ATOM    267  C   HIS A  68      27.946  26.514  26.337  1.00  0.00           C  
ATOM    268  O   HIS A  68      27.504  25.554  25.699  1.00  0.00           O  
ATOM    269  N   LEU A  69      29.188  26.928  26.106  1.00  0.00           N  
ATOM    270  CA  LEU A  69      30.275  26.327  25.356  1.00  0.00           C  
ATOM    271  C   LEU A  69      31.456  25.953  26.249  1.00  0.00           C  
ATOM    272  O   LEU A  69      31.813  26.670  27.178  1.00  0.00           O  
ATOM    273  N   VAL A  70      32.183  24.903  25.866  1.00  0.00           N  
ATOM    274  CA  VAL A  70      33.311  24.317  26.564  1.00  0.00           C  
ATOM    275  C   VAL A  70      34.440  24.328  25.531  1.00  0.00           C  
ATOM    276  O   VAL A  70      34.400  23.631  24.522  1.00  0.00           O  
TER
ENDMDL
MODEL      14
ATOM      1  N   GLN A   2      14.607  31.476  19.330  1.00  0.00           N  
ATOM      2  CA  GLN A   2      15.755  32.307  19.641  1.00  0.00           C  
ATOM      3  C   GLN A   2      16.542  31.508  20.683  1.00  0.00           C  
ATOM      4  O   GLN A   2      15.965  30.990  21.639  1.00  0.00           O  
ATOM      5  N   ILE A   3      17.861  31.419  20.506  1.00  0.00           N  
ATOM      6  CA  ILE A   3      18.712  30.740  21.449  1.00  0.00           C  
ATOM      7  C   ILE A   3      19.682  31.787  22.023  1.00  0.00           C  
ATOM      8  O   ILE A   3      20.144  32.662  21.301  1.00  0.00           O  
ATOM      9  N   PHE A   4      20.156  31.664  23.260  1.00  0.00           N  
ATOM     10  CA  PHE A   4      21.321  32.356  23.762  1.00  0.00           C  
ATOM     11  C   PHE A   4      22.521  31.407  23.708  1.00  0.00           C  
ATOM     12  O   PHE A   4      22.295  30.201  23.720  1.00  0.00           O  
ATOM     13  N   VAL A   5      23.737  31.925  23.693  1.00  0.00           N  
ATOM     14  CA  VAL A   5      24.910  31.065  23.788  1.00  0.00           C  
ATOM     15  C   VAL A   5      25.932  31.762  24.686  1.00  0.00           C  
ATOM     16  O   VAL A   5      26.125  32.975  24.603  1.00  0.00           O  
ATOM     17  N   LYS A   6      26.565  30.986  25.553  1.00  0.00           N  
ATOM     18  CA  LYS A   6      27.679  31.342  26.406  1.00  0.00           C  
ATOM     19  C   LYS A   6      28.860  30.536  25.860  1.00  0.00           C  
ATOM     20  O   LYS A   6      28.800  29.337  25.607  1.00  0.00           O  
ATOM     21  N   THR A   7      29.913  31.320  25.628  1.00  0.00           N  
ATOM     22  CA  THR A   7      31.244  30.825  25.324  1.00  0.00           C  
ATOM     23  C   THR A   7      31.966  30.802  26.678  1.00  0.00           C  
ATOM     24  O   THR A   7      31.832  31.711  27.508  1.00  0.00           O  
ATOM     25  N   LEU A   8      32.749  29.748  26.872  1.00  0.00           N  
ATOM     26  CA  LEU A   8      33.776  29.493  27.857  1.00  0.00           C  
ATOM     27  C   LEU A   8      34.482  30.685  28.521  1.00  0.00           C  
ATOM     28  O   LEU A   8      34.812  30.634  29.703  1.00  0.00           O  
ATOM     29  N   THR A   9      34.805  31.753  27.813  1.00  0.00           N  
ATOM     30  CA  THR A   9      35.293  33.018  28.320  1.00  0.00           C  
ATOM     31  C   THR A   9      34.314  33.865  29.152  1.00  0.00           C  
ATOM     32  O   THR A   9      34.562  34.981  29.592  1.00  0.00           O  
ATOM     33  N   GLY A  10      33.059  33.449  29.135  1.00  0.00           N  
ATOM     34  CA  GLY A  10      31.959  34.064  29.845  1.00  0.00           C  
ATOM     35  C   GLY A  10      31.268  35.074  28.925  1.00  0.00           C  
ATOM     36  O   GLY A  10      30.365  35.782  29.361  1.00  0.00           O  
ATOM     37  N   LYS A  11      31.536  35.035  27.623  1.00  0.00           N  
ATOM     38  CA  LYS A  11      31.102  35.896  26.542  1.00  0.00           C  
ATOM     39  C   LYS A  11      29.814  35.273  25.995  1.00  0.00           C  
ATOM     40  O   LYS A  11      29.745  34.071  25.752  1.00  0.00           O  
ATOM     41  N   THR A  12      28.783  36.117  26.065  1.00  0.00           N  
ATOM     42  CA  THR A  12      27.390  35.856  25.752  1.00  0.00           C  
ATOM     43  C   THR A  12      27.153  36.509  24.389  1.00  0.00           C  
ATOM     44  O   THR A  12      27.626  37.600  24.086  1.00  0.00           O  
ATOM     45  N   ILE A  13      26.411  35.804  23.550  1.00  0.00           N  
ATOM     46  CA  ILE A  13      25.950  36.177  22.222  1.00  0.00           C  
ATOM     47  C   ILE A  13      24.559  35.566  22.111  1.00  0.00           C  
ATOM     48  O   ILE A  13      24.008  34.906  22.989  1.00  0.00           O  
ATOM     49  N   THR A  14      23.847  35.899  21.035  1.00  0.00           N  
ATOM     50  CA  THR A  14      22.579  35.299  20.669  1.00  0.00           C  
ATOM     51  C   THR A  14      22.449  35.056  19.166  1.00  0.00           C  
ATOM     52  O   THR A  14      22.804  35.986  18.450  1.00  0.00           O  
ATOM     53  N   LEU A  15      21.876  33.912  18.806  1.00  0.00           N  
ATOM     54  CA  LEU A  15      21.765  33.561  17.404  1.00  0.00           C  
ATOM     55  C   LEU A  15      20.312  33.117  17.200  1.00  0.00           C  
ATOM     56  O   LEU A  15      19.784  32.347  18.000  1.00  0.00           O  
ATOM     57  N   GLU A  16      19.610  33.585  16.184  1.00  0.00           N  
ATOM     58  CA  GLU A  16      18.308  33.130  15.725  1.00  0.00           C  
ATOM     59  C   GLU A  16      18.470  31.814  14.950  1.00  0.00           C  
ATOM     60  O   GLU A  16      19.112  31.765  13.900  1.00  0.00           O  
ATOM     61  N   VAL A  17      17.790  30.751  15.376  1.00  0.00           N  
ATOM     62  CA  VAL A  17      17.914  29.435  14.800  1.00  0.00           C  
ATOM     63  C   VAL A  17      16.496  28.898  14.618  1.00  0.00           C  
ATOM     64  O   VAL A  17      15.561  29.582  15.023  1.00  0.00           O  
ATOM     65  N   GLU A  18      16.325  27.641  14.192  1.00  0.00           N  
ATOM     66  CA  GLU A  18      15.103  26.862  14.229  1.00  0.00           C  
ATOM     67  C   GLU A  18      15.488  25.555  14.911  1.00  0.00           C  
ATOM     68  O   GLU A  18      16.678  25.259  14.922  1.00  0.00           O  
ATOM     69  N   PRO A  19      14.537  24.786  15.457  1.00  0.00           N  
ATOM     70  CA  PRO A  19      14.728  23.488  16.063  1.00  0.00           C  
ATOM     71  C   PRO A  19      15.374  22.486  15.111  1.00  0.00           C  
ATOM     72  O   PRO A  19      16.204  21.681  15.534  1.00  0.00           O  
ATOM     73  N   SER A  20      14.992  22.515  13.838  1.00  0.00           N  
ATOM     74  CA  SER A  20      15.487  21.540  12.891  1.00  0.00           C  
ATOM     75  C   SER A  20      16.899  21.945  12.463  1.00  0.00           C  
ATOM     76  O   SER A  20      17.508  21.275  11.627  1.00  0.00           O  
ATOM     77  N   ASP A  21      17.551  22.952  13.026  1.00  0.00           N  
ATOM     78  CA  ASP A  21      18.874  23.365  12.616  1.00  0.00           C  
ATOM     79  C   ASP A  21      19.875  22.383  13.226  1.00  0.00           C  
ATOM     80  O   ASP A  21      19.854  22.099  14.418  1.00  0.00           O  
ATOM     81  N   THR A  22      20.788  21.812  12.439  1.00  0.00           N  
ATOM     82  CA  THR A  22      21.960  21.043  12.803  1.00  0.00           C  
ATOM     83  C   THR A  22      22.823  21.809  13.805  1.00  0.00           C  
ATOM     84  O   THR A  22      22.889  23.038  13.798  1.00  0.00           O  
ATOM     85  N   ILE A  23      23.569  21.130  14.665  1.00  0.00           N  
ATOM     86  CA  ILE A  23      24.742  21.593  15.380  1.00  0.00           C  
ATOM     87  C   ILE A  23      25.802  22.139  14.429  1.00  0.00           C  
ATOM     88  O   ILE A  23      26.345  23.196  14.759  1.00  0.00           O  
ATOM     89  N   GLU A  24      25.992  21.492  13.279  1.00  0.00           N  
ATOM     90  CA  GLU A  24      26.809  21.929  12.172  1.00  0.00           C  
ATOM     91  C   GLU A  24      26.537  23.370  11.712  1.00  0.00           C  
ATOM     92  O   GLU A  24      27.457  24.180  11.655  1.00  0.00           O  
ATOM     93  N   ASN A  25      25.278  23.699  11.419  1.00  0.00           N  
ATOM     94  CA  ASN A  25      24.850  25.075  11.284  1.00  0.00           C  
ATOM     95  C   ASN A  25      25.112  26.049  12.436  1.00  0.00           C  
ATOM     96  O   ASN A  25      25.343  27.231  12.204  1.00  0.00           O  
ATOM     97  N   VAL A  26      25.036  25.626  13.698  1.00  0.00           N  
ATOM     98  CA  VAL A  26      25.171  26.486  14.856  1.00  0.00           C  
ATOM     99  C   VAL A  26      26.622  26.877  15.110  1.00  0.00           C  
ATOM    100  O   VAL A  26      26.928  28.062  15.221  1.00  0.00           O  
ATOM    101  N   LYS A  27      27.474  25.865  14.955  1.00  0.00           N  
ATOM    102  CA  LYS A  27      28.913  26.008  14.900  1.00  0.00           C  
ATOM    103  C   LYS A  27      29.404  26.820  13.699  1.00  0.00           C  
ATOM    104  O   LYS A  27      30.306  27.628  13.902  1.00  0.00           O  
ATOM    105  N   ALA A  28      28.768  26.719  12.529  1.00  0.00           N  
ATOM    106  CA  ALA A  28      29.098  27.447  11.323  1.00  0.00           C  
ATOM    107  C   ALA A  28      28.584  28.882  11.506  1.00  0.00           C  
ATOM    108  O   ALA A  28      29.233  29.836  11.089  1.00  0.00           O  
ATOM    109  N   LYS A  29      27.521  29.126  12.270  1.00  0.00           N  
ATOM    110  CA  LYS A  29      26.928  30.434  12.461  1.00  0.00           C  
ATOM    111  C   LYS A  29      27.684  31.192  13.550  1.00  0.00           C  
ATOM    112  O   LYS A  29      27.959  32.369  13.350  1.00  0.00           O  
ATOM    113  N   ILE A  30      28.037  30.590  14.687  1.00  0.00           N  
ATOM    114  CA  ILE A  30      28.984  31.003  15.705  1.00  0.00           C  
ATOM    115  C   ILE A  30      30.290  31.578  15.162  1.00  0.00           C  
ATOM    116  O   ILE A  30      30.803  32.625  15.561  1.00  0.00           O  
ATOM    117  N   GLN A  31      30.847  30.917  14.155  1.00  0.00           N  
ATOM    118  CA  GLN A  31      31.994  31.339  13.368  1.00  0.00           C  
ATOM    119  C   GLN A  31      31.870  32.694  12.663  1.00  0.00           C  
ATOM    120  O   GLN A  31      32.768  33.528  12.656  1.00  0.00           O  
ATOM    121  N   ASP A  32      30.694  32.888  12.074  1.00  0.00           N  
ATOM    122  CA  ASP A  32      30.346  34.079  11.323  1.00  0.00           C  
ATOM    123  C   ASP A  32      30.142  35.180  12.369  1.00  0.00           C  
ATOM    124  O   ASP A  32      30.536  36.306  12.073  1.00  0.00           O  
ATOM    125  N   LYS A  33      29.496  34.907  13.501  1.00  0.00           N  
ATOM    126  CA  LYS A  33      29.233  35.709  14.677  1.00  0.00           C  
ATOM    127  C   LYS A  33      30.468  36.144  15.474  1.00  0.00           C  
ATOM    128  O   LYS A  33      30.592  37.346  15.699  1.00  0.00           O  
ATOM    129  N   GLU A  34      31.420  35.278  15.831  1.00  0.00           N  
ATOM    130  CA  GLU A  34      32.485  35.648  16.733  1.00  0.00           C  
ATOM    131  C   GLU A  34      33.867  35.045  16.472  1.00  0.00           C  
ATOM    132  O   GLU A  34      34.873  35.280  17.143  1.00  0.00           O  
ATOM    133  N   GLY A  35      33.927  34.115  15.520  1.00  0.00           N  
ATOM    134  CA  GLY A  35      35.189  33.706  14.934  1.00  0.00           C  
ATOM    135  C   GLY A  35      35.580  32.252  15.177  1.00  0.00           C  
ATOM    136  O   GLY A  35      36.604  31.816  14.653  1.00  0.00           O  
ATOM    137  N   ILE A  36      34.772  31.489  15.908  1.00  0.00           N  
ATOM    138  CA  ILE A  36      35.109  30.227  16.538  1.00  0.00           C  
ATOM    139  C   ILE A  36      35.073  29.138  15.465  1.00  0.00           C  
ATOM    140  O   ILE A  36      33.970  28.944  14.981  1.00  0.00           O  
ATOM    141  N   PRO A  37      36.179  28.448  15.186  1.00  0.00           N  
ATOM    142  CA  PRO A  37      36.145  27.342  14.252  1.00  0.00           C  
ATOM    143  C   PRO A  37      35.354  26.119  14.726  1.00  0.00           C  
ATOM    144  O   PRO A  37      35.289  25.838  15.927  1.00  0.00           O  
ATOM    145  N   PRO A  38      34.750  25.370  13.822  1.00  0.00           N  
ATOM    146  CA  PRO A  38      33.746  24.394  14.197  1.00  0.00           C  
ATOM    147  C   PRO A  38      34.328  23.086  14.746  1.00  0.00           C  
ATOM    148  O   PRO A  38      33.815  22.594  15.744  1.00  0.00           O  
ATOM    149  N   ASP A  39      35.502  22.677  14.257  1.00  0.00           N  
ATOM    150  CA  ASP A  39      36.177  21.408  14.419  1.00  0.00           C  
ATOM    151  C   ASP A  39      37.022  21.378  15.697  1.00  0.00           C  
ATOM    152  O   ASP A  39      37.841  20.479  15.920  1.00  0.00           O  
ATOM    153  N   GLN A  40      36.917  22.406  16.526  1.00  0.00           N  
ATOM    154  CA  GLN A  40      37.602  22.732  17.766  1.00  0.00           C  
ATOM    155  C   GLN A  40      36.621  23.154  18.862  1.00  0.00           C  
ATOM    156  O   GLN A  40      37.062  23.285  19.996  1.00  0.00           O  
ATOM    157  N   GLN A  41      35.347  23.358  18.539  1.00  0.00           N  
ATOM    158  CA  GLN A  41      34.260  23.819  19.391  1.00  0.00           C  
ATOM    159  C   GLN A  41      33.415  22.604  19.743  1.00  0.00           C  
ATOM    160  O   GLN A  41      33.146  21.794  18.850  1.00  0.00           O  
ATOM    161  N   ARG A  42      32.965  22.507  20.990  1.00  0.00           N  
ATOM    162  CA  ARG A  42      32.310  21.316  21.499  1.00  0.00           C  
ATOM    163  C   ARG A  42      31.298  21.907  22.482  1.00  0.00           C  
ATOM    164  O   ARG A  42      31.587  22.903  23.144  1.00  0.00           O  
ATOM    165  N   LEU A  43      30.063  21.421  22.356  1.00  0.00           N  
ATOM    166  CA  LEU A  43      28.885  22.056  22.914  1.00  0.00           C  
ATOM    167  C   LEU A  43      28.279  21.164  23.991  1.00  0.00           C  
ATOM    168  O   LEU A  43      28.182  19.941  23.847  1.00  0.00           O  
ATOM    169  N   ILE A  44      27.786  21.766  25.072  1.00  0.00           N  
ATOM    170  CA  ILE A  44      27.171  21.270  26.286  1.00  0.00           C  
ATOM    171  C   ILE A  44      25.849  21.993  26.528  1.00  0.00           C  
ATOM    172  O   ILE A  44      25.699  23.210  26.384  1.00  0.00           O  
ATOM    173  N   PHE A  45      24.852  21.214  26.952  1.00  0.00           N  
ATOM    174  CA  PHE A  45      23.496  21.519  27.357  1.00  0.00           C  
ATOM    175  C   PHE A  45      23.032  20.488  28.390  1.00  0.00           C  
ATOM    176  O   PHE A  45      22.673  19.374  28.027  1.00  0.00           O  
ATOM    177  N   ALA A  46      22.853  20.905  29.642  1.00  0.00           N  
ATOM    178  CA  ALA A  46      22.281  20.069  30.670  1.00  0.00           C  
ATOM    179  C   ALA A  46      23.171  18.890  31.098  1.00  0.00           C  
ATOM    180  O   ALA A  46      22.656  17.801  31.340  1.00  0.00           O  
ATOM    181  N   GLY A  47      24.488  19.071  31.029  1.00  0.00           N  
ATOM    182  CA  GLY A  47      25.488  18.061  31.309  1.00  0.00           C  
ATOM    183  C   GLY A  47      25.784  17.206  30.074  1.00  0.00           C  
ATOM    184  O   GLY A  47      26.851  16.602  29.963  1.00  0.00           O  
ATOM    185  N   LYS A  48      24.851  17.134  29.134  1.00  0.00           N  
ATOM    186  CA  LYS A  48      24.987  16.357  27.914  1.00  0.00           C  
ATOM    187  C   LYS A  48      25.959  17.149  27.039  1.00  0.00           C  
ATOM    188  O   LYS A  48      25.647  18.276  26.660  1.00  0.00           O  
ATOM    189  N   GLN A  49      26.996  16.429  26.607  1.00  0.00           N  
ATOM    190  CA  GLN A  49      27.886  16.680  25.494  1.00  0.00           C  
ATOM    191  C   GLN A  49      27.082  16.415  24.219  1.00  0.00           C  
ATOM    192  O   GLN A  49      26.818  15.243  23.959  1.00  0.00           O  
ATOM    193  N   LEU A  50      26.779  17.462  23.471  1.00  0.00           N  
ATOM    194  CA  LEU A  50      26.006  17.361  22.246  1.00  0.00           C  
ATOM    195  C   LEU A  50      27.015  16.950  21.161  1.00  0.00           C  
ATOM    196  O   LEU A  50      28.069  17.540  20.950  1.00  0.00           O  
ATOM    197  N   GLU A  51      26.665  15.896  20.427  1.00  0.00           N  
ATOM    198  CA  GLU A  51      27.452  15.312  19.367  1.00  0.00           C  
ATOM    199  C   GLU A  51      27.349  16.137  18.076  1.00  0.00           C  
ATOM    200  O   GLU A  51      26.363  16.809  17.809  1.00  0.00           O  
ATOM    201  N   ASP A  52      28.330  15.945  17.209  1.00  0.00           N  
ATOM    202  CA  ASP A  52      28.301  16.530  15.883  1.00  0.00           C  
ATOM    203  C   ASP A  52      27.284  15.761  15.035  1.00  0.00           C  
ATOM    204  O   ASP A  52      27.345  14.538  15.017  1.00  0.00           O  
ATOM    205  N   GLY A  53      26.424  16.473  14.322  1.00  0.00           N  
ATOM    206  CA  GLY A  53      25.408  15.896  13.453  1.00  0.00           C  
ATOM    207  C   GLY A  53      24.020  15.936  14.099  1.00  0.00           C  
ATOM    208  O   GLY A  53      23.076  15.798  13.319  1.00  0.00           O  
ATOM    209  N   ARG A  54      23.831  16.156  15.391  1.00  0.00           N  
ATOM    210  CA  ARG A  54      22.534  16.349  16.019  1.00  0.00           C  
ATOM    211  C   ARG A  54      21.921  17.737  15.808  1.00  0.00           C  
ATOM    212  O   ARG A  54      22.649  18.603  15.315  1.00  0.00           O  
ATOM    213  N   THR A  55      20.607  17.785  15.996  1.00  0.00           N  
ATOM    214  CA  THR A  55      19.890  19.040  15.973  1.00  0.00           C  
ATOM    215  C   THR A  55      19.472  19.453  17.387  1.00  0.00           C  
ATOM    216  O   THR A  55      19.688  18.643  18.291  1.00  0.00           O  
ATOM    217  N   LEU A  56      18.764  20.564  17.526  1.00  0.00           N  
ATOM    218  CA  LEU A  56      18.153  21.101  18.723  1.00  0.00           C  
ATOM    219  C   LEU A  56      16.823  20.392  18.966  1.00  0.00           C  
ATOM    220  O   LEU A  56      16.308  20.363  20.080  1.00  0.00           O  
ATOM    221  N   SER A  57      16.253  19.730  17.952  1.00  0.00           N  
ATOM    222  CA  SER A  57      15.081  18.875  18.021  1.00  0.00           C  
ATOM    223  C   SER A  57      15.441  17.503  18.603  1.00  0.00           C  
ATOM    224  O   SER A  57      14.539  16.860  19.129  1.00  0.00           O  
ATOM    225  N   ASP A  58      16.692  17.097  18.396  1.00  0.00           N  
ATOM    226  CA  ASP A  58      17.177  15.892  19.041  1.00  0.00           C  
ATOM    227  C   ASP A  58      17.252  15.942  20.574  1.00  0.00           C  
ATOM    228  O   ASP A  58      17.198  14.981  21.340  1.00  0.00           O  
ATOM    229  N   TYR A  59      17.504  17.156  21.033  1.00  0.00           N  
ATOM    230  CA  TYR A  59      17.775  17.515  22.410  1.00  0.00           C  
ATOM    231  C   TYR A  59      16.752  18.460  23.060  1.00  0.00           C  
ATOM    232  O   TYR A  59      16.946  19.094  24.092  1.00  0.00           O  
ATOM    233  N   ASN A  60      15.638  18.720  22.382  1.00  0.00           N  
ATOM    234  CA  ASN A  60      14.431  19.290  22.949  1.00  0.00           C  
ATOM    235  C   ASN A  60      14.410  20.731  23.468  1.00  0.00           C  
ATOM    236  O   ASN A  60      13.832  21.116  24.477  1.00  0.00           O  
ATOM    237  N   ILE A  61      15.100  21.577  22.713  1.00  0.00           N  
ATOM    238  CA  ILE A  61      15.472  22.892  23.206  1.00  0.00           C  
ATOM    239  C   ILE A  61      14.386  23.932  22.913  1.00  0.00           C  
ATOM    240  O   ILE A  61      13.936  24.067  21.776  1.00  0.00           O  
ATOM    241  N   GLN A  62      13.989  24.647  23.965  1.00  0.00           N  
ATOM    242  CA  GLN A  62      12.964  25.674  23.924  1.00  0.00           C  
ATOM    243  C   GLN A  62      13.480  27.108  23.820  1.00  0.00           C  
ATOM    244  O   GLN A  62      14.662  27.432  23.865  1.00  0.00           O  
ATOM    245  N   LYS A  63      12.587  28.041  23.474  1.00  0.00           N  
ATOM    246  CA  LYS A  63      12.893  29.399  23.093  1.00  0.00           C  
ATOM    247  C   LYS A  63      13.522  30.088  24.309  1.00  0.00           C  
ATOM    248  O   LYS A  63      12.966  29.893  25.393  1.00  0.00           O  
ATOM    249  N   GLU A  64      14.685  30.701  24.121  1.00  0.00           N  
ATOM    250  CA  GLU A  64      15.389  31.490  25.109  1.00  0.00           C  
ATOM    251  C   GLU A  64      16.418  30.695  25.908  1.00  0.00           C  
ATOM    252  O   GLU A  64      17.007  31.150  26.884  1.00  0.00           O  
ATOM    253  N   SER A  65      16.646  29.425  25.605  1.00  0.00           N  
ATOM    254  CA  SER A  65      17.542  28.512  26.281  1.00  0.00           C  
ATOM    255  C   SER A  65      18.981  29.041  26.204  1.00  0.00           C  
ATOM    256  O   SER A  65      19.438  29.434  25.135  1.00  0.00           O  
ATOM    257  N   THR A  66      19.813  28.871  27.222  1.00  0.00           N  
ATOM    258  CA  THR A  66      21.232  29.147  27.186  1.00  0.00           C  
ATOM    259  C   THR A  66      22.092  27.940  26.812  1.00  0.00           C  
ATOM    260  O   THR A  66      22.069  26.980  27.589  1.00  0.00           O  
ATOM    261  N   LEU A  67      22.808  28.004  25.704  1.00  0.00           N  
ATOM    262  CA  LEU A  67      23.652  26.897  25.280  1.00  0.00           C  
ATOM    263  C   LEU A  67      25.111  27.269  25.504  1.00  0.00           C  
ATOM    264  O   LEU A  67      25.527  28.393  25.249  1.00  0.00           O  
ATOM    265  N   HIS A  68      25.885  26.348  26.076  1.00  0.00           N  
ATOM    266  CA  HIS A  68      27.235  26.627  26.508  1.00  0.00           C  
ATOM    267  C   HIS A  68      28.183  25.926  25.543  1.00  0.00           C  
ATOM    268  O   HIS A  68      27.865  24.826  25.071  1.00  0.00           O  
ATOM    269  N   LEU A  69      29.398  26.430  25.358  1.00  0.00           N  
ATOM    270  CA  LEU A  69      30.339  25.739  24.493  1.00  0.00           C  
ATOM    271  C   LEU A  69      31.745  25.947  25.077  1.00  0.00           C  
ATOM    272  O   LEU A  69      32.134  26.938  25.683  1.00  0.00           O  
ATOM    273  N   VAL A  70      32.660  25.031  24.774  1.00  0.00           N  
ATOM    274  CA  VAL A  70      34.046  24.894  25.169  1.00  0.00           C  
ATOM    275  C   VAL A  70      34.810  25.016  23.842  1.00  0.00           C  
ATOM    276  O   VAL A  70      34.373  24.566  22.791  1.00  0.00           O  
TER
ENDMDL
MODEL      15
ATOM      1  N   GLN A   2      15.066  32.014  19.608  1.00  0.00           N  
ATOM      2  CA  GLN A   2      16.327  32.474  20.126  1.00  0.00           C  
ATOM      3  C   GLN A   2      16.932  31.570  21.206  1.00  0.00           C  
ATOM      4  O   GLN A   2      16.208  31.175  22.113  1.00  0.00           O  
ATOM      5  N   ILE A   3      18.232  31.319  21.103  1.00  0.00           N  
ATOM      6  CA  ILE A   3      19.116  30.702  22.076  1.00  0.00           C  
ATOM      7  C   ILE A   3      20.267  31.604  22.522  1.00  0.00           C  
ATOM      8  O   ILE A   3      20.704  32.454  21.747  1.00  0.00           O  
ATOM      9  N   PHE A   4      20.729  31.487  23.763  1.00  0.00           N  
ATOM     10  CA  PHE A   4      21.931  32.080  24.323  1.00  0.00           C  
ATOM     11  C   PHE A   4      23.077  31.077  24.365  1.00  0.00           C  
ATOM     12  O   PHE A   4      22.902  30.033  24.985  1.00  0.00           O  
ATOM     13  N   VAL A   5      24.136  31.366  23.605  1.00  0.00           N  
ATOM     14  CA  VAL A   5      25.424  30.696  23.535  1.00  0.00           C  
ATOM     15  C   VAL A   5      26.244  31.414  24.601  1.00  0.00           C  
ATOM     16  O   VAL A   5      26.805  32.477  24.365  1.00  0.00           O  
ATOM     17  N   LYS A   6      26.393  30.827  25.783  1.00  0.00           N  
ATOM     18  CA  LYS A   6      27.405  31.238  26.744  1.00  0.00           C  
ATOM     19  C   LYS A   6      28.832  30.822  26.387  1.00  0.00           C  
ATOM     20  O   LYS A   6      29.003  29.902  25.599  1.00  0.00           O  
ATOM     21  N   THR A   7      29.836  31.522  26.914  1.00  0.00           N  
ATOM     22  CA  THR A   7      31.229  31.131  26.796  1.00  0.00           C  
ATOM     23  C   THR A   7      32.009  31.635  28.016  1.00  0.00           C  
ATOM     24  O   THR A   7      31.455  32.439  28.771  1.00  0.00           O  
ATOM     25  N   LEU A   8      33.216  31.157  28.302  1.00  0.00           N  
ATOM     26  CA  LEU A   8      34.062  31.363  29.465  1.00  0.00           C  
ATOM     27  C   LEU A   8      34.291  32.758  30.045  1.00  0.00           C  
ATOM     28  O   LEU A   8      34.295  32.997  31.253  1.00  0.00           O  
ATOM     29  N   THR A   9      34.447  33.743  29.165  1.00  0.00           N  
ATOM     30  CA  THR A   9      34.839  35.103  29.467  1.00  0.00           C  
ATOM     31  C   THR A   9      33.646  35.938  29.930  1.00  0.00           C  
ATOM     32  O   THR A   9      33.725  37.118  30.265  1.00  0.00           O  
ATOM     33  N   GLY A  10      32.443  35.383  29.982  1.00  0.00           N  
ATOM     34  CA  GLY A  10      31.238  36.012  30.467  1.00  0.00           C  
ATOM     35  C   GLY A  10      30.314  36.619  29.414  1.00  0.00           C  
ATOM     36  O   GLY A  10      29.451  37.454  29.685  1.00  0.00           O  
ATOM     37  N   LYS A  11      30.648  36.326  28.158  1.00  0.00           N  
ATOM     38  CA  LYS A  11      29.950  36.647  26.930  1.00  0.00           C  
ATOM     39  C   LYS A  11      28.761  35.679  26.831  1.00  0.00           C  
ATOM     40  O   LYS A  11      28.857  34.458  26.935  1.00  0.00           O  
ATOM     41  N   THR A  12      27.669  36.371  26.529  1.00  0.00           N  
ATOM     42  CA  THR A  12      26.493  35.728  25.991  1.00  0.00           C  
ATOM     43  C   THR A  12      26.412  36.280  24.566  1.00  0.00           C  
ATOM     44  O   THR A  12      26.496  37.479  24.328  1.00  0.00           O  
ATOM     45  N   ILE A  13      26.210  35.374  23.609  1.00  0.00           N  
ATOM     46  CA  ILE A  13      25.689  35.727  22.304  1.00  0.00           C  
ATOM     47  C   ILE A  13      24.210  35.333  22.305  1.00  0.00           C  
ATOM     48  O   ILE A  13      23.871  34.276  22.842  1.00  0.00           O  
ATOM     49  N   THR A  14      23.385  36.240  21.795  1.00  0.00           N  
ATOM     50  CA  THR A  14      22.051  35.931  21.323  1.00  0.00           C  
ATOM     51  C   THR A  14      22.076  35.364  19.906  1.00  0.00           C  
ATOM     52  O   THR A  14      22.562  36.002  18.966  1.00  0.00           O  
ATOM     53  N   LEU A  15      21.665  34.117  19.722  1.00  0.00           N  
ATOM     54  CA  LEU A  15      21.571  33.500  18.405  1.00  0.00           C  
ATOM     55  C   LEU A  15      20.187  33.074  17.920  1.00  0.00           C  
ATOM     56  O   LEU A  15      19.489  32.441  18.710  1.00  0.00           O  
ATOM     57  N   GLU A  16      19.749  33.434  16.722  1.00  0.00           N  
ATOM     58  CA  GLU A  16      18.532  32.890  16.149  1.00  0.00           C  
ATOM     59  C   GLU A  16      18.789  31.503  15.542  1.00  0.00           C  
ATOM     60  O   GLU A  16      19.800  31.212  14.904  1.00  0.00           O  
ATOM     61  N   VAL A  17      17.799  30.619  15.666  1.00  0.00           N  
ATOM     62  CA  VAL A  17      17.607  29.372  14.953  1.00  0.00           C  
ATOM     63  C   VAL A  17      16.108  29.108  14.761  1.00  0.00           C  
ATOM     64  O   VAL A  17      15.216  29.669  15.379  1.00  0.00           O  
ATOM     65  N   GLU A  18      15.922  28.119  13.893  1.00  0.00           N  
ATOM     66  CA  GLU A  18      14.773  27.230  13.833  1.00  0.00           C  
ATOM     67  C   GLU A  18      15.256  25.890  14.393  1.00  0.00           C  
ATOM     68  O   GLU A  18      16.435  25.553  14.275  1.00  0.00           O  
ATOM     69  N   PRO A  19      14.409  25.118  15.061  1.00  0.00           N  
ATOM     70  CA  PRO A  19      14.842  23.921  15.756  1.00  0.00           C  
ATOM     71  C   PRO A  19      15.131  22.795  14.758  1.00  0.00           C  
ATOM     72  O   PRO A  19      15.799  21.849  15.161  1.00  0.00           O  
ATOM     73  N   SER A  20      14.551  22.747  13.551  1.00  0.00           N  
ATOM     74  CA  SER A  20      14.847  21.810  12.500  1.00  0.00           C  
ATOM     75  C   SER A  20      16.247  21.829  11.873  1.00  0.00           C  
ATOM     76  O   SER A  20      16.630  20.865  11.217  1.00  0.00           O  
ATOM     77  N   ASP A  21      17.019  22.848  12.226  1.00  0.00           N  
ATOM     78  CA  ASP A  21      18.426  23.082  11.974  1.00  0.00           C  
ATOM     79  C   ASP A  21      19.302  22.086  12.742  1.00  0.00           C  
ATOM     80  O   ASP A  21      18.873  21.469  13.721  1.00  0.00           O  
ATOM     81  N   THR A  22      20.567  21.974  12.358  1.00  0.00           N  
ATOM     82  CA  THR A  22      21.523  20.926  12.668  1.00  0.00           C  
ATOM     83  C   THR A  22      22.718  21.654  13.298  1.00  0.00           C  
ATOM     84  O   THR A  22      23.117  22.768  12.978  1.00  0.00           O  
ATOM     85  N   ILE A  23      23.313  20.880  14.205  1.00  0.00           N  
ATOM     86  CA  ILE A  23      24.356  21.253  15.138  1.00  0.00           C  
ATOM     87  C   ILE A  23      25.589  21.844  14.451  1.00  0.00           C  
ATOM     88  O   ILE A  23      26.184  22.831  14.881  1.00  0.00           O  
ATOM     89  N   GLU A  24      26.039  21.129  13.412  1.00  0.00           N  
ATOM     90  CA  GLU A  24      27.210  21.571  12.688  1.00  0.00           C  
ATOM     91  C   GLU A  24      27.025  22.875  11.903  1.00  0.00           C  
ATOM     92  O   GLU A  24      27.982  23.628  11.813  1.00  0.00           O  
ATOM     93  N   ASN A  25      25.844  23.070  11.323  1.00  0.00           N  
ATOM     94  CA  ASN A  25      25.446  24.210  10.517  1.00  0.00           C  
ATOM     95  C   ASN A  25      25.434  25.386  11.505  1.00  0.00           C  
ATOM     96  O   ASN A  25      25.858  26.489  11.162  1.00  0.00           O  
ATOM     97  N   VAL A  26      24.970  25.194  12.729  1.00  0.00           N  
ATOM     98  CA  VAL A  26      24.915  26.199  13.787  1.00  0.00           C  
ATOM     99  C   VAL A  26      26.319  26.523  14.286  1.00  0.00           C  
ATOM    100  O   VAL A  26      26.678  27.690  14.351  1.00  0.00           O  
ATOM    101  N   LYS A  27      27.195  25.523  14.416  1.00  0.00           N  
ATOM    102  CA  LYS A  27      28.603  25.746  14.638  1.00  0.00           C  
ATOM    103  C   LYS A  27      29.334  26.607  13.595  1.00  0.00           C  
ATOM    104  O   LYS A  27      30.232  27.373  13.914  1.00  0.00           O  
ATOM    105  N   ALA A  28      28.854  26.572  12.353  1.00  0.00           N  
ATOM    106  CA  ALA A  28      29.245  27.530  11.343  1.00  0.00           C  
ATOM    107  C   ALA A  28      28.661  28.939  11.488  1.00  0.00           C  
ATOM    108  O   ALA A  28      29.414  29.899  11.580  1.00  0.00           O  
ATOM    109  N   LYS A  29      27.382  29.062  11.844  1.00  0.00           N  
ATOM    110  CA  LYS A  29      26.791  30.357  12.094  1.00  0.00           C  
ATOM    111  C   LYS A  29      27.468  31.000  13.309  1.00  0.00           C  
ATOM    112  O   LYS A  29      27.666  32.215  13.248  1.00  0.00           O  
ATOM    113  N   ILE A  30      27.954  30.323  14.337  1.00  0.00           N  
ATOM    114  CA  ILE A  30      28.849  30.747  15.408  1.00  0.00           C  
ATOM    115  C   ILE A  30      30.207  31.166  14.841  1.00  0.00           C  
ATOM    116  O   ILE A  30      30.737  32.168  15.317  1.00  0.00           O  
ATOM    117  N   GLN A  31      30.750  30.563  13.792  1.00  0.00           N  
ATOM    118  CA  GLN A  31      32.096  30.923  13.369  1.00  0.00           C  
ATOM    119  C   GLN A  31      31.995  32.304  12.712  1.00  0.00           C  
ATOM    120  O   GLN A  31      32.937  33.056  12.936  1.00  0.00           O  
ATOM    121  N   ASP A  32      30.961  32.625  11.939  1.00  0.00           N  
ATOM    122  CA  ASP A  32      30.589  33.949  11.482  1.00  0.00           C  
ATOM    123  C   ASP A  32      30.752  35.129  12.429  1.00  0.00           C  
ATOM    124  O   ASP A  32      31.212  36.212  12.081  1.00  0.00           O  
ATOM    125  N   LYS A  33      30.375  34.853  13.677  1.00  0.00           N  
ATOM    126  CA  LYS A  33      30.590  35.723  14.811  1.00  0.00           C  
ATOM    127  C   LYS A  33      31.997  35.650  15.435  1.00  0.00           C  
ATOM    128  O   LYS A  33      32.748  36.602  15.244  1.00  0.00           O  
ATOM    129  N   GLU A  34      32.323  34.569  16.132  1.00  0.00           N  
ATOM    130  CA  GLU A  34      33.525  34.461  16.936  1.00  0.00           C  
ATOM    131  C   GLU A  34      34.780  34.038  16.175  1.00  0.00           C  
ATOM    132  O   GLU A  34      35.857  34.411  16.640  1.00  0.00           O  
ATOM    133  N   GLY A  35      34.677  33.427  15.001  1.00  0.00           N  
ATOM    134  CA  GLY A  35      35.723  33.352  13.998  1.00  0.00           C  
ATOM    135  C   GLY A  35      36.402  31.986  14.016  1.00  0.00           C  
ATOM    136  O   GLY A  35      37.241  31.768  13.136  1.00  0.00           O  
ATOM    137  N   ILE A  36      36.107  31.162  15.019  1.00  0.00           N  
ATOM    138  CA  ILE A  36      36.849  29.948  15.257  1.00  0.00           C  
ATOM    139  C   ILE A  36      36.272  28.837  14.384  1.00  0.00           C  
ATOM    140  O   ILE A  36      35.066  28.608  14.301  1.00  0.00           O  
ATOM    141  N   PRO A  37      37.105  28.009  13.751  1.00  0.00           N  
ATOM    142  CA  PRO A  37      36.662  26.840  13.024  1.00  0.00           C  
ATOM    143  C   PRO A  37      35.832  25.876  13.866  1.00  0.00           C  
ATOM    144  O   PRO A  37      36.195  25.628  15.023  1.00  0.00           O  
ATOM    145  N   PRO A  38      34.779  25.307  13.290  1.00  0.00           N  
ATOM    146  CA  PRO A  38      33.970  24.296  13.943  1.00  0.00           C  
ATOM    147  C   PRO A  38      34.702  23.109  14.590  1.00  0.00           C  
ATOM    148  O   PRO A  38      34.281  22.574  15.601  1.00  0.00           O  
ATOM    149  N   ASP A  39      35.886  22.733  14.133  1.00  0.00           N  
ATOM    150  CA  ASP A  39      36.820  21.734  14.624  1.00  0.00           C  
ATOM    151  C   ASP A  39      37.030  21.783  16.146  1.00  0.00           C  
ATOM    152  O   ASP A  39      37.260  20.784  16.820  1.00  0.00           O  
ATOM    153  N   GLN A  40      37.074  22.993  16.690  1.00  0.00           N  
ATOM    154  CA  GLN A  40      37.417  23.327  18.053  1.00  0.00           C  
ATOM    155  C   GLN A  40      36.145  23.525  18.875  1.00  0.00           C  
ATOM    156  O   GLN A  40      36.225  23.788  20.072  1.00  0.00           O  
ATOM    157  N   GLN A  41      34.910  23.481  18.375  1.00  0.00           N  
ATOM    158  CA  GLN A  41      33.700  23.850  19.086  1.00  0.00           C  
ATOM    159  C   GLN A  41      32.926  22.680  19.683  1.00  0.00           C  
ATOM    160  O   GLN A  41      32.564  21.766  18.947  1.00  0.00           O  
ATOM    161  N   ARG A  42      32.761  22.610  21.008  1.00  0.00           N  
ATOM    162  CA  ARG A  42      31.806  21.782  21.705  1.00  0.00           C  
ATOM    163  C   ARG A  42      30.735  22.639  22.386  1.00  0.00           C  
ATOM    164  O   ARG A  42      30.985  23.344  23.363  1.00  0.00           O  
ATOM    165  N   LEU A  43      29.488  22.531  21.929  1.00  0.00           N  
ATOM    166  CA  LEU A  43      28.390  23.024  22.731  1.00  0.00           C  
ATOM    167  C   LEU A  43      27.996  21.968  23.757  1.00  0.00           C  
ATOM    168  O   LEU A  43      27.916  20.791  23.402  1.00  0.00           O  
ATOM    169  N   ILE A  44      27.605  22.312  24.983  1.00  0.00           N  
ATOM    170  CA  ILE A  44      27.195  21.349  25.993  1.00  0.00           C  
ATOM    171  C   ILE A  44      25.900  21.900  26.603  1.00  0.00           C  
ATOM    172  O   ILE A  44      25.683  23.109  26.616  1.00  0.00           O  
ATOM    173  N   PHE A  45      24.949  21.034  26.951  1.00  0.00           N  
ATOM    174  CA  PHE A  45      23.608  21.406  27.346  1.00  0.00           C  
ATOM    175  C   PHE A  45      23.281  20.529  28.555  1.00  0.00           C  
ATOM    176  O   PHE A  45      22.719  19.446  28.454  1.00  0.00           O  
ATOM    177  N   ALA A  46      23.737  21.035  29.704  1.00  0.00           N  
ATOM    178  CA  ALA A  46      23.460  20.743  31.095  1.00  0.00           C  
ATOM    179  C   ALA A  46      24.276  19.583  31.660  1.00  0.00           C  
ATOM    180  O   ALA A  46      23.880  18.889  32.587  1.00  0.00           O  
ATOM    181  N   GLY A  47      25.444  19.295  31.085  1.00  0.00           N  
ATOM    182  CA  GLY A  47      26.267  18.172  31.494  1.00  0.00           C  
ATOM    183  C   GLY A  47      26.363  17.062  30.439  1.00  0.00           C  
ATOM    184  O   GLY A  47      27.131  16.111  30.592  1.00  0.00           O  
ATOM    185  N   LYS A  48      25.659  17.267  29.336  1.00  0.00           N  
ATOM    186  CA  LYS A  48      25.613  16.421  28.156  1.00  0.00           C  
ATOM    187  C   LYS A  48      26.063  17.276  26.976  1.00  0.00           C  
ATOM    188  O   LYS A  48      25.581  18.380  26.707  1.00  0.00           O  
ATOM    189  N   GLN A  49      26.895  16.623  26.166  1.00  0.00           N  
ATOM    190  CA  GLN A  49      27.565  16.930  24.926  1.00  0.00           C  
ATOM    191  C   GLN A  49      26.528  16.918  23.792  1.00  0.00           C  
ATOM    192  O   GLN A  49      25.839  15.911  23.648  1.00  0.00           O  
ATOM    193  N   LEU A  50      26.450  17.961  22.984  1.00  0.00           N  
ATOM    194  CA  LEU A  50      25.688  17.928  21.749  1.00  0.00           C  
ATOM    195  C   LEU A  50      26.658  17.533  20.634  1.00  0.00           C  
ATOM    196  O   LEU A  50      27.818  17.951  20.635  1.00  0.00           O  
ATOM    197  N   GLU A  51      26.285  16.581  19.791  1.00  0.00           N  
ATOM    198  CA  GLU A  51      27.059  15.761  18.870  1.00  0.00           C  
ATOM    199  C   GLU A  51      26.352  15.712  17.508  1.00  0.00           C  
ATOM    200  O   GLU A  51      25.129  15.757  17.395  1.00  0.00           O  
ATOM    201  N   ASP A  52      27.215  15.658  16.499  1.00  0.00           N  
ATOM    202  CA  ASP A  52      26.771  15.956  15.151  1.00  0.00           C  
ATOM    203  C   ASP A  52      26.138  14.727  14.517  1.00  0.00           C  
ATOM    204  O   ASP A  52      26.507  13.583  14.767  1.00  0.00           O  
ATOM    205  N   GLY A  53      25.115  14.973  13.702  1.00  0.00           N  
ATOM    206  CA  GLY A  53      24.212  13.934  13.242  1.00  0.00           C  
ATOM    207  C   GLY A  53      22.766  14.028  13.736  1.00  0.00           C  
ATOM    208  O   GLY A  53      22.002  13.125  13.399  1.00  0.00           O  
ATOM    209  N   ARG A  54      22.400  15.080  14.464  1.00  0.00           N  
ATOM    210  CA  ARG A  54      21.053  15.265  14.964  1.00  0.00           C  
ATOM    211  C   ARG A  54      20.435  16.615  14.566  1.00  0.00           C  
ATOM    212  O   ARG A  54      21.074  17.422  13.895  1.00  0.00           O  
ATOM    213  N   THR A  55      19.180  16.903  14.914  1.00  0.00           N  
ATOM    214  CA  THR A  55      18.776  18.295  14.964  1.00  0.00           C  
ATOM    215  C   THR A  55      18.881  18.845  16.392  1.00  0.00           C  
ATOM    216  O   THR A  55      19.011  18.059  17.325  1.00  0.00           O  
ATOM    217  N   LEU A  56      18.631  20.146  16.562  1.00  0.00           N  
ATOM    218  CA  LEU A  56      18.260  20.708  17.848  1.00  0.00           C  
ATOM    219  C   LEU A  56      17.017  20.155  18.541  1.00  0.00           C  
ATOM    220  O   LEU A  56      16.949  20.140  19.767  1.00  0.00           O  
ATOM    221  N   SER A  57      16.029  19.710  17.766  1.00  0.00           N  
ATOM    222  CA  SER A  57      14.824  19.041  18.197  1.00  0.00           C  
ATOM    223  C   SER A  57      15.061  17.654  18.805  1.00  0.00           C  
ATOM    224  O   SER A  57      14.124  17.264  19.493  1.00  0.00           O  
ATOM    225  N   ASP A  58      16.140  16.969  18.451  1.00  0.00           N  
ATOM    226  CA  ASP A  58      16.449  15.694  19.081  1.00  0.00           C  
ATOM    227  C   ASP A  58      17.057  15.942  20.467  1.00  0.00           C  
ATOM    228  O   ASP A  58      17.072  15.045  21.299  1.00  0.00           O  
ATOM    229  N   TYR A  59      17.594  17.122  20.776  1.00  0.00           N  
ATOM    230  CA  TYR A  59      18.178  17.410  22.067  1.00  0.00           C  
ATOM    231  C   TYR A  59      17.280  18.362  22.863  1.00  0.00           C  
ATOM    232  O   TYR A  59      17.663  18.726  23.975  1.00  0.00           O  
ATOM    233  N   ASN A  60      16.091  18.659  22.348  1.00  0.00           N  
ATOM    234  CA  ASN A  60      14.962  19.254  23.046  1.00  0.00           C  
ATOM    235  C   ASN A  60      15.213  20.706  23.441  1.00  0.00           C  
ATOM    236  O   ASN A  60      14.653  21.258  24.382  1.00  0.00           O  
ATOM    237  N   ILE A  61      16.012  21.421  22.646  1.00  0.00           N  
ATOM    238  CA  ILE A  61      16.409  22.793  22.879  1.00  0.00           C  
ATOM    239  C   ILE A  61      15.281  23.745  22.464  1.00  0.00           C  
ATOM    240  O   ILE A  61      14.745  23.694  21.355  1.00  0.00           O  
ATOM    241  N   GLN A  62      14.845  24.551  23.424  1.00  0.00           N  
ATOM    242  CA  GLN A  62      13.762  25.510  23.311  1.00  0.00           C  
ATOM    243  C   GLN A  62      14.249  26.956  23.377  1.00  0.00           C  
ATOM    244  O   GLN A  62      15.389  27.212  23.761  1.00  0.00           O  
ATOM    245  N   LYS A  63      13.446  27.941  23.008  1.00  0.00           N  
ATOM    246  CA  LYS A  63      13.694  29.355  23.175  1.00  0.00           C  
ATOM    247  C   LYS A  63      14.187  29.782  24.553  1.00  0.00           C  
ATOM    248  O   LYS A  63      13.964  29.031  25.491  1.00  0.00           O  
ATOM    249  N   GLU A  64      15.079  30.771  24.651  1.00  0.00           N  
ATOM    250  CA  GLU A  64      15.602  31.406  25.834  1.00  0.00           C  
ATOM    251  C   GLU A  64      16.400  30.433  26.711  1.00  0.00           C  
ATOM    252  O   GLU A  64      16.667  30.660  27.881  1.00  0.00           O  
ATOM    253  N   SER A  65      16.872  29.348  26.113  1.00  0.00           N  
ATOM    254  CA  SER A  65      17.718  28.337  26.719  1.00  0.00           C  
ATOM    255  C   SER A  65      19.162  28.847  26.656  1.00  0.00           C  
ATOM    256  O   SER A  65      19.471  29.591  25.722  1.00  0.00           O  
ATOM    257  N   THR A  66      19.952  28.374  27.614  1.00  0.00           N  
ATOM    258  CA  THR A  66      21.364  28.680  27.716  1.00  0.00           C  
ATOM    259  C   THR A  66      22.144  27.411  27.378  1.00  0.00           C  
ATOM    260  O   THR A  66      22.025  26.394  28.060  1.00  0.00           O  
ATOM    261  N   LEU A  67      22.730  27.402  26.189  1.00  0.00           N  
ATOM    262  CA  LEU A  67      23.767  26.432  25.888  1.00  0.00           C  
ATOM    263  C   LEU A  67      25.035  27.050  26.478  1.00  0.00           C  
ATOM    264  O   LEU A  67      25.194  28.268  26.592  1.00  0.00           O  
ATOM    265  N   HIS A  68      26.037  26.241  26.830  1.00  0.00           N  
ATOM    266  CA  HIS A  68      27.373  26.715  27.122  1.00  0.00           C  
ATOM    267  C   HIS A  68      28.335  26.102  26.108  1.00  0.00           C  
ATOM    268  O   HIS A  68      28.035  24.993  25.654  1.00  0.00           O  
ATOM    269  N   LEU A  69      29.410  26.788  25.727  1.00  0.00           N  
ATOM    270  CA  LEU A  69      30.412  26.332  24.784  1.00  0.00           C  
ATOM    271  C   LEU A  69      31.661  26.063  25.623  1.00  0.00           C  
ATOM    272  O   LEU A  69      32.086  26.803  26.503  1.00  0.00           O  
ATOM    273  N   VAL A  70      32.411  25.068  25.164  1.00  0.00           N  
ATOM    274  CA  VAL A  70      33.722  24.635  25.622  1.00  0.00           C  
ATOM    275  C   VAL A  70      34.561  24.359  24.379  1.00  0.00           C  
ATOM    276  O   VAL A  70      33.926  24.439  23.325  1.00  0.00           O  
TER
ENDMDL
MODEL      16
ATOM      1  N   GLN A   2      15.212  31.852  19.236  1.00  0.00           N  
ATOM      2  CA  GLN A   2      16.245  32.488  20.030  1.00  0.00           C  
ATOM      3  C   GLN A   2      16.946  31.370  20.820  1.00  0.00           C  
ATOM      4  O   GLN A   2      16.198  30.517  21.301  1.00  0.00           O  
ATOM      5  N   ILE A   3      18.250  31.458  21.048  1.00  0.00           N  
ATOM      6  CA  ILE A   3      19.039  30.700  21.996  1.00  0.00           C  
ATOM      7  C   ILE A   3      20.144  31.644  22.484  1.00  0.00           C  
ATOM      8  O   ILE A   3      20.294  32.707  21.899  1.00  0.00           O  
ATOM      9  N   PHE A   4      20.871  31.147  23.483  1.00  0.00           N  
ATOM     10  CA  PHE A   4      21.971  31.940  23.993  1.00  0.00           C  
ATOM     11  C   PHE A   4      23.174  31.020  24.166  1.00  0.00           C  
ATOM     12  O   PHE A   4      22.948  29.937  24.712  1.00  0.00           O  
ATOM     13  N   VAL A   5      24.298  31.235  23.485  1.00  0.00           N  
ATOM     14  CA  VAL A   5      25.582  30.552  23.515  1.00  0.00           C  
ATOM     15  C   VAL A   5      26.360  31.385  24.529  1.00  0.00           C  
ATOM     16  O   VAL A   5      26.563  32.590  24.352  1.00  0.00           O  
ATOM     17  N   LYS A   6      26.963  30.740  25.525  1.00  0.00           N  
ATOM     18  CA  LYS A   6      27.873  31.310  26.496  1.00  0.00           C  
ATOM     19  C   LYS A   6      29.193  30.547  26.552  1.00  0.00           C  
ATOM     20  O   LYS A   6      29.326  29.325  26.690  1.00  0.00           O  
ATOM     21  N   THR A   7      30.256  31.316  26.372  1.00  0.00           N  
ATOM     22  CA  THR A   7      31.623  30.842  26.491  1.00  0.00           C  
ATOM     23  C   THR A   7      31.969  30.916  27.973  1.00  0.00           C  
ATOM     24  O   THR A   7      31.420  31.741  28.706  1.00  0.00           O  
ATOM     25  N   LEU A   8      32.871  30.063  28.473  1.00  0.00           N  
ATOM     26  CA  LEU A   8      33.454  29.961  29.793  1.00  0.00           C  
ATOM     27  C   LEU A   8      34.158  31.211  30.311  1.00  0.00           C  
ATOM     28  O   LEU A   8      34.386  31.275  31.517  1.00  0.00           O  
ATOM     29  N   THR A   9      34.362  32.202  29.441  1.00  0.00           N  
ATOM     30  CA  THR A   9      35.033  33.472  29.652  1.00  0.00           C  
ATOM     31  C   THR A   9      33.998  34.533  30.031  1.00  0.00           C  
ATOM     32  O   THR A   9      34.341  35.412  30.811  1.00  0.00           O  
ATOM     33  N   GLY A  10      32.720  34.384  29.666  1.00  0.00           N  
ATOM     34  CA  GLY A  10      31.620  35.236  30.050  1.00  0.00           C  
ATOM     35  C   GLY A  10      31.111  36.209  28.982  1.00  0.00           C  
ATOM     36  O   GLY A  10      30.859  37.385  29.234  1.00  0.00           O  
ATOM     37  N   LYS A  11      30.945  35.834  27.726  1.00  0.00           N  
ATOM     38  CA  LYS A  11      30.307  36.478  26.596  1.00  0.00           C  
ATOM     39  C   LYS A  11      29.090  35.677  26.133  1.00  0.00           C  
ATOM     40  O   LYS A  11      29.300  34.540  25.735  1.00  0.00           O  
ATOM     41  N   THR A  12      27.875  36.200  26.344  1.00  0.00           N  
ATOM     42  CA  THR A  12      26.646  35.619  25.847  1.00  0.00           C  
ATOM     43  C   THR A  12      26.374  36.095  24.420  1.00  0.00           C  
ATOM     44  O   THR A  12      26.139  37.257  24.110  1.00  0.00           O  
ATOM     45  N   ILE A  13      26.478  35.127  23.504  1.00  0.00           N  
ATOM     46  CA  ILE A  13      26.260  35.312  22.086  1.00  0.00           C  
ATOM     47  C   ILE A  13      24.831  34.776  21.917  1.00  0.00           C  
ATOM     48  O   ILE A  13      24.408  33.645  22.168  1.00  0.00           O  
ATOM     49  N   THR A  14      23.998  35.729  21.526  1.00  0.00           N  
ATOM     50  CA  THR A  14      22.588  35.532  21.246  1.00  0.00           C  
ATOM     51  C   THR A  14      22.594  35.222  19.739  1.00  0.00           C  
ATOM     52  O   THR A  14      23.344  35.794  18.958  1.00  0.00           O  
ATOM     53  N   LEU A  15      21.842  34.184  19.394  1.00  0.00           N  
ATOM     54  CA  LEU A  15      21.725  33.527  18.107  1.00  0.00           C  
ATOM     55  C   LEU A  15      20.248  33.371  17.727  1.00  0.00           C  
ATOM     56  O   LEU A  15      19.386  33.393  18.600  1.00  0.00           O  
ATOM     57  N   GLU A  16      20.043  33.277  16.414  1.00  0.00           N  
ATOM     58  CA  GLU A  16      18.798  32.965  15.752  1.00  0.00           C  
ATOM     59  C   GLU A  16      19.073  31.635  15.041  1.00  0.00           C  
ATOM     60  O   GLU A  16      19.996  31.603  14.237  1.00  0.00           O  
ATOM     61  N   VAL A  17      18.252  30.611  15.263  1.00  0.00           N  
ATOM     62  CA  VAL A  17      18.436  29.274  14.722  1.00  0.00           C  
ATOM     63  C   VAL A  17      17.040  28.906  14.214  1.00  0.00           C  
ATOM     64  O   VAL A  17      16.000  29.457  14.567  1.00  0.00           O  
ATOM     65  N   GLU A  18      17.044  27.870  13.377  1.00  0.00           N  
ATOM     66  CA  GLU A  18      15.860  27.218  12.826  1.00  0.00           C  
ATOM     67  C   GLU A  18      15.649  25.937  13.638  1.00  0.00           C  
ATOM     68  O   GLU A  18      16.685  25.441  14.080  1.00  0.00           O  
ATOM     69  N   PRO A  19      14.487  25.369  13.915  1.00  0.00           N  
ATOM     70  CA  PRO A  19      14.395  24.267  14.850  1.00  0.00           C  
ATOM     71  C   PRO A  19      14.855  22.934  14.272  1.00  0.00           C  
ATOM     72  O   PRO A  19      14.713  21.931  14.969  1.00  0.00           O  
ATOM     73  N   SER A  20      15.414  22.897  13.061  1.00  0.00           N  
ATOM     74  CA  SER A  20      15.829  21.685  12.377  1.00  0.00           C  
ATOM     75  C   SER A  20      17.336  21.816  12.185  1.00  0.00           C  
ATOM     76  O   SER A  20      17.859  20.883  11.562  1.00  0.00           O  
ATOM     77  N   ASP A  21      17.994  22.907  12.558  1.00  0.00           N  
ATOM     78  CA  ASP A  21      19.430  23.151  12.548  1.00  0.00           C  
ATOM     79  C   ASP A  21      20.060  21.995  13.340  1.00  0.00           C  
ATOM     80  O   ASP A  21      19.754  21.938  14.522  1.00  0.00           O  
ATOM     81  N   THR A  22      20.971  21.274  12.701  1.00  0.00           N  
ATOM     82  CA  THR A  22      21.844  20.473  13.529  1.00  0.00           C  
ATOM     83  C   THR A  22      22.815  21.232  14.436  1.00  0.00           C  
ATOM     84  O   THR A  22      23.181  22.343  14.068  1.00  0.00           O  
ATOM     85  N   ILE A  23      23.369  20.699  15.525  1.00  0.00           N  
ATOM     86  CA  ILE A  23      24.424  21.405  16.231  1.00  0.00           C  
ATOM     87  C   ILE A  23      25.651  21.717  15.380  1.00  0.00           C  
ATOM     88  O   ILE A  23      26.280  22.757  15.578  1.00  0.00           O  
ATOM     89  N   GLU A  24      25.993  20.845  14.431  1.00  0.00           N  
ATOM     90  CA  GLU A  24      26.915  21.141  13.352  1.00  0.00           C  
ATOM     91  C   GLU A  24      26.712  22.490  12.641  1.00  0.00           C  
ATOM     92  O   GLU A  24      27.671  23.212  12.398  1.00  0.00           O  
ATOM     93  N   ASN A  25      25.475  22.760  12.247  1.00  0.00           N  
ATOM     94  CA  ASN A  25      25.141  23.972  11.521  1.00  0.00           C  
ATOM     95  C   ASN A  25      25.247  25.166  12.471  1.00  0.00           C  
ATOM     96  O   ASN A  25      25.765  26.215  12.091  1.00  0.00           O  
ATOM     97  N   VAL A  26      24.821  25.002  13.720  1.00  0.00           N  
ATOM     98  CA  VAL A  26      25.012  25.896  14.843  1.00  0.00           C  
ATOM     99  C   VAL A  26      26.472  26.301  15.077  1.00  0.00           C  
ATOM    100  O   VAL A  26      26.789  27.458  15.368  1.00  0.00           O  
ATOM    101  N   LYS A  27      27.466  25.432  14.903  1.00  0.00           N  
ATOM    102  CA  LYS A  27      28.854  25.818  14.977  1.00  0.00           C  
ATOM    103  C   LYS A  27      29.346  26.752  13.870  1.00  0.00           C  
ATOM    104  O   LYS A  27      30.240  27.577  14.092  1.00  0.00           O  
ATOM    105  N   ALA A  28      28.751  26.605  12.691  1.00  0.00           N  
ATOM    106  CA  ALA A  28      29.033  27.493  11.580  1.00  0.00           C  
ATOM    107  C   ALA A  28      28.253  28.798  11.716  1.00  0.00           C  
ATOM    108  O   ALA A  28      28.810  29.826  11.341  1.00  0.00           O  
ATOM    109  N   LYS A  29      27.014  28.793  12.210  1.00  0.00           N  
ATOM    110  CA  LYS A  29      26.347  30.028  12.572  1.00  0.00           C  
ATOM    111  C   LYS A  29      27.007  30.804  13.713  1.00  0.00           C  
ATOM    112  O   LYS A  29      26.922  32.025  13.672  1.00  0.00           O  
ATOM    113  N   ILE A  30      27.678  30.117  14.647  1.00  0.00           N  
ATOM    114  CA  ILE A  30      28.570  30.728  15.606  1.00  0.00           C  
ATOM    115  C   ILE A  30      29.811  31.311  14.925  1.00  0.00           C  
ATOM    116  O   ILE A  30      30.072  32.478  15.178  1.00  0.00           O  
ATOM    117  N   GLN A  31      30.479  30.653  13.974  1.00  0.00           N  
ATOM    118  CA  GLN A  31      31.623  31.168  13.252  1.00  0.00           C  
ATOM    119  C   GLN A  31      31.253  32.450  12.501  1.00  0.00           C  
ATOM    120  O   GLN A  31      31.916  33.430  12.825  1.00  0.00           O  
ATOM    121  N   ASP A  32      30.066  32.507  11.913  1.00  0.00           N  
ATOM    122  CA  ASP A  32      29.531  33.683  11.254  1.00  0.00           C  
ATOM    123  C   ASP A  32      29.474  34.920  12.153  1.00  0.00           C  
ATOM    124  O   ASP A  32      29.544  36.036  11.649  1.00  0.00           O  
ATOM    125  N   LYS A  33      29.472  34.848  13.484  1.00  0.00           N  
ATOM    126  CA  LYS A  33      29.407  35.946  14.423  1.00  0.00           C  
ATOM    127  C   LYS A  33      30.779  36.045  15.092  1.00  0.00           C  
ATOM    128  O   LYS A  33      31.254  37.159  15.322  1.00  0.00           O  
ATOM    129  N   GLU A  34      31.323  34.939  15.601  1.00  0.00           N  
ATOM    130  CA  GLU A  34      32.452  34.904  16.504  1.00  0.00           C  
ATOM    131  C   GLU A  34      33.766  34.496  15.830  1.00  0.00           C  
ATOM    132  O   GLU A  34      34.746  34.583  16.563  1.00  0.00           O  
ATOM    133  N   GLY A  35      33.797  34.028  14.589  1.00  0.00           N  
ATOM    134  CA  GLY A  35      35.041  33.890  13.865  1.00  0.00           C  
ATOM    135  C   GLY A  35      35.706  32.530  14.088  1.00  0.00           C  
ATOM    136  O   GLY A  35      36.597  32.159  13.333  1.00  0.00           O  
ATOM    137  N   ILE A  36      35.304  31.814  15.143  1.00  0.00           N  
ATOM    138  CA  ILE A  36      35.949  30.564  15.464  1.00  0.00           C  
ATOM    139  C   ILE A  36      35.409  29.428  14.602  1.00  0.00           C  
ATOM    140  O   ILE A  36      34.208  29.229  14.509  1.00  0.00           O  
ATOM    141  N   PRO A  37      36.228  28.490  14.115  1.00  0.00           N  
ATOM    142  CA  PRO A  37      35.854  27.351  13.294  1.00  0.00           C  
ATOM    143  C   PRO A  37      35.131  26.239  14.032  1.00  0.00           C  
ATOM    144  O   PRO A  37      35.428  26.081  15.218  1.00  0.00           O  
ATOM    145  N   PRO A  38      34.108  25.524  13.561  1.00  0.00           N  
ATOM    146  CA  PRO A  38      33.479  24.379  14.180  1.00  0.00           C  
ATOM    147  C   PRO A  38      34.345  23.328  14.868  1.00  0.00           C  
ATOM    148  O   PRO A  38      33.905  22.701  15.828  1.00  0.00           O  
ATOM    149  N   ASP A  39      35.567  23.112  14.394  1.00  0.00           N  
ATOM    150  CA  ASP A  39      36.576  22.126  14.746  1.00  0.00           C  
ATOM    151  C   ASP A  39      36.972  22.149  16.214  1.00  0.00           C  
ATOM    152  O   ASP A  39      37.009  21.152  16.932  1.00  0.00           O  
ATOM    153  N   GLN A  40      37.387  23.325  16.698  1.00  0.00           N  
ATOM    154  CA  GLN A  40      37.809  23.546  18.066  1.00  0.00           C  
ATOM    155  C   GLN A  40      36.663  23.723  19.064  1.00  0.00           C  
ATOM    156  O   GLN A  40      36.769  23.819  20.285  1.00  0.00           O  
ATOM    157  N   GLN A  41      35.439  23.802  18.543  1.00  0.00           N  
ATOM    158  CA  GLN A  41      34.270  23.968  19.397  1.00  0.00           C  
ATOM    159  C   GLN A  41      33.701  22.611  19.823  1.00  0.00           C  
ATOM    160  O   GLN A  41      33.571  21.688  19.019  1.00  0.00           O  
ATOM    161  N   ARG A  42      33.169  22.538  21.039  1.00  0.00           N  
ATOM    162  CA  ARG A  42      32.117  21.630  21.443  1.00  0.00           C  
ATOM    163  C   ARG A  42      30.954  22.444  22.010  1.00  0.00           C  
ATOM    164  O   ARG A  42      31.173  23.187  22.967  1.00  0.00           O  
ATOM    165  N   LEU A  43      29.711  22.224  21.599  1.00  0.00           N  
ATOM    166  CA  LEU A  43      28.558  22.849  22.220  1.00  0.00           C  
ATOM    167  C   LEU A  43      28.186  21.852  23.322  1.00  0.00           C  
ATOM    168  O   LEU A  43      28.075  20.643  23.147  1.00  0.00           O  
ATOM    169  N   ILE A  44      28.012  22.443  24.504  1.00  0.00           N  
ATOM    170  CA  ILE A  44      27.632  21.748  25.713  1.00  0.00           C  
ATOM    171  C   ILE A  44      26.351  22.245  26.380  1.00  0.00           C  
ATOM    172  O   ILE A  44      26.143  23.450  26.515  1.00  0.00           O  
ATOM    173  N   PHE A  45      25.382  21.354  26.592  1.00  0.00           N  
ATOM    174  CA  PHE A  45      24.044  21.541  27.104  1.00  0.00           C  
ATOM    175  C   PHE A  45      23.522  20.356  27.917  1.00  0.00           C  
ATOM    176  O   PHE A  45      23.918  19.227  27.652  1.00  0.00           O  
ATOM    177  N   ALA A  46      22.743  20.556  28.969  1.00  0.00           N  
ATOM    178  CA  ALA A  46      21.981  19.575  29.711  1.00  0.00           C  
ATOM    179  C   ALA A  46      22.867  18.533  30.402  1.00  0.00           C  
ATOM    180  O   ALA A  46      22.483  17.370  30.496  1.00  0.00           O  
ATOM    181  N   GLY A  47      24.109  18.892  30.680  1.00  0.00           N  
ATOM    182  CA  GLY A  47      25.058  17.969  31.276  1.00  0.00           C  
ATOM    183  C   GLY A  47      25.942  17.227  30.282  1.00  0.00           C  
ATOM    184  O   GLY A  47      26.797  16.434  30.674  1.00  0.00           O  
ATOM    185  N   LYS A  48      25.852  17.350  28.960  1.00  0.00           N  
ATOM    186  CA  LYS A  48      26.514  16.541  27.960  1.00  0.00           C  
ATOM    187  C   LYS A  48      27.138  17.373  26.839  1.00  0.00           C  
ATOM    188  O   LYS A  48      26.678  18.490  26.633  1.00  0.00           O  
ATOM    189  N   GLN A  49      28.144  16.801  26.191  1.00  0.00           N  
ATOM    190  CA  GLN A  49      28.658  17.263  24.919  1.00  0.00           C  
ATOM    191  C   GLN A  49      27.690  16.744  23.859  1.00  0.00           C  
ATOM    192  O   GLN A  49      27.201  15.612  23.830  1.00  0.00           O  
ATOM    193  N   LEU A  50      27.350  17.674  22.974  1.00  0.00           N  
ATOM    194  CA  LEU A  50      26.365  17.475  21.930  1.00  0.00           C  
ATOM    195  C   LEU A  50      26.884  16.728  20.700  1.00  0.00           C  
ATOM    196  O   LEU A  50      27.861  17.157  20.099  1.00  0.00           O  
ATOM    197  N   GLU A  51      26.082  15.789  20.207  1.00  0.00           N  
ATOM    198  CA  GLU A  51      26.431  15.244  18.915  1.00  0.00           C  
ATOM    199  C   GLU A  51      26.060  16.204  17.784  1.00  0.00           C  
ATOM    200  O   GLU A  51      25.117  16.992  17.864  1.00  0.00           O  
ATOM    201  N   ASP A  52      26.910  16.222  16.758  1.00  0.00           N  
ATOM    202  CA  ASP A  52      26.853  17.227  15.715  1.00  0.00           C  
ATOM    203  C   ASP A  52      25.595  17.134  14.858  1.00  0.00           C  
ATOM    204  O   ASP A  52      25.055  18.171  14.472  1.00  0.00           O  
ATOM    205  N   GLY A  53      25.068  15.932  14.634  1.00  0.00           N  
ATOM    206  CA  GLY A  53      24.076  15.603  13.630  1.00  0.00           C  
ATOM    207  C   GLY A  53      22.690  15.462  14.239  1.00  0.00           C  
ATOM    208  O   GLY A  53      21.731  15.155  13.541  1.00  0.00           O  
ATOM    209  N   ARG A  54      22.610  15.552  15.568  1.00  0.00           N  
ATOM    210  CA  ARG A  54      21.422  15.828  16.348  1.00  0.00           C  
ATOM    211  C   ARG A  54      20.950  17.287  16.299  1.00  0.00           C  
ATOM    212  O   ARG A  54      21.736  18.211  16.094  1.00  0.00           O  
ATOM    213  N   THR A  55      19.650  17.531  16.421  1.00  0.00           N  
ATOM    214  CA  THR A  55      18.996  18.812  16.260  1.00  0.00           C  
ATOM    215  C   THR A  55      18.638  19.377  17.632  1.00  0.00           C  
ATOM    216  O   THR A  55      18.520  18.756  18.681  1.00  0.00           O  
ATOM    217  N   LEU A  56      18.449  20.700  17.548  1.00  0.00           N  
ATOM    218  CA  LEU A  56      17.770  21.519  18.526  1.00  0.00           C  
ATOM    219  C   LEU A  56      16.430  20.916  18.943  1.00  0.00           C  
ATOM    220  O   LEU A  56      16.260  20.737  20.153  1.00  0.00           O  
ATOM    221  N   SER A  57      15.682  20.522  17.909  1.00  0.00           N  
ATOM    222  CA  SER A  57      14.522  19.695  18.138  1.00  0.00           C  
ATOM    223  C   SER A  57      14.679  18.326  18.804  1.00  0.00           C  
ATOM    224  O   SER A  57      14.066  18.154  19.849  1.00  0.00           O  
ATOM    225  N   ASP A  58      15.568  17.417  18.406  1.00  0.00           N  
ATOM    226  CA  ASP A  58      15.962  16.245  19.148  1.00  0.00           C  
ATOM    227  C   ASP A  58      16.389  16.336  20.620  1.00  0.00           C  
ATOM    228  O   ASP A  58      15.903  15.570  21.444  1.00  0.00           O  
ATOM    229  N   TYR A  59      17.204  17.334  20.942  1.00  0.00           N  
ATOM    230  CA  TYR A  59      17.541  17.557  22.340  1.00  0.00           C  
ATOM    231  C   TYR A  59      16.663  18.558  23.082  1.00  0.00           C  
ATOM    232  O   TYR A  59      16.800  18.683  24.296  1.00  0.00           O  
ATOM    233  N   ASN A  60      15.638  19.162  22.479  1.00  0.00           N  
ATOM    234  CA  ASN A  60      14.614  19.945  23.144  1.00  0.00           C  
ATOM    235  C   ASN A  60      15.305  21.255  23.528  1.00  0.00           C  
ATOM    236  O   ASN A  60      15.361  21.642  24.700  1.00  0.00           O  
ATOM    237  N   ILE A  61      15.982  21.927  22.608  1.00  0.00           N  
ATOM    238  CA  ILE A  61      16.710  23.156  22.846  1.00  0.00           C  
ATOM    239  C   ILE A  61      15.897  24.236  22.144  1.00  0.00           C  
ATOM    240  O   ILE A  61      16.203  24.564  21.000  1.00  0.00           O  
ATOM    241  N   GLN A  62      14.718  24.521  22.684  1.00  0.00           N  
ATOM    242  CA  GLN A  62      13.572  24.947  21.897  1.00  0.00           C  
ATOM    243  C   GLN A  62      13.009  26.251  22.482  1.00  0.00           C  
ATOM    244  O   GLN A  62      12.032  26.183  23.220  1.00  0.00           O  
ATOM    245  N   LYS A  63      13.739  27.347  22.269  1.00  0.00           N  
ATOM    246  CA  LYS A  63      13.268  28.678  22.603  1.00  0.00           C  
ATOM    247  C   LYS A  63      13.624  29.080  24.043  1.00  0.00           C  
ATOM    248  O   LYS A  63      12.797  28.991  24.951  1.00  0.00           O  
ATOM    249  N   GLU A  64      14.799  29.700  24.080  1.00  0.00           N  
ATOM    250  CA  GLU A  64      15.219  30.589  25.150  1.00  0.00           C  
ATOM    251  C   GLU A  64      15.862  29.795  26.293  1.00  0.00           C  
ATOM    252  O   GLU A  64      15.451  29.860  27.451  1.00  0.00           O  
ATOM    253  N   SER A  65      16.769  28.896  25.917  1.00  0.00           N  
ATOM    254  CA  SER A  65      17.622  28.156  26.832  1.00  0.00           C  
ATOM    255  C   SER A  65      19.083  28.528  26.553  1.00  0.00           C  
ATOM    256  O   SER A  65      19.439  29.095  25.524  1.00  0.00           O  
ATOM    257  N   THR A  66      19.947  28.299  27.536  1.00  0.00           N  
ATOM    258  CA  THR A  66      21.338  28.724  27.510  1.00  0.00           C  
ATOM    259  C   THR A  66      22.234  27.496  27.337  1.00  0.00           C  
ATOM    260  O   THR A  66      22.166  26.462  28.002  1.00  0.00           O  
ATOM    261  N   LEU A  67      23.220  27.723  26.467  1.00  0.00           N  
ATOM    262  CA  LEU A  67      24.157  26.723  25.995  1.00  0.00           C  
ATOM    263  C   LEU A  67      25.541  27.111  26.522  1.00  0.00           C  
ATOM    264  O   LEU A  67      25.818  28.307  26.565  1.00  0.00           O  
ATOM    265  N   HIS A  68      26.425  26.198  26.909  1.00  0.00           N  
ATOM    266  CA  HIS A  68      27.841  26.324  27.210  1.00  0.00           C  
ATOM    267  C   HIS A  68      28.609  26.072  25.915  1.00  0.00           C  
ATOM    268  O   HIS A  68      28.149  25.206  25.182  1.00  0.00           O  
ATOM    269  N   LEU A  69      29.648  26.801  25.511  1.00  0.00           N  
ATOM    270  CA  LEU A  69      30.548  26.658  24.382  1.00  0.00           C  
ATOM    271  C   LEU A  69      31.969  26.536  24.939  1.00  0.00           C  
ATOM    272  O   LEU A  69      32.416  27.502  25.548  1.00  0.00           O  
ATOM    273  N   VAL A  70      32.689  25.432  24.824  1.00  0.00           N  
ATOM    274  CA  VAL A  70      33.961  25.103  25.424  1.00  0.00           C  
ATOM    275  C   VAL A  70      34.909  24.918  24.231  1.00  0.00           C  
ATOM    276  O   VAL A  70      34.566  24.407  23.166  1.00  0.00           O  
TER
ENDMDL
MODEL      17
ATOM      1  N   GLN A   2      15.208  32.046  18.949  1.00  0.00           N  
ATOM      2  CA  GLN A   2      16.570  32.314  19.372  1.00  0.00           C  
ATOM      3  C   GLN A   2      17.024  31.228  20.360  1.00  0.00           C  
ATOM      4  O   GLN A   2      16.152  30.730  21.066  1.00  0.00           O  
ATOM      5  N   ILE A   3      18.310  31.065  20.668  1.00  0.00           N  
ATOM      6  CA  ILE A   3      19.027  30.315  21.670  1.00  0.00           C  
ATOM      7  C   ILE A   3      20.259  31.147  22.060  1.00  0.00           C  
ATOM      8  O   ILE A   3      20.674  32.138  21.463  1.00  0.00           O  
ATOM      9  N   PHE A   4      20.866  30.771  23.182  1.00  0.00           N  
ATOM     10  CA  PHE A   4      22.086  31.341  23.701  1.00  0.00           C  
ATOM     11  C   PHE A   4      23.221  30.315  23.739  1.00  0.00           C  
ATOM     12  O   PHE A   4      23.014  29.165  24.125  1.00  0.00           O  
ATOM     13  N   VAL A   5      24.477  30.698  23.542  1.00  0.00           N  
ATOM     14  CA  VAL A   5      25.603  29.810  23.801  1.00  0.00           C  
ATOM     15  C   VAL A   5      26.586  30.595  24.675  1.00  0.00           C  
ATOM     16  O   VAL A   5      27.037  31.608  24.119  1.00  0.00           O  
ATOM     17  N   LYS A   6      26.813  30.214  25.921  1.00  0.00           N  
ATOM     18  CA  LYS A   6      27.670  30.900  26.875  1.00  0.00           C  
ATOM     19  C   LYS A   6      29.113  30.405  26.738  1.00  0.00           C  
ATOM     20  O   LYS A   6      29.271  29.204  26.588  1.00  0.00           O  
ATOM     21  N   THR A   7      30.075  31.309  26.910  1.00  0.00           N  
ATOM     22  CA  THR A   7      31.450  30.981  26.612  1.00  0.00           C  
ATOM     23  C   THR A   7      32.285  31.065  27.894  1.00  0.00           C  
ATOM     24  O   THR A   7      31.924  31.785  28.820  1.00  0.00           O  
ATOM     25  N   LEU A   8      33.459  30.439  28.038  1.00  0.00           N  
ATOM     26  CA  LEU A   8      34.329  30.327  29.194  1.00  0.00           C  
ATOM     27  C   LEU A   8      34.691  31.627  29.920  1.00  0.00           C  
ATOM     28  O   LEU A   8      34.643  31.765  31.140  1.00  0.00           O  
ATOM     29  N   THR A   9      35.137  32.591  29.124  1.00  0.00           N  
ATOM     30  CA  THR A   9      35.747  33.840  29.566  1.00  0.00           C  
ATOM     31  C   THR A   9      35.178  34.946  28.684  1.00  0.00           C  
ATOM     32  O   THR A   9      35.898  35.792  28.163  1.00  0.00           O  
ATOM     33  N   GLY A  10      33.913  34.768  28.310  1.00  0.00           N  
ATOM     34  CA  GLY A  10      33.234  35.613  27.340  1.00  0.00           C  
ATOM     35  C   GLY A  10      31.852  36.134  27.750  1.00  0.00           C  
ATOM     36  O   GLY A  10      31.679  36.815  28.763  1.00  0.00           O  
ATOM     37  N   LYS A  11      30.879  35.829  26.896  1.00  0.00           N  
ATOM     38  CA  LYS A  11      29.547  36.392  26.867  1.00  0.00           C  
ATOM     39  C   LYS A  11      28.497  35.314  26.602  1.00  0.00           C  
ATOM     40  O   LYS A  11      28.858  34.145  26.620  1.00  0.00           O  
ATOM     41  N   THR A  12      27.250  35.683  26.300  1.00  0.00           N  
ATOM     42  CA  THR A  12      26.367  34.894  25.447  1.00  0.00           C  
ATOM     43  C   THR A  12      26.526  35.293  23.980  1.00  0.00           C  
ATOM     44  O   THR A  12      26.277  36.446  23.631  1.00  0.00           O  
ATOM     45  N   ILE A  13      26.920  34.339  23.139  1.00  0.00           N  
ATOM     46  CA  ILE A  13      26.848  34.539  21.707  1.00  0.00           C  
ATOM     47  C   ILE A  13      25.383  34.261  21.369  1.00  0.00           C  
ATOM     48  O   ILE A  13      24.770  33.433  22.040  1.00  0.00           O  
ATOM     49  N   THR A  14      24.783  34.983  20.428  1.00  0.00           N  
ATOM     50  CA  THR A  14      23.363  35.010  20.135  1.00  0.00           C  
ATOM     51  C   THR A  14      23.153  34.433  18.738  1.00  0.00           C  
ATOM     52  O   THR A  14      23.812  34.990  17.865  1.00  0.00           O  
ATOM     53  N   LEU A  15      22.371  33.384  18.514  1.00  0.00           N  
ATOM     54  CA  LEU A  15      22.054  32.889  17.192  1.00  0.00           C  
ATOM     55  C   LEU A  15      20.521  32.782  17.167  1.00  0.00           C  
ATOM     56  O   LEU A  15      19.920  32.157  18.036  1.00  0.00           O  
ATOM     57  N   GLU A  16      19.948  33.273  16.075  1.00  0.00           N  
ATOM     58  CA  GLU A  16      18.552  33.158  15.742  1.00  0.00           C  
ATOM     59  C   GLU A  16      18.626  32.066  14.668  1.00  0.00           C  
ATOM     60  O   GLU A  16      19.333  32.233  13.669  1.00  0.00           O  
ATOM     61  N   VAL A  17      17.968  30.949  14.932  1.00  0.00           N  
ATOM     62  CA  VAL A  17      18.024  29.655  14.279  1.00  0.00           C  
ATOM     63  C   VAL A  17      16.582  29.213  14.009  1.00  0.00           C  
ATOM     64  O   VAL A  17      15.587  29.597  14.619  1.00  0.00           O  
ATOM     65  N   GLU A  18      16.441  28.448  12.929  1.00  0.00           N  
ATOM     66  CA  GLU A  18      15.176  27.875  12.524  1.00  0.00           C  
ATOM     67  C   GLU A  18      14.902  26.730  13.501  1.00  0.00           C  
ATOM     68  O   GLU A  18      15.856  26.007  13.777  1.00  0.00           O  
ATOM     69  N   PRO A  19      13.695  26.528  14.026  1.00  0.00           N  
ATOM     70  CA  PRO A  19      13.502  25.486  15.004  1.00  0.00           C  
ATOM     71  C   PRO A  19      13.770  24.050  14.519  1.00  0.00           C  
ATOM     72  O   PRO A  19      13.743  23.176  15.388  1.00  0.00           O  
ATOM     73  N   SER A  20      14.049  23.811  13.241  1.00  0.00           N  
ATOM     74  CA  SER A  20      14.515  22.564  12.668  1.00  0.00           C  
ATOM     75  C   SER A  20      15.901  22.473  12.039  1.00  0.00           C  
ATOM     76  O   SER A  20      16.093  21.507  11.305  1.00  0.00           O  
ATOM     77  N   ASP A  21      16.808  23.359  12.441  1.00  0.00           N  
ATOM     78  CA  ASP A  21      18.210  23.373  12.063  1.00  0.00           C  
ATOM     79  C   ASP A  21      19.109  22.424  12.844  1.00  0.00           C  
ATOM     80  O   ASP A  21      18.732  21.963  13.922  1.00  0.00           O  
ATOM     81  N   THR A  22      20.283  22.111  12.299  1.00  0.00           N  
ATOM     82  CA  THR A  22      21.212  21.040  12.573  1.00  0.00           C  
ATOM     83  C   THR A  22      22.365  21.637  13.402  1.00  0.00           C  
ATOM     84  O   THR A  22      22.857  22.707  13.067  1.00  0.00           O  
ATOM     85  N   ILE A  23      22.884  20.919  14.401  1.00  0.00           N  
ATOM     86  CA  ILE A  23      23.962  21.334  15.269  1.00  0.00           C  
ATOM     87  C   ILE A  23      25.160  21.909  14.503  1.00  0.00           C  
ATOM     88  O   ILE A  23      25.602  22.995  14.837  1.00  0.00           O  
ATOM     89  N   GLU A  24      25.656  21.285  13.443  1.00  0.00           N  
ATOM     90  CA  GLU A  24      26.856  21.690  12.740  1.00  0.00           C  
ATOM     91  C   GLU A  24      26.690  23.046  12.058  1.00  0.00           C  
ATOM     92  O   GLU A  24      27.579  23.907  12.024  1.00  0.00           O  
ATOM     93  N   ASN A  25      25.499  23.266  11.505  1.00  0.00           N  
ATOM     94  CA  ASN A  25      25.094  24.422  10.736  1.00  0.00           C  
ATOM     95  C   ASN A  25      24.917  25.641  11.641  1.00  0.00           C  
ATOM     96  O   ASN A  25      24.873  26.788  11.216  1.00  0.00           O  
ATOM     97  N   VAL A  26      24.893  25.410  12.954  1.00  0.00           N  
ATOM     98  CA  VAL A  26      24.811  26.501  13.906  1.00  0.00           C  
ATOM     99  C   VAL A  26      26.241  26.741  14.410  1.00  0.00           C  
ATOM    100  O   VAL A  26      26.423  27.930  14.643  1.00  0.00           O  
ATOM    101  N   LYS A  27      27.129  25.755  14.425  1.00  0.00           N  
ATOM    102  CA  LYS A  27      28.532  26.032  14.683  1.00  0.00           C  
ATOM    103  C   LYS A  27      29.058  27.052  13.667  1.00  0.00           C  
ATOM    104  O   LYS A  27      29.909  27.832  14.085  1.00  0.00           O  
ATOM    105  N   ALA A  28      28.719  26.926  12.385  1.00  0.00           N  
ATOM    106  CA  ALA A  28      28.978  27.787  11.251  1.00  0.00           C  
ATOM    107  C   ALA A  28      28.460  29.214  11.482  1.00  0.00           C  
ATOM    108  O   ALA A  28      29.171  30.196  11.307  1.00  0.00           O  
ATOM    109  N   LYS A  29      27.266  29.318  12.048  1.00  0.00           N  
ATOM    110  CA  LYS A  29      26.729  30.573  12.552  1.00  0.00           C  
ATOM    111  C   LYS A  29      27.439  31.259  13.724  1.00  0.00           C  
ATOM    112  O   LYS A  29      27.471  32.482  13.810  1.00  0.00           O  
ATOM    113  N   ILE A  30      27.959  30.431  14.623  1.00  0.00           N  
ATOM    114  CA  ILE A  30      28.793  30.904  15.712  1.00  0.00           C  
ATOM    115  C   ILE A  30      30.162  31.309  15.137  1.00  0.00           C  
ATOM    116  O   ILE A  30      30.746  32.284  15.599  1.00  0.00           O  
ATOM    117  N   GLN A  31      30.675  30.759  14.044  1.00  0.00           N  
ATOM    118  CA  GLN A  31      31.803  31.235  13.285  1.00  0.00           C  
ATOM    119  C   GLN A  31      31.567  32.559  12.550  1.00  0.00           C  
ATOM    120  O   GLN A  31      32.253  33.521  12.898  1.00  0.00           O  
ATOM    121  N   ASP A  32      30.513  32.703  11.750  1.00  0.00           N  
ATOM    122  CA  ASP A  32      30.143  33.924  11.058  1.00  0.00           C  
ATOM    123  C   ASP A  32      29.917  35.170  11.918  1.00  0.00           C  
ATOM    124  O   ASP A  32      30.336  36.247  11.506  1.00  0.00           O  
ATOM    125  N   LYS A  33      29.470  35.055  13.164  1.00  0.00           N  
ATOM    126  CA  LYS A  33      29.117  36.222  13.949  1.00  0.00           C  
ATOM    127  C   LYS A  33      30.204  36.607  14.953  1.00  0.00           C  
ATOM    128  O   LYS A  33      30.424  37.794  15.168  1.00  0.00           O  
ATOM    129  N   GLU A  34      30.905  35.601  15.475  1.00  0.00           N  
ATOM    130  CA  GLU A  34      31.879  35.797  16.528  1.00  0.00           C  
ATOM    131  C   GLU A  34      33.280  35.257  16.220  1.00  0.00           C  
ATOM    132  O   GLU A  34      34.246  35.698  16.830  1.00  0.00           O  
ATOM    133  N   GLY A  35      33.511  34.348  15.274  1.00  0.00           N  
ATOM    134  CA  GLY A  35      34.818  33.960  14.812  1.00  0.00           C  
ATOM    135  C   GLY A  35      35.344  32.632  15.351  1.00  0.00           C  
ATOM    136  O   GLY A  35      36.511  32.296  15.099  1.00  0.00           O  
ATOM    137  N   ILE A  36      34.626  31.849  16.152  1.00  0.00           N  
ATOM    138  CA  ILE A  36      35.060  30.568  16.663  1.00  0.00           C  
ATOM    139  C   ILE A  36      34.925  29.494  15.570  1.00  0.00           C  
ATOM    140  O   ILE A  36      33.776  29.273  15.198  1.00  0.00           O  
ATOM    141  N   PRO A  37      35.962  28.793  15.135  1.00  0.00           N  
ATOM    142  CA  PRO A  37      35.710  27.655  14.281  1.00  0.00           C  
ATOM    143  C   PRO A  37      34.961  26.467  14.873  1.00  0.00           C  
ATOM    144  O   PRO A  37      34.892  26.279  16.087  1.00  0.00           O  
ATOM    145  N   PRO A  38      34.354  25.615  14.050  1.00  0.00           N  
ATOM    146  CA  PRO A  38      33.442  24.580  14.471  1.00  0.00           C  
ATOM    147  C   PRO A  38      34.118  23.334  15.050  1.00  0.00           C  
ATOM    148  O   PRO A  38      33.562  22.744  15.966  1.00  0.00           O  
ATOM    149  N   ASP A  39      35.405  23.148  14.742  1.00  0.00           N  
ATOM    150  CA  ASP A  39      36.151  22.065  15.336  1.00  0.00           C  
ATOM    151  C   ASP A  39      36.727  22.300  16.738  1.00  0.00           C  
ATOM    152  O   ASP A  39      37.041  21.345  17.450  1.00  0.00           O  
ATOM    153  N   GLN A  40      36.694  23.562  17.153  1.00  0.00           N  
ATOM    154  CA  GLN A  40      37.028  23.929  18.508  1.00  0.00           C  
ATOM    155  C   GLN A  40      35.875  23.585  19.462  1.00  0.00           C  
ATOM    156  O   GLN A  40      36.122  23.245  20.616  1.00  0.00           O  
ATOM    157  N   GLN A  41      34.699  23.915  18.943  1.00  0.00           N  
ATOM    158  CA  GLN A  41      33.489  24.193  19.696  1.00  0.00           C  
ATOM    159  C   GLN A  41      32.932  22.860  20.202  1.00  0.00           C  
ATOM    160  O   GLN A  41      32.487  22.050  19.391  1.00  0.00           O  
ATOM    161  N   ARG A  42      33.034  22.722  21.517  1.00  0.00           N  
ATOM    162  CA  ARG A  42      32.473  21.613  22.264  1.00  0.00           C  
ATOM    163  C   ARG A  42      31.325  22.317  22.981  1.00  0.00           C  
ATOM    164  O   ARG A  42      31.562  23.162  23.843  1.00  0.00           O  
ATOM    165  N   LEU A  43      30.109  21.954  22.590  1.00  0.00           N  
ATOM    166  CA  LEU A  43      28.882  22.540  23.091  1.00  0.00           C  
ATOM    167  C   LEU A  43      28.331  21.590  24.156  1.00  0.00           C  
ATOM    168  O   LEU A  43      28.155  20.394  23.943  1.00  0.00           O  
ATOM    169  N   ILE A  44      28.084  22.040  25.379  1.00  0.00           N  
ATOM    170  CA  ILE A  44      27.646  21.291  26.538  1.00  0.00           C  
ATOM    171  C   ILE A  44      26.406  21.875  27.197  1.00  0.00           C  
ATOM    172  O   ILE A  44      26.170  23.081  27.251  1.00  0.00           O  
ATOM    173  N   PHE A  45      25.513  20.965  27.558  1.00  0.00           N  
ATOM    174  CA  PHE A  45      24.134  21.245  27.925  1.00  0.00           C  
ATOM    175  C   PHE A  45      23.665  20.209  28.941  1.00  0.00           C  
ATOM    176  O   PHE A  45      23.464  19.039  28.607  1.00  0.00           O  
ATOM    177  N   ALA A  46      23.491  20.577  30.211  1.00  0.00           N  
ATOM    178  CA  ALA A  46      22.794  19.890  31.274  1.00  0.00           C  
ATOM    179  C   ALA A  46      23.469  18.607  31.774  1.00  0.00           C  
ATOM    180  O   ALA A  46      22.914  17.601  32.217  1.00  0.00           O  
ATOM    181  N   GLY A  47      24.772  18.565  31.538  1.00  0.00           N  
ATOM    182  CA  GLY A  47      25.857  17.648  31.820  1.00  0.00           C  
ATOM    183  C   GLY A  47      26.263  16.854  30.575  1.00  0.00           C  
ATOM    184  O   GLY A  47      27.277  16.164  30.524  1.00  0.00           O  
ATOM    185  N   LYS A  48      25.368  16.838  29.585  1.00  0.00           N  
ATOM    186  CA  LYS A  48      25.364  16.175  28.299  1.00  0.00           C  
ATOM    187  C   LYS A  48      26.210  17.011  27.339  1.00  0.00           C  
ATOM    188  O   LYS A  48      25.938  18.185  27.085  1.00  0.00           O  
ATOM    189  N   GLN A  49      27.261  16.389  26.818  1.00  0.00           N  
ATOM    190  CA  GLN A  49      27.977  16.760  25.616  1.00  0.00           C  
ATOM    191  C   GLN A  49      27.227  16.468  24.310  1.00  0.00           C  
ATOM    192  O   GLN A  49      26.758  15.341  24.214  1.00  0.00           O  
ATOM    193  N   LEU A  50      27.127  17.398  23.369  1.00  0.00           N  
ATOM    194  CA  LEU A  50      26.148  17.263  22.310  1.00  0.00           C  
ATOM    195  C   LEU A  50      26.916  16.990  21.013  1.00  0.00           C  
ATOM    196  O   LEU A  50      27.953  17.554  20.654  1.00  0.00           O  
ATOM    197  N   GLU A  51      26.385  15.971  20.339  1.00  0.00           N  
ATOM    198  CA  GLU A  51      27.013  15.333  19.201  1.00  0.00           C  
ATOM    199  C   GLU A  51      26.364  15.705  17.861  1.00  0.00           C  
ATOM    200  O   GLU A  51      25.152  15.873  17.814  1.00  0.00           O  
ATOM    201  N   ASP A  52      27.252  16.196  16.998  1.00  0.00           N  
ATOM    202  CA  ASP A  52      26.965  16.785  15.708  1.00  0.00           C  
ATOM    203  C   ASP A  52      26.290  15.764  14.787  1.00  0.00           C  
ATOM    204  O   ASP A  52      26.660  14.593  14.886  1.00  0.00           O  
ATOM    205  N   GLY A  53      25.299  16.152  14.005  1.00  0.00           N  
ATOM    206  CA  GLY A  53      24.632  15.267  13.075  1.00  0.00           C  
ATOM    207  C   GLY A  53      23.147  15.445  13.386  1.00  0.00           C  
ATOM    208  O   GLY A  53      22.388  15.454  12.415  1.00  0.00           O  
ATOM    209  N   ARG A  54      22.723  15.594  14.634  1.00  0.00           N  
ATOM    210  CA  ARG A  54      21.346  15.674  15.078  1.00  0.00           C  
ATOM    211  C   ARG A  54      21.053  17.176  15.137  1.00  0.00           C  
ATOM    212  O   ARG A  54      21.832  18.034  14.736  1.00  0.00           O  
ATOM    213  N   THR A  55      19.819  17.445  15.567  1.00  0.00           N  
ATOM    214  CA  THR A  55      19.176  18.734  15.461  1.00  0.00           C  
ATOM    215  C   THR A  55      18.845  19.207  16.875  1.00  0.00           C  
ATOM    216  O   THR A  55      19.129  18.545  17.877  1.00  0.00           O  
ATOM    217  N   LEU A  56      18.163  20.355  16.950  1.00  0.00           N  
ATOM    218  CA  LEU A  56      17.811  21.037  18.178  1.00  0.00           C  
ATOM    219  C   LEU A  56      16.854  20.253  19.082  1.00  0.00           C  
ATOM    220  O   LEU A  56      17.106  20.123  20.281  1.00  0.00           O  
ATOM    221  N   SER A  57      15.834  19.606  18.530  1.00  0.00           N  
ATOM    222  CA  SER A  57      14.690  18.940  19.130  1.00  0.00           C  
ATOM    223  C   SER A  57      15.194  17.656  19.791  1.00  0.00           C  
ATOM    224  O   SER A  57      14.727  17.433  20.900  1.00  0.00           O  
ATOM    225  N   ASP A  58      16.207  16.936  19.323  1.00  0.00           N  
ATOM    226  CA  ASP A  58      16.715  15.635  19.727  1.00  0.00           C  
ATOM    227  C   ASP A  58      17.430  15.674  21.083  1.00  0.00           C  
ATOM    228  O   ASP A  58      17.746  14.673  21.718  1.00  0.00           O  
ATOM    229  N   TYR A  59      17.695  16.917  21.487  1.00  0.00           N  
ATOM    230  CA  TYR A  59      18.256  17.345  22.754  1.00  0.00           C  
ATOM    231  C   TYR A  59      17.410  18.440  23.398  1.00  0.00           C  
ATOM    232  O   TYR A  59      17.808  18.906  24.469  1.00  0.00           O  
ATOM    233  N   ASN A  60      16.299  18.874  22.811  1.00  0.00           N  
ATOM    234  CA  ASN A  60      15.295  19.786  23.326  1.00  0.00           C  
ATOM    235  C   ASN A  60      15.934  21.121  23.709  1.00  0.00           C  
ATOM    236  O   ASN A  60      15.822  21.577  24.841  1.00  0.00           O  
ATOM    237  N   ILE A  61      16.640  21.682  22.732  1.00  0.00           N  
ATOM    238  CA  ILE A  61      17.168  23.029  22.674  1.00  0.00           C  
ATOM    239  C   ILE A  61      16.022  23.744  21.956  1.00  0.00           C  
ATOM    240  O   ILE A  61      15.678  23.432  20.823  1.00  0.00           O  
ATOM    241  N   GLN A  62      15.414  24.611  22.752  1.00  0.00           N  
ATOM    242  CA  GLN A  62      14.141  25.243  22.464  1.00  0.00           C  
ATOM    243  C   GLN A  62      14.313  26.749  22.700  1.00  0.00           C  
ATOM    244  O   GLN A  62      15.360  27.171  23.192  1.00  0.00           O  
ATOM    245  N   LYS A  63      13.364  27.603  22.355  1.00  0.00           N  
ATOM    246  CA  LYS A  63      13.400  29.057  22.328  1.00  0.00           C  
ATOM    247  C   LYS A  63      13.933  29.646  23.633  1.00  0.00           C  
ATOM    248  O   LYS A  63      13.389  29.558  24.731  1.00  0.00           O  
ATOM    249  N   GLU A  64      15.096  30.283  23.558  1.00  0.00           N  
ATOM    250  CA  GLU A  64      15.837  30.828  24.679  1.00  0.00           C  
ATOM    251  C   GLU A  64      16.441  29.832  25.674  1.00  0.00           C  
ATOM    252  O   GLU A  64      16.614  30.115  26.858  1.00  0.00           O  
ATOM    253  N   SER A  65      16.725  28.593  25.274  1.00  0.00           N  
ATOM    254  CA  SER A  65      17.704  27.748  25.921  1.00  0.00           C  
ATOM    255  C   SER A  65      19.165  28.194  25.887  1.00  0.00           C  
ATOM    256  O   SER A  65      19.646  28.462  24.790  1.00  0.00           O  
ATOM    257  N   THR A  66      19.864  28.109  27.015  1.00  0.00           N  
ATOM    258  CA  THR A  66      21.269  28.467  27.098  1.00  0.00           C  
ATOM    259  C   THR A  66      22.081  27.197  27.309  1.00  0.00           C  
ATOM    260  O   THR A  66      21.732  26.353  28.141  1.00  0.00           O  
ATOM    261  N   LEU A  67      23.087  27.016  26.464  1.00  0.00           N  
ATOM    262  CA  LEU A  67      24.091  25.961  26.544  1.00  0.00           C  
ATOM    263  C   LEU A  67      25.365  26.711  26.936  1.00  0.00           C  
ATOM    264  O   LEU A  67      25.457  27.939  26.884  1.00  0.00           O  
ATOM    265  N   HIS A  68      26.376  25.926  27.300  1.00  0.00           N  
ATOM    266  CA  HIS A  68      27.718  26.272  27.718  1.00  0.00           C  
ATOM    267  C   HIS A  68      28.684  25.784  26.632  1.00  0.00           C  
ATOM    268  O   HIS A  68      28.406  24.770  26.006  1.00  0.00           O  
ATOM    269  N   LEU A  69      29.693  26.558  26.274  1.00  0.00           N  
ATOM    270  CA  LEU A  69      30.630  26.292  25.197  1.00  0.00           C  
ATOM    271  C   LEU A  69      32.046  26.387  25.764  1.00  0.00           C  
ATOM    272  O   LEU A  69      32.445  27.452  26.244  1.00  0.00           O  
ATOM    273  N   VAL A  70      32.742  25.260  25.766  1.00  0.00           N  
ATOM    274  CA  VAL A  70      34.129  25.119  26.163  1.00  0.00           C  
ATOM    275  C   VAL A  70      34.845  24.933  24.825  1.00  0.00           C  
ATOM    276  O   VAL A  70      34.321  24.283  23.928  1.00  0.00           O  
TER
ENDMDL
MODEL      18
ATOM      1  N   GLN A   2      15.162  32.091  18.994  1.00  0.00           N  
ATOM      2  CA  GLN A   2      16.260  32.703  19.717  1.00  0.00           C  
ATOM      3  C   GLN A   2      16.737  31.801  20.852  1.00  0.00           C  
ATOM      4  O   GLN A   2      15.863  31.313  21.574  1.00  0.00           O  
ATOM      5  N   ILE A   3      18.037  31.565  20.935  1.00  0.00           N  
ATOM      6  CA  ILE A   3      18.865  30.820  21.868  1.00  0.00           C  
ATOM      7  C   ILE A   3      20.106  31.587  22.322  1.00  0.00           C  
ATOM      8  O   ILE A   3      20.706  32.327  21.556  1.00  0.00           O  
ATOM      9  N   PHE A   4      20.489  31.490  23.590  1.00  0.00           N  
ATOM     10  CA  PHE A   4      21.722  31.976  24.168  1.00  0.00           C  
ATOM     11  C   PHE A   4      22.814  30.904  24.188  1.00  0.00           C  
ATOM     12  O   PHE A   4      22.665  29.733  24.516  1.00  0.00           O  
ATOM     13  N   VAL A   5      24.057  31.388  24.070  1.00  0.00           N  
ATOM     14  CA  VAL A   5      25.290  30.653  24.238  1.00  0.00           C  
ATOM     15  C   VAL A   5      26.202  31.575  25.037  1.00  0.00           C  
ATOM     16  O   VAL A   5      26.522  32.695  24.666  1.00  0.00           O  
ATOM     17  N   LYS A   6      26.713  31.029  26.138  1.00  0.00           N  
ATOM     18  CA  LYS A   6      27.735  31.659  26.952  1.00  0.00           C  
ATOM     19  C   LYS A   6      29.175  31.377  26.508  1.00  0.00           C  
ATOM     20  O   LYS A   6      29.541  30.205  26.597  1.00  0.00           O  
ATOM     21  N   THR A   7      29.922  32.368  26.011  1.00  0.00           N  
ATOM     22  CA  THR A   7      31.317  32.169  25.667  1.00  0.00           C  
ATOM     23  C   THR A   7      32.183  31.801  26.871  1.00  0.00           C  
ATOM     24  O   THR A   7      31.807  32.136  27.995  1.00  0.00           O  
ATOM     25  N   LEU A   8      33.312  31.131  26.661  1.00  0.00           N  
ATOM     26  CA  LEU A   8      34.264  30.651  27.642  1.00  0.00           C  
ATOM     27  C   LEU A   8      34.873  31.806  28.433  1.00  0.00           C  
ATOM     28  O   LEU A   8      35.098  31.625  29.626  1.00  0.00           O  
ATOM     29  N   THR A   9      35.127  32.967  27.824  1.00  0.00           N  
ATOM     30  CA  THR A   9      35.616  34.137  28.523  1.00  0.00           C  
ATOM     31  C   THR A   9      34.493  35.062  28.978  1.00  0.00           C  
ATOM     32  O   THR A   9      34.737  36.022  29.705  1.00  0.00           O  
ATOM     33  N   GLY A  10      33.221  34.764  28.726  1.00  0.00           N  
ATOM     34  CA  GLY A  10      32.101  35.005  29.607  1.00  0.00           C  
ATOM     35  C   GLY A  10      31.076  36.022  29.128  1.00  0.00           C  
ATOM     36  O   GLY A  10      30.319  36.502  29.968  1.00  0.00           O  
ATOM     37  N   LYS A  11      30.965  36.352  27.847  1.00  0.00           N  
ATOM     38  CA  LYS A  11      30.045  37.138  27.048  1.00  0.00           C  
ATOM     39  C   LYS A  11      28.872  36.219  26.667  1.00  0.00           C  
ATOM     40  O   LYS A  11      29.151  35.048  26.420  1.00  0.00           O  
ATOM     41  N   THR A  12      27.672  36.733  26.431  1.00  0.00           N  
ATOM     42  CA  THR A  12      26.547  35.930  25.985  1.00  0.00           C  
ATOM     43  C   THR A  12      26.227  36.362  24.551  1.00  0.00           C  
ATOM     44  O   THR A  12      26.244  37.546  24.221  1.00  0.00           O  
ATOM     45  N   ILE A  13      25.955  35.444  23.627  1.00  0.00           N  
ATOM     46  CA  ILE A  13      25.568  35.686  22.247  1.00  0.00           C  
ATOM     47  C   ILE A  13      24.139  35.139  22.180  1.00  0.00           C  
ATOM     48  O   ILE A  13      23.860  34.013  22.571  1.00  0.00           O  
ATOM     49  N   THR A  14      23.211  35.915  21.622  1.00  0.00           N  
ATOM     50  CA  THR A  14      21.928  35.354  21.264  1.00  0.00           C  
ATOM     51  C   THR A  14      22.074  34.876  19.814  1.00  0.00           C  
ATOM     52  O   THR A  14      22.491  35.652  18.967  1.00  0.00           O  
ATOM     53  N   LEU A  15      21.688  33.643  19.482  1.00  0.00           N  
ATOM     54  CA  LEU A  15      21.911  32.991  18.203  1.00  0.00           C  
ATOM     55  C   LEU A  15      20.504  32.743  17.650  1.00  0.00           C  
ATOM     56  O   LEU A  15      19.614  32.238  18.329  1.00  0.00           O  
ATOM     57  N   GLU A  16      20.362  33.009  16.360  1.00  0.00           N  
ATOM     58  CA  GLU A  16      19.094  32.731  15.707  1.00  0.00           C  
ATOM     59  C   GLU A  16      19.257  31.334  15.105  1.00  0.00           C  
ATOM     60  O   GLU A  16      20.326  31.064  14.562  1.00  0.00           O  
ATOM     61  N   VAL A  17      18.179  30.562  15.109  1.00  0.00           N  
ATOM     62  CA  VAL A  17      18.079  29.193  14.646  1.00  0.00           C  
ATOM     63  C   VAL A  17      16.602  28.931  14.362  1.00  0.00           C  
ATOM     64  O   VAL A  17      15.794  29.803  14.697  1.00  0.00           O  
ATOM     65  N   GLU A  18      16.319  27.698  13.983  1.00  0.00           N  
ATOM     66  CA  GLU A  18      15.027  27.040  13.895  1.00  0.00           C  
ATOM     67  C   GLU A  18      15.192  25.677  14.559  1.00  0.00           C  
ATOM     68  O   GLU A  18      16.300  25.153  14.609  1.00  0.00           O  
ATOM     69  N   PRO A  19      14.115  25.101  15.102  1.00  0.00           N  
ATOM     70  CA  PRO A  19      14.164  23.706  15.487  1.00  0.00           C  
ATOM     71  C   PRO A  19      14.689  22.674  14.488  1.00  0.00           C  
ATOM     72  O   PRO A  19      15.053  21.565  14.888  1.00  0.00           O  
ATOM     73  N   SER A  20      14.626  22.952  13.191  1.00  0.00           N  
ATOM     74  CA  SER A  20      15.009  22.109  12.072  1.00  0.00           C  
ATOM     75  C   SER A  20      16.510  22.232  11.793  1.00  0.00           C  
ATOM     76  O   SER A  20      16.940  21.370  11.036  1.00  0.00           O  
ATOM     77  N   ASP A  21      17.235  23.185  12.380  1.00  0.00           N  
ATOM     78  CA  ASP A  21      18.670  23.409  12.354  1.00  0.00           C  
ATOM     79  C   ASP A  21      19.469  22.338  13.092  1.00  0.00           C  
ATOM     80  O   ASP A  21      19.033  22.075  14.207  1.00  0.00           O  
ATOM     81  N   THR A  22      20.515  21.823  12.447  1.00  0.00           N  
ATOM     82  CA  THR A  22      21.338  20.827  13.104  1.00  0.00           C  
ATOM     83  C   THR A  22      22.374  21.465  14.031  1.00  0.00           C  
ATOM     84  O   THR A  22      22.752  22.618  13.857  1.00  0.00           O  
ATOM     85  N   ILE A  23      22.910  20.588  14.878  1.00  0.00           N  
ATOM     86  CA  ILE A  23      24.032  20.909  15.745  1.00  0.00           C  
ATOM     87  C   ILE A  23      25.261  21.333  14.954  1.00  0.00           C  
ATOM     88  O   ILE A  23      26.012  22.236  15.323  1.00  0.00           O  
ATOM     89  N   GLU A  24      25.397  20.772  13.755  1.00  0.00           N  
ATOM     90  CA  GLU A  24      26.479  20.991  12.812  1.00  0.00           C  
ATOM     91  C   GLU A  24      26.387  22.348  12.119  1.00  0.00           C  
ATOM     92  O   GLU A  24      27.332  22.923  11.592  1.00  0.00           O  
ATOM     93  N   ASN A  25      25.202  22.945  12.207  1.00  0.00           N  
ATOM     94  CA  ASN A  25      24.809  24.239  11.679  1.00  0.00           C  
ATOM     95  C   ASN A  25      24.871  25.309  12.778  1.00  0.00           C  
ATOM     96  O   ASN A  25      25.317  26.432  12.522  1.00  0.00           O  
ATOM     97  N   VAL A  26      24.676  24.930  14.035  1.00  0.00           N  
ATOM     98  CA  VAL A  26      24.915  25.696  15.241  1.00  0.00           C  
ATOM     99  C   VAL A  26      26.340  26.275  15.292  1.00  0.00           C  
ATOM    100  O   VAL A  26      26.456  27.491  15.382  1.00  0.00           O  
ATOM    101  N   LYS A  27      27.304  25.357  15.247  1.00  0.00           N  
ATOM    102  CA  LYS A  27      28.717  25.669  15.222  1.00  0.00           C  
ATOM    103  C   LYS A  27      29.109  26.640  14.098  1.00  0.00           C  
ATOM    104  O   LYS A  27      29.988  27.465  14.338  1.00  0.00           O  
ATOM    105  N   ALA A  28      28.532  26.424  12.915  1.00  0.00           N  
ATOM    106  CA  ALA A  28      28.715  27.305  11.784  1.00  0.00           C  
ATOM    107  C   ALA A  28      28.355  28.762  12.095  1.00  0.00           C  
ATOM    108  O   ALA A  28      29.165  29.613  11.732  1.00  0.00           O  
ATOM    109  N   LYS A  29      27.279  29.017  12.838  1.00  0.00           N  
ATOM    110  CA  LYS A  29      26.969  30.399  13.151  1.00  0.00           C  
ATOM    111  C   LYS A  29      27.856  30.963  14.255  1.00  0.00           C  
ATOM    112  O   LYS A  29      28.086  32.169  14.307  1.00  0.00           O  
ATOM    113  N   ILE A  30      28.369  30.154  15.182  1.00  0.00           N  
ATOM    114  CA  ILE A  30      29.391  30.511  16.142  1.00  0.00           C  
ATOM    115  C   ILE A  30      30.712  30.893  15.468  1.00  0.00           C  
ATOM    116  O   ILE A  30      31.353  31.842  15.911  1.00  0.00           O  
ATOM    117  N   GLN A  31      31.075  30.270  14.358  1.00  0.00           N  
ATOM    118  CA  GLN A  31      32.185  30.692  13.533  1.00  0.00           C  
ATOM    119  C   GLN A  31      32.036  32.122  13.009  1.00  0.00           C  
ATOM    120  O   GLN A  31      33.004  32.876  13.021  1.00  0.00           O  
ATOM    121  N   ASP A  32      30.843  32.501  12.554  1.00  0.00           N  
ATOM    122  CA  ASP A  32      30.479  33.800  12.018  1.00  0.00           C  
ATOM    123  C   ASP A  32      30.359  34.878  13.103  1.00  0.00           C  
ATOM    124  O   ASP A  32      30.906  35.970  12.957  1.00  0.00           O  
ATOM    125  N   LYS A  33      29.672  34.601  14.210  1.00  0.00           N  
ATOM    126  CA  LYS A  33      29.592  35.516  15.336  1.00  0.00           C  
ATOM    127  C   LYS A  33      30.895  35.721  16.112  1.00  0.00           C  
ATOM    128  O   LYS A  33      31.151  36.844  16.527  1.00  0.00           O  
ATOM    129  N   GLU A  34      31.666  34.656  16.295  1.00  0.00           N  
ATOM    130  CA  GLU A  34      32.639  34.375  17.332  1.00  0.00           C  
ATOM    131  C   GLU A  34      34.013  33.927  16.845  1.00  0.00           C  
ATOM    132  O   GLU A  34      34.983  33.988  17.593  1.00  0.00           O  
ATOM    133  N   GLY A  35      34.118  33.468  15.597  1.00  0.00           N  
ATOM    134  CA  GLY A  35      35.343  33.309  14.831  1.00  0.00           C  
ATOM    135  C   GLY A  35      35.917  31.893  14.832  1.00  0.00           C  
ATOM    136  O   GLY A  35      36.620  31.541  13.886  1.00  0.00           O  
ATOM    137  N   ILE A  36      35.581  31.070  15.816  1.00  0.00           N  
ATOM    138  CA  ILE A  36      36.267  29.839  16.168  1.00  0.00           C  
ATOM    139  C   ILE A  36      35.720  28.689  15.328  1.00  0.00           C  
ATOM    140  O   ILE A  36      34.502  28.509  15.325  1.00  0.00           O  
ATOM    141  N   PRO A  37      36.585  28.066  14.533  1.00  0.00           N  
ATOM    142  CA  PRO A  37      36.343  26.896  13.699  1.00  0.00           C  
ATOM    143  C   PRO A  37      35.590  25.750  14.368  1.00  0.00           C  
ATOM    144  O   PRO A  37      35.607  25.678  15.599  1.00  0.00           O  
ATOM    145  N   PRO A  38      34.816  24.986  13.603  1.00  0.00           N  
ATOM    146  CA  PRO A  38      33.911  23.972  14.104  1.00  0.00           C  
ATOM    147  C   PRO A  38      34.706  22.815  14.710  1.00  0.00           C  
ATOM    148  O   PRO A  38      34.167  22.123  15.564  1.00  0.00           O  
ATOM    149  N   ASP A  39      35.892  22.497  14.194  1.00  0.00           N  
ATOM    150  CA  ASP A  39      36.821  21.553  14.791  1.00  0.00           C  
ATOM    151  C   ASP A  39      37.098  21.801  16.272  1.00  0.00           C  
ATOM    152  O   ASP A  39      37.211  20.810  16.994  1.00  0.00           O  
ATOM    153  N   GLN A  40      37.153  23.055  16.719  1.00  0.00           N  
ATOM    154  CA  GLN A  40      37.761  23.556  17.930  1.00  0.00           C  
ATOM    155  C   GLN A  40      36.637  23.790  18.941  1.00  0.00           C  
ATOM    156  O   GLN A  40      36.898  24.024  20.118  1.00  0.00           O  
ATOM    157  N   GLN A  41      35.370  23.639  18.576  1.00  0.00           N  
ATOM    158  CA  GLN A  41      34.213  23.787  19.434  1.00  0.00           C  
ATOM    159  C   GLN A  41      33.810  22.541  20.230  1.00  0.00           C  
ATOM    160  O   GLN A  41      33.952  21.407  19.773  1.00  0.00           O  
ATOM    161  N   ARG A  42      33.399  22.805  21.464  1.00  0.00           N  
ATOM    162  CA  ARG A  42      32.906  21.760  22.345  1.00  0.00           C  
ATOM    163  C   ARG A  42      31.565  22.351  22.791  1.00  0.00           C  
ATOM    164  O   ARG A  42      31.526  23.188  23.686  1.00  0.00           O  
ATOM    165  N   LEU A  43      30.498  21.944  22.096  1.00  0.00           N  
ATOM    166  CA  LEU A  43      29.167  22.463  22.312  1.00  0.00           C  
ATOM    167  C   LEU A  43      28.417  21.815  23.469  1.00  0.00           C  
ATOM    168  O   LEU A  43      28.077  20.653  23.269  1.00  0.00           O  
ATOM    169  N   ILE A  44      28.105  22.420  24.619  1.00  0.00           N  
ATOM    170  CA  ILE A  44      27.524  21.851  25.822  1.00  0.00           C  
ATOM    171  C   ILE A  44      26.171  22.509  26.125  1.00  0.00           C  
ATOM    172  O   ILE A  44      25.980  23.701  25.903  1.00  0.00           O  
ATOM    173  N   PHE A  45      25.259  21.685  26.641  1.00  0.00           N  
ATOM    174  CA  PHE A  45      24.033  22.028  27.320  1.00  0.00           C  
ATOM    175  C   PHE A  45      23.982  20.992  28.455  1.00  0.00           C  
ATOM    176  O   PHE A  45      23.992  19.775  28.277  1.00  0.00           O  
ATOM    177  N   ALA A  46      23.904  21.573  29.648  1.00  0.00           N  
ATOM    178  CA  ALA A  46      23.620  20.945  30.921  1.00  0.00           C  
ATOM    179  C   ALA A  46      24.380  19.648  31.155  1.00  0.00           C  
ATOM    180  O   ALA A  46      23.852  18.723  31.768  1.00  0.00           O  
ATOM    181  N   GLY A  47      25.606  19.473  30.669  1.00  0.00           N  
ATOM    182  CA  GLY A  47      26.464  18.337  30.946  1.00  0.00           C  
ATOM    183  C   GLY A  47      26.769  17.509  29.706  1.00  0.00           C  
ATOM    184  O   GLY A  47      27.856  16.956  29.642  1.00  0.00           O  
ATOM    185  N   LYS A  48      25.763  17.459  28.827  1.00  0.00           N  
ATOM    186  CA  LYS A  48      25.723  16.727  27.571  1.00  0.00           C  
ATOM    187  C   LYS A  48      26.481  17.453  26.454  1.00  0.00           C  
ATOM    188  O   LYS A  48      26.183  18.587  26.089  1.00  0.00           O  
ATOM    189  N   GLN A  49      27.469  16.732  25.921  1.00  0.00           N  
ATOM    190  CA  GLN A  49      28.296  17.172  24.809  1.00  0.00           C  
ATOM    191  C   GLN A  49      27.355  16.882  23.648  1.00  0.00           C  
ATOM    192  O   GLN A  49      27.213  15.699  23.349  1.00  0.00           O  
ATOM    193  N   LEU A  50      26.833  17.902  22.970  1.00  0.00           N  
ATOM    194  CA  LEU A  50      25.824  17.854  21.920  1.00  0.00           C  
ATOM    195  C   LEU A  50      26.481  17.356  20.631  1.00  0.00           C  
ATOM    196  O   LEU A  50      27.417  17.985  20.151  1.00  0.00           O  
ATOM    197  N   GLU A  51      25.933  16.269  20.092  1.00  0.00           N  
ATOM    198  CA  GLU A  51      26.535  15.410  19.098  1.00  0.00           C  
ATOM    199  C   GLU A  51      26.058  15.865  17.712  1.00  0.00           C  
ATOM    200  O   GLU A  51      25.017  16.470  17.493  1.00  0.00           O  
ATOM    201  N   ASP A  52      26.984  15.580  16.801  1.00  0.00           N  
ATOM    202  CA  ASP A  52      26.863  16.148  15.480  1.00  0.00           C  
ATOM    203  C   ASP A  52      25.911  15.310  14.620  1.00  0.00           C  
ATOM    204  O   ASP A  52      25.977  14.081  14.593  1.00  0.00           O  
ATOM    205  N   GLY A  53      25.099  16.036  13.857  1.00  0.00           N  
ATOM    206  CA  GLY A  53      24.155  15.562  12.864  1.00  0.00           C  
ATOM    207  C   GLY A  53      22.678  15.611  13.256  1.00  0.00           C  
ATOM    208  O   GLY A  53      21.758  15.576  12.442  1.00  0.00           O  
ATOM    209  N   ARG A  54      22.361  15.678  14.548  1.00  0.00           N  
ATOM    210  CA  ARG A  54      21.046  15.807  15.137  1.00  0.00           C  
ATOM    211  C   ARG A  54      20.531  17.227  14.926  1.00  0.00           C  
ATOM    212  O   ARG A  54      21.286  18.196  15.020  1.00  0.00           O  
ATOM    213  N   THR A  55      19.223  17.335  14.725  1.00  0.00           N  
ATOM    214  CA  THR A  55      18.405  18.531  14.739  1.00  0.00           C  
ATOM    215  C   THR A  55      18.218  18.930  16.208  1.00  0.00           C  
ATOM    216  O   THR A  55      18.095  18.124  17.129  1.00  0.00           O  
ATOM    217  N   LEU A  56      18.195  20.246  16.399  1.00  0.00           N  
ATOM    218  CA  LEU A  56      17.754  20.884  17.621  1.00  0.00           C  
ATOM    219  C   LEU A  56      16.435  20.373  18.197  1.00  0.00           C  
ATOM    220  O   LEU A  56      16.241  20.303  19.414  1.00  0.00           O  
ATOM    221  N   SER A  57      15.485  20.057  17.315  1.00  0.00           N  
ATOM    222  CA  SER A  57      14.217  19.457  17.679  1.00  0.00           C  
ATOM    223  C   SER A  57      14.356  18.026  18.202  1.00  0.00           C  
ATOM    224  O   SER A  57      13.652  17.637  19.133  1.00  0.00           O  
ATOM    225  N   ASP A  58      15.345  17.277  17.736  1.00  0.00           N  
ATOM    226  CA  ASP A  58      15.651  15.926  18.133  1.00  0.00           C  
ATOM    227  C   ASP A  58      16.370  15.927  19.483  1.00  0.00           C  
ATOM    228  O   ASP A  58      16.179  15.051  20.323  1.00  0.00           O  
ATOM    229  N   TYR A  59      17.217  16.939  19.656  1.00  0.00           N  
ATOM    230  CA  TYR A  59      17.798  17.159  20.971  1.00  0.00           C  
ATOM    231  C   TYR A  59      16.830  17.629  22.057  1.00  0.00           C  
ATOM    232  O   TYR A  59      17.237  17.540  23.205  1.00  0.00           O  
ATOM    233  N   ASN A  60      15.663  18.213  21.780  1.00  0.00           N  
ATOM    234  CA  ASN A  60      14.788  18.856  22.730  1.00  0.00           C  
ATOM    235  C   ASN A  60      15.145  20.228  23.300  1.00  0.00           C  
ATOM    236  O   ASN A  60      14.846  20.592  24.440  1.00  0.00           O  
ATOM    237  N   ILE A  61      15.906  21.038  22.568  1.00  0.00           N  
ATOM    238  CA  ILE A  61      16.370  22.360  22.923  1.00  0.00           C  
ATOM    239  C   ILE A  61      15.257  23.368  22.653  1.00  0.00           C  
ATOM    240  O   ILE A  61      14.845  23.418  21.489  1.00  0.00           O
[truncated: 2,196,283 more chars]
