# Supplementary material for: ENCORE: Software for Quantitative Ensemble Comparison
Source: PLoS Comput Biol. 2015 Oct 27;11(10):e1004415. doi: 10.1371/journal.pcbi.1004415 (PMC4624683; doi:10.1371/journal.pcbi.1004415)
Supplement: S1 Software — (GZ) [file pcbi.1004415.s001.gz › encore-master/examples/experimental_ubq_ensembles/filtered_2KOX.pdb]

MODEL      1
ATOM      1  N   GLN A   2       9.871  -8.766  -1.879  1.00  9.27           N  
ATOM      2  CA  GLN A   2       8.601  -9.187  -1.241  1.00  9.07           C  
ATOM      3  C   GLN A   2       8.194  -8.251  -0.068  1.00  8.72           C  
ATOM      4  O   GLN A   2       8.940  -8.132   0.918  1.00  8.22           O  
ATOM      5  N   ILE A   3       7.027  -7.571  -0.106  1.00  5.87           N  
ATOM      6  CA  ILE A   3       6.525  -6.918   1.089  1.00  5.07           C  
ATOM      7  C   ILE A   3       5.146  -7.438   1.450  1.00  4.01           C  
ATOM      8  O   ILE A   3       4.472  -8.121   0.655  1.00  4.61           O  
ATOM      9  N   PHE A   4       4.752  -7.158   2.726  1.00  4.55           N  
ATOM     10  CA  PHE A   4       3.566  -7.683   3.364  1.00  4.68           C  
ATOM     11  C   PHE A   4       2.542  -6.592   3.718  1.00  5.30           C  
ATOM     12  O   PHE A   4       2.830  -5.670   4.495  1.00  5.58           O  
ATOM     13  N   VAL A   5       1.292  -6.709   3.239  1.00  4.44           N  
ATOM     14  CA  VAL A   5       0.218  -5.779   3.517  1.00  3.87           C  
ATOM     15  C   VAL A   5      -0.853  -6.424   4.390  1.00  4.93           C  
ATOM     16  O   VAL A   5      -1.454  -7.404   4.010  1.00  6.84           O  
ATOM     17  N   LYS A   6      -1.093  -5.799   5.531  1.00  6.04           N  
ATOM     18  CA  LYS A   6      -2.101  -6.286   6.455  1.00  6.12           C  
ATOM     19  C   LYS A   6      -3.441  -5.499   6.318  1.00  6.57           C  
ATOM     20  O   LYS A   6      -3.463  -4.251   6.376  1.00  5.76           O  
ATOM     21  N   THR A   7      -4.638  -6.102   6.021  1.00  7.41           N  
ATOM     22  CA  THR A   7      -5.868  -5.375   5.877  1.00  7.48           C  
ATOM     23  C   THR A   7      -6.546  -5.483   7.282  1.00  8.75           C  
ATOM     24  O   THR A   7      -6.096  -6.189   8.149  1.00  8.58           O  
ATOM     25  N   LEU A   8      -7.667  -4.707   7.466  1.00  9.84           N  
ATOM     26  CA  LEU A   8      -8.427  -4.630   8.716  1.00 14.15           C  
ATOM     27  C   LEU A   8      -9.186  -5.948   9.113  1.00 17.37           C  
ATOM     28  O   LEU A   8      -9.200  -6.324  10.237  1.00 17.01           O  
ATOM     29  N   THR A   9      -9.658  -6.701   8.126  1.00 18.33           N  
ATOM     30  CA  THR A   9     -10.090  -8.085   8.238  1.00 19.24           C  
ATOM     31  C   THR A   9      -8.978  -9.071   8.495  1.00 19.48           C  
ATOM     32  O   THR A   9      -9.193 -10.179   8.972  1.00 23.14           O  
ATOM     33  N   GLY A  10      -7.735  -8.618   8.266  1.00 19.43           N  
ATOM     34  CA  GLY A  10      -6.571  -9.334   8.761  1.00 18.74           C  
ATOM     35  C   GLY A  10      -5.914 -10.090   7.626  1.00 17.62           C  
ATOM     36  O   GLY A  10      -4.928 -10.866   7.797  1.00 19.74           O  
ATOM     37  N   LYS A  11      -6.455  -9.998   6.387  1.00 13.56           N  
ATOM     38  CA  LYS A  11      -5.814 -10.558   5.224  1.00 11.91           C  
ATOM     39  C   LYS A  11      -4.362 -10.169   4.998  1.00 10.18           C  
ATOM     40  O   LYS A  11      -4.034  -8.978   5.073  1.00  9.10           O  
ATOM     41  N   THR A  12      -3.506 -11.165   4.676  1.00  9.63           N  
ATOM     42  CA  THR A  12      -2.121 -10.902   4.454  1.00  9.85           C  
ATOM     43  C   THR A  12      -2.027 -10.880   2.940  1.00 11.66           C  
ATOM     44  O   THR A  12      -2.042 -11.927   2.265  1.00 12.33           O  
ATOM     45  N   ILE A  13      -1.753  -9.696   2.321  1.00 10.42           N  
ATOM     46  CA  ILE A  13      -1.511  -9.548   0.870  1.00 11.84           C  
ATOM     47  C   ILE A  13       0.028  -9.506   0.782  1.00 10.55           C  
ATOM     48  O   ILE A  13       0.736  -8.784   1.475  1.00 11.92           O  
ATOM     49  N   THR A  14       0.600 -10.380  -0.095  1.00  9.39           N  
ATOM     50  CA  THR A  14       2.015 -10.499  -0.268  1.00  9.63           C  
ATOM     51  C   THR A  14       2.225  -9.937  -1.728  1.00 11.20           C  
ATOM     52  O   THR A  14       1.553 -10.324  -2.687  1.00 11.63           O  
ATOM     53  N   LEU A  15       3.149  -8.981  -1.887  1.00  8.29           N  
ATOM     54  CA  LEU A  15       3.296  -8.290  -3.172  1.00  9.03           C  
ATOM     55  C   LEU A  15       4.746  -8.331  -3.637  1.00  8.59           C  
ATOM     56  O   LEU A  15       5.620  -7.734  -2.985  1.00  7.79           O  
ATOM     57  N   GLU A  16       5.100  -8.881  -4.804  1.00 11.04           N  
ATOM     58  CA  GLU A  16       6.430  -8.552  -5.325  1.00 11.50           C  
ATOM     59  C   GLU A  16       6.417  -7.136  -5.964  1.00 10.13           C  
ATOM     60  O   GLU A  16       5.626  -6.839  -6.809  1.00  9.83           O  
ATOM     61  N   VAL A  17       7.298  -6.283  -5.487  1.00  8.99           N  
ATOM     62  CA  VAL A  17       7.411  -4.964  -5.916  1.00  8.85           C  
ATOM     63  C   VAL A  17       8.904  -4.710  -6.032  1.00  8.04           C  
ATOM     64  O   VAL A  17       9.725  -5.523  -5.654  1.00  8.99           O  
ATOM     65  N   GLU A  18       9.352  -3.510  -6.404  1.00  7.29           N  
ATOM     66  CA  GLU A  18      10.701  -3.092  -6.402  1.00  7.08           C  
ATOM     67  C   GLU A  18      10.759  -1.773  -5.684  1.00  6.45           C  
ATOM     68  O   GLU A  18       9.715  -1.131  -5.556  1.00  5.28           O  
ATOM     69  N   PRO A  19      11.867  -1.399  -5.064  1.00  7.24           N  
ATOM     70  CA  PRO A  19      11.879  -0.214  -4.216  1.00  7.07           C  
ATOM     71  C   PRO A  19      11.578   1.125  -4.916  1.00  6.65           C  
ATOM     72  O   PRO A  19      11.184   2.052  -4.224  1.00  6.37           O  
ATOM     73  N   SER A  20      11.786   1.227  -6.249  1.00  6.80           N  
ATOM     74  CA  SER A  20      11.463   2.362  -7.041  1.00  6.28           C  
ATOM     75  C   SER A  20      10.037   2.283  -7.619  1.00  8.45           C  
ATOM     76  O   SER A  20       9.679   3.047  -8.517  1.00  7.26           O  
ATOM     77  N   ASP A  21       9.118   1.397  -7.083  1.00  7.50           N  
ATOM     78  CA  ASP A  21       7.723   1.472  -7.459  1.00  7.70           C  
ATOM     79  C   ASP A  21       7.009   2.487  -6.599  1.00  7.08           C  
ATOM     80  O   ASP A  21       7.470   2.746  -5.488  1.00  8.11           O  
ATOM     81  N   THR A  22       5.988   3.159  -7.118  1.00  5.37           N  
ATOM     82  CA  THR A  22       5.213   4.166  -6.381  1.00  6.01           C  
ATOM     83  C   THR A  22       4.171   3.535  -5.474  1.00  8.01           C  
ATOM     84  O   THR A  22       3.797   2.448  -5.708  1.00  8.11           O  
ATOM     85  N   ILE A  23       3.650   4.315  -4.556  1.00  8.32           N  
ATOM     86  CA  ILE A  23       2.546   3.866  -3.711  1.00  9.92           C  
ATOM     87  C   ILE A  23       1.279   3.737  -4.579  1.00 10.01           C  
ATOM     88  O   ILE A  23       0.449   2.835  -4.312  1.00  8.71           O  
ATOM     89  N   GLU A  24       1.124   4.486  -5.702  1.00  9.54           N  
ATOM     90  CA  GLU A  24       0.008   4.210  -6.656  1.00 11.81           C  
ATOM     91  C   GLU A  24       0.212   2.937  -7.465  1.00 11.14           C  
ATOM     92  O   GLU A  24      -0.733   2.223  -7.852  1.00 10.62           O  
ATOM     93  N   ASN A  25       1.511   2.592  -7.743  1.00  9.43           N  
ATOM     94  CA  ASN A  25       1.838   1.234  -8.224  1.00 10.96           C  
ATOM     95  C   ASN A  25       1.367   0.126  -7.250  1.00  9.68           C  
ATOM     96  O   ASN A  25       0.820  -0.846  -7.602  1.00  9.33           O  
ATOM     97  N   VAL A  26       1.623   0.341  -5.937  1.00  6.52           N  
ATOM     98  CA  VAL A  26       1.131  -0.581  -4.912  1.00  5.53           C  
ATOM     99  C   VAL A  26      -0.386  -0.799  -4.954  1.00  4.42           C  
ATOM    100  O   VAL A  26      -0.837  -1.951  -4.925  1.00  3.40           O  
ATOM    101  N   LYS A  27      -1.146   0.307  -5.061  1.00  2.64           N  
ATOM    102  CA  LYS A  27      -2.625   0.440  -5.033  1.00  4.14           C  
ATOM    103  C   LYS A  27      -3.174  -0.319  -6.275  1.00  5.58           C  
ATOM    104  O   LYS A  27      -4.188  -0.998  -6.179  1.00  4.11           O  
ATOM    105  N   ALA A  28      -2.517  -0.261  -7.458  1.00  6.61           N  
ATOM    106  CA  ALA A  28      -2.940  -0.877  -8.639  1.00  7.74           C  
ATOM    107  C   ALA A  28      -2.700  -2.446  -8.502  1.00  9.17           C  
ATOM    108  O   ALA A  28      -3.602  -3.226  -8.631  1.00 11.45           O  
ATOM    109  N   LYS A  29      -1.487  -2.822  -8.085  1.00  8.96           N  
ATOM    110  CA  LYS A  29      -1.181  -4.249  -7.818  1.00  7.90           C  
ATOM    111  C   LYS A  29      -2.180  -4.961  -6.880  1.00  6.92           C  
ATOM    112  O   LYS A  29      -2.630  -6.076  -7.142  1.00  6.87           O  
ATOM    113  N   ILE A  30      -2.522  -4.321  -5.711  1.00  4.57           N  
ATOM    114  CA  ILE A  30      -3.535  -4.834  -4.808  1.00  5.58           C  
ATOM    115  C   ILE A  30      -4.918  -4.932  -5.403  1.00  7.26           C  
ATOM    116  O   ILE A  30      -5.648  -5.906  -5.173  1.00  9.46           O  
ATOM    117  N   GLN A  31      -5.326  -3.979  -6.281  1.00  7.06           N  
ATOM    118  CA  GLN A  31      -6.622  -4.004  -6.996  1.00  8.67           C  
ATOM    119  C   GLN A  31      -6.705  -5.216  -7.899  1.00 10.90           C  
ATOM    120  O   GLN A  31      -7.674  -6.000  -7.950  1.00  9.63           O  
ATOM    121  N   ASP A  32      -5.609  -5.522  -8.617  1.00 10.93           N  
ATOM    122  CA  ASP A  32      -5.422  -6.657  -9.504  1.00 14.01           C  
ATOM    123  C   ASP A  32      -5.681  -7.943  -8.770  1.00 14.04           C  
ATOM    124  O   ASP A  32      -6.412  -8.832  -9.196  1.00 13.39           O  
ATOM    125  N   LYS A  33      -5.205  -8.069  -7.503  1.00 14.22           N  
ATOM    126  CA  LYS A  33      -5.425  -9.190  -6.644  1.00 14.00           C  
ATOM    127  C   LYS A  33      -6.823  -9.201  -5.939  1.00 12.37           C  
ATOM    128  O   LYS A  33      -7.462 -10.242  -5.889  1.00 12.17           O  
ATOM    129  N   GLU A  34      -7.308  -8.072  -5.363  1.00 10.11           N  
ATOM    130  CA  GLU A  34      -8.381  -8.181  -4.342  1.00 10.07           C  
ATOM    131  C   GLU A  34      -9.617  -7.432  -4.778  1.00  9.32           C  
ATOM    132  O   GLU A  34     -10.634  -7.481  -4.132  1.00 11.61           O  
ATOM    133  N   GLY A  35      -9.567  -6.696  -5.944  1.00  7.22           N  
ATOM    134  CA  GLY A  35     -10.712  -5.984  -6.591  1.00  6.29           C  
ATOM    135  C   GLY A  35     -10.959  -4.631  -5.951  1.00  6.93           C  
ATOM    136  O   GLY A  35     -11.906  -3.880  -6.299  1.00  7.41           O  
ATOM    137  N   ILE A  36     -10.118  -4.187  -4.959  1.00  5.86           N  
ATOM    138  CA  ILE A  36     -10.196  -2.881  -4.268  1.00  6.07           C  
ATOM    139  C   ILE A  36      -9.694  -1.761  -5.128  1.00  6.36           C  
ATOM    140  O   ILE A  36      -8.513  -1.744  -5.494  1.00  6.18           O  
ATOM    141  N   PRO A  37     -10.471  -0.709  -5.452  1.00  8.65           N  
ATOM    142  CA  PRO A  37      -9.996   0.364  -6.325  1.00  9.18           C  
ATOM    143  C   PRO A  37      -9.009   1.214  -5.442  1.00  9.85           C  
ATOM    144  O   PRO A  37      -9.293   1.401  -4.263  1.00  8.51           O  
ATOM    145  N   PRO A  38      -7.944   1.774  -5.981  1.00  8.71           N  
ATOM    146  CA  PRO A  38      -7.012   2.674  -5.301  1.00  9.08           C  
ATOM    147  C   PRO A  38      -7.642   3.791  -4.514  1.00  9.28           C  
ATOM    148  O   PRO A  38      -7.139   4.204  -3.450  1.00  6.50           O  
ATOM    149  N   ASP A  39      -8.791   4.320  -5.093  1.00 11.20           N  
ATOM    150  CA  ASP A  39      -9.568   5.444  -4.536  1.00 14.96           C  
ATOM    151  C   ASP A  39     -10.068   5.158  -3.083  1.00 13.99           C  
ATOM    152  O   ASP A  39     -10.286   6.190  -2.409  1.00 13.75           O  
ATOM    153  N   GLN A  40     -10.337   3.885  -2.738  1.00 11.60           N  
ATOM    154  CA  GLN A  40     -10.894   3.509  -1.458  1.00 10.76           C  
ATOM    155  C   GLN A  40      -9.747   3.027  -0.502  1.00  8.01           C  
ATOM    156  O   GLN A  40      -9.918   2.771   0.691  1.00  8.96           O  
ATOM    157  N   GLN A  41      -8.501   2.942  -1.035  1.00  6.52           N  
ATOM    158  CA  GLN A  41      -7.375   2.443  -0.259  1.00  3.87           C  
ATOM    159  C   GLN A  41      -6.645   3.568   0.414  1.00  4.79           C  
ATOM    160  O   GLN A  41      -6.437   4.587  -0.287  1.00  6.34           O  
ATOM    161  N   ARG A  42      -6.225   3.397   1.695  1.00  5.73           N  
ATOM    162  CA  ARG A  42      -5.266   4.249   2.335  1.00  6.97           C  
ATOM    163  C   ARG A  42      -4.311   3.199   2.927  1.00  7.15           C  
ATOM    164  O   ARG A  42      -4.690   2.130   3.420  1.00  7.33           O  
ATOM    165  N   LEU A  43      -3.013   3.529   2.825  1.00  4.65           N  
ATOM    166  CA  LEU A  43      -1.883   2.699   3.092  1.00  3.51           C  
ATOM    167  C   LEU A  43      -0.995   3.301   4.135  1.00  5.56           C  
ATOM    168  O   LEU A  43      -0.782   4.504   4.145  1.00  4.19           O  
ATOM    169  N   ILE A  44      -0.590   2.592   5.170  1.00  4.58           N  
ATOM    170  CA  ILE A  44       0.110   3.086   6.335  1.00  5.55           C  
ATOM    171  C   ILE A  44       1.311   2.258   6.575  1.00  5.46           C  
ATOM    172  O   ILE A  44       1.337   1.024   6.617  1.00  6.04           O  
ATOM    173  N   PHE A  45       2.473   2.917   6.636  1.00  6.75           N  
ATOM    174  CA  PHE A  45       3.732   2.368   7.092  1.00  4.70           C  
ATOM    175  C   PHE A  45       4.079   3.130   8.312  1.00  6.34           C  
ATOM    176  O   PHE A  45       4.176   4.349   8.228  1.00  5.45           O  
ATOM    177  N   ALA A  46       4.395   2.472   9.493  1.00  6.53           N  
ATOM    178  CA  ALA A  46       4.886   3.014  10.724  1.00  7.15           C  
ATOM    179  C   ALA A  46       4.112   4.230  11.336  1.00  9.00           C  
ATOM    180  O   ALA A  46       4.743   5.209  11.805  1.00 11.15           O  
ATOM    181  N   GLY A  47       2.796   4.163  11.348  1.00  9.35           N  
ATOM    182  CA  GLY A  47       1.904   5.222  11.695  1.00 11.68           C  
ATOM    183  C   GLY A  47       1.653   6.327  10.634  1.00 11.14           C  
ATOM    184  O   GLY A  47       0.876   7.259  10.976  1.00 13.93           O  
ATOM    185  N   LYS A  48       2.181   6.171   9.409  1.00 10.47           N  
ATOM    186  CA  LYS A  48       2.190   7.279   8.501  1.00  8.82           C  
ATOM    187  C   LYS A  48       1.322   7.004   7.291  1.00  7.68           C  
ATOM    188  O   LYS A  48       1.438   6.076   6.504  1.00  6.47           O  
ATOM    189  N   GLN A  49       0.375   7.898   7.014  1.00  8.89           N  
ATOM    190  CA  GLN A  49      -0.420   7.838   5.805  1.00  7.18           C  
ATOM    191  C   GLN A  49       0.390   8.051   4.501  1.00  8.23           C  
ATOM    192  O   GLN A  49       1.024   9.084   4.380  1.00  9.70           O  
ATOM    193  N   LEU A  50       0.307   7.126   3.532  1.00  6.51           N  
ATOM    194  CA  LEU A  50       1.273   7.174   2.374  1.00  7.41           C  
ATOM    195  C   LEU A  50       0.686   7.780   1.121  1.00  8.27           C  
ATOM    196  O   LEU A  50      -0.517   7.541   0.771  1.00  8.34           O  
ATOM    197  N   GLU A  51       1.487   8.639   0.491  1.00  9.43           N  
ATOM    198  CA  GLU A  51       0.997   9.394  -0.635  1.00 11.90           C  
ATOM    199  C   GLU A  51       1.405   8.811  -1.969  1.00 11.49           C  
ATOM    200  O   GLU A  51       2.440   8.189  -2.125  1.00  9.88           O  
ATOM    201  N   ASP A  52       0.450   8.857  -2.978  1.00 12.71           N  
ATOM    202  CA  ASP A  52       0.389   8.047  -4.124  1.00 16.56           C  
ATOM    203  C   ASP A  52       1.602   8.115  -5.153  1.00 15.83           C  
ATOM    204  O   ASP A  52       2.135   7.122  -5.531  1.00 17.21           O  
ATOM    205  N   GLY A  53       2.131   9.297  -5.483  1.00 15.00           N  
ATOM    206  CA  GLY A  53       3.207   9.461  -6.478  1.00 11.77           C  
ATOM    207  C   GLY A  53       4.556   9.237  -5.942  1.00 11.10           C  
ATOM    208  O   GLY A  53       5.520   9.029  -6.659  1.00 11.25           O  
ATOM    209  N   ARG A  54       4.668   9.180  -4.590  1.00  8.53           N  
ATOM    210  CA  ARG A  54       5.975   8.889  -3.938  1.00  9.05           C  
ATOM    211  C   ARG A  54       6.388   7.407  -4.082  1.00  8.96           C  
ATOM    212  O   ARG A  54       5.541   6.535  -4.203  1.00 11.60           O  
ATOM    213  N   THR A  55       7.719   7.043  -3.975  1.00  9.05           N  
ATOM    214  CA  THR A  55       8.254   5.700  -4.110  1.00  9.03           C  
ATOM    215  C   THR A  55       8.482   5.059  -2.702  1.00  8.15           C  
ATOM    216  O   THR A  55       8.658   5.677  -1.689  1.00  5.91           O  
ATOM    217  N   LEU A  56       8.447   3.709  -2.679  1.00  6.91           N  
ATOM    218  CA  LEU A  56       8.785   2.835  -1.558  1.00  8.29           C  
ATOM    219  C   LEU A  56      10.151   3.081  -0.953  1.00  8.05           C  
ATOM    220  O   LEU A  56      10.241   3.097   0.256  1.00 10.17           O  
ATOM    221  N   SER A  57      11.145   3.419  -1.749  1.00  8.92           N  
ATOM    222  CA  SER A  57      12.452   3.909  -1.364  1.00  9.00           C  
ATOM    223  C   SER A  57      12.412   5.235  -0.529  1.00  9.44           C  
ATOM    224  O   SER A  57      13.150   5.478   0.383  1.00 10.91           O  
ATOM    225  N   ASP A  58      11.527   6.121  -0.921  1.00  9.11           N  
ATOM    226  CA  ASP A  58      11.416   7.453  -0.371  1.00  7.91           C  
ATOM    227  C   ASP A  58      10.775   7.428   1.008  1.00  9.12           C  
ATOM    228  O   ASP A  58      11.041   8.233   1.905  1.00  8.61           O  
ATOM    229  N   TYR A  59      10.000   6.361   1.322  1.00  7.97           N  
ATOM    230  CA  TYR A  59       9.443   6.060   2.570  1.00  8.45           C  
ATOM    231  C   TYR A  59      10.306   5.108   3.314  1.00 10.98           C  
ATOM    232  O   TYR A  59       9.895   4.734   4.433  1.00 12.95           O  
ATOM    233  N   ASN A  60      11.461   4.562   2.752  1.00 12.38           N  
ATOM    234  CA  ASN A  60      12.242   3.584   3.509  1.00 13.94           C  
ATOM    235  C   ASN A  60      11.583   2.220   3.738  1.00 14.16           C  
ATOM    236  O   ASN A  60      11.671   1.646   4.820  1.00 14.26           O  
ATOM    237  N   ILE A  61      10.879   1.800   2.639  1.00 11.08           N  
ATOM    238  CA  ILE A  61      10.121   0.602   2.542  1.00 11.78           C  
ATOM    239  C   ILE A  61      11.004  -0.373   1.697  1.00 13.74           C  
ATOM    240  O   ILE A  61      11.424  -0.101   0.572  1.00 14.60           O  
ATOM    241  N   GLN A  62      11.272  -1.527   2.274  1.00 13.97           N  
ATOM    242  CA  GLN A  62      12.153  -2.481   1.708  1.00 15.52           C  
ATOM    243  C   GLN A  62      11.563  -3.879   1.980  1.00 13.94           C  
ATOM    244  O   GLN A  62      10.504  -4.027   2.599  1.00 12.15           O  
ATOM    245  N   LYS A  63      12.291  -4.941   1.597  1.00 11.73           N  
ATOM    246  CA  LYS A  63      11.761  -6.267   1.698  1.00 11.97           C  
ATOM    247  C   LYS A  63      11.293  -6.588   3.087  1.00 10.41           C  
ATOM    248  O   LYS A  63      11.855  -6.121   4.099  1.00  9.59           O  
ATOM    249  N   GLU A  64      10.188  -7.338   3.185  1.00 10.04           N  
ATOM    250  CA  GLU A  64       9.668  -7.983   4.459  1.00 10.94           C  
ATOM    251  C   GLU A  64       9.106  -7.006   5.415  1.00  9.74           C  
ATOM    252  O   GLU A  64       8.731  -7.363   6.550  1.00  9.42           O  
ATOM    253  N   SER A  65       8.991  -5.723   4.979  1.00  6.85           N  
ATOM    254  CA  SER A  65       8.267  -4.664   5.693  1.00  6.90           C  
ATOM    255  C   SER A  65       6.764  -5.021   5.834  1.00  4.72           C  
ATOM    256  O   SER A  65       6.101  -5.630   4.978  1.00  3.91           O  
ATOM    257  N   THR A  66       6.182  -4.616   7.020  1.00  4.48           N  
ATOM    258  CA  THR A  66       4.744  -4.696   7.221  1.00  3.80           C  
ATOM    259  C   THR A  66       4.167  -3.370   6.900  1.00  4.60           C  
ATOM    260  O   THR A  66       4.518  -2.379   7.532  1.00  5.33           O  
ATOM    261  N   LEU A  67       3.154  -3.342   5.982  1.00  4.17           N  
ATOM    262  CA  LEU A  67       2.401  -2.159   5.579  1.00  3.85           C  
ATOM    263  C   LEU A  67       0.987  -2.482   5.956  1.00  3.80           C  
ATOM    264  O   LEU A  67       0.631  -3.663   6.118  1.00  5.54           O  
ATOM    265  N   HIS A  68       0.142  -1.462   6.221  1.00  2.94           N  
ATOM    266  CA  HIS A  68      -1.179  -1.682   6.708  1.00  4.17           C  
ATOM    267  C   HIS A  68      -2.131  -1.040   5.755  1.00  5.32           C  
ATOM    268  O   HIS A  68      -1.934   0.035   5.202  1.00  7.70           O  
ATOM    269  N   LEU A  69      -3.266  -1.730   5.480  1.00  5.29           N  
ATOM    270  CA  LEU A  69      -4.271  -1.306   4.501  1.00  3.97           C  
ATOM    271  C   LEU A  69      -5.616  -1.076   5.280  1.00  5.07           C  
ATOM    272  O   LEU A  69      -6.253  -1.902   5.935  1.00  4.34           O  
ATOM    273  N   VAL A  70      -6.084   0.138   5.026  1.00  4.29           N  
ATOM    274  CA  VAL A  70      -7.284   0.810   5.529  1.00  6.26           C  
ATOM    275  C   VAL A  70      -8.199   1.082   4.413  1.00  9.22           C  
ATOM    276  O   VAL A  70      -7.753   1.533   3.324  1.00  9.36           O  
TER
ENDMDL
MODEL      2
ATOM      1  N   GLN A   2      10.159  -8.506  -1.826  1.00  9.27           N  
ATOM      2  CA  GLN A   2       8.875  -8.969  -1.358  1.00  9.07           C  
ATOM      3  C   GLN A   2       8.310  -8.035  -0.235  1.00  8.72           C  
ATOM      4  O   GLN A   2       9.081  -7.717   0.701  1.00  8.22           O  
ATOM      5  N   ILE A   3       7.051  -7.610  -0.258  1.00  5.87           N  
ATOM      6  CA  ILE A   3       6.428  -6.841   0.790  1.00  5.07           C  
ATOM      7  C   ILE A   3       5.214  -7.582   1.290  1.00  4.01           C  
ATOM      8  O   ILE A   3       4.690  -8.456   0.534  1.00  4.61           O  
ATOM      9  N   PHE A   4       4.757  -7.280   2.482  1.00  4.55           N  
ATOM     10  CA  PHE A   4       3.553  -7.804   3.107  1.00  4.68           C  
ATOM     11  C   PHE A   4       2.532  -6.646   3.257  1.00  5.30           C  
ATOM     12  O   PHE A   4       2.890  -5.584   3.702  1.00  5.58           O  
ATOM     13  N   VAL A   5       1.288  -6.832   2.821  1.00  4.44           N  
ATOM     14  CA  VAL A   5       0.242  -5.766   2.992  1.00  3.87           C  
ATOM     15  C   VAL A   5      -0.849  -6.394   3.921  1.00  4.93           C  
ATOM     16  O   VAL A   5      -1.340  -7.509   3.596  1.00  6.84           O  
ATOM     17  N   LYS A   6      -1.260  -5.708   4.994  1.00  6.04           N  
ATOM     18  CA  LYS A   6      -2.033  -6.270   6.041  1.00  6.12           C  
ATOM     19  C   LYS A   6      -3.383  -5.586   6.108  1.00  6.57           C  
ATOM     20  O   LYS A   6      -3.487  -4.359   6.221  1.00  5.76           O  
ATOM     21  N   THR A   7      -4.480  -6.426   6.056  1.00  7.41           N  
ATOM     22  CA  THR A   7      -5.835  -5.901   6.104  1.00  7.48           C  
ATOM     23  C   THR A   7      -6.320  -5.903   7.509  1.00  8.75           C  
ATOM     24  O   THR A   7      -5.823  -6.602   8.381  1.00  8.58           O  
ATOM     25  N   LEU A   8      -7.431  -5.124   7.880  1.00  9.84           N  
ATOM     26  CA  LEU A   8      -7.952  -5.082   9.251  1.00 14.15           C  
ATOM     27  C   LEU A   8      -8.853  -6.280   9.538  1.00 17.37           C  
ATOM     28  O   LEU A   8      -9.341  -6.419  10.650  1.00 17.01           O  
ATOM     29  N   THR A   9      -9.130  -7.171   8.565  1.00 18.33           N  
ATOM     30  CA  THR A   9      -9.846  -8.446   8.738  1.00 19.24           C  
ATOM     31  C   THR A   9      -8.848  -9.581   8.874  1.00 19.48           C  
ATOM     32  O   THR A   9      -9.145 -10.749   9.047  1.00 23.14           O  
ATOM     33  N   GLY A  10      -7.501  -9.150   8.829  1.00 19.43           N  
ATOM     34  CA  GLY A  10      -6.363  -9.994   9.289  1.00 18.74           C  
ATOM     35  C   GLY A  10      -5.596 -10.671   8.192  1.00 17.62           C  
ATOM     36  O   GLY A  10      -4.524 -11.145   8.451  1.00 19.74           O  
ATOM     37  N   LYS A  11      -6.047 -10.612   6.980  1.00 13.56           N  
ATOM     38  CA  LYS A  11      -5.335 -11.064   5.787  1.00 11.91           C  
ATOM     39  C   LYS A  11      -4.010 -10.408   5.577  1.00 10.18           C  
ATOM     40  O   LYS A  11      -3.871  -9.214   5.772  1.00  9.10           O  
ATOM     41  N   THR A  12      -3.020 -11.189   5.106  1.00  9.63           N  
ATOM     42  CA  THR A  12      -1.769 -10.581   4.595  1.00  9.85           C  
ATOM     43  C   THR A  12      -1.547 -10.880   3.119  1.00 11.66           C  
ATOM     44  O   THR A  12      -1.288 -12.025   2.751  1.00 12.33           O  
ATOM     45  N   ILE A  13      -1.455  -9.828   2.297  1.00 10.42           N  
ATOM     46  CA  ILE A  13      -1.370  -9.885   0.818  1.00 11.84           C  
ATOM     47  C   ILE A  13       0.099  -9.773   0.441  1.00 10.55           C  
ATOM     48  O   ILE A  13       0.665  -8.741   0.631  1.00 11.92           O  
ATOM     49  N   THR A  14       0.664 -10.910  -0.033  1.00  9.39           N  
ATOM     50  CA  THR A  14       2.132 -10.929  -0.203  1.00  9.63           C  
ATOM     51  C   THR A  14       2.470 -10.523  -1.629  1.00 11.20           C  
ATOM     52  O   THR A  14       2.025 -11.090  -2.618  1.00 11.63           O  
ATOM     53  N   LEU A  15       3.268  -9.448  -1.808  1.00  8.29           N  
ATOM     54  CA  LEU A  15       3.493  -8.765  -3.113  1.00  9.03           C  
ATOM     55  C   LEU A  15       4.974  -8.583  -3.416  1.00  8.59           C  
ATOM     56  O   LEU A  15       5.716  -8.331  -2.471  1.00  7.79           O  
ATOM     57  N   GLU A  16       5.409  -8.833  -4.670  1.00 11.04           N  
ATOM     58  CA  GLU A  16       6.783  -8.677  -5.212  1.00 11.50           C  
ATOM     59  C   GLU A  16       6.803  -7.302  -5.873  1.00 10.13           C  
ATOM     60  O   GLU A  16       6.006  -6.967  -6.743  1.00  9.83           O  
ATOM     61  N   VAL A  17       7.704  -6.393  -5.387  1.00  8.99           N  
ATOM     62  CA  VAL A  17       7.863  -5.024  -5.843  1.00  8.85           C  
ATOM     63  C   VAL A  17       9.237  -4.722  -6.095  1.00  8.04           C  
ATOM     64  O   VAL A  17      10.139  -5.395  -5.653  1.00  8.99           O  
ATOM     65  N   GLU A  18       9.480  -3.646  -6.854  1.00  7.29           N  
ATOM     66  CA  GLU A  18      10.728  -2.991  -6.877  1.00  7.08           C  
ATOM     67  C   GLU A  18      10.758  -1.759  -5.972  1.00  6.45           C  
ATOM     68  O   GLU A  18       9.720  -1.169  -5.705  1.00  5.28           O  
ATOM     69  N   PRO A  19      11.841  -1.212  -5.336  1.00  7.24           N  
ATOM     70  CA  PRO A  19      11.748  -0.114  -4.431  1.00  7.07           C  
ATOM     71  C   PRO A  19      11.280   1.164  -5.112  1.00  6.65           C  
ATOM     72  O   PRO A  19      10.762   2.085  -4.425  1.00  6.37           O  
ATOM     73  N   SER A  20      11.505   1.153  -6.424  1.00  6.80           N  
ATOM     74  CA  SER A  20      11.188   2.211  -7.287  1.00  6.28           C  
ATOM     75  C   SER A  20       9.697   2.260  -7.690  1.00  8.45           C  
ATOM     76  O   SER A  20       9.244   3.234  -8.191  1.00  7.26           O  
ATOM     77  N   ASP A  21       8.896   1.218  -7.387  1.00  7.50           N  
ATOM     78  CA  ASP A  21       7.461   1.313  -7.507  1.00  7.70           C  
ATOM     79  C   ASP A  21       6.787   2.401  -6.719  1.00  7.08           C  
ATOM     80  O   ASP A  21       7.209   2.764  -5.584  1.00  8.11           O  
ATOM     81  N   THR A  22       5.756   3.079  -7.253  1.00  5.37           N  
ATOM     82  CA  THR A  22       5.085   4.160  -6.486  1.00  6.01           C  
ATOM     83  C   THR A  22       3.960   3.549  -5.611  1.00  8.01           C  
ATOM     84  O   THR A  22       3.562   2.411  -5.740  1.00  8.11           O  
ATOM     85  N   ILE A  23       3.517   4.329  -4.657  1.00  8.32           N  
ATOM     86  CA  ILE A  23       2.419   3.855  -3.733  1.00  9.92           C  
ATOM     87  C   ILE A  23       1.160   3.600  -4.554  1.00 10.01           C  
ATOM     88  O   ILE A  23       0.481   2.570  -4.325  1.00  8.71           O  
ATOM     89  N   GLU A  24       0.894   4.462  -5.573  1.00  9.54           N  
ATOM     90  CA  GLU A  24      -0.161   4.363  -6.589  1.00 11.81           C  
ATOM     91  C   GLU A  24       0.002   3.028  -7.426  1.00 11.14           C  
ATOM     92  O   GLU A  24      -0.901   2.277  -7.624  1.00 10.62           O  
ATOM     93  N   ASN A  25       1.264   2.781  -7.828  1.00  9.43           N  
ATOM     94  CA  ASN A  25       1.596   1.465  -8.392  1.00 10.96           C  
ATOM     95  C   ASN A  25       1.403   0.290  -7.461  1.00  9.68           C  
ATOM     96  O   ASN A  25       1.125  -0.796  -7.944  1.00  9.33           O  
ATOM     97  N   VAL A  26       1.566   0.464  -6.160  1.00  6.52           N  
ATOM     98  CA  VAL A  26       1.270  -0.533  -5.106  1.00  5.53           C  
ATOM     99  C   VAL A  26      -0.223  -0.789  -4.988  1.00  4.42           C  
ATOM    100  O   VAL A  26      -0.640  -1.922  -4.902  1.00  3.40           O  
ATOM    101  N   LYS A  27      -1.097   0.269  -5.122  1.00  2.64           N  
ATOM    102  CA  LYS A  27      -2.562   0.030  -5.073  1.00  4.14           C  
ATOM    103  C   LYS A  27      -3.075  -0.658  -6.281  1.00  5.58           C  
ATOM    104  O   LYS A  27      -4.124  -1.260  -6.132  1.00  4.11           O  
ATOM    105  N   ALA A  28      -2.364  -0.639  -7.475  1.00  6.61           N  
ATOM    106  CA  ALA A  28      -2.678  -1.394  -8.707  1.00  7.74           C  
ATOM    107  C   ALA A  28      -2.576  -2.839  -8.427  1.00  9.17           C  
ATOM    108  O   ALA A  28      -3.436  -3.608  -8.777  1.00 11.45           O  
ATOM    109  N   LYS A  29      -1.456  -3.265  -7.768  1.00  8.96           N  
ATOM    110  CA  LYS A  29      -1.266  -4.594  -7.277  1.00  7.90           C  
ATOM    111  C   LYS A  29      -2.297  -5.029  -6.258  1.00  6.92           C  
ATOM    112  O   LYS A  29      -2.851  -6.139  -6.350  1.00  6.87           O  
ATOM    113  N   ILE A  30      -2.684  -4.145  -5.315  1.00  4.57           N  
ATOM    114  CA  ILE A  30      -3.734  -4.448  -4.354  1.00  5.58           C  
ATOM    115  C   ILE A  30      -5.111  -4.473  -4.975  1.00  7.26           C  
ATOM    116  O   ILE A  30      -6.004  -5.289  -4.674  1.00  9.46           O  
ATOM    117  N   GLN A  31      -5.440  -3.517  -5.904  1.00  7.06           N  
ATOM    118  CA  GLN A  31      -6.563  -3.674  -6.784  1.00  8.67           C  
ATOM    119  C   GLN A  31      -6.652  -5.009  -7.581  1.00 10.90           C  
ATOM    120  O   GLN A  31      -7.692  -5.654  -7.638  1.00  9.63           O  
ATOM    121  N   ASP A  32      -5.476  -5.464  -8.108  1.00 10.93           N  
ATOM    122  CA  ASP A  32      -5.408  -6.772  -8.869  1.00 14.01           C  
ATOM    123  C   ASP A  32      -5.666  -7.912  -7.912  1.00 14.04           C  
ATOM    124  O   ASP A  32      -6.353  -8.838  -8.202  1.00 13.39           O  
ATOM    125  N   LYS A  33      -5.174  -7.859  -6.695  1.00 14.22           N  
ATOM    126  CA  LYS A  33      -5.461  -8.944  -5.760  1.00 14.00           C  
ATOM    127  C   LYS A  33      -6.852  -8.877  -5.151  1.00 12.37           C  
ATOM    128  O   LYS A  33      -7.589  -9.859  -5.132  1.00 12.17           O  
ATOM    129  N   GLU A  34      -7.200  -7.707  -4.553  1.00 10.11           N  
ATOM    130  CA  GLU A  34      -8.320  -7.562  -3.669  1.00 10.07           C  
ATOM    131  C   GLU A  34      -9.549  -6.975  -4.305  1.00  9.32           C  
ATOM    132  O   GLU A  34     -10.689  -7.139  -3.820  1.00 11.61           O  
ATOM    133  N   GLY A  35      -9.452  -6.320  -5.412  1.00  7.22           N  
ATOM    134  CA  GLY A  35     -10.625  -5.754  -6.100  1.00  6.29           C  
ATOM    135  C   GLY A  35     -11.059  -4.435  -5.510  1.00  6.93           C  
ATOM    136  O   GLY A  35     -12.088  -3.842  -5.908  1.00  7.41           O  
ATOM    137  N   ILE A  36     -10.323  -3.908  -4.563  1.00  5.86           N  
ATOM    138  CA  ILE A  36     -10.615  -2.726  -3.878  1.00  6.07           C  
ATOM    139  C   ILE A  36     -10.052  -1.637  -4.851  1.00  6.36           C  
ATOM    140  O   ILE A  36      -8.851  -1.716  -5.138  1.00  6.18           O  
ATOM    141  N   PRO A  37     -10.826  -0.679  -5.450  1.00  8.65           N  
ATOM    142  CA  PRO A  37     -10.240   0.398  -6.239  1.00  9.18           C  
ATOM    143  C   PRO A  37      -9.012   1.199  -5.644  1.00  9.85           C  
ATOM    144  O   PRO A  37      -9.007   1.316  -4.425  1.00  8.51           O  
ATOM    145  N   PRO A  38      -8.090   1.782  -6.449  1.00  8.71           N  
ATOM    146  CA  PRO A  38      -6.971   2.465  -5.893  1.00  9.08           C  
ATOM    147  C   PRO A  38      -7.326   3.730  -5.177  1.00  9.28           C  
ATOM    148  O   PRO A  38      -6.548   4.084  -4.276  1.00  6.50           O  
ATOM    149  N   ASP A  39      -8.526   4.286  -5.452  1.00 11.20           N  
ATOM    150  CA  ASP A  39      -9.000   5.478  -4.844  1.00 14.96           C  
ATOM    151  C   ASP A  39      -9.932   5.134  -3.666  1.00 13.99           C  
ATOM    152  O   ASP A  39     -10.395   6.081  -2.998  1.00 13.75           O  
ATOM    153  N   GLN A  40     -10.168   3.804  -3.304  1.00 11.60           N  
ATOM    154  CA  GLN A  40     -10.902   3.409  -2.099  1.00 10.76           C  
ATOM    155  C   GLN A  40      -9.896   2.958  -1.068  1.00  8.01           C  
ATOM    156  O   GLN A  40     -10.217   2.422  -0.007  1.00  8.96           O  
ATOM    157  N   GLN A  41      -8.636   3.161  -1.298  1.00  6.52           N  
ATOM    158  CA  GLN A  41      -7.533   2.725  -0.460  1.00  3.87           C  
ATOM    159  C   GLN A  41      -6.796   3.834   0.310  1.00  4.79           C  
ATOM    160  O   GLN A  41      -6.466   4.913  -0.237  1.00  6.34           O  
ATOM    161  N   ARG A  42      -6.512   3.653   1.583  1.00  5.73           N  
ATOM    162  CA  ARG A  42      -5.624   4.549   2.382  1.00  6.97           C  
ATOM    163  C   ARG A  42      -4.523   3.658   2.931  1.00  7.15           C  
ATOM    164  O   ARG A  42      -4.836   2.663   3.517  1.00  7.33           O  
ATOM    165  N   LEU A  43      -3.236   3.966   2.589  1.00  4.65           N  
ATOM    166  CA  LEU A  43      -2.183   3.014   2.952  1.00  3.51           C  
ATOM    167  C   LEU A  43      -1.392   3.558   4.070  1.00  5.56           C  
ATOM    168  O   LEU A  43      -0.951   4.681   3.982  1.00  4.19           O  
ATOM    169  N   ILE A  44      -1.224   2.757   5.159  1.00  4.58           N  
ATOM    170  CA  ILE A  44      -0.447   3.086   6.367  1.00  5.55           C  
ATOM    171  C   ILE A  44       0.849   2.262   6.412  1.00  5.46           C  
ATOM    172  O   ILE A  44       0.885   1.122   6.021  1.00  6.04           O  
ATOM    173  N   PHE A  45       1.951   2.824   6.955  1.00  6.75           N  
ATOM    174  CA  PHE A  45       3.200   2.119   7.278  1.00  4.70           C  
ATOM    175  C   PHE A  45       3.763   2.946   8.428  1.00  6.34           C  
ATOM    176  O   PHE A  45       3.706   4.172   8.453  1.00  5.45           O  
ATOM    177  N   ALA A  46       4.245   2.224   9.436  1.00  6.53           N  
ATOM    178  CA  ALA A  46       4.624   2.867  10.682  1.00  7.15           C  
ATOM    179  C   ALA A  46       3.604   3.789  11.373  1.00  9.00           C  
ATOM    180  O   ALA A  46       3.994   4.678  12.107  1.00 11.15           O  
ATOM    181  N   GLY A  47       2.280   3.644  11.205  1.00  9.35           N  
ATOM    182  CA  GLY A  47       1.273   4.535  11.765  1.00 11.68           C  
ATOM    183  C   GLY A  47       1.147   5.807  11.033  1.00 11.14           C  
ATOM    184  O   GLY A  47       0.343   6.662  11.430  1.00 13.93           O  
ATOM    185  N   LYS A  48       1.912   6.029   9.942  1.00 10.47           N  
ATOM    186  CA  LYS A  48       1.832   7.233   9.097  1.00  8.82           C  
ATOM    187  C   LYS A  48       1.225   6.818   7.709  1.00  7.68           C  
ATOM    188  O   LYS A  48       1.282   5.654   7.376  1.00  6.47           O  
ATOM    189  N   GLN A  49       0.635   7.766   6.947  1.00  8.89           N  
ATOM    190  CA  GLN A  49       0.054   7.545   5.607  1.00  7.18           C  
ATOM    191  C   GLN A  49       0.997   7.801   4.462  1.00  8.23           C  
ATOM    192  O   GLN A  49       1.907   8.684   4.478  1.00  9.70           O  
ATOM    193  N   LEU A  50       0.847   7.014   3.320  1.00  6.51           N  
ATOM    194  CA  LEU A  50       1.859   7.086   2.289  1.00  7.41           C  
ATOM    195  C   LEU A  50       1.172   7.667   1.048  1.00  8.27           C  
ATOM    196  O   LEU A  50       0.040   7.353   0.694  1.00  8.34           O  
ATOM    197  N   GLU A  51       1.855   8.614   0.291  1.00  9.43           N  
ATOM    198  CA  GLU A  51       1.213   9.406  -0.717  1.00 11.90           C  
ATOM    199  C   GLU A  51       1.442   8.716  -2.048  1.00 11.49           C  
ATOM    200  O   GLU A  51       2.574   8.392  -2.476  1.00  9.88           O  
ATOM    201  N   ASP A  52       0.371   8.606  -2.864  1.00 12.71           N  
ATOM    202  CA  ASP A  52       0.243   8.038  -4.147  1.00 16.56           C  
ATOM    203  C   ASP A  52       1.502   8.028  -5.115  1.00 15.83           C  
ATOM    204  O   ASP A  52       1.984   7.000  -5.537  1.00 17.21           O  
ATOM    205  N   GLY A  53       1.987   9.261  -5.403  1.00 15.00           N  
ATOM    206  CA  GLY A  53       3.162   9.551  -6.227  1.00 11.77           C  
ATOM    207  C   GLY A  53       4.525   9.293  -5.594  1.00 11.10           C  
ATOM    208  O   GLY A  53       5.500   9.542  -6.240  1.00 11.25           O  
ATOM    209  N   ARG A  54       4.518   8.869  -4.352  1.00  8.53           N  
ATOM    210  CA  ARG A  54       5.807   8.630  -3.648  1.00  9.05           C  
ATOM    211  C   ARG A  54       6.200   7.167  -3.915  1.00  8.96           C  
ATOM    212  O   ARG A  54       5.392   6.336  -4.382  1.00 11.60           O  
ATOM    213  N   THR A  55       7.457   6.796  -3.691  1.00  9.05           N  
ATOM    214  CA  THR A  55       8.027   5.423  -3.850  1.00  9.03           C  
ATOM    215  C   THR A  55       8.306   4.622  -2.585  1.00  8.15           C  
ATOM    216  O   THR A  55       8.267   5.157  -1.454  1.00  5.91           O  
ATOM    217  N   LEU A  56       8.514   3.302  -2.722  1.00  6.91           N  
ATOM    218  CA  LEU A  56       8.814   2.449  -1.556  1.00  8.29           C  
ATOM    219  C   LEU A  56      10.131   2.742  -0.911  1.00  8.05           C  
ATOM    220  O   LEU A  56      10.259   2.758   0.307  1.00 10.17           O  
ATOM    221  N   SER A  57      11.132   3.095  -1.754  1.00  8.92           N  
ATOM    222  CA  SER A  57      12.401   3.499  -1.225  1.00  9.00           C  
ATOM    223  C   SER A  57      12.393   4.913  -0.658  1.00  9.44           C  
ATOM    224  O   SER A  57      13.293   5.298   0.100  1.00 10.91           O  
ATOM    225  N   ASP A  58      11.309   5.653  -0.922  1.00  9.11           N  
ATOM    226  CA  ASP A  58      11.114   6.931  -0.262  1.00  7.91           C  
ATOM    227  C   ASP A  58      10.766   6.741   1.159  1.00  9.12           C  
ATOM    228  O   ASP A  58      11.178   7.481   2.068  1.00  8.61           O  
ATOM    229  N   TYR A  59      10.024   5.658   1.485  1.00  7.97           N  
ATOM    230  CA  TYR A  59       9.728   5.344   2.896  1.00  8.45           C  
ATOM    231  C   TYR A  59      10.752   4.392   3.458  1.00 10.98           C  
ATOM    232  O   TYR A  59      10.747   4.045   4.668  1.00 12.95           O  
ATOM    233  N   ASN A  60      11.789   4.085   2.604  1.00 12.38           N  
ATOM    234  CA  ASN A  60      12.873   3.159   2.944  1.00 13.94           C  
ATOM    235  C   ASN A  60      12.457   1.757   3.307  1.00 14.16           C  
ATOM    236  O   ASN A  60      13.115   1.158   4.157  1.00 14.26           O  
ATOM    237  N   ILE A  61      11.392   1.226   2.655  1.00 11.08           N  
ATOM    238  CA  ILE A  61      10.841  -0.077   2.798  1.00 11.78           C  
ATOM    239  C   ILE A  61      11.843  -1.185   2.374  1.00 13.74           C  
ATOM    240  O   ILE A  61      12.528  -1.189   1.346  1.00 14.60           O  
ATOM    241  N   GLN A  62      11.941  -2.108   3.271  1.00 13.97           N  
ATOM    242  CA  GLN A  62      12.796  -3.297   3.156  1.00 15.52           C  
ATOM    243  C   GLN A  62      11.969  -4.553   2.927  1.00 13.94           C  
ATOM    244  O   GLN A  62      10.803  -4.554   3.213  1.00 12.15           O  
ATOM    245  N   LYS A  63      12.608  -5.740   2.558  1.00 11.73           N  
ATOM    246  CA  LYS A  63      11.988  -6.990   2.276  1.00 11.97           C  
ATOM    247  C   LYS A  63      11.166  -7.569   3.397  1.00 10.41           C  
ATOM    248  O   LYS A  63      11.652  -7.632   4.518  1.00  9.59           O  
ATOM    249  N   GLU A  64       9.930  -8.040   3.209  1.00 10.04           N  
ATOM    250  CA  GLU A  64       9.068  -8.702   4.153  1.00 10.94           C  
ATOM    251  C   GLU A  64       8.660  -7.777   5.317  1.00  9.74           C  
ATOM    252  O   GLU A  64       8.354  -8.189   6.455  1.00  9.42           O  
ATOM    253  N   SER A  65       8.499  -6.423   4.983  1.00  6.85           N  
ATOM    254  CA  SER A  65       8.052  -5.436   5.868  1.00  6.90           C  
ATOM    255  C   SER A  65       6.673  -5.016   5.595  1.00  4.72           C  
ATOM    256  O   SER A  65       6.250  -5.256   4.481  1.00  3.91           O  
ATOM    257  N   THR A  66       5.977  -4.544   6.560  1.00  4.48           N  
ATOM    258  CA  THR A  66       4.540  -4.542   6.558  1.00  3.80           C  
ATOM    259  C   THR A  66       3.946  -3.205   6.233  1.00  4.60           C  
ATOM    260  O   THR A  66       4.079  -2.269   7.029  1.00  5.33           O  
ATOM    261  N   LEU A  67       3.099  -3.187   5.151  1.00  4.17           N  
ATOM    262  CA  LEU A  67       2.184  -2.160   4.779  1.00  3.85           C  
ATOM    263  C   LEU A  67       0.873  -2.512   5.367  1.00  3.80           C  
ATOM    264  O   LEU A  67       0.449  -3.638   5.459  1.00  5.54           O  
ATOM    265  N   HIS A  68       0.150  -1.470   5.800  1.00  2.94           N  
ATOM    266  CA  HIS A  68      -1.160  -1.686   6.464  1.00  4.17           C  
ATOM    267  C   HIS A  68      -2.320  -1.066   5.674  1.00  5.32           C  
ATOM    268  O   HIS A  68      -2.266   0.103   5.319  1.00  7.70           O  
ATOM    269  N   LEU A  69      -3.318  -1.791   5.211  1.00  5.29           N  
ATOM    270  CA  LEU A  69      -4.364  -1.386   4.187  1.00  3.97           C  
ATOM    271  C   LEU A  69      -5.654  -0.929   4.825  1.00  5.07           C  
ATOM    272  O   LEU A  69      -6.195  -1.696   5.608  1.00  4.34           O  
ATOM    273  N   VAL A  70      -6.081   0.312   4.656  1.00  4.29           N  
ATOM    274  CA  VAL A  70      -7.293   0.813   5.235  1.00  6.26           C  
ATOM    275  C   VAL A  70      -8.241   1.133   4.116  1.00  9.22           C  
ATOM    276  O   VAL A  70      -7.814   1.673   3.065  1.00  9.36           O  
TER
ENDMDL
MODEL      3
ATOM      1  N   GLN A   2       9.516  -8.769  -2.081  1.00  9.27           N  
ATOM      2  CA  GLN A   2       8.183  -8.820  -1.467  1.00  9.07           C  
ATOM      3  C   GLN A   2       8.055  -7.739  -0.476  1.00  8.72           C  
ATOM      4  O   GLN A   2       8.940  -7.210   0.197  1.00  8.22           O  
ATOM      5  N   ILE A   3       6.793  -7.375  -0.266  1.00  5.87           N  
ATOM      6  CA  ILE A   3       6.336  -6.541   0.818  1.00  5.07           C  
ATOM      7  C   ILE A   3       5.015  -7.190   1.233  1.00  4.01           C  
ATOM      8  O   ILE A   3       4.379  -7.827   0.433  1.00  4.61           O  
ATOM      9  N   PHE A   4       4.631  -7.001   2.483  1.00  4.55           N  
ATOM     10  CA  PHE A   4       3.425  -7.582   3.064  1.00  4.68           C  
ATOM     11  C   PHE A   4       2.487  -6.464   3.461  1.00  5.30           C  
ATOM     12  O   PHE A   4       2.892  -5.427   4.039  1.00  5.58           O  
ATOM     13  N   VAL A   5       1.191  -6.661   3.103  1.00  4.44           N  
ATOM     14  CA  VAL A   5       0.083  -5.801   3.396  1.00  3.87           C  
ATOM     15  C   VAL A   5      -0.907  -6.494   4.370  1.00  4.93           C  
ATOM     16  O   VAL A   5      -1.439  -7.557   4.085  1.00  6.84           O  
ATOM     17  N   LYS A   6      -1.092  -5.928   5.540  1.00  6.04           N  
ATOM     18  CA  LYS A   6      -2.074  -6.490   6.473  1.00  6.12           C  
ATOM     19  C   LYS A   6      -3.292  -5.664   6.297  1.00  6.57           C  
ATOM     20  O   LYS A   6      -3.239  -4.542   5.882  1.00  5.76           O  
ATOM     21  N   THR A   7      -4.494  -6.210   6.619  1.00  7.41           N  
ATOM     22  CA  THR A   7      -5.802  -5.746   6.123  1.00  7.48           C  
ATOM     23  C   THR A   7      -6.813  -5.649   7.228  1.00  8.75           C  
ATOM     24  O   THR A   7      -6.425  -6.097   8.320  1.00  8.58           O  
ATOM     25  N   LEU A   8      -8.050  -5.243   7.020  1.00  9.84           N  
ATOM     26  CA  LEU A   8      -8.971  -4.931   8.105  1.00 14.15           C  
ATOM     27  C   LEU A   8      -9.262  -6.161   9.008  1.00 17.37           C  
ATOM     28  O   LEU A   8      -9.368  -6.045  10.234  1.00 17.01           O  
ATOM     29  N   THR A   9      -9.359  -7.297   8.399  1.00 18.33           N  
ATOM     30  CA  THR A   9      -9.777  -8.558   8.968  1.00 19.24           C  
ATOM     31  C   THR A   9      -8.567  -9.271   9.657  1.00 19.48           C  
ATOM     32  O   THR A   9      -8.710 -10.291  10.326  1.00 23.14           O  
ATOM     33  N   GLY A  10      -7.309  -8.792   9.524  1.00 19.43           N  
ATOM     34  CA  GLY A  10      -6.043  -9.240  10.089  1.00 18.74           C  
ATOM     35  C   GLY A  10      -5.238 -10.107   9.152  1.00 17.62           C  
ATOM     36  O   GLY A  10      -4.044 -10.360   9.435  1.00 19.74           O  
ATOM     37  N   LYS A  11      -5.886 -10.532   8.023  1.00 13.56           N  
ATOM     38  CA  LYS A  11      -5.294 -11.277   6.921  1.00 11.91           C  
ATOM     39  C   LYS A  11      -4.103 -10.565   6.235  1.00 10.18           C  
ATOM     40  O   LYS A  11      -4.163  -9.373   5.971  1.00  9.10           O  
ATOM     41  N   THR A  12      -3.090 -11.299   5.834  1.00  9.63           N  
ATOM     42  CA  THR A  12      -1.813 -10.713   5.349  1.00  9.85           C  
ATOM     43  C   THR A  12      -1.640 -11.082   3.938  1.00 11.66           C  
ATOM     44  O   THR A  12      -1.464 -12.217   3.552  1.00 12.33           O  
ATOM     45  N   ILE A  13      -1.704 -10.136   3.004  1.00 10.42           N  
ATOM     46  CA  ILE A  13      -1.452 -10.365   1.553  1.00 11.84           C  
ATOM     47  C   ILE A  13      -0.014 -10.063   1.204  1.00 10.55           C  
ATOM     48  O   ILE A  13       0.564  -9.057   1.593  1.00 11.92           O  
ATOM     49  N   THR A  14       0.644 -10.977   0.433  1.00  9.39           N  
ATOM     50  CA  THR A  14       1.995 -10.726  -0.126  1.00  9.63           C  
ATOM     51  C   THR A  14       1.855 -10.025  -1.439  1.00 11.20           C  
ATOM     52  O   THR A  14       0.902 -10.288  -2.194  1.00 11.63           O  
ATOM     53  N   LEU A  15       2.756  -9.079  -1.785  1.00  8.29           N  
ATOM     54  CA  LEU A  15       2.880  -8.549  -3.102  1.00  9.03           C  
ATOM     55  C   LEU A  15       4.337  -8.585  -3.531  1.00  8.59           C  
ATOM     56  O   LEU A  15       5.148  -8.318  -2.702  1.00  7.79           O  
ATOM     57  N   GLU A  16       4.631  -8.900  -4.816  1.00 11.04           N  
ATOM     58  CA  GLU A  16       5.951  -8.882  -5.451  1.00 11.50           C  
ATOM     59  C   GLU A  16       6.094  -7.614  -6.269  1.00 10.13           C  
ATOM     60  O   GLU A  16       5.385  -7.290  -7.213  1.00  9.83           O  
ATOM     61  N   VAL A  17       7.075  -6.749  -5.820  1.00  8.99           N  
ATOM     62  CA  VAL A  17       7.258  -5.401  -6.226  1.00  8.85           C  
ATOM     63  C   VAL A  17       8.695  -5.075  -6.487  1.00  8.04           C  
ATOM     64  O   VAL A  17       9.624  -5.805  -6.013  1.00  8.99           O  
ATOM     65  N   GLU A  18       9.006  -3.923  -7.216  1.00  7.29           N  
ATOM     66  CA  GLU A  18      10.335  -3.356  -7.267  1.00  7.08           C  
ATOM     67  C   GLU A  18      10.388  -2.134  -6.337  1.00  6.45           C  
ATOM     68  O   GLU A  18       9.323  -1.622  -5.905  1.00  5.28           O  
ATOM     69  N   PRO A  19      11.565  -1.691  -5.855  1.00  7.24           N  
ATOM     70  CA  PRO A  19      11.702  -0.719  -4.845  1.00  7.07           C  
ATOM     71  C   PRO A  19      11.560   0.620  -5.425  1.00  6.65           C  
ATOM     72  O   PRO A  19      11.507   1.595  -4.735  1.00  6.37           O  
ATOM     73  N   SER A  20      11.476   0.709  -6.800  1.00  6.80           N  
ATOM     74  CA  SER A  20      11.243   1.925  -7.584  1.00  6.28           C  
ATOM     75  C   SER A  20       9.766   2.063  -7.926  1.00  8.45           C  
ATOM     76  O   SER A  20       9.441   3.124  -8.497  1.00  7.26           O  
ATOM     77  N   ASP A  21       8.851   1.077  -7.590  1.00  7.50           N  
ATOM     78  CA  ASP A  21       7.423   1.272  -7.793  1.00  7.70           C  
ATOM     79  C   ASP A  21       6.957   2.422  -6.841  1.00  7.08           C  
ATOM     80  O   ASP A  21       7.349   2.584  -5.667  1.00  8.11           O  
ATOM     81  N   THR A  22       6.043   3.244  -7.327  1.00  5.37           N  
ATOM     82  CA  THR A  22       5.278   4.178  -6.499  1.00  6.01           C  
ATOM     83  C   THR A  22       4.305   3.438  -5.516  1.00  8.01           C  
ATOM     84  O   THR A  22       3.910   2.313  -5.712  1.00  8.11           O  
ATOM     85  N   ILE A  23       3.802   4.161  -4.504  1.00  8.32           N  
ATOM     86  CA  ILE A  23       2.720   3.729  -3.689  1.00  9.92           C  
ATOM     87  C   ILE A  23       1.472   3.530  -4.478  1.00 10.01           C  
ATOM     88  O   ILE A  23       0.669   2.592  -4.240  1.00  8.71           O  
ATOM     89  N   GLU A  24       1.231   4.480  -5.482  1.00  9.54           N  
ATOM     90  CA  GLU A  24       0.116   4.272  -6.436  1.00 11.81           C  
ATOM     91  C   GLU A  24       0.173   2.965  -7.268  1.00 11.14           C  
ATOM     92  O   GLU A  24      -0.844   2.259  -7.512  1.00 10.62           O  
ATOM     93  N   ASN A  25       1.362   2.564  -7.738  1.00  9.43           N  
ATOM     94  CA  ASN A  25       1.623   1.300  -8.446  1.00 10.96           C  
ATOM     95  C   ASN A  25       1.283   0.142  -7.580  1.00  9.68           C  
ATOM     96  O   ASN A  25       0.648  -0.815  -8.004  1.00  9.33           O  
ATOM     97  N   VAL A  26       1.674   0.200  -6.278  1.00  6.52           N  
ATOM     98  CA  VAL A  26       1.338  -0.785  -5.246  1.00  5.53           C  
ATOM     99  C   VAL A  26      -0.194  -0.858  -5.019  1.00  4.42           C  
ATOM    100  O   VAL A  26      -0.705  -1.936  -4.804  1.00  3.40           O  
ATOM    101  N   LYS A  27      -0.959   0.255  -5.041  1.00  2.64           N  
ATOM    102  CA  LYS A  27      -2.390   0.272  -4.939  1.00  4.14           C  
ATOM    103  C   LYS A  27      -3.075  -0.318  -6.092  1.00  5.58           C  
ATOM    104  O   LYS A  27      -4.056  -1.032  -5.965  1.00  4.11           O  
ATOM    105  N   ALA A  28      -2.645  -0.055  -7.319  1.00  6.61           N  
ATOM    106  CA  ALA A  28      -3.084  -0.775  -8.518  1.00  7.74           C  
ATOM    107  C   ALA A  28      -2.764  -2.265  -8.459  1.00  9.17           C  
ATOM    108  O   ALA A  28      -3.625  -3.014  -8.914  1.00 11.45           O  
ATOM    109  N   LYS A  29      -1.616  -2.661  -7.925  1.00  8.96           N  
ATOM    110  CA  LYS A  29      -1.315  -4.025  -7.729  1.00  7.90           C  
ATOM    111  C   LYS A  29      -2.254  -4.774  -6.760  1.00  6.92           C  
ATOM    112  O   LYS A  29      -2.692  -5.890  -6.943  1.00  6.87           O  
ATOM    113  N   ILE A  30      -2.624  -4.125  -5.696  1.00  4.57           N  
ATOM    114  CA  ILE A  30      -3.726  -4.495  -4.792  1.00  5.58           C  
ATOM    115  C   ILE A  30      -5.021  -4.527  -5.511  1.00  7.26           C  
ATOM    116  O   ILE A  30      -5.859  -5.473  -5.307  1.00  9.46           O  
ATOM    117  N   GLN A  31      -5.314  -3.598  -6.460  1.00  7.06           N  
ATOM    118  CA  GLN A  31      -6.531  -3.668  -7.214  1.00  8.67           C  
ATOM    119  C   GLN A  31      -6.473  -4.856  -8.202  1.00 10.90           C  
ATOM    120  O   GLN A  31      -7.490  -5.455  -8.378  1.00  9.63           O  
ATOM    121  N   ASP A  32      -5.280  -5.267  -8.756  1.00 10.93           N  
ATOM    122  CA  ASP A  32      -5.122  -6.527  -9.492  1.00 14.01           C  
ATOM    123  C   ASP A  32      -5.341  -7.813  -8.671  1.00 14.04           C  
ATOM    124  O   ASP A  32      -6.106  -8.699  -9.044  1.00 13.39           O  
ATOM    125  N   LYS A  33      -4.781  -7.931  -7.442  1.00 14.22           N  
ATOM    126  CA  LYS A  33      -5.046  -9.034  -6.563  1.00 14.00           C  
ATOM    127  C   LYS A  33      -6.336  -9.126  -5.823  1.00 12.37           C  
ATOM    128  O   LYS A  33      -6.954 -10.175  -5.763  1.00 12.17           O  
ATOM    129  N   GLU A  34      -6.759  -7.954  -5.281  1.00 10.11           N  
ATOM    130  CA  GLU A  34      -7.891  -7.944  -4.348  1.00 10.07           C  
ATOM    131  C   GLU A  34      -9.093  -7.207  -4.998  1.00  9.32           C  
ATOM    132  O   GLU A  34     -10.151  -7.153  -4.384  1.00 11.61           O  
ATOM    133  N   GLY A  35      -8.965  -6.573  -6.178  1.00  7.22           N  
ATOM    134  CA  GLY A  35     -10.154  -6.069  -6.879  1.00  6.29           C  
ATOM    135  C   GLY A  35     -10.620  -4.742  -6.513  1.00  6.93           C  
ATOM    136  O   GLY A  35     -11.615  -4.207  -7.070  1.00  7.41           O  
ATOM    137  N   ILE A  36      -9.921  -4.061  -5.544  1.00  5.86           N  
ATOM    138  CA  ILE A  36     -10.417  -2.765  -4.925  1.00  6.07           C  
ATOM    139  C   ILE A  36      -9.843  -1.566  -5.605  1.00  6.36           C  
ATOM    140  O   ILE A  36      -8.585  -1.443  -5.656  1.00  6.18           O  
ATOM    141  N   PRO A  37     -10.578  -0.598  -6.130  1.00  8.65           N  
ATOM    142  CA  PRO A  37      -9.986   0.618  -6.722  1.00  9.18           C  
ATOM    143  C   PRO A  37      -9.003   1.424  -5.850  1.00  9.85           C  
ATOM    144  O   PRO A  37      -9.213   1.547  -4.643  1.00  8.51           O  
ATOM    145  N   PRO A  38      -7.870   2.050  -6.337  1.00  8.71           N  
ATOM    146  CA  PRO A  38      -6.958   2.906  -5.571  1.00  9.08           C  
ATOM    147  C   PRO A  38      -7.541   4.016  -4.786  1.00  9.28           C  
ATOM    148  O   PRO A  38      -6.871   4.502  -3.867  1.00  6.50           O  
ATOM    149  N   ASP A  39      -8.661   4.642  -5.155  1.00 11.20           N  
ATOM    150  CA  ASP A  39      -9.119   5.843  -4.520  1.00 14.96           C  
ATOM    151  C   ASP A  39      -9.947   5.507  -3.270  1.00 13.99           C  
ATOM    152  O   ASP A  39     -10.454   6.346  -2.557  1.00 13.75           O  
ATOM    153  N   GLN A  40     -10.084   4.178  -2.983  1.00 11.60           N  
ATOM    154  CA  GLN A  40     -10.796   3.613  -1.910  1.00 10.76           C  
ATOM    155  C   GLN A  40      -9.885   2.987  -0.864  1.00  8.01           C  
ATOM    156  O   GLN A  40     -10.374   2.581   0.160  1.00  8.96           O  
ATOM    157  N   GLN A  41      -8.599   3.034  -1.070  1.00  6.52           N  
ATOM    158  CA  GLN A  41      -7.622   2.442  -0.267  1.00  3.87           C  
ATOM    159  C   GLN A  41      -6.847   3.537   0.507  1.00  4.79           C  
ATOM    160  O   GLN A  41      -6.499   4.569  -0.040  1.00  6.34           O  
ATOM    161  N   ARG A  42      -6.367   3.266   1.756  1.00  5.73           N  
ATOM    162  CA  ARG A  42      -5.317   4.008   2.445  1.00  6.97           C  
ATOM    163  C   ARG A  42      -4.224   3.074   2.888  1.00  7.15           C  
ATOM    164  O   ARG A  42      -4.472   2.085   3.514  1.00  7.33           O  
ATOM    165  N   LEU A  43      -2.983   3.372   2.520  1.00  4.65           N  
ATOM    166  CA  LEU A  43      -1.875   2.554   2.936  1.00  3.51           C  
ATOM    167  C   LEU A  43      -1.103   3.244   4.026  1.00  5.56           C  
ATOM    168  O   LEU A  43      -0.601   4.368   3.824  1.00  4.19           O  
ATOM    169  N   ILE A  44      -0.849   2.582   5.176  1.00  4.58           N  
ATOM    170  CA  ILE A  44      -0.157   3.089   6.400  1.00  5.55           C  
ATOM    171  C   ILE A  44       1.200   2.355   6.599  1.00  5.46           C  
ATOM    172  O   ILE A  44       1.285   1.163   6.742  1.00  6.04           O  
ATOM    173  N   PHE A  45       2.310   3.072   6.724  1.00  6.75           N  
ATOM    174  CA  PHE A  45       3.529   2.430   7.086  1.00  4.70           C  
ATOM    175  C   PHE A  45       4.287   3.409   7.985  1.00  6.34           C  
ATOM    176  O   PHE A  45       4.324   4.596   7.694  1.00  5.45           O  
ATOM    177  N   ALA A  46       4.858   2.941   9.075  1.00  6.53           N  
ATOM    178  CA  ALA A  46       5.535   3.781  10.069  1.00  7.15           C  
ATOM    179  C   ALA A  46       4.702   4.882  10.694  1.00  9.00           C  
ATOM    180  O   ALA A  46       5.252   5.968  10.981  1.00 11.15           O  
ATOM    181  N   GLY A  47       3.450   4.638  10.936  1.00  9.35           N  
ATOM    182  CA  GLY A  47       2.452   5.563  11.545  1.00 11.68           C  
ATOM    183  C   GLY A  47       1.972   6.644  10.572  1.00 11.14           C  
ATOM    184  O   GLY A  47       1.180   7.536  10.947  1.00 13.93           O  
ATOM    185  N   LYS A  48       2.424   6.554   9.351  1.00 10.47           N  
ATOM    186  CA  LYS A  48       2.185   7.604   8.330  1.00  8.82           C  
ATOM    187  C   LYS A  48       1.316   7.151   7.122  1.00  7.68           C  
ATOM    188  O   LYS A  48       1.549   6.142   6.495  1.00  6.47           O  
ATOM    189  N   GLN A  49       0.333   8.041   6.759  1.00  8.89           N  
ATOM    190  CA  GLN A  49      -0.476   8.014   5.554  1.00  7.18           C  
ATOM    191  C   GLN A  49       0.296   8.177   4.247  1.00  8.23           C  
ATOM    192  O   GLN A  49       0.792   9.288   3.962  1.00  9.70           O  
ATOM    193  N   LEU A  50       0.445   7.138   3.328  1.00  6.51           N  
ATOM    194  CA  LEU A  50       1.446   7.203   2.279  1.00  7.41           C  
ATOM    195  C   LEU A  50       0.840   8.067   1.112  1.00  8.27           C  
ATOM    196  O   LEU A  50      -0.346   8.052   0.783  1.00  8.34           O  
ATOM    197  N   GLU A  51       1.662   8.952   0.497  1.00  9.43           N  
ATOM    198  CA  GLU A  51       1.352   9.739  -0.673  1.00 11.90           C  
ATOM    199  C   GLU A  51       1.575   8.979  -1.988  1.00 11.49           C  
ATOM    200  O   GLU A  51       2.656   8.450  -2.164  1.00  9.88           O  
ATOM    201  N   ASP A  52       0.606   9.052  -2.856  1.00 12.71           N  
ATOM    202  CA  ASP A  52       0.457   8.203  -3.997  1.00 16.56           C  
ATOM    203  C   ASP A  52       1.573   8.338  -4.963  1.00 15.83           C  
ATOM    204  O   ASP A  52       2.055   7.340  -5.533  1.00 17.21           O  
ATOM    205  N   GLY A  53       1.992   9.562  -5.256  1.00 15.00           N  
ATOM    206  CA  GLY A  53       3.043   9.957  -6.231  1.00 11.77           C  
ATOM    207  C   GLY A  53       4.434   9.820  -5.699  1.00 11.10           C  
ATOM    208  O   GLY A  53       5.378  10.509  -5.996  1.00 11.25           O  
ATOM    209  N   ARG A  54       4.684   8.819  -4.827  1.00  8.53           N  
ATOM    210  CA  ARG A  54       5.954   8.553  -4.203  1.00  9.05           C  
ATOM    211  C   ARG A  54       6.414   7.124  -4.285  1.00  8.96           C  
ATOM    212  O   ARG A  54       5.618   6.219  -4.314  1.00 11.60           O  
ATOM    213  N   THR A  55       7.759   6.875  -4.445  1.00  9.05           N  
ATOM    214  CA  THR A  55       8.238   5.503  -4.421  1.00  9.03           C  
ATOM    215  C   THR A  55       8.294   4.788  -3.080  1.00  8.15           C  
ATOM    216  O   THR A  55       8.400   5.422  -2.031  1.00  5.91           O  
ATOM    217  N   LEU A  56       8.314   3.428  -3.090  1.00  6.91           N  
ATOM    218  CA  LEU A  56       8.861   2.586  -2.037  1.00  8.29           C  
ATOM    219  C   LEU A  56      10.232   2.995  -1.498  1.00  8.05           C  
ATOM    220  O   LEU A  56      10.443   3.056  -0.273  1.00 10.17           O  
ATOM    221  N   SER A  57      11.230   3.282  -2.360  1.00  8.92           N  
ATOM    222  CA  SER A  57      12.514   3.782  -1.977  1.00  9.00           C  
ATOM    223  C   SER A  57      12.429   5.052  -1.227  1.00  9.44           C  
ATOM    224  O   SER A  57      13.138   5.107  -0.194  1.00 10.91           O  
ATOM    225  N   ASP A  58      11.552   6.014  -1.608  1.00  9.11           N  
ATOM    226  CA  ASP A  58      11.454   7.299  -0.969  1.00  7.91           C  
ATOM    227  C   ASP A  58      10.921   7.242   0.445  1.00  9.12           C  
ATOM    228  O   ASP A  58      11.390   7.926   1.361  1.00  8.61           O  
ATOM    229  N   TYR A  59       9.921   6.325   0.657  1.00  7.97           N  
ATOM    230  CA  TYR A  59       9.266   6.123   1.963  1.00  8.45           C  
ATOM    231  C   TYR A  59       9.836   5.072   2.910  1.00 10.98           C  
ATOM    232  O   TYR A  59       9.291   4.726   3.997  1.00 12.95           O  
ATOM    233  N   ASN A  60      10.960   4.491   2.500  1.00 12.38           N  
ATOM    234  CA  ASN A  60      11.856   3.632   3.278  1.00 13.94           C  
ATOM    235  C   ASN A  60      11.321   2.202   3.434  1.00 14.16           C  
ATOM    236  O   ASN A  60      11.672   1.407   4.330  1.00 14.26           O  
ATOM    237  N   ILE A  61      10.474   1.757   2.427  1.00 11.08           N  
ATOM    238  CA  ILE A  61       9.761   0.470   2.425  1.00 11.78           C  
ATOM    239  C   ILE A  61      10.558  -0.673   1.850  1.00 13.74           C  
ATOM    240  O   ILE A  61      10.560  -0.974   0.663  1.00 14.60           O  
ATOM    241  N   GLN A  62      11.355  -1.381   2.768  1.00 13.97           N  
ATOM    242  CA  GLN A  62      12.264  -2.497   2.394  1.00 15.52           C  
ATOM    243  C   GLN A  62      11.584  -3.880   2.194  1.00 13.94           C  
ATOM    244  O   GLN A  62      10.423  -4.111   2.488  1.00 12.15           O  
ATOM    245  N   LYS A  63      12.301  -4.801   1.538  1.00 11.73           N  
ATOM    246  CA  LYS A  63      12.120  -6.198   1.429  1.00 11.97           C  
ATOM    247  C   LYS A  63      11.690  -6.896   2.695  1.00 10.41           C  
ATOM    248  O   LYS A  63      12.365  -6.855   3.751  1.00  9.59           O  
ATOM    249  N   GLU A  64      10.481  -7.474   2.651  1.00 10.04           N  
ATOM    250  CA  GLU A  64       9.718  -8.041   3.681  1.00 10.94           C  
ATOM    251  C   GLU A  64       9.256  -7.053   4.795  1.00  9.74           C  
ATOM    252  O   GLU A  64       9.077  -7.401   5.948  1.00  9.42           O  
ATOM    253  N   SER A  65       9.002  -5.764   4.372  1.00  6.85           N  
ATOM    254  CA  SER A  65       8.230  -4.760   5.211  1.00  6.90           C  
ATOM    255  C   SER A  65       6.794  -5.031   5.382  1.00  4.72           C  
ATOM    256  O   SER A  65       6.214  -5.630   4.487  1.00  3.91           O  
ATOM    257  N   THR A  66       6.162  -4.707   6.535  1.00  4.48           N  
ATOM    258  CA  THR A  66       4.741  -4.943   6.730  1.00  3.80           C  
ATOM    259  C   THR A  66       4.110  -3.554   6.735  1.00  4.60           C  
ATOM    260  O   THR A  66       4.543  -2.673   7.460  1.00  5.33           O  
ATOM    261  N   LEU A  67       3.098  -3.404   5.921  1.00  4.17           N  
ATOM    262  CA  LEU A  67       2.376  -2.176   5.702  1.00  3.85           C  
ATOM    263  C   LEU A  67       0.954  -2.544   6.061  1.00  3.80           C  
ATOM    264  O   LEU A  67       0.576  -3.739   6.098  1.00  5.54           O  
ATOM    265  N   HIS A  68       0.173  -1.483   6.248  1.00  2.94           N  
ATOM    266  CA  HIS A  68      -1.193  -1.698   6.757  1.00  4.17           C  
ATOM    267  C   HIS A  68      -2.189  -1.072   5.853  1.00  5.32           C  
ATOM    268  O   HIS A  68      -1.983   0.071   5.469  1.00  7.70           O  
ATOM    269  N   LEU A  69      -3.293  -1.797   5.415  1.00  5.29           N  
ATOM    270  CA  LEU A  69      -4.274  -1.250   4.514  1.00  3.97           C  
ATOM    271  C   LEU A  69      -5.555  -0.958   5.348  1.00  5.07           C  
ATOM    272  O   LEU A  69      -6.129  -1.792   6.056  1.00  4.34           O  
ATOM    273  N   VAL A  70      -5.956   0.333   5.359  1.00  4.29           N  
ATOM    274  CA  VAL A  70      -7.269   0.818   5.757  1.00  6.26           C  
ATOM    275  C   VAL A  70      -8.047   0.969   4.422  1.00  9.22           C  
ATOM    276  O   VAL A  70      -7.503   1.261   3.373  1.00  9.36           O  
TER
ENDMDL
MODEL      4
ATOM      1  N   GLN A   2       9.910  -8.540  -2.041  1.00  9.27           N  
ATOM      2  CA  GLN A   2       8.592  -8.768  -1.437  1.00  9.07           C  
ATOM      3  C   GLN A   2       8.335  -7.875  -0.239  1.00  8.72           C  
ATOM      4  O   GLN A   2       9.310  -7.485   0.449  1.00  8.22           O  
ATOM      5  N   ILE A   3       7.063  -7.442  -0.028  1.00  5.87           N  
ATOM      6  CA  ILE A   3       6.589  -6.761   1.244  1.00  5.07           C  
ATOM      7  C   ILE A   3       5.263  -7.339   1.532  1.00  4.01           C  
ATOM      8  O   ILE A   3       4.689  -8.048   0.715  1.00  4.61           O  
ATOM      9  N   PHE A   4       4.738  -7.022   2.716  1.00  4.55           N  
ATOM     10  CA  PHE A   4       3.515  -7.607   3.171  1.00  4.68           C  
ATOM     11  C   PHE A   4       2.501  -6.471   3.377  1.00  5.30           C  
ATOM     12  O   PHE A   4       2.853  -5.430   3.904  1.00  5.58           O  
ATOM     13  N   VAL A   5       1.193  -6.599   2.952  1.00  4.44           N  
ATOM     14  CA  VAL A   5       0.182  -5.586   3.205  1.00  3.87           C  
ATOM     15  C   VAL A   5      -0.895  -6.245   4.015  1.00  4.93           C  
ATOM     16  O   VAL A   5      -1.414  -7.260   3.558  1.00  6.84           O  
ATOM     17  N   LYS A   6      -1.255  -5.698   5.206  1.00  6.04           N  
ATOM     18  CA  LYS A   6      -2.323  -6.206   5.992  1.00  6.12           C  
ATOM     19  C   LYS A   6      -3.602  -5.415   5.843  1.00  6.57           C  
ATOM     20  O   LYS A   6      -3.588  -4.213   6.141  1.00  5.76           O  
ATOM     21  N   THR A   7      -4.665  -6.041   5.283  1.00  7.41           N  
ATOM     22  CA  THR A   7      -5.993  -5.476   5.054  1.00  7.48           C  
ATOM     23  C   THR A   7      -6.827  -4.836   6.216  1.00  8.75           C  
ATOM     24  O   THR A   7      -6.392  -4.876   7.391  1.00  8.58           O  
ATOM     25  N   LEU A   8      -7.987  -4.242   5.902  1.00  9.84           N  
ATOM     26  CA  LEU A   8      -8.763  -3.536   6.911  1.00 14.15           C  
ATOM     27  C   LEU A   8      -9.155  -4.374   8.139  1.00 17.37           C  
ATOM     28  O   LEU A   8      -9.242  -3.865   9.275  1.00 17.01           O  
ATOM     29  N   THR A   9      -9.378  -5.694   7.970  1.00 18.33           N  
ATOM     30  CA  THR A   9      -9.695  -6.741   8.957  1.00 19.24           C  
ATOM     31  C   THR A   9      -8.514  -7.690   9.190  1.00 19.48           C  
ATOM     32  O   THR A   9      -8.649  -8.707   9.877  1.00 23.14           O  
ATOM     33  N   GLY A  10      -7.286  -7.449   8.652  1.00 19.43           N  
ATOM     34  CA  GLY A  10      -6.004  -8.090   9.035  1.00 18.74           C  
ATOM     35  C   GLY A  10      -5.336  -9.003   8.134  1.00 17.62           C  
ATOM     36  O   GLY A  10      -4.317  -9.607   8.506  1.00 19.74           O  
ATOM     37  N   LYS A  11      -5.798  -9.208   6.923  1.00 13.56           N  
ATOM     38  CA  LYS A  11      -5.367 -10.311   6.065  1.00 11.91           C  
ATOM     39  C   LYS A  11      -3.997  -9.976   5.425  1.00 10.18           C  
ATOM     40  O   LYS A  11      -3.803  -8.839   4.865  1.00  9.10           O  
ATOM     41  N   THR A  12      -3.026 -10.901   5.569  1.00  9.63           N  
ATOM     42  CA  THR A  12      -1.668 -10.636   5.065  1.00  9.85           C  
ATOM     43  C   THR A  12      -1.487 -10.933   3.615  1.00 11.66           C  
ATOM     44  O   THR A  12      -1.182 -12.019   3.170  1.00 12.33           O  
ATOM     45  N   ILE A  13      -1.704  -9.964   2.723  1.00 10.42           N  
ATOM     46  CA  ILE A  13      -1.334 -10.053   1.331  1.00 11.84           C  
ATOM     47  C   ILE A  13       0.238  -9.881   1.172  1.00 10.55           C  
ATOM     48  O   ILE A  13       0.815  -8.968   1.702  1.00 11.92           O  
ATOM     49  N   THR A  14       0.980 -10.775   0.470  1.00  9.39           N  
ATOM     50  CA  THR A  14       2.377 -10.551   0.009  1.00  9.63           C  
ATOM     51  C   THR A  14       2.281  -9.979  -1.348  1.00 11.20           C  
ATOM     52  O   THR A  14       1.522 -10.341  -2.185  1.00 11.63           O  
ATOM     53  N   LEU A  15       3.082  -8.966  -1.543  1.00  8.29           N  
ATOM     54  CA  LEU A  15       3.179  -8.191  -2.780  1.00  9.03           C  
ATOM     55  C   LEU A  15       4.615  -8.219  -3.288  1.00  8.59           C  
ATOM     56  O   LEU A  15       5.551  -7.912  -2.589  1.00  7.79           O  
ATOM     57  N   GLU A  16       4.741  -8.498  -4.635  1.00 11.04           N  
ATOM     58  CA  GLU A  16       5.867  -8.287  -5.504  1.00 11.50           C  
ATOM     59  C   GLU A  16       5.997  -6.805  -5.952  1.00 10.13           C  
ATOM     60  O   GLU A  16       5.063  -6.204  -6.540  1.00  9.83           O  
ATOM     61  N   VAL A  17       7.118  -6.170  -5.458  1.00  8.99           N  
ATOM     62  CA  VAL A  17       7.389  -4.765  -5.568  1.00  8.85           C  
ATOM     63  C   VAL A  17       8.846  -4.383  -5.806  1.00  8.04           C  
ATOM     64  O   VAL A  17       9.725  -5.209  -5.729  1.00  8.99           O  
ATOM     65  N   GLU A  18       9.044  -3.098  -6.115  1.00  7.29           N  
ATOM     66  CA  GLU A  18      10.360  -2.555  -6.228  1.00  7.08           C  
ATOM     67  C   GLU A  18      10.340  -1.257  -5.342  1.00  6.45           C  
ATOM     68  O   GLU A  18       9.292  -0.631  -5.081  1.00  5.28           O  
ATOM     69  N   PRO A  19      11.505  -0.730  -4.903  1.00  7.24           N  
ATOM     70  CA  PRO A  19      11.609   0.449  -4.126  1.00  7.07           C  
ATOM     71  C   PRO A  19      11.221   1.623  -4.897  1.00  6.65           C  
ATOM     72  O   PRO A  19      10.778   2.615  -4.304  1.00  6.37           O  
ATOM     73  N   SER A  20      11.362   1.523  -6.216  1.00  6.80           N  
ATOM     74  CA  SER A  20      11.021   2.585  -7.128  1.00  6.28           C  
ATOM     75  C   SER A  20       9.527   2.470  -7.566  1.00  8.45           C  
ATOM     76  O   SER A  20       9.075   3.381  -8.262  1.00  7.26           O  
ATOM     77  N   ASP A  21       8.695   1.520  -7.042  1.00  7.50           N  
ATOM     78  CA  ASP A  21       7.243   1.433  -7.323  1.00  7.70           C  
ATOM     79  C   ASP A  21       6.567   2.491  -6.465  1.00  7.08           C  
ATOM     80  O   ASP A  21       6.818   2.666  -5.294  1.00  8.11           O  
ATOM     81  N   THR A  22       5.692   3.294  -7.072  1.00  5.37           N  
ATOM     82  CA  THR A  22       4.806   4.229  -6.494  1.00  6.01           C  
ATOM     83  C   THR A  22       3.767   3.619  -5.590  1.00  8.01           C  
ATOM     84  O   THR A  22       3.280   2.549  -5.807  1.00  8.11           O  
ATOM     85  N   ILE A  23       3.352   4.338  -4.559  1.00  8.32           N  
ATOM     86  CA  ILE A  23       2.174   3.994  -3.789  1.00  9.92           C  
ATOM     87  C   ILE A  23       0.914   3.838  -4.631  1.00 10.01           C  
ATOM     88  O   ILE A  23       0.049   2.951  -4.383  1.00  8.71           O  
ATOM     89  N   GLU A  24       0.817   4.596  -5.750  1.00  9.54           N  
ATOM     90  CA  GLU A  24      -0.229   4.413  -6.743  1.00 11.81           C  
ATOM     91  C   GLU A  24      -0.170   3.074  -7.416  1.00 11.14           C  
ATOM     92  O   GLU A  24      -1.184   2.460  -7.686  1.00 10.62           O  
ATOM     93  N   ASN A  25       1.087   2.552  -7.619  1.00  9.43           N  
ATOM     94  CA  ASN A  25       1.365   1.293  -8.226  1.00 10.96           C  
ATOM     95  C   ASN A  25       1.080   0.176  -7.228  1.00  9.68           C  
ATOM     96  O   ASN A  25       0.816  -0.960  -7.619  1.00  9.33           O  
ATOM     97  N   VAL A  26       1.277   0.469  -5.866  1.00  6.52           N  
ATOM     98  CA  VAL A  26       1.138  -0.503  -4.731  1.00  5.53           C  
ATOM     99  C   VAL A  26      -0.299  -0.846  -4.738  1.00  4.42           C  
ATOM    100  O   VAL A  26      -0.737  -2.003  -4.751  1.00  3.40           O  
ATOM    101  N   LYS A  27      -1.143   0.175  -4.729  1.00  2.64           N  
ATOM    102  CA  LYS A  27      -2.579   0.053  -4.765  1.00  4.14           C  
ATOM    103  C   LYS A  27      -3.160  -0.670  -5.993  1.00  5.58           C  
ATOM    104  O   LYS A  27      -4.174  -1.413  -5.856  1.00  4.11           O  
ATOM    105  N   ALA A  28      -2.517  -0.453  -7.159  1.00  6.61           N  
ATOM    106  CA  ALA A  28      -2.857  -1.127  -8.431  1.00  7.74           C  
ATOM    107  C   ALA A  28      -2.618  -2.654  -8.486  1.00  9.17           C  
ATOM    108  O   ALA A  28      -3.389  -3.415  -9.057  1.00 11.45           O  
ATOM    109  N   LYS A  29      -1.630  -3.174  -7.738  1.00  8.96           N  
ATOM    110  CA  LYS A  29      -1.367  -4.575  -7.351  1.00  7.90           C  
ATOM    111  C   LYS A  29      -2.478  -5.060  -6.417  1.00  6.92           C  
ATOM    112  O   LYS A  29      -3.022  -6.175  -6.471  1.00  6.87           O  
ATOM    113  N   ILE A  30      -2.899  -4.201  -5.526  1.00  4.57           N  
ATOM    114  CA  ILE A  30      -4.078  -4.487  -4.603  1.00  5.58           C  
ATOM    115  C   ILE A  30      -5.369  -4.578  -5.356  1.00  7.26           C  
ATOM    116  O   ILE A  30      -6.179  -5.529  -5.196  1.00  9.46           O  
ATOM    117  N   GLN A  31      -5.634  -3.650  -6.313  1.00  7.06           N  
ATOM    118  CA  GLN A  31      -6.728  -3.911  -7.277  1.00  8.67           C  
ATOM    119  C   GLN A  31      -6.693  -5.194  -8.096  1.00 10.90           C  
ATOM    120  O   GLN A  31      -7.691  -5.908  -8.228  1.00  9.63           O  
ATOM    121  N   ASP A  32      -5.524  -5.547  -8.621  1.00 10.93           N  
ATOM    122  CA  ASP A  32      -5.235  -6.788  -9.360  1.00 14.01           C  
ATOM    123  C   ASP A  32      -5.536  -8.014  -8.532  1.00 14.04           C  
ATOM    124  O   ASP A  32      -6.099  -9.005  -8.942  1.00 13.39           O  
ATOM    125  N   LYS A  33      -5.033  -7.986  -7.272  1.00 14.22           N  
ATOM    126  CA  LYS A  33      -5.214  -9.158  -6.362  1.00 14.00           C  
ATOM    127  C   LYS A  33      -6.549  -9.285  -5.635  1.00 12.37           C  
ATOM    128  O   LYS A  33      -7.143 -10.358  -5.467  1.00 12.17           O  
ATOM    129  N   GLU A  34      -7.065  -8.158  -5.134  1.00 10.11           N  
ATOM    130  CA  GLU A  34      -8.216  -8.190  -4.195  1.00 10.07           C  
ATOM    131  C   GLU A  34      -9.464  -7.583  -4.737  1.00  9.32           C  
ATOM    132  O   GLU A  34     -10.497  -7.678  -4.059  1.00 11.61           O  
ATOM    133  N   GLY A  35      -9.389  -6.877  -5.857  1.00  7.22           N  
ATOM    134  CA  GLY A  35     -10.488  -6.262  -6.550  1.00  6.29           C  
ATOM    135  C   GLY A  35     -11.004  -4.964  -5.853  1.00  6.93           C  
ATOM    136  O   GLY A  35     -12.103  -4.428  -6.170  1.00  7.41           O  
ATOM    137  N   ILE A  36     -10.272  -4.465  -4.864  1.00  5.86           N  
ATOM    138  CA  ILE A  36     -10.603  -3.199  -4.167  1.00  6.07           C  
ATOM    139  C   ILE A  36     -10.229  -1.966  -5.039  1.00  6.36           C  
ATOM    140  O   ILE A  36      -9.099  -2.044  -5.583  1.00  6.18           O  
ATOM    141  N   PRO A  37     -11.087  -0.892  -5.311  1.00  8.65           N  
ATOM    142  CA  PRO A  37     -10.691   0.285  -6.106  1.00  9.18           C  
ATOM    143  C   PRO A  37      -9.505   1.019  -5.520  1.00  9.85           C  
ATOM    144  O   PRO A  37      -9.620   1.252  -4.317  1.00  8.51           O  
ATOM    145  N   PRO A  38      -8.403   1.428  -6.170  1.00  8.71           N  
ATOM    146  CA  PRO A  38      -7.424   2.301  -5.625  1.00  9.08           C  
ATOM    147  C   PRO A  38      -7.792   3.584  -4.921  1.00  9.28           C  
ATOM    148  O   PRO A  38      -7.013   4.134  -4.164  1.00  6.50           O  
ATOM    149  N   ASP A  39      -8.956   4.108  -5.161  1.00 11.20           N  
ATOM    150  CA  ASP A  39      -9.465   5.349  -4.590  1.00 14.96           C  
ATOM    151  C   ASP A  39     -10.303   4.968  -3.359  1.00 13.99           C  
ATOM    152  O   ASP A  39     -10.795   5.841  -2.713  1.00 13.75           O  
ATOM    153  N   GLN A  40     -10.572   3.660  -3.110  1.00 11.60           N  
ATOM    154  CA  GLN A  40     -11.167   3.307  -1.858  1.00 10.76           C  
ATOM    155  C   GLN A  40     -10.104   2.831  -0.902  1.00  8.01           C  
ATOM    156  O   GLN A  40     -10.375   2.215   0.142  1.00  8.96           O  
ATOM    157  N   GLN A  41      -8.794   3.154  -1.186  1.00  6.52           N  
ATOM    158  CA  GLN A  41      -7.658   2.621  -0.466  1.00  3.87           C  
ATOM    159  C   GLN A  41      -6.793   3.776   0.159  1.00  4.79           C  
ATOM    160  O   GLN A  41      -6.464   4.809  -0.427  1.00  6.34           O  
ATOM    161  N   ARG A  42      -6.372   3.634   1.414  1.00  5.73           N  
ATOM    162  CA  ARG A  42      -5.286   4.431   2.007  1.00  6.97           C  
ATOM    163  C   ARG A  42      -4.325   3.344   2.495  1.00  7.15           C  
ATOM    164  O   ARG A  42      -4.699   2.273   2.982  1.00  7.33           O  
ATOM    165  N   LEU A  43      -3.040   3.609   2.348  1.00  4.65           N  
ATOM    166  CA  LEU A  43      -1.955   2.718   2.665  1.00  3.51           C  
ATOM    167  C   LEU A  43      -1.160   3.320   3.927  1.00  5.56           C  
ATOM    168  O   LEU A  43      -0.863   4.514   3.959  1.00  4.19           O  
ATOM    169  N   ILE A  44      -0.792   2.439   4.895  1.00  4.58           N  
ATOM    170  CA  ILE A  44      -0.219   2.798   6.235  1.00  5.55           C  
ATOM    171  C   ILE A  44       1.116   2.022   6.519  1.00  5.46           C  
ATOM    172  O   ILE A  44       1.158   0.779   6.487  1.00  6.04           O  
ATOM    173  N   PHE A  45       2.230   2.800   6.645  1.00  6.75           N  
ATOM    174  CA  PHE A  45       3.487   2.236   7.062  1.00  4.70           C  
ATOM    175  C   PHE A  45       3.988   2.885   8.338  1.00  6.34           C  
ATOM    176  O   PHE A  45       4.249   4.054   8.422  1.00  5.45           O  
ATOM    177  N   ALA A  46       4.186   2.077   9.385  1.00  6.53           N  
ATOM    178  CA  ALA A  46       4.693   2.495  10.658  1.00  7.15           C  
ATOM    179  C   ALA A  46       4.040   3.631  11.319  1.00  9.00           C  
ATOM    180  O   ALA A  46       4.674   4.552  11.823  1.00 11.15           O  
ATOM    181  N   GLY A  47       2.672   3.622  11.326  1.00  9.35           N  
ATOM    182  CA  GLY A  47       1.817   4.709  11.886  1.00 11.68           C  
ATOM    183  C   GLY A  47       1.668   5.894  10.978  1.00 11.14           C  
ATOM    184  O   GLY A  47       1.048   6.878  11.383  1.00 13.93           O  
ATOM    185  N   LYS A  48       2.280   5.825   9.780  1.00 10.47           N  
ATOM    186  CA  LYS A  48       2.197   6.922   8.828  1.00  8.82           C  
ATOM    187  C   LYS A  48       1.464   6.491   7.561  1.00  7.68           C  
ATOM    188  O   LYS A  48       1.760   5.369   7.043  1.00  6.47           O  
ATOM    189  N   GLN A  49       0.470   7.291   7.105  1.00  8.89           N  
ATOM    190  CA  GLN A  49      -0.219   7.328   5.853  1.00  7.18           C  
ATOM    191  C   GLN A  49       0.755   7.684   4.722  1.00  8.23           C  
ATOM    192  O   GLN A  49       1.703   8.470   4.775  1.00  9.70           O  
ATOM    193  N   LEU A  50       0.554   7.029   3.514  1.00  6.51           N  
ATOM    194  CA  LEU A  50       1.297   7.093   2.356  1.00  7.41           C  
ATOM    195  C   LEU A  50       0.514   7.872   1.237  1.00  8.27           C  
ATOM    196  O   LEU A  50      -0.695   7.845   1.182  1.00  8.34           O  
ATOM    197  N   GLU A  51       1.281   8.608   0.388  1.00  9.43           N  
ATOM    198  CA  GLU A  51       0.721   9.449  -0.712  1.00 11.90           C  
ATOM    199  C   GLU A  51       1.115   8.920  -2.104  1.00 11.49           C  
ATOM    200  O   GLU A  51       2.195   8.427  -2.383  1.00  9.88           O  
ATOM    201  N   ASP A  52       0.106   8.898  -2.990  1.00 12.71           N  
ATOM    202  CA  ASP A  52       0.123   8.184  -4.245  1.00 16.56           C  
ATOM    203  C   ASP A  52       1.376   8.307  -5.184  1.00 15.83           C  
ATOM    204  O   ASP A  52       1.928   7.280  -5.561  1.00 17.21           O  
ATOM    205  N   GLY A  53       1.888   9.480  -5.591  1.00 15.00           N  
ATOM    206  CA  GLY A  53       2.979   9.557  -6.546  1.00 11.77           C  
ATOM    207  C   GLY A  53       4.307   9.402  -5.863  1.00 11.10           C  
ATOM    208  O   GLY A  53       5.356   9.375  -6.470  1.00 11.25           O  
ATOM    209  N   ARG A  54       4.277   9.263  -4.562  1.00  8.53           N  
ATOM    210  CA  ARG A  54       5.456   8.876  -3.784  1.00  9.05           C  
ATOM    211  C   ARG A  54       5.714   7.402  -3.905  1.00  8.96           C  
ATOM    212  O   ARG A  54       4.815   6.665  -4.164  1.00 11.60           O  
ATOM    213  N   THR A  55       7.010   6.929  -3.732  1.00  9.05           N  
ATOM    214  CA  THR A  55       7.598   5.637  -3.823  1.00  9.03           C  
ATOM    215  C   THR A  55       7.784   5.040  -2.480  1.00  8.15           C  
ATOM    216  O   THR A  55       7.785   5.729  -1.481  1.00  5.91           O  
ATOM    217  N   LEU A  56       7.992   3.721  -2.459  1.00  6.91           N  
ATOM    218  CA  LEU A  56       8.455   3.022  -1.289  1.00  8.29           C  
ATOM    219  C   LEU A  56       9.838   3.421  -0.842  1.00  8.05           C  
ATOM    220  O   LEU A  56      10.146   3.319   0.324  1.00 10.17           O  
ATOM    221  N   SER A  57      10.701   3.927  -1.682  1.00  8.92           N  
ATOM    222  CA  SER A  57      11.967   4.537  -1.277  1.00  9.00           C  
ATOM    223  C   SER A  57      11.837   5.766  -0.399  1.00  9.44           C  
ATOM    224  O   SER A  57      12.588   5.932   0.571  1.00 10.91           O  
ATOM    225  N   ASP A  58      10.809   6.644  -0.663  1.00  9.11           N  
ATOM    226  CA  ASP A  58      10.443   7.807   0.096  1.00  7.91           C  
ATOM    227  C   ASP A  58      10.079   7.523   1.539  1.00  9.12           C  
ATOM    228  O   ASP A  58      10.255   8.333   2.423  1.00  8.61           O  
ATOM    229  N   TYR A  59       9.539   6.278   1.756  1.00  7.97           N  
ATOM    230  CA  TYR A  59       9.053   5.849   3.043  1.00  8.45           C  
ATOM    231  C   TYR A  59      10.132   4.899   3.638  1.00 10.98           C  
ATOM    232  O   TYR A  59       9.884   4.431   4.735  1.00 12.95           O  
ATOM    233  N   ASN A  60      11.204   4.580   2.935  1.00 12.38           N  
ATOM    234  CA  ASN A  60      12.267   3.763   3.444  1.00 13.94           C  
ATOM    235  C   ASN A  60      11.818   2.290   3.774  1.00 14.16           C  
ATOM    236  O   ASN A  60      12.200   1.651   4.731  1.00 14.26           O  
ATOM    237  N   ILE A  61      11.073   1.743   2.848  1.00 11.08           N  
ATOM    238  CA  ILE A  61      10.554   0.382   2.977  1.00 11.78           C  
ATOM    239  C   ILE A  61      11.472  -0.524   2.176  1.00 13.74           C  
ATOM    240  O   ILE A  61      11.500  -0.536   0.948  1.00 14.60           O  
ATOM    241  N   GLN A  62      12.311  -1.267   2.952  1.00 13.97           N  
ATOM    242  CA  GLN A  62      13.027  -2.409   2.439  1.00 15.52           C  
ATOM    243  C   GLN A  62      12.099  -3.682   2.266  1.00 13.94           C  
ATOM    244  O   GLN A  62      10.879  -3.714   2.499  1.00 12.15           O  
ATOM    245  N   LYS A  63      12.751  -4.795   1.728  1.00 11.73           N  
ATOM    246  CA  LYS A  63      12.219  -6.164   1.756  1.00 11.97           C  
ATOM    247  C   LYS A  63      11.672  -6.732   3.045  1.00 10.41           C  
ATOM    248  O   LYS A  63      12.251  -6.632   4.151  1.00  9.59           O  
ATOM    249  N   GLU A  64      10.522  -7.402   2.954  1.00 10.04           N  
ATOM    250  CA  GLU A  64       9.882  -8.135   4.006  1.00 10.94           C  
ATOM    251  C   GLU A  64       9.441  -7.237   5.063  1.00  9.74           C  
ATOM    252  O   GLU A  64       9.327  -7.634   6.231  1.00  9.42           O  
ATOM    253  N   SER A  65       9.065  -5.959   4.697  1.00  6.85           N  
ATOM    254  CA  SER A  65       8.488  -4.960   5.590  1.00  6.90           C  
ATOM    255  C   SER A  65       7.028  -5.199   5.610  1.00  4.72           C  
ATOM    256  O   SER A  65       6.404  -5.538   4.596  1.00  3.91           O  
ATOM    257  N   THR A  66       6.448  -4.984   6.783  1.00  4.48           N  
ATOM    258  CA  THR A  66       4.994  -5.058   6.920  1.00  3.80           C  
ATOM    259  C   THR A  66       4.429  -3.657   6.745  1.00  4.60           C  
ATOM    260  O   THR A  66       4.899  -2.693   7.368  1.00  5.33           O  
ATOM    261  N   LEU A  67       3.344  -3.539   5.974  1.00  4.17           N  
ATOM    262  CA  LEU A  67       2.487  -2.364   5.763  1.00  3.85           C  
ATOM    263  C   LEU A  67       1.083  -2.700   6.105  1.00  3.80           C  
ATOM    264  O   LEU A  67       0.713  -3.890   6.113  1.00  5.54           O  
ATOM    265  N   HIS A  68       0.214  -1.725   6.285  1.00  2.94           N  
ATOM    266  CA  HIS A  68      -1.205  -1.927   6.529  1.00  4.17           C  
ATOM    267  C   HIS A  68      -1.977  -1.201   5.443  1.00  5.32           C  
ATOM    268  O   HIS A  68      -1.416  -0.427   4.627  1.00  7.70           O  
ATOM    269  N   LEU A  69      -3.231  -1.531   5.256  1.00  5.29           N  
ATOM    270  CA  LEU A  69      -4.109  -1.030   4.306  1.00  3.97           C  
ATOM    271  C   LEU A  69      -5.398  -0.812   5.021  1.00  5.07           C  
ATOM    272  O   LEU A  69      -5.928  -1.658   5.676  1.00  4.34           O  
ATOM    273  N   VAL A  70      -5.897   0.479   4.869  1.00  4.29           N  
ATOM    274  CA  VAL A  70      -7.189   0.772   5.437  1.00  6.26           C  
ATOM    275  C   VAL A  70      -8.080   1.406   4.365  1.00  9.22           C  
ATOM    276  O   VAL A  70      -7.733   2.278   3.569  1.00  9.36           O  
TER
ENDMDL
MODEL      5
ATOM      1  N   GLN A   2       9.976  -8.591  -1.877  1.00  9.27           N  
ATOM      2  CA  GLN A   2       8.716  -9.012  -1.313  1.00  9.07           C  
ATOM      3  C   GLN A   2       8.463  -8.166  -0.088  1.00  8.72           C  
ATOM      4  O   GLN A   2       9.283  -8.032   0.834  1.00  8.22           O  
ATOM      5  N   ILE A   3       7.219  -7.714   0.026  1.00  5.87           N  
ATOM      6  CA  ILE A   3       6.637  -7.131   1.192  1.00  5.07           C  
ATOM      7  C   ILE A   3       5.284  -7.771   1.501  1.00  4.01           C  
ATOM      8  O   ILE A   3       4.712  -8.494   0.688  1.00  4.61           O  
ATOM      9  N   PHE A   4       4.736  -7.462   2.688  1.00  4.55           N  
ATOM     10  CA  PHE A   4       3.561  -7.956   3.298  1.00  4.68           C  
ATOM     11  C   PHE A   4       2.653  -6.818   3.664  1.00  5.30           C  
ATOM     12  O   PHE A   4       3.136  -5.728   3.952  1.00  5.58           O  
ATOM     13  N   VAL A   5       1.319  -6.949   3.570  1.00  4.44           N  
ATOM     14  CA  VAL A   5       0.323  -5.923   3.718  1.00  3.87           C  
ATOM     15  C   VAL A   5      -0.841  -6.395   4.558  1.00  4.93           C  
ATOM     16  O   VAL A   5      -1.483  -7.281   4.069  1.00  6.84           O  
ATOM     17  N   LYS A   6      -1.029  -5.781   5.748  1.00  6.04           N  
ATOM     18  CA  LYS A   6      -2.020  -6.172   6.748  1.00  6.12           C  
ATOM     19  C   LYS A   6      -3.348  -5.520   6.451  1.00  6.57           C  
ATOM     20  O   LYS A   6      -3.403  -4.395   5.966  1.00  5.76           O  
ATOM     21  N   THR A   7      -4.461  -6.195   6.643  1.00  7.41           N  
ATOM     22  CA  THR A   7      -5.756  -5.708   6.134  1.00  7.48           C  
ATOM     23  C   THR A   7      -6.746  -6.012   7.220  1.00  8.75           C  
ATOM     24  O   THR A   7      -6.439  -6.675   8.226  1.00  8.58           O  
ATOM     25  N   LEU A   8      -7.934  -5.499   7.099  1.00  9.84           N  
ATOM     26  CA  LEU A   8      -8.970  -5.885   8.065  1.00 14.15           C  
ATOM     27  C   LEU A   8     -10.042  -6.722   7.275  1.00 17.37           C  
ATOM     28  O   LEU A   8     -11.205  -6.804   7.671  1.00 17.01           O  
ATOM     29  N   THR A   9      -9.611  -7.379   6.205  1.00 18.33           N  
ATOM     30  CA  THR A   9     -10.456  -8.065   5.198  1.00 19.24           C  
ATOM     31  C   THR A   9     -10.376  -9.636   5.310  1.00 19.48           C  
ATOM     32  O   THR A   9     -10.984 -10.350   4.462  1.00 23.14           O  
ATOM     33  N   GLY A  10      -9.710 -10.128   6.370  1.00 19.43           N  
ATOM     34  CA  GLY A  10      -9.559 -11.578   6.539  1.00 18.74           C  
ATOM     35  C   GLY A  10      -8.267 -11.983   5.773  1.00 17.62           C  
ATOM     36  O   GLY A  10      -8.231 -13.099   5.196  1.00 19.74           O  
ATOM     37  N   LYS A  11      -7.152 -11.187   5.678  1.00 13.56           N  
ATOM     38  CA  LYS A  11      -6.004 -11.550   4.771  1.00 11.91           C  
ATOM     39  C   LYS A  11      -4.749 -10.825   5.178  1.00 10.18           C  
ATOM     40  O   LYS A  11      -4.845  -9.704   5.601  1.00  9.10           O  
ATOM     41  N   THR A  12      -3.560 -11.394   4.910  1.00  9.63           N  
ATOM     42  CA  THR A  12      -2.297 -10.641   4.821  1.00  9.85           C  
ATOM     43  C   THR A  12      -1.828 -10.824   3.370  1.00 11.66           C  
ATOM     44  O   THR A  12      -1.659 -11.922   2.914  1.00 12.33           O  
ATOM     45  N   ILE A  13      -1.785  -9.703   2.655  1.00 10.42           N  
ATOM     46  CA  ILE A  13      -1.490  -9.762   1.223  1.00 11.84           C  
ATOM     47  C   ILE A  13       0.033  -9.766   1.103  1.00 10.55           C  
ATOM     48  O   ILE A  13       0.769  -8.923   1.559  1.00 11.92           O  
ATOM     49  N   THR A  14       0.596 -10.793   0.481  1.00  9.39           N  
ATOM     50  CA  THR A  14       1.917 -10.793  -0.114  1.00  9.63           C  
ATOM     51  C   THR A  14       2.060 -10.022  -1.435  1.00 11.20           C  
ATOM     52  O   THR A  14       1.213 -10.232  -2.325  1.00 11.63           O  
ATOM     53  N   LEU A  15       3.066  -9.136  -1.577  1.00  8.29           N  
ATOM     54  CA  LEU A  15       3.257  -8.262  -2.765  1.00  9.03           C  
ATOM     55  C   LEU A  15       4.588  -8.446  -3.349  1.00  8.59           C  
ATOM     56  O   LEU A  15       5.600  -8.748  -2.713  1.00  7.79           O  
ATOM     57  N   GLU A  16       4.642  -8.212  -4.682  1.00 11.04           N  
ATOM     58  CA  GLU A  16       5.935  -8.248  -5.401  1.00 11.50           C  
ATOM     59  C   GLU A  16       6.177  -6.919  -6.055  1.00 10.13           C  
ATOM     60  O   GLU A  16       5.403  -6.461  -6.955  1.00  9.83           O  
ATOM     61  N   VAL A  17       7.176  -6.224  -5.597  1.00  8.99           N  
ATOM     62  CA  VAL A  17       7.441  -4.804  -5.888  1.00  8.85           C  
ATOM     63  C   VAL A  17       8.918  -4.486  -6.227  1.00  8.04           C  
ATOM     64  O   VAL A  17       9.856  -5.186  -5.855  1.00  8.99           O  
ATOM     65  N   GLU A  18       9.084  -3.336  -6.930  1.00  7.29           N  
ATOM     66  CA  GLU A  18      10.407  -2.781  -7.182  1.00  7.08           C  
ATOM     67  C   GLU A  18      10.427  -1.442  -6.496  1.00  6.45           C  
ATOM     68  O   GLU A  18       9.372  -0.973  -6.116  1.00  5.28           O  
ATOM     69  N   PRO A  19      11.592  -0.823  -6.138  1.00  7.24           N  
ATOM     70  CA  PRO A  19      11.650   0.241  -5.124  1.00  7.07           C  
ATOM     71  C   PRO A  19      11.197   1.561  -5.829  1.00  6.65           C  
ATOM     72  O   PRO A  19      10.760   2.520  -5.157  1.00  6.37           O  
ATOM     73  N   SER A  20      11.244   1.471  -7.160  1.00  6.80           N  
ATOM     74  CA  SER A  20      10.722   2.498  -8.119  1.00  6.28           C  
ATOM     75  C   SER A  20       9.208   2.427  -8.458  1.00  8.45           C  
ATOM     76  O   SER A  20       8.793   3.227  -9.278  1.00  7.26           O  
ATOM     77  N   ASP A  21       8.433   1.578  -7.781  1.00  7.50           N  
ATOM     78  CA  ASP A  21       6.999   1.502  -7.979  1.00  7.70           C  
ATOM     79  C   ASP A  21       6.440   2.561  -7.023  1.00  7.08           C  
ATOM     80  O   ASP A  21       6.934   2.882  -5.957  1.00  8.11           O  
ATOM     81  N   THR A  22       5.475   3.314  -7.500  1.00  5.37           N  
ATOM     82  CA  THR A  22       4.728   4.256  -6.773  1.00  6.01           C  
ATOM     83  C   THR A  22       3.763   3.661  -5.785  1.00  8.01           C  
ATOM     84  O   THR A  22       3.435   2.501  -5.867  1.00  8.11           O  
ATOM     85  N   ILE A  23       3.240   4.432  -4.844  1.00  8.32           N  
ATOM     86  CA  ILE A  23       2.320   3.941  -3.842  1.00  9.92           C  
ATOM     87  C   ILE A  23       0.983   3.607  -4.536  1.00 10.01           C  
ATOM     88  O   ILE A  23       0.396   2.592  -4.321  1.00  8.71           O  
ATOM     89  N   GLU A  24       0.658   4.391  -5.580  1.00  9.54           N  
ATOM     90  CA  GLU A  24      -0.420   4.083  -6.492  1.00 11.81           C  
ATOM     91  C   GLU A  24      -0.169   2.773  -7.377  1.00 11.14           C  
ATOM     92  O   GLU A  24      -1.063   1.904  -7.532  1.00 10.62           O  
ATOM     93  N   ASN A  25       1.035   2.534  -7.888  1.00  9.43           N  
ATOM     94  CA  ASN A  25       1.393   1.287  -8.563  1.00 10.96           C  
ATOM     95  C   ASN A  25       1.269   0.099  -7.540  1.00  9.68           C  
ATOM     96  O   ASN A  25       0.725  -0.955  -7.870  1.00  9.33           O  
ATOM     97  N   VAL A  26       1.564   0.309  -6.260  1.00  6.52           N  
ATOM     98  CA  VAL A  26       1.222  -0.673  -5.201  1.00  5.53           C  
ATOM     99  C   VAL A  26      -0.275  -0.832  -4.926  1.00  4.42           C  
ATOM    100  O   VAL A  26      -0.803  -1.951  -4.767  1.00  3.40           O  
ATOM    101  N   LYS A  27      -1.067   0.263  -4.923  1.00  2.64           N  
ATOM    102  CA  LYS A  27      -2.540   0.212  -4.905  1.00  4.14           C  
ATOM    103  C   LYS A  27      -3.156  -0.474  -6.157  1.00  5.58           C  
ATOM    104  O   LYS A  27      -4.058  -1.305  -6.035  1.00  4.11           O  
ATOM    105  N   ALA A  28      -2.636  -0.219  -7.366  1.00  6.61           N  
ATOM    106  CA  ALA A  28      -3.019  -0.925  -8.518  1.00  7.74           C  
ATOM    107  C   ALA A  28      -2.723  -2.436  -8.526  1.00  9.17           C  
ATOM    108  O   ALA A  28      -3.593  -3.150  -9.072  1.00 11.45           O  
ATOM    109  N   LYS A  29      -1.564  -2.829  -7.880  1.00  8.96           N  
ATOM    110  CA  LYS A  29      -1.278  -4.232  -7.627  1.00  7.90           C  
ATOM    111  C   LYS A  29      -2.279  -4.880  -6.670  1.00  6.92           C  
ATOM    112  O   LYS A  29      -2.703  -6.035  -6.815  1.00  6.87           O  
ATOM    113  N   ILE A  30      -2.690  -4.137  -5.603  1.00  4.57           N  
ATOM    114  CA  ILE A  30      -3.779  -4.545  -4.724  1.00  5.58           C  
ATOM    115  C   ILE A  30      -5.096  -4.746  -5.443  1.00  7.26           C  
ATOM    116  O   ILE A  30      -5.851  -5.700  -5.204  1.00  9.46           O  
ATOM    117  N   GLN A  31      -5.399  -3.861  -6.391  1.00  7.06           N  
ATOM    118  CA  GLN A  31      -6.560  -3.815  -7.278  1.00  8.67           C  
ATOM    119  C   GLN A  31      -6.678  -5.064  -8.223  1.00 10.90           C  
ATOM    120  O   GLN A  31      -7.720  -5.635  -8.407  1.00  9.63           O  
ATOM    121  N   ASP A  32      -5.468  -5.475  -8.743  1.00 10.93           N  
ATOM    122  CA  ASP A  32      -5.333  -6.663  -9.544  1.00 14.01           C  
ATOM    123  C   ASP A  32      -5.639  -7.974  -8.816  1.00 14.04           C  
ATOM    124  O   ASP A  32      -6.361  -8.844  -9.305  1.00 13.39           O  
ATOM    125  N   LYS A  33      -5.115  -8.111  -7.570  1.00 14.22           N  
ATOM    126  CA  LYS A  33      -5.383  -9.164  -6.652  1.00 14.00           C  
ATOM    127  C   LYS A  33      -6.741  -9.187  -6.009  1.00 12.37           C  
ATOM    128  O   LYS A  33      -7.429 -10.208  -5.975  1.00 12.17           O  
ATOM    129  N   GLU A  34      -7.159  -8.043  -5.488  1.00 10.11           N  
ATOM    130  CA  GLU A  34      -8.326  -7.976  -4.591  1.00 10.07           C  
ATOM    131  C   GLU A  34      -9.564  -7.259  -5.154  1.00  9.32           C  
ATOM    132  O   GLU A  34     -10.717  -7.349  -4.663  1.00 11.61           O  
ATOM    133  N   GLY A  35      -9.293  -6.450  -6.183  1.00  7.22           N  
ATOM    134  CA  GLY A  35     -10.358  -5.678  -6.824  1.00  6.29           C  
ATOM    135  C   GLY A  35     -10.785  -4.402  -6.192  1.00  6.93           C  
ATOM    136  O   GLY A  35     -11.721  -3.742  -6.647  1.00  7.41           O  
ATOM    137  N   ILE A  36     -10.124  -3.936  -5.144  1.00  5.86           N  
ATOM    138  CA  ILE A  36     -10.432  -2.739  -4.432  1.00  6.07           C  
ATOM    139  C   ILE A  36      -9.858  -1.571  -5.234  1.00  6.36           C  
ATOM    140  O   ILE A  36      -8.654  -1.565  -5.566  1.00  6.18           O  
ATOM    141  N   PRO A  37     -10.685  -0.616  -5.710  1.00  8.65           N  
ATOM    142  CA  PRO A  37     -10.252   0.645  -6.353  1.00  9.18           C  
ATOM    143  C   PRO A  37      -9.231   1.474  -5.551  1.00  9.85           C  
ATOM    144  O   PRO A  37      -9.491   1.757  -4.386  1.00  8.51           O  
ATOM    145  N   PRO A  38      -8.012   1.864  -6.031  1.00  8.71           N  
ATOM    146  CA  PRO A  38      -6.982   2.688  -5.396  1.00  9.08           C  
ATOM    147  C   PRO A  38      -7.501   3.826  -4.540  1.00  9.28           C  
ATOM    148  O   PRO A  38      -6.926   4.228  -3.544  1.00  6.50           O  
ATOM    149  N   ASP A  39      -8.569   4.554  -4.982  1.00 11.20           N  
ATOM    150  CA  ASP A  39      -9.139   5.665  -4.295  1.00 14.96           C  
ATOM    151  C   ASP A  39      -9.734   5.328  -2.933  1.00 13.99           C  
ATOM    152  O   ASP A  39      -9.768   6.104  -1.955  1.00 13.75           O  
ATOM    153  N   GLN A  40     -10.186   4.061  -2.819  1.00 11.60           N  
ATOM    154  CA  GLN A  40     -10.749   3.548  -1.536  1.00 10.76           C  
ATOM    155  C   GLN A  40      -9.702   3.028  -0.536  1.00  8.01           C  
ATOM    156  O   GLN A  40      -9.811   2.954   0.688  1.00  8.96           O  
ATOM    157  N   GLN A  41      -8.484   2.774  -1.186  1.00  6.52           N  
ATOM    158  CA  GLN A  41      -7.294   2.330  -0.477  1.00  3.87           C  
ATOM    159  C   GLN A  41      -6.433   3.449   0.082  1.00  4.79           C  
ATOM    160  O   GLN A  41      -5.859   4.245  -0.609  1.00  6.34           O  
ATOM    161  N   ARG A  42      -6.270   3.353   1.383  1.00  5.73           N  
ATOM    162  CA  ARG A  42      -5.385   4.192   2.188  1.00  6.97           C  
ATOM    163  C   ARG A  42      -4.337   3.367   2.821  1.00  7.15           C  
ATOM    164  O   ARG A  42      -4.586   2.414   3.538  1.00  7.33           O  
ATOM    165  N   LEU A  43      -3.035   3.771   2.576  1.00  4.65           N  
ATOM    166  CA  LEU A  43      -1.883   2.931   2.931  1.00  3.51           C  
ATOM    167  C   LEU A  43      -1.055   3.587   4.047  1.00  5.56           C  
ATOM    168  O   LEU A  43      -0.667   4.764   3.949  1.00  4.19           O  
ATOM    169  N   ILE A  44      -0.736   2.819   5.138  1.00  4.58           N  
ATOM    170  CA  ILE A  44      -0.072   3.327   6.314  1.00  5.55           C  
ATOM    171  C   ILE A  44       1.090   2.442   6.662  1.00  5.46           C  
ATOM    172  O   ILE A  44       1.002   1.244   6.638  1.00  6.04           O  
ATOM    173  N   PHE A  45       2.248   3.022   6.994  1.00  6.75           N  
ATOM    174  CA  PHE A  45       3.471   2.368   7.337  1.00  4.70           C  
ATOM    175  C   PHE A  45       4.128   3.176   8.351  1.00  6.34           C  
ATOM    176  O   PHE A  45       4.072   4.439   8.273  1.00  5.45           O  
ATOM    177  N   ALA A  46       4.666   2.560   9.448  1.00  6.53           N  
ATOM    178  CA  ALA A  46       5.479   3.310  10.415  1.00  7.15           C  
ATOM    179  C   ALA A  46       4.746   4.561  11.045  1.00  9.00           C  
ATOM    180  O   ALA A  46       5.350   5.604  11.286  1.00 11.15           O  
ATOM    181  N   GLY A  47       3.450   4.434  11.385  1.00  9.35           N  
ATOM    182  CA  GLY A  47       2.715   5.533  11.965  1.00 11.68           C  
ATOM    183  C   GLY A  47       2.160   6.596  11.050  1.00 11.14           C  
ATOM    184  O   GLY A  47       1.404   7.489  11.512  1.00 13.93           O  
ATOM    185  N   LYS A  48       2.416   6.498   9.750  1.00 10.47           N  
ATOM    186  CA  LYS A  48       1.997   7.599   8.849  1.00  8.82           C  
ATOM    187  C   LYS A  48       1.351   7.043   7.621  1.00  7.68           C  
ATOM    188  O   LYS A  48       1.664   5.923   7.205  1.00  6.47           O  
ATOM    189  N   GLN A  49       0.547   7.911   7.014  1.00  8.89           N  
ATOM    190  CA  GLN A  49      -0.173   7.719   5.752  1.00  7.18           C  
ATOM    191  C   GLN A  49       0.743   8.039   4.593  1.00  8.23           C  
ATOM    192  O   GLN A  49       1.594   8.926   4.647  1.00  9.70           O  
ATOM    193  N   LEU A  50       0.604   7.245   3.476  1.00  6.51           N  
ATOM    194  CA  LEU A  50       1.468   7.302   2.356  1.00  7.41           C  
ATOM    195  C   LEU A  50       0.816   8.041   1.175  1.00  8.27           C  
ATOM    196  O   LEU A  50      -0.376   7.836   0.986  1.00  8.34           O  
ATOM    197  N   GLU A  51       1.644   8.822   0.362  1.00  9.43           N  
ATOM    198  CA  GLU A  51       1.182   9.629  -0.775  1.00 11.90           C  
ATOM    199  C   GLU A  51       1.456   8.984  -2.158  1.00 11.49           C  
ATOM    200  O   GLU A  51       2.444   8.299  -2.380  1.00  9.88           O  
ATOM    201  N   ASP A  52       0.471   9.081  -3.042  1.00 12.71           N  
ATOM    202  CA  ASP A  52       0.210   8.283  -4.264  1.00 16.56           C  
ATOM    203  C   ASP A  52       1.258   8.369  -5.336  1.00 15.83           C  
ATOM    204  O   ASP A  52       1.609   7.411  -6.026  1.00 17.21           O  
ATOM    205  N   GLY A  53       1.860   9.551  -5.511  1.00 15.00           N  
ATOM    206  CA  GLY A  53       2.933   9.800  -6.531  1.00 11.77           C  
ATOM    207  C   GLY A  53       4.310   9.496  -5.972  1.00 11.10           C  
ATOM    208  O   GLY A  53       5.306   9.498  -6.675  1.00 11.25           O  
ATOM    209  N   ARG A  54       4.367   9.178  -4.684  1.00  8.53           N  
ATOM    210  CA  ARG A  54       5.635   8.878  -3.955  1.00  9.05           C  
ATOM    211  C   ARG A  54       6.073   7.390  -4.202  1.00  8.96           C  
ATOM    212  O   ARG A  54       5.240   6.549  -4.602  1.00 11.60           O  
ATOM    213  N   THR A  55       7.358   7.070  -4.077  1.00  9.05           N  
ATOM    214  CA  THR A  55       7.819   5.683  -4.285  1.00  9.03           C  
ATOM    215  C   THR A  55       8.344   5.042  -3.066  1.00  8.15           C  
ATOM    216  O   THR A  55       8.548   5.705  -2.041  1.00  5.91           O  
ATOM    217  N   LEU A  56       8.513   3.732  -3.117  1.00  6.91           N  
ATOM    218  CA  LEU A  56       9.063   2.932  -2.015  1.00  8.29           C  
ATOM    219  C   LEU A  56      10.366   3.331  -1.504  1.00  8.05           C  
ATOM    220  O   LEU A  56      10.626   3.372  -0.289  1.00 10.17           O  
ATOM    221  N   SER A  57      11.286   3.657  -2.402  1.00  8.92           N  
ATOM    222  CA  SER A  57      12.663   4.213  -2.182  1.00  9.00           C  
ATOM    223  C   SER A  57      12.654   5.551  -1.429  1.00  9.44           C  
ATOM    224  O   SER A  57      13.562   5.842  -0.606  1.00 10.91           O  
ATOM    225  N   ASP A  58      11.652   6.471  -1.780  1.00  9.11           N  
ATOM    226  CA  ASP A  58      11.512   7.801  -1.189  1.00  7.91           C  
ATOM    227  C   ASP A  58      11.018   7.732   0.301  1.00  9.12           C  
ATOM    228  O   ASP A  58      11.340   8.631   1.069  1.00  8.61           O  
ATOM    229  N   TYR A  59      10.368   6.658   0.758  1.00  7.97           N  
ATOM    230  CA  TYR A  59      10.076   6.429   2.148  1.00  8.45           C  
ATOM    231  C   TYR A  59      10.945   5.465   2.825  1.00 10.98           C  
ATOM    232  O   TYR A  59      10.723   5.004   3.943  1.00 12.95           O  
ATOM    233  N   ASN A  60      12.031   4.798   2.142  1.00 12.38           N  
ATOM    234  CA  ASN A  60      12.882   3.789   2.813  1.00 13.94           C  
ATOM    235  C   ASN A  60      12.112   2.560   3.220  1.00 14.16           C  
ATOM    236  O   ASN A  60      12.151   2.092   4.388  1.00 14.26           O  
ATOM    237  N   ILE A  61      11.309   2.028   2.301  1.00 11.08           N  
ATOM    238  CA  ILE A  61      10.366   0.985   2.364  1.00 11.78           C  
ATOM    239  C   ILE A  61      11.042  -0.311   1.938  1.00 13.74           C  
ATOM    240  O   ILE A  61      10.965  -0.694   0.802  1.00 14.60           O  
ATOM    241  N   GLN A  62      11.692  -0.989   2.910  1.00 13.97           N  
ATOM    242  CA  GLN A  62      12.725  -1.973   2.608  1.00 15.52           C  
ATOM    243  C   GLN A  62      12.172  -3.376   2.489  1.00 13.94           C  
ATOM    244  O   GLN A  62      11.032  -3.629   2.907  1.00 12.15           O  
ATOM    245  N   LYS A  63      12.984  -4.368   2.032  1.00 11.73           N  
ATOM    246  CA  LYS A  63      12.523  -5.703   1.851  1.00 11.97           C  
ATOM    247  C   LYS A  63      11.950  -6.541   3.061  1.00 10.41           C  
ATOM    248  O   LYS A  63      12.399  -6.415   4.193  1.00  9.59           O  
ATOM    249  N   GLU A  64      10.931  -7.408   2.855  1.00 10.04           N  
ATOM    250  CA  GLU A  64      10.185  -8.025   3.929  1.00 10.94           C  
ATOM    251  C   GLU A  64       9.811  -7.079   5.039  1.00  9.74           C  
ATOM    252  O   GLU A  64      10.069  -7.341   6.200  1.00  9.42           O  
ATOM    253  N   SER A  65       9.293  -5.823   4.604  1.00  6.85           N  
ATOM    254  CA  SER A  65       8.743  -4.763   5.454  1.00  6.90           C  
ATOM    255  C   SER A  65       7.206  -4.932   5.385  1.00  4.72           C  
ATOM    256  O   SER A  65       6.685  -5.691   4.590  1.00  3.91           O  
ATOM    257  N   THR A  66       6.466  -4.412   6.333  1.00  4.48           N  
ATOM    258  CA  THR A  66       5.025  -4.692   6.454  1.00  3.80           C  
ATOM    259  C   THR A  66       4.315  -3.332   6.363  1.00  4.60           C  
ATOM    260  O   THR A  66       4.693  -2.390   7.063  1.00  5.33           O  
ATOM    261  N   LEU A  67       3.309  -3.240   5.427  1.00  4.17           N  
ATOM    262  CA  LEU A  67       2.464  -2.002   5.337  1.00  3.85           C  
ATOM    263  C   LEU A  67       1.089  -2.317   5.867  1.00  3.80           C  
ATOM    264  O   LEU A  67       0.704  -3.494   6.108  1.00  5.54           O  
ATOM    265  N   HIS A  68       0.250  -1.344   6.127  1.00  2.94           N  
ATOM    266  CA  HIS A  68      -1.060  -1.545   6.714  1.00  4.17           C  
ATOM    267  C   HIS A  68      -2.064  -0.970   5.695  1.00  5.32           C  
ATOM    268  O   HIS A  68      -1.852   0.119   5.158  1.00  7.70           O  
ATOM    269  N   LEU A  69      -3.218  -1.565   5.438  1.00  5.29           N  
ATOM    270  CA  LEU A  69      -4.207  -1.125   4.509  1.00  3.97           C  
ATOM    271  C   LEU A  69      -5.527  -0.757   5.209  1.00  5.07           C  
ATOM    272  O   LEU A  69      -6.226  -1.505   5.859  1.00  4.34           O  
ATOM    273  N   VAL A  70      -5.883   0.497   5.105  1.00  4.29           N  
ATOM    274  CA  VAL A  70      -7.089   1.018   5.624  1.00  6.26           C  
ATOM    275  C   VAL A  70      -8.011   1.319   4.481  1.00  9.22           C  
ATOM    276  O   VAL A  70      -7.647   1.919   3.469  1.00  9.36           O  
TER
ENDMDL
MODEL      6
ATOM      1  N   GLN A   2      10.300  -8.611  -1.764  1.00  9.27           N  
ATOM      2  CA  GLN A   2       9.036  -8.961  -1.137  1.00  9.07           C  
ATOM      3  C   GLN A   2       8.533  -8.011  -0.091  1.00  8.72           C  
ATOM      4  O   GLN A   2       9.222  -7.729   0.895  1.00  8.22           O  
ATOM      5  N   ILE A   3       7.340  -7.411  -0.189  1.00  5.87           N  
ATOM      6  CA  ILE A   3       6.698  -6.647   0.904  1.00  5.07           C  
ATOM      7  C   ILE A   3       5.452  -7.386   1.260  1.00  4.01           C  
ATOM      8  O   ILE A   3       4.838  -8.018   0.440  1.00  4.61           O  
ATOM      9  N   PHE A   4       4.961  -7.222   2.542  1.00  4.55           N  
ATOM     10  CA  PHE A   4       3.762  -7.775   3.040  1.00  4.68           C  
ATOM     11  C   PHE A   4       2.819  -6.641   3.316  1.00  5.30           C  
ATOM     12  O   PHE A   4       3.206  -5.613   3.887  1.00  5.58           O  
ATOM     13  N   VAL A   5       1.538  -6.831   2.969  1.00  4.44           N  
ATOM     14  CA  VAL A   5       0.471  -5.882   3.257  1.00  3.87           C  
ATOM     15  C   VAL A   5      -0.580  -6.718   3.866  1.00  4.93           C  
ATOM     16  O   VAL A   5      -0.877  -7.900   3.514  1.00  6.84           O  
ATOM     17  N   LYS A   6      -1.161  -6.138   4.958  1.00  6.04           N  
ATOM     18  CA  LYS A   6      -2.278  -6.747   5.678  1.00  6.12           C  
ATOM     19  C   LYS A   6      -3.547  -6.015   5.316  1.00  6.57           C  
ATOM     20  O   LYS A   6      -3.598  -4.795   5.089  1.00  5.76           O  
ATOM     21  N   THR A   7      -4.610  -6.832   5.059  1.00  7.41           N  
ATOM     22  CA  THR A   7      -5.938  -6.402   4.574  1.00  7.48           C  
ATOM     23  C   THR A   7      -6.796  -5.810   5.662  1.00  8.75           C  
ATOM     24  O   THR A   7      -6.436  -5.712   6.832  1.00  8.58           O  
ATOM     25  N   LEU A   8      -8.005  -5.353   5.334  1.00  9.84           N  
ATOM     26  CA  LEU A   8      -9.013  -4.906   6.279  1.00 14.15           C  
ATOM     27  C   LEU A   8      -9.478  -5.945   7.317  1.00 17.37           C  
ATOM     28  O   LEU A   8      -9.579  -5.712   8.520  1.00 17.01           O  
ATOM     29  N   THR A   9      -9.654  -7.152   6.821  1.00 18.33           N  
ATOM     30  CA  THR A   9      -9.955  -8.315   7.654  1.00 19.24           C  
ATOM     31  C   THR A   9      -8.763  -8.991   8.421  1.00 19.48           C  
ATOM     32  O   THR A   9      -8.807  -9.922   9.245  1.00 23.14           O  
ATOM     33  N   GLY A  10      -7.528  -8.537   8.077  1.00 19.43           N  
ATOM     34  CA  GLY A  10      -6.280  -8.971   8.707  1.00 18.74           C  
ATOM     35  C   GLY A  10      -5.623 -10.124   7.951  1.00 17.62           C  
ATOM     36  O   GLY A  10      -4.664 -10.700   8.480  1.00 19.74           O  
ATOM     37  N   LYS A  11      -6.088 -10.484   6.729  1.00 13.56           N  
ATOM     38  CA  LYS A  11      -5.332 -11.355   5.889  1.00 11.91           C  
ATOM     39  C   LYS A  11      -4.045 -10.723   5.415  1.00 10.18           C  
ATOM     40  O   LYS A  11      -3.940  -9.549   5.108  1.00  9.10           O  
ATOM     41  N   THR A  12      -3.022 -11.519   5.219  1.00  9.63           N  
ATOM     42  CA  THR A  12      -1.798 -10.945   4.740  1.00  9.85           C  
ATOM     43  C   THR A  12      -1.693 -11.193   3.243  1.00 11.66           C  
ATOM     44  O   THR A  12      -1.968 -12.288   2.806  1.00 12.33           O  
ATOM     45  N   ILE A  13      -1.304 -10.249   2.398  1.00 10.42           N  
ATOM     46  CA  ILE A  13      -1.018 -10.315   0.982  1.00 11.84           C  
ATOM     47  C   ILE A  13       0.476  -9.979   0.659  1.00 10.55           C  
ATOM     48  O   ILE A  13       1.047  -9.089   1.298  1.00 11.92           O  
ATOM     49  N   THR A  14       1.107 -10.751  -0.243  1.00  9.39           N  
ATOM     50  CA  THR A  14       2.504 -10.682  -0.526  1.00  9.63           C  
ATOM     51  C   THR A  14       2.668 -10.100  -1.873  1.00 11.20           C  
ATOM     52  O   THR A  14       2.094 -10.568  -2.821  1.00 11.63           O  
ATOM     53  N   LEU A  15       3.428  -9.008  -1.965  1.00  8.29           N  
ATOM     54  CA  LEU A  15       3.586  -8.141  -3.141  1.00  9.03           C  
ATOM     55  C   LEU A  15       5.059  -8.103  -3.606  1.00  8.59           C  
ATOM     56  O   LEU A  15       5.908  -7.672  -2.858  1.00  7.79           O  
ATOM     57  N   GLU A  16       5.391  -8.350  -4.926  1.00 11.04           N  
ATOM     58  CA  GLU A  16       6.801  -8.284  -5.462  1.00 11.50           C  
ATOM     59  C   GLU A  16       6.938  -6.815  -5.947  1.00 10.13           C  
ATOM     60  O   GLU A  16       6.262  -6.455  -6.906  1.00  9.83           O  
ATOM     61  N   VAL A  17       7.767  -5.972  -5.318  1.00  8.99           N  
ATOM     62  CA  VAL A  17       7.953  -4.536  -5.636  1.00  8.85           C  
ATOM     63  C   VAL A  17       9.404  -4.250  -5.657  1.00  8.04           C  
ATOM     64  O   VAL A  17      10.247  -5.062  -5.374  1.00  8.99           O  
ATOM     65  N   GLU A  18       9.754  -2.973  -6.167  1.00  7.29           N  
ATOM     66  CA  GLU A  18      11.128  -2.495  -6.125  1.00  7.08           C  
ATOM     67  C   GLU A  18      11.157  -1.232  -5.197  1.00  6.45           C  
ATOM     68  O   GLU A  18      10.113  -0.677  -4.865  1.00  5.28           O  
ATOM     69  N   PRO A  19      12.310  -0.680  -4.750  1.00  7.24           N  
ATOM     70  CA  PRO A  19      12.396   0.510  -3.911  1.00  7.07           C  
ATOM     71  C   PRO A  19      11.905   1.748  -4.626  1.00  6.65           C  
ATOM     72  O   PRO A  19      11.600   2.794  -4.059  1.00  6.37           O  
ATOM     73  N   SER A  20      11.951   1.714  -5.991  1.00  6.80           N  
ATOM     74  CA  SER A  20      11.635   2.790  -7.001  1.00  6.28           C  
ATOM     75  C   SER A  20      10.222   2.707  -7.486  1.00  8.45           C  
ATOM     76  O   SER A  20       9.858   3.487  -8.351  1.00  7.26           O  
ATOM     77  N   ASP A  21       9.362   1.829  -7.012  1.00  7.50           N  
ATOM     78  CA  ASP A  21       8.009   1.756  -7.445  1.00  7.70           C  
ATOM     79  C   ASP A  21       7.194   2.841  -6.648  1.00  7.08           C  
ATOM     80  O   ASP A  21       7.643   3.337  -5.575  1.00  8.11           O  
ATOM     81  N   THR A  22       6.106   3.321  -7.192  1.00  5.37           N  
ATOM     82  CA  THR A  22       5.390   4.351  -6.438  1.00  6.01           C  
ATOM     83  C   THR A  22       4.350   3.715  -5.584  1.00  8.01           C  
ATOM     84  O   THR A  22       4.007   2.527  -5.777  1.00  8.11           O  
ATOM     85  N   ILE A  23       3.812   4.382  -4.591  1.00  8.32           N  
ATOM     86  CA  ILE A  23       2.648   3.874  -3.809  1.00  9.92           C  
ATOM     87  C   ILE A  23       1.414   3.711  -4.765  1.00 10.01           C  
ATOM     88  O   ILE A  23       0.746   2.691  -4.706  1.00  8.71           O  
ATOM     89  N   GLU A  24       1.207   4.590  -5.776  1.00  9.54           N  
ATOM     90  CA  GLU A  24       0.303   4.422  -6.873  1.00 11.81           C  
ATOM     91  C   GLU A  24       0.389   3.079  -7.632  1.00 11.14           C  
ATOM     92  O   GLU A  24      -0.577   2.334  -7.866  1.00 10.62           O  
ATOM     93  N   ASN A  25       1.605   2.601  -7.911  1.00  9.43           N  
ATOM     94  CA  ASN A  25       1.837   1.204  -8.351  1.00 10.96           C  
ATOM     95  C   ASN A  25       1.440   0.102  -7.348  1.00  9.68           C  
ATOM     96  O   ASN A  25       0.918  -0.954  -7.670  1.00  9.33           O  
ATOM     97  N   VAL A  26       1.624   0.285  -5.995  1.00  6.52           N  
ATOM     98  CA  VAL A  26       1.298  -0.709  -5.001  1.00  5.53           C  
ATOM     99  C   VAL A  26      -0.181  -0.844  -4.939  1.00  4.42           C  
ATOM    100  O   VAL A  26      -0.666  -1.961  -4.822  1.00  3.40           O  
ATOM    101  N   LYS A  27      -0.983   0.287  -5.047  1.00  2.64           N  
ATOM    102  CA  LYS A  27      -2.436   0.176  -4.960  1.00  4.14           C  
ATOM    103  C   LYS A  27      -3.022  -0.554  -6.155  1.00  5.58           C  
ATOM    104  O   LYS A  27      -3.972  -1.337  -6.097  1.00  4.11           O  
ATOM    105  N   ALA A  28      -2.330  -0.410  -7.293  1.00  6.61           N  
ATOM    106  CA  ALA A  28      -2.766  -1.053  -8.523  1.00  7.74           C  
ATOM    107  C   ALA A  28      -2.702  -2.604  -8.511  1.00  9.17           C  
ATOM    108  O   ALA A  28      -3.600  -3.312  -8.945  1.00 11.45           O  
ATOM    109  N   LYS A  29      -1.691  -3.188  -7.871  1.00  8.96           N  
ATOM    110  CA  LYS A  29      -1.639  -4.596  -7.545  1.00  7.90           C  
ATOM    111  C   LYS A  29      -2.583  -5.096  -6.487  1.00  6.92           C  
ATOM    112  O   LYS A  29      -3.162  -6.167  -6.577  1.00  6.87           O  
ATOM    113  N   ILE A  30      -2.902  -4.260  -5.493  1.00  4.57           N  
ATOM    114  CA  ILE A  30      -3.924  -4.545  -4.475  1.00  5.58           C  
ATOM    115  C   ILE A  30      -5.337  -4.533  -5.014  1.00  7.26           C  
ATOM    116  O   ILE A  30      -6.198  -5.344  -4.685  1.00  9.46           O  
ATOM    117  N   GLN A  31      -5.663  -3.652  -5.939  1.00  7.06           N  
ATOM    118  CA  GLN A  31      -6.875  -3.647  -6.721  1.00  8.67           C  
ATOM    119  C   GLN A  31      -7.113  -4.984  -7.424  1.00 10.90           C  
ATOM    120  O   GLN A  31      -8.173  -5.570  -7.460  1.00  9.63           O  
ATOM    121  N   ASP A  32      -6.048  -5.482  -8.078  1.00 10.93           N  
ATOM    122  CA  ASP A  32      -6.058  -6.776  -8.605  1.00 14.01           C  
ATOM    123  C   ASP A  32      -6.353  -7.974  -7.596  1.00 14.04           C  
ATOM    124  O   ASP A  32      -7.204  -8.800  -7.907  1.00 13.39           O  
ATOM    125  N   LYS A  33      -5.655  -7.965  -6.450  1.00 14.22           N  
ATOM    126  CA  LYS A  33      -5.719  -9.034  -5.462  1.00 14.00           C  
ATOM    127  C   LYS A  33      -7.110  -8.996  -4.763  1.00 12.37           C  
ATOM    128  O   LYS A  33      -7.761 -10.006  -4.575  1.00 12.17           O  
ATOM    129  N   GLU A  34      -7.598  -7.761  -4.419  1.00 10.11           N  
ATOM    130  CA  GLU A  34      -8.703  -7.628  -3.473  1.00 10.07           C  
ATOM    131  C   GLU A  34      -9.858  -6.724  -4.032  1.00  9.32           C  
ATOM    132  O   GLU A  34     -10.905  -6.635  -3.383  1.00 11.61           O  
ATOM    133  N   GLY A  35      -9.658  -6.100  -5.225  1.00  7.22           N  
ATOM    134  CA  GLY A  35     -10.775  -5.406  -5.932  1.00  6.29           C  
ATOM    135  C   GLY A  35     -10.924  -4.045  -5.439  1.00  6.93           C  
ATOM    136  O   GLY A  35     -11.583  -3.216  -6.053  1.00  7.41           O  
ATOM    137  N   ILE A  36     -10.314  -3.575  -4.301  1.00  5.86           N  
ATOM    138  CA  ILE A  36     -10.589  -2.254  -3.874  1.00  6.07           C  
ATOM    139  C   ILE A  36      -9.973  -1.199  -4.837  1.00  6.36           C  
ATOM    140  O   ILE A  36      -8.832  -1.380  -5.248  1.00  6.18           O  
ATOM    141  N   PRO A  37     -10.698  -0.161  -5.308  1.00  8.65           N  
ATOM    142  CA  PRO A  37      -9.997   0.880  -6.125  1.00  9.18           C  
ATOM    143  C   PRO A  37      -8.921   1.727  -5.402  1.00  9.85           C  
ATOM    144  O   PRO A  37      -9.100   1.994  -4.188  1.00  8.51           O  
ATOM    145  N   PRO A  38      -7.883   2.249  -6.033  1.00  8.71           N  
ATOM    146  CA  PRO A  38      -6.789   3.070  -5.409  1.00  9.08           C  
ATOM    147  C   PRO A  38      -7.296   4.293  -4.643  1.00  9.28           C  
ATOM    148  O   PRO A  38      -6.611   4.727  -3.640  1.00  6.50           O  
ATOM    149  N   ASP A  39      -8.382   4.945  -5.149  1.00 11.20           N  
ATOM    150  CA  ASP A  39      -9.096   6.021  -4.407  1.00 14.96           C  
ATOM    151  C   ASP A  39      -9.575   5.586  -3.041  1.00 13.99           C  
ATOM    152  O   ASP A  39      -9.622   6.345  -2.038  1.00 13.75           O  
ATOM    153  N   GLN A  40     -10.066   4.349  -2.867  1.00 11.60           N  
ATOM    154  CA  GLN A  40     -10.536   3.889  -1.549  1.00 10.76           C  
ATOM    155  C   GLN A  40      -9.470   3.154  -0.757  1.00  8.01           C  
ATOM    156  O   GLN A  40      -9.685   2.783   0.358  1.00  8.96           O  
ATOM    157  N   GLN A  41      -8.233   2.957  -1.270  1.00  6.52           N  
ATOM    158  CA  GLN A  41      -7.092   2.451  -0.500  1.00  3.87           C  
ATOM    159  C   GLN A  41      -6.301   3.574   0.105  1.00  4.79           C  
ATOM    160  O   GLN A  41      -5.783   4.449  -0.575  1.00  6.34           O  
ATOM    161  N   ARG A  42      -6.128   3.484   1.435  1.00  5.73           N  
ATOM    162  CA  ARG A  42      -5.104   4.223   2.185  1.00  6.97           C  
ATOM    163  C   ARG A  42      -4.115   3.251   2.830  1.00  7.15           C  
ATOM    164  O   ARG A  42      -4.525   2.491   3.677  1.00  7.33           O  
ATOM    165  N   LEU A  43      -2.783   3.260   2.504  1.00  4.65           N  
ATOM    166  CA  LEU A  43      -1.885   2.475   3.374  1.00  3.51           C  
ATOM    167  C   LEU A  43      -1.471   3.284   4.551  1.00  5.56           C  
ATOM    168  O   LEU A  43      -1.304   4.489   4.530  1.00  4.19           O  
ATOM    169  N   ILE A  44      -1.195   2.508   5.617  1.00  4.58           N  
ATOM    170  CA  ILE A  44      -0.635   3.046   6.840  1.00  5.55           C  
ATOM    171  C   ILE A  44       0.678   2.329   7.057  1.00  5.46           C  
ATOM    172  O   ILE A  44       0.813   1.126   7.168  1.00  6.04           O  
ATOM    173  N   PHE A  45       1.801   3.120   7.097  1.00  6.75           N  
ATOM    174  CA  PHE A  45       3.063   2.568   7.605  1.00  4.70           C  
ATOM    175  C   PHE A  45       3.749   3.605   8.444  1.00  6.34           C  
ATOM    176  O   PHE A  45       4.097   4.696   7.945  1.00  5.45           O  
ATOM    177  N   ALA A  46       3.924   3.359   9.754  1.00  6.53           N  
ATOM    178  CA  ALA A  46       4.546   4.194  10.742  1.00  7.15           C  
ATOM    179  C   ALA A  46       3.630   5.298  11.172  1.00  9.00           C  
ATOM    180  O   ALA A  46       4.062   6.391  11.575  1.00 11.15           O  
ATOM    181  N   GLY A  47       2.307   5.013  11.249  1.00  9.35           N  
ATOM    182  CA  GLY A  47       1.290   6.078  11.618  1.00 11.68           C  
ATOM    183  C   GLY A  47       1.084   7.066  10.519  1.00 11.14           C  
ATOM    184  O   GLY A  47       0.401   8.073  10.769  1.00 13.93           O  
ATOM    185  N   LYS A  48       1.617   6.895   9.325  1.00 10.47           N  
ATOM    186  CA  LYS A  48       1.695   7.834   8.174  1.00  8.82           C  
ATOM    187  C   LYS A  48       0.894   7.280   7.044  1.00  7.68           C  
ATOM    188  O   LYS A  48       0.972   6.119   6.700  1.00  6.47           O  
ATOM    189  N   GLN A  49       0.138   8.184   6.372  1.00  8.89           N  
ATOM    190  CA  GLN A  49      -0.679   7.773   5.313  1.00  7.18           C  
ATOM    191  C   GLN A  49       0.088   8.203   4.063  1.00  8.23           C  
ATOM    192  O   GLN A  49       0.516   9.333   3.887  1.00  9.70           O  
ATOM    193  N   LEU A  50       0.323   7.254   3.168  1.00  6.51           N  
ATOM    194  CA  LEU A  50       1.270   7.390   2.129  1.00  7.41           C  
ATOM    195  C   LEU A  50       0.844   7.957   0.789  1.00  8.27           C  
ATOM    196  O   LEU A  50      -0.136   7.482   0.210  1.00  8.34           O  
ATOM    197  N   GLU A  51       1.479   9.079   0.407  1.00  9.43           N  
ATOM    198  CA  GLU A  51       1.134   9.804  -0.834  1.00 11.90           C  
ATOM    199  C   GLU A  51       1.427   9.082  -2.130  1.00 11.49           C  
ATOM    200  O   GLU A  51       2.516   8.543  -2.317  1.00  9.88           O  
ATOM    201  N   ASP A  52       0.412   9.062  -3.012  1.00 12.71           N  
ATOM    202  CA  ASP A  52       0.412   8.244  -4.224  1.00 16.56           C  
ATOM    203  C   ASP A  52       1.574   8.221  -5.175  1.00 15.83           C  
ATOM    204  O   ASP A  52       2.121   7.146  -5.446  1.00 17.21           O  
ATOM    205  N   GLY A  53       2.107   9.376  -5.579  1.00 15.00           N  
ATOM    206  CA  GLY A  53       3.278   9.459  -6.452  1.00 11.77           C  
ATOM    207  C   GLY A  53       4.628   9.291  -5.820  1.00 11.10           C  
ATOM    208  O   GLY A  53       5.666   9.312  -6.434  1.00 11.25           O  
ATOM    209  N   ARG A  54       4.688   9.222  -4.452  1.00  8.53           N  
ATOM    210  CA  ARG A  54       5.940   8.919  -3.746  1.00  9.05           C  
ATOM    211  C   ARG A  54       6.385   7.480  -3.884  1.00  8.96           C  
ATOM    212  O   ARG A  54       5.573   6.583  -4.015  1.00 11.60           O  
ATOM    213  N   THR A  55       7.750   7.255  -3.815  1.00  9.05           N  
ATOM    214  CA  THR A  55       8.275   5.853  -3.821  1.00  9.03           C  
ATOM    215  C   THR A  55       8.397   5.116  -2.503  1.00  8.15           C  
ATOM    216  O   THR A  55       8.457   5.737  -1.425  1.00  5.91           O  
ATOM    217  N   LEU A  56       8.578   3.788  -2.591  1.00  6.91           N  
ATOM    218  CA  LEU A  56       9.032   2.983  -1.456  1.00  8.29           C  
ATOM    219  C   LEU A  56      10.355   3.364  -0.875  1.00  8.05           C  
ATOM    220  O   LEU A  56      10.609   3.265   0.331  1.00 10.17           O  
ATOM    221  N   SER A  57      11.345   3.799  -1.630  1.00  8.92           N  
ATOM    222  CA  SER A  57      12.541   4.383  -1.112  1.00  9.00           C  
ATOM    223  C   SER A  57      12.261   5.696  -0.274  1.00  9.44           C  
ATOM    224  O   SER A  57      12.846   5.815   0.794  1.00 10.91           O  
ATOM    225  N   ASP A  58      11.352   6.632  -0.702  1.00  9.11           N  
ATOM    226  CA  ASP A  58      11.093   7.865   0.120  1.00  7.91           C  
ATOM    227  C   ASP A  58      10.535   7.582   1.504  1.00  9.12           C  
ATOM    228  O   ASP A  58      10.844   8.291   2.442  1.00  8.61           O  
ATOM    229  N   TYR A  59       9.734   6.491   1.555  1.00  7.97           N  
ATOM    230  CA  TYR A  59       8.992   6.120   2.669  1.00  8.45           C  
ATOM    231  C   TYR A  59       9.715   5.087   3.552  1.00 10.98           C  
ATOM    232  O   TYR A  59       9.261   4.619   4.617  1.00 12.95           O  
ATOM    233  N   ASN A  60      11.017   4.759   3.209  1.00 12.38           N  
ATOM    234  CA  ASN A  60      11.820   3.781   3.922  1.00 13.94           C  
ATOM    235  C   ASN A  60      11.212   2.413   4.105  1.00 14.16           C  
ATOM    236  O   ASN A  60      11.209   1.832   5.196  1.00 14.26           O  
ATOM    237  N   ILE A  61      10.591   1.921   3.040  1.00 11.08           N  
ATOM    238  CA  ILE A  61      10.058   0.558   2.956  1.00 11.78           C  
ATOM    239  C   ILE A  61      11.119  -0.295   2.486  1.00 13.74           C  
ATOM    240  O   ILE A  61      11.752  -0.113   1.475  1.00 14.60           O  
ATOM    241  N   GLN A  62      11.211  -1.423   3.146  1.00 13.97           N  
ATOM    242  CA  GLN A  62      12.342  -2.383   2.948  1.00 15.52           C  
ATOM    243  C   GLN A  62      11.823  -3.734   2.699  1.00 13.94           C  
ATOM    244  O   GLN A  62      10.633  -4.030   2.880  1.00 12.15           O  
ATOM    245  N   LYS A  63      12.656  -4.768   2.258  1.00 11.73           N  
ATOM    246  CA  LYS A  63      12.159  -6.135   2.096  1.00 11.97           C  
ATOM    247  C   LYS A  63      11.625  -6.692   3.444  1.00 10.41           C  
ATOM    248  O   LYS A  63      12.239  -6.590   4.479  1.00  9.59           O  
ATOM    249  N   GLU A  64      10.471  -7.360   3.313  1.00 10.04           N  
ATOM    250  CA  GLU A  64       9.749  -8.052   4.372  1.00 10.94           C  
ATOM    251  C   GLU A  64       9.188  -7.159   5.514  1.00  9.74           C  
ATOM    252  O   GLU A  64       8.815  -7.579   6.583  1.00  9.42           O  
ATOM    253  N   SER A  65       9.025  -5.845   5.185  1.00  6.85           N  
ATOM    254  CA  SER A  65       8.212  -4.895   5.922  1.00  6.90           C  
ATOM    255  C   SER A  65       6.706  -5.287   5.913  1.00  4.72           C  
ATOM    256  O   SER A  65       6.230  -5.853   4.908  1.00  3.91           O  
ATOM    257  N   THR A  66       5.950  -5.051   6.985  1.00  4.48           N  
ATOM    258  CA  THR A  66       4.545  -5.329   7.071  1.00  3.80           C  
ATOM    259  C   THR A  66       3.793  -3.964   6.891  1.00  4.60           C  
ATOM    260  O   THR A  66       4.043  -2.991   7.565  1.00  5.33           O  
ATOM    261  N   LEU A  67       2.809  -3.875   5.982  1.00  4.17           N  
ATOM    262  CA  LEU A  67       2.115  -2.626   5.841  1.00  3.85           C  
ATOM    263  C   LEU A  67       0.645  -2.878   6.150  1.00  3.80           C  
ATOM    264  O   LEU A  67       0.088  -3.940   5.933  1.00  5.54           O  
ATOM    265  N   HIS A  68      -0.028  -1.768   6.548  1.00  2.94           N  
ATOM    266  CA  HIS A  68      -1.478  -1.862   6.818  1.00  4.17           C  
ATOM    267  C   HIS A  68      -2.133  -1.262   5.597  1.00  5.32           C  
ATOM    268  O   HIS A  68      -1.799  -0.203   5.162  1.00  7.70           O  
ATOM    269  N   LEU A  69      -3.207  -1.983   5.084  1.00  5.29           N  
ATOM    270  CA  LEU A  69      -4.139  -1.369   4.183  1.00  3.97           C  
ATOM    271  C   LEU A  69      -5.445  -1.001   4.855  1.00  5.07           C  
ATOM    272  O   LEU A  69      -6.028  -1.891   5.453  1.00  4.34           O  
ATOM    273  N   VAL A  70      -5.939   0.262   4.773  1.00  4.29           N  
ATOM    274  CA  VAL A  70      -7.232   0.564   5.327  1.00  6.26           C  
ATOM    275  C   VAL A  70      -8.093   1.284   4.245  1.00  9.22           C  
ATOM    276  O   VAL A  70      -7.647   1.690   3.136  1.00  9.36           O  
TER
ENDMDL
MODEL      7
ATOM      1  N   GLN A   2       9.961  -8.419  -2.020  1.00  9.27           N  
ATOM      2  CA  GLN A   2       8.678  -8.815  -1.383  1.00  9.07           C  
ATOM      3  C   GLN A   2       8.278  -7.807  -0.326  1.00  8.72           C  
ATOM      4  O   GLN A   2       9.158  -7.280   0.322  1.00  8.22           O  
ATOM      5  N   ILE A   3       6.998  -7.549  -0.203  1.00  5.87           N  
ATOM      6  CA  ILE A   3       6.392  -6.820   0.896  1.00  5.07           C  
ATOM      7  C   ILE A   3       5.020  -7.438   1.289  1.00  4.01           C  
ATOM      8  O   ILE A   3       4.415  -8.232   0.543  1.00  4.61           O  
ATOM      9  N   PHE A   4       4.564  -7.073   2.498  1.00  4.55           N  
ATOM     10  CA  PHE A   4       3.357  -7.707   3.069  1.00  4.68           C  
ATOM     11  C   PHE A   4       2.320  -6.638   3.413  1.00  5.30           C  
ATOM     12  O   PHE A   4       2.693  -5.508   3.736  1.00  5.58           O  
ATOM     13  N   VAL A   5       1.020  -6.824   3.221  1.00  4.44           N  
ATOM     14  CA  VAL A   5      -0.045  -5.831   3.379  1.00  3.87           C  
ATOM     15  C   VAL A   5      -1.117  -6.450   4.226  1.00  4.93           C  
ATOM     16  O   VAL A   5      -1.798  -7.348   3.867  1.00  6.84           O  
ATOM     17  N   LYS A   6      -1.232  -5.876   5.409  1.00  6.04           N  
ATOM     18  CA  LYS A   6      -2.162  -6.270   6.435  1.00  6.12           C  
ATOM     19  C   LYS A   6      -3.477  -5.552   6.175  1.00  6.57           C  
ATOM     20  O   LYS A   6      -3.522  -4.394   5.845  1.00  5.76           O  
ATOM     21  N   THR A   7      -4.580  -6.273   6.286  1.00  7.41           N  
ATOM     22  CA  THR A   7      -5.949  -5.789   6.030  1.00  7.48           C  
ATOM     23  C   THR A   7      -6.803  -6.077   7.299  1.00  8.75           C  
ATOM     24  O   THR A   7      -6.452  -6.870   8.151  1.00  8.58           O  
ATOM     25  N   LEU A   8      -7.920  -5.302   7.449  1.00  9.84           N  
ATOM     26  CA  LEU A   8      -8.803  -5.377   8.565  1.00 14.15           C  
ATOM     27  C   LEU A   8     -10.069  -6.086   8.203  1.00 17.37           C  
ATOM     28  O   LEU A   8     -10.947  -6.399   9.031  1.00 17.01           O  
ATOM     29  N   THR A   9     -10.174  -6.356   6.870  1.00 18.33           N  
ATOM     30  CA  THR A   9     -11.250  -7.212   6.280  1.00 19.24           C  
ATOM     31  C   THR A   9     -10.932  -8.667   6.158  1.00 19.48           C  
ATOM     32  O   THR A   9     -11.764  -9.349   5.537  1.00 23.14           O  
ATOM     33  N   GLY A  10      -9.815  -9.169   6.697  1.00 19.43           N  
ATOM     34  CA  GLY A  10      -9.468 -10.629   6.840  1.00 18.74           C  
ATOM     35  C   GLY A  10      -8.558 -11.174   5.757  1.00 17.62           C  
ATOM     36  O   GLY A  10      -9.096 -11.656   4.755  1.00 19.74           O  
ATOM     37  N   LYS A  11      -7.167 -11.056   5.900  1.00 13.56           N  
ATOM     38  CA  LYS A  11      -6.165 -11.300   4.836  1.00 11.91           C  
ATOM     39  C   LYS A  11      -4.896 -10.514   5.183  1.00 10.18           C  
ATOM     40  O   LYS A  11      -4.932  -9.366   5.627  1.00  9.10           O  
ATOM     41  N   THR A  12      -3.689 -11.092   4.841  1.00  9.63           N  
ATOM     42  CA  THR A  12      -2.452 -10.392   4.637  1.00  9.85           C  
ATOM     43  C   THR A  12      -1.971 -10.642   3.211  1.00 11.66           C  
ATOM     44  O   THR A  12      -1.700 -11.771   2.809  1.00 12.33           O  
ATOM     45  N   ILE A  13      -1.867  -9.580   2.431  1.00 10.42           N  
ATOM     46  CA  ILE A  13      -1.442  -9.764   1.010  1.00 11.84           C  
ATOM     47  C   ILE A  13       0.043  -9.716   0.878  1.00 10.55           C  
ATOM     48  O   ILE A  13       0.648  -8.788   1.363  1.00 11.92           O  
ATOM     49  N   THR A  14       0.604 -10.722   0.127  1.00  9.39           N  
ATOM     50  CA  THR A  14       1.924 -10.653  -0.390  1.00  9.63           C  
ATOM     51  C   THR A  14       1.961 -10.011  -1.770  1.00 11.20           C  
ATOM     52  O   THR A  14       1.202 -10.332  -2.721  1.00 11.63           O  
ATOM     53  N   LEU A  15       2.829  -9.008  -1.962  1.00  8.29           N  
ATOM     54  CA  LEU A  15       3.026  -8.323  -3.195  1.00  9.03           C  
ATOM     55  C   LEU A  15       4.494  -8.298  -3.540  1.00  8.59           C  
ATOM     56  O   LEU A  15       5.421  -8.535  -2.730  1.00  7.79           O  
ATOM     57  N   GLU A  16       4.728  -7.982  -4.797  1.00 11.04           N  
ATOM     58  CA  GLU A  16       5.961  -8.020  -5.539  1.00 11.50           C  
ATOM     59  C   GLU A  16       6.180  -6.668  -6.070  1.00 10.13           C  
ATOM     60  O   GLU A  16       5.310  -6.058  -6.679  1.00  9.83           O  
ATOM     61  N   VAL A  17       7.355  -6.103  -5.728  1.00  8.99           N  
ATOM     62  CA  VAL A  17       7.546  -4.693  -5.864  1.00  8.85           C  
ATOM     63  C   VAL A  17       8.981  -4.376  -6.211  1.00  8.04           C  
ATOM     64  O   VAL A  17       9.867  -5.170  -5.990  1.00  8.99           O  
ATOM     65  N   GLU A  18       9.292  -3.118  -6.583  1.00  7.29           N  
ATOM     66  CA  GLU A  18      10.628  -2.606  -6.702  1.00  7.08           C  
ATOM     67  C   GLU A  18      10.883  -1.343  -5.914  1.00  6.45           C  
ATOM     68  O   GLU A  18       9.884  -0.635  -5.677  1.00  5.28           O  
ATOM     69  N   PRO A  19      12.089  -0.901  -5.470  1.00  7.24           N  
ATOM     70  CA  PRO A  19      12.278   0.326  -4.795  1.00  7.07           C  
ATOM     71  C   PRO A  19      11.902   1.592  -5.492  1.00  6.65           C  
ATOM     72  O   PRO A  19      11.686   2.588  -4.836  1.00  6.37           O  
ATOM     73  N   SER A  20      11.778   1.509  -6.826  1.00  6.80           N  
ATOM     74  CA  SER A  20      11.397   2.665  -7.614  1.00  6.28           C  
ATOM     75  C   SER A  20       9.909   2.638  -7.977  1.00  8.45           C  
ATOM     76  O   SER A  20       9.351   3.541  -8.645  1.00  7.26           O  
ATOM     77  N   ASP A  21       9.163   1.576  -7.617  1.00  7.50           N  
ATOM     78  CA  ASP A  21       7.710   1.546  -7.791  1.00  7.70           C  
ATOM     79  C   ASP A  21       7.117   2.581  -6.854  1.00  7.08           C  
ATOM     80  O   ASP A  21       7.627   2.773  -5.748  1.00  8.11           O  
ATOM     81  N   THR A  22       5.997   3.186  -7.266  1.00  5.37           N  
ATOM     82  CA  THR A  22       5.278   4.107  -6.445  1.00  6.01           C  
ATOM     83  C   THR A  22       4.311   3.495  -5.564  1.00  8.01           C  
ATOM     84  O   THR A  22       3.901   2.335  -5.720  1.00  8.11           O  
ATOM     85  N   ILE A  23       3.779   4.290  -4.561  1.00  8.32           N  
ATOM     86  CA  ILE A  23       2.714   3.872  -3.631  1.00  9.92           C  
ATOM     87  C   ILE A  23       1.475   3.566  -4.417  1.00 10.01           C  
ATOM     88  O   ILE A  23       0.911   2.517  -4.178  1.00  8.71           O  
ATOM     89  N   GLU A  24       1.195   4.325  -5.505  1.00  9.54           N  
ATOM     90  CA  GLU A  24       0.204   3.979  -6.581  1.00 11.81           C  
ATOM     91  C   GLU A  24       0.400   2.710  -7.351  1.00 11.14           C  
ATOM     92  O   GLU A  24      -0.578   1.944  -7.593  1.00 10.62           O  
ATOM     93  N   ASN A  25       1.699   2.327  -7.698  1.00  9.43           N  
ATOM     94  CA  ASN A  25       1.961   1.040  -8.175  1.00 10.96           C  
ATOM     95  C   ASN A  25       1.561  -0.096  -7.167  1.00  9.68           C  
ATOM     96  O   ASN A  25       0.904  -1.067  -7.548  1.00  9.33           O  
ATOM     97  N   VAL A  26       1.797   0.054  -5.882  1.00  6.52           N  
ATOM     98  CA  VAL A  26       1.405  -0.913  -4.880  1.00  5.53           C  
ATOM     99  C   VAL A  26      -0.139  -1.010  -4.681  1.00  4.42           C  
ATOM    100  O   VAL A  26      -0.675  -2.088  -4.668  1.00  3.40           O  
ATOM    101  N   LYS A  27      -0.894   0.200  -4.719  1.00  2.64           N  
ATOM    102  CA  LYS A  27      -2.329   0.218  -4.717  1.00  4.14           C  
ATOM    103  C   LYS A  27      -3.030  -0.431  -5.928  1.00  5.58           C  
ATOM    104  O   LYS A  27      -3.968  -1.200  -5.751  1.00  4.11           O  
ATOM    105  N   ALA A  28      -2.503  -0.280  -7.105  1.00  6.61           N  
ATOM    106  CA  ALA A  28      -2.832  -1.048  -8.364  1.00  7.74           C  
ATOM    107  C   ALA A  28      -2.667  -2.543  -8.300  1.00  9.17           C  
ATOM    108  O   ALA A  28      -3.539  -3.271  -8.777  1.00 11.45           O  
ATOM    109  N   LYS A  29      -1.572  -3.065  -7.702  1.00  8.96           N  
ATOM    110  CA  LYS A  29      -1.388  -4.452  -7.427  1.00  7.90           C  
ATOM    111  C   LYS A  29      -2.527  -4.997  -6.515  1.00  6.92           C  
ATOM    112  O   LYS A  29      -3.015  -6.111  -6.687  1.00  6.87           O  
ATOM    113  N   ILE A  30      -2.876  -4.215  -5.444  1.00  4.57           N  
ATOM    114  CA  ILE A  30      -3.915  -4.638  -4.466  1.00  5.58           C  
ATOM    115  C   ILE A  30      -5.247  -4.733  -5.216  1.00  7.26           C  
ATOM    116  O   ILE A  30      -6.048  -5.604  -4.925  1.00  9.46           O  
ATOM    117  N   GLN A  31      -5.515  -3.814  -6.222  1.00  7.06           N  
ATOM    118  CA  GLN A  31      -6.626  -3.913  -7.150  1.00  8.67           C  
ATOM    119  C   GLN A  31      -6.541  -5.165  -7.891  1.00 10.90           C  
ATOM    120  O   GLN A  31      -7.521  -5.911  -7.974  1.00  9.63           O  
ATOM    121  N   ASP A  32      -5.372  -5.492  -8.463  1.00 10.93           N  
ATOM    122  CA  ASP A  32      -5.137  -6.649  -9.266  1.00 14.01           C  
ATOM    123  C   ASP A  32      -5.388  -7.899  -8.484  1.00 14.04           C  
ATOM    124  O   ASP A  32      -5.960  -8.877  -8.971  1.00 13.39           O  
ATOM    125  N   LYS A  33      -5.068  -7.953  -7.166  1.00 14.22           N  
ATOM    126  CA  LYS A  33      -5.391  -9.171  -6.420  1.00 14.00           C  
ATOM    127  C   LYS A  33      -6.802  -9.351  -6.028  1.00 12.37           C  
ATOM    128  O   LYS A  33      -7.458 -10.373  -6.266  1.00 12.17           O  
ATOM    129  N   GLU A  34      -7.364  -8.315  -5.407  1.00 10.11           N  
ATOM    130  CA  GLU A  34      -8.538  -8.417  -4.597  1.00 10.07           C  
ATOM    131  C   GLU A  34      -9.674  -7.410  -5.031  1.00  9.32           C  
ATOM    132  O   GLU A  34     -10.741  -7.303  -4.433  1.00 11.61           O  
ATOM    133  N   GLY A  35      -9.459  -6.750  -6.191  1.00  7.22           N  
ATOM    134  CA  GLY A  35     -10.564  -5.980  -6.853  1.00  6.29           C  
ATOM    135  C   GLY A  35     -10.702  -4.587  -6.360  1.00  6.93           C  
ATOM    136  O   GLY A  35     -11.688  -3.922  -6.753  1.00  7.41           O  
ATOM    137  N   ILE A  36      -9.774  -4.120  -5.483  1.00  5.86           N  
ATOM    138  CA  ILE A  36     -10.004  -2.905  -4.631  1.00  6.07           C  
ATOM    139  C   ILE A  36      -9.582  -1.632  -5.313  1.00  6.36           C  
ATOM    140  O   ILE A  36      -8.372  -1.474  -5.578  1.00  6.18           O  
ATOM    141  N   PRO A  37     -10.452  -0.676  -5.636  1.00  8.65           N  
ATOM    142  CA  PRO A  37     -10.124   0.578  -6.277  1.00  9.18           C  
ATOM    143  C   PRO A  37      -8.940   1.334  -5.669  1.00  9.85           C  
ATOM    144  O   PRO A  37      -8.960   1.484  -4.441  1.00  8.51           O  
ATOM    145  N   PRO A  38      -7.902   1.825  -6.284  1.00  8.71           N  
ATOM    146  CA  PRO A  38      -6.924   2.562  -5.534  1.00  9.08           C  
ATOM    147  C   PRO A  38      -7.332   3.821  -4.765  1.00  9.28           C  
ATOM    148  O   PRO A  38      -6.720   4.108  -3.756  1.00  6.50           O  
ATOM    149  N   ASP A  39      -8.312   4.541  -5.148  1.00 11.20           N  
ATOM    150  CA  ASP A  39      -8.651   5.740  -4.398  1.00 14.96           C  
ATOM    151  C   ASP A  39      -9.444   5.476  -3.129  1.00 13.99           C  
ATOM    152  O   ASP A  39      -9.763   6.405  -2.377  1.00 13.75           O  
ATOM    153  N   GLN A  40      -9.804   4.263  -2.831  1.00 11.60           N  
ATOM    154  CA  GLN A  40     -10.412   3.812  -1.594  1.00 10.76           C  
ATOM    155  C   GLN A  40      -9.352   3.419  -0.653  1.00  8.01           C  
ATOM    156  O   GLN A  40      -9.643   3.125   0.516  1.00  8.96           O  
ATOM    157  N   GLN A  41      -8.064   3.296  -1.124  1.00  6.52           N  
ATOM    158  CA  GLN A  41      -7.047   2.744  -0.296  1.00  3.87           C  
ATOM    159  C   GLN A  41      -6.188   3.767   0.526  1.00  4.79           C  
ATOM    160  O   GLN A  41      -5.699   4.799  -0.002  1.00  6.34           O  
ATOM    161  N   ARG A  42      -5.967   3.379   1.742  1.00  5.73           N  
ATOM    162  CA  ARG A  42      -4.966   3.993   2.516  1.00  6.97           C  
ATOM    163  C   ARG A  42      -3.952   2.928   2.915  1.00  7.15           C  
ATOM    164  O   ARG A  42      -4.275   1.930   3.575  1.00  7.33           O  
ATOM    165  N   LEU A  43      -2.659   3.111   2.581  1.00  4.65           N  
ATOM    166  CA  LEU A  43      -1.621   2.186   3.041  1.00  3.51           C  
ATOM    167  C   LEU A  43      -0.819   2.889   4.094  1.00  5.56           C  
ATOM    168  O   LEU A  43      -0.186   3.934   3.853  1.00  4.19           O  
ATOM    169  N   ILE A  44      -0.847   2.461   5.369  1.00  4.58           N  
ATOM    170  CA  ILE A  44      -0.285   3.171   6.518  1.00  5.55           C  
ATOM    171  C   ILE A  44       1.019   2.463   6.980  1.00  5.46           C  
ATOM    172  O   ILE A  44       1.064   1.292   7.301  1.00  6.04           O  
ATOM    173  N   PHE A  45       2.062   3.260   7.136  1.00  6.75           N  
ATOM    174  CA  PHE A  45       3.396   2.833   7.499  1.00  4.70           C  
ATOM    175  C   PHE A  45       4.101   3.896   8.328  1.00  6.34           C  
ATOM    176  O   PHE A  45       4.121   5.071   7.960  1.00  5.45           O  
ATOM    177  N   ALA A  46       4.569   3.548   9.509  1.00  6.53           N  
ATOM    178  CA  ALA A  46       5.575   4.285  10.313  1.00  7.15           C  
ATOM    179  C   ALA A  46       5.408   5.765  10.506  1.00  9.00           C  
ATOM    180  O   ALA A  46       6.302   6.538  10.153  1.00 11.15           O  
ATOM    181  N   GLY A  47       4.267   6.200  11.049  1.00  9.35           N  
ATOM    182  CA  GLY A  47       3.948   7.584  11.402  1.00 11.68           C  
ATOM    183  C   GLY A  47       3.341   8.366  10.260  1.00 11.14           C  
ATOM    184  O   GLY A  47       3.129   9.567  10.403  1.00 13.93           O  
ATOM    185  N   LYS A  48       3.071   7.710   9.107  1.00 10.47           N  
ATOM    186  CA  LYS A  48       2.603   8.393   7.919  1.00  8.82           C  
ATOM    187  C   LYS A  48       1.490   7.554   7.297  1.00  7.68           C  
ATOM    188  O   LYS A  48       1.311   6.381   7.579  1.00  6.47           O  
ATOM    189  N   GLN A  49       0.669   8.090   6.334  1.00  8.89           N  
ATOM    190  CA  GLN A  49      -0.378   7.263   5.700  1.00  7.18           C  
ATOM    191  C   GLN A  49      -0.159   7.054   4.224  1.00  8.23           C  
ATOM    192  O   GLN A  49      -1.061   6.769   3.509  1.00  9.70           O  
ATOM    193  N   LEU A  50       1.079   7.276   3.815  1.00  6.51           N  
ATOM    194  CA  LEU A  50       1.634   7.311   2.498  1.00  7.41           C  
ATOM    195  C   LEU A  50       0.976   8.203   1.452  1.00  8.27           C  
ATOM    196  O   LEU A  50      -0.099   8.779   1.634  1.00  8.34           O  
ATOM    197  N   GLU A  51       1.715   8.504   0.298  1.00  9.43           N  
ATOM    198  CA  GLU A  51       1.208   9.466  -0.778  1.00 11.90           C  
ATOM    199  C   GLU A  51       1.463   8.916  -2.169  1.00 11.49           C  
ATOM    200  O   GLU A  51       2.582   8.615  -2.430  1.00  9.88           O  
ATOM    201  N   ASP A  52       0.408   8.758  -2.988  1.00 12.71           N  
ATOM    202  CA  ASP A  52       0.342   8.022  -4.220  1.00 16.56           C  
ATOM    203  C   ASP A  52       1.535   8.143  -5.143  1.00 15.83           C  
ATOM    204  O   ASP A  52       2.156   7.176  -5.620  1.00 17.21           O  
ATOM    205  N   GLY A  53       1.889   9.411  -5.430  1.00 15.00           N  
ATOM    206  CA  GLY A  53       2.982   9.620  -6.380  1.00 11.77           C  
ATOM    207  C   GLY A  53       4.377   9.425  -5.911  1.00 11.10           C  
ATOM    208  O   GLY A  53       5.283   9.670  -6.656  1.00 11.25           O  
ATOM    209  N   ARG A  54       4.668   9.039  -4.657  1.00  8.53           N  
ATOM    210  CA  ARG A  54       6.017   8.908  -4.116  1.00  9.05           C  
ATOM    211  C   ARG A  54       6.432   7.468  -4.229  1.00  8.96           C  
ATOM    212  O   ARG A  54       5.636   6.611  -4.583  1.00 11.60           O  
ATOM    213  N   THR A  55       7.683   7.102  -3.942  1.00  9.05           N  
ATOM    214  CA  THR A  55       8.116   5.693  -3.983  1.00  9.03           C  
ATOM    215  C   THR A  55       8.296   4.968  -2.701  1.00  8.15           C  
ATOM    216  O   THR A  55       8.222   5.559  -1.638  1.00  5.91           O  
ATOM    217  N   LEU A  56       8.481   3.652  -2.762  1.00  6.91           N  
ATOM    218  CA  LEU A  56       8.909   2.763  -1.692  1.00  8.29           C  
ATOM    219  C   LEU A  56      10.203   3.266  -0.940  1.00  8.05           C  
ATOM    220  O   LEU A  56      10.186   3.408   0.297  1.00 10.17           O  
ATOM    221  N   SER A  57      11.349   3.583  -1.583  1.00  8.92           N  
ATOM    222  CA  SER A  57      12.639   4.142  -0.969  1.00  9.00           C  
ATOM    223  C   SER A  57      12.460   5.466  -0.303  1.00  9.44           C  
ATOM    224  O   SER A  57      12.968   5.778   0.755  1.00 10.91           O  
ATOM    225  N   ASP A  58      11.643   6.379  -0.870  1.00  9.11           N  
ATOM    226  CA  ASP A  58      11.313   7.676  -0.279  1.00  7.91           C  
ATOM    227  C   ASP A  58      10.765   7.689   1.141  1.00  9.12           C  
ATOM    228  O   ASP A  58      10.887   8.653   1.908  1.00  8.61           O  
ATOM    229  N   TYR A  59      10.138   6.572   1.448  1.00  7.97           N  
ATOM    230  CA  TYR A  59       9.488   6.275   2.660  1.00  8.45           C  
ATOM    231  C   TYR A  59      10.222   5.151   3.436  1.00 10.98           C  
ATOM    232  O   TYR A  59       9.832   4.810   4.543  1.00 12.95           O  
ATOM    233  N   ASN A  60      11.404   4.653   2.925  1.00 12.38           N  
ATOM    234  CA  ASN A  60      12.324   3.670   3.605  1.00 13.94           C  
ATOM    235  C   ASN A  60      11.628   2.359   3.846  1.00 14.16           C  
ATOM    236  O   ASN A  60      11.767   1.651   4.835  1.00 14.26           O  
ATOM    237  N   ILE A  61      10.865   1.916   2.815  1.00 11.08           N  
ATOM    238  CA  ILE A  61      10.247   0.601   2.784  1.00 11.78           C  
ATOM    239  C   ILE A  61      11.296  -0.421   2.245  1.00 13.74           C  
ATOM    240  O   ILE A  61      11.595  -0.636   1.080  1.00 14.60           O  
ATOM    241  N   GLN A  62      11.813  -1.081   3.198  1.00 13.97           N  
ATOM    242  CA  GLN A  62      12.850  -2.100   2.966  1.00 15.52           C  
ATOM    243  C   GLN A  62      12.151  -3.438   2.593  1.00 13.94           C  
ATOM    244  O   GLN A  62      10.944  -3.561   2.752  1.00 12.15           O  
ATOM    245  N   LYS A  63      12.952  -4.470   2.201  1.00 11.73           N  
ATOM    246  CA  LYS A  63      12.418  -5.778   2.019  1.00 11.97           C  
ATOM    247  C   LYS A  63      11.708  -6.500   3.162  1.00 10.41           C  
ATOM    248  O   LYS A  63      12.177  -6.370   4.295  1.00  9.59           O  
ATOM    249  N   GLU A  64      10.573  -7.197   2.834  1.00 10.04           N  
ATOM    250  CA  GLU A  64       9.904  -8.084   3.798  1.00 10.94           C  
ATOM    251  C   GLU A  64       9.228  -7.205   4.892  1.00  9.74           C  
ATOM    252  O   GLU A  64       8.758  -7.721   5.933  1.00  9.42           O  
ATOM    253  N   SER A  65       9.057  -5.928   4.575  1.00  6.85           N  
ATOM    254  CA  SER A  65       8.459  -5.046   5.542  1.00  6.90           C  
ATOM    255  C   SER A  65       6.952  -5.121   5.320  1.00  4.72           C  
ATOM    256  O   SER A  65       6.438  -5.653   4.315  1.00  3.91           O  
ATOM    257  N   THR A  66       6.186  -4.548   6.276  1.00  4.48           N  
ATOM    258  CA  THR A  66       4.772  -4.560   6.299  1.00  3.80           C  
ATOM    259  C   THR A  66       4.275  -3.138   6.154  1.00  4.60           C  
ATOM    260  O   THR A  66       4.799  -2.185   6.734  1.00  5.33           O  
ATOM    261  N   LEU A  67       3.104  -3.058   5.438  1.00  4.17           N  
ATOM    262  CA  LEU A  67       2.228  -1.882   5.300  1.00  3.85           C  
ATOM    263  C   LEU A  67       0.785  -2.182   5.739  1.00  3.80           C  
ATOM    264  O   LEU A  67       0.313  -3.347   5.655  1.00  5.54           O  
ATOM    265  N   HIS A  68       0.053  -1.207   6.244  1.00  2.94           N  
ATOM    266  CA  HIS A  68      -1.253  -1.487   6.761  1.00  4.17           C  
ATOM    267  C   HIS A  68      -2.326  -0.942   5.760  1.00  5.32           C  
ATOM    268  O   HIS A  68      -2.306   0.249   5.514  1.00  7.70           O  
ATOM    269  N   LEU A  69      -3.159  -1.801   5.246  1.00  5.29           N  
ATOM    270  CA  LEU A  69      -4.238  -1.377   4.375  1.00  3.97           C  
ATOM    271  C   LEU A  69      -5.409  -0.990   5.257  1.00  5.07           C  
ATOM    272  O   LEU A  69      -5.919  -1.859   5.961  1.00  4.34           O  
ATOM    273  N   VAL A  70      -5.774   0.266   5.187  1.00  4.29           N  
ATOM    274  CA  VAL A  70      -7.087   0.576   5.761  1.00  6.26           C  
ATOM    275  C   VAL A  70      -7.997   1.008   4.619  1.00  9.22           C  
ATOM    276  O   VAL A  70      -7.567   1.941   3.871  1.00  9.36           O  
TER
ENDMDL
MODEL      8
ATOM      1  N   GLN A   2       9.879  -8.218  -1.764  1.00  9.27           N  
ATOM      2  CA  GLN A   2       8.628  -8.759  -1.148  1.00  9.07           C  
ATOM      3  C   GLN A   2       8.221  -7.797  -0.074  1.00  8.72           C  
ATOM      4  O   GLN A   2       8.925  -7.462   0.895  1.00  8.22           O  
ATOM      5  N   ILE A   3       6.912  -7.349  -0.125  1.00  5.87           N  
ATOM      6  CA  ILE A   3       6.305  -6.584   0.985  1.00  5.07           C  
ATOM      7  C   ILE A   3       5.022  -7.322   1.379  1.00  4.01           C  
ATOM      8  O   ILE A   3       4.501  -8.099   0.580  1.00  4.61           O  
ATOM      9  N   PHE A   4       4.560  -7.135   2.595  1.00  4.55           N  
ATOM     10  CA  PHE A   4       3.311  -7.790   3.054  1.00  4.68           C  
ATOM     11  C   PHE A   4       2.342  -6.651   3.330  1.00  5.30           C  
ATOM     12  O   PHE A   4       2.721  -5.541   3.717  1.00  5.58           O  
ATOM     13  N   VAL A   5       1.000  -6.928   3.116  1.00  4.44           N  
ATOM     14  CA  VAL A   5      -0.023  -5.919   3.278  1.00  3.87           C  
ATOM     15  C   VAL A   5      -1.059  -6.524   4.181  1.00  4.93           C  
ATOM     16  O   VAL A   5      -1.669  -7.559   3.888  1.00  6.84           O  
ATOM     17  N   LYS A   6      -1.316  -5.849   5.301  1.00  6.04           N  
ATOM     18  CA  LYS A   6      -2.164  -6.334   6.304  1.00  6.12           C  
ATOM     19  C   LYS A   6      -3.487  -5.585   6.475  1.00  6.57           C  
ATOM     20  O   LYS A   6      -3.554  -4.351   6.656  1.00  5.76           O  
ATOM     21  N   THR A   7      -4.634  -6.248   6.317  1.00  7.41           N  
ATOM     22  CA  THR A   7      -5.960  -5.696   6.309  1.00  7.48           C  
ATOM     23  C   THR A   7      -6.568  -5.666   7.732  1.00  8.75           C  
ATOM     24  O   THR A   7      -6.080  -6.396   8.541  1.00  8.58           O  
ATOM     25  N   LEU A   8      -7.593  -4.821   8.030  1.00  9.84           N  
ATOM     26  CA  LEU A   8      -8.271  -4.687   9.353  1.00 14.15           C  
ATOM     27  C   LEU A   8      -8.886  -5.994   9.772  1.00 17.37           C  
ATOM     28  O   LEU A   8      -8.703  -6.410  10.904  1.00 17.01           O  
ATOM     29  N   THR A   9      -9.464  -6.819   8.845  1.00 18.33           N  
ATOM     30  CA  THR A   9     -10.229  -8.076   9.054  1.00 19.24           C  
ATOM     31  C   THR A   9      -9.362  -9.286   8.939  1.00 19.48           C  
ATOM     32  O   THR A   9      -9.812 -10.444   8.882  1.00 23.14           O  
ATOM     33  N   GLY A  10      -8.055  -9.044   8.861  1.00 19.43           N  
ATOM     34  CA  GLY A  10      -7.030 -10.079   9.134  1.00 18.74           C  
ATOM     35  C   GLY A  10      -6.411 -10.686   7.969  1.00 17.62           C  
ATOM     36  O   GLY A  10      -5.295 -11.213   8.062  1.00 19.74           O  
ATOM     37  N   LYS A  11      -7.057 -10.587   6.791  1.00 13.56           N  
ATOM     38  CA  LYS A  11      -6.598 -10.977   5.464  1.00 11.91           C  
ATOM     39  C   LYS A  11      -5.201 -10.447   5.186  1.00 10.18           C  
ATOM     40  O   LYS A  11      -4.948  -9.229   5.425  1.00  9.10           O  
ATOM     41  N   THR A  12      -4.165 -11.241   4.763  1.00  9.63           N  
ATOM     42  CA  THR A  12      -2.808 -10.766   4.620  1.00  9.85           C  
ATOM     43  C   THR A  12      -2.478 -10.915   3.185  1.00 11.66           C  
ATOM     44  O   THR A  12      -2.650 -12.004   2.634  1.00 12.33           O  
ATOM     45  N   ILE A  13      -1.962  -9.867   2.462  1.00 10.42           N  
ATOM     46  CA  ILE A  13      -1.553  -9.925   1.038  1.00 11.84           C  
ATOM     47  C   ILE A  13      -0.060  -9.908   0.964  1.00 10.55           C  
ATOM     48  O   ILE A  13       0.644  -9.398   1.810  1.00 11.92           O  
ATOM     49  N   THR A  14       0.462 -10.571  -0.059  1.00  9.39           N  
ATOM     50  CA  THR A  14       1.863 -10.667  -0.390  1.00  9.63           C  
ATOM     51  C   THR A  14       1.950 -10.012  -1.718  1.00 11.20           C  
ATOM     52  O   THR A  14       1.195 -10.218  -2.684  1.00 11.63           O  
ATOM     53  N   LEU A  15       2.941  -9.079  -1.866  1.00  8.29           N  
ATOM     54  CA  LEU A  15       3.078  -8.347  -3.073  1.00  9.03           C  
ATOM     55  C   LEU A  15       4.542  -8.425  -3.448  1.00  8.59           C  
ATOM     56  O   LEU A  15       5.426  -8.615  -2.589  1.00  7.79           O  
ATOM     57  N   GLU A  16       4.877  -8.261  -4.758  1.00 11.04           N  
ATOM     58  CA  GLU A  16       6.223  -8.175  -5.309  1.00 11.50           C  
ATOM     59  C   GLU A  16       6.386  -6.766  -5.956  1.00 10.13           C  
ATOM     60  O   GLU A  16       5.650  -6.439  -6.895  1.00  9.83           O  
ATOM     61  N   VAL A  17       7.267  -5.956  -5.353  1.00  8.99           N  
ATOM     62  CA  VAL A  17       7.344  -4.540  -5.776  1.00  8.85           C  
ATOM     63  C   VAL A  17       8.777  -4.058  -5.964  1.00  8.04           C  
ATOM     64  O   VAL A  17       9.747  -4.757  -5.547  1.00  8.99           O  
ATOM     65  N   GLU A  18       9.020  -2.921  -6.694  1.00  7.29           N  
ATOM     66  CA  GLU A  18      10.344  -2.332  -6.657  1.00  7.08           C  
ATOM     67  C   GLU A  18      10.297  -1.101  -5.690  1.00  6.45           C  
ATOM     68  O   GLU A  18       9.268  -0.460  -5.501  1.00  5.28           O  
ATOM     69  N   PRO A  19      11.409  -0.716  -5.021  1.00  7.24           N  
ATOM     70  CA  PRO A  19      11.381   0.495  -4.250  1.00  7.07           C  
ATOM     71  C   PRO A  19      11.138   1.748  -5.008  1.00  6.65           C  
ATOM     72  O   PRO A  19      10.711   2.767  -4.363  1.00  6.37           O  
ATOM     73  N   SER A  20      11.344   1.820  -6.370  1.00  6.80           N  
ATOM     74  CA  SER A  20      11.087   2.927  -7.222  1.00  6.28           C  
ATOM     75  C   SER A  20       9.642   2.863  -7.712  1.00  8.45           C  
ATOM     76  O   SER A  20       9.226   3.694  -8.488  1.00  7.26           O  
ATOM     77  N   ASP A  21       8.760   1.965  -7.174  1.00  7.50           N  
ATOM     78  CA  ASP A  21       7.387   1.948  -7.407  1.00  7.70           C  
ATOM     79  C   ASP A  21       6.638   3.046  -6.574  1.00  7.08           C  
ATOM     80  O   ASP A  21       6.722   3.062  -5.364  1.00  8.11           O  
ATOM     81  N   THR A  22       5.910   3.874  -7.287  1.00  5.37           N  
ATOM     82  CA  THR A  22       4.939   4.759  -6.657  1.00  6.01           C  
ATOM     83  C   THR A  22       3.813   4.047  -5.877  1.00  8.01           C  
ATOM     84  O   THR A  22       3.437   2.942  -6.181  1.00  8.11           O  
ATOM     85  N   ILE A  23       3.278   4.703  -4.831  1.00  8.32           N  
ATOM     86  CA  ILE A  23       2.329   4.094  -3.962  1.00  9.92           C  
ATOM     87  C   ILE A  23       1.019   3.879  -4.836  1.00 10.01           C  
ATOM     88  O   ILE A  23       0.366   2.866  -4.691  1.00  8.71           O  
ATOM     89  N   GLU A  24       0.692   4.755  -5.748  1.00  9.54           N  
ATOM     90  CA  GLU A  24      -0.348   4.576  -6.767  1.00 11.81           C  
ATOM     91  C   GLU A  24      -0.174   3.249  -7.559  1.00 11.14           C  
ATOM     92  O   GLU A  24      -1.142   2.426  -7.736  1.00 10.62           O  
ATOM     93  N   ASN A  25       1.055   2.967  -8.041  1.00  9.43           N  
ATOM     94  CA  ASN A  25       1.390   1.708  -8.656  1.00 10.96           C  
ATOM     95  C   ASN A  25       1.080   0.511  -7.788  1.00  9.68           C  
ATOM     96  O   ASN A  25       0.655  -0.560  -8.209  1.00  9.33           O  
ATOM     97  N   VAL A  26       1.502   0.698  -6.491  1.00  6.52           N  
ATOM     98  CA  VAL A  26       1.429  -0.348  -5.466  1.00  5.53           C  
ATOM     99  C   VAL A  26      -0.019  -0.698  -5.190  1.00  4.42           C  
ATOM    100  O   VAL A  26      -0.440  -1.849  -5.151  1.00  3.40           O  
ATOM    101  N   LYS A  27      -0.929   0.312  -5.114  1.00  2.64           N  
ATOM    102  CA  LYS A  27      -2.386   0.157  -4.904  1.00  4.14           C  
ATOM    103  C   LYS A  27      -3.107  -0.464  -6.176  1.00  5.58           C  
ATOM    104  O   LYS A  27      -4.173  -1.069  -6.053  1.00  4.11           O  
ATOM    105  N   ALA A  28      -2.636  -0.185  -7.419  1.00  6.61           N  
ATOM    106  CA  ALA A  28      -2.943  -0.923  -8.617  1.00  7.74           C  
ATOM    107  C   ALA A  28      -2.485  -2.420  -8.624  1.00  9.17           C  
ATOM    108  O   ALA A  28      -3.148  -3.307  -9.211  1.00 11.45           O  
ATOM    109  N   LYS A  29      -1.369  -2.798  -8.025  1.00  8.96           N  
ATOM    110  CA  LYS A  29      -1.043  -4.161  -7.686  1.00  7.90           C  
ATOM    111  C   LYS A  29      -1.948  -4.791  -6.601  1.00  6.92           C  
ATOM    112  O   LYS A  29      -2.498  -5.861  -6.752  1.00  6.87           O  
ATOM    113  N   ILE A  30      -2.337  -4.031  -5.558  1.00  4.57           N  
ATOM    114  CA  ILE A  30      -3.414  -4.428  -4.646  1.00  5.58           C  
ATOM    115  C   ILE A  30      -4.732  -4.657  -5.309  1.00  7.26           C  
ATOM    116  O   ILE A  30      -5.561  -5.538  -5.008  1.00  9.46           O  
ATOM    117  N   GLN A  31      -5.109  -3.833  -6.318  1.00  7.06           N  
ATOM    118  CA  GLN A  31      -6.273  -3.947  -7.130  1.00  8.67           C  
ATOM    119  C   GLN A  31      -6.368  -5.241  -7.929  1.00 10.90           C  
ATOM    120  O   GLN A  31      -7.458  -5.826  -7.980  1.00  9.63           O  
ATOM    121  N   ASP A  32      -5.274  -5.703  -8.495  1.00 10.93           N  
ATOM    122  CA  ASP A  32      -5.196  -6.951  -9.148  1.00 14.01           C  
ATOM    123  C   ASP A  32      -5.476  -8.113  -8.220  1.00 14.04           C  
ATOM    124  O   ASP A  32      -6.354  -8.956  -8.434  1.00 13.39           O  
ATOM    125  N   LYS A  33      -4.778  -8.093  -7.044  1.00 14.22           N  
ATOM    126  CA  LYS A  33      -4.876  -9.045  -5.990  1.00 14.00           C  
ATOM    127  C   LYS A  33      -6.239  -9.276  -5.356  1.00 12.37           C  
ATOM    128  O   LYS A  33      -6.662 -10.411  -5.159  1.00 12.17           O  
ATOM    129  N   GLU A  34      -6.933  -8.191  -4.960  1.00 10.11           N  
ATOM    130  CA  GLU A  34      -8.113  -8.160  -4.101  1.00 10.07           C  
ATOM    131  C   GLU A  34      -9.354  -7.500  -4.758  1.00  9.32           C  
ATOM    132  O   GLU A  34     -10.412  -7.619  -4.139  1.00 11.61           O  
ATOM    133  N   GLY A  35      -9.349  -6.836  -5.954  1.00  7.22           N  
ATOM    134  CA  GLY A  35     -10.481  -6.174  -6.569  1.00  6.29           C  
ATOM    135  C   GLY A  35     -10.699  -4.764  -6.014  1.00  6.93           C  
ATOM    136  O   GLY A  35     -11.547  -4.003  -6.498  1.00  7.41           O  
ATOM    137  N   ILE A  36      -9.890  -4.235  -5.081  1.00  5.86           N  
ATOM    138  CA  ILE A  36     -10.198  -2.963  -4.406  1.00  6.07           C  
ATOM    139  C   ILE A  36      -9.851  -1.709  -5.270  1.00  6.36           C  
ATOM    140  O   ILE A  36      -8.666  -1.598  -5.623  1.00  6.18           O  
ATOM    141  N   PRO A  37     -10.784  -0.800  -5.586  1.00  8.65           N  
ATOM    142  CA  PRO A  37     -10.488   0.397  -6.281  1.00  9.18           C  
ATOM    143  C   PRO A  37      -9.468   1.327  -5.627  1.00  9.85           C  
ATOM    144  O   PRO A  37      -9.735   1.576  -4.437  1.00  8.51           O  
ATOM    145  N   PRO A  38      -8.348   1.786  -6.226  1.00  8.71           N  
ATOM    146  CA  PRO A  38      -7.141   2.282  -5.473  1.00  9.08           C  
ATOM    147  C   PRO A  38      -7.336   3.555  -4.654  1.00  9.28           C  
ATOM    148  O   PRO A  38      -6.505   3.887  -3.799  1.00  6.50           O  
ATOM    149  N   ASP A  39      -8.426   4.298  -4.864  1.00 11.20           N  
ATOM    150  CA  ASP A  39      -8.648   5.531  -4.117  1.00 14.96           C  
ATOM    151  C   ASP A  39      -9.595   5.204  -3.063  1.00 13.99           C  
ATOM    152  O   ASP A  39      -9.865   6.065  -2.210  1.00 13.75           O  
ATOM    153  N   GLN A  40     -10.052   3.926  -2.976  1.00 11.60           N  
ATOM    154  CA  GLN A  40     -10.807   3.436  -1.787  1.00 10.76           C  
ATOM    155  C   GLN A  40      -9.977   2.592  -0.869  1.00  8.01           C  
ATOM    156  O   GLN A  40     -10.511   1.899  -0.018  1.00  8.96           O  
ATOM    157  N   GLN A  41      -8.622   2.609  -1.065  1.00  6.52           N  
ATOM    158  CA  GLN A  41      -7.540   2.045  -0.282  1.00  3.87           C  
ATOM    159  C   GLN A  41      -6.679   3.224   0.301  1.00  4.79           C  
ATOM    160  O   GLN A  41      -6.501   4.336  -0.158  1.00  6.34           O  
ATOM    161  N   ARG A  42      -6.077   2.900   1.456  1.00  5.73           N  
ATOM    162  CA  ARG A  42      -5.127   3.662   2.146  1.00  6.97           C  
ATOM    163  C   ARG A  42      -4.119   2.753   2.879  1.00  7.15           C  
ATOM    164  O   ARG A  42      -4.431   1.729   3.461  1.00  7.33           O  
ATOM    165  N   LEU A  43      -2.859   3.139   2.795  1.00  4.65           N  
ATOM    166  CA  LEU A  43      -1.773   2.331   3.186  1.00  3.51           C  
ATOM    167  C   LEU A  43      -0.986   3.102   4.221  1.00  5.56           C  
ATOM    168  O   LEU A  43      -0.689   4.299   4.019  1.00  4.19           O  
ATOM    169  N   ILE A  44      -0.675   2.426   5.377  1.00  4.58           N  
ATOM    170  CA  ILE A  44      -0.162   3.080   6.585  1.00  5.55           C  
ATOM    171  C   ILE A  44       1.173   2.365   6.960  1.00  5.46           C  
ATOM    172  O   ILE A  44       1.206   1.146   7.152  1.00  6.04           O  
ATOM    173  N   PHE A  45       2.241   3.157   7.105  1.00  6.75           N  
ATOM    174  CA  PHE A  45       3.543   2.644   7.496  1.00  4.70           C  
ATOM    175  C   PHE A  45       4.202   3.553   8.487  1.00  6.34           C  
ATOM    176  O   PHE A  45       4.375   4.701   8.225  1.00  5.45           O  
ATOM    177  N   ALA A  46       4.525   3.007   9.699  1.00  6.53           N  
ATOM    178  CA  ALA A  46       5.325   3.666  10.789  1.00  7.15           C  
ATOM    179  C   ALA A  46       4.831   5.063  11.159  1.00  9.00           C  
ATOM    180  O   ALA A  46       5.608   5.998  11.177  1.00 11.15           O  
ATOM    181  N   GLY A  47       3.493   5.181  11.329  1.00  9.35           N  
ATOM    182  CA  GLY A  47       2.907   6.437  11.607  1.00 11.68           C  
ATOM    183  C   GLY A  47       2.718   7.312  10.380  1.00 11.14           C  
ATOM    184  O   GLY A  47       2.267   8.452  10.561  1.00 13.93           O  
ATOM    185  N   LYS A  48       3.090   6.915   9.156  1.00 10.47           N  
ATOM    186  CA  LYS A  48       2.941   7.695   7.940  1.00  8.82           C  
ATOM    187  C   LYS A  48       1.829   7.185   7.038  1.00  7.68           C  
ATOM    188  O   LYS A  48       1.651   5.985   6.899  1.00  6.47           O  
ATOM    189  N   GLN A  49       1.071   8.134   6.408  1.00  8.89           N  
ATOM    190  CA  GLN A  49       0.044   7.790   5.431  1.00  7.18           C  
ATOM    191  C   GLN A  49       0.671   8.023   4.073  1.00  8.23           C  
ATOM    192  O   GLN A  49       1.241   9.099   3.802  1.00  9.70           O  
ATOM    193  N   LEU A  50       0.636   6.966   3.191  1.00  6.51           N  
ATOM    194  CA  LEU A  50       1.471   6.982   2.027  1.00  7.41           C  
ATOM    195  C   LEU A  50       0.711   7.707   0.843  1.00  8.27           C  
ATOM    196  O   LEU A  50      -0.354   7.268   0.440  1.00  8.34           O  
ATOM    197  N   GLU A  51       1.301   8.853   0.338  1.00  9.43           N  
ATOM    198  CA  GLU A  51       0.797   9.708  -0.773  1.00 11.90           C  
ATOM    199  C   GLU A  51       0.936   9.095  -2.150  1.00 11.49           C  
ATOM    200  O   GLU A  51       1.843   8.354  -2.411  1.00  9.88           O  
ATOM    201  N   ASP A  52       0.005   9.372  -3.048  1.00 12.71           N  
ATOM    202  CA  ASP A  52      -0.107   8.634  -4.277  1.00 16.56           C  
ATOM    203  C   ASP A  52       1.137   8.591  -5.258  1.00 15.83           C  
ATOM    204  O   ASP A  52       1.533   7.519  -5.700  1.00 17.21           O  
ATOM    205  N   GLY A  53       1.750   9.770  -5.598  1.00 15.00           N  
ATOM    206  CA  GLY A  53       2.964   9.857  -6.423  1.00 11.77           C  
ATOM    207  C   GLY A  53       4.239   9.607  -5.666  1.00 11.10           C  
ATOM    208  O   GLY A  53       5.258   9.713  -6.328  1.00 11.25           O  
ATOM    209  N   ARG A  54       4.269   9.394  -4.363  1.00  8.53           N  
ATOM    210  CA  ARG A  54       5.455   9.062  -3.553  1.00  9.05           C  
ATOM    211  C   ARG A  54       5.872   7.643  -3.836  1.00  8.96           C  
ATOM    212  O   ARG A  54       5.025   6.798  -4.093  1.00 11.60           O  
ATOM    213  N   THR A  55       7.218   7.385  -3.742  1.00  9.05           N  
ATOM    214  CA  THR A  55       7.728   6.016  -4.008  1.00  9.03           C  
ATOM    215  C   THR A  55       8.021   5.327  -2.649  1.00  8.15           C  
ATOM    216  O   THR A  55       8.167   6.023  -1.635  1.00  5.91           O  
ATOM    217  N   LEU A  56       7.970   3.976  -2.657  1.00  6.91           N  
ATOM    218  CA  LEU A  56       8.324   3.097  -1.502  1.00  8.29           C  
ATOM    219  C   LEU A  56       9.721   3.456  -0.862  1.00  8.05           C  
ATOM    220  O   LEU A  56       9.973   3.462   0.365  1.00 10.17           O  
ATOM    221  N   SER A  57      10.634   3.782  -1.768  1.00  8.92           N  
ATOM    222  CA  SER A  57      11.983   4.223  -1.416  1.00  9.00           C  
ATOM    223  C   SER A  57      11.972   5.576  -0.628  1.00  9.44           C  
ATOM    224  O   SER A  57      12.806   5.771   0.236  1.00 10.91           O  
ATOM    225  N   ASP A  58      11.095   6.580  -0.980  1.00  9.11           N  
ATOM    226  CA  ASP A  58      11.026   7.801  -0.307  1.00  7.91           C  
ATOM    227  C   ASP A  58      10.602   7.633   1.124  1.00  9.12           C  
ATOM    228  O   ASP A  58      10.845   8.504   2.006  1.00  8.61           O  
ATOM    229  N   TYR A  59       9.936   6.516   1.473  1.00  7.97           N  
ATOM    230  CA  TYR A  59       9.542   6.149   2.852  1.00  8.45           C  
ATOM    231  C   TYR A  59      10.445   5.162   3.569  1.00 10.98           C  
ATOM    232  O   TYR A  59      10.110   4.742   4.668  1.00 12.95           O  
ATOM    233  N   ASN A  60      11.537   4.766   2.905  1.00 12.38           N  
ATOM    234  CA  ASN A  60      12.419   3.746   3.440  1.00 13.94           C  
ATOM    235  C   ASN A  60      11.687   2.436   3.803  1.00 14.16           C  
ATOM    236  O   ASN A  60      11.872   1.842   4.880  1.00 14.26           O  
ATOM    237  N   ILE A  61      10.838   1.915   2.876  1.00 11.08           N  
ATOM    238  CA  ILE A  61      10.192   0.591   2.992  1.00 11.78           C  
ATOM    239  C   ILE A  61      11.070  -0.477   2.370  1.00 13.74           C  
ATOM    240  O   ILE A  61      11.825  -0.208   1.437  1.00 14.60           O  
ATOM    241  N   GLN A  62      11.110  -1.673   2.957  1.00 13.97           N  
ATOM    242  CA  GLN A  62      12.182  -2.557   2.717  1.00 15.52           C  
ATOM    243  C   GLN A  62      11.666  -3.959   2.574  1.00 13.94           C  
ATOM    244  O   GLN A  62      10.524  -4.254   2.832  1.00 12.15           O  
ATOM    245  N   LYS A  63      12.470  -4.968   2.162  1.00 11.73           N  
ATOM    246  CA  LYS A  63      12.113  -6.386   2.184  1.00 11.97           C  
ATOM    247  C   LYS A  63      11.516  -6.931   3.495  1.00 10.41           C  
ATOM    248  O   LYS A  63      11.935  -6.734   4.629  1.00  9.59           O  
ATOM    249  N   GLU A  64      10.341  -7.634   3.343  1.00 10.04           N  
ATOM    250  CA  GLU A  64       9.521  -8.296   4.335  1.00 10.94           C  
ATOM    251  C   GLU A  64       8.739  -7.329   5.114  1.00  9.74           C  
ATOM    252  O   GLU A  64       8.190  -7.567   6.195  1.00  9.42           O  
ATOM    253  N   SER A  65       8.602  -6.050   4.617  1.00  6.85           N  
ATOM    254  CA  SER A  65       7.819  -5.064   5.359  1.00  6.90           C  
ATOM    255  C   SER A  65       6.359  -5.355   5.377  1.00  4.72           C  
ATOM    256  O   SER A  65       5.770  -5.566   4.313  1.00  3.91           O  
ATOM    257  N   THR A  66       5.727  -5.306   6.549  1.00  4.48           N  
ATOM    258  CA  THR A  66       4.282  -5.203   6.626  1.00  3.80           C  
ATOM    259  C   THR A  66       3.732  -3.786   6.538  1.00  4.60           C  
ATOM    260  O   THR A  66       4.066  -2.941   7.366  1.00  5.33           O  
ATOM    261  N   LEU A  67       2.830  -3.463   5.591  1.00  4.17           N  
ATOM    262  CA  LEU A  67       2.186  -2.151   5.398  1.00  3.85           C  
ATOM    263  C   LEU A  67       0.775  -2.408   5.860  1.00  3.80           C  
ATOM    264  O   LEU A  67       0.141  -3.394   5.538  1.00  5.54           O  
ATOM    265  N   HIS A  68       0.197  -1.438   6.628  1.00  2.94           N  
ATOM    266  CA  HIS A  68      -1.198  -1.536   7.001  1.00  4.17           C  
ATOM    267  C   HIS A  68      -2.177  -1.121   5.948  1.00  5.32           C  
ATOM    268  O   HIS A  68      -2.050  -0.018   5.428  1.00  7.70           O  
ATOM    269  N   LEU A  69      -3.219  -1.888   5.634  1.00  5.29           N  
ATOM    270  CA  LEU A  69      -4.260  -1.440   4.650  1.00  3.97           C  
ATOM    271  C   LEU A  69      -5.508  -1.052   5.420  1.00  5.07           C  
ATOM    272  O   LEU A  69      -6.051  -1.847   6.159  1.00  4.34           O  
ATOM    273  N   VAL A  70      -6.000   0.215   5.197  1.00  4.29           N  
ATOM    274  CA  VAL A  70      -7.247   0.688   5.702  1.00  6.26           C  
ATOM    275  C   VAL A  70      -8.089   1.064   4.513  1.00  9.22           C  
ATOM    276  O   VAL A  70      -7.580   1.622   3.479  1.00  9.36           O  
TER
ENDMDL
MODEL      9
ATOM      1  N   GLN A   2       9.849  -8.308  -1.910  1.00  9.27           N  
ATOM      2  CA  GLN A   2       8.599  -8.791  -1.398  1.00  9.07           C  
ATOM      3  C   GLN A   2       8.123  -7.848  -0.285  1.00  8.72           C  
ATOM      4  O   GLN A   2       8.834  -7.609   0.688  1.00  8.22           O  
ATOM      5  N   ILE A   3       6.873  -7.363  -0.439  1.00  5.87           N  
ATOM      6  CA  ILE A   3       6.180  -6.580   0.603  1.00  5.07           C  
ATOM      7  C   ILE A   3       4.888  -7.336   0.973  1.00  4.01           C  
ATOM      8  O   ILE A   3       4.367  -8.104   0.170  1.00  4.61           O  
ATOM      9  N   PHE A   4       4.476  -7.089   2.239  1.00  4.55           N  
ATOM     10  CA  PHE A   4       3.266  -7.736   2.743  1.00  4.68           C  
ATOM     11  C   PHE A   4       2.319  -6.666   3.069  1.00  5.30           C  
ATOM     12  O   PHE A   4       2.730  -5.711   3.744  1.00  5.58           O  
ATOM     13  N   VAL A   5       1.089  -6.744   2.632  1.00  4.44           N  
ATOM     14  CA  VAL A   5       0.106  -5.691   2.913  1.00  3.87           C  
ATOM     15  C   VAL A   5      -0.846  -6.443   3.796  1.00  4.93           C  
ATOM     16  O   VAL A   5      -1.412  -7.458   3.429  1.00  6.84           O  
ATOM     17  N   LYS A   6      -1.049  -5.890   5.022  1.00  6.04           N  
ATOM     18  CA  LYS A   6      -1.830  -6.537   6.082  1.00  6.12           C  
ATOM     19  C   LYS A   6      -2.957  -5.550   6.412  1.00  6.57           C  
ATOM     20  O   LYS A   6      -2.798  -4.350   6.402  1.00  5.76           O  
ATOM     21  N   THR A   7      -4.155  -6.160   6.586  1.00  7.41           N  
ATOM     22  CA  THR A   7      -5.401  -5.382   6.860  1.00  7.48           C  
ATOM     23  C   THR A   7      -5.689  -5.338   8.372  1.00  8.75           C  
ATOM     24  O   THR A   7      -5.101  -6.067   9.187  1.00  8.58           O  
ATOM     25  N   LEU A   8      -6.667  -4.531   8.815  1.00  9.84           N  
ATOM     26  CA  LEU A   8      -7.065  -4.362  10.243  1.00 14.15           C  
ATOM     27  C   LEU A   8      -7.512  -5.626  10.830  1.00 17.37           C  
ATOM     28  O   LEU A   8      -7.255  -6.017  11.984  1.00 17.01           O  
ATOM     29  N   THR A   9      -8.265  -6.423  10.062  1.00 18.33           N  
ATOM     30  CA  THR A   9      -8.781  -7.697  10.546  1.00 19.24           C  
ATOM     31  C   THR A   9      -7.935  -8.801   9.793  1.00 19.48           C  
ATOM     32  O   THR A   9      -8.439  -9.895   9.659  1.00 23.14           O  
ATOM     33  N   GLY A  10      -6.691  -8.537   9.396  1.00 19.43           N  
ATOM     34  CA  GLY A  10      -5.624  -9.554   9.296  1.00 18.74           C  
ATOM     35  C   GLY A  10      -5.573 -10.382   8.102  1.00 17.62           C  
ATOM     36  O   GLY A  10      -5.147 -11.530   8.220  1.00 19.74           O  
ATOM     37  N   LYS A  11      -6.034 -10.007   6.911  1.00 13.56           N  
ATOM     38  CA  LYS A  11      -5.687 -10.700   5.648  1.00 11.91           C  
ATOM     39  C   LYS A  11      -4.346 -10.223   5.086  1.00 10.18           C  
ATOM     40  O   LYS A  11      -4.226  -9.076   4.673  1.00  9.10           O  
ATOM     41  N   THR A  12      -3.297 -11.014   5.049  1.00  9.63           N  
ATOM     42  CA  THR A  12      -2.038 -10.721   4.355  1.00  9.85           C  
ATOM     43  C   THR A  12      -2.176 -10.927   2.905  1.00 11.66           C  
ATOM     44  O   THR A  12      -2.341 -12.071   2.442  1.00 12.33           O  
ATOM     45  N   ILE A  13      -1.888  -9.862   2.099  1.00 10.42           N  
ATOM     46  CA  ILE A  13      -1.571 -10.094   0.674  1.00 11.84           C  
ATOM     47  C   ILE A  13      -0.156  -9.780   0.321  1.00 10.55           C  
ATOM     48  O   ILE A  13       0.560  -8.971   0.904  1.00 11.92           O  
ATOM     49  N   THR A  14       0.414 -10.557  -0.593  1.00  9.39           N  
ATOM     50  CA  THR A  14       1.812 -10.661  -0.844  1.00  9.63           C  
ATOM     51  C   THR A  14       2.095 -10.131  -2.216  1.00 11.20           C  
ATOM     52  O   THR A  14       1.557 -10.673  -3.189  1.00 11.63           O  
ATOM     53  N   LEU A  15       2.962  -9.114  -2.414  1.00  8.29           N  
ATOM     54  CA  LEU A  15       3.187  -8.489  -3.684  1.00  9.03           C  
ATOM     55  C   LEU A  15       4.667  -8.591  -4.072  1.00  8.59           C  
ATOM     56  O   LEU A  15       5.474  -8.826  -3.192  1.00  7.79           O  
ATOM     57  N   GLU A  16       5.038  -8.364  -5.360  1.00 11.04           N  
ATOM     58  CA  GLU A  16       6.472  -8.162  -5.735  1.00 11.50           C  
ATOM     59  C   GLU A  16       6.672  -6.784  -6.397  1.00 10.13           C  
ATOM     60  O   GLU A  16       6.047  -6.456  -7.405  1.00  9.83           O  
ATOM     61  N   VAL A  17       7.583  -5.969  -5.758  1.00  8.99           N  
ATOM     62  CA  VAL A  17       7.757  -4.580  -6.154  1.00  8.85           C  
ATOM     63  C   VAL A  17       9.210  -4.208  -6.033  1.00  8.04           C  
ATOM     64  O   VAL A  17       9.955  -4.935  -5.337  1.00  8.99           O  
ATOM     65  N   GLU A  18       9.636  -3.096  -6.652  1.00  7.29           N  
ATOM     66  CA  GLU A  18      10.994  -2.704  -6.438  1.00  7.08           C  
ATOM     67  C   GLU A  18      10.956  -1.480  -5.573  1.00  6.45           C  
ATOM     68  O   GLU A  18       9.885  -0.854  -5.431  1.00  5.28           O  
ATOM     69  N   PRO A  19      12.061  -1.048  -4.971  1.00  7.24           N  
ATOM     70  CA  PRO A  19      12.053   0.102  -4.051  1.00  7.07           C  
ATOM     71  C   PRO A  19      11.788   1.384  -4.863  1.00  6.65           C  
ATOM     72  O   PRO A  19      11.543   2.436  -4.316  1.00  6.37           O  
ATOM     73  N   SER A  20      11.931   1.362  -6.226  1.00  6.80           N  
ATOM     74  CA  SER A  20      11.597   2.471  -7.070  1.00  6.28           C  
ATOM     75  C   SER A  20      10.155   2.625  -7.542  1.00  8.45           C  
ATOM     76  O   SER A  20       9.835   3.736  -8.039  1.00  7.26           O  
ATOM     77  N   ASP A  21       9.334   1.559  -7.343  1.00  7.50           N  
ATOM     78  CA  ASP A  21       7.912   1.463  -7.740  1.00  7.70           C  
ATOM     79  C   ASP A  21       7.187   2.375  -6.838  1.00  7.08           C  
ATOM     80  O   ASP A  21       7.506   2.652  -5.652  1.00  8.11           O  
ATOM     81  N   THR A  22       6.141   3.002  -7.381  1.00  5.37           N  
ATOM     82  CA  THR A  22       5.360   3.962  -6.637  1.00  6.01           C  
ATOM     83  C   THR A  22       4.277   3.349  -5.745  1.00  8.01           C  
ATOM     84  O   THR A  22       3.816   2.191  -5.990  1.00  8.11           O  
ATOM     85  N   ILE A  23       3.961   4.157  -4.726  1.00  8.32           N  
ATOM     86  CA  ILE A  23       2.854   3.880  -3.816  1.00  9.92           C  
ATOM     87  C   ILE A  23       1.507   3.699  -4.574  1.00 10.01           C  
ATOM     88  O   ILE A  23       0.738   2.751  -4.362  1.00  8.71           O  
ATOM     89  N   GLU A  24       1.204   4.512  -5.614  1.00  9.54           N  
ATOM     90  CA  GLU A  24       0.227   4.249  -6.672  1.00 11.81           C  
ATOM     91  C   GLU A  24       0.340   2.794  -7.319  1.00 11.14           C  
ATOM     92  O   GLU A  24      -0.679   2.131  -7.390  1.00 10.62           O  
ATOM     93  N   ASN A  25       1.533   2.334  -7.742  1.00  9.43           N  
ATOM     94  CA  ASN A  25       1.690   1.053  -8.311  1.00 10.96           C  
ATOM     95  C   ASN A  25       1.408  -0.160  -7.405  1.00  9.68           C  
ATOM     96  O   ASN A  25       0.834  -1.198  -7.728  1.00  9.33           O  
ATOM     97  N   VAL A  26       1.841  -0.033  -6.125  1.00  6.52           N  
ATOM     98  CA  VAL A  26       1.517  -0.900  -5.028  1.00  5.53           C  
ATOM     99  C   VAL A  26       0.017  -0.992  -4.818  1.00  4.42           C  
ATOM    100  O   VAL A  26      -0.526  -2.096  -4.842  1.00  3.40           O  
ATOM    101  N   LYS A  27      -0.793   0.113  -4.831  1.00  2.64           N  
ATOM    102  CA  LYS A  27      -2.246   0.117  -4.839  1.00  4.14           C  
ATOM    103  C   LYS A  27      -2.818  -0.569  -6.051  1.00  5.58           C  
ATOM    104  O   LYS A  27      -3.919  -1.131  -5.952  1.00  4.11           O  
ATOM    105  N   ALA A  28      -2.144  -0.520  -7.196  1.00  6.61           N  
ATOM    106  CA  ALA A  28      -2.686  -1.233  -8.337  1.00  7.74           C  
ATOM    107  C   ALA A  28      -2.435  -2.732  -8.269  1.00  9.17           C  
ATOM    108  O   ALA A  28      -3.302  -3.518  -8.582  1.00 11.45           O  
ATOM    109  N   LYS A  29      -1.276  -3.227  -7.727  1.00  8.96           N  
ATOM    110  CA  LYS A  29      -1.054  -4.608  -7.342  1.00  7.90           C  
ATOM    111  C   LYS A  29      -2.014  -5.137  -6.329  1.00  6.92           C  
ATOM    112  O   LYS A  29      -2.399  -6.320  -6.417  1.00  6.87           O  
ATOM    113  N   ILE A  30      -2.479  -4.261  -5.430  1.00  4.57           N  
ATOM    114  CA  ILE A  30      -3.551  -4.543  -4.430  1.00  5.58           C  
ATOM    115  C   ILE A  30      -4.875  -4.643  -5.106  1.00  7.26           C  
ATOM    116  O   ILE A  30      -5.678  -5.511  -4.794  1.00  9.46           O  
ATOM    117  N   GLN A  31      -5.210  -3.883  -6.132  1.00  7.06           N  
ATOM    118  CA  GLN A  31      -6.399  -3.951  -6.836  1.00  8.67           C  
ATOM    119  C   GLN A  31      -6.482  -5.186  -7.693  1.00 10.90           C  
ATOM    120  O   GLN A  31      -7.565  -5.761  -7.904  1.00  9.63           O  
ATOM    121  N   ASP A  32      -5.291  -5.629  -8.249  1.00 10.93           N  
ATOM    122  CA  ASP A  32      -5.120  -6.953  -8.797  1.00 14.01           C  
ATOM    123  C   ASP A  32      -5.560  -8.044  -7.799  1.00 14.04           C  
ATOM    124  O   ASP A  32      -6.386  -8.845  -8.172  1.00 13.39           O  
ATOM    125  N   LYS A  33      -5.119  -8.048  -6.562  1.00 14.22           N  
ATOM    126  CA  LYS A  33      -5.511  -9.070  -5.689  1.00 14.00           C  
ATOM    127  C   LYS A  33      -6.968  -8.950  -5.227  1.00 12.37           C  
ATOM    128  O   LYS A  33      -7.707  -9.970  -5.105  1.00 12.17           O  
ATOM    129  N   GLU A  34      -7.377  -7.769  -4.907  1.00 10.11           N  
ATOM    130  CA  GLU A  34      -8.553  -7.656  -4.016  1.00 10.07           C  
ATOM    131  C   GLU A  34      -9.652  -6.759  -4.603  1.00  9.32           C  
ATOM    132  O   GLU A  34     -10.714  -6.584  -4.027  1.00 11.61           O  
ATOM    133  N   GLY A  35      -9.442  -6.295  -5.865  1.00  7.22           N  
ATOM    134  CA  GLY A  35     -10.423  -5.605  -6.645  1.00  6.29           C  
ATOM    135  C   GLY A  35     -10.872  -4.208  -6.213  1.00  6.93           C  
ATOM    136  O   GLY A  35     -11.840  -3.613  -6.711  1.00  7.41           O  
ATOM    137  N   ILE A  36     -10.191  -3.648  -5.150  1.00  5.86           N  
ATOM    138  CA  ILE A  36     -10.528  -2.429  -4.444  1.00  6.07           C  
ATOM    139  C   ILE A  36     -10.054  -1.313  -5.321  1.00  6.36           C  
ATOM    140  O   ILE A  36      -8.849  -1.176  -5.593  1.00  6.18           O  
ATOM    141  N   PRO A  37     -10.771  -0.361  -5.846  1.00  8.65           N  
ATOM    142  CA  PRO A  37     -10.249   0.755  -6.631  1.00  9.18           C  
ATOM    143  C   PRO A  37      -9.176   1.537  -5.771  1.00  9.85           C  
ATOM    144  O   PRO A  37      -9.411   1.786  -4.589  1.00  8.51           O  
ATOM    145  N   PRO A  38      -8.008   1.898  -6.246  1.00  8.71           N  
ATOM    146  CA  PRO A  38      -6.952   2.601  -5.484  1.00  9.08           C  
ATOM    147  C   PRO A  38      -7.367   3.822  -4.762  1.00  9.28           C  
ATOM    148  O   PRO A  38      -6.790   4.081  -3.700  1.00  6.50           O  
ATOM    149  N   ASP A  39      -8.359   4.579  -5.258  1.00 11.20           N  
ATOM    150  CA  ASP A  39      -8.778   5.774  -4.580  1.00 14.96           C  
ATOM    151  C   ASP A  39      -9.458   5.515  -3.277  1.00 13.99           C  
ATOM    152  O   ASP A  39      -9.354   6.395  -2.394  1.00 13.75           O  
ATOM    153  N   GLN A  40     -10.033   4.322  -3.085  1.00 11.60           N  
ATOM    154  CA  GLN A  40     -10.582   3.836  -1.828  1.00 10.76           C  
ATOM    155  C   GLN A  40      -9.536   3.286  -0.850  1.00  8.01           C  
ATOM    156  O   GLN A  40      -9.653   3.322   0.392  1.00  8.96           O  
ATOM    157  N   GLN A  41      -8.416   2.824  -1.378  1.00  6.52           N  
ATOM    158  CA  GLN A  41      -7.322   2.347  -0.538  1.00  3.87           C  
ATOM    159  C   GLN A  41      -6.548   3.437   0.268  1.00  4.79           C  
ATOM    160  O   GLN A  41      -6.037   4.433  -0.313  1.00  6.34           O  
ATOM    161  N   ARG A  42      -6.284   3.233   1.530  1.00  5.73           N  
ATOM    162  CA  ARG A  42      -5.364   3.990   2.357  1.00  6.97           C  
ATOM    163  C   ARG A  42      -4.325   3.015   2.850  1.00  7.15           C  
ATOM    164  O   ARG A  42      -4.702   2.030   3.417  1.00  7.33           O  
ATOM    165  N   LEU A  43      -3.023   3.356   2.689  1.00  4.65           N  
ATOM    166  CA  LEU A  43      -1.922   2.539   3.146  1.00  3.51           C  
ATOM    167  C   LEU A  43      -1.177   3.244   4.275  1.00  5.56           C  
ATOM    168  O   LEU A  43      -0.678   4.356   4.050  1.00  4.19           O  
ATOM    169  N   ILE A  44      -1.096   2.652   5.502  1.00  4.58           N  
ATOM    170  CA  ILE A  44      -0.605   3.274   6.704  1.00  5.55           C  
ATOM    171  C   ILE A  44       0.784   2.611   6.995  1.00  5.46           C  
ATOM    172  O   ILE A  44       0.905   1.389   6.966  1.00  6.04           O  
ATOM    173  N   PHE A  45       1.839   3.376   7.274  1.00  6.75           N  
ATOM    174  CA  PHE A  45       3.106   2.785   7.635  1.00  4.70           C  
ATOM    175  C   PHE A  45       3.893   3.800   8.439  1.00  6.34           C  
ATOM    176  O   PHE A  45       3.786   5.016   8.181  1.00  5.45           O  
ATOM    177  N   ALA A  46       4.715   3.342   9.413  1.00  6.53           N  
ATOM    178  CA  ALA A  46       5.435   4.111  10.358  1.00  7.15           C  
ATOM    179  C   ALA A  46       4.759   5.307  10.989  1.00  9.00           C  
ATOM    180  O   ALA A  46       5.351   6.340  11.267  1.00 11.15           O  
ATOM    181  N   GLY A  47       3.431   5.188  11.238  1.00  9.35           N  
ATOM    182  CA  GLY A  47       2.611   6.283  11.840  1.00 11.68           C  
ATOM    183  C   GLY A  47       2.068   7.268  10.807  1.00 11.14           C  
ATOM    184  O   GLY A  47       1.462   8.261  11.219  1.00 13.93           O  
ATOM    185  N   LYS A  48       2.282   7.057   9.508  1.00 10.47           N  
ATOM    186  CA  LYS A  48       1.922   7.978   8.460  1.00  8.82           C  
ATOM    187  C   LYS A  48       0.986   7.331   7.508  1.00  7.68           C  
ATOM    188  O   LYS A  48       0.758   6.121   7.508  1.00  6.47           O  
ATOM    189  N   GLN A  49       0.335   8.171   6.635  1.00  8.89           N  
ATOM    190  CA  GLN A  49      -0.330   7.581   5.453  1.00  7.18           C  
ATOM    191  C   GLN A  49       0.603   7.674   4.273  1.00  8.23           C  
ATOM    192  O   GLN A  49       1.363   8.622   4.152  1.00  9.70           O  
ATOM    193  N   LEU A  50       0.607   6.755   3.317  1.00  6.51           N  
ATOM    194  CA  LEU A  50       1.486   6.775   2.149  1.00  7.41           C  
ATOM    195  C   LEU A  50       0.829   7.463   0.948  1.00  8.27           C  
ATOM    196  O   LEU A  50      -0.285   7.172   0.473  1.00  8.34           O  
ATOM    197  N   GLU A  51       1.468   8.542   0.460  1.00  9.43           N  
ATOM    198  CA  GLU A  51       1.031   9.328  -0.670  1.00 11.90           C  
ATOM    199  C   GLU A  51       1.406   8.673  -1.989  1.00 11.49           C  
ATOM    200  O   GLU A  51       2.561   8.232  -2.182  1.00  9.88           O  
ATOM    201  N   ASP A  52       0.434   8.527  -2.895  1.00 12.71           N  
ATOM    202  CA  ASP A  52       0.501   7.746  -4.139  1.00 16.56           C  
ATOM    203  C   ASP A  52       1.534   8.163  -5.130  1.00 15.83           C  
ATOM    204  O   ASP A  52       2.048   7.360  -5.898  1.00 17.21           O  
ATOM    205  N   GLY A  53       1.916   9.502  -5.127  1.00 15.00           N  
ATOM    206  CA  GLY A  53       2.824  10.061  -6.057  1.00 11.77           C  
ATOM    207  C   GLY A  53       4.254   9.817  -5.795  1.00 11.10           C  
ATOM    208  O   GLY A  53       5.111   9.999  -6.669  1.00 11.25           O  
ATOM    209  N   ARG A  54       4.504   9.235  -4.607  1.00  8.53           N  
ATOM    210  CA  ARG A  54       5.835   8.894  -4.070  1.00  9.05           C  
ATOM    211  C   ARG A  54       6.282   7.397  -4.063  1.00  8.96           C  
ATOM    212  O   ARG A  54       5.465   6.508  -4.273  1.00 11.60           O  
ATOM    213  N   THR A  55       7.603   7.100  -3.899  1.00  9.05           N  
ATOM    214  CA  THR A  55       8.005   5.650  -3.880  1.00  9.03           C  
ATOM    215  C   THR A  55       8.201   5.050  -2.527  1.00  8.15           C  
ATOM    216  O   THR A  55       8.367   5.647  -1.476  1.00  5.91           O  
ATOM    217  N   LEU A  56       8.293   3.675  -2.597  1.00  6.91           N  
ATOM    218  CA  LEU A  56       8.875   2.917  -1.501  1.00  8.29           C  
ATOM    219  C   LEU A  56      10.247   3.393  -0.991  1.00  8.05           C  
ATOM    220  O   LEU A  56      10.449   3.494   0.263  1.00 10.17           O  
ATOM    221  N   SER A  57      11.241   3.692  -1.901  1.00  8.92           N  
ATOM    222  CA  SER A  57      12.570   4.214  -1.451  1.00  9.00           C  
ATOM    223  C   SER A  57      12.555   5.630  -0.809  1.00  9.44           C  
ATOM    224  O   SER A  57      13.281   5.888   0.171  1.00 10.91           O  
ATOM    225  N   ASP A  58      11.652   6.546  -1.275  1.00  9.11           N  
ATOM    226  CA  ASP A  58      11.387   7.828  -0.664  1.00  7.91           C  
ATOM    227  C   ASP A  58      10.919   7.653   0.796  1.00  9.12           C  
ATOM    228  O   ASP A  58      11.269   8.340   1.759  1.00  8.61           O  
ATOM    229  N   TYR A  59      10.100   6.607   1.029  1.00  7.97           N  
ATOM    230  CA  TYR A  59       9.519   6.355   2.369  1.00  8.45           C  
ATOM    231  C   TYR A  59      10.349   5.385   3.136  1.00 10.98           C  
ATOM    232  O   TYR A  59      10.060   5.094   4.308  1.00 12.95           O  
ATOM    233  N   ASN A  60      11.491   4.933   2.558  1.00 12.38           N  
ATOM    234  CA  ASN A  60      12.395   3.934   3.073  1.00 13.94           C  
ATOM    235  C   ASN A  60      11.775   2.664   3.630  1.00 14.16           C  
ATOM    236  O   ASN A  60      12.040   2.167   4.732  1.00 14.26           O  
ATOM    237  N   ILE A  61      10.969   2.008   2.746  1.00 11.08           N  
ATOM    238  CA  ILE A  61      10.313   0.714   3.100  1.00 11.78           C  
ATOM    239  C   ILE A  61      11.147  -0.423   2.524  1.00 13.74           C  
ATOM    240  O   ILE A  61      11.748  -0.266   1.467  1.00 14.60           O  
ATOM    241  N   GLN A  62      11.296  -1.500   3.344  1.00 13.97           N  
ATOM    242  CA  GLN A  62      12.258  -2.519   3.103  1.00 15.52           C  
ATOM    243  C   GLN A  62      11.640  -3.806   2.774  1.00 13.94           C  
ATOM    244  O   GLN A  62      10.417  -3.993   2.768  1.00 12.15           O  
ATOM    245  N   LYS A  63      12.467  -4.845   2.358  1.00 11.73           N  
ATOM    246  CA  LYS A  63      11.877  -6.098   2.065  1.00 11.97           C  
ATOM    247  C   LYS A  63      11.398  -6.832   3.272  1.00 10.41           C  
ATOM    248  O   LYS A  63      11.923  -6.668   4.357  1.00  9.59           O  
ATOM    249  N   GLU A  64      10.210  -7.528   3.088  1.00 10.04           N  
ATOM    250  CA  GLU A  64       9.465  -8.232   4.092  1.00 10.94           C  
ATOM    251  C   GLU A  64       8.898  -7.326   5.223  1.00  9.74           C  
ATOM    252  O   GLU A  64       8.735  -7.782   6.338  1.00  9.42           O  
ATOM    253  N   SER A  65       8.589  -6.098   4.827  1.00  6.85           N  
ATOM    254  CA  SER A  65       8.077  -5.060   5.745  1.00  6.90           C  
ATOM    255  C   SER A  65       6.593  -5.068   5.634  1.00  4.72           C  
ATOM    256  O   SER A  65       6.054  -5.604   4.578  1.00  3.91           O  
ATOM    257  N   THR A  66       5.884  -4.695   6.682  1.00  4.48           N  
ATOM    258  CA  THR A  66       4.492  -4.926   6.897  1.00  3.80           C  
ATOM    259  C   THR A  66       3.802  -3.621   6.725  1.00  4.60           C  
ATOM    260  O   THR A  66       3.930  -2.682   7.472  1.00  5.33           O  
ATOM    261  N   LEU A  67       3.046  -3.513   5.586  1.00  4.17           N  
ATOM    262  CA  LEU A  67       2.223  -2.341   5.231  1.00  3.85           C  
ATOM    263  C   LEU A  67       0.819  -2.589   5.715  1.00  3.80           C  
ATOM    264  O   LEU A  67       0.340  -3.708   5.910  1.00  5.54           O  
ATOM    265  N   HIS A  68       0.085  -1.510   6.074  1.00  2.94           N  
ATOM    266  CA  HIS A  68      -1.175  -1.591   6.714  1.00  4.17           C  
ATOM    267  C   HIS A  68      -2.251  -1.001   5.780  1.00  5.32           C  
ATOM    268  O   HIS A  68      -2.112   0.107   5.313  1.00  7.70           O  
ATOM    269  N   LEU A  69      -3.364  -1.666   5.526  1.00  5.29           N  
ATOM    270  CA  LEU A  69      -4.379  -1.269   4.626  1.00  3.97           C  
ATOM    271  C   LEU A  69      -5.683  -0.972   5.347  1.00  5.07           C  
ATOM    272  O   LEU A  69      -6.272  -1.779   5.999  1.00  4.34           O  
ATOM    273  N   VAL A  70      -6.058   0.378   5.256  1.00  4.29           N  
ATOM    274  CA  VAL A  70      -7.347   0.855   5.645  1.00  6.26           C  
ATOM    275  C   VAL A  70      -8.171   1.170   4.333  1.00  9.22           C  
ATOM    276  O   VAL A  70      -7.707   1.614   3.319  1.00  9.36           O  
TER
ENDMDL
MODEL      10
ATOM      1  N   GLN A   2       9.885  -8.221  -2.122  1.00  9.27           N  
ATOM      2  CA  GLN A   2       8.664  -8.800  -1.580  1.00  9.07           C  
ATOM      3  C   GLN A   2       8.222  -8.075  -0.322  1.00  8.72           C  
ATOM      4  O   GLN A   2       9.068  -7.855   0.560  1.00  8.22           O  
ATOM      5  N   ILE A   3       6.959  -7.638  -0.276  1.00  5.87           N  
ATOM      6  CA  ILE A   3       6.406  -6.962   0.882  1.00  5.07           C  
ATOM      7  C   ILE A   3       4.986  -7.453   1.119  1.00  4.01           C  
ATOM      8  O   ILE A   3       4.322  -8.113   0.299  1.00  4.61           O  
ATOM      9  N   PHE A   4       4.505  -7.187   2.352  1.00  4.55           N  
ATOM     10  CA  PHE A   4       3.299  -7.612   2.957  1.00  4.68           C  
ATOM     11  C   PHE A   4       2.473  -6.428   3.226  1.00  5.30           C  
ATOM     12  O   PHE A   4       2.927  -5.394   3.678  1.00  5.58           O  
ATOM     13  N   VAL A   5       1.181  -6.562   2.991  1.00  4.44           N  
ATOM     14  CA  VAL A   5       0.127  -5.632   3.369  1.00  3.87           C  
ATOM     15  C   VAL A   5      -0.862  -6.384   4.278  1.00  4.93           C  
ATOM     16  O   VAL A   5      -1.234  -7.526   4.060  1.00  6.84           O  
ATOM     17  N   LYS A   6      -1.243  -5.737   5.370  1.00  6.04           N  
ATOM     18  CA  LYS A   6      -2.218  -6.368   6.269  1.00  6.12           C  
ATOM     19  C   LYS A   6      -3.514  -5.561   6.268  1.00  6.57           C  
ATOM     20  O   LYS A   6      -3.573  -4.352   6.559  1.00  5.76           O  
ATOM     21  N   THR A   7      -4.616  -6.173   5.807  1.00  7.41           N  
ATOM     22  CA  THR A   7      -5.919  -5.457   5.595  1.00  7.48           C  
ATOM     23  C   THR A   7      -6.612  -4.945   6.848  1.00  8.75           C  
ATOM     24  O   THR A   7      -6.191  -5.252   7.953  1.00  8.58           O  
ATOM     25  N   LEU A   8      -7.683  -4.129   6.736  1.00  9.84           N  
ATOM     26  CA  LEU A   8      -8.426  -3.568   7.865  1.00 14.15           C  
ATOM     27  C   LEU A   8      -9.005  -4.611   8.777  1.00 17.37           C  
ATOM     28  O   LEU A   8      -8.892  -4.545  10.042  1.00 17.01           O  
ATOM     29  N   THR A   9      -9.489  -5.729   8.244  1.00 18.33           N  
ATOM     30  CA  THR A   9     -10.149  -6.816   8.987  1.00 19.24           C  
ATOM     31  C   THR A   9      -9.288  -8.004   9.121  1.00 19.48           C  
ATOM     32  O   THR A   9      -9.681  -9.065   9.568  1.00 23.14           O  
ATOM     33  N   GLY A  10      -7.951  -7.961   8.855  1.00 19.43           N  
ATOM     34  CA  GLY A  10      -7.087  -9.043   9.023  1.00 18.74           C  
ATOM     35  C   GLY A  10      -7.089  -9.929   7.807  1.00 17.62           C  
ATOM     36  O   GLY A  10      -8.095 -10.493   7.433  1.00 19.74           O  
ATOM     37  N   LYS A  11      -5.919 -10.073   7.153  1.00 13.56           N  
ATOM     38  CA  LYS A  11      -5.519 -10.942   6.010  1.00 11.91           C  
ATOM     39  C   LYS A  11      -4.200 -10.414   5.570  1.00 10.18           C  
ATOM     40  O   LYS A  11      -4.017  -9.191   5.529  1.00  9.10           O  
ATOM     41  N   THR A  12      -3.237 -11.242   5.258  1.00  9.63           N  
ATOM     42  CA  THR A  12      -1.961 -10.961   4.671  1.00  9.85           C  
ATOM     43  C   THR A  12      -2.007 -10.985   3.147  1.00 11.66           C  
ATOM     44  O   THR A  12      -2.365 -11.992   2.517  1.00 12.33           O  
ATOM     45  N   ILE A  13      -1.584  -9.885   2.465  1.00 10.42           N  
ATOM     46  CA  ILE A  13      -1.543  -9.871   1.021  1.00 11.84           C  
ATOM     47  C   ILE A  13      -0.025  -9.801   0.736  1.00 10.55           C  
ATOM     48  O   ILE A  13       0.743  -9.042   1.284  1.00 11.92           O  
ATOM     49  N   THR A  14       0.474 -10.745  -0.057  1.00  9.39           N  
ATOM     50  CA  THR A  14       1.857 -10.796  -0.401  1.00  9.63           C  
ATOM     51  C   THR A  14       2.068 -10.082  -1.763  1.00 11.20           C  
ATOM     52  O   THR A  14       1.496 -10.474  -2.797  1.00 11.63           O  
ATOM     53  N   LEU A  15       2.912  -9.069  -1.838  1.00  8.29           N  
ATOM     54  CA  LEU A  15       3.167  -8.394  -3.065  1.00  9.03           C  
ATOM     55  C   LEU A  15       4.612  -8.676  -3.527  1.00  8.59           C  
ATOM     56  O   LEU A  15       5.514  -8.991  -2.772  1.00  7.79           O  
ATOM     57  N   GLU A  16       4.860  -8.552  -4.862  1.00 11.04           N  
ATOM     58  CA  GLU A  16       6.150  -8.392  -5.485  1.00 11.50           C  
ATOM     59  C   GLU A  16       6.255  -7.029  -6.112  1.00 10.13           C  
ATOM     60  O   GLU A  16       5.351  -6.673  -6.877  1.00  9.83           O  
ATOM     61  N   VAL A  17       7.295  -6.218  -5.755  1.00  8.99           N  
ATOM     62  CA  VAL A  17       7.385  -4.826  -6.224  1.00  8.85           C  
ATOM     63  C   VAL A  17       8.806  -4.445  -6.571  1.00  8.04           C  
ATOM     64  O   VAL A  17       9.763  -5.182  -6.197  1.00  8.99           O  
ATOM     65  N   GLU A  18       9.100  -3.328  -7.207  1.00  7.29           N  
ATOM     66  CA  GLU A  18      10.392  -2.752  -7.357  1.00  7.08           C  
ATOM     67  C   GLU A  18      10.446  -1.611  -6.388  1.00  6.45           C  
ATOM     68  O   GLU A  18       9.404  -1.050  -6.081  1.00  5.28           O  
ATOM     69  N   PRO A  19      11.589  -1.135  -5.871  1.00  7.24           N  
ATOM     70  CA  PRO A  19      11.676  -0.072  -4.826  1.00  7.07           C  
ATOM     71  C   PRO A  19      11.414   1.348  -5.408  1.00  6.65           C  
ATOM     72  O   PRO A  19      11.133   2.355  -4.708  1.00  6.37           O  
ATOM     73  N   SER A  20      11.521   1.472  -6.744  1.00  6.80           N  
ATOM     74  CA  SER A  20      11.151   2.701  -7.531  1.00  6.28           C  
ATOM     75  C   SER A  20       9.725   2.868  -7.804  1.00  8.45           C  
ATOM     76  O   SER A  20       9.366   4.027  -8.155  1.00  7.26           O  
ATOM     77  N   ASP A  21       8.834   1.866  -7.614  1.00  7.50           N  
ATOM     78  CA  ASP A  21       7.447   1.979  -7.857  1.00  7.70           C  
ATOM     79  C   ASP A  21       6.759   2.937  -6.922  1.00  7.08           C  
ATOM     80  O   ASP A  21       7.119   3.018  -5.709  1.00  8.11           O  
ATOM     81  N   THR A  22       5.759   3.651  -7.425  1.00  5.37           N  
ATOM     82  CA  THR A  22       4.998   4.597  -6.677  1.00  6.01           C  
ATOM     83  C   THR A  22       3.986   3.912  -5.781  1.00  8.01           C  
ATOM     84  O   THR A  22       3.534   2.812  -6.026  1.00  8.11           O  
ATOM     85  N   ILE A  23       3.513   4.658  -4.739  1.00  8.32           N  
ATOM     86  CA  ILE A  23       2.433   4.170  -3.873  1.00  9.92           C  
ATOM     87  C   ILE A  23       1.080   3.791  -4.545  1.00 10.01           C  
ATOM     88  O   ILE A  23       0.457   2.795  -4.251  1.00  8.71           O  
ATOM     89  N   GLU A  24       0.762   4.591  -5.567  1.00  9.54           N  
ATOM     90  CA  GLU A  24      -0.356   4.394  -6.445  1.00 11.81           C  
ATOM     91  C   GLU A  24      -0.252   3.069  -7.230  1.00 11.14           C  
ATOM     92  O   GLU A  24      -1.210   2.306  -7.323  1.00 10.62           O  
ATOM     93  N   ASN A  25       0.968   2.843  -7.802  1.00  9.43           N  
ATOM     94  CA  ASN A  25       1.367   1.638  -8.433  1.00 10.96           C  
ATOM     95  C   ASN A  25       1.253   0.419  -7.528  1.00  9.68           C  
ATOM     96  O   ASN A  25       0.848  -0.654  -7.949  1.00  9.33           O  
ATOM     97  N   VAL A  26       1.592   0.570  -6.253  1.00  6.52           N  
ATOM     98  CA  VAL A  26       1.471  -0.487  -5.238  1.00  5.53           C  
ATOM     99  C   VAL A  26       0.030  -0.785  -4.845  1.00  4.42           C  
ATOM    100  O   VAL A  26      -0.361  -1.988  -4.745  1.00  3.40           O  
ATOM    101  N   LYS A  27      -0.776   0.273  -4.740  1.00  2.64           N  
ATOM    102  CA  LYS A  27      -2.211   0.114  -4.679  1.00  4.14           C  
ATOM    103  C   LYS A  27      -2.808  -0.549  -5.961  1.00  5.58           C  
ATOM    104  O   LYS A  27      -3.765  -1.338  -5.848  1.00  4.11           O  
ATOM    105  N   ALA A  28      -2.334  -0.290  -7.178  1.00  6.61           N  
ATOM    106  CA  ALA A  28      -2.758  -0.995  -8.361  1.00  7.74           C  
ATOM    107  C   ALA A  28      -2.462  -2.497  -8.336  1.00  9.17           C  
ATOM    108  O   ALA A  28      -3.289  -3.241  -8.796  1.00 11.45           O  
ATOM    109  N   LYS A  29      -1.330  -2.967  -7.728  1.00  8.96           N  
ATOM    110  CA  LYS A  29      -1.087  -4.417  -7.378  1.00  7.90           C  
ATOM    111  C   LYS A  29      -2.123  -4.938  -6.393  1.00  6.92           C  
ATOM    112  O   LYS A  29      -2.550  -6.076  -6.481  1.00  6.87           O  
ATOM    113  N   ILE A  30      -2.473  -4.170  -5.367  1.00  4.57           N  
ATOM    114  CA  ILE A  30      -3.523  -4.551  -4.476  1.00  5.58           C  
ATOM    115  C   ILE A  30      -4.856  -4.691  -5.166  1.00  7.26           C  
ATOM    116  O   ILE A  30      -5.596  -5.610  -4.875  1.00  9.46           O  
ATOM    117  N   GLN A  31      -5.121  -3.814  -6.106  1.00  7.06           N  
ATOM    118  CA  GLN A  31      -6.243  -3.866  -6.964  1.00  8.67           C  
ATOM    119  C   GLN A  31      -6.403  -5.107  -7.769  1.00 10.90           C  
ATOM    120  O   GLN A  31      -7.547  -5.671  -7.836  1.00  9.63           O  
ATOM    121  N   ASP A  32      -5.315  -5.685  -8.305  1.00 10.93           N  
ATOM    122  CA  ASP A  32      -5.334  -7.057  -8.897  1.00 14.01           C  
ATOM    123  C   ASP A  32      -5.606  -8.212  -7.950  1.00 14.04           C  
ATOM    124  O   ASP A  32      -6.255  -9.201  -8.317  1.00 13.39           O  
ATOM    125  N   LYS A  33      -5.059  -8.172  -6.715  1.00 14.22           N  
ATOM    126  CA  LYS A  33      -5.281  -9.192  -5.675  1.00 14.00           C  
ATOM    127  C   LYS A  33      -6.635  -9.242  -5.124  1.00 12.37           C  
ATOM    128  O   LYS A  33      -7.380 -10.200  -5.127  1.00 12.17           O  
ATOM    129  N   GLU A  34      -7.140  -8.059  -4.754  1.00 10.11           N  
ATOM    130  CA  GLU A  34      -8.369  -7.916  -3.975  1.00 10.07           C  
ATOM    131  C   GLU A  34      -9.527  -7.291  -4.648  1.00  9.32           C  
ATOM    132  O   GLU A  34     -10.681  -7.428  -4.275  1.00 11.61           O  
ATOM    133  N   GLY A  35      -9.312  -6.507  -5.723  1.00  7.22           N  
ATOM    134  CA  GLY A  35     -10.401  -5.877  -6.466  1.00  6.29           C  
ATOM    135  C   GLY A  35     -10.888  -4.519  -6.033  1.00  6.93           C  
ATOM    136  O   GLY A  35     -12.024  -4.173  -6.196  1.00  7.41           O  
ATOM    137  N   ILE A  36     -10.016  -3.786  -5.378  1.00  5.86           N  
ATOM    138  CA  ILE A  36     -10.391  -2.445  -4.768  1.00  6.07           C  
ATOM    139  C   ILE A  36      -9.703  -1.326  -5.536  1.00  6.36           C  
ATOM    140  O   ILE A  36      -8.488  -1.415  -5.637  1.00  6.18           O  
ATOM    141  N   PRO A  37     -10.317  -0.295  -6.092  1.00  8.65           N  
ATOM    142  CA  PRO A  37      -9.657   0.839  -6.760  1.00  9.18           C  
ATOM    143  C   PRO A  37      -8.550   1.479  -5.904  1.00  9.85           C  
ATOM    144  O   PRO A  37      -8.854   1.596  -4.723  1.00  8.51           O  
ATOM    145  N   PRO A  38      -7.415   1.979  -6.345  1.00  8.71           N  
ATOM    146  CA  PRO A  38      -6.516   2.778  -5.513  1.00  9.08           C  
ATOM    147  C   PRO A  38      -7.126   3.983  -4.721  1.00  9.28           C  
ATOM    148  O   PRO A  38      -6.619   4.332  -3.660  1.00  6.50           O  
ATOM    149  N   ASP A  39      -8.301   4.535  -5.170  1.00 11.20           N  
ATOM    150  CA  ASP A  39      -8.993   5.623  -4.533  1.00 14.96           C  
ATOM    151  C   ASP A  39      -9.710   5.184  -3.289  1.00 13.99           C  
ATOM    152  O   ASP A  39     -10.011   5.909  -2.326  1.00 13.75           O  
ATOM    153  N   GLN A  40      -9.988   3.878  -3.226  1.00 11.60           N  
ATOM    154  CA  GLN A  40     -10.691   3.285  -2.087  1.00 10.76           C  
ATOM    155  C   GLN A  40      -9.633   2.663  -1.134  1.00  8.01           C  
ATOM    156  O   GLN A  40      -9.921   2.008  -0.154  1.00  8.96           O  
ATOM    157  N   GLN A  41      -8.357   2.880  -1.346  1.00  6.52           N  
ATOM    158  CA  GLN A  41      -7.277   2.384  -0.478  1.00  3.87           C  
ATOM    159  C   GLN A  41      -6.548   3.479   0.286  1.00  4.79           C  
ATOM    160  O   GLN A  41      -5.909   4.354  -0.344  1.00  6.34           O  
ATOM    161  N   ARG A  42      -6.409   3.373   1.622  1.00  5.73           N  
ATOM    162  CA  ARG A  42      -5.376   4.089   2.373  1.00  6.97           C  
ATOM    163  C   ARG A  42      -4.306   3.123   2.806  1.00  7.15           C  
ATOM    164  O   ARG A  42      -4.493   1.939   3.087  1.00  7.33           O  
ATOM    165  N   LEU A  43      -3.023   3.581   2.856  1.00  4.65           N  
ATOM    166  CA  LEU A  43      -1.933   2.696   3.220  1.00  3.51           C  
ATOM    167  C   LEU A  43      -1.190   3.311   4.387  1.00  5.56           C  
ATOM    168  O   LEU A  43      -0.793   4.471   4.345  1.00  4.19           O  
ATOM    169  N   ILE A  44      -0.943   2.474   5.423  1.00  4.58           N  
ATOM    170  CA  ILE A  44      -0.334   2.980   6.597  1.00  5.55           C  
ATOM    171  C   ILE A  44       0.998   2.296   6.698  1.00  5.46           C  
ATOM    172  O   ILE A  44       1.013   1.062   6.729  1.00  6.04           O  
ATOM    173  N   PHE A  45       2.128   3.032   6.803  1.00  6.75           N  
ATOM    174  CA  PHE A  45       3.467   2.486   7.045  1.00  4.70           C  
ATOM    175  C   PHE A  45       4.035   3.226   8.285  1.00  6.34           C  
ATOM    176  O   PHE A  45       4.177   4.450   8.231  1.00  5.45           O  
ATOM    177  N   ALA A  46       4.320   2.517   9.387  1.00  6.53           N  
ATOM    178  CA  ALA A  46       4.863   3.091  10.668  1.00  7.15           C  
ATOM    179  C   ALA A  46       4.693   4.524  11.058  1.00  9.00           C  
ATOM    180  O   ALA A  46       5.573   5.353  10.998  1.00 11.15           O  
ATOM    181  N   GLY A  47       3.482   4.914  11.289  1.00  9.35           N  
ATOM    182  CA  GLY A  47       3.121   6.303  11.660  1.00 11.68           C  
ATOM    183  C   GLY A  47       2.947   7.308  10.537  1.00 11.14           C  
ATOM    184  O   GLY A  47       2.815   8.518  10.766  1.00 13.93           O  
ATOM    185  N   LYS A  48       3.066   6.825   9.284  1.00 10.47           N  
ATOM    186  CA  LYS A  48       2.810   7.662   8.129  1.00  8.82           C  
ATOM    187  C   LYS A  48       1.640   7.161   7.401  1.00  7.68           C  
ATOM    188  O   LYS A  48       1.528   5.999   6.981  1.00  6.47           O  
ATOM    189  N   GLN A  49       0.667   7.991   7.199  1.00  8.89           N  
ATOM    190  CA  GLN A  49      -0.321   7.763   6.146  1.00  7.18           C  
ATOM    191  C   GLN A  49       0.203   8.140   4.774  1.00  8.23           C  
ATOM    192  O   GLN A  49       0.668   9.265   4.614  1.00  9.70           O  
ATOM    193  N   LEU A  50       0.234   7.240   3.799  1.00  6.51           N  
ATOM    194  CA  LEU A  50       1.013   7.368   2.572  1.00  7.41           C  
ATOM    195  C   LEU A  50       0.314   8.160   1.444  1.00  8.27           C  
ATOM    196  O   LEU A  50      -0.881   8.143   1.332  1.00  8.34           O  
ATOM    197  N   GLU A  51       1.131   8.863   0.585  1.00  9.43           N  
ATOM    198  CA  GLU A  51       0.686   9.601  -0.580  1.00 11.90           C  
ATOM    199  C   GLU A  51       1.069   8.863  -1.866  1.00 11.49           C  
ATOM    200  O   GLU A  51       2.138   8.294  -1.977  1.00  9.88           O  
ATOM    201  N   ASP A  52       0.087   8.841  -2.779  1.00 12.71           N  
ATOM    202  CA  ASP A  52      -0.063   8.176  -3.998  1.00 16.56           C  
ATOM    203  C   ASP A  52       1.123   8.380  -4.986  1.00 15.83           C  
ATOM    204  O   ASP A  52       1.678   7.422  -5.522  1.00 17.21           O  
ATOM    205  N   GLY A  53       1.576   9.672  -5.136  1.00 15.00           N  
ATOM    206  CA  GLY A  53       2.590  10.000  -6.165  1.00 11.77           C  
ATOM    207  C   GLY A  53       4.035   9.819  -5.827  1.00 11.10           C  
ATOM    208  O   GLY A  53       4.854   9.777  -6.718  1.00 11.25           O  
ATOM    209  N   ARG A  54       4.316   9.713  -4.547  1.00  8.53           N  
ATOM    210  CA  ARG A  54       5.535   9.289  -3.936  1.00  9.05           C  
ATOM    211  C   ARG A  54       6.006   7.829  -4.474  1.00  8.96           C  
ATOM    212  O   ARG A  54       5.209   7.082  -4.977  1.00 11.60           O  
ATOM    213  N   THR A  55       7.236   7.441  -4.119  1.00  9.05           N  
ATOM    214  CA  THR A  55       7.758   6.048  -4.205  1.00  9.03           C  
ATOM    215  C   THR A  55       7.824   5.314  -2.851  1.00  8.15           C  
ATOM    216  O   THR A  55       7.760   5.853  -1.753  1.00  5.91           O  
ATOM    217  N   LEU A  56       8.005   3.990  -3.001  1.00  6.91           N  
ATOM    218  CA  LEU A  56       8.309   3.194  -1.799  1.00  8.29           C  
ATOM    219  C   LEU A  56       9.552   3.593  -1.036  1.00  8.05           C  
ATOM    220  O   LEU A  56       9.592   3.608   0.209  1.00 10.17           O  
ATOM    221  N   SER A  57      10.593   3.975  -1.838  1.00  8.92           N  
ATOM    222  CA  SER A  57      11.849   4.259  -1.253  1.00  9.00           C  
ATOM    223  C   SER A  57      11.883   5.590  -0.544  1.00  9.44           C  
ATOM    224  O   SER A  57      12.743   5.781   0.309  1.00 10.91           O  
ATOM    225  N   ASP A  58      10.970   6.540  -0.887  1.00  9.11           N  
ATOM    226  CA  ASP A  58      10.863   7.807  -0.193  1.00  7.91           C  
ATOM    227  C   ASP A  58      10.411   7.584   1.207  1.00  9.12           C  
ATOM    228  O   ASP A  58      10.707   8.386   2.085  1.00  8.61           O  
ATOM    229  N   TYR A  59       9.822   6.430   1.498  1.00  7.97           N  
ATOM    230  CA  TYR A  59       9.163   6.153   2.802  1.00  8.45           C  
ATOM    231  C   TYR A  59       9.946   5.237   3.639  1.00 10.98           C  
ATOM    232  O   TYR A  59       9.590   5.072   4.801  1.00 12.95           O  
ATOM    233  N   ASN A  60      11.041   4.663   3.099  1.00 12.38           N  
ATOM    234  CA  ASN A  60      11.953   3.724   3.694  1.00 13.94           C  
ATOM    235  C   ASN A  60      11.338   2.328   3.774  1.00 14.16           C  
ATOM    236  O   ASN A  60      11.522   1.585   4.662  1.00 14.26           O  
ATOM    237  N   ILE A  61      10.574   1.982   2.739  1.00 11.08           N  
ATOM    238  CA  ILE A  61       9.975   0.629   2.684  1.00 11.78           C  
ATOM    239  C   ILE A  61      10.961  -0.275   1.959  1.00 13.74           C  
ATOM    240  O   ILE A  61      11.522  -0.025   0.834  1.00 14.60           O  
ATOM    241  N   GLN A  62      11.257  -1.381   2.662  1.00 13.97           N  
ATOM    242  CA  GLN A  62      12.351  -2.288   2.334  1.00 15.52           C  
ATOM    243  C   GLN A  62      11.914  -3.705   2.379  1.00 13.94           C  
ATOM    244  O   GLN A  62      10.755  -3.955   2.756  1.00 12.15           O  
ATOM    245  N   LYS A  63      12.761  -4.681   1.961  1.00 11.73           N  
ATOM    246  CA  LYS A  63      12.559  -6.121   1.997  1.00 11.97           C  
ATOM    247  C   LYS A  63      11.779  -6.607   3.193  1.00 10.41           C  
ATOM    248  O   LYS A  63      11.971  -6.305   4.376  1.00  9.59           O  
ATOM    249  N   GLU A  64      10.735  -7.410   2.828  1.00 10.04           N  
ATOM    250  CA  GLU A  64       9.823  -7.948   3.731  1.00 10.94           C  
ATOM    251  C   GLU A  64       9.048  -7.042   4.701  1.00  9.74           C  
ATOM    252  O   GLU A  64       8.486  -7.516   5.658  1.00  9.42           O  
ATOM    253  N   SER A  65       9.036  -5.680   4.444  1.00  6.85           N  
ATOM    254  CA  SER A  65       8.286  -4.702   5.256  1.00  6.90           C  
ATOM    255  C   SER A  65       6.776  -5.032   5.270  1.00  4.72           C  
ATOM    256  O   SER A  65       6.211  -5.600   4.326  1.00  3.91           O  
ATOM    257  N   THR A  66       6.157  -4.677   6.394  1.00  4.48           N  
ATOM    258  CA  THR A  66       4.792  -4.874   6.656  1.00  3.80           C  
ATOM    259  C   THR A  66       4.179  -3.502   6.528  1.00  4.60           C  
ATOM    260  O   THR A  66       4.360  -2.538   7.291  1.00  5.33           O  
ATOM    261  N   LEU A  67       3.249  -3.429   5.528  1.00  4.17           N  
ATOM    262  CA  LEU A  67       2.354  -2.311   5.335  1.00  3.85           C  
ATOM    263  C   LEU A  67       0.975  -2.698   5.886  1.00  3.80           C  
ATOM    264  O   LEU A  67       0.649  -3.866   6.103  1.00  5.54           O  
ATOM    265  N   HIS A  68       0.070  -1.688   6.136  1.00  2.94           N  
ATOM    266  CA  HIS A  68      -1.308  -1.879   6.587  1.00  4.17           C  
ATOM    267  C   HIS A  68      -2.190  -1.278   5.506  1.00  5.32           C  
ATOM    268  O   HIS A  68      -1.794  -0.356   4.746  1.00  7.70           O  
ATOM    269  N   LEU A  69      -3.397  -1.792   5.224  1.00  5.29           N  
ATOM    270  CA  LEU A  69      -4.301  -1.250   4.196  1.00  3.97           C  
ATOM    271  C   LEU A  69      -5.590  -0.955   4.879  1.00  5.07           C  
ATOM    272  O   LEU A  69      -6.043  -1.786   5.675  1.00  4.34           O  
ATOM    273  N   VAL A  70      -6.230   0.215   4.642  1.00  4.29           N  
ATOM    274  CA  VAL A  70      -7.443   0.593   5.283  1.00  6.26           C  
ATOM    275  C   VAL A  70      -8.411   1.019   4.187  1.00  9.22           C  
ATOM    276  O   VAL A  70      -8.034   1.875   3.366  1.00  9.36           O  
TER
ENDMDL
MODEL      11
ATOM      1  N   GLN A   2       9.978  -8.249  -2.084  1.00  9.27           N  
ATOM      2  CA  GLN A   2       8.681  -8.754  -1.679  1.00  9.07           C  
ATOM      3  C   GLN A   2       8.222  -8.008  -0.479  1.00  8.72           C  
ATOM      4  O   GLN A   2       9.055  -7.680   0.372  1.00  8.22           O  
ATOM      5  N   ILE A   3       6.972  -7.576  -0.464  1.00  5.87           N  
ATOM      6  CA  ILE A   3       6.360  -6.880   0.668  1.00  5.07           C  
ATOM      7  C   ILE A   3       5.030  -7.440   1.042  1.00  4.01           C  
ATOM      8  O   ILE A   3       4.320  -8.021   0.226  1.00  4.61           O  
ATOM      9  N   PHE A   4       4.588  -7.196   2.285  1.00  4.55           N  
ATOM     10  CA  PHE A   4       3.407  -7.848   2.854  1.00  4.68           C  
ATOM     11  C   PHE A   4       2.485  -6.682   3.154  1.00  5.30           C  
ATOM     12  O   PHE A   4       2.919  -5.567   3.439  1.00  5.58           O  
ATOM     13  N   VAL A   5       1.163  -6.868   3.009  1.00  4.44           N  
ATOM     14  CA  VAL A   5       0.185  -5.834   3.319  1.00  3.87           C  
ATOM     15  C   VAL A   5      -0.907  -6.526   4.148  1.00  4.93           C  
ATOM     16  O   VAL A   5      -1.429  -7.576   3.805  1.00  6.84           O  
ATOM     17  N   LYS A   6      -1.259  -5.933   5.275  1.00  6.04           N  
ATOM     18  CA  LYS A   6      -2.329  -6.303   6.176  1.00  6.12           C  
ATOM     19  C   LYS A   6      -3.546  -5.478   6.101  1.00  6.57           C  
ATOM     20  O   LYS A   6      -3.495  -4.244   6.029  1.00  5.76           O  
ATOM     21  N   THR A   7      -4.679  -6.250   6.022  1.00  7.41           N  
ATOM     22  CA  THR A   7      -5.979  -5.617   5.628  1.00  7.48           C  
ATOM     23  C   THR A   7      -6.985  -5.734   6.725  1.00  8.75           C  
ATOM     24  O   THR A   7      -6.675  -6.163   7.861  1.00  8.58           O  
ATOM     25  N   LEU A   8      -8.182  -5.304   6.508  1.00  9.84           N  
ATOM     26  CA  LEU A   8      -9.212  -5.065   7.471  1.00 14.15           C  
ATOM     27  C   LEU A   8      -9.749  -6.236   8.214  1.00 17.37           C  
ATOM     28  O   LEU A   8     -10.069  -6.090   9.396  1.00 17.01           O  
ATOM     29  N   THR A   9     -10.032  -7.410   7.585  1.00 18.33           N  
ATOM     30  CA  THR A   9     -10.422  -8.641   8.338  1.00 19.24           C  
ATOM     31  C   THR A   9      -9.276  -9.474   8.770  1.00 19.48           C  
ATOM     32  O   THR A   9      -9.480 -10.649   9.040  1.00 23.14           O  
ATOM     33  N   GLY A  10      -8.081  -8.915   8.901  1.00 19.43           N  
ATOM     34  CA  GLY A  10      -6.975  -9.601   9.620  1.00 18.74           C  
ATOM     35  C   GLY A  10      -6.105 -10.370   8.691  1.00 17.62           C  
ATOM     36  O   GLY A  10      -5.099 -10.951   9.062  1.00 19.74           O  
ATOM     37  N   LYS A  11      -6.547 -10.287   7.343  1.00 13.56           N  
ATOM     38  CA  LYS A  11      -5.911 -10.863   6.184  1.00 11.91           C  
ATOM     39  C   LYS A  11      -4.553 -10.317   5.754  1.00 10.18           C  
ATOM     40  O   LYS A  11      -4.379  -9.098   5.662  1.00  9.10           O  
ATOM     41  N   THR A  12      -3.589 -11.185   5.427  1.00  9.63           N  
ATOM     42  CA  THR A  12      -2.265 -10.754   5.008  1.00  9.85           C  
ATOM     43  C   THR A  12      -2.043 -11.202   3.583  1.00 11.66           C  
ATOM     44  O   THR A  12      -2.178 -12.372   3.179  1.00 12.33           O  
ATOM     45  N   ILE A  13      -1.679 -10.253   2.710  1.00 10.42           N  
ATOM     46  CA  ILE A  13      -1.386 -10.475   1.316  1.00 11.84           C  
ATOM     47  C   ILE A  13       0.064 -10.073   1.041  1.00 10.55           C  
ATOM     48  O   ILE A  13       0.676  -9.129   1.592  1.00 11.92           O  
ATOM     49  N   THR A  14       0.773 -10.933   0.153  1.00  9.39           N  
ATOM     50  CA  THR A  14       2.130 -10.723  -0.287  1.00  9.63           C  
ATOM     51  C   THR A  14       2.140 -10.177  -1.631  1.00 11.20           C  
ATOM     52  O   THR A  14       1.321 -10.510  -2.474  1.00 11.63           O  
ATOM     53  N   LEU A  15       3.011  -9.166  -1.907  1.00  8.29           N  
ATOM     54  CA  LEU A  15       3.223  -8.519  -3.200  1.00  9.03           C  
ATOM     55  C   LEU A  15       4.683  -8.479  -3.650  1.00  8.59           C  
ATOM     56  O   LEU A  15       5.569  -8.354  -2.814  1.00  7.79           O  
ATOM     57  N   GLU A  16       4.989  -8.618  -4.977  1.00 11.04           N  
ATOM     58  CA  GLU A  16       6.287  -8.448  -5.546  1.00 11.50           C  
ATOM     59  C   GLU A  16       6.419  -7.012  -6.050  1.00 10.13           C  
ATOM     60  O   GLU A  16       5.584  -6.467  -6.824  1.00  9.83           O  
ATOM     61  N   VAL A  17       7.431  -6.278  -5.553  1.00  8.99           N  
ATOM     62  CA  VAL A  17       7.579  -4.836  -5.785  1.00  8.85           C  
ATOM     63  C   VAL A  17       9.069  -4.487  -6.101  1.00  8.04           C  
ATOM     64  O   VAL A  17       9.910  -5.348  -5.833  1.00  8.99           O  
ATOM     65  N   GLU A  18       9.414  -3.286  -6.629  1.00  7.29           N  
ATOM     66  CA  GLU A  18      10.788  -2.814  -6.505  1.00  7.08           C  
ATOM     67  C   GLU A  18      10.815  -1.475  -5.764  1.00  6.45           C  
ATOM     68  O   GLU A  18       9.784  -0.811  -5.642  1.00  5.28           O  
ATOM     69  N   PRO A  19      11.949  -1.013  -5.085  1.00  7.24           N  
ATOM     70  CA  PRO A  19      11.980   0.281  -4.284  1.00  7.07           C  
ATOM     71  C   PRO A  19      11.425   1.546  -4.971  1.00  6.65           C  
ATOM     72  O   PRO A  19      10.956   2.486  -4.322  1.00  6.37           O  
ATOM     73  N   SER A  20      11.527   1.505  -6.314  1.00  6.80           N  
ATOM     74  CA  SER A  20      11.174   2.576  -7.236  1.00  6.28           C  
ATOM     75  C   SER A  20       9.661   2.607  -7.512  1.00  8.45           C  
ATOM     76  O   SER A  20       9.222   3.497  -8.187  1.00  7.26           O  
ATOM     77  N   ASP A  21       8.854   1.582  -7.095  1.00  7.50           N  
ATOM     78  CA  ASP A  21       7.381   1.535  -7.071  1.00  7.70           C  
ATOM     79  C   ASP A  21       6.811   2.559  -6.188  1.00  7.08           C  
ATOM     80  O   ASP A  21       7.216   2.776  -5.059  1.00  8.11           O  
ATOM     81  N   THR A  22       5.895   3.314  -6.759  1.00  5.37           N  
ATOM     82  CA  THR A  22       5.092   4.247  -6.008  1.00  6.01           C  
ATOM     83  C   THR A  22       3.914   3.590  -5.401  1.00  8.01           C  
ATOM     84  O   THR A  22       3.440   2.521  -5.823  1.00  8.11           O  
ATOM     85  N   ILE A  23       3.396   4.271  -4.367  1.00  8.32           N  
ATOM     86  CA  ILE A  23       2.236   3.851  -3.592  1.00  9.92           C  
ATOM     87  C   ILE A  23       1.102   3.656  -4.490  1.00 10.01           C  
ATOM     88  O   ILE A  23       0.328   2.725  -4.282  1.00  8.71           O  
ATOM     89  N   GLU A  24       0.897   4.471  -5.567  1.00  9.54           N  
ATOM     90  CA  GLU A  24      -0.079   4.222  -6.584  1.00 11.81           C  
ATOM     91  C   GLU A  24       0.049   2.852  -7.337  1.00 11.14           C  
ATOM     92  O   GLU A  24      -0.901   2.057  -7.397  1.00 10.62           O  
ATOM     93  N   ASN A  25       1.298   2.453  -7.733  1.00  9.43           N  
ATOM     94  CA  ASN A  25       1.707   1.153  -8.239  1.00 10.96           C  
ATOM     95  C   ASN A  25       1.331   0.021  -7.295  1.00  9.68           C  
ATOM     96  O   ASN A  25       0.721  -0.960  -7.745  1.00  9.33           O  
ATOM     97  N   VAL A  26       1.672   0.154  -6.052  1.00  6.52           N  
ATOM     98  CA  VAL A  26       1.293  -0.708  -4.911  1.00  5.53           C  
ATOM     99  C   VAL A  26      -0.201  -0.902  -4.772  1.00  4.42           C  
ATOM    100  O   VAL A  26      -0.654  -2.017  -4.776  1.00  3.40           O  
ATOM    101  N   LYS A  27      -0.989   0.217  -4.827  1.00  2.64           N  
ATOM    102  CA  LYS A  27      -2.433   0.026  -4.799  1.00  4.14           C  
ATOM    103  C   LYS A  27      -2.986  -0.764  -6.014  1.00  5.58           C  
ATOM    104  O   LYS A  27      -3.967  -1.524  -5.854  1.00  4.11           O  
ATOM    105  N   ALA A  28      -2.484  -0.545  -7.234  1.00  6.61           N  
ATOM    106  CA  ALA A  28      -2.836  -1.136  -8.510  1.00  7.74           C  
ATOM    107  C   ALA A  28      -2.590  -2.651  -8.537  1.00  9.17           C  
ATOM    108  O   ALA A  28      -3.368  -3.470  -8.954  1.00 11.45           O  
ATOM    109  N   LYS A  29      -1.419  -3.085  -7.955  1.00  8.96           N  
ATOM    110  CA  LYS A  29      -1.026  -4.486  -7.679  1.00  7.90           C  
ATOM    111  C   LYS A  29      -2.011  -5.163  -6.710  1.00  6.92           C  
ATOM    112  O   LYS A  29      -2.402  -6.295  -6.900  1.00  6.87           O  
ATOM    113  N   ILE A  30      -2.385  -4.396  -5.627  1.00  4.57           N  
ATOM    114  CA  ILE A  30      -3.360  -4.848  -4.594  1.00  5.58           C  
ATOM    115  C   ILE A  30      -4.734  -4.977  -5.283  1.00  7.26           C  
ATOM    116  O   ILE A  30      -5.397  -5.941  -5.120  1.00  9.46           O  
ATOM    117  N   GLN A  31      -5.127  -3.939  -6.058  1.00  7.06           N  
ATOM    118  CA  GLN A  31      -6.370  -3.952  -6.831  1.00  8.67           C  
ATOM    119  C   GLN A  31      -6.514  -5.188  -7.772  1.00 10.90           C  
ATOM    120  O   GLN A  31      -7.540  -5.873  -7.832  1.00  9.63           O  
ATOM    121  N   ASP A  32      -5.401  -5.490  -8.452  1.00 10.93           N  
ATOM    122  CA  ASP A  32      -5.405  -6.679  -9.280  1.00 14.01           C  
ATOM    123  C   ASP A  32      -5.524  -7.947  -8.470  1.00 14.04           C  
ATOM    124  O   ASP A  32      -6.060  -8.924  -8.961  1.00 13.39           O  
ATOM    125  N   LYS A  33      -5.017  -7.967  -7.223  1.00 14.22           N  
ATOM    126  CA  LYS A  33      -5.238  -9.076  -6.347  1.00 14.00           C  
ATOM    127  C   LYS A  33      -6.607  -9.086  -5.680  1.00 12.37           C  
ATOM    128  O   LYS A  33      -7.300 -10.076  -5.755  1.00 12.17           O  
ATOM    129  N   GLU A  34      -7.083  -7.989  -5.099  1.00 10.11           N  
ATOM    130  CA  GLU A  34      -8.196  -7.944  -4.165  1.00 10.07           C  
ATOM    131  C   GLU A  34      -9.414  -7.107  -4.616  1.00  9.32           C  
ATOM    132  O   GLU A  34     -10.418  -6.992  -3.863  1.00 11.61           O  
ATOM    133  N   GLY A  35      -9.315  -6.515  -5.790  1.00  7.22           N  
ATOM    134  CA  GLY A  35     -10.393  -5.754  -6.421  1.00  6.29           C  
ATOM    135  C   GLY A  35     -10.721  -4.407  -5.891  1.00  6.93           C  
ATOM    136  O   GLY A  35     -11.704  -3.820  -6.370  1.00  7.41           O  
ATOM    137  N   ILE A  36      -9.856  -3.871  -5.004  1.00  5.86           N  
ATOM    138  CA  ILE A  36     -10.062  -2.609  -4.288  1.00  6.07           C  
ATOM    139  C   ILE A  36      -9.765  -1.345  -5.112  1.00  6.36           C  
ATOM    140  O   ILE A  36      -8.643  -1.130  -5.568  1.00  6.18           O  
ATOM    141  N   PRO A  37     -10.657  -0.405  -5.375  1.00  8.65           N  
ATOM    142  CA  PRO A  37     -10.310   0.868  -5.993  1.00  9.18           C  
ATOM    143  C   PRO A  37      -9.178   1.696  -5.286  1.00  9.85           C  
ATOM    144  O   PRO A  37      -9.374   1.913  -4.079  1.00  8.51           O  
ATOM    145  N   PRO A  38      -8.122   2.133  -6.064  1.00  8.71           N  
ATOM    146  CA  PRO A  38      -7.034   2.957  -5.493  1.00  9.08           C  
ATOM    147  C   PRO A  38      -7.369   4.238  -4.763  1.00  9.28           C  
ATOM    148  O   PRO A  38      -6.586   4.558  -3.811  1.00  6.50           O  
ATOM    149  N   ASP A  39      -8.428   4.976  -5.119  1.00 11.20           N  
ATOM    150  CA  ASP A  39      -8.884   6.121  -4.323  1.00 14.96           C  
ATOM    151  C   ASP A  39      -9.593   5.707  -2.999  1.00 13.99           C  
ATOM    152  O   ASP A  39      -9.685   6.526  -2.093  1.00 13.75           O  
ATOM    153  N   GLN A  40     -10.135   4.479  -2.835  1.00 11.60           N  
ATOM    154  CA  GLN A  40     -10.783   3.921  -1.640  1.00 10.76           C  
ATOM    155  C   GLN A  40      -9.748   3.377  -0.700  1.00  8.01           C  
ATOM    156  O   GLN A  40     -10.044   3.220   0.497  1.00  8.96           O  
ATOM    157  N   GLN A  41      -8.527   3.044  -1.221  1.00  6.52           N  
ATOM    158  CA  GLN A  41      -7.310   2.602  -0.505  1.00  3.87           C  
ATOM    159  C   GLN A  41      -6.681   3.698   0.279  1.00  4.79           C  
ATOM    160  O   GLN A  41      -6.612   4.849  -0.215  1.00  6.34           O  
ATOM    161  N   ARG A  42      -6.391   3.385   1.592  1.00  5.73           N  
ATOM    162  CA  ARG A  42      -5.594   4.281   2.387  1.00  6.97           C  
ATOM    163  C   ARG A  42      -4.446   3.428   2.972  1.00  7.15           C  
ATOM    164  O   ARG A  42      -4.638   2.599   3.834  1.00  7.33           O  
ATOM    165  N   LEU A  43      -3.220   3.699   2.507  1.00  4.65           N  
ATOM    166  CA  LEU A  43      -2.004   2.951   2.941  1.00  3.51           C  
ATOM    167  C   LEU A  43      -1.133   3.646   3.910  1.00  5.56           C  
ATOM    168  O   LEU A  43      -0.760   4.780   3.790  1.00  4.19           O  
ATOM    169  N   ILE A  44      -0.831   2.886   4.962  1.00  4.58           N  
ATOM    170  CA  ILE A  44      -0.250   3.281   6.204  1.00  5.55           C  
ATOM    171  C   ILE A  44       1.041   2.523   6.506  1.00  5.46           C  
ATOM    172  O   ILE A  44       1.114   1.320   6.282  1.00  6.04           O  
ATOM    173  N   PHE A  45       2.125   3.223   6.959  1.00  6.75           N  
ATOM    174  CA  PHE A  45       3.359   2.576   7.498  1.00  4.70           C  
ATOM    175  C   PHE A  45       4.159   3.600   8.302  1.00  6.34           C  
ATOM    176  O   PHE A  45       4.383   4.674   7.736  1.00  5.45           O  
ATOM    177  N   ALA A  46       4.559   3.192   9.586  1.00  6.53           N  
ATOM    178  CA  ALA A  46       5.419   3.978  10.432  1.00  7.15           C  
ATOM    179  C   ALA A  46       4.688   5.153  11.094  1.00  9.00           C  
ATOM    180  O   ALA A  46       5.237   6.241  11.237  1.00 11.15           O  
ATOM    181  N   GLY A  47       3.470   4.960  11.571  1.00  9.35           N  
ATOM    182  CA  GLY A  47       2.793   5.967  12.310  1.00 11.68           C  
ATOM    183  C   GLY A  47       2.066   6.892  11.410  1.00 11.14           C  
ATOM    184  O   GLY A  47       1.514   7.887  11.894  1.00 13.93           O  
ATOM    185  N   LYS A  48       2.089   6.696  10.043  1.00 10.47           N  
ATOM    186  CA  LYS A  48       1.602   7.671   9.052  1.00  8.82           C  
ATOM    187  C   LYS A  48       1.122   7.099   7.743  1.00  7.68           C  
ATOM    188  O   LYS A  48       1.297   5.953   7.395  1.00  6.47           O  
ATOM    189  N   GLN A  49       0.487   7.937   6.948  1.00  8.89           N  
ATOM    190  CA  GLN A  49      -0.163   7.576   5.730  1.00  7.18           C  
ATOM    191  C   GLN A  49       0.631   8.057   4.588  1.00  8.23           C  
ATOM    192  O   GLN A  49       1.265   9.118   4.643  1.00  9.70           O  
ATOM    193  N   LEU A  50       0.713   7.243   3.529  1.00  6.51           N  
ATOM    194  CA  LEU A  50       1.619   7.425   2.412  1.00  7.41           C  
ATOM    195  C   LEU A  50       0.999   8.019   1.212  1.00  8.27           C  
ATOM    196  O   LEU A  50      -0.121   7.715   0.779  1.00  8.34           O  
ATOM    197  N   GLU A  51       1.641   9.054   0.599  1.00  9.43           N  
ATOM    198  CA  GLU A  51       1.131   9.649  -0.611  1.00 11.90           C  
ATOM    199  C   GLU A  51       1.251   8.726  -1.853  1.00 11.49           C  
ATOM    200  O   GLU A  51       2.220   7.967  -2.025  1.00  9.88           O  
ATOM    201  N   ASP A  52       0.260   8.836  -2.742  1.00 12.71           N  
ATOM    202  CA  ASP A  52       0.128   8.012  -3.954  1.00 16.56           C  
ATOM    203  C   ASP A  52       1.279   8.112  -4.939  1.00 15.83           C  
ATOM    204  O   ASP A  52       1.752   7.192  -5.492  1.00 17.21           O  
ATOM    205  N   GLY A  53       1.844   9.289  -5.165  1.00 15.00           N  
ATOM    206  CA  GLY A  53       2.885   9.523  -6.137  1.00 11.77           C  
ATOM    207  C   GLY A  53       4.252   9.309  -5.608  1.00 11.10           C  
ATOM    208  O   GLY A  53       5.249   9.529  -6.294  1.00 11.25           O  
ATOM    209  N   ARG A  54       4.353   8.917  -4.323  1.00  8.53           N  
ATOM    210  CA  ARG A  54       5.533   8.786  -3.584  1.00  9.05           C  
ATOM    211  C   ARG A  54       5.956   7.332  -3.609  1.00  8.96           C  
ATOM    212  O   ARG A  54       5.190   6.364  -3.653  1.00 11.60           O  
ATOM    213  N   THR A  55       7.305   7.113  -3.667  1.00  9.05           N  
ATOM    214  CA  THR A  55       7.872   5.747  -3.792  1.00  9.03           C  
ATOM    215  C   THR A  55       8.143   5.074  -2.463  1.00  8.15           C  
ATOM    216  O   THR A  55       8.156   5.658  -1.420  1.00  5.91           O  
ATOM    217  N   LEU A  56       8.453   3.742  -2.438  1.00  6.91           N  
ATOM    218  CA  LEU A  56       8.769   2.875  -1.357  1.00  8.29           C  
ATOM    219  C   LEU A  56      10.090   3.357  -0.799  1.00  8.05           C  
ATOM    220  O   LEU A  56      10.265   3.481   0.402  1.00 10.17           O  
ATOM    221  N   SER A  57      11.057   3.750  -1.687  1.00  8.92           N  
ATOM    222  CA  SER A  57      12.352   4.283  -1.260  1.00  9.00           C  
ATOM    223  C   SER A  57      12.310   5.603  -0.529  1.00  9.44           C  
ATOM    224  O   SER A  57      12.990   5.806   0.432  1.00 10.91           O  
ATOM    225  N   ASP A  58      11.376   6.507  -0.891  1.00  9.11           N  
ATOM    226  CA  ASP A  58      11.139   7.791  -0.242  1.00  7.91           C  
ATOM    227  C   ASP A  58      10.679   7.703   1.164  1.00  9.12           C  
ATOM    228  O   ASP A  58      10.889   8.599   1.982  1.00  8.61           O  
ATOM    229  N   TYR A  59       9.978   6.605   1.501  1.00  7.97           N  
ATOM    230  CA  TYR A  59       9.548   6.334   2.877  1.00  8.45           C  
ATOM    231  C   TYR A  59      10.544   5.361   3.500  1.00 10.98           C  
ATOM    232  O   TYR A  59      10.249   4.866   4.552  1.00 12.95           O  
ATOM    233  N   ASN A  60      11.660   4.957   2.798  1.00 12.38           N  
ATOM    234  CA  ASN A  60      12.660   4.014   3.268  1.00 13.94           C  
ATOM    235  C   ASN A  60      12.027   2.672   3.649  1.00 14.16           C  
ATOM    236  O   ASN A  60      12.409   2.081   4.673  1.00 14.26           O  
ATOM    237  N   ILE A  61      11.104   2.169   2.804  1.00 11.08           N  
ATOM    238  CA  ILE A  61      10.486   0.867   2.983  1.00 11.78           C  
ATOM    239  C   ILE A  61      11.310  -0.197   2.289  1.00 13.74           C  
ATOM    240  O   ILE A  61      11.697  -0.089   1.153  1.00 14.60           O  
ATOM    241  N   GLN A  62      11.612  -1.261   3.014  1.00 13.97           N  
ATOM    242  CA  GLN A  62      12.665  -2.199   2.597  1.00 15.52           C  
ATOM    243  C   GLN A  62      12.156  -3.594   2.608  1.00 13.94           C  
ATOM    244  O   GLN A  62      11.108  -3.847   3.206  1.00 12.15           O  
ATOM    245  N   LYS A  63      12.843  -4.536   1.933  1.00 11.73           N  
ATOM    246  CA  LYS A  63      12.451  -5.927   1.787  1.00 11.97           C  
ATOM    247  C   LYS A  63      11.842  -6.577   3.014  1.00 10.41           C  
ATOM    248  O   LYS A  63      12.319  -6.501   4.141  1.00  9.59           O  
ATOM    249  N   GLU A  64      10.741  -7.282   2.745  1.00 10.04           N  
ATOM    250  CA  GLU A  64       9.959  -8.183   3.663  1.00 10.94           C  
ATOM    251  C   GLU A  64       9.507  -7.387   4.798  1.00  9.74           C  
ATOM    252  O   GLU A  64       9.830  -7.626   5.980  1.00  9.42           O  
ATOM    253  N   SER A  65       8.746  -6.305   4.562  1.00  6.85           N  
ATOM    254  CA  SER A  65       8.243  -5.403   5.566  1.00  6.90           C  
ATOM    255  C   SER A  65       6.777  -5.276   5.207  1.00  4.72           C  
ATOM    256  O   SER A  65       6.322  -5.744   4.167  1.00  3.91           O  
ATOM    257  N   THR A  66       6.054  -4.615   6.101  1.00  4.48           N  
ATOM    258  CA  THR A  66       4.608  -4.838   6.325  1.00  3.80           C  
ATOM    259  C   THR A  66       3.855  -3.562   6.349  1.00  4.60           C  
ATOM    260  O   THR A  66       3.948  -2.761   7.257  1.00  5.33           O  
ATOM    261  N   LEU A  67       3.030  -3.361   5.257  1.00  4.17           N  
ATOM    262  CA  LEU A  67       2.238  -2.226   5.137  1.00  3.85           C  
ATOM    263  C   LEU A  67       0.875  -2.524   5.788  1.00  3.80           C  
ATOM    264  O   LEU A  67       0.291  -3.569   5.599  1.00  5.54           O  
ATOM    265  N   HIS A  68       0.307  -1.435   6.359  1.00  2.94           N  
ATOM    266  CA  HIS A  68      -1.078  -1.451   6.773  1.00  4.17           C  
ATOM    267  C   HIS A  68      -1.799  -0.737   5.696  1.00  5.32           C  
ATOM    268  O   HIS A  68      -1.365   0.243   5.119  1.00  7.70           O  
ATOM    269  N   LEU A  69      -2.939  -1.311   5.452  1.00  5.29           N  
ATOM    270  CA  LEU A  69      -3.963  -0.938   4.513  1.00  3.97           C  
ATOM    271  C   LEU A  69      -5.288  -0.865   5.230  1.00  5.07           C  
ATOM    272  O   LEU A  69      -5.740  -1.893   5.771  1.00  4.34           O  
ATOM    273  N   VAL A  70      -5.934   0.286   5.219  1.00  4.29           N  
ATOM    274  CA  VAL A  70      -7.285   0.474   5.795  1.00  6.26           C  
ATOM    275  C   VAL A  70      -8.033   1.086   4.696  1.00  9.22           C  
ATOM    276  O   VAL A  70      -7.415   1.608   3.795  1.00  9.36           O  
TER
ENDMDL
MODEL      12
ATOM      1  N   GLN A   2      10.139  -7.830  -1.765  1.00  9.27           N  
ATOM      2  CA  GLN A   2       8.898  -8.428  -1.295  1.00  9.07           C  
ATOM      3  C   GLN A   2       8.376  -7.653  -0.128  1.00  8.72           C  
ATOM      4  O   GLN A   2       9.145  -7.244   0.734  1.00  8.22           O  
ATOM      5  N   ILE A   3       7.074  -7.385  -0.063  1.00  5.87           N  
ATOM      6  CA  ILE A   3       6.483  -6.654   1.033  1.00  5.07           C  
ATOM      7  C   ILE A   3       5.157  -7.256   1.347  1.00  4.01           C  
ATOM      8  O   ILE A   3       4.634  -7.990   0.582  1.00  4.61           O  
ATOM      9  N   PHE A   4       4.646  -7.007   2.564  1.00  4.55           N  
ATOM     10  CA  PHE A   4       3.342  -7.598   2.997  1.00  4.68           C  
ATOM     11  C   PHE A   4       2.339  -6.432   3.090  1.00  5.30           C  
ATOM     12  O   PHE A   4       2.745  -5.267   3.274  1.00  5.58           O  
ATOM     13  N   VAL A   5       1.032  -6.647   2.995  1.00  4.44           N  
ATOM     14  CA  VAL A   5      -0.013  -5.672   3.223  1.00  3.87           C  
ATOM     15  C   VAL A   5      -1.174  -6.310   4.028  1.00  4.93           C  
ATOM     16  O   VAL A   5      -1.722  -7.337   3.644  1.00  6.84           O  
ATOM     17  N   LYS A   6      -1.500  -5.666   5.178  1.00  6.04           N  
ATOM     18  CA  LYS A   6      -2.352  -6.274   6.151  1.00  6.12           C  
ATOM     19  C   LYS A   6      -3.680  -5.572   6.197  1.00  6.57           C  
ATOM     20  O   LYS A   6      -3.812  -4.341   6.312  1.00  5.76           O  
ATOM     21  N   THR A   7      -4.842  -6.355   6.099  1.00  7.41           N  
ATOM     22  CA  THR A   7      -6.157  -5.775   5.994  1.00  7.48           C  
ATOM     23  C   THR A   7      -6.957  -5.721   7.325  1.00  8.75           C  
ATOM     24  O   THR A   7      -6.689  -6.349   8.343  1.00  8.58           O  
ATOM     25  N   LEU A   8      -8.153  -5.093   7.337  1.00  9.84           N  
ATOM     26  CA  LEU A   8      -9.094  -5.010   8.475  1.00 14.15           C  
ATOM     27  C   LEU A   8     -10.001  -6.223   8.389  1.00 17.37           C  
ATOM     28  O   LEU A   8     -11.065  -6.279   9.039  1.00 17.01           O  
ATOM     29  N   THR A   9      -9.700  -7.172   7.555  1.00 18.33           N  
ATOM     30  CA  THR A   9     -10.505  -8.384   7.491  1.00 19.24           C  
ATOM     31  C   THR A   9      -9.526  -9.429   7.969  1.00 19.48           C  
ATOM     32  O   THR A   9      -9.856 -10.651   7.892  1.00 23.14           O  
ATOM     33  N   GLY A  10      -8.295  -9.141   8.452  1.00 19.43           N  
ATOM     34  CA  GLY A  10      -7.357 -10.160   8.968  1.00 18.74           C  
ATOM     35  C   GLY A  10      -6.647 -10.968   7.923  1.00 17.62           C  
ATOM     36  O   GLY A  10      -6.029 -11.995   8.215  1.00 19.74           O  
ATOM     37  N   LYS A  11      -6.653 -10.466   6.647  1.00 13.56           N  
ATOM     38  CA  LYS A  11      -5.934 -11.115   5.552  1.00 11.91           C  
ATOM     39  C   LYS A  11      -4.533 -10.469   5.369  1.00 10.18           C  
ATOM     40  O   LYS A  11      -4.320  -9.229   5.587  1.00  9.10           O  
ATOM     41  N   THR A  12      -3.513 -11.243   4.936  1.00  9.63           N  
ATOM     42  CA  THR A  12      -2.135 -10.780   4.564  1.00  9.85           C  
ATOM     43  C   THR A  12      -1.911 -10.959   3.024  1.00 11.66           C  
ATOM     44  O   THR A  12      -1.904 -12.053   2.481  1.00 12.33           O  
ATOM     45  N   ILE A  13      -1.719  -9.848   2.373  1.00 10.42           N  
ATOM     46  CA  ILE A  13      -1.356  -9.759   0.962  1.00 11.84           C  
ATOM     47  C   ILE A  13       0.094  -9.793   0.812  1.00 10.55           C  
ATOM     48  O   ILE A  13       0.761  -9.118   1.655  1.00 11.92           O  
ATOM     49  N   THR A  14       0.695 -10.462  -0.215  1.00  9.39           N  
ATOM     50  CA  THR A  14       2.102 -10.519  -0.469  1.00  9.63           C  
ATOM     51  C   THR A  14       2.334  -9.952  -1.842  1.00 11.20           C  
ATOM     52  O   THR A  14       1.741 -10.511  -2.778  1.00 11.63           O  
ATOM     53  N   LEU A  15       3.262  -8.977  -2.001  1.00  8.29           N  
ATOM     54  CA  LEU A  15       3.450  -8.326  -3.205  1.00  9.03           C  
ATOM     55  C   LEU A  15       4.956  -8.255  -3.507  1.00  8.59           C  
ATOM     56  O   LEU A  15       5.765  -8.031  -2.664  1.00  7.79           O  
ATOM     57  N   GLU A  16       5.313  -8.416  -4.726  1.00 11.04           N  
ATOM     58  CA  GLU A  16       6.606  -8.236  -5.249  1.00 11.50           C  
ATOM     59  C   GLU A  16       6.783  -6.998  -6.150  1.00 10.13           C  
ATOM     60  O   GLU A  16       6.113  -6.829  -7.160  1.00  9.83           O  
ATOM     61  N   VAL A  17       7.666  -6.065  -5.814  1.00  8.99           N  
ATOM     62  CA  VAL A  17       7.641  -4.676  -6.342  1.00  8.85           C  
ATOM     63  C   VAL A  17       9.113  -4.192  -6.438  1.00  8.04           C  
ATOM     64  O   VAL A  17      10.071  -4.682  -5.800  1.00  8.99           O  
ATOM     65  N   GLU A  18       9.404  -3.154  -7.255  1.00  7.29           N  
ATOM     66  CA  GLU A  18      10.611  -2.399  -7.254  1.00  7.08           C  
ATOM     67  C   GLU A  18      10.668  -1.383  -6.072  1.00  6.45           C  
ATOM     68  O   GLU A  18       9.610  -0.790  -5.825  1.00  5.28           O  
ATOM     69  N   PRO A  19      11.817  -1.016  -5.428  1.00  7.24           N  
ATOM     70  CA  PRO A  19      11.920   0.180  -4.642  1.00  7.07           C  
ATOM     71  C   PRO A  19      11.674   1.469  -5.366  1.00  6.65           C  
ATOM     72  O   PRO A  19      11.135   2.459  -4.772  1.00  6.37           O  
ATOM     73  N   SER A  20      12.017   1.524  -6.698  1.00  6.80           N  
ATOM     74  CA  SER A  20      11.745   2.700  -7.520  1.00  6.28           C  
ATOM     75  C   SER A  20      10.330   2.736  -8.121  1.00  8.45           C  
ATOM     76  O   SER A  20      10.159   3.217  -9.209  1.00  7.26           O  
ATOM     77  N   ASP A  21       9.281   2.122  -7.422  1.00  7.50           N  
ATOM     78  CA  ASP A  21       7.887   2.015  -7.901  1.00  7.70           C  
ATOM     79  C   ASP A  21       7.038   2.921  -7.061  1.00  7.08           C  
ATOM     80  O   ASP A  21       7.241   3.086  -5.879  1.00  8.11           O  
ATOM     81  N   THR A  22       5.980   3.465  -7.647  1.00  5.37           N  
ATOM     82  CA  THR A  22       5.073   4.273  -6.881  1.00  6.01           C  
ATOM     83  C   THR A  22       4.087   3.624  -5.958  1.00  8.01           C  
ATOM     84  O   THR A  22       3.732   2.444  -6.117  1.00  8.11           O  
ATOM     85  N   ILE A  23       3.617   4.406  -4.972  1.00  8.32           N  
ATOM     86  CA  ILE A  23       2.622   3.917  -3.966  1.00  9.92           C  
ATOM     87  C   ILE A  23       1.303   3.596  -4.641  1.00 10.01           C  
ATOM     88  O   ILE A  23       0.621   2.602  -4.404  1.00  8.71           O  
ATOM     89  N   GLU A  24       0.968   4.422  -5.659  1.00  9.54           N  
ATOM     90  CA  GLU A  24      -0.150   4.160  -6.567  1.00 11.81           C  
ATOM     91  C   GLU A  24      -0.031   2.833  -7.288  1.00 11.14           C  
ATOM     92  O   GLU A  24      -1.060   2.189  -7.551  1.00 10.62           O  
ATOM     93  N   ASN A  25       1.212   2.385  -7.681  1.00  9.43           N  
ATOM     94  CA  ASN A  25       1.369   1.154  -8.416  1.00 10.96           C  
ATOM     95  C   ASN A  25       1.273  -0.022  -7.469  1.00  9.68           C  
ATOM     96  O   ASN A  25       0.718  -1.041  -7.786  1.00  9.33           O  
ATOM     97  N   VAL A  26       1.570   0.187  -6.173  1.00  6.52           N  
ATOM     98  CA  VAL A  26       1.229  -0.757  -5.067  1.00  5.53           C  
ATOM     99  C   VAL A  26      -0.288  -0.899  -4.927  1.00  4.42           C  
ATOM    100  O   VAL A  26      -0.812  -2.005  -4.871  1.00  3.40           O  
ATOM    101  N   LYS A  27      -1.046   0.226  -4.882  1.00  2.64           N  
ATOM    102  CA  LYS A  27      -2.466   0.148  -4.854  1.00  4.14           C  
ATOM    103  C   LYS A  27      -3.098  -0.482  -6.118  1.00  5.58           C  
ATOM    104  O   LYS A  27      -4.159  -1.098  -6.056  1.00  4.11           O  
ATOM    105  N   ALA A  28      -2.460  -0.371  -7.314  1.00  6.61           N  
ATOM    106  CA  ALA A  28      -2.793  -1.106  -8.516  1.00  7.74           C  
ATOM    107  C   ALA A  28      -2.530  -2.614  -8.484  1.00  9.17           C  
ATOM    108  O   ALA A  28      -3.348  -3.404  -9.017  1.00 11.45           O  
ATOM    109  N   LYS A  29      -1.458  -3.038  -7.848  1.00  8.96           N  
ATOM    110  CA  LYS A  29      -1.208  -4.433  -7.509  1.00  7.90           C  
ATOM    111  C   LYS A  29      -2.163  -4.946  -6.441  1.00  6.92           C  
ATOM    112  O   LYS A  29      -2.623  -6.101  -6.521  1.00  6.87           O  
ATOM    113  N   ILE A  30      -2.583  -4.056  -5.494  1.00  4.57           N  
ATOM    114  CA  ILE A  30      -3.595  -4.453  -4.452  1.00  5.58           C  
ATOM    115  C   ILE A  30      -4.968  -4.571  -5.130  1.00  7.26           C  
ATOM    116  O   ILE A  30      -5.805  -5.445  -4.866  1.00  9.46           O  
ATOM    117  N   GLN A  31      -5.246  -3.767  -6.204  1.00  7.06           N  
ATOM    118  CA  GLN A  31      -6.411  -3.826  -7.049  1.00  8.67           C  
ATOM    119  C   GLN A  31      -6.453  -5.147  -7.726  1.00 10.90           C  
ATOM    120  O   GLN A  31      -7.458  -5.889  -7.695  1.00  9.63           O  
ATOM    121  N   ASP A  32      -5.322  -5.528  -8.250  1.00 10.93           N  
ATOM    122  CA  ASP A  32      -5.128  -6.737  -8.995  1.00 14.01           C  
ATOM    123  C   ASP A  32      -5.420  -7.996  -8.113  1.00 14.04           C  
ATOM    124  O   ASP A  32      -6.042  -8.972  -8.589  1.00 13.39           O  
ATOM    125  N   LYS A  33      -4.918  -8.076  -6.901  1.00 14.22           N  
ATOM    126  CA  LYS A  33      -5.219  -9.114  -5.933  1.00 14.00           C  
ATOM    127  C   LYS A  33      -6.632  -9.148  -5.412  1.00 12.37           C  
ATOM    128  O   LYS A  33      -7.262 -10.185  -5.347  1.00 12.17           O  
ATOM    129  N   GLU A  34      -7.218  -8.005  -4.992  1.00 10.11           N  
ATOM    130  CA  GLU A  34      -8.449  -8.065  -4.170  1.00 10.07           C  
ATOM    131  C   GLU A  34      -9.532  -7.221  -4.763  1.00  9.32           C  
ATOM    132  O   GLU A  34     -10.581  -7.055  -4.143  1.00 11.61           O  
ATOM    133  N   GLY A  35      -9.368  -6.689  -5.972  1.00  7.22           N  
ATOM    134  CA  GLY A  35     -10.539  -6.189  -6.663  1.00  6.29           C  
ATOM    135  C   GLY A  35     -10.999  -4.887  -6.089  1.00  6.93           C  
ATOM    136  O   GLY A  35     -12.070  -4.371  -6.369  1.00  7.41           O  
ATOM    137  N   ILE A  36     -10.191  -4.204  -5.223  1.00  5.86           N  
ATOM    138  CA  ILE A  36     -10.633  -2.994  -4.592  1.00  6.07           C  
ATOM    139  C   ILE A  36     -10.064  -1.768  -5.290  1.00  6.36           C  
ATOM    140  O   ILE A  36      -8.821  -1.637  -5.434  1.00  6.18           O  
ATOM    141  N   PRO A  37     -10.858  -0.843  -5.809  1.00  8.65           N  
ATOM    142  CA  PRO A  37     -10.377   0.441  -6.330  1.00  9.18           C  
ATOM    143  C   PRO A  37      -9.272   1.165  -5.596  1.00  9.85           C  
ATOM    144  O   PRO A  37      -9.475   1.428  -4.392  1.00  8.51           O  
ATOM    145  N   PRO A  38      -8.189   1.686  -6.182  1.00  8.71           N  
ATOM    146  CA  PRO A  38      -7.105   2.251  -5.414  1.00  9.08           C  
ATOM    147  C   PRO A  38      -7.533   3.407  -4.520  1.00  9.28           C  
ATOM    148  O   PRO A  38      -6.993   3.610  -3.426  1.00  6.50           O  
ATOM    149  N   ASP A  39      -8.550   4.168  -5.017  1.00 11.20           N  
ATOM    150  CA  ASP A  39      -9.190   5.310  -4.398  1.00 14.96           C  
ATOM    151  C   ASP A  39      -9.860   4.917  -3.039  1.00 13.99           C  
ATOM    152  O   ASP A  39     -10.067   5.780  -2.147  1.00 13.75           O  
ATOM    153  N   GLN A  40     -10.092   3.600  -2.769  1.00 11.60           N  
ATOM    154  CA  GLN A  40     -10.681   3.096  -1.557  1.00 10.76           C  
ATOM    155  C   GLN A  40      -9.613   2.419  -0.649  1.00  8.01           C  
ATOM    156  O   GLN A  40      -9.959   1.837   0.373  1.00  8.96           O  
ATOM    157  N   GLN A  41      -8.303   2.524  -0.996  1.00  6.52           N  
ATOM    158  CA  GLN A  41      -7.259   2.084  -0.175  1.00  3.87           C  
ATOM    159  C   GLN A  41      -6.481   3.254   0.353  1.00  4.79           C  
ATOM    160  O   GLN A  41      -5.941   4.027  -0.443  1.00  6.34           O  
ATOM    161  N   ARG A  42      -6.458   3.400   1.671  1.00  5.73           N  
ATOM    162  CA  ARG A  42      -5.450   4.214   2.371  1.00  6.97           C  
ATOM    163  C   ARG A  42      -4.386   3.238   2.945  1.00  7.15           C  
ATOM    164  O   ARG A  42      -4.631   2.261   3.629  1.00  7.33           O  
ATOM    165  N   LEU A  43      -3.130   3.524   2.655  1.00  4.65           N  
ATOM    166  CA  LEU A  43      -2.052   2.534   3.012  1.00  3.51           C  
ATOM    167  C   LEU A  43      -1.277   3.354   4.044  1.00  5.56           C  
ATOM    168  O   LEU A  43      -0.943   4.544   3.855  1.00  4.19           O  
ATOM    169  N   ILE A  44      -0.939   2.639   5.113  1.00  4.58           N  
ATOM    170  CA  ILE A  44      -0.121   3.107   6.218  1.00  5.55           C  
ATOM    171  C   ILE A  44       1.144   2.296   6.417  1.00  5.46           C  
ATOM    172  O   ILE A  44       1.081   1.047   6.380  1.00  6.04           O  
ATOM    173  N   PHE A  45       2.326   2.943   6.509  1.00  6.75           N  
ATOM    174  CA  PHE A  45       3.593   2.351   6.794  1.00  4.70           C  
ATOM    175  C   PHE A  45       4.066   2.958   8.044  1.00  6.34           C  
ATOM    176  O   PHE A  45       4.209   4.202   8.069  1.00  5.45           O  
ATOM    177  N   ALA A  46       4.306   2.249   9.090  1.00  6.53           N  
ATOM    178  CA  ALA A  46       4.884   2.640  10.406  1.00  7.15           C  
ATOM    179  C   ALA A  46       4.212   3.898  11.049  1.00  9.00           C  
ATOM    180  O   ALA A  46       4.867   4.840  11.517  1.00 11.15           O  
ATOM    181  N   GLY A  47       2.837   3.861  11.094  1.00  9.35           N  
ATOM    182  CA  GLY A  47       2.010   4.975  11.547  1.00 11.68           C  
ATOM    183  C   GLY A  47       1.777   6.054  10.559  1.00 11.14           C  
ATOM    184  O   GLY A  47       1.005   6.978  10.827  1.00 13.93           O  
ATOM    185  N   LYS A  48       2.372   6.017   9.367  1.00 10.47           N  
ATOM    186  CA  LYS A  48       2.295   7.135   8.446  1.00  8.82           C  
ATOM    187  C   LYS A  48       1.609   6.772   7.185  1.00  7.68           C  
ATOM    188  O   LYS A  48       1.817   5.657   6.666  1.00  6.47           O  
ATOM    189  N   GLN A  49       0.715   7.670   6.666  1.00  8.89           N  
ATOM    190  CA  GLN A  49       0.115   7.604   5.350  1.00  7.18           C  
ATOM    191  C   GLN A  49       1.101   7.616   4.169  1.00  8.23           C  
ATOM    192  O   GLN A  49       2.084   8.315   4.219  1.00  9.70           O  
ATOM    193  N   LEU A  50       0.832   6.828   3.149  1.00  6.51           N  
ATOM    194  CA  LEU A  50       1.611   6.760   1.926  1.00  7.41           C  
ATOM    195  C   LEU A  50       0.873   7.464   0.824  1.00  8.27           C  
ATOM    196  O   LEU A  50      -0.321   7.223   0.459  1.00  8.34           O  
ATOM    197  N   GLU A  51       1.500   8.455   0.168  1.00  9.43           N  
ATOM    198  CA  GLU A  51       0.840   9.347  -0.859  1.00 11.90           C  
ATOM    199  C   GLU A  51       1.204   8.758  -2.214  1.00 11.49           C  
ATOM    200  O   GLU A  51       2.397   8.384  -2.430  1.00  9.88           O  
ATOM    201  N   ASP A  52       0.261   8.686  -3.132  1.00 12.71           N  
ATOM    202  CA  ASP A  52       0.173   8.046  -4.483  1.00 16.56           C  
ATOM    203  C   ASP A  52       1.344   8.352  -5.480  1.00 15.83           C  
ATOM    204  O   ASP A  52       1.911   7.419  -6.048  1.00 17.21           O  
ATOM    205  N   GLY A  53       1.681   9.661  -5.644  1.00 15.00           N  
ATOM    206  CA  GLY A  53       2.634  10.148  -6.574  1.00 11.77           C  
ATOM    207  C   GLY A  53       4.004  10.327  -5.895  1.00 11.10           C  
ATOM    208  O   GLY A  53       4.725  11.249  -6.256  1.00 11.25           O  
ATOM    209  N   ARG A  54       4.396   9.333  -5.036  1.00  8.53           N  
ATOM    210  CA  ARG A  54       5.714   9.202  -4.463  1.00  9.05           C  
ATOM    211  C   ARG A  54       6.114   7.673  -4.523  1.00  8.96           C  
ATOM    212  O   ARG A  54       5.276   6.821  -4.819  1.00 11.60           O  
ATOM    213  N   THR A  55       7.395   7.303  -4.271  1.00  9.05           N  
ATOM    214  CA  THR A  55       7.812   5.911  -4.417  1.00  9.03           C  
ATOM    215  C   THR A  55       8.097   5.200  -3.126  1.00  8.15           C  
ATOM    216  O   THR A  55       8.163   5.816  -2.046  1.00  5.91           O  
ATOM    217  N   LEU A  56       8.247   3.824  -3.127  1.00  6.91           N  
ATOM    218  CA  LEU A  56       8.505   2.969  -1.952  1.00  8.29           C  
ATOM    219  C   LEU A  56       9.876   3.301  -1.242  1.00  8.05           C  
ATOM    220  O   LEU A  56       9.929   3.357  -0.026  1.00 10.17           O  
ATOM    221  N   SER A  57      10.926   3.578  -2.068  1.00  8.92           N  
ATOM    222  CA  SER A  57      12.217   4.063  -1.536  1.00  9.00           C  
ATOM    223  C   SER A  57      12.122   5.410  -0.829  1.00  9.44           C  
ATOM    224  O   SER A  57      12.801   5.649   0.188  1.00 10.91           O  
ATOM    225  N   ASP A  58      11.335   6.362  -1.369  1.00  9.11           N  
ATOM    226  CA  ASP A  58      11.128   7.670  -0.747  1.00  7.91           C  
ATOM    227  C   ASP A  58      10.615   7.666   0.692  1.00  9.12           C  
ATOM    228  O   ASP A  58      10.794   8.583   1.483  1.00  8.61           O  
ATOM    229  N   TYR A  59       9.987   6.582   1.118  1.00  7.97           N  
ATOM    230  CA  TYR A  59       9.469   6.418   2.457  1.00  8.45           C  
ATOM    231  C   TYR A  59      10.347   5.384   3.253  1.00 10.98           C  
ATOM    232  O   TYR A  59       9.942   4.972   4.327  1.00 12.95           O  
ATOM    233  N   ASN A  60      11.520   4.962   2.693  1.00 12.38           N  
ATOM    234  CA  ASN A  60      12.567   4.051   3.120  1.00 13.94           C  
ATOM    235  C   ASN A  60      12.011   2.658   3.486  1.00 14.16           C  
ATOM    236  O   ASN A  60      12.337   2.077   4.529  1.00 14.26           O  
ATOM    237  N   ILE A  61      11.155   2.047   2.610  1.00 11.08           N  
ATOM    238  CA  ILE A  61      10.608   0.747   2.856  1.00 11.78           C  
ATOM    239  C   ILE A  61      11.588  -0.289   2.308  1.00 13.74           C  
ATOM    240  O   ILE A  61      11.989  -0.186   1.178  1.00 14.60           O  
ATOM    241  N   GLN A  62      11.993  -1.260   3.159  1.00 13.97           N  
ATOM    242  CA  GLN A  62      12.896  -2.298   2.794  1.00 15.52           C  
ATOM    243  C   GLN A  62      12.132  -3.617   2.615  1.00 13.94           C  
ATOM    244  O   GLN A  62      10.967  -3.672   2.897  1.00 12.15           O  
ATOM    245  N   LYS A  63      12.787  -4.724   2.223  1.00 11.73           N  
ATOM    246  CA  LYS A  63      12.017  -5.974   2.027  1.00 11.97           C  
ATOM    247  C   LYS A  63      11.430  -6.612   3.298  1.00 10.41           C  
ATOM    248  O   LYS A  63      12.012  -6.568   4.405  1.00  9.59           O  
ATOM    249  N   GLU A  64      10.298  -7.280   3.199  1.00 10.04           N  
ATOM    250  CA  GLU A  64       9.512  -7.962   4.246  1.00 10.94           C  
ATOM    251  C   GLU A  64       8.799  -7.015   5.316  1.00  9.74           C  
ATOM    252  O   GLU A  64       8.381  -7.304   6.445  1.00  9.42           O  
ATOM    253  N   SER A  65       8.770  -5.764   4.945  1.00  6.85           N  
ATOM    254  CA  SER A  65       8.035  -4.718   5.580  1.00  6.90           C  
ATOM    255  C   SER A  65       6.553  -5.030   5.456  1.00  4.72           C  
ATOM    256  O   SER A  65       6.066  -5.539   4.454  1.00  3.91           O  
ATOM    257  N   THR A  66       5.816  -4.707   6.526  1.00  4.48           N  
ATOM    258  CA  THR A  66       4.350  -4.882   6.501  1.00  3.80           C  
ATOM    259  C   THR A  66       3.673  -3.532   6.385  1.00  4.60           C  
ATOM    260  O   THR A  66       4.033  -2.589   7.081  1.00  5.33           O  
ATOM    261  N   LEU A  67       2.798  -3.413   5.410  1.00  4.17           N  
ATOM    262  CA  LEU A  67       1.972  -2.222   5.215  1.00  3.85           C  
ATOM    263  C   LEU A  67       0.593  -2.456   5.802  1.00  3.80           C  
ATOM    264  O   LEU A  67       0.071  -3.561   5.772  1.00  5.54           O  
ATOM    265  N   HIS A  68      -0.121  -1.440   6.244  1.00  2.94           N  
ATOM    266  CA  HIS A  68      -1.399  -1.566   6.874  1.00  4.17           C  
ATOM    267  C   HIS A  68      -2.441  -1.008   6.015  1.00  5.32           C  
ATOM    268  O   HIS A  68      -2.363   0.138   5.596  1.00  7.70           O  
ATOM    269  N   LEU A  69      -3.432  -1.778   5.532  1.00  5.29           N  
ATOM    270  CA  LEU A  69      -4.445  -1.339   4.602  1.00  3.97           C  
ATOM    271  C   LEU A  69      -5.664  -0.806   5.409  1.00  5.07           C  
ATOM    272  O   LEU A  69      -6.170  -1.510   6.288  1.00  4.34           O  
ATOM    273  N   VAL A  70      -6.050   0.468   5.209  1.00  4.29           N  
ATOM    274  CA  VAL A  70      -7.237   0.994   5.885  1.00  6.26           C  
ATOM    275  C   VAL A  70      -8.165   1.336   4.776  1.00  9.22           C  
ATOM    276  O   VAL A  70      -7.880   2.080   3.845  1.00  9.36           O  
TER
ENDMDL
MODEL      13
ATOM      1  N   GLN A   2       9.560  -9.221  -2.236  1.00  9.27           N  
ATOM      2  CA  GLN A   2       8.326  -9.359  -1.526  1.00  9.07           C  
ATOM      3  C   GLN A   2       8.049  -8.392  -0.408  1.00  8.72           C  
ATOM      4  O   GLN A   2       8.920  -8.051   0.360  1.00  8.22           O  
ATOM      5  N   ILE A   3       6.794  -7.933  -0.250  1.00  5.87           N  
ATOM      6  CA  ILE A   3       6.320  -7.028   0.864  1.00  5.07           C  
ATOM      7  C   ILE A   3       4.905  -7.516   1.251  1.00  4.01           C  
ATOM      8  O   ILE A   3       4.296  -8.250   0.498  1.00  4.61           O  
ATOM      9  N   PHE A   4       4.502  -7.178   2.465  1.00  4.55           N  
ATOM     10  CA  PHE A   4       3.255  -7.622   3.034  1.00  4.68           C  
ATOM     11  C   PHE A   4       2.290  -6.525   3.354  1.00  5.30           C  
ATOM     12  O   PHE A   4       2.725  -5.495   3.901  1.00  5.58           O  
ATOM     13  N   VAL A   5       0.987  -6.666   2.915  1.00  4.44           N  
ATOM     14  CA  VAL A   5      -0.037  -5.708   3.129  1.00  3.87           C  
ATOM     15  C   VAL A   5      -1.029  -6.309   4.083  1.00  4.93           C  
ATOM     16  O   VAL A   5      -1.489  -7.443   3.792  1.00  6.84           O  
ATOM     17  N   LYS A   6      -1.268  -5.654   5.216  1.00  6.04           N  
ATOM     18  CA  LYS A   6      -2.018  -6.253   6.319  1.00  6.12           C  
ATOM     19  C   LYS A   6      -3.160  -5.335   6.739  1.00  6.57           C  
ATOM     20  O   LYS A   6      -3.281  -4.194   6.279  1.00  5.76           O  
ATOM     21  N   THR A   7      -4.152  -5.795   7.538  1.00  7.41           N  
ATOM     22  CA  THR A   7      -5.347  -5.019   8.010  1.00  7.48           C  
ATOM     23  C   THR A   7      -5.612  -5.208   9.477  1.00  8.75           C  
ATOM     24  O   THR A   7      -5.085  -6.096  10.105  1.00  8.58           O  
ATOM     25  N   LEU A   8      -6.454  -4.333  10.060  1.00  9.84           N  
ATOM     26  CA  LEU A   8      -6.895  -4.418  11.425  1.00 14.15           C  
ATOM     27  C   LEU A   8      -7.387  -5.819  11.870  1.00 17.37           C  
ATOM     28  O   LEU A   8      -7.058  -6.371  12.917  1.00 17.01           O  
ATOM     29  N   THR A   9      -8.114  -6.517  11.007  1.00 18.33           N  
ATOM     30  CA  THR A   9      -8.661  -7.891  11.213  1.00 19.24           C  
ATOM     31  C   THR A   9      -7.708  -8.922  10.713  1.00 19.48           C  
ATOM     32  O   THR A   9      -7.933 -10.114  10.790  1.00 23.14           O  
ATOM     33  N   GLY A  10      -6.505  -8.550  10.395  1.00 19.43           N  
ATOM     34  CA  GLY A  10      -5.395  -9.470  10.283  1.00 18.74           C  
ATOM     35  C   GLY A  10      -5.155 -10.188   8.980  1.00 17.62           C  
ATOM     36  O   GLY A  10      -4.203 -10.950   8.853  1.00 19.74           O  
ATOM     37  N   LYS A  11      -5.954  -9.891   7.935  1.00 13.56           N  
ATOM     38  CA  LYS A  11      -5.766 -10.378   6.593  1.00 11.91           C  
ATOM     39  C   LYS A  11      -4.393 -10.044   6.032  1.00 10.18           C  
ATOM     40  O   LYS A  11      -4.014  -8.867   6.074  1.00  9.10           O  
ATOM     41  N   THR A  12      -3.620 -11.006   5.388  1.00  9.63           N  
ATOM     42  CA  THR A  12      -2.235 -10.801   4.868  1.00  9.85           C  
ATOM     43  C   THR A  12      -2.275 -11.129   3.406  1.00 11.66           C  
ATOM     44  O   THR A  12      -2.567 -12.205   2.908  1.00 12.33           O  
ATOM     45  N   ILE A  13      -1.947 -10.115   2.594  1.00 10.42           N  
ATOM     46  CA  ILE A  13      -1.581 -10.393   1.196  1.00 11.84           C  
ATOM     47  C   ILE A  13      -0.200 -10.028   0.871  1.00 10.55           C  
ATOM     48  O   ILE A  13       0.420  -9.201   1.624  1.00 11.92           O  
ATOM     49  N   THR A  14       0.386 -10.672  -0.172  1.00  9.39           N  
ATOM     50  CA  THR A  14       1.815 -10.644  -0.448  1.00  9.63           C  
ATOM     51  C   THR A  14       2.152 -10.131  -1.830  1.00 11.20           C  
ATOM     52  O   THR A  14       1.687 -10.631  -2.864  1.00 11.63           O  
ATOM     53  N   LEU A  15       2.864  -8.987  -1.941  1.00  8.29           N  
ATOM     54  CA  LEU A  15       3.116  -8.378  -3.186  1.00  9.03           C  
ATOM     55  C   LEU A  15       4.631  -8.415  -3.548  1.00  8.59           C  
ATOM     56  O   LEU A  15       5.484  -8.345  -2.708  1.00  7.79           O  
ATOM     57  N   GLU A  16       4.934  -8.571  -4.799  1.00 11.04           N  
ATOM     58  CA  GLU A  16       6.256  -8.374  -5.370  1.00 11.50           C  
ATOM     59  C   GLU A  16       6.246  -6.934  -5.904  1.00 10.13           C  
ATOM     60  O   GLU A  16       5.349  -6.522  -6.654  1.00  9.83           O  
ATOM     61  N   VAL A  17       7.267  -6.106  -5.509  1.00  8.99           N  
ATOM     62  CA  VAL A  17       7.482  -4.759  -5.913  1.00  8.85           C  
ATOM     63  C   VAL A  17       8.981  -4.486  -6.198  1.00  8.04           C  
ATOM     64  O   VAL A  17       9.859  -5.286  -5.892  1.00  8.99           O  
ATOM     65  N   GLU A  18       9.346  -3.304  -6.661  1.00  7.29           N  
ATOM     66  CA  GLU A  18      10.712  -2.814  -6.694  1.00  7.08           C  
ATOM     67  C   GLU A  18      10.665  -1.471  -5.968  1.00  6.45           C  
ATOM     68  O   GLU A  18       9.682  -0.744  -6.085  1.00  5.28           O  
ATOM     69  N   PRO A  19      11.691  -1.032  -5.209  1.00  7.24           N  
ATOM     70  CA  PRO A  19      11.786   0.247  -4.454  1.00  7.07           C  
ATOM     71  C   PRO A  19      11.447   1.524  -5.180  1.00  6.65           C  
ATOM     72  O   PRO A  19      11.254   2.598  -4.570  1.00  6.37           O  
ATOM     73  N   SER A  20      11.497   1.445  -6.525  1.00  6.80           N  
ATOM     74  CA  SER A  20      11.192   2.525  -7.443  1.00  6.28           C  
ATOM     75  C   SER A  20       9.695   2.636  -7.815  1.00  8.45           C  
ATOM     76  O   SER A  20       9.341   3.662  -8.447  1.00  7.26           O  
ATOM     77  N   ASP A  21       8.852   1.661  -7.454  1.00  7.50           N  
ATOM     78  CA  ASP A  21       7.413   1.770  -7.509  1.00  7.70           C  
ATOM     79  C   ASP A  21       6.818   2.814  -6.620  1.00  7.08           C  
ATOM     80  O   ASP A  21       7.212   3.002  -5.470  1.00  8.11           O  
ATOM     81  N   THR A  22       5.797   3.583  -7.092  1.00  5.37           N  
ATOM     82  CA  THR A  22       5.049   4.370  -6.199  1.00  6.01           C  
ATOM     83  C   THR A  22       3.964   3.606  -5.422  1.00  8.01           C  
ATOM     84  O   THR A  22       3.547   2.481  -5.710  1.00  8.11           O  
ATOM     85  N   ILE A  23       3.468   4.253  -4.369  1.00  8.32           N  
ATOM     86  CA  ILE A  23       2.326   3.865  -3.557  1.00  9.92           C  
ATOM     87  C   ILE A  23       1.053   3.689  -4.438  1.00 10.01           C  
ATOM     88  O   ILE A  23       0.236   2.758  -4.273  1.00  8.71           O  
ATOM     89  N   GLU A  24       0.923   4.637  -5.428  1.00  9.54           N  
ATOM     90  CA  GLU A  24      -0.110   4.437  -6.429  1.00 11.81           C  
ATOM     91  C   GLU A  24       0.034   3.141  -7.245  1.00 11.14           C  
ATOM     92  O   GLU A  24      -0.887   2.390  -7.438  1.00 10.62           O  
ATOM     93  N   ASN A  25       1.290   2.845  -7.706  1.00  9.43           N  
ATOM     94  CA  ASN A  25       1.534   1.595  -8.387  1.00 10.96           C  
ATOM     95  C   ASN A  25       1.236   0.309  -7.484  1.00  9.68           C  
ATOM     96  O   ASN A  25       0.619  -0.644  -7.917  1.00  9.33           O  
ATOM     97  N   VAL A  26       1.658   0.306  -6.250  1.00  6.52           N  
ATOM     98  CA  VAL A  26       1.320  -0.775  -5.269  1.00  5.53           C  
ATOM     99  C   VAL A  26      -0.256  -0.931  -5.009  1.00  4.42           C  
ATOM    100  O   VAL A  26      -0.707  -2.062  -5.034  1.00  3.40           O  
ATOM    101  N   LYS A  27      -1.077   0.181  -4.824  1.00  2.64           N  
ATOM    102  CA  LYS A  27      -2.482  -0.005  -4.709  1.00  4.14           C  
ATOM    103  C   LYS A  27      -3.177  -0.498  -5.983  1.00  5.58           C  
ATOM    104  O   LYS A  27      -4.231  -1.117  -6.023  1.00  4.11           O  
ATOM    105  N   ALA A  28      -2.572  -0.250  -7.205  1.00  6.61           N  
ATOM    106  CA  ALA A  28      -3.035  -0.651  -8.524  1.00  7.74           C  
ATOM    107  C   ALA A  28      -2.664  -2.120  -8.667  1.00  9.17           C  
ATOM    108  O   ALA A  28      -3.410  -2.928  -9.297  1.00 11.45           O  
ATOM    109  N   LYS A  29      -1.511  -2.595  -8.099  1.00  8.96           N  
ATOM    110  CA  LYS A  29      -1.280  -4.023  -8.037  1.00  7.90           C  
ATOM    111  C   LYS A  29      -2.165  -4.828  -7.056  1.00  6.92           C  
ATOM    112  O   LYS A  29      -2.601  -5.959  -7.323  1.00  6.87           O  
ATOM    113  N   ILE A  30      -2.594  -4.230  -5.953  1.00  4.57           N  
ATOM    114  CA  ILE A  30      -3.571  -4.800  -5.010  1.00  5.58           C  
ATOM    115  C   ILE A  30      -4.938  -4.751  -5.650  1.00  7.26           C  
ATOM    116  O   ILE A  30      -5.760  -5.607  -5.390  1.00  9.46           O  
ATOM    117  N   GLN A  31      -5.265  -3.776  -6.553  1.00  7.06           N  
ATOM    118  CA  GLN A  31      -6.502  -3.862  -7.284  1.00  8.67           C  
ATOM    119  C   GLN A  31      -6.512  -5.149  -8.201  1.00 10.90           C  
ATOM    120  O   GLN A  31      -7.441  -5.984  -8.132  1.00  9.63           O  
ATOM    121  N   ASP A  32      -5.396  -5.435  -8.902  1.00 10.93           N  
ATOM    122  CA  ASP A  32      -5.099  -6.713  -9.593  1.00 14.01           C  
ATOM    123  C   ASP A  32      -5.264  -7.979  -8.710  1.00 14.04           C  
ATOM    124  O   ASP A  32      -5.834  -8.978  -9.123  1.00 13.39           O  
ATOM    125  N   LYS A  33      -4.883  -7.937  -7.353  1.00 14.22           N  
ATOM    126  CA  LYS A  33      -5.184  -9.079  -6.470  1.00 14.00           C  
ATOM    127  C   LYS A  33      -6.468  -9.201  -5.813  1.00 12.37           C  
ATOM    128  O   LYS A  33      -7.044 -10.286  -5.820  1.00 12.17           O  
ATOM    129  N   GLU A  34      -6.993  -8.114  -5.198  1.00 10.11           N  
ATOM    130  CA  GLU A  34      -8.215  -8.215  -4.409  1.00 10.07           C  
ATOM    131  C   GLU A  34      -9.411  -7.538  -5.111  1.00  9.32           C  
ATOM    132  O   GLU A  34     -10.544  -7.670  -4.604  1.00 11.61           O  
ATOM    133  N   GLY A  35      -9.255  -6.865  -6.282  1.00  7.22           N  
ATOM    134  CA  GLY A  35     -10.354  -6.255  -6.967  1.00  6.29           C  
ATOM    135  C   GLY A  35     -10.810  -4.884  -6.427  1.00  6.93           C  
ATOM    136  O   GLY A  35     -11.856  -4.411  -6.837  1.00  7.41           O  
ATOM    137  N   ILE A  36     -10.006  -4.176  -5.559  1.00  5.86           N  
ATOM    138  CA  ILE A  36     -10.454  -3.035  -4.876  1.00  6.07           C  
ATOM    139  C   ILE A  36      -9.848  -1.807  -5.529  1.00  6.36           C  
ATOM    140  O   ILE A  36      -8.648  -1.695  -5.605  1.00  6.18           O  
ATOM    141  N   PRO A  37     -10.626  -0.884  -6.079  1.00  8.65           N  
ATOM    142  CA  PRO A  37     -10.216   0.471  -6.509  1.00  9.18           C  
ATOM    143  C   PRO A  37      -9.032   1.162  -5.737  1.00  9.85           C  
ATOM    144  O   PRO A  37      -9.248   1.258  -4.534  1.00  8.51           O  
ATOM    145  N   PRO A  38      -7.975   1.724  -6.308  1.00  8.71           N  
ATOM    146  CA  PRO A  38      -6.933   2.377  -5.524  1.00  9.08           C  
ATOM    147  C   PRO A  38      -7.353   3.659  -4.750  1.00  9.28           C  
ATOM    148  O   PRO A  38      -6.730   4.074  -3.743  1.00  6.50           O  
ATOM    149  N   ASP A  39      -8.427   4.324  -5.246  1.00 11.20           N  
ATOM    150  CA  ASP A  39      -9.143   5.345  -4.600  1.00 14.96           C  
ATOM    151  C   ASP A  39      -9.757   4.909  -3.244  1.00 13.99           C  
ATOM    152  O   ASP A  39      -9.670   5.598  -2.248  1.00 13.75           O  
ATOM    153  N   GLN A  40     -10.322   3.691  -3.083  1.00 11.60           N  
ATOM    154  CA  GLN A  40     -10.828   3.176  -1.790  1.00 10.76           C  
ATOM    155  C   GLN A  40      -9.619   2.833  -0.890  1.00  8.01           C  
ATOM    156  O   GLN A  40      -9.650   2.905   0.308  1.00  8.96           O  
ATOM    157  N   GLN A  41      -8.479   2.352  -1.424  1.00  6.52           N  
ATOM    158  CA  GLN A  41      -7.377   1.850  -0.663  1.00  3.87           C  
ATOM    159  C   GLN A  41      -6.490   2.975  -0.063  1.00  4.79           C  
ATOM    160  O   GLN A  41      -6.069   3.877  -0.748  1.00  6.34           O  
ATOM    161  N   ARG A  42      -6.076   2.844   1.189  1.00  5.73           N  
ATOM    162  CA  ARG A  42      -5.152   3.829   1.754  1.00  6.97           C  
ATOM    163  C   ARG A  42      -4.160   3.112   2.662  1.00  7.15           C  
ATOM    164  O   ARG A  42      -4.591   2.196   3.431  1.00  7.33           O  
ATOM    165  N   LEU A  43      -2.839   3.374   2.517  1.00  4.65           N  
ATOM    166  CA  LEU A  43      -1.790   2.619   3.160  1.00  3.51           C  
ATOM    167  C   LEU A  43      -1.105   3.407   4.263  1.00  5.56           C  
ATOM    168  O   LEU A  43      -0.866   4.586   4.124  1.00  4.19           O  
ATOM    169  N   ILE A  44      -0.817   2.743   5.350  1.00  4.58           N  
ATOM    170  CA  ILE A  44      -0.138   3.353   6.443  1.00  5.55           C  
ATOM    171  C   ILE A  44       1.078   2.575   6.877  1.00  5.46           C  
ATOM    172  O   ILE A  44       1.032   1.351   7.084  1.00  6.04           O  
ATOM    173  N   PHE A  45       2.236   3.198   7.077  1.00  6.75           N  
ATOM    174  CA  PHE A  45       3.427   2.567   7.580  1.00  4.70           C  
ATOM    175  C   PHE A  45       4.315   3.601   8.263  1.00  6.34           C  
ATOM    176  O   PHE A  45       4.312   4.787   7.834  1.00  5.45           O  
ATOM    177  N   ALA A  46       5.052   3.185   9.311  1.00  6.53           N  
ATOM    178  CA  ALA A  46       6.003   3.940  10.056  1.00  7.15           C  
ATOM    179  C   ALA A  46       5.485   5.327  10.457  1.00  9.00           C  
ATOM    180  O   ALA A  46       6.114   6.393  10.341  1.00 11.15           O  
ATOM    181  N   GLY A  47       4.257   5.249  11.014  1.00  9.35           N  
ATOM    182  CA  GLY A  47       3.603   6.395  11.628  1.00 11.68           C  
ATOM    183  C   GLY A  47       3.049   7.394  10.672  1.00 11.14           C  
ATOM    184  O   GLY A  47       2.447   8.431  11.056  1.00 13.93           O  
ATOM    185  N   LYS A  48       3.073   7.067   9.371  1.00 10.47           N  
ATOM    186  CA  LYS A  48       2.542   7.964   8.356  1.00  8.82           C  
ATOM    187  C   LYS A  48       1.547   7.337   7.474  1.00  7.68           C  
ATOM    188  O   LYS A  48       1.714   6.230   7.076  1.00  6.47           O  
ATOM    189  N   GLN A  49       0.361   7.996   7.284  1.00  8.89           N  
ATOM    190  CA  GLN A  49      -0.519   7.633   6.153  1.00  7.18           C  
ATOM    191  C   GLN A  49       0.258   7.983   4.858  1.00  8.23           C  
ATOM    192  O   GLN A  49       0.758   9.059   4.633  1.00  9.70           O  
ATOM    193  N   LEU A  50       0.330   7.019   3.870  1.00  6.51           N  
ATOM    194  CA  LEU A  50       1.243   7.159   2.808  1.00  7.41           C  
ATOM    195  C   LEU A  50       0.679   7.857   1.620  1.00  8.27           C  
ATOM    196  O   LEU A  50      -0.447   7.622   1.116  1.00  8.34           O  
ATOM    197  N   GLU A  51       1.468   8.806   1.087  1.00  9.43           N  
ATOM    198  CA  GLU A  51       1.062   9.552  -0.099  1.00 11.90           C  
ATOM    199  C   GLU A  51       1.217   8.855  -1.513  1.00 11.49           C  
ATOM    200  O   GLU A  51       2.098   7.988  -1.642  1.00  9.88           O  
ATOM    201  N   ASP A  52       0.382   9.179  -2.557  1.00 12.71           N  
ATOM    202  CA  ASP A  52       0.290   8.565  -3.884  1.00 16.56           C  
ATOM    203  C   ASP A  52       1.442   8.646  -4.806  1.00 15.83           C  
ATOM    204  O   ASP A  52       1.779   7.648  -5.477  1.00 17.21           O  
ATOM    205  N   GLY A  53       2.040   9.836  -4.802  1.00 15.00           N  
ATOM    206  CA  GLY A  53       3.069  10.248  -5.775  1.00 11.77           C  
ATOM    207  C   GLY A  53       4.476  10.160  -5.229  1.00 11.10           C  
ATOM    208  O   GLY A  53       5.357  10.866  -5.647  1.00 11.25           O  
ATOM    209  N   ARG A  54       4.658   9.292  -4.248  1.00  8.53           N  
ATOM    210  CA  ARG A  54       5.953   8.981  -3.584  1.00  9.05           C  
ATOM    211  C   ARG A  54       6.362   7.556  -3.770  1.00  8.96           C  
ATOM    212  O   ARG A  54       5.538   6.670  -3.916  1.00 11.60           O  
ATOM    213  N   THR A  55       7.739   7.229  -3.827  1.00  9.05           N  
ATOM    214  CA  THR A  55       8.215   5.796  -3.966  1.00  9.03           C  
ATOM    215  C   THR A  55       8.469   5.037  -2.671  1.00  8.15           C  
ATOM    216  O   THR A  55       8.471   5.521  -1.548  1.00  5.91           O  
ATOM    217  N   LEU A  56       8.574   3.708  -2.708  1.00  6.91           N  
ATOM    218  CA  LEU A  56       8.949   2.862  -1.644  1.00  8.29           C  
ATOM    219  C   LEU A  56      10.264   3.168  -1.058  1.00  8.05           C  
ATOM    220  O   LEU A  56      10.381   3.267   0.160  1.00 10.17           O  
ATOM    221  N   SER A  57      11.281   3.442  -1.928  1.00  8.92           N  
ATOM    222  CA  SER A  57      12.616   3.985  -1.469  1.00  9.00           C  
ATOM    223  C   SER A  57      12.542   5.286  -0.629  1.00  9.44           C  
ATOM    224  O   SER A  57      13.130   5.411   0.433  1.00 10.91           O  
ATOM    225  N   ASP A  58      11.698   6.215  -1.016  1.00  9.11           N  
ATOM    226  CA  ASP A  58      11.397   7.497  -0.388  1.00  7.91           C  
ATOM    227  C   ASP A  58      10.812   7.375   0.994  1.00  9.12           C  
ATOM    228  O   ASP A  58      11.166   8.071   1.952  1.00  8.61           O  
ATOM    229  N   TYR A  59       9.924   6.390   1.184  1.00  7.97           N  
ATOM    230  CA  TYR A  59       9.326   6.112   2.497  1.00  8.45           C  
ATOM    231  C   TYR A  59      10.070   5.139   3.360  1.00 10.98           C  
ATOM    232  O   TYR A  59       9.614   4.822   4.454  1.00 12.95           O  
ATOM    233  N   ASN A  60      11.273   4.687   2.820  1.00 12.38           N  
ATOM    234  CA  ASN A  60      12.187   3.728   3.466  1.00 13.94           C  
ATOM    235  C   ASN A  60      11.659   2.327   3.756  1.00 14.16           C  
ATOM    236  O   ASN A  60      11.905   1.740   4.843  1.00 14.26           O  
ATOM    237  N   ILE A  61      10.923   1.792   2.736  1.00 11.08           N  
ATOM    238  CA  ILE A  61      10.362   0.435   2.843  1.00 11.78           C  
ATOM    239  C   ILE A  61      11.319  -0.572   2.195  1.00 13.74           C  
ATOM    240  O   ILE A  61      11.624  -0.439   1.034  1.00 14.60           O  
ATOM    241  N   GLN A  62      11.849  -1.474   3.054  1.00 13.97           N  
ATOM    242  CA  GLN A  62      12.672  -2.552   2.498  1.00 15.52           C  
ATOM    243  C   GLN A  62      11.949  -3.816   2.361  1.00 13.94           C  
ATOM    244  O   GLN A  62      10.743  -3.880   2.646  1.00 12.15           O  
ATOM    245  N   LYS A  63      12.678  -4.889   1.960  1.00 11.73           N  
ATOM    246  CA  LYS A  63      12.125  -6.243   1.832  1.00 11.97           C  
ATOM    247  C   LYS A  63      11.444  -6.800   3.068  1.00 10.41           C  
ATOM    248  O   LYS A  63      11.888  -6.634   4.208  1.00  9.59           O  
ATOM    249  N   GLU A  64      10.271  -7.511   2.886  1.00 10.04           N  
ATOM    250  CA  GLU A  64       9.411  -8.162   3.918  1.00 10.94           C  
ATOM    251  C   GLU A  64       8.855  -7.273   5.072  1.00  9.74           C  
ATOM    252  O   GLU A  64       8.359  -7.685   6.109  1.00  9.42           O  
ATOM    253  N   SER A  65       8.850  -5.928   4.785  1.00  6.85           N  
ATOM    254  CA  SER A  65       8.093  -4.972   5.602  1.00  6.90           C  
ATOM    255  C   SER A  65       6.605  -5.173   5.594  1.00  4.72           C  
ATOM    256  O   SER A  65       6.022  -5.462   4.552  1.00  3.91           O  
ATOM    257  N   THR A  66       5.961  -4.859   6.766  1.00  4.48           N  
ATOM    258  CA  THR A  66       4.549  -4.913   6.850  1.00  3.80           C  
ATOM    259  C   THR A  66       3.863  -3.551   6.712  1.00  4.60           C  
ATOM    260  O   THR A  66       4.026  -2.693   7.546  1.00  5.33           O  
ATOM    261  N   LEU A  67       3.164  -3.321   5.588  1.00  4.17           N  
ATOM    262  CA  LEU A  67       2.322  -2.155   5.393  1.00  3.85           C  
ATOM    263  C   LEU A  67       0.903  -2.424   5.825  1.00  3.80           C  
ATOM    264  O   LEU A  67       0.328  -3.492   5.603  1.00  5.54           O  
ATOM    265  N   HIS A  68       0.359  -1.401   6.483  1.00  2.94           N  
ATOM    266  CA  HIS A  68      -1.033  -1.512   6.954  1.00  4.17           C  
ATOM    267  C   HIS A  68      -2.001  -0.914   5.884  1.00  5.32           C  
ATOM    268  O   HIS A  68      -1.698   0.119   5.240  1.00  7.70           O  
ATOM    269  N   LEU A  69      -3.163  -1.536   5.656  1.00  5.29           N  
ATOM    270  CA  LEU A  69      -4.111  -1.040   4.647  1.00  3.97           C  
ATOM    271  C   LEU A  69      -5.366  -0.747   5.333  1.00  5.07           C  
ATOM    272  O   LEU A  69      -5.849  -1.477   6.151  1.00  4.34           O  
ATOM    273  N   VAL A  70      -5.881   0.465   5.127  1.00  4.29           N  
ATOM    274  CA  VAL A  70      -7.226   0.836   5.529  1.00  6.26           C  
ATOM    275  C   VAL A  70      -8.087   1.164   4.241  1.00  9.22           C  
ATOM    276  O   VAL A  70      -7.572   1.654   3.243  1.00  9.36           O  
TER
ENDMDL
MODEL      14
ATOM      1  N   GLN A   2      10.192  -8.285  -1.490  1.00  9.27           N  
ATOM      2  CA  GLN A   2       8.823  -8.525  -1.040  1.00  9.07           C  
ATOM      3  C   GLN A   2       8.332  -7.563   0.011  1.00  8.72           C  
ATOM      4  O   GLN A   2       9.127  -7.173   0.875  1.00  8.22           O  
ATOM      5  N   ILE A   3       7.022  -7.189  -0.019  1.00  5.87           N  
ATOM      6  CA  ILE A   3       6.356  -6.402   1.045  1.00  5.07           C  
ATOM      7  C   ILE A   3       5.022  -7.084   1.465  1.00  4.01           C  
ATOM      8  O   ILE A   3       4.477  -7.871   0.679  1.00  4.61           O  
ATOM      9  N   PHE A   4       4.581  -7.029   2.715  1.00  4.55           N  
ATOM     10  CA  PHE A   4       3.485  -7.748   3.318  1.00  4.68           C  
ATOM     11  C   PHE A   4       2.360  -6.817   3.625  1.00  5.30           C  
ATOM     12  O   PHE A   4       2.595  -5.891   4.388  1.00  5.58           O  
ATOM     13  N   VAL A   5       1.151  -7.015   2.986  1.00  4.44           N  
ATOM     14  CA  VAL A   5       0.151  -6.012   3.073  1.00  3.87           C  
ATOM     15  C   VAL A   5      -0.966  -6.603   3.893  1.00  4.93           C  
ATOM     16  O   VAL A   5      -1.600  -7.578   3.497  1.00  6.84           O  
ATOM     17  N   LYS A   6      -1.254  -6.002   5.083  1.00  6.04           N  
ATOM     18  CA  LYS A   6      -2.133  -6.659   6.042  1.00  6.12           C  
ATOM     19  C   LYS A   6      -3.411  -5.906   6.007  1.00  6.57           C  
ATOM     20  O   LYS A   6      -3.433  -4.693   6.095  1.00  5.76           O  
ATOM     21  N   THR A   7      -4.490  -6.649   5.801  1.00  7.41           N  
ATOM     22  CA  THR A   7      -5.760  -6.097   5.510  1.00  7.48           C  
ATOM     23  C   THR A   7      -6.535  -5.842   6.815  1.00  8.75           C  
ATOM     24  O   THR A   7      -6.208  -6.281   7.909  1.00  8.58           O  
ATOM     25  N   LEU A   8      -7.727  -5.222   6.734  1.00  9.84           N  
ATOM     26  CA  LEU A   8      -8.711  -5.127   7.808  1.00 14.15           C  
ATOM     27  C   LEU A   8      -9.435  -6.441   8.004  1.00 17.37           C  
ATOM     28  O   LEU A   8      -9.908  -6.765   9.117  1.00 17.01           O  
ATOM     29  N   THR A   9      -9.426  -7.321   6.938  1.00 18.33           N  
ATOM     30  CA  THR A   9     -10.030  -8.665   6.917  1.00 19.24           C  
ATOM     31  C   THR A   9      -9.155  -9.766   7.481  1.00 19.48           C  
ATOM     32  O   THR A   9      -9.472 -10.921   7.600  1.00 23.14           O  
ATOM     33  N   GLY A  10      -7.920  -9.331   7.866  1.00 19.43           N  
ATOM     34  CA  GLY A  10      -6.911 -10.119   8.532  1.00 18.74           C  
ATOM     35  C   GLY A  10      -6.047 -11.029   7.653  1.00 17.62           C  
ATOM     36  O   GLY A  10      -5.226 -11.821   8.142  1.00 19.74           O  
ATOM     37  N   LYS A  11      -6.123 -10.841   6.315  1.00 13.56           N  
ATOM     38  CA  LYS A  11      -5.351 -11.499   5.315  1.00 11.91           C  
ATOM     39  C   LYS A  11      -4.048 -10.787   5.083  1.00 10.18           C  
ATOM     40  O   LYS A  11      -3.983  -9.542   5.129  1.00  9.10           O  
ATOM     41  N   THR A  12      -2.893 -11.500   4.815  1.00  9.63           N  
ATOM     42  CA  THR A  12      -1.619 -10.897   4.567  1.00  9.85           C  
ATOM     43  C   THR A  12      -1.284 -11.170   3.116  1.00 11.66           C  
ATOM     44  O   THR A  12      -0.903 -12.290   2.710  1.00 12.33           O  
ATOM     45  N   ILE A  13      -1.354 -10.073   2.239  1.00 10.42           N  
ATOM     46  CA  ILE A  13      -0.951 -10.078   0.824  1.00 11.84           C  
ATOM     47  C   ILE A  13       0.501  -9.876   0.622  1.00 10.55           C  
ATOM     48  O   ILE A  13       1.040  -8.913   1.156  1.00 11.92           O  
ATOM     49  N   THR A  14       1.235 -10.695  -0.179  1.00  9.39           N  
ATOM     50  CA  THR A  14       2.654 -10.560  -0.524  1.00  9.63           C  
ATOM     51  C   THR A  14       2.827 -10.103  -1.951  1.00 11.20           C  
ATOM     52  O   THR A  14       2.276 -10.655  -2.858  1.00 11.63           O  
ATOM     53  N   LEU A  15       3.590  -8.976  -2.118  1.00  8.29           N  
ATOM     54  CA  LEU A  15       3.750  -8.303  -3.383  1.00  9.03           C  
ATOM     55  C   LEU A  15       5.212  -8.073  -3.746  1.00  8.59           C  
ATOM     56  O   LEU A  15       5.994  -7.543  -2.945  1.00  7.79           O  
ATOM     57  N   GLU A  16       5.569  -8.569  -4.935  1.00 11.04           N  
ATOM     58  CA  GLU A  16       6.818  -8.191  -5.635  1.00 11.50           C  
ATOM     59  C   GLU A  16       6.887  -6.769  -6.050  1.00 10.13           C  
ATOM     60  O   GLU A  16       6.167  -6.404  -6.971  1.00  9.83           O  
ATOM     61  N   VAL A  17       7.729  -5.933  -5.383  1.00  8.99           N  
ATOM     62  CA  VAL A  17       7.932  -4.532  -5.649  1.00  8.85           C  
ATOM     63  C   VAL A  17       9.453  -4.192  -5.748  1.00  8.04           C  
ATOM     64  O   VAL A  17      10.420  -4.794  -5.219  1.00  8.99           O  
ATOM     65  N   GLU A  18       9.661  -3.090  -6.550  1.00  7.29           N  
ATOM     66  CA  GLU A  18      10.930  -2.434  -6.639  1.00  7.08           C  
ATOM     67  C   GLU A  18      10.875  -1.411  -5.518  1.00  6.45           C  
ATOM     68  O   GLU A  18       9.819  -0.764  -5.362  1.00  5.28           O  
ATOM     69  N   PRO A  19      11.917  -1.083  -4.767  1.00  7.24           N  
ATOM     70  CA  PRO A  19      11.916   0.088  -3.841  1.00  7.07           C  
ATOM     71  C   PRO A  19      11.875   1.385  -4.562  1.00  6.65           C  
ATOM     72  O   PRO A  19      11.866   2.450  -3.930  1.00  6.37           O  
ATOM     73  N   SER A  20      11.941   1.363  -5.923  1.00  6.80           N  
ATOM     74  CA  SER A  20      12.050   2.510  -6.686  1.00  6.28           C  
ATOM     75  C   SER A  20      10.807   2.718  -7.542  1.00  8.45           C  
ATOM     76  O   SER A  20      10.721   3.490  -8.456  1.00  7.26           O  
ATOM     77  N   ASP A  21       9.761   1.904  -7.140  1.00  7.50           N  
ATOM     78  CA  ASP A  21       8.422   1.958  -7.707  1.00  7.70           C  
ATOM     79  C   ASP A  21       7.634   2.839  -6.832  1.00  7.08           C  
ATOM     80  O   ASP A  21       8.015   3.205  -5.767  1.00  8.11           O  
ATOM     81  N   THR A  22       6.506   3.301  -7.322  1.00  5.37           N  
ATOM     82  CA  THR A  22       5.624   4.238  -6.612  1.00  6.01           C  
ATOM     83  C   THR A  22       4.605   3.495  -5.735  1.00  8.01           C  
ATOM     84  O   THR A  22       4.384   2.278  -5.857  1.00  8.11           O  
ATOM     85  N   ILE A  23       3.838   4.244  -4.969  1.00  8.32           N  
ATOM     86  CA  ILE A  23       2.766   3.831  -4.155  1.00  9.92           C  
ATOM     87  C   ILE A  23       1.573   3.560  -5.005  1.00 10.01           C  
ATOM     88  O   ILE A  23       0.854   2.597  -4.766  1.00  8.71           O  
ATOM     89  N   GLU A  24       1.342   4.299  -6.099  1.00  9.54           N  
ATOM     90  CA  GLU A  24       0.243   4.061  -7.047  1.00 11.81           C  
ATOM     91  C   GLU A  24       0.326   2.796  -7.759  1.00 11.14           C  
ATOM     92  O   GLU A  24      -0.689   2.162  -8.025  1.00 10.62           O  
ATOM     93  N   ASN A  25       1.565   2.333  -8.046  1.00  9.43           N  
ATOM     94  CA  ASN A  25       1.796   1.011  -8.583  1.00 10.96           C  
ATOM     95  C   ASN A  25       1.513  -0.092  -7.571  1.00  9.68           C  
ATOM     96  O   ASN A  25       1.017  -1.176  -7.866  1.00  9.33           O  
ATOM     97  N   VAL A  26       1.861   0.115  -6.291  1.00  6.52           N  
ATOM     98  CA  VAL A  26       1.468  -0.802  -5.215  1.00  5.53           C  
ATOM     99  C   VAL A  26       0.026  -1.025  -5.032  1.00  4.42           C  
ATOM    100  O   VAL A  26      -0.468  -2.160  -4.815  1.00  3.40           O  
ATOM    101  N   LYS A  27      -0.712   0.122  -5.123  1.00  2.64           N  
ATOM    102  CA  LYS A  27      -2.167   0.183  -5.125  1.00  4.14           C  
ATOM    103  C   LYS A  27      -2.783  -0.515  -6.290  1.00  5.58           C  
ATOM    104  O   LYS A  27      -3.756  -1.178  -6.160  1.00  4.11           O  
ATOM    105  N   ALA A  28      -2.163  -0.491  -7.491  1.00  6.61           N  
ATOM    106  CA  ALA A  28      -2.538  -1.243  -8.688  1.00  7.74           C  
ATOM    107  C   ALA A  28      -2.527  -2.763  -8.476  1.00  9.17           C  
ATOM    108  O   ALA A  28      -3.443  -3.487  -8.937  1.00 11.45           O  
ATOM    109  N   LYS A  29      -1.538  -3.203  -7.698  1.00  8.96           N  
ATOM    110  CA  LYS A  29      -1.490  -4.561  -7.276  1.00  7.90           C  
ATOM    111  C   LYS A  29      -2.521  -4.908  -6.265  1.00  6.92           C  
ATOM    112  O   LYS A  29      -3.022  -6.018  -6.401  1.00  6.87           O  
ATOM    113  N   ILE A  30      -2.868  -4.086  -5.293  1.00  4.57           N  
ATOM    114  CA  ILE A  30      -3.883  -4.375  -4.389  1.00  5.58           C  
ATOM    115  C   ILE A  30      -5.273  -4.404  -5.021  1.00  7.26           C  
ATOM    116  O   ILE A  30      -6.164  -5.119  -4.590  1.00  9.46           O  
ATOM    117  N   GLN A  31      -5.436  -3.607  -6.085  1.00  7.06           N  
ATOM    118  CA  GLN A  31      -6.715  -3.473  -6.825  1.00  8.67           C  
ATOM    119  C   GLN A  31      -7.081  -4.788  -7.497  1.00 10.90           C  
ATOM    120  O   GLN A  31      -8.255  -5.225  -7.430  1.00  9.63           O  
ATOM    121  N   ASP A  32      -6.066  -5.434  -8.171  1.00 10.93           N  
ATOM    122  CA  ASP A  32      -6.223  -6.754  -8.789  1.00 14.01           C  
ATOM    123  C   ASP A  32      -6.482  -7.854  -7.732  1.00 14.04           C  
ATOM    124  O   ASP A  32      -7.326  -8.769  -7.940  1.00 13.39           O  
ATOM    125  N   LYS A  33      -5.871  -7.861  -6.561  1.00 14.22           N  
ATOM    126  CA  LYS A  33      -6.056  -8.778  -5.457  1.00 14.00           C  
ATOM    127  C   LYS A  33      -7.352  -8.589  -4.735  1.00 12.37           C  
ATOM    128  O   LYS A  33      -8.049  -9.543  -4.505  1.00 12.17           O  
ATOM    129  N   GLU A  34      -7.702  -7.344  -4.249  1.00 10.11           N  
ATOM    130  CA  GLU A  34      -8.770  -7.170  -3.269  1.00 10.07           C  
ATOM    131  C   GLU A  34     -10.010  -6.508  -3.790  1.00  9.32           C  
ATOM    132  O   GLU A  34     -11.023  -6.321  -3.051  1.00 11.61           O  
ATOM    133  N   GLY A  35      -9.944  -6.085  -5.101  1.00  7.22           N  
ATOM    134  CA  GLY A  35     -10.991  -5.327  -5.820  1.00  6.29           C  
ATOM    135  C   GLY A  35     -11.176  -3.930  -5.290  1.00  6.93           C  
ATOM    136  O   GLY A  35     -12.270  -3.413  -5.432  1.00  7.41           O  
ATOM    137  N   ILE A  36     -10.122  -3.244  -4.695  1.00  5.86           N  
ATOM    138  CA  ILE A  36     -10.216  -1.954  -4.065  1.00  6.07           C  
ATOM    139  C   ILE A  36      -9.493  -0.897  -4.882  1.00  6.36           C  
ATOM    140  O   ILE A  36      -8.290  -1.014  -5.081  1.00  6.18           O  
ATOM    141  N   PRO A  37     -10.115   0.104  -5.537  1.00  8.65           N  
ATOM    142  CA  PRO A  37      -9.440   1.076  -6.366  1.00  9.18           C  
ATOM    143  C   PRO A  37      -8.282   1.873  -5.677  1.00  9.85           C  
ATOM    144  O   PRO A  37      -8.413   2.017  -4.460  1.00  8.51           O  
ATOM    145  N   PRO A  38      -7.190   2.312  -6.279  1.00  8.71           N  
ATOM    146  CA  PRO A  38      -6.197   3.262  -5.768  1.00  9.08           C  
ATOM    147  C   PRO A  38      -6.699   4.376  -4.788  1.00  9.28           C  
ATOM    148  O   PRO A  38      -6.034   4.657  -3.751  1.00  6.50           O  
ATOM    149  N   ASP A  39      -7.793   5.012  -5.173  1.00 11.20           N  
ATOM    150  CA  ASP A  39      -8.377   6.055  -4.382  1.00 14.96           C  
ATOM    151  C   ASP A  39      -9.377   5.616  -3.278  1.00 13.99           C  
ATOM    152  O   ASP A  39      -9.948   6.478  -2.600  1.00 13.75           O  
ATOM    153  N   GLN A  40      -9.660   4.285  -3.115  1.00 11.60           N  
ATOM    154  CA  GLN A  40     -10.401   3.762  -1.996  1.00 10.76           C  
ATOM    155  C   GLN A  40      -9.446   3.043  -1.076  1.00  8.01           C  
ATOM    156  O   GLN A  40      -9.945   2.319  -0.176  1.00  8.96           O  
ATOM    157  N   GLN A  41      -8.146   3.274  -1.199  1.00  6.52           N  
ATOM    158  CA  GLN A  41      -7.244   2.647  -0.275  1.00  3.87           C  
ATOM    159  C   GLN A  41      -6.271   3.600   0.319  1.00  4.79           C  
ATOM    160  O   GLN A  41      -5.461   4.237  -0.343  1.00  6.34           O  
ATOM    161  N   ARG A  42      -6.357   3.700   1.674  1.00  5.73           N  
ATOM    162  CA  ARG A  42      -5.287   4.259   2.445  1.00  6.97           C  
ATOM    163  C   ARG A  42      -4.244   3.164   2.819  1.00  7.15           C  
ATOM    164  O   ARG A  42      -4.579   2.062   3.165  1.00  7.33           O  
ATOM    165  N   LEU A  43      -3.020   3.567   2.784  1.00  4.65           N  
ATOM    166  CA  LEU A  43      -1.923   2.677   3.155  1.00  3.51           C  
ATOM    167  C   LEU A  43      -1.191   3.285   4.358  1.00  5.56           C  
ATOM    168  O   LEU A  43      -0.697   4.427   4.335  1.00  4.19           O  
ATOM    169  N   ILE A  44      -1.107   2.565   5.539  1.00  4.58           N  
ATOM    170  CA  ILE A  44      -0.500   3.081   6.780  1.00  5.55           C  
ATOM    171  C   ILE A  44       0.752   2.330   7.058  1.00  5.46           C  
ATOM    172  O   ILE A  44       0.805   1.132   7.287  1.00  6.04           O  
ATOM    173  N   PHE A  45       1.940   3.038   7.032  1.00  6.75           N  
ATOM    174  CA  PHE A  45       3.290   2.499   7.362  1.00  4.70           C  
ATOM    175  C   PHE A  45       3.810   3.156   8.631  1.00  6.34           C  
ATOM    176  O   PHE A  45       4.219   4.317   8.580  1.00  5.45           O  
ATOM    177  N   ALA A  46       3.845   2.430   9.741  1.00  6.53           N  
ATOM    178  CA  ALA A  46       4.324   2.961  11.009  1.00  7.15           C  
ATOM    179  C   ALA A  46       3.672   4.271  11.394  1.00  9.00           C  
ATOM    180  O   ALA A  46       4.329   5.320  11.676  1.00 11.15           O  
ATOM    181  N   GLY A  47       2.318   4.333  11.413  1.00  9.35           N  
ATOM    182  CA  GLY A  47       1.612   5.604  11.766  1.00 11.68           C  
ATOM    183  C   GLY A  47       1.344   6.569  10.598  1.00 11.14           C  
ATOM    184  O   GLY A  47       0.495   7.509  10.765  1.00 13.93           O  
ATOM    185  N   LYS A  48       1.941   6.380   9.455  1.00 10.47           N  
ATOM    186  CA  LYS A  48       1.941   7.376   8.386  1.00  8.82           C  
ATOM    187  C   LYS A  48       1.252   6.985   7.124  1.00  7.68           C  
ATOM    188  O   LYS A  48       1.404   5.799   6.681  1.00  6.47           O  
ATOM    189  N   GLN A  49       0.484   7.900   6.550  1.00  8.89           N  
ATOM    190  CA  GLN A  49      -0.386   7.655   5.390  1.00  7.18           C  
ATOM    191  C   GLN A  49       0.458   7.938   4.151  1.00  8.23           C  
ATOM    192  O   GLN A  49       1.104   8.961   3.965  1.00  9.70           O  
ATOM    193  N   LEU A  50       0.602   6.968   3.227  1.00  6.51           N  
ATOM    194  CA  LEU A  50       1.495   7.065   2.100  1.00  7.41           C  
ATOM    195  C   LEU A  50       0.843   7.954   1.010  1.00  8.27           C  
ATOM    196  O   LEU A  50      -0.355   8.011   0.887  1.00  8.34           O  
ATOM    197  N   GLU A  51       1.629   8.572   0.100  1.00  9.43           N  
ATOM    198  CA  GLU A  51       1.081   9.351  -1.084  1.00 11.90           C  
ATOM    199  C   GLU A  51       1.439   8.715  -2.406  1.00 11.49           C  
ATOM    200  O   GLU A  51       2.513   8.102  -2.509  1.00  9.88           O  
ATOM    201  N   ASP A  52       0.455   8.771  -3.339  1.00 12.71           N  
ATOM    202  CA  ASP A  52       0.421   7.846  -4.478  1.00 16.56           C  
ATOM    203  C   ASP A  52       1.622   7.882  -5.472  1.00 15.83           C  
ATOM    204  O   ASP A  52       2.195   6.878  -5.816  1.00 17.21           O  
ATOM    205  N   GLY A  53       2.022   9.130  -5.874  1.00 15.00           N  
ATOM    206  CA  GLY A  53       3.058   9.337  -6.847  1.00 11.77           C  
ATOM    207  C   GLY A  53       4.503   9.353  -6.292  1.00 11.10           C  
ATOM    208  O   GLY A  53       5.457   9.335  -7.033  1.00 11.25           O  
ATOM    209  N   ARG A  54       4.604   9.381  -4.982  1.00  8.53           N  
ATOM    210  CA  ARG A  54       5.883   9.042  -4.295  1.00  9.05           C  
ATOM    211  C   ARG A  54       6.285   7.621  -4.288  1.00  8.96           C  
ATOM    212  O   ARG A  54       5.565   6.719  -4.780  1.00 11.60           O  
ATOM    213  N   THR A  55       7.574   7.328  -3.873  1.00  9.05           N  
ATOM    214  CA  THR A  55       8.238   6.010  -3.969  1.00  9.03           C  
ATOM    215  C   THR A  55       8.367   5.351  -2.676  1.00  8.15           C  
ATOM    216  O   THR A  55       8.141   5.932  -1.608  1.00  5.91           O  
ATOM    217  N   LEU A  56       8.596   4.006  -2.691  1.00  6.91           N  
ATOM    218  CA  LEU A  56       8.742   3.289  -1.405  1.00  8.29           C  
ATOM    219  C   LEU A  56      10.019   3.751  -0.573  1.00  8.05           C  
ATOM    220  O   LEU A  56       9.935   3.883   0.624  1.00 10.17           O  
ATOM    221  N   SER A  57      11.028   4.054  -1.330  1.00  8.92           N  
ATOM    222  CA  SER A  57      12.266   4.638  -0.761  1.00  9.00           C  
ATOM    223  C   SER A  57      12.055   6.002  -0.100  1.00  9.44           C  
ATOM    224  O   SER A  57      12.722   6.338   0.894  1.00 10.91           O  
ATOM    225  N   ASP A  58      11.109   6.869  -0.619  1.00  9.11           N  
ATOM    226  CA  ASP A  58      10.788   8.195  -0.087  1.00  7.91           C  
ATOM    227  C   ASP A  58      10.179   8.075   1.349  1.00  9.12           C  
ATOM    228  O   ASP A  58      10.305   9.018   2.146  1.00  8.61           O  
ATOM    229  N   TYR A  59       9.708   6.921   1.752  1.00  7.97           N  
ATOM    230  CA  TYR A  59       9.262   6.594   3.110  1.00  8.45           C  
ATOM    231  C   TYR A  59      10.025   5.519   3.744  1.00 10.98           C  
ATOM    232  O   TYR A  59       9.700   5.098   4.838  1.00 12.95           O  
ATOM    233  N   ASN A  60      11.188   5.173   3.149  1.00 12.38           N  
ATOM    234  CA  ASN A  60      12.089   4.140   3.593  1.00 13.94           C  
ATOM    235  C   ASN A  60      11.478   2.831   3.921  1.00 14.16           C  
ATOM    236  O   ASN A  60      11.702   2.213   4.963  1.00 14.26           O  
ATOM    237  N   ILE A  61      10.761   2.301   2.924  1.00 11.08           N  
ATOM    238  CA  ILE A  61      10.116   1.061   2.985  1.00 11.78           C  
ATOM    239  C   ILE A  61      11.027   0.008   2.416  1.00 13.74           C  
ATOM    240  O   ILE A  61      11.529   0.233   1.296  1.00 14.60           O  
ATOM    241  N   GLN A  62      11.272  -1.114   3.144  1.00 13.97           N  
ATOM    242  CA  GLN A  62      12.454  -1.999   2.883  1.00 15.52           C  
ATOM    243  C   GLN A  62      11.878  -3.341   2.630  1.00 13.94           C  
ATOM    244  O   GLN A  62      10.675  -3.483   2.750  1.00 12.15           O  
ATOM    245  N   LYS A  63      12.720  -4.398   2.454  1.00 11.73           N  
ATOM    246  CA  LYS A  63      12.335  -5.766   2.214  1.00 11.97           C  
ATOM    247  C   LYS A  63      11.646  -6.351   3.430  1.00 10.41           C  
ATOM    248  O   LYS A  63      12.033  -6.122   4.547  1.00  9.59           O  
ATOM    249  N   GLU A  64      10.563  -7.153   3.178  1.00 10.04           N  
ATOM    250  CA  GLU A  64       9.678  -7.861   4.090  1.00 10.94           C  
ATOM    251  C   GLU A  64       8.798  -6.987   4.989  1.00  9.74           C  
ATOM    252  O   GLU A  64       8.312  -7.391   6.049  1.00  9.42           O  
ATOM    253  N   SER A  65       8.668  -5.684   4.633  1.00  6.85           N  
ATOM    254  CA  SER A  65       7.801  -4.706   5.350  1.00  6.90           C  
ATOM    255  C   SER A  65       6.304  -5.001   5.522  1.00  4.72           C  
ATOM    256  O   SER A  65       5.524  -5.262   4.625  1.00  3.91           O  
ATOM    257  N   THR A  66       5.771  -4.824   6.736  1.00  4.48           N  
ATOM    258  CA  THR A  66       4.323  -4.958   6.971  1.00  3.80           C  
ATOM    259  C   THR A  66       3.731  -3.584   6.778  1.00  4.60           C  
ATOM    260  O   THR A  66       4.081  -2.620   7.445  1.00  5.33           O  
ATOM    261  N   LEU A  67       2.752  -3.530   5.904  1.00  4.17           N  
ATOM    262  CA  LEU A  67       2.004  -2.259   5.578  1.00  3.85           C  
ATOM    263  C   LEU A  67       0.577  -2.517   5.827  1.00  3.80           C  
ATOM    264  O   LEU A  67       0.080  -3.588   5.522  1.00  5.54           O  
ATOM    265  N   HIS A  68      -0.162  -1.583   6.367  1.00  2.94           N  
ATOM    266  CA  HIS A  68      -1.570  -1.770   6.650  1.00  4.17           C  
ATOM    267  C   HIS A  68      -2.400  -1.209   5.463  1.00  5.32           C  
ATOM    268  O   HIS A  68      -2.163  -0.121   4.964  1.00  7.70           O  
ATOM    269  N   LEU A  69      -3.386  -2.025   5.007  1.00  5.29           N  
ATOM    270  CA  LEU A  69      -4.280  -1.669   3.904  1.00  3.97           C  
ATOM    271  C   LEU A  69      -5.623  -1.304   4.542  1.00  5.07           C  
ATOM    272  O   LEU A  69      -6.269  -2.173   5.182  1.00  4.34           O  
ATOM    273  N   VAL A  70      -5.958   0.001   4.458  1.00  4.29           N  
ATOM    274  CA  VAL A  70      -7.101   0.581   5.163  1.00  6.26           C  
ATOM    275  C   VAL A  70      -8.063   1.168   4.194  1.00  9.22           C  
ATOM    276  O   VAL A  70      -7.626   1.998   3.338  1.00  9.36           O  
TER
ENDMDL
MODEL      15
ATOM      1  N   GLN A   2       9.717  -8.609  -2.203  1.00  9.27           N  
ATOM      2  CA  GLN A   2       8.485  -8.993  -1.524  1.00  9.07           C  
ATOM      3  C   GLN A   2       8.183  -8.018  -0.436  1.00  8.72           C  
ATOM      4  O   GLN A   2       9.044  -7.629   0.365  1.00  8.22           O  
ATOM      5  N   ILE A   3       6.945  -7.588  -0.285  1.00  5.87           N  
ATOM      6  CA  ILE A   3       6.466  -6.804   0.814  1.00  5.07           C  
ATOM      7  C   ILE A   3       5.081  -7.265   1.163  1.00  4.01           C  
ATOM      8  O   ILE A   3       4.316  -7.869   0.438  1.00  4.61           O  
ATOM      9  N   PHE A   4       4.705  -7.099   2.421  1.00  4.55           N  
ATOM     10  CA  PHE A   4       3.347  -7.511   2.951  1.00  4.68           C  
ATOM     11  C   PHE A   4       2.379  -6.339   3.368  1.00  5.30           C  
ATOM     12  O   PHE A   4       2.797  -5.240   3.657  1.00  5.58           O  
ATOM     13  N   VAL A   5       1.087  -6.514   3.312  1.00  4.44           N  
ATOM     14  CA  VAL A   5       0.063  -5.482   3.689  1.00  3.87           C  
ATOM     15  C   VAL A   5      -1.042  -6.090   4.438  1.00  4.93           C  
ATOM     16  O   VAL A   5      -1.780  -7.010   4.053  1.00  6.84           O  
ATOM     17  N   LYS A   6      -1.335  -5.594   5.619  1.00  6.04           N  
ATOM     18  CA  LYS A   6      -2.431  -6.083   6.499  1.00  6.12           C  
ATOM     19  C   LYS A   6      -3.762  -5.367   6.275  1.00  6.57           C  
ATOM     20  O   LYS A   6      -3.877  -4.148   6.054  1.00  5.76           O  
ATOM     21  N   THR A   7      -4.829  -6.131   6.166  1.00  7.41           N  
ATOM     22  CA  THR A   7      -6.220  -5.794   5.911  1.00  7.48           C  
ATOM     23  C   THR A   7      -7.000  -6.118   7.072  1.00  8.75           C  
ATOM     24  O   THR A   7      -6.795  -7.138   7.784  1.00  8.58           O  
ATOM     25  N   LEU A   8      -8.087  -5.337   7.338  1.00  9.84           N  
ATOM     26  CA  LEU A   8      -8.913  -5.366   8.516  1.00 14.15           C  
ATOM     27  C   LEU A   8      -9.598  -6.718   8.725  1.00 17.37           C  
ATOM     28  O   LEU A   8      -9.776  -7.218   9.845  1.00 17.01           O  
ATOM     29  N   THR A   9      -9.987  -7.323   7.600  1.00 18.33           N  
ATOM     30  CA  THR A   9     -10.999  -8.437   7.516  1.00 19.24           C  
ATOM     31  C   THR A   9     -10.310  -9.756   7.538  1.00 19.48           C  
ATOM     32  O   THR A   9     -10.752 -10.737   6.926  1.00 23.14           O  
ATOM     33  N   GLY A  10      -9.192  -9.827   8.375  1.00 19.43           N  
ATOM     34  CA  GLY A  10      -8.350 -10.986   8.486  1.00 18.74           C  
ATOM     35  C   GLY A  10      -7.588 -11.329   7.260  1.00 17.62           C  
ATOM     36  O   GLY A  10      -7.679 -12.524   6.778  1.00 19.74           O  
ATOM     37  N   LYS A  11      -6.665 -10.432   6.807  1.00 13.56           N  
ATOM     38  CA  LYS A  11      -5.721 -10.928   5.800  1.00 11.91           C  
ATOM     39  C   LYS A  11      -4.425 -10.165   5.934  1.00 10.18           C  
ATOM     40  O   LYS A  11      -4.341  -9.028   6.483  1.00  9.10           O  
ATOM     41  N   THR A  12      -3.315 -10.791   5.471  1.00  9.63           N  
ATOM     42  CA  THR A  12      -1.969 -10.160   5.362  1.00  9.85           C  
ATOM     43  C   THR A  12      -1.563 -10.616   3.991  1.00 11.66           C  
ATOM     44  O   THR A  12      -1.353 -11.834   3.799  1.00 12.33           O  
ATOM     45  N   ILE A  13      -1.558  -9.694   3.038  1.00 10.42           N  
ATOM     46  CA  ILE A  13      -1.395 -10.010   1.628  1.00 11.84           C  
ATOM     47  C   ILE A  13       0.106  -9.991   1.361  1.00 10.55           C  
ATOM     48  O   ILE A  13       0.862  -9.507   2.190  1.00 11.92           O  
ATOM     49  N   THR A  14       0.555 -10.481   0.213  1.00  9.39           N  
ATOM     50  CA  THR A  14       1.979 -10.421  -0.150  1.00  9.63           C  
ATOM     51  C   THR A  14       2.140  -9.854  -1.534  1.00 11.20           C  
ATOM     52  O   THR A  14       1.664 -10.499  -2.453  1.00 11.63           O  
ATOM     53  N   LEU A  15       2.875  -8.718  -1.724  1.00  8.29           N  
ATOM     54  CA  LEU A  15       3.070  -8.010  -2.951  1.00  9.03           C  
ATOM     55  C   LEU A  15       4.506  -8.103  -3.456  1.00  8.59           C  
ATOM     56  O   LEU A  15       5.458  -8.078  -2.731  1.00  7.79           O  
ATOM     57  N   GLU A  16       4.692  -8.254  -4.797  1.00 11.04           N  
ATOM     58  CA  GLU A  16       6.023  -8.279  -5.463  1.00 11.50           C  
ATOM     59  C   GLU A  16       6.232  -6.972  -6.243  1.00 10.13           C  
ATOM     60  O   GLU A  16       5.633  -6.675  -7.266  1.00  9.83           O  
ATOM     61  N   VAL A  17       7.039  -6.156  -5.656  1.00  8.99           N  
ATOM     62  CA  VAL A  17       7.294  -4.794  -6.180  1.00  8.85           C  
ATOM     63  C   VAL A  17       8.777  -4.518  -6.388  1.00  8.04           C  
ATOM     64  O   VAL A  17       9.703  -5.360  -6.125  1.00  8.99           O  
ATOM     65  N   GLU A  18       9.053  -3.343  -6.891  1.00  7.29           N  
ATOM     66  CA  GLU A  18      10.393  -2.883  -7.051  1.00  7.08           C  
ATOM     67  C   GLU A  18      10.379  -1.568  -6.184  1.00  6.45           C  
ATOM     68  O   GLU A  18       9.312  -1.023  -5.897  1.00  5.28           O  
ATOM     69  N   PRO A  19      11.569  -1.131  -5.733  1.00  7.24           N  
ATOM     70  CA  PRO A  19      11.679   0.081  -4.863  1.00  7.07           C  
ATOM     71  C   PRO A  19      11.228   1.406  -5.467  1.00  6.65           C  
ATOM     72  O   PRO A  19      10.860   2.329  -4.728  1.00  6.37           O  
ATOM     73  N   SER A  20      11.347   1.633  -6.813  1.00  6.80           N  
ATOM     74  CA  SER A  20      10.902   2.827  -7.565  1.00  6.28           C  
ATOM     75  C   SER A  20       9.544   2.683  -8.102  1.00  8.45           C  
ATOM     76  O   SER A  20       9.036   3.496  -8.870  1.00  7.26           O  
ATOM     77  N   ASP A  21       8.778   1.656  -7.706  1.00  7.50           N  
ATOM     78  CA  ASP A  21       7.288   1.701  -7.739  1.00  7.70           C  
ATOM     79  C   ASP A  21       6.685   2.866  -6.845  1.00  7.08           C  
ATOM     80  O   ASP A  21       7.067   3.132  -5.738  1.00  8.11           O  
ATOM     81  N   THR A  22       5.674   3.540  -7.410  1.00  5.37           N  
ATOM     82  CA  THR A  22       5.008   4.637  -6.602  1.00  6.01           C  
ATOM     83  C   THR A  22       3.844   4.095  -5.959  1.00  8.01           C  
ATOM     84  O   THR A  22       3.324   3.065  -6.380  1.00  8.11           O  
ATOM     85  N   ILE A  23       3.363   4.690  -4.899  1.00  8.32           N  
ATOM     86  CA  ILE A  23       2.278   4.187  -4.025  1.00  9.92           C  
ATOM     87  C   ILE A  23       1.010   3.908  -4.765  1.00 10.01           C  
ATOM     88  O   ILE A  23       0.212   2.991  -4.479  1.00  8.71           O  
ATOM     89  N   GLU A  24       0.704   4.706  -5.751  1.00  9.54           N  
ATOM     90  CA  GLU A  24      -0.358   4.568  -6.722  1.00 11.81           C  
ATOM     91  C   GLU A  24      -0.182   3.280  -7.609  1.00 11.14           C  
ATOM     92  O   GLU A  24      -1.151   2.498  -7.765  1.00 10.62           O  
ATOM     93  N   ASN A  25       1.067   2.962  -8.115  1.00  9.43           N  
ATOM     94  CA  ASN A  25       1.322   1.730  -8.769  1.00 10.96           C  
ATOM     95  C   ASN A  25       1.014   0.515  -7.855  1.00  9.68           C  
ATOM     96  O   ASN A  25       0.436  -0.481  -8.320  1.00  9.33           O  
ATOM     97  N   VAL A  26       1.395   0.647  -6.557  1.00  6.52           N  
ATOM     98  CA  VAL A  26       1.174  -0.347  -5.426  1.00  5.53           C  
ATOM     99  C   VAL A  26      -0.300  -0.621  -5.110  1.00  4.42           C  
ATOM    100  O   VAL A  26      -0.641  -1.749  -4.790  1.00  3.40           O  
ATOM    101  N   LYS A  27      -1.171   0.394  -5.164  1.00  2.64           N  
ATOM    102  CA  LYS A  27      -2.603   0.320  -4.995  1.00  4.14           C  
ATOM    103  C   LYS A  27      -3.252  -0.456  -6.152  1.00  5.58           C  
ATOM    104  O   LYS A  27      -4.131  -1.266  -5.952  1.00  4.11           O  
ATOM    105  N   ALA A  28      -2.748  -0.231  -7.364  1.00  6.61           N  
ATOM    106  CA  ALA A  28      -3.202  -1.147  -8.460  1.00  7.74           C  
ATOM    107  C   ALA A  28      -2.719  -2.595  -8.350  1.00  9.17           C  
ATOM    108  O   ALA A  28      -3.429  -3.488  -8.789  1.00 11.45           O  
ATOM    109  N   LYS A  29      -1.546  -2.936  -7.796  1.00  8.96           N  
ATOM    110  CA  LYS A  29      -1.087  -4.385  -7.561  1.00  7.90           C  
ATOM    111  C   LYS A  29      -1.977  -5.122  -6.512  1.00  6.92           C  
ATOM    112  O   LYS A  29      -2.277  -6.299  -6.644  1.00  6.87           O  
ATOM    113  N   ILE A  30      -2.502  -4.347  -5.510  1.00  4.57           N  
ATOM    114  CA  ILE A  30      -3.557  -4.824  -4.628  1.00  5.58           C  
ATOM    115  C   ILE A  30      -4.895  -4.939  -5.315  1.00  7.26           C  
ATOM    116  O   ILE A  30      -5.551  -5.906  -5.053  1.00  9.46           O  
ATOM    117  N   GLN A  31      -5.276  -3.998  -6.238  1.00  7.06           N  
ATOM    118  CA  GLN A  31      -6.530  -4.091  -7.072  1.00  8.67           C  
ATOM    119  C   GLN A  31      -6.532  -5.354  -7.929  1.00 10.90           C  
ATOM    120  O   GLN A  31      -7.536  -6.104  -7.987  1.00  9.63           O  
ATOM    121  N   ASP A  32      -5.388  -5.614  -8.555  1.00 10.93           N  
ATOM    122  CA  ASP A  32      -5.115  -6.831  -9.265  1.00 14.01           C  
ATOM    123  C   ASP A  32      -5.268  -8.153  -8.487  1.00 14.04           C  
ATOM    124  O   ASP A  32      -5.806  -9.167  -8.969  1.00 13.39           O  
ATOM    125  N   LYS A  33      -4.823  -8.122  -7.229  1.00 14.22           N  
ATOM    126  CA  LYS A  33      -4.923  -9.268  -6.364  1.00 14.00           C  
ATOM    127  C   LYS A  33      -6.268  -9.397  -5.658  1.00 12.37           C  
ATOM    128  O   LYS A  33      -6.941 -10.416  -5.730  1.00 12.17           O  
ATOM    129  N   GLU A  34      -6.680  -8.366  -4.908  1.00 10.11           N  
ATOM    130  CA  GLU A  34      -7.809  -8.359  -3.957  1.00 10.07           C  
ATOM    131  C   GLU A  34      -9.030  -7.601  -4.504  1.00  9.32           C  
ATOM    132  O   GLU A  34     -10.079  -7.579  -3.841  1.00 11.61           O  
ATOM    133  N   GLY A  35      -9.066  -6.959  -5.714  1.00  7.22           N  
ATOM    134  CA  GLY A  35     -10.224  -6.309  -6.351  1.00  6.29           C  
ATOM    135  C   GLY A  35     -10.626  -4.940  -5.884  1.00  6.93           C  
ATOM    136  O   GLY A  35     -11.659  -4.423  -6.310  1.00  7.41           O  
ATOM    137  N   ILE A  36      -9.928  -4.309  -4.957  1.00  5.86           N  
ATOM    138  CA  ILE A  36     -10.310  -3.061  -4.326  1.00  6.07           C  
ATOM    139  C   ILE A  36      -9.857  -1.908  -5.182  1.00  6.36           C  
ATOM    140  O   ILE A  36      -8.656  -1.763  -5.505  1.00  6.18           O  
ATOM    141  N   PRO A  37     -10.755  -1.006  -5.573  1.00  8.65           N  
ATOM    142  CA  PRO A  37     -10.451   0.278  -6.246  1.00  9.18           C  
ATOM    143  C   PRO A  37      -9.411   1.190  -5.568  1.00  9.85           C  
ATOM    144  O   PRO A  37      -9.656   1.455  -4.367  1.00  8.51           O  
ATOM    145  N   PRO A  38      -8.253   1.719  -6.114  1.00  8.71           N  
ATOM    146  CA  PRO A  38      -7.209   2.670  -5.605  1.00  9.08           C  
ATOM    147  C   PRO A  38      -7.759   3.827  -4.845  1.00  9.28           C  
ATOM    148  O   PRO A  38      -7.166   4.249  -3.886  1.00  6.50           O  
ATOM    149  N   ASP A  39      -8.972   4.345  -5.208  1.00 11.20           N  
ATOM    150  CA  ASP A  39      -9.639   5.482  -4.590  1.00 14.96           C  
ATOM    151  C   ASP A  39     -10.149   5.157  -3.224  1.00 13.99           C  
ATOM    152  O   ASP A  39     -10.217   6.034  -2.379  1.00 13.75           O  
ATOM    153  N   GLN A  40     -10.573   3.892  -2.999  1.00 11.60           N  
ATOM    154  CA  GLN A  40     -11.027   3.396  -1.713  1.00 10.76           C  
ATOM    155  C   GLN A  40      -9.867   2.881  -0.848  1.00  8.01           C  
ATOM    156  O   GLN A  40      -9.895   2.593   0.363  1.00  8.96           O  
ATOM    157  N   GLN A  41      -8.666   2.768  -1.408  1.00  6.52           N  
ATOM    158  CA  GLN A  41      -7.552   2.318  -0.663  1.00  3.87           C  
ATOM    159  C   GLN A  41      -6.725   3.513  -0.053  1.00  4.79           C  
ATOM    160  O   GLN A  41      -6.482   4.478  -0.800  1.00  6.34           O  
ATOM    161  N   ARG A  42      -6.305   3.374   1.223  1.00  5.73           N  
ATOM    162  CA  ARG A  42      -5.420   4.274   1.985  1.00  6.97           C  
ATOM    163  C   ARG A  42      -4.314   3.402   2.605  1.00  7.15           C  
ATOM    164  O   ARG A  42      -4.582   2.344   3.149  1.00  7.33           O  
ATOM    165  N   LEU A  43      -3.030   3.738   2.472  1.00  4.65           N  
ATOM    166  CA  LEU A  43      -1.909   2.899   2.958  1.00  3.51           C  
ATOM    167  C   LEU A  43      -1.153   3.634   4.092  1.00  5.56           C  
ATOM    168  O   LEU A  43      -0.784   4.828   4.130  1.00  4.19           O  
ATOM    169  N   ILE A  44      -0.859   2.792   5.119  1.00  4.58           N  
ATOM    170  CA  ILE A  44      -0.307   3.215   6.361  1.00  5.55           C  
ATOM    171  C   ILE A  44       0.772   2.193   6.650  1.00  5.46           C  
ATOM    172  O   ILE A  44       0.627   1.012   6.322  1.00  6.04           O  
ATOM    173  N   PHE A  45       1.966   2.563   7.125  1.00  6.75           N  
ATOM    174  CA  PHE A  45       3.084   1.712   7.476  1.00  4.70           C  
ATOM    175  C   PHE A  45       3.691   2.396   8.674  1.00  6.34           C  
ATOM    176  O   PHE A  45       4.199   3.542   8.584  1.00  5.45           O  
ATOM    177  N   ALA A  46       3.760   1.741   9.872  1.00  6.53           N  
ATOM    178  CA  ALA A  46       4.470   2.098  11.103  1.00  7.15           C  
ATOM    179  C   ALA A  46       3.915   3.414  11.697  1.00  9.00           C  
ATOM    180  O   ALA A  46       4.568   4.226  12.299  1.00 11.15           O  
ATOM    181  N   GLY A  47       2.570   3.606  11.579  1.00  9.35           N  
ATOM    182  CA  GLY A  47       1.891   4.856  11.953  1.00 11.68           C  
ATOM    183  C   GLY A  47       1.857   5.917  10.934  1.00 11.14           C  
ATOM    184  O   GLY A  47       1.084   6.914  11.093  1.00 13.93           O  
ATOM    185  N   LYS A  48       2.579   5.815   9.808  1.00 10.47           N  
ATOM    186  CA  LYS A  48       2.728   6.825   8.794  1.00  8.82           C  
ATOM    187  C   LYS A  48       1.980   6.576   7.505  1.00  7.68           C  
ATOM    188  O   LYS A  48       2.199   5.534   6.860  1.00  6.47           O  
ATOM    189  N   GLN A  49       1.022   7.509   7.175  1.00  8.89           N  
ATOM    190  CA  GLN A  49       0.419   7.555   5.836  1.00  7.18           C  
ATOM    191  C   GLN A  49       1.338   7.695   4.652  1.00  8.23           C  
ATOM    192  O   GLN A  49       2.265   8.486   4.577  1.00  9.70           O  
ATOM    193  N   LEU A  50       1.030   6.907   3.607  1.00  6.51           N  
ATOM    194  CA  LEU A  50       1.865   6.907   2.391  1.00  7.41           C  
ATOM    195  C   LEU A  50       1.140   7.630   1.206  1.00  8.27           C  
ATOM    196  O   LEU A  50       0.065   7.219   0.737  1.00  8.34           O  
ATOM    197  N   GLU A  51       1.817   8.695   0.659  1.00  9.43           N  
ATOM    198  CA  GLU A  51       1.253   9.605  -0.295  1.00 11.90           C  
ATOM    199  C   GLU A  51       1.373   9.035  -1.750  1.00 11.49           C  
ATOM    200  O   GLU A  51       2.429   8.647  -2.243  1.00  9.88           O  
ATOM    201  N   ASP A  52       0.231   9.071  -2.445  1.00 12.71           N  
ATOM    202  CA  ASP A  52       0.039   8.356  -3.726  1.00 16.56           C  
ATOM    203  C   ASP A  52       1.078   8.494  -4.774  1.00 15.83           C  
ATOM    204  O   ASP A  52       1.463   7.551  -5.474  1.00 17.21           O  
ATOM    205  N   GLY A  53       1.594   9.781  -4.884  1.00 15.00           N  
ATOM    206  CA  GLY A  53       2.717  10.103  -5.807  1.00 11.77           C  
ATOM    207  C   GLY A  53       4.146   9.878  -5.277  1.00 11.10           C  
ATOM    208  O   GLY A  53       5.096  10.206  -6.038  1.00 11.25           O  
ATOM    209  N   ARG A  54       4.420   9.301  -4.104  1.00  8.53           N  
ATOM    210  CA  ARG A  54       5.756   9.008  -3.593  1.00  9.05           C  
ATOM    211  C   ARG A  54       6.073   7.584  -3.994  1.00  8.96           C  
ATOM    212  O   ARG A  54       5.295   6.775  -4.469  1.00 11.60           O  
ATOM    213  N   THR A  55       7.336   7.229  -3.811  1.00  9.05           N  
ATOM    214  CA  THR A  55       7.934   5.955  -4.093  1.00  9.03           C  
ATOM    215  C   THR A  55       8.287   5.313  -2.820  1.00  8.15           C  
ATOM    216  O   THR A  55       8.382   5.935  -1.774  1.00  5.91           O  
ATOM    217  N   LEU A  56       8.428   3.939  -2.892  1.00  6.91           N  
ATOM    218  CA  LEU A  56       8.777   3.070  -1.763  1.00  8.29           C  
ATOM    219  C   LEU A  56      10.105   3.332  -1.098  1.00  8.05           C  
ATOM    220  O   LEU A  56      10.285   3.409   0.134  1.00 10.17           O  
ATOM    221  N   SER A  57      11.147   3.636  -1.945  1.00  8.92           N  
ATOM    222  CA  SER A  57      12.451   4.059  -1.562  1.00  9.00           C  
ATOM    223  C   SER A  57      12.439   5.390  -0.807  1.00  9.44           C  
ATOM    224  O   SER A  57      13.266   5.597   0.087  1.00 10.91           O  
ATOM    225  N   ASP A  58      11.542   6.335  -1.130  1.00  9.11           N  
ATOM    226  CA  ASP A  58      11.485   7.644  -0.475  1.00  7.91           C  
ATOM    227  C   ASP A  58      11.051   7.476   1.015  1.00  9.12           C  
ATOM    228  O   ASP A  58      11.287   8.282   1.884  1.00  8.61           O  
ATOM    229  N   TYR A  59      10.399   6.353   1.281  1.00  7.97           N  
ATOM    230  CA  TYR A  59       9.923   5.961   2.598  1.00  8.45           C  
ATOM    231  C   TYR A  59      10.751   4.910   3.258  1.00 10.98           C  
ATOM    232  O   TYR A  59      10.495   4.599   4.399  1.00 12.95           O  
ATOM    233  N   ASN A  60      11.780   4.470   2.480  1.00 12.38           N  
ATOM    234  CA  ASN A  60      12.817   3.529   2.794  1.00 13.94           C  
ATOM    235  C   ASN A  60      12.331   2.121   3.157  1.00 14.16           C  
ATOM    236  O   ASN A  60      12.900   1.381   3.970  1.00 14.26           O  
ATOM    237  N   ILE A  61      11.322   1.700   2.409  1.00 11.08           N  
ATOM    238  CA  ILE A  61      10.627   0.455   2.574  1.00 11.78           C  
ATOM    239  C   ILE A  61      11.331  -0.635   1.806  1.00 13.74           C  
ATOM    240  O   ILE A  61      11.297  -0.752   0.592  1.00 14.60           O  
ATOM    241  N   GLN A  62      12.116  -1.384   2.579  1.00 13.97           N  
ATOM    242  CA  GLN A  62      12.894  -2.528   2.215  1.00 15.52           C  
ATOM    243  C   GLN A  62      12.177  -3.862   2.246  1.00 13.94           C  
ATOM    244  O   GLN A  62      10.910  -3.995   2.357  1.00 12.15           O  
ATOM    245  N   LYS A  63      12.938  -4.909   1.864  1.00 11.73           N  
ATOM    246  CA  LYS A  63      12.563  -6.327   1.635  1.00 11.97           C  
ATOM    247  C   LYS A  63      11.806  -6.893   2.832  1.00 10.41           C  
ATOM    248  O   LYS A  63      12.353  -6.997   3.938  1.00  9.59           O  
ATOM    249  N   GLU A  64      10.512  -7.271   2.647  1.00 10.04           N  
ATOM    250  CA  GLU A  64       9.694  -7.951   3.613  1.00 10.94           C  
ATOM    251  C   GLU A  64       9.163  -7.093   4.711  1.00  9.74           C  
ATOM    252  O   GLU A  64       8.573  -7.628   5.661  1.00  9.42           O  
ATOM    253  N   SER A  65       9.135  -5.721   4.529  1.00  6.85           N  
ATOM    254  CA  SER A  65       8.408  -4.832   5.341  1.00  6.90           C  
ATOM    255  C   SER A  65       6.888  -5.146   5.283  1.00  4.72           C  
ATOM    256  O   SER A  65       6.372  -5.600   4.261  1.00  3.91           O  
ATOM    257  N   THR A  66       6.144  -4.867   6.425  1.00  4.48           N  
ATOM    258  CA  THR A  66       4.738  -5.244   6.461  1.00  3.80           C  
ATOM    259  C   THR A  66       4.069  -3.899   6.609  1.00  4.60           C  
ATOM    260  O   THR A  66       4.270  -3.197   7.546  1.00  5.33           O  
ATOM    261  N   LEU A  67       3.192  -3.554   5.698  1.00  4.17           N  
ATOM    262  CA  LEU A  67       2.422  -2.347   5.633  1.00  3.85           C  
ATOM    263  C   LEU A  67       0.962  -2.647   6.113  1.00  3.80           C  
ATOM    264  O   LEU A  67       0.516  -3.705   6.524  1.00  5.54           O  
ATOM    265  N   HIS A  68       0.076  -1.647   6.163  1.00  2.94           N  
ATOM    266  CA  HIS A  68      -1.345  -1.685   6.548  1.00  4.17           C  
ATOM    267  C   HIS A  68      -2.166  -0.973   5.584  1.00  5.32           C  
ATOM    268  O   HIS A  68      -1.736  -0.053   4.910  1.00  7.70           O  
ATOM    269  N   LEU A  69      -3.397  -1.482   5.296  1.00  5.29           N  
ATOM    270  CA  LEU A  69      -4.276  -1.019   4.298  1.00  3.97           C  
ATOM    271  C   LEU A  69      -5.549  -0.758   5.015  1.00  5.07           C  
ATOM    272  O   LEU A  69      -6.119  -1.704   5.569  1.00  4.34           O  
ATOM    273  N   VAL A  70      -5.993   0.537   4.977  1.00  4.29           N  
ATOM    274  CA  VAL A  70      -7.222   0.903   5.633  1.00  6.26           C  
ATOM    275  C   VAL A  70      -8.071   1.468   4.544  1.00  9.22           C  
ATOM    276  O   VAL A  70      -7.614   2.201   3.671  1.00  9.36           O  
TER
ENDMDL
MODEL      16
ATOM      1  N   GLN A   2      10.554  -8.583  -1.563  1.00  9.27           N  
ATOM      2  CA  GLN A   2       9.222  -8.894  -1.155  1.00  9.07           C  
ATOM      3  C   GLN A   2       8.655  -7.970  -0.086  1.00  8.72           C  
ATOM      4  O   GLN A   2       9.347  -7.536   0.865  1.00  8.22           O  
ATOM      5  N   ILE A   3       7.366  -7.646  -0.124  1.00  5.87           N  
ATOM      6  CA  ILE A   3       6.608  -6.927   0.938  1.00  5.07           C  
ATOM      7  C   ILE A   3       5.351  -7.679   1.281  1.00  4.01           C  
ATOM      8  O   ILE A   3       4.987  -8.668   0.633  1.00  4.61           O  
ATOM      9  N   PHE A   4       4.641  -7.230   2.316  1.00  4.55           N  
ATOM     10  CA  PHE A   4       3.323  -7.776   2.671  1.00  4.68           C  
ATOM     11  C   PHE A   4       2.452  -6.609   2.896  1.00  5.30           C  
ATOM     12  O   PHE A   4       2.814  -5.610   3.462  1.00  5.58           O  
ATOM     13  N   VAL A   5       1.210  -6.757   2.369  1.00  4.44           N  
ATOM     14  CA  VAL A   5       0.191  -5.806   2.758  1.00  3.87           C  
ATOM     15  C   VAL A   5      -0.715  -6.549   3.725  1.00  4.93           C  
ATOM     16  O   VAL A   5      -1.222  -7.675   3.438  1.00  6.84           O  
ATOM     17  N   LYS A   6      -1.030  -5.989   4.892  1.00  6.04           N  
ATOM     18  CA  LYS A   6      -1.916  -6.593   5.830  1.00  6.12           C  
ATOM     19  C   LYS A   6      -3.086  -5.695   6.202  1.00  6.57           C  
ATOM     20  O   LYS A   6      -2.916  -4.449   6.359  1.00  5.76           O  
ATOM     21  N   THR A   7      -4.295  -6.298   6.286  1.00  7.41           N  
ATOM     22  CA  THR A   7      -5.581  -5.582   6.518  1.00  7.48           C  
ATOM     23  C   THR A   7      -6.055  -5.560   7.944  1.00  8.75           C  
ATOM     24  O   THR A   7      -5.489  -6.088   8.934  1.00  8.58           O  
ATOM     25  N   LEU A   8      -7.142  -4.836   8.093  1.00  9.84           N  
ATOM     26  CA  LEU A   8      -7.866  -4.645   9.323  1.00 14.15           C  
ATOM     27  C   LEU A   8      -8.344  -5.948   9.987  1.00 17.37           C  
ATOM     28  O   LEU A   8      -8.137  -6.197  11.192  1.00 17.01           O  
ATOM     29  N   THR A   9      -8.842  -6.850   9.109  1.00 18.33           N  
ATOM     30  CA  THR A   9      -9.455  -8.133   9.498  1.00 19.24           C  
ATOM     31  C   THR A   9      -8.423  -9.268   9.523  1.00 19.48           C  
ATOM     32  O   THR A   9      -8.739 -10.370   9.862  1.00 23.14           O  
ATOM     33  N   GLY A  10      -7.162  -8.912   9.256  1.00 19.43           N  
ATOM     34  CA  GLY A  10      -5.949  -9.673   9.449  1.00 18.74           C  
ATOM     35  C   GLY A  10      -5.531 -10.421   8.185  1.00 17.62           C  
ATOM     36  O   GLY A  10      -4.597 -11.225   8.188  1.00 19.74           O  
ATOM     37  N   LYS A  11      -6.194 -10.211   6.978  1.00 13.56           N  
ATOM     38  CA  LYS A  11      -5.777 -10.795   5.718  1.00 11.91           C  
ATOM     39  C   LYS A  11      -4.411 -10.378   5.319  1.00 10.18           C  
ATOM     40  O   LYS A  11      -4.012  -9.238   5.537  1.00  9.10           O  
ATOM     41  N   THR A  12      -3.640 -11.270   4.730  1.00  9.63           N  
ATOM     42  CA  THR A  12      -2.282 -11.120   4.283  1.00  9.85           C  
ATOM     43  C   THR A  12      -2.143 -11.207   2.780  1.00 11.66           C  
ATOM     44  O   THR A  12      -2.526 -12.189   2.162  1.00 12.33           O  
ATOM     45  N   ILE A  13      -1.645 -10.126   2.095  1.00 10.42           N  
ATOM     46  CA  ILE A  13      -1.231 -10.132   0.644  1.00 11.84           C  
ATOM     47  C   ILE A  13       0.287 -10.051   0.474  1.00 10.55           C  
ATOM     48  O   ILE A  13       0.898  -9.138   0.997  1.00 11.92           O  
ATOM     49  N   THR A  14       0.900 -10.893  -0.372  1.00  9.39           N  
ATOM     50  CA  THR A  14       2.374 -11.011  -0.499  1.00  9.63           C  
ATOM     51  C   THR A  14       2.719 -10.509  -1.879  1.00 11.20           C  
ATOM     52  O   THR A  14       2.293 -11.074  -2.851  1.00 11.63           O  
ATOM     53  N   LEU A  15       3.543  -9.451  -1.960  1.00  8.29           N  
ATOM     54  CA  LEU A  15       3.942  -8.879  -3.236  1.00  9.03           C  
ATOM     55  C   LEU A  15       5.446  -8.962  -3.376  1.00  8.59           C  
ATOM     56  O   LEU A  15       6.244  -8.648  -2.461  1.00  7.79           O  
ATOM     57  N   GLU A  16       5.929  -9.283  -4.619  1.00 11.04           N  
ATOM     58  CA  GLU A  16       7.249  -9.074  -5.133  1.00 11.50           C  
ATOM     59  C   GLU A  16       7.349  -7.681  -5.785  1.00 10.13           C  
ATOM     60  O   GLU A  16       6.568  -7.396  -6.670  1.00  9.83           O  
ATOM     61  N   VAL A  17       8.204  -6.791  -5.302  1.00  8.99           N  
ATOM     62  CA  VAL A  17       8.248  -5.435  -5.601  1.00  8.85           C  
ATOM     63  C   VAL A  17       9.706  -4.914  -5.682  1.00  8.04           C  
ATOM     64  O   VAL A  17      10.640  -5.548  -5.191  1.00  8.99           O  
ATOM     65  N   GLU A  18       9.935  -3.727  -6.289  1.00  7.29           N  
ATOM     66  CA  GLU A  18      11.299  -3.047  -6.370  1.00  7.08           C  
ATOM     67  C   GLU A  18      11.306  -1.773  -5.547  1.00  6.45           C  
ATOM     68  O   GLU A  18      10.271  -1.101  -5.487  1.00  5.28           O  
ATOM     69  N   PRO A  19      12.440  -1.352  -4.947  1.00  7.24           N  
ATOM     70  CA  PRO A  19      12.611  -0.092  -4.259  1.00  7.07           C  
ATOM     71  C   PRO A  19      12.156   1.183  -5.036  1.00  6.65           C  
ATOM     72  O   PRO A  19      11.667   2.030  -4.345  1.00  6.37           O  
ATOM     73  N   SER A  20      12.276   1.286  -6.330  1.00  6.80           N  
ATOM     74  CA  SER A  20      11.791   2.439  -7.109  1.00  6.28           C  
ATOM     75  C   SER A  20      10.328   2.314  -7.494  1.00  8.45           C  
ATOM     76  O   SER A  20       9.864   3.161  -8.215  1.00  7.26           O  
ATOM     77  N   ASP A  21       9.587   1.285  -7.081  1.00  7.50           N  
ATOM     78  CA  ASP A  21       8.125   1.221  -7.244  1.00  7.70           C  
ATOM     79  C   ASP A  21       7.457   2.232  -6.402  1.00  7.08           C  
ATOM     80  O   ASP A  21       7.907   2.434  -5.257  1.00  8.11           O  
ATOM     81  N   THR A  22       6.411   2.930  -6.868  1.00  5.37           N  
ATOM     82  CA  THR A  22       5.679   4.008  -6.205  1.00  6.01           C  
ATOM     83  C   THR A  22       4.604   3.442  -5.339  1.00  8.01           C  
ATOM     84  O   THR A  22       4.246   2.257  -5.458  1.00  8.11           O  
ATOM     85  N   ILE A  23       4.073   4.248  -4.408  1.00  8.32           N  
ATOM     86  CA  ILE A  23       3.055   3.702  -3.521  1.00  9.92           C  
ATOM     87  C   ILE A  23       1.752   3.491  -4.307  1.00 10.01           C  
ATOM     88  O   ILE A  23       0.896   2.627  -4.011  1.00  8.71           O  
ATOM     89  N   GLU A  24       1.583   4.272  -5.364  1.00  9.54           N  
ATOM     90  CA  GLU A  24       0.537   4.142  -6.338  1.00 11.81           C  
ATOM     91  C   GLU A  24       0.510   2.743  -7.101  1.00 11.14           C  
ATOM     92  O   GLU A  24      -0.550   2.162  -7.191  1.00 10.62           O  
ATOM     93  N   ASN A  25       1.747   2.258  -7.537  1.00  9.43           N  
ATOM     94  CA  ASN A  25       1.906   0.918  -8.052  1.00 10.96           C  
ATOM     95  C   ASN A  25       1.372  -0.140  -7.067  1.00  9.68           C  
ATOM     96  O   ASN A  25       0.766  -1.161  -7.414  1.00  9.33           O  
ATOM     97  N   VAL A  26       1.642   0.062  -5.768  1.00  6.52           N  
ATOM     98  CA  VAL A  26       1.197  -0.839  -4.743  1.00  5.53           C  
ATOM     99  C   VAL A  26      -0.335  -0.912  -4.548  1.00  4.42           C  
ATOM    100  O   VAL A  26      -0.906  -2.037  -4.366  1.00  3.40           O  
ATOM    101  N   LYS A  27      -0.992   0.223  -4.629  1.00  2.64           N  
ATOM    102  CA  LYS A  27      -2.450   0.260  -4.706  1.00  4.14           C  
ATOM    103  C   LYS A  27      -3.122  -0.315  -5.989  1.00  5.58           C  
ATOM    104  O   LYS A  27      -4.168  -0.990  -5.986  1.00  4.11           O  
ATOM    105  N   ALA A  28      -2.434  -0.201  -7.199  1.00  6.61           N  
ATOM    106  CA  ALA A  28      -2.778  -0.856  -8.437  1.00  7.74           C  
ATOM    107  C   ALA A  28      -2.702  -2.385  -8.442  1.00  9.17           C  
ATOM    108  O   ALA A  28      -3.564  -3.090  -8.955  1.00 11.45           O  
ATOM    109  N   LYS A  29      -1.696  -2.961  -7.747  1.00  8.96           N  
ATOM    110  CA  LYS A  29      -1.583  -4.333  -7.385  1.00  7.90           C  
ATOM    111  C   LYS A  29      -2.719  -4.837  -6.499  1.00  6.92           C  
ATOM    112  O   LYS A  29      -3.246  -5.959  -6.711  1.00  6.87           O  
ATOM    113  N   ILE A  30      -3.139  -4.083  -5.481  1.00  4.57           N  
ATOM    114  CA  ILE A  30      -4.168  -4.417  -4.638  1.00  5.58           C  
ATOM    115  C   ILE A  30      -5.527  -4.380  -5.340  1.00  7.26           C  
ATOM    116  O   ILE A  30      -6.385  -5.268  -5.226  1.00  9.46           O  
ATOM    117  N   GLN A  31      -5.749  -3.425  -6.252  1.00  7.06           N  
ATOM    118  CA  GLN A  31      -6.866  -3.314  -7.151  1.00  8.67           C  
ATOM    119  C   GLN A  31      -6.988  -4.627  -7.942  1.00 10.90           C  
ATOM    120  O   GLN A  31      -8.074  -5.191  -8.037  1.00  9.63           O  
ATOM    121  N   ASP A  32      -5.885  -5.203  -8.505  1.00 10.93           N  
ATOM    122  CA  ASP A  32      -5.881  -6.508  -9.140  1.00 14.01           C  
ATOM    123  C   ASP A  32      -6.214  -7.695  -8.285  1.00 14.04           C  
ATOM    124  O   ASP A  32      -7.028  -8.518  -8.614  1.00 13.39           O  
ATOM    125  N   LYS A  33      -5.574  -7.818  -7.046  1.00 14.22           N  
ATOM    126  CA  LYS A  33      -5.667  -8.986  -6.156  1.00 14.00           C  
ATOM    127  C   LYS A  33      -6.992  -9.176  -5.529  1.00 12.37           C  
ATOM    128  O   LYS A  33      -7.598 -10.273  -5.486  1.00 12.17           O  
ATOM    129  N   GLU A  34      -7.534  -7.994  -5.117  1.00 10.11           N  
ATOM    130  CA  GLU A  34      -8.672  -7.926  -4.226  1.00 10.07           C  
ATOM    131  C   GLU A  34      -9.825  -7.212  -4.799  1.00  9.32           C  
ATOM    132  O   GLU A  34     -10.945  -7.295  -4.248  1.00 11.61           O  
ATOM    133  N   GLY A  35      -9.683  -6.553  -5.965  1.00  7.22           N  
ATOM    134  CA  GLY A  35     -10.815  -6.025  -6.774  1.00  6.29           C  
ATOM    135  C   GLY A  35     -11.162  -4.665  -6.286  1.00  6.93           C  
ATOM    136  O   GLY A  35     -12.172  -4.062  -6.706  1.00  7.41           O  
ATOM    137  N   ILE A  36     -10.396  -4.157  -5.336  1.00  5.86           N  
ATOM    138  CA  ILE A  36     -10.593  -2.939  -4.568  1.00  6.07           C  
ATOM    139  C   ILE A  36     -10.081  -1.683  -5.298  1.00  6.36           C  
ATOM    140  O   ILE A  36      -8.842  -1.582  -5.278  1.00  6.18           O  
ATOM    141  N   PRO A  37     -10.836  -0.705  -5.833  1.00  8.65           N  
ATOM    142  CA  PRO A  37     -10.284   0.559  -6.320  1.00  9.18           C  
ATOM    143  C   PRO A  37      -9.201   1.291  -5.459  1.00  9.85           C  
ATOM    144  O   PRO A  37      -9.431   1.392  -4.257  1.00  8.51           O  
ATOM    145  N   PRO A  38      -8.099   1.775  -5.968  1.00  8.71           N  
ATOM    146  CA  PRO A  38      -7.219   2.645  -5.243  1.00  9.08           C  
ATOM    147  C   PRO A  38      -7.805   3.902  -4.637  1.00  9.28           C  
ATOM    148  O   PRO A  38      -7.266   4.296  -3.594  1.00  6.50           O  
ATOM    149  N   ASP A  39      -8.957   4.415  -5.143  1.00 11.20           N  
ATOM    150  CA  ASP A  39      -9.710   5.357  -4.425  1.00 14.96           C  
ATOM    151  C   ASP A  39     -10.327   4.802  -3.055  1.00 13.99           C  
ATOM    152  O   ASP A  39     -10.666   5.595  -2.147  1.00 13.75           O  
ATOM    153  N   GLN A  40     -10.538   3.513  -2.854  1.00 11.60           N  
ATOM    154  CA  GLN A  40     -11.032   3.028  -1.521  1.00 10.76           C  
ATOM    155  C   GLN A  40      -9.888   2.487  -0.670  1.00  8.01           C  
ATOM    156  O   GLN A  40     -10.134   1.992   0.361  1.00  8.96           O  
ATOM    157  N   GLN A  41      -8.621   2.624  -1.069  1.00  6.52           N  
ATOM    158  CA  GLN A  41      -7.485   2.159  -0.323  1.00  3.87           C  
ATOM    159  C   GLN A  41      -6.595   3.284   0.204  1.00  4.79           C  
ATOM    160  O   GLN A  41      -6.152   4.140  -0.582  1.00  6.34           O  
ATOM    161  N   ARG A  42      -6.403   3.262   1.487  1.00  5.73           N  
ATOM    162  CA  ARG A  42      -5.421   4.075   2.195  1.00  6.97           C  
ATOM    163  C   ARG A  42      -4.315   3.202   2.723  1.00  7.15           C  
ATOM    164  O   ARG A  42      -4.571   2.073   3.169  1.00  7.33           O  
ATOM    165  N   LEU A  43      -3.042   3.728   2.741  1.00  4.65           N  
ATOM    166  CA  LEU A  43      -1.896   2.932   3.070  1.00  3.51           C  
ATOM    167  C   LEU A  43      -1.197   3.703   4.212  1.00  5.56           C  
ATOM    168  O   LEU A  43      -0.836   4.881   4.144  1.00  4.19           O  
ATOM    169  N   ILE A  44      -1.047   3.030   5.344  1.00  4.58           N  
ATOM    170  CA  ILE A  44      -0.396   3.460   6.532  1.00  5.55           C  
ATOM    171  C   ILE A  44       0.829   2.603   6.768  1.00  5.46           C  
ATOM    172  O   ILE A  44       0.880   1.379   6.751  1.00  6.04           O  
ATOM    173  N   PHE A  45       1.932   3.342   7.006  1.00  6.75           N  
ATOM    174  CA  PHE A  45       3.244   2.834   7.360  1.00  4.70           C  
ATOM    175  C   PHE A  45       4.007   3.919   8.135  1.00  6.34           C  
ATOM    176  O   PHE A  45       4.090   5.124   7.802  1.00  5.45           O  
ATOM    177  N   ALA A  46       4.598   3.526   9.290  1.00  6.53           N  
ATOM    178  CA  ALA A  46       5.286   4.423  10.210  1.00  7.15           C  
ATOM    179  C   ALA A  46       4.497   5.586  10.817  1.00  9.00           C  
ATOM    180  O   ALA A  46       5.123   6.665  11.088  1.00 11.15           O  
ATOM    181  N   GLY A  47       3.131   5.410  10.949  1.00  9.35           N  
ATOM    182  CA  GLY A  47       2.158   6.371  11.441  1.00 11.68           C  
ATOM    183  C   GLY A  47       1.727   7.423  10.407  1.00 11.14           C  
ATOM    184  O   GLY A  47       1.005   8.434  10.582  1.00 13.93           O  
ATOM    185  N   LYS A  48       2.383   7.217   9.276  1.00 10.47           N  
ATOM    186  CA  LYS A  48       2.286   8.188   8.158  1.00  8.82           C  
ATOM    187  C   LYS A  48       1.246   7.663   7.174  1.00  7.68           C  
ATOM    188  O   LYS A  48       1.213   6.522   6.833  1.00  6.47           O  
ATOM    189  N   GLN A  49       0.411   8.561   6.599  1.00  8.89           N  
ATOM    190  CA  GLN A  49      -0.524   8.155   5.572  1.00  7.18           C  
ATOM    191  C   GLN A  49       0.066   8.463   4.249  1.00  8.23           C  
ATOM    192  O   GLN A  49       0.560   9.565   4.008  1.00  9.70           O  
ATOM    193  N   LEU A  50       0.231   7.406   3.421  1.00  6.51           N  
ATOM    194  CA  LEU A  50       1.256   7.525   2.429  1.00  7.41           C  
ATOM    195  C   LEU A  50       0.752   8.217   1.137  1.00  8.27           C  
ATOM    196  O   LEU A  50      -0.414   8.074   0.753  1.00  8.34           O  
ATOM    197  N   GLU A  51       1.654   8.968   0.434  1.00  9.43           N  
ATOM    198  CA  GLU A  51       1.477   9.653  -0.841  1.00 11.90           C  
ATOM    199  C   GLU A  51       1.389   8.650  -2.039  1.00 11.49           C  
ATOM    200  O   GLU A  51       1.633   7.456  -1.844  1.00  9.88           O  
ATOM    201  N   ASP A  52       0.979   9.109  -3.242  1.00 12.71           N  
ATOM    202  CA  ASP A  52       0.895   8.242  -4.479  1.00 16.56           C  
ATOM    203  C   ASP A  52       2.245   8.032  -5.195  1.00 15.83           C  
ATOM    204  O   ASP A  52       2.666   6.968  -5.530  1.00 17.21           O  
ATOM    205  N   GLY A  53       2.911   9.111  -5.524  1.00 15.00           N  
ATOM    206  CA  GLY A  53       4.214   9.254  -6.255  1.00 11.77           C  
ATOM    207  C   GLY A  53       5.477   8.958  -5.507  1.00 11.10           C  
ATOM    208  O   GLY A  53       6.535   8.753  -6.177  1.00 11.25           O  
ATOM    209  N   ARG A  54       5.460   8.861  -4.195  1.00  8.53           N  
ATOM    210  CA  ARG A  54       6.596   8.422  -3.374  1.00  9.05           C  
ATOM    211  C   ARG A  54       6.893   6.996  -3.675  1.00  8.96           C  
ATOM    212  O   ARG A  54       5.976   6.203  -3.866  1.00 11.60           O  
ATOM    213  N   THR A  55       8.214   6.531  -3.565  1.00  9.05           N  
ATOM    214  CA  THR A  55       8.546   5.146  -3.776  1.00  9.03           C  
ATOM    215  C   THR A  55       8.754   4.388  -2.451  1.00  8.15           C  
ATOM    216  O   THR A  55       8.748   5.047  -1.430  1.00  5.91           O  
ATOM    217  N   LEU A  56       8.965   3.094  -2.496  1.00  6.91           N  
ATOM    218  CA  LEU A  56       9.332   2.253  -1.356  1.00  8.29           C  
ATOM    219  C   LEU A  56      10.652   2.710  -0.671  1.00  8.05           C  
ATOM    220  O   LEU A  56      10.833   2.739   0.561  1.00 10.17           O  
ATOM    221  N   SER A  57      11.585   3.041  -1.557  1.00  8.92           N  
ATOM    222  CA  SER A  57      12.885   3.555  -1.138  1.00  9.00           C  
ATOM    223  C   SER A  57      12.830   4.908  -0.371  1.00  9.44           C  
ATOM    224  O   SER A  57      13.625   5.057   0.525  1.00 10.91           O  
ATOM    225  N   ASP A  58      11.843   5.762  -0.681  1.00  9.11           N  
ATOM    226  CA  ASP A  58      11.664   7.066  -0.026  1.00  7.91           C  
ATOM    227  C   ASP A  58      11.096   6.922   1.440  1.00  9.12           C  
ATOM    228  O   ASP A  58      11.420   7.707   2.374  1.00  8.61           O  
ATOM    229  N   TYR A  59      10.204   5.917   1.583  1.00  7.97           N  
ATOM    230  CA  TYR A  59       9.612   5.721   2.836  1.00  8.45           C  
ATOM    231  C   TYR A  59      10.312   4.679   3.672  1.00 10.98           C  
ATOM    232  O   TYR A  59       9.847   4.269   4.729  1.00 12.95           O  
ATOM    233  N   ASN A  60      11.518   4.219   3.134  1.00 12.38           N  
ATOM    234  CA  ASN A  60      12.204   3.202   3.922  1.00 13.94           C  
ATOM    235  C   ASN A  60      11.505   1.934   4.111  1.00 14.16           C  
ATOM    236  O   ASN A  60      11.528   1.222   5.112  1.00 14.26           O  
ATOM    237  N   ILE A  61      10.758   1.544   3.027  1.00 11.08           N  
ATOM    238  CA  ILE A  61      10.110   0.287   2.918  1.00 11.78           C  
ATOM    239  C   ILE A  61      11.151  -0.701   2.407  1.00 13.74           C  
ATOM    240  O   ILE A  61      11.855  -0.473   1.458  1.00 14.60           O  
ATOM    241  N   GLN A  62      11.272  -1.801   3.224  1.00 13.97           N  
ATOM    242  CA  GLN A  62      12.356  -2.718   3.179  1.00 15.52           C  
ATOM    243  C   GLN A  62      11.797  -4.156   2.970  1.00 13.94           C  
ATOM    244  O   GLN A  62      10.599  -4.447   2.828  1.00 12.15           O  
ATOM    245  N   LYS A  63      12.658  -5.154   2.844  1.00 11.73           N  
ATOM    246  CA  LYS A  63      12.220  -6.518   2.641  1.00 11.97           C  
ATOM    247  C   LYS A  63      11.367  -7.161   3.794  1.00 10.41           C  
ATOM    248  O   LYS A  63      11.655  -7.145   4.966  1.00  9.59           O  
ATOM    249  N   GLU A  64      10.207  -7.690   3.388  1.00 10.04           N  
ATOM    250  CA  GLU A  64       9.190  -8.379   4.174  1.00 10.94           C  
ATOM    251  C   GLU A  64       8.544  -7.470   5.225  1.00  9.74           C  
ATOM    252  O   GLU A  64       8.075  -7.882   6.280  1.00  9.42           O  
ATOM    253  N   SER A  65       8.607  -6.118   4.914  1.00  6.85           N  
ATOM    254  CA  SER A  65       7.985  -5.138   5.705  1.00  6.90           C  
ATOM    255  C   SER A  65       6.524  -5.176   5.480  1.00  4.72           C  
ATOM    256  O   SER A  65       5.969  -5.661   4.490  1.00  3.91           O  
ATOM    257  N   THR A  66       5.778  -4.612   6.454  1.00  4.48           N  
ATOM    258  CA  THR A  66       4.344  -4.831   6.411  1.00  3.80           C  
ATOM    259  C   THR A  66       3.634  -3.534   6.392  1.00  4.60           C  
ATOM    260  O   THR A  66       3.722  -2.664   7.252  1.00  5.33           O  
ATOM    261  N   LEU A  67       2.770  -3.440   5.380  1.00  4.17           N  
ATOM    262  CA  LEU A  67       2.077  -2.273   5.012  1.00  3.85           C  
ATOM    263  C   LEU A  67       0.651  -2.448   5.647  1.00  3.80           C  
ATOM    264  O   LEU A  67       0.157  -3.585   5.695  1.00  5.54           O  
ATOM    265  N   HIS A  68      -0.040  -1.391   6.061  1.00  2.94           N  
ATOM    266  CA  HIS A  68      -1.365  -1.500   6.695  1.00  4.17           C  
ATOM    267  C   HIS A  68      -2.402  -0.983   5.775  1.00  5.32           C  
ATOM    268  O   HIS A  68      -2.377   0.187   5.382  1.00  7.70           O  
ATOM    269  N   LEU A  69      -3.364  -1.860   5.359  1.00  5.29           N  
ATOM    270  CA  LEU A  69      -4.375  -1.427   4.431  1.00  3.97           C  
ATOM    271  C   LEU A  69      -5.546  -0.932   5.214  1.00  5.07           C  
ATOM    272  O   LEU A  69      -6.027  -1.631   6.113  1.00  4.34           O  
ATOM    273  N   VAL A  70      -5.923   0.326   4.922  1.00  4.29           N  
ATOM    274  CA  VAL A  70      -6.975   1.002   5.659  1.00  6.26           C  
ATOM    275  C   VAL A  70      -8.067   1.272   4.602  1.00  9.22           C  
ATOM    276  O   VAL A  70      -7.908   1.790   3.500  1.00  9.36           O  
TER
ENDMDL
MODEL      17
ATOM      1  N   GLN A   2       9.857  -8.101  -2.366  1.00  9.27           N  
ATOM      2  CA  GLN A   2       8.611  -8.609  -1.873  1.00  9.07           C  
ATOM      3  C   GLN A   2       8.194  -7.783  -0.690  1.00  8.72           C  
ATOM      4  O   GLN A   2       9.000  -7.464   0.170  1.00  8.22           O  
ATOM      5  N   ILE A   3       6.893  -7.337  -0.584  1.00  5.87           N  
ATOM      6  CA  ILE A   3       6.354  -6.693   0.610  1.00  5.07           C  
ATOM      7  C   ILE A   3       5.103  -7.313   1.154  1.00  4.01           C  
ATOM      8  O   ILE A   3       4.290  -7.957   0.466  1.00  4.61           O  
ATOM      9  N   PHE A   4       4.852  -7.086   2.443  1.00  4.55           N  
ATOM     10  CA  PHE A   4       3.692  -7.696   3.054  1.00  4.68           C  
ATOM     11  C   PHE A   4       2.713  -6.592   3.253  1.00  5.30           C  
ATOM     12  O   PHE A   4       3.027  -5.552   3.805  1.00  5.58           O  
ATOM     13  N   VAL A   5       1.415  -6.792   2.944  1.00  4.44           N  
ATOM     14  CA  VAL A   5       0.362  -5.806   3.122  1.00  3.87           C  
ATOM     15  C   VAL A   5      -0.648  -6.508   3.871  1.00  4.93           C  
ATOM     16  O   VAL A   5      -1.035  -7.622   3.595  1.00  6.84           O  
ATOM     17  N   LYS A   6      -1.199  -5.862   4.928  1.00  6.04           N  
ATOM     18  CA  LYS A   6      -2.208  -6.393   5.787  1.00  6.12           C  
ATOM     19  C   LYS A   6      -3.552  -5.686   5.511  1.00  6.57           C  
ATOM     20  O   LYS A   6      -3.628  -4.427   5.393  1.00  5.76           O  
ATOM     21  N   THR A   7      -4.524  -6.552   5.259  1.00  7.41           N  
ATOM     22  CA  THR A   7      -5.865  -6.223   4.782  1.00  7.48           C  
ATOM     23  C   THR A   7      -6.808  -5.874   5.900  1.00  8.75           C  
ATOM     24  O   THR A   7      -6.556  -5.969   7.083  1.00  8.58           O  
ATOM     25  N   LEU A   8      -8.068  -5.454   5.539  1.00  9.84           N  
ATOM     26  CA  LEU A   8      -9.077  -5.156   6.585  1.00 14.15           C  
ATOM     27  C   LEU A   8      -9.510  -6.320   7.431  1.00 17.37           C  
ATOM     28  O   LEU A   8      -9.818  -6.118   8.622  1.00 17.01           O  
ATOM     29  N   THR A   9      -9.463  -7.554   6.948  1.00 18.33           N  
ATOM     30  CA  THR A   9      -9.705  -8.732   7.776  1.00 19.24           C  
ATOM     31  C   THR A   9      -8.383  -9.091   8.444  1.00 19.48           C  
ATOM     32  O   THR A   9      -8.421 -10.036   9.190  1.00 23.14           O  
ATOM     33  N   GLY A  10      -7.186  -8.415   8.163  1.00 19.43           N  
ATOM     34  CA  GLY A  10      -5.982  -8.692   8.834  1.00 18.74           C  
ATOM     35  C   GLY A  10      -5.285  -9.977   8.331  1.00 17.62           C  
ATOM     36  O   GLY A  10      -4.288 -10.424   8.921  1.00 19.74           O  
ATOM     37  N   LYS A  11      -5.844 -10.523   7.250  1.00 13.56           N  
ATOM     38  CA  LYS A  11      -5.113 -11.354   6.361  1.00 11.91           C  
ATOM     39  C   LYS A  11      -3.865 -10.715   5.767  1.00 10.18           C  
ATOM     40  O   LYS A  11      -3.877  -9.515   5.535  1.00  9.10           O  
ATOM     41  N   THR A  12      -2.816 -11.443   5.554  1.00  9.63           N  
ATOM     42  CA  THR A  12      -1.598 -10.866   5.006  1.00  9.85           C  
ATOM     43  C   THR A  12      -1.468 -11.252   3.526  1.00 11.66           C  
ATOM     44  O   THR A  12      -1.526 -12.401   3.184  1.00 12.33           O  
ATOM     45  N   ILE A  13      -1.119 -10.254   2.691  1.00 10.42           N  
ATOM     46  CA  ILE A  13      -0.748 -10.462   1.274  1.00 11.84           C  
ATOM     47  C   ILE A  13       0.698 -10.138   1.036  1.00 10.55           C  
ATOM     48  O   ILE A  13       1.290  -9.301   1.705  1.00 11.92           O  
ATOM     49  N   THR A  14       1.325 -10.845   0.078  1.00  9.39           N  
ATOM     50  CA  THR A  14       2.707 -10.656  -0.323  1.00  9.63           C  
ATOM     51  C   THR A  14       2.764 -10.208  -1.737  1.00 11.20           C  
ATOM     52  O   THR A  14       2.134 -10.816  -2.601  1.00 11.63           O  
ATOM     53  N   LEU A  15       3.433  -9.088  -2.030  1.00  8.29           N  
ATOM     54  CA  LEU A  15       3.374  -8.432  -3.335  1.00  9.03           C  
ATOM     55  C   LEU A  15       4.672  -8.241  -3.947  1.00  8.59           C  
ATOM     56  O   LEU A  15       5.602  -7.660  -3.367  1.00  7.79           O  
ATOM     57  N   GLU A  16       4.884  -8.572  -5.305  1.00 11.04           N  
ATOM     58  CA  GLU A  16       6.100  -8.272  -5.955  1.00 11.50           C  
ATOM     59  C   GLU A  16       6.124  -6.903  -6.508  1.00 10.13           C  
ATOM     60  O   GLU A  16       5.260  -6.513  -7.324  1.00  9.83           O  
ATOM     61  N   VAL A  17       7.010  -6.036  -6.072  1.00  8.99           N  
ATOM     62  CA  VAL A  17       7.088  -4.629  -6.373  1.00  8.85           C  
ATOM     63  C   VAL A  17       8.525  -4.275  -6.533  1.00  8.04           C  
ATOM     64  O   VAL A  17       9.467  -4.945  -6.081  1.00  8.99           O  
ATOM     65  N   GLU A  18       8.767  -3.165  -7.272  1.00  7.29           N  
ATOM     66  CA  GLU A  18      10.084  -2.549  -7.334  1.00  7.08           C  
ATOM     67  C   GLU A  18      10.181  -1.484  -6.238  1.00  6.45           C  
ATOM     68  O   GLU A  18       9.101  -0.948  -5.916  1.00  5.28           O  
ATOM     69  N   PRO A  19      11.332  -1.129  -5.650  1.00  7.24           N  
ATOM     70  CA  PRO A  19      11.435  -0.015  -4.758  1.00  7.07           C  
ATOM     71  C   PRO A  19      11.197   1.328  -5.438  1.00  6.65           C  
ATOM     72  O   PRO A  19      10.971   2.373  -4.830  1.00  6.37           O  
ATOM     73  N   SER A  20      11.257   1.381  -6.761  1.00  6.80           N  
ATOM     74  CA  SER A  20      11.118   2.553  -7.521  1.00  6.28           C  
ATOM     75  C   SER A  20       9.671   2.823  -7.956  1.00  8.45           C  
ATOM     76  O   SER A  20       9.320   3.839  -8.542  1.00  7.26           O  
ATOM     77  N   ASP A  21       8.785   1.881  -7.599  1.00  7.50           N  
ATOM     78  CA  ASP A  21       7.350   1.919  -7.811  1.00  7.70           C  
ATOM     79  C   ASP A  21       6.725   2.980  -6.885  1.00  7.08           C  
ATOM     80  O   ASP A  21       7.122   3.220  -5.791  1.00  8.11           O  
ATOM     81  N   THR A  22       5.664   3.679  -7.335  1.00  5.37           N  
ATOM     82  CA  THR A  22       4.947   4.544  -6.415  1.00  6.01           C  
ATOM     83  C   THR A  22       4.019   3.859  -5.487  1.00  8.01           C  
ATOM     84  O   THR A  22       3.597   2.762  -5.720  1.00  8.11           O  
ATOM     85  N   ILE A  23       3.514   4.587  -4.433  1.00  8.32           N  
ATOM     86  CA  ILE A  23       2.492   4.119  -3.504  1.00  9.92           C  
ATOM     87  C   ILE A  23       1.225   3.657  -4.257  1.00 10.01           C  
ATOM     88  O   ILE A  23       0.492   2.687  -3.852  1.00  8.71           O  
ATOM     89  N   GLU A  24       0.843   4.494  -5.317  1.00  9.54           N  
ATOM     90  CA  GLU A  24      -0.111   4.122  -6.316  1.00 11.81           C  
ATOM     91  C   GLU A  24       0.121   2.822  -7.189  1.00 11.14           C  
ATOM     92  O   GLU A  24      -0.782   2.024  -7.333  1.00 10.62           O  
ATOM     93  N   ASN A  25       1.322   2.569  -7.676  1.00  9.43           N  
ATOM     94  CA  ASN A  25       1.665   1.264  -8.190  1.00 10.96           C  
ATOM     95  C   ASN A  25       1.402   0.128  -7.253  1.00  9.68           C  
ATOM     96  O   ASN A  25       0.945  -0.956  -7.609  1.00  9.33           O  
ATOM     97  N   VAL A  26       1.683   0.291  -5.955  1.00  6.52           N  
ATOM     98  CA  VAL A  26       1.427  -0.698  -4.911  1.00  5.53           C  
ATOM     99  C   VAL A  26      -0.091  -0.866  -4.741  1.00  4.42           C  
ATOM    100  O   VAL A  26      -0.596  -1.992  -4.626  1.00  3.40           O  
ATOM    101  N   LYS A  27      -0.878   0.203  -4.769  1.00  2.64           N  
ATOM    102  CA  LYS A  27      -2.330   0.124  -4.578  1.00  4.14           C  
ATOM    103  C   LYS A  27      -2.995  -0.486  -5.837  1.00  5.58           C  
ATOM    104  O   LYS A  27      -4.011  -1.165  -5.855  1.00  4.11           O  
ATOM    105  N   ALA A  28      -2.326  -0.382  -7.005  1.00  6.61           N  
ATOM    106  CA  ALA A  28      -2.746  -1.178  -8.170  1.00  7.74           C  
ATOM    107  C   ALA A  28      -2.523  -2.683  -7.998  1.00  9.17           C  
ATOM    108  O   ALA A  28      -3.375  -3.516  -8.271  1.00 11.45           O  
ATOM    109  N   LYS A  29      -1.347  -3.088  -7.446  1.00  8.96           N  
ATOM    110  CA  LYS A  29      -1.109  -4.479  -7.122  1.00  7.90           C  
ATOM    111  C   LYS A  29      -2.129  -5.078  -6.121  1.00  6.92           C  
ATOM    112  O   LYS A  29      -2.485  -6.264  -6.194  1.00  6.87           O  
ATOM    113  N   ILE A  30      -2.645  -4.250  -5.133  1.00  4.57           N  
ATOM    114  CA  ILE A  30      -3.687  -4.576  -4.169  1.00  5.58           C  
ATOM    115  C   ILE A  30      -5.024  -4.715  -4.851  1.00  7.26           C  
ATOM    116  O   ILE A  30      -5.841  -5.606  -4.459  1.00  9.46           O  
ATOM    117  N   GLN A  31      -5.286  -3.931  -5.875  1.00  7.06           N  
ATOM    118  CA  GLN A  31      -6.511  -3.949  -6.662  1.00  8.67           C  
ATOM    119  C   GLN A  31      -6.670  -5.338  -7.388  1.00 10.90           C  
ATOM    120  O   GLN A  31      -7.699  -5.904  -7.528  1.00  9.63           O  
ATOM    121  N   ASP A  32      -5.554  -5.939  -7.883  1.00 10.93           N  
ATOM    122  CA  ASP A  32      -5.486  -7.221  -8.504  1.00 14.01           C  
ATOM    123  C   ASP A  32      -5.783  -8.339  -7.447  1.00 14.04           C  
ATOM    124  O   ASP A  32      -6.522  -9.254  -7.725  1.00 13.39           O  
ATOM    125  N   LYS A  33      -5.244  -8.125  -6.226  1.00 14.22           N  
ATOM    126  CA  LYS A  33      -5.414  -9.058  -5.145  1.00 14.00           C  
ATOM    127  C   LYS A  33      -6.873  -9.061  -4.694  1.00 12.37           C  
ATOM    128  O   LYS A  33      -7.591 -10.020  -4.706  1.00 12.17           O  
ATOM    129  N   GLU A  34      -7.475  -7.856  -4.360  1.00 10.11           N  
ATOM    130  CA  GLU A  34      -8.564  -7.857  -3.415  1.00 10.07           C  
ATOM    131  C   GLU A  34      -9.709  -7.145  -4.100  1.00  9.32           C  
ATOM    132  O   GLU A  34     -10.824  -7.148  -3.571  1.00 11.61           O  
ATOM    133  N   GLY A  35      -9.478  -6.468  -5.290  1.00  7.22           N  
ATOM    134  CA  GLY A  35     -10.599  -5.896  -5.991  1.00  6.29           C  
ATOM    135  C   GLY A  35     -10.922  -4.475  -5.761  1.00  6.93           C  
ATOM    136  O   GLY A  35     -11.954  -4.026  -6.290  1.00  7.41           O  
ATOM    137  N   ILE A  36     -10.137  -3.745  -4.969  1.00  5.86           N  
ATOM    138  CA  ILE A  36     -10.433  -2.405  -4.434  1.00  6.07           C  
ATOM    139  C   ILE A  36      -9.827  -1.301  -5.266  1.00  6.36           C  
ATOM    140  O   ILE A  36      -8.604  -1.403  -5.489  1.00  6.18           O  
ATOM    141  N   PRO A  37     -10.626  -0.313  -5.648  1.00  8.65           N  
ATOM    142  CA  PRO A  37     -10.081   0.876  -6.391  1.00  9.18           C  
ATOM    143  C   PRO A  37      -8.849   1.539  -5.707  1.00  9.85           C  
ATOM    144  O   PRO A  37      -8.996   1.852  -4.519  1.00  8.51           O  
ATOM    145  N   PRO A  38      -7.733   1.845  -6.339  1.00  8.71           N  
ATOM    146  CA  PRO A  38      -6.570   2.629  -5.781  1.00  9.08           C  
ATOM    147  C   PRO A  38      -6.967   3.933  -5.178  1.00  9.28           C  
ATOM    148  O   PRO A  38      -6.401   4.400  -4.187  1.00  6.50           O  
ATOM    149  N   ASP A  39      -8.010   4.548  -5.748  1.00 11.20           N  
ATOM    150  CA  ASP A  39      -8.528   5.831  -5.215  1.00 14.96           C  
ATOM    151  C   ASP A  39      -9.342   5.722  -3.910  1.00 13.99           C  
ATOM    152  O   ASP A  39      -9.295   6.664  -3.160  1.00 13.75           O  
ATOM    153  N   GLN A  40      -9.876   4.542  -3.551  1.00 11.60           N  
ATOM    154  CA  GLN A  40     -10.564   4.243  -2.286  1.00 10.76           C  
ATOM    155  C   GLN A  40      -9.606   3.682  -1.300  1.00  8.01           C  
ATOM    156  O   GLN A  40      -9.957   3.614  -0.111  1.00  8.96           O  
ATOM    157  N   GLN A  41      -8.325   3.310  -1.709  1.00  6.52           N  
ATOM    158  CA  GLN A  41      -7.311   2.819  -0.791  1.00  3.87           C  
ATOM    159  C   GLN A  41      -6.521   3.831  -0.089  1.00  4.79           C  
ATOM    160  O   GLN A  41      -5.935   4.743  -0.648  1.00  6.34           O  
ATOM    161  N   ARG A  42      -6.253   3.534   1.184  1.00  5.73           N  
ATOM    162  CA  ARG A  42      -5.386   4.227   2.026  1.00  6.97           C  
ATOM    163  C   ARG A  42      -4.371   3.250   2.539  1.00  7.15           C  
ATOM    164  O   ARG A  42      -4.710   2.153   2.879  1.00  7.33           O  
ATOM    165  N   LEU A  43      -3.084   3.681   2.610  1.00  4.65           N  
ATOM    166  CA  LEU A  43      -1.985   2.803   2.963  1.00  3.51           C  
ATOM    167  C   LEU A  43      -1.207   3.375   4.116  1.00  5.56           C  
ATOM    168  O   LEU A  43      -0.858   4.564   4.109  1.00  4.19           O  
ATOM    169  N   ILE A  44      -0.967   2.585   5.162  1.00  4.58           N  
ATOM    170  CA  ILE A  44      -0.327   2.996   6.409  1.00  5.55           C  
ATOM    171  C   ILE A  44       0.886   2.098   6.600  1.00  5.46           C  
ATOM    172  O   ILE A  44       0.768   0.968   6.378  1.00  6.04           O  
ATOM    173  N   PHE A  45       1.993   2.647   7.063  1.00  6.75           N  
ATOM    174  CA  PHE A  45       3.187   1.948   7.430  1.00  4.70           C  
ATOM    175  C   PHE A  45       3.700   2.653   8.657  1.00  6.34           C  
ATOM    176  O   PHE A  45       3.911   3.849   8.624  1.00  5.45           O  
ATOM    177  N   ALA A  46       3.929   1.918   9.808  1.00  6.53           N  
ATOM    178  CA  ALA A  46       4.485   2.409  11.055  1.00  7.15           C  
ATOM    179  C   ALA A  46       3.825   3.718  11.635  1.00  9.00           C  
ATOM    180  O   ALA A  46       4.489   4.726  11.908  1.00 11.15           O  
ATOM    181  N   GLY A  47       2.498   3.646  11.715  1.00  9.35           N  
ATOM    182  CA  GLY A  47       1.779   4.778  12.198  1.00 11.68           C  
ATOM    183  C   GLY A  47       1.606   5.866  11.179  1.00 11.14           C  
ATOM    184  O   GLY A  47       1.101   6.910  11.514  1.00 13.93           O  
ATOM    185  N   LYS A  48       2.133   5.754   9.968  1.00 10.47           N  
ATOM    186  CA  LYS A  48       2.226   6.903   9.079  1.00  8.82           C  
ATOM    187  C   LYS A  48       1.435   6.672   7.793  1.00  7.68           C  
ATOM    188  O   LYS A  48       1.598   5.643   7.149  1.00  6.47           O  
ATOM    189  N   GLN A  49       0.546   7.612   7.308  1.00  8.89           N  
ATOM    190  CA  GLN A  49      -0.253   7.433   6.132  1.00  7.18           C  
ATOM    191  C   GLN A  49       0.574   7.774   4.917  1.00  8.23           C  
ATOM    192  O   GLN A  49       1.521   8.611   4.996  1.00  9.70           O  
ATOM    193  N   LEU A  50       0.352   7.169   3.735  1.00  6.51           N  
ATOM    194  CA  LEU A  50       1.272   7.300   2.580  1.00  7.41           C  
ATOM    195  C   LEU A  50       0.693   7.931   1.371  1.00  8.27           C  
ATOM    196  O   LEU A  50      -0.334   7.513   0.851  1.00  8.34           O  
ATOM    197  N   GLU A  51       1.295   9.017   0.812  1.00  9.43           N  
ATOM    198  CA  GLU A  51       0.739   9.807  -0.325  1.00 11.90           C  
ATOM    199  C   GLU A  51       1.190   9.250  -1.636  1.00 11.49           C  
ATOM    200  O   GLU A  51       2.319   8.829  -1.854  1.00  9.88           O  
ATOM    201  N   ASP A  52       0.235   9.106  -2.541  1.00 12.71           N  
ATOM    202  CA  ASP A  52       0.169   8.297  -3.755  1.00 16.56           C  
ATOM    203  C   ASP A  52       1.314   8.343  -4.763  1.00 15.83           C  
ATOM    204  O   ASP A  52       1.871   7.310  -5.149  1.00 17.21           O  
ATOM    205  N   GLY A  53       1.768   9.543  -5.216  1.00 15.00           N  
ATOM    206  CA  GLY A  53       2.787   9.801  -6.224  1.00 11.77           C  
ATOM    207  C   GLY A  53       4.231   9.623  -5.836  1.00 11.10           C  
ATOM    208  O   GLY A  53       5.088   9.805  -6.665  1.00 11.25           O  
ATOM    209  N   ARG A  54       4.456   9.203  -4.588  1.00  8.53           N  
ATOM    210  CA  ARG A  54       5.767   8.933  -4.056  1.00  9.05           C  
ATOM    211  C   ARG A  54       6.116   7.545  -4.136  1.00  8.96           C  
ATOM    212  O   ARG A  54       5.303   6.648  -4.345  1.00 11.60           O  
ATOM    213  N   THR A  55       7.434   7.255  -3.952  1.00  9.05           N  
ATOM    214  CA  THR A  55       8.051   5.955  -4.150  1.00  9.03           C  
ATOM    215  C   THR A  55       8.431   5.286  -2.901  1.00  8.15           C  
ATOM    216  O   THR A  55       8.627   5.880  -1.838  1.00  5.91           O  
ATOM    217  N   LEU A  56       8.692   3.922  -2.983  1.00  6.91           N  
ATOM    218  CA  LEU A  56       9.082   3.126  -1.789  1.00  8.29           C  
ATOM    219  C   LEU A  56      10.423   3.447  -1.290  1.00  8.05           C  
ATOM    220  O   LEU A  56      10.640   3.481  -0.084  1.00 10.17           O  
ATOM    221  N   SER A  57      11.326   3.775  -2.187  1.00  8.92           N  
ATOM    222  CA  SER A  57      12.611   4.348  -1.844  1.00  9.00           C  
ATOM    223  C   SER A  57      12.602   5.659  -1.074  1.00  9.44           C  
ATOM    224  O   SER A  57      13.371   5.819  -0.124  1.00 10.91           O  
ATOM    225  N   ASP A  58      11.726   6.591  -1.444  1.00  9.11           N  
ATOM    226  CA  ASP A  58      11.494   7.809  -0.664  1.00  7.91           C  
ATOM    227  C   ASP A  58      11.007   7.468   0.722  1.00  9.12           C  
ATOM    228  O   ASP A  58      11.418   8.003   1.756  1.00  8.61           O  
ATOM    229  N   TYR A  59      10.023   6.561   0.873  1.00  7.97           N  
ATOM    230  CA  TYR A  59       9.291   6.336   2.142  1.00  8.45           C  
ATOM    231  C   TYR A  59       9.858   5.216   2.997  1.00 10.98           C  
ATOM    232  O   TYR A  59       9.345   4.751   3.979  1.00 12.95           O  
ATOM    233  N   ASN A  60      10.978   4.647   2.609  1.00 12.38           N  
ATOM    234  CA  ASN A  60      11.809   3.663   3.303  1.00 13.94           C  
ATOM    235  C   ASN A  60      11.146   2.356   3.436  1.00 14.16           C  
ATOM    236  O   ASN A  60      11.205   1.720   4.442  1.00 14.26           O  
ATOM    237  N   ILE A  61      10.464   1.956   2.369  1.00 11.08           N  
ATOM    238  CA  ILE A  61       9.665   0.682   2.402  1.00 11.78           C  
ATOM    239  C   ILE A  61      10.592  -0.346   1.776  1.00 13.74           C  
ATOM    240  O   ILE A  61      11.050  -0.139   0.660  1.00 14.60           O  
ATOM    241  N   GLN A  62      10.948  -1.346   2.554  1.00 13.97           N  
ATOM    242  CA  GLN A  62      11.993  -2.332   2.357  1.00 15.52           C  
ATOM    243  C   GLN A  62      11.407  -3.669   1.975  1.00 13.94           C  
ATOM    244  O   GLN A  62      10.202  -3.911   2.063  1.00 12.15           O  
ATOM    245  N   LYS A  63      12.218  -4.637   1.593  1.00 11.73           N  
ATOM    246  CA  LYS A  63      11.873  -6.009   1.446  1.00 11.97           C  
ATOM    247  C   LYS A  63      11.427  -6.703   2.706  1.00 10.41           C  
ATOM    248  O   LYS A  63      12.067  -6.647   3.754  1.00  9.59           O  
ATOM    249  N   GLU A  64      10.272  -7.393   2.563  1.00 10.04           N  
ATOM    250  CA  GLU A  64       9.565  -8.012   3.721  1.00 10.94           C  
ATOM    251  C   GLU A  64       8.910  -6.994   4.662  1.00  9.74           C  
ATOM    252  O   GLU A  64       8.567  -7.285   5.757  1.00  9.42           O  
ATOM    253  N   SER A  65       8.703  -5.712   4.259  1.00  6.85           N  
ATOM    254  CA  SER A  65       8.131  -4.723   5.104  1.00  6.90           C  
ATOM    255  C   SER A  65       6.603  -4.681   5.038  1.00  4.72           C  
ATOM    256  O   SER A  65       5.977  -5.067   4.062  1.00  3.91           O  
ATOM    257  N   THR A  66       5.999  -4.302   6.145  1.00  4.48           N  
ATOM    258  CA  THR A  66       4.586  -4.466   6.348  1.00  3.80           C  
ATOM    259  C   THR A  66       3.853  -3.242   6.286  1.00  4.60           C  
ATOM    260  O   THR A  66       3.999  -2.392   7.105  1.00  5.33           O  
ATOM    261  N   LEU A  67       2.945  -3.158   5.244  1.00  4.17           N  
ATOM    262  CA  LEU A  67       1.970  -2.051   5.130  1.00  3.85           C  
ATOM    263  C   LEU A  67       0.615  -2.442   5.623  1.00  3.80           C  
ATOM    264  O   LEU A  67       0.230  -3.595   5.699  1.00  5.54           O  
ATOM    265  N   HIS A  68      -0.234  -1.422   6.012  1.00  2.94           N  
ATOM    266  CA  HIS A  68      -1.647  -1.678   6.394  1.00  4.17           C  
ATOM    267  C   HIS A  68      -2.514  -0.986   5.428  1.00  5.32           C  
ATOM    268  O   HIS A  68      -2.124   0.071   4.923  1.00  7.70           O  
ATOM    269  N   LEU A  69      -3.643  -1.564   5.060  1.00  5.29           N  
ATOM    270  CA  LEU A  69      -4.480  -1.191   3.951  1.00  3.97           C  
ATOM    271  C   LEU A  69      -5.864  -0.912   4.527  1.00  5.07           C  
ATOM    272  O   LEU A  69      -6.517  -1.662   5.244  1.00  4.34           O  
ATOM    273  N   VAL A  70      -6.362   0.306   4.247  1.00  4.29           N  
ATOM    274  CA  VAL A  70      -7.640   0.860   4.756  1.00  6.26           C  
ATOM    275  C   VAL A  70      -8.309   1.642   3.670  1.00  9.22           C  
ATOM    276  O   VAL A  70      -7.968   1.734   2.503  1.00  9.36           O  
TER
ENDMDL
MODEL      18
ATOM      1  N   GLN A   2       9.889  -8.859  -2.030  1.00  9.27           N  
ATOM      2  CA  GLN A   2       8.627  -9.360  -1.486  1.00  9.07           C  
ATOM      3  C   GLN A   2       8.316  -8.448  -0.357  1.00  8.72           C  
ATOM      4  O   GLN A   2       9.219  -8.101   0.445  1.00  8.22           O  
ATOM      5  N   ILE A   3       7.025  -8.043  -0.188  1.00  5.87           N  
ATOM      6  CA  ILE A   3       6.537  -7.220   0.908  1.00  5.07           C  
ATOM      7  C   ILE A   3       5.218  -7.783   1.303  1.00  4.01           C  
ATOM      8  O   ILE A   3       4.593  -8.506   0.556  1.00  4.61           O  
ATOM      9  N   PHE A   4       4.719  -7.402   2.508  1.00  4.55           N  
ATOM     10  CA  PHE A   4       3.493  -7.920   3.047  1.00  4.68           C  
ATOM     11  C   PHE A   4       2.603  -6.726   3.213  1.00  5.30           C  
ATOM     12  O   PHE A   4       3.020  -5.674   3.665  1.00  5.58           O  
ATOM     13  N   VAL A   5       1.287  -6.840   2.905  1.00  4.44           N  
ATOM     14  CA  VAL A   5       0.280  -5.758   3.158  1.00  3.87           C  
ATOM     15  C   VAL A   5      -0.801  -6.367   4.020  1.00  4.93           C  
ATOM     16  O   VAL A   5      -1.319  -7.403   3.665  1.00  6.84           O  
ATOM     17  N   LYS A   6      -1.174  -5.734   5.132  1.00  6.04           N  
ATOM     18  CA  LYS A   6      -2.177  -6.340   5.988  1.00  6.12           C  
ATOM     19  C   LYS A   6      -3.377  -5.395   6.351  1.00  6.57           C  
ATOM     20  O   LYS A   6      -3.166  -4.160   6.478  1.00  5.76           O  
ATOM     21  N   THR A   7      -4.607  -5.900   6.509  1.00  7.41           N  
ATOM     22  CA  THR A   7      -5.885  -5.170   6.435  1.00  7.48           C  
ATOM     23  C   THR A   7      -6.514  -5.185   7.838  1.00  8.75           C  
ATOM     24  O   THR A   7      -5.996  -5.795   8.779  1.00  8.58           O  
ATOM     25  N   LEU A   8      -7.628  -4.456   8.091  1.00  9.84           N  
ATOM     26  CA  LEU A   8      -8.317  -4.417   9.411  1.00 14.15           C  
ATOM     27  C   LEU A   8      -9.011  -5.706   9.843  1.00 17.37           C  
ATOM     28  O   LEU A   8      -9.293  -5.968  11.000  1.00 17.01           O  
ATOM     29  N   THR A   9      -9.296  -6.571   8.825  1.00 18.33           N  
ATOM     30  CA  THR A   9      -9.910  -7.871   9.015  1.00 19.24           C  
ATOM     31  C   THR A   9      -8.889  -8.986   9.123  1.00 19.48           C  
ATOM     32  O   THR A   9      -9.260 -10.149   9.242  1.00 23.14           O  
ATOM     33  N   GLY A  10      -7.597  -8.588   9.187  1.00 19.43           N  
ATOM     34  CA  GLY A  10      -6.498  -9.438   9.522  1.00 18.74           C  
ATOM     35  C   GLY A  10      -5.856 -10.289   8.523  1.00 17.62           C  
ATOM     36  O   GLY A  10      -4.869 -10.973   8.830  1.00 19.74           O  
ATOM     37  N   LYS A  11      -6.302 -10.385   7.302  1.00 13.56           N  
ATOM     38  CA  LYS A  11      -5.667 -11.021   6.110  1.00 11.91           C  
ATOM     39  C   LYS A  11      -4.331 -10.366   5.681  1.00 10.18           C  
ATOM     40  O   LYS A  11      -3.944  -9.254   6.030  1.00  9.10           O  
ATOM     41  N   THR A  12      -3.450 -11.109   4.982  1.00  9.63           N  
ATOM     42  CA  THR A  12      -2.110 -10.743   4.547  1.00  9.85           C  
ATOM     43  C   THR A  12      -2.102 -10.886   3.047  1.00 11.66           C  
ATOM     44  O   THR A  12      -2.467 -11.883   2.430  1.00 12.33           O  
ATOM     45  N   ILE A  13      -1.751  -9.777   2.340  1.00 10.42           N  
ATOM     46  CA  ILE A  13      -1.614  -9.857   0.886  1.00 11.84           C  
ATOM     47  C   ILE A  13      -0.101  -9.740   0.641  1.00 10.55           C  
ATOM     48  O   ILE A  13       0.535  -8.832   1.166  1.00 11.92           O  
ATOM     49  N   THR A  14       0.521 -10.674  -0.117  1.00  9.39           N  
ATOM     50  CA  THR A  14       1.985 -10.689  -0.361  1.00  9.63           C  
ATOM     51  C   THR A  14       2.211 -10.181  -1.808  1.00 11.20           C  
ATOM     52  O   THR A  14       1.728 -10.748  -2.783  1.00 11.63           O  
ATOM     53  N   LEU A  15       2.932  -9.072  -1.960  1.00  8.29           N  
ATOM     54  CA  LEU A  15       3.180  -8.443  -3.247  1.00  9.03           C  
ATOM     55  C   LEU A  15       4.675  -8.436  -3.498  1.00  8.59           C  
ATOM     56  O   LEU A  15       5.489  -8.314  -2.606  1.00  7.79           O  
ATOM     57  N   GLU A  16       5.010  -8.385  -4.768  1.00 11.04           N  
ATOM     58  CA  GLU A  16       6.341  -8.248  -5.273  1.00 11.50           C  
ATOM     59  C   GLU A  16       6.560  -6.865  -5.894  1.00 10.13           C  
ATOM     60  O   GLU A  16       5.695  -6.450  -6.669  1.00  9.83           O  
ATOM     61  N   VAL A  17       7.564  -6.113  -5.471  1.00  8.99           N  
ATOM     62  CA  VAL A  17       7.636  -4.661  -5.781  1.00  8.85           C  
ATOM     63  C   VAL A  17       9.107  -4.268  -5.962  1.00  8.04           C  
ATOM     64  O   VAL A  17      10.027  -5.030  -5.558  1.00  8.99           O  
ATOM     65  N   GLU A  18       9.421  -3.126  -6.559  1.00  7.29           N  
ATOM     66  CA  GLU A  18      10.696  -2.507  -6.607  1.00  7.08           C  
ATOM     67  C   GLU A  18      10.718  -1.374  -5.597  1.00  6.45           C  
ATOM     68  O   GLU A  18       9.626  -0.944  -5.218  1.00  5.28           O  
ATOM     69  N   PRO A  19      11.765  -0.824  -5.069  1.00  7.24           N  
ATOM     70  CA  PRO A  19      11.761   0.376  -4.224  1.00  7.07           C  
ATOM     71  C   PRO A  19      11.234   1.682  -4.818  1.00  6.65           C  
ATOM     72  O   PRO A  19      10.787   2.570  -4.145  1.00  6.37           O  
ATOM     73  N   SER A  20      11.431   1.742  -6.156  1.00  6.80           N  
ATOM     74  CA  SER A  20      10.908   2.775  -7.111  1.00  6.28           C  
ATOM     75  C   SER A  20       9.354   2.775  -7.293  1.00  8.45           C  
ATOM     76  O   SER A  20       8.842   3.850  -7.672  1.00  7.26           O  
ATOM     77  N   ASP A  21       8.619   1.641  -7.073  1.00  7.50           N  
ATOM     78  CA  ASP A  21       7.190   1.652  -7.071  1.00  7.70           C  
ATOM     79  C   ASP A  21       6.494   2.696  -6.172  1.00  7.08           C  
ATOM     80  O   ASP A  21       6.805   2.840  -5.025  1.00  8.11           O  
ATOM     81  N   THR A  22       5.475   3.335  -6.716  1.00  5.37           N  
ATOM     82  CA  THR A  22       4.769   4.298  -5.976  1.00  6.01           C  
ATOM     83  C   THR A  22       3.700   3.605  -5.178  1.00  8.01           C  
ATOM     84  O   THR A  22       3.443   2.444  -5.399  1.00  8.11           O  
ATOM     85  N   ILE A  23       3.157   4.295  -4.240  1.00  8.32           N  
ATOM     86  CA  ILE A  23       2.070   3.837  -3.404  1.00  9.92           C  
ATOM     87  C   ILE A  23       0.796   3.566  -4.227  1.00 10.01           C  
ATOM     88  O   ILE A  23       0.148   2.516  -4.063  1.00  8.71           O  
ATOM     89  N   GLU A  24       0.505   4.361  -5.262  1.00  9.54           N  
ATOM     90  CA  GLU A  24      -0.519   4.224  -6.302  1.00 11.81           C  
ATOM     91  C   GLU A  24      -0.371   2.983  -7.174  1.00 11.14           C  
ATOM     92  O   GLU A  24      -1.321   2.339  -7.578  1.00 10.62           O  
ATOM     93  N   ASN A  25       0.888   2.635  -7.518  1.00  9.43           N  
ATOM     94  CA  ASN A  25       1.180   1.340  -8.111  1.00 10.96           C  
ATOM     95  C   ASN A  25       0.950   0.180  -7.153  1.00  9.68           C  
ATOM     96  O   ASN A  25       0.339  -0.825  -7.522  1.00  9.33           O  
ATOM     97  N   VAL A  26       1.412   0.258  -5.858  1.00  6.52           N  
ATOM     98  CA  VAL A  26       1.110  -0.737  -4.794  1.00  5.53           C  
ATOM     99  C   VAL A  26      -0.387  -1.076  -4.625  1.00  4.42           C  
ATOM    100  O   VAL A  26      -0.862  -2.192  -4.540  1.00  3.40           O  
ATOM    101  N   LYS A  27      -1.195  -0.014  -4.632  1.00  2.64           N  
ATOM    102  CA  LYS A  27      -2.633  -0.196  -4.687  1.00  4.14           C  
ATOM    103  C   LYS A  27      -3.144  -0.852  -5.960  1.00  5.58           C  
ATOM    104  O   LYS A  27      -4.162  -1.497  -5.920  1.00  4.11           O  
ATOM    105  N   ALA A  28      -2.458  -0.745  -7.133  1.00  6.61           N  
ATOM    106  CA  ALA A  28      -2.978  -1.306  -8.334  1.00  7.74           C  
ATOM    107  C   ALA A  28      -2.688  -2.760  -8.367  1.00  9.17           C  
ATOM    108  O   ALA A  28      -3.497  -3.601  -8.667  1.00 11.45           O  
ATOM    109  N   LYS A  29      -1.498  -3.107  -7.850  1.00  8.96           N  
ATOM    110  CA  LYS A  29      -1.299  -4.522  -7.502  1.00  7.90           C  
ATOM    111  C   LYS A  29      -2.347  -5.224  -6.619  1.00  6.92           C  
ATOM    112  O   LYS A  29      -2.815  -6.356  -6.901  1.00  6.87           O  
ATOM    113  N   ILE A  30      -2.804  -4.533  -5.536  1.00  4.57           N  
ATOM    114  CA  ILE A  30      -3.917  -4.966  -4.773  1.00  5.58           C  
ATOM    115  C   ILE A  30      -5.241  -5.012  -5.476  1.00  7.26           C  
ATOM    116  O   ILE A  30      -5.989  -5.948  -5.264  1.00  9.46           O  
ATOM    117  N   GLN A  31      -5.467  -4.144  -6.434  1.00  7.06           N  
ATOM    118  CA  GLN A  31      -6.596  -4.091  -7.318  1.00  8.67           C  
ATOM    119  C   GLN A  31      -6.631  -5.300  -8.263  1.00 10.90           C  
ATOM    120  O   GLN A  31      -7.651  -5.937  -8.486  1.00  9.63           O  
ATOM    121  N   ASP A  32      -5.506  -5.632  -8.835  1.00 10.93           N  
ATOM    122  CA  ASP A  32      -5.223  -6.777  -9.706  1.00 14.01           C  
ATOM    123  C   ASP A  32      -5.516  -8.106  -9.007  1.00 14.04           C  
ATOM    124  O   ASP A  32      -6.069  -9.036  -9.640  1.00 13.39           O  
ATOM    125  N   LYS A  33      -5.179  -8.268  -7.676  1.00 14.22           N  
ATOM    126  CA  LYS A  33      -5.425  -9.481  -6.875  1.00 14.00           C  
ATOM    127  C   LYS A  33      -6.795  -9.505  -6.276  1.00 12.37           C  
ATOM    128  O   LYS A  33      -7.403 -10.541  -6.404  1.00 12.17           O  
ATOM    129  N   GLU A  34      -7.228  -8.431  -5.595  1.00 10.11           N  
ATOM    130  CA  GLU A  34      -8.382  -8.552  -4.720  1.00 10.07           C  
ATOM    131  C   GLU A  34      -9.592  -7.778  -5.219  1.00  9.32           C  
ATOM    132  O   GLU A  34     -10.674  -7.873  -4.614  1.00 11.61           O  
ATOM    133  N   GLY A  35      -9.419  -7.035  -6.315  1.00  7.22           N  
ATOM    134  CA  GLY A  35     -10.412  -6.229  -6.958  1.00  6.29           C  
ATOM    135  C   GLY A  35     -10.819  -4.928  -6.258  1.00  6.93           C  
ATOM    136  O   GLY A  35     -11.939  -4.421  -6.454  1.00  7.41           O  
ATOM    137  N   ILE A  36      -9.905  -4.243  -5.491  1.00  5.86           N  
ATOM    138  CA  ILE A  36     -10.270  -3.089  -4.730  1.00  6.07           C  
ATOM    139  C   ILE A  36      -9.836  -1.852  -5.478  1.00  6.36           C  
ATOM    140  O   ILE A  36      -8.647  -1.607  -5.561  1.00  6.18           O  
ATOM    141  N   PRO A  37     -10.651  -1.002  -6.010  1.00  8.65           N  
ATOM    142  CA  PRO A  37     -10.210   0.215  -6.645  1.00  9.18           C  
ATOM    143  C   PRO A  37      -9.133   1.098  -5.904  1.00  9.85           C  
ATOM    144  O   PRO A  37      -9.342   1.284  -4.687  1.00  8.51           O  
ATOM    145  N   PRO A  38      -8.114   1.790  -6.434  1.00  8.71           N  
ATOM    146  CA  PRO A  38      -7.129   2.558  -5.598  1.00  9.08           C  
ATOM    147  C   PRO A  38      -7.873   3.783  -4.964  1.00  9.28           C  
ATOM    148  O   PRO A  38      -7.333   4.174  -3.925  1.00  6.50           O  
ATOM    149  N   ASP A  39      -9.021   4.322  -5.470  1.00 11.20           N  
ATOM    150  CA  ASP A  39      -9.908   5.339  -4.945  1.00 14.96           C  
ATOM    151  C   ASP A  39     -10.426   4.961  -3.579  1.00 13.99           C  
ATOM    152  O   ASP A  39     -10.847   5.788  -2.779  1.00 13.75           O  
ATOM    153  N   GLN A  40     -10.369   3.676  -3.182  1.00 11.60           N  
ATOM    154  CA  GLN A  40     -10.799   3.111  -1.930  1.00 10.76           C  
ATOM    155  C   GLN A  40      -9.690   2.737  -0.910  1.00  8.01           C  
ATOM    156  O   GLN A  40     -10.002   2.201   0.177  1.00  8.96           O  
ATOM    157  N   GLN A  41      -8.404   3.013  -1.251  1.00  6.52           N  
ATOM    158  CA  GLN A  41      -7.225   2.548  -0.525  1.00  3.87           C  
ATOM    159  C   GLN A  41      -6.295   3.668  -0.059  1.00  4.79           C  
ATOM    160  O   GLN A  41      -5.732   4.408  -0.897  1.00  6.34           O  
ATOM    161  N   ARG A  42      -6.142   3.781   1.289  1.00  5.73           N  
ATOM    162  CA  ARG A  42      -5.166   4.478   2.047  1.00  6.97           C  
ATOM    163  C   ARG A  42      -4.183   3.586   2.759  1.00  7.15           C  
ATOM    164  O   ARG A  42      -4.576   2.523   3.144  1.00  7.33           O  
ATOM    165  N   LEU A  43      -2.932   4.024   2.967  1.00  4.65           N  
ATOM    166  CA  LEU A  43      -1.867   3.221   3.429  1.00  3.51           C  
ATOM    167  C   LEU A  43      -1.086   3.977   4.540  1.00  5.56           C  
ATOM    168  O   LEU A  43      -0.775   5.173   4.399  1.00  4.19           O  
ATOM    169  N   ILE A  44      -0.796   3.200   5.609  1.00  4.58           N  
ATOM    170  CA  ILE A  44      -0.035   3.720   6.799  1.00  5.55           C  
ATOM    171  C   ILE A  44       1.235   2.947   6.982  1.00  5.46           C  
ATOM    172  O   ILE A  44       1.230   1.745   6.867  1.00  6.04           O  
ATOM    173  N   PHE A  45       2.375   3.610   7.251  1.00  6.75           N  
ATOM    174  CA  PHE A  45       3.603   2.955   7.691  1.00  4.70           C  
ATOM    175  C   PHE A  45       4.519   3.871   8.554  1.00  6.34           C  
ATOM    176  O   PHE A  45       4.761   5.028   8.218  1.00  5.45           O  
ATOM    177  N   ALA A  46       5.037   3.404   9.692  1.00  6.53           N  
ATOM    178  CA  ALA A  46       6.027   4.132  10.558  1.00  7.15           C  
ATOM    179  C   ALA A  46       5.444   5.267  11.389  1.00  9.00           C  
ATOM    180  O   ALA A  46       6.017   6.332  11.626  1.00 11.15           O  
ATOM    181  N   GLY A  47       4.139   5.095  11.659  1.00  9.35           N  
ATOM    182  CA  GLY A  47       3.184   5.951  12.359  1.00 11.68           C  
ATOM    183  C   GLY A  47       2.645   7.013  11.440  1.00 11.14           C  
ATOM    184  O   GLY A  47       1.769   7.755  11.846  1.00 13.93           O  
ATOM    185  N   LYS A  48       3.062   6.962  10.162  1.00 10.47           N  
ATOM    186  CA  LYS A  48       2.814   7.918   9.134  1.00  8.82           C  
ATOM    187  C   LYS A  48       1.968   7.446   7.985  1.00  7.68           C  
ATOM    188  O   LYS A  48       2.216   6.372   7.377  1.00  6.47           O  
ATOM    189  N   GLN A  49       0.921   8.205   7.639  1.00  8.89           N  
ATOM    190  CA  GLN A  49       0.146   8.015   6.364  1.00  7.18           C  
ATOM    191  C   GLN A  49       0.777   8.357   5.037  1.00  8.23           C  
ATOM    192  O   GLN A  49       1.313   9.445   4.799  1.00  9.70           O  
ATOM    193  N   LEU A  50       0.755   7.380   4.092  1.00  6.51           N  
ATOM    194  CA  LEU A  50       1.572   7.440   2.865  1.00  7.41           C  
ATOM    195  C   LEU A  50       0.882   8.186   1.770  1.00  8.27           C  
ATOM    196  O   LEU A  50      -0.289   8.079   1.544  1.00  8.34           O  
ATOM    197  N   GLU A  51       1.637   8.990   0.973  1.00  9.43           N  
ATOM    198  CA  GLU A  51       1.086   9.782  -0.074  1.00 11.90           C  
ATOM    199  C   GLU A  51       1.302   9.190  -1.411  1.00 11.49           C  
ATOM    200  O   GLU A  51       2.371   8.709  -1.788  1.00  9.88           O  
ATOM    201  N   ASP A  52       0.269   9.169  -2.203  1.00 12.71           N  
ATOM    202  CA  ASP A  52       0.117   8.275  -3.342  1.00 16.56           C  
ATOM    203  C   ASP A  52       1.107   8.186  -4.473  1.00 15.83           C  
ATOM    204  O   ASP A  52       1.501   7.151  -5.033  1.00 17.21           O  
ATOM    205  N   GLY A  53       1.618   9.381  -4.819  1.00 15.00           N  
ATOM    206  CA  GLY A  53       2.635   9.557  -5.859  1.00 11.77           C  
ATOM    207  C   GLY A  53       4.110   9.415  -5.339  1.00 11.10           C  
ATOM    208  O   GLY A  53       5.068   9.754  -5.971  1.00 11.25           O  
ATOM    209  N   ARG A  54       4.302   9.082  -4.038  1.00  8.53           N  
ATOM    210  CA  ARG A  54       5.659   8.924  -3.476  1.00  9.05           C  
ATOM    211  C   ARG A  54       6.042   7.479  -3.654  1.00  8.96           C  
ATOM    212  O   ARG A  54       5.203   6.642  -3.954  1.00 11.60           O  
ATOM    213  N   THR A  55       7.327   7.146  -3.556  1.00  9.05           N  
ATOM    214  CA  THR A  55       7.801   5.776  -3.729  1.00  9.03           C  
ATOM    215  C   THR A  55       8.037   5.063  -2.388  1.00  8.15           C  
ATOM    216  O   THR A  55       8.280   5.701  -1.359  1.00  5.91           O  
ATOM    217  N   LEU A  56       8.083   3.693  -2.362  1.00  6.91           N  
ATOM    218  CA  LEU A  56       8.505   2.922  -1.180  1.00  8.29           C  
ATOM    219  C   LEU A  56       9.871   3.288  -0.654  1.00  8.05           C  
ATOM    220  O   LEU A  56      10.157   3.268   0.530  1.00 10.17           O  
ATOM    221  N   SER A  57      10.839   3.602  -1.553  1.00  8.92           N  
ATOM    222  CA  SER A  57      12.184   4.040  -1.247  1.00  9.00           C  
ATOM    223  C   SER A  57      12.205   5.387  -0.454  1.00  9.44           C  
ATOM    224  O   SER A  57      12.966   5.552   0.477  1.00 10.91           O  
ATOM    225  N   ASP A  58      11.183   6.304  -0.585  1.00  9.11           N  
ATOM    226  CA  ASP A  58      11.032   7.617  -0.009  1.00  7.91           C  
ATOM    227  C   ASP A  58      10.514   7.524   1.484  1.00  9.12           C  
ATOM    228  O   ASP A  58      10.553   8.493   2.226  1.00  8.61           O  
ATOM    229  N   TYR A  59      10.057   6.311   1.884  1.00  7.97           N  
ATOM    230  CA  TYR A  59       9.591   6.080   3.215  1.00  8.45           C  
ATOM    231  C   TYR A  59      10.571   5.124   3.905  1.00 10.98           C  
ATOM    232  O   TYR A  59      10.282   4.609   5.034  1.00 12.95           O  
ATOM    233  N   ASN A  60      11.678   4.828   3.202  1.00 12.38           N  
ATOM    234  CA  ASN A  60      12.759   3.998   3.622  1.00 13.94           C  
ATOM    235  C   ASN A  60      12.375   2.528   3.790  1.00 14.16           C  
ATOM    236  O   ASN A  60      12.796   1.901   4.725  1.00 14.26           O  
ATOM    237  N   ILE A  61      11.523   1.936   2.940  1.00 11.08           N  
ATOM    238  CA  ILE A  61      11.043   0.601   3.113  1.00 11.78           C  
ATOM    239  C   ILE A  61      11.965  -0.361   2.311  1.00 13.74           C  
ATOM    240  O   ILE A  61      12.425  -0.029   1.219  1.00 14.60           O
[truncated: 13,924,451 more chars]
