# Supplementary material for: ENCORE: Software for Quantitative Ensemble Comparison
Source: PLoS Comput Biol. 2015 Oct 27;11(10):e1004415. doi: 10.1371/journal.pcbi.1004415 (PMC4624683; doi:10.1371/journal.pcbi.1004415)
Supplement: S1 Software — (GZ) [file pcbi.1004415.s001.gz › encore-master/examples/experimental_ubq_ensembles/filtered_2LJ5.pdb]

MODEL      1
ATOM      1  N   GLN A   2      22.867  15.745  38.713  1.00  0.00           N  
ATOM      2  CA  GLN A   2      21.874  16.259  37.791  1.00  0.00           C  
ATOM      3  C   GLN A   2      21.935  17.744  37.463  1.00  0.00           C  
ATOM      4  O   GLN A   2      21.968  18.528  38.409  1.00  0.00           O  
ATOM      5  N   ILE A   3      22.003  18.164  36.198  1.00  0.00           N  
ATOM      6  CA  ILE A   3      21.563  19.388  35.559  1.00  0.00           C  
ATOM      7  C   ILE A   3      20.441  19.197  34.549  1.00  0.00           C  
ATOM      8  O   ILE A   3      20.319  18.169  33.887  1.00  0.00           O  
ATOM      9  N   PHE A   4      19.626  20.230  34.322  1.00  0.00           N  
ATOM     10  CA  PHE A   4      18.746  20.169  33.172  1.00  0.00           C  
ATOM     11  C   PHE A   4      18.991  21.266  32.145  1.00  0.00           C  
ATOM     12  O   PHE A   4      19.445  22.333  32.551  1.00  0.00           O  
ATOM     13  N   VAL A   5      18.815  20.994  30.850  1.00  0.00           N  
ATOM     14  CA  VAL A   5      18.764  22.031  29.839  1.00  0.00           C  
ATOM     15  C   VAL A   5      17.361  22.113  29.254  1.00  0.00           C  
ATOM     16  O   VAL A   5      16.882  21.145  28.667  1.00  0.00           O  
ATOM     17  N   LYS A   6      16.710  23.278  29.227  1.00  0.00           N  
ATOM     18  CA  LYS A   6      15.472  23.632  28.562  1.00  0.00           C  
ATOM     19  C   LYS A   6      15.788  24.498  27.351  1.00  0.00           C  
ATOM     20  O   LYS A   6      16.620  25.403  27.362  1.00  0.00           O  
ATOM     21  N   THR A   7      14.898  24.252  26.386  1.00  0.00           N  
ATOM     22  CA  THR A   7      15.024  24.921  25.107  1.00  0.00           C  
ATOM     23  C   THR A   7      14.319  26.267  25.020  1.00  0.00           C  
ATOM     24  O   THR A   7      13.383  26.530  25.772  1.00  0.00           O  
ATOM     25  N   LEU A   8      14.637  26.805  23.840  1.00  0.00           N  
ATOM     26  CA  LEU A   8      14.093  28.084  23.430  1.00  0.00           C  
ATOM     27  C   LEU A   8      12.688  28.021  22.849  1.00  0.00           C  
ATOM     28  O   LEU A   8      11.923  28.917  23.199  1.00  0.00           O  
ATOM     29  N   THR A   9      12.367  26.908  22.185  1.00  0.00           N  
ATOM     30  CA  THR A   9      11.047  26.548  21.710  1.00  0.00           C  
ATOM     31  C   THR A   9      10.016  25.852  22.587  1.00  0.00           C  
ATOM     32  O   THR A   9       8.926  25.656  22.054  1.00  0.00           O  
ATOM     33  N   GLY A  10      10.348  25.446  23.814  1.00  0.00           N  
ATOM     34  CA  GLY A  10       9.606  24.365  24.431  1.00  0.00           C  
ATOM     35  C   GLY A  10      10.278  23.554  25.529  1.00  0.00           C  
ATOM     36  O   GLY A  10      10.755  24.060  26.543  1.00  0.00           O  
ATOM     37  N   LYS A  11      10.204  22.233  25.350  1.00  0.00           N  
ATOM     38  CA  LYS A  11      10.824  21.125  26.048  1.00  0.00           C  
ATOM     39  C   LYS A  11      12.130  21.171  26.828  1.00  0.00           C  
ATOM     40  O   LYS A  11      12.960  22.064  26.675  1.00  0.00           O  
ATOM     41  N   THR A  12      12.293  20.172  27.698  1.00  0.00           N  
ATOM     42  CA  THR A  12      13.436  20.017  28.575  1.00  0.00           C  
ATOM     43  C   THR A  12      14.225  18.770  28.200  1.00  0.00           C  
ATOM     44  O   THR A  12      13.622  17.789  27.770  1.00  0.00           O  
ATOM     45  N   ILE A  13      15.531  18.863  28.458  1.00  0.00           N  
ATOM     46  CA  ILE A  13      16.500  17.802  28.275  1.00  0.00           C  
ATOM     47  C   ILE A  13      17.208  17.424  29.568  1.00  0.00           C  
ATOM     48  O   ILE A  13      17.579  18.262  30.386  1.00  0.00           O  
ATOM     49  N   THR A  14      17.328  16.116  29.808  1.00  0.00           N  
ATOM     50  CA  THR A  14      17.842  15.575  31.050  1.00  0.00           C  
ATOM     51  C   THR A  14      19.281  15.102  30.895  1.00  0.00           C  
ATOM     52  O   THR A  14      19.597  14.405  29.933  1.00  0.00           O  
ATOM     53  N   LEU A  15      20.059  15.531  31.891  1.00  0.00           N  
ATOM     54  CA  LEU A  15      21.506  15.454  31.894  1.00  0.00           C  
ATOM     55  C   LEU A  15      22.058  14.943  33.218  1.00  0.00           C  
ATOM     56  O   LEU A  15      21.737  15.523  34.253  1.00  0.00           O  
ATOM     57  N   GLU A  16      22.966  13.967  33.153  1.00  0.00           N  
ATOM     58  CA  GLU A  16      23.846  13.603  34.245  1.00  0.00           C  
ATOM     59  C   GLU A  16      25.189  14.208  33.863  1.00  0.00           C  
ATOM     60  O   GLU A  16      25.758  13.909  32.816  1.00  0.00           O  
ATOM     61  N   VAL A  17      25.652  15.142  34.698  1.00  0.00           N  
ATOM     62  CA  VAL A  17      27.030  15.585  34.743  1.00  0.00           C  
ATOM     63  C   VAL A  17      27.959  15.276  35.908  1.00  0.00           C  
ATOM     64  O   VAL A  17      27.547  14.595  36.845  1.00  0.00           O  
ATOM     65  N   GLU A  18      29.208  15.747  35.947  1.00  0.00           N  
ATOM     66  CA  GLU A  18      29.983  15.969  37.151  1.00  0.00           C  
ATOM     67  C   GLU A  18      30.326  17.425  37.433  1.00  0.00           C  
ATOM     68  O   GLU A  18      30.360  18.206  36.485  1.00  0.00           O  
ATOM     69  N   PRO A  19      30.483  17.846  38.690  1.00  0.00           N  
ATOM     70  CA  PRO A  19      30.835  19.217  38.996  1.00  0.00           C  
ATOM     71  C   PRO A  19      32.040  19.727  38.216  1.00  0.00           C  
ATOM     72  O   PRO A  19      32.042  20.928  37.955  1.00  0.00           O  
ATOM     73  N   SER A  20      32.987  18.827  37.943  1.00  0.00           N  
ATOM     74  CA  SER A  20      34.141  19.077  37.102  1.00  0.00           C  
ATOM     75  C   SER A  20      34.040  19.006  35.585  1.00  0.00           C  
ATOM     76  O   SER A  20      35.037  19.231  34.902  1.00  0.00           O  
ATOM     77  N   ASP A  21      32.849  18.860  35.001  1.00  0.00           N  
ATOM     78  CA  ASP A  21      32.629  18.876  33.569  1.00  0.00           C  
ATOM     79  C   ASP A  21      32.828  20.306  33.088  1.00  0.00           C  
ATOM     80  O   ASP A  21      32.408  21.278  33.713  1.00  0.00           O  
ATOM     81  N   THR A  22      33.480  20.475  31.935  1.00  0.00           N  
ATOM     82  CA  THR A  22      33.689  21.748  31.276  1.00  0.00           C  
ATOM     83  C   THR A  22      32.473  22.140  30.449  1.00  0.00           C  
ATOM     84  O   THR A  22      31.670  21.266  30.133  1.00  0.00           O  
ATOM     85  N   ILE A  23      32.312  23.404  30.049  1.00  0.00           N  
ATOM     86  CA  ILE A  23      31.099  23.782  29.353  1.00  0.00           C  
ATOM     87  C   ILE A  23      31.081  23.165  27.962  1.00  0.00           C  
ATOM     88  O   ILE A  23      30.033  22.677  27.545  1.00  0.00           O  
ATOM     89  N   GLU A  24      32.233  22.876  27.352  1.00  0.00           N  
ATOM     90  CA  GLU A  24      32.250  22.032  26.174  1.00  0.00           C  
ATOM     91  C   GLU A  24      31.661  20.648  26.405  1.00  0.00           C  
ATOM     92  O   GLU A  24      30.889  20.163  25.580  1.00  0.00           O  
ATOM     93  N   ASN A  25      31.905  20.001  27.547  1.00  0.00           N  
ATOM     94  CA  ASN A  25      31.350  18.717  27.924  1.00  0.00           C  
ATOM     95  C   ASN A  25      29.836  18.870  27.871  1.00  0.00           C  
ATOM     96  O   ASN A  25      29.225  17.976  27.291  1.00  0.00           O  
ATOM     97  N   VAL A  26      29.155  19.876  28.424  1.00  0.00           N  
ATOM     98  CA  VAL A  26      27.710  19.902  28.310  1.00  0.00           C  
ATOM     99  C   VAL A  26      27.247  19.869  26.861  1.00  0.00           C  
ATOM    100  O   VAL A  26      26.438  19.051  26.428  1.00  0.00           O  
ATOM    101  N   LYS A  27      27.840  20.719  26.019  1.00  0.00           N  
ATOM    102  CA  LYS A  27      27.430  20.812  24.633  1.00  0.00           C  
ATOM    103  C   LYS A  27      27.753  19.537  23.867  1.00  0.00           C  
ATOM    104  O   LYS A  27      26.873  19.177  23.089  1.00  0.00           O  
ATOM    105  N   ALA A  28      28.876  18.844  24.071  1.00  0.00           N  
ATOM    106  CA  ALA A  28      29.061  17.543  23.460  1.00  0.00           C  
ATOM    107  C   ALA A  28      28.073  16.503  23.968  1.00  0.00           C  
ATOM    108  O   ALA A  28      27.574  15.811  23.083  1.00  0.00           O  
ATOM    109  N   LYS A  29      27.755  16.356  25.256  1.00  0.00           N  
ATOM    110  CA  LYS A  29      26.661  15.538  25.739  1.00  0.00           C  
ATOM    111  C   LYS A  29      25.381  15.820  24.965  1.00  0.00           C  
ATOM    112  O   LYS A  29      24.673  14.960  24.446  1.00  0.00           O  
ATOM    113  N   ILE A  30      24.940  17.079  24.935  1.00  0.00           N  
ATOM    114  CA  ILE A  30      23.771  17.588  24.246  1.00  0.00           C  
ATOM    115  C   ILE A  30      23.802  17.304  22.751  1.00  0.00           C  
ATOM    116  O   ILE A  30      22.763  17.049  22.147  1.00  0.00           O  
ATOM    117  N   GLN A  31      24.976  17.373  22.120  1.00  0.00           N  
ATOM    118  CA  GLN A  31      25.217  16.971  20.749  1.00  0.00           C  
ATOM    119  C   GLN A  31      25.055  15.483  20.473  1.00  0.00           C  
ATOM    120  O   GLN A  31      24.576  15.225  19.371  1.00  0.00           O  
ATOM    121  N   ASP A  32      25.290  14.564  21.413  1.00  0.00           N  
ATOM    122  CA  ASP A  32      24.660  13.259  21.408  1.00  0.00           C  
ATOM    123  C   ASP A  32      23.144  13.305  21.531  1.00  0.00           C  
ATOM    124  O   ASP A  32      22.416  12.581  20.855  1.00  0.00           O  
ATOM    125  N   LYS A  33      22.592  14.098  22.453  1.00  0.00           N  
ATOM    126  CA  LYS A  33      21.212  13.783  22.761  1.00  0.00           C  
ATOM    127  C   LYS A  33      20.181  14.174  21.712  1.00  0.00           C  
ATOM    128  O   LYS A  33      19.301  13.437  21.272  1.00  0.00           O  
ATOM    129  N   GLU A  34      20.502  15.287  21.048  1.00  0.00           N  
ATOM    130  CA  GLU A  34      19.700  15.793  19.952  1.00  0.00           C  
ATOM    131  C   GLU A  34      20.295  16.387  18.683  1.00  0.00           C  
ATOM    132  O   GLU A  34      19.650  17.027  17.856  1.00  0.00           O  
ATOM    133  N   GLY A  35      21.610  16.256  18.491  1.00  0.00           N  
ATOM    134  CA  GLY A  35      22.345  16.484  17.264  1.00  0.00           C  
ATOM    135  C   GLY A  35      22.593  17.955  16.961  1.00  0.00           C  
ATOM    136  O   GLY A  35      22.699  18.315  15.791  1.00  0.00           O  
ATOM    137  N   ILE A  36      22.621  18.853  17.949  1.00  0.00           N  
ATOM    138  CA  ILE A  36      22.928  20.267  17.880  1.00  0.00           C  
ATOM    139  C   ILE A  36      24.407  20.564  18.081  1.00  0.00           C  
ATOM    140  O   ILE A  36      24.919  20.292  19.165  1.00  0.00           O  
ATOM    141  N   PRO A  37      25.183  21.070  17.119  1.00  0.00           N  
ATOM    142  CA  PRO A  37      26.622  21.242  17.144  1.00  0.00           C  
ATOM    143  C   PRO A  37      26.961  22.329  18.154  1.00  0.00           C  
ATOM    144  O   PRO A  37      26.251  23.320  18.315  1.00  0.00           O  
ATOM    145  N   PRO A  38      28.100  22.177  18.833  1.00  0.00           N  
ATOM    146  CA  PRO A  38      28.497  23.172  19.809  1.00  0.00           C  
ATOM    147  C   PRO A  38      28.735  24.571  19.258  1.00  0.00           C  
ATOM    148  O   PRO A  38      28.191  25.482  19.878  1.00  0.00           O  
ATOM    149  N   ASP A  39      29.080  24.728  17.978  1.00  0.00           N  
ATOM    150  CA  ASP A  39      28.944  25.901  17.138  1.00  0.00           C  
ATOM    151  C   ASP A  39      27.568  26.469  16.822  1.00  0.00           C  
ATOM    152  O   ASP A  39      27.414  27.586  16.333  1.00  0.00           O  
ATOM    153  N   GLN A  40      26.416  25.810  16.969  1.00  0.00           N  
ATOM    154  CA  GLN A  40      25.100  26.410  17.054  1.00  0.00           C  
ATOM    155  C   GLN A  40      24.726  26.967  18.420  1.00  0.00           C  
ATOM    156  O   GLN A  40      23.891  27.866  18.489  1.00  0.00           O  
ATOM    157  N   GLN A  41      25.183  26.427  19.552  1.00  0.00           N  
ATOM    158  CA  GLN A  41      24.722  26.541  20.921  1.00  0.00           C  
ATOM    159  C   GLN A  41      25.271  27.733  21.694  1.00  0.00           C  
ATOM    160  O   GLN A  41      26.476  27.974  21.699  1.00  0.00           O  
ATOM    161  N   ARG A  42      24.466  28.579  22.340  1.00  0.00           N  
ATOM    162  CA  ARG A  42      24.929  29.352  23.475  1.00  0.00           C  
ATOM    163  C   ARG A  42      24.146  28.834  24.673  1.00  0.00           C  
ATOM    164  O   ARG A  42      22.918  28.807  24.652  1.00  0.00           O  
ATOM    165  N   LEU A  43      24.800  28.738  25.832  1.00  0.00           N  
ATOM    166  CA  LEU A  43      24.133  28.506  27.097  1.00  0.00           C  
ATOM    167  C   LEU A  43      24.154  29.756  27.966  1.00  0.00           C  
ATOM    168  O   LEU A  43      25.142  30.484  27.906  1.00  0.00           O  
ATOM    169  N   ILE A  44      23.035  29.939  28.670  1.00  0.00           N  
ATOM    170  CA  ILE A  44      22.798  31.029  29.595  1.00  0.00           C  
ATOM    171  C   ILE A  44      22.218  30.519  30.907  1.00  0.00           C  
ATOM    172  O   ILE A  44      21.521  29.507  30.953  1.00  0.00           O  
ATOM    173  N   PHE A  45      22.658  31.172  31.984  1.00  0.00           N  
ATOM    174  CA  PHE A  45      22.118  31.164  33.329  1.00  0.00           C  
ATOM    175  C   PHE A  45      22.351  32.496  34.027  1.00  0.00           C  
ATOM    176  O   PHE A  45      23.409  33.035  33.712  1.00  0.00           O  
ATOM    177  N   ALA A  46      21.432  33.002  34.854  1.00  0.00           N  
ATOM    178  CA  ALA A  46      21.725  34.226  35.573  1.00  0.00           C  
ATOM    179  C   ALA A  46      22.234  35.371  34.710  1.00  0.00           C  
ATOM    180  O   ALA A  46      23.201  36.030  35.086  1.00  0.00           O  
ATOM    181  N   GLY A  47      21.622  35.587  33.543  1.00  0.00           N  
ATOM    182  CA  GLY A  47      21.893  36.779  32.765  1.00  0.00           C  
ATOM    183  C   GLY A  47      23.296  36.769  32.175  1.00  0.00           C  
ATOM    184  O   GLY A  47      23.668  37.692  31.454  1.00  0.00           O  
ATOM    185  N   LYS A  48      24.136  35.742  32.315  1.00  0.00           N  
ATOM    186  CA  LYS A  48      25.374  35.470  31.613  1.00  0.00           C  
ATOM    187  C   LYS A  48      25.543  34.293  30.663  1.00  0.00           C  
ATOM    188  O   LYS A  48      25.020  33.191  30.811  1.00  0.00           O  
ATOM    189  N   GLN A  49      26.310  34.465  29.584  1.00  0.00           N  
ATOM    190  CA  GLN A  49      26.630  33.385  28.673  1.00  0.00           C  
ATOM    191  C   GLN A  49      27.771  32.613  29.322  1.00  0.00           C  
ATOM    192  O   GLN A  49      28.600  33.055  30.114  1.00  0.00           O  
ATOM    193  N   LEU A  50      27.715  31.293  29.133  1.00  0.00           N  
ATOM    194  CA  LEU A  50      28.599  30.288  29.688  1.00  0.00           C  
ATOM    195  C   LEU A  50      29.682  30.032  28.650  1.00  0.00           C  
ATOM    196  O   LEU A  50      29.393  29.303  27.703  1.00  0.00           O  
ATOM    197  N   GLU A  51      30.921  30.502  28.810  1.00  0.00           N  
ATOM    198  CA  GLU A  51      31.968  30.233  27.845  1.00  0.00           C  
ATOM    199  C   GLU A  51      32.566  28.842  27.994  1.00  0.00           C  
ATOM    200  O   GLU A  51      32.515  28.251  29.070  1.00  0.00           O  
ATOM    201  N   ASP A  52      33.002  28.305  26.852  1.00  0.00           N  
ATOM    202  CA  ASP A  52      33.158  26.869  26.738  1.00  0.00           C  
ATOM    203  C   ASP A  52      34.289  26.219  27.522  1.00  0.00           C  
ATOM    204  O   ASP A  52      34.268  25.007  27.723  1.00  0.00           O  
ATOM    205  N   GLY A  53      35.326  26.915  27.993  1.00  0.00           N  
ATOM    206  CA  GLY A  53      36.430  26.412  28.786  1.00  0.00           C  
ATOM    207  C   GLY A  53      36.353  26.417  30.306  1.00  0.00           C  
ATOM    208  O   GLY A  53      37.279  25.976  30.983  1.00  0.00           O  
ATOM    209  N   ARG A  54      35.179  26.751  30.846  1.00  0.00           N  
ATOM    210  CA  ARG A  54      34.943  26.751  32.276  1.00  0.00           C  
ATOM    211  C   ARG A  54      34.018  25.634  32.737  1.00  0.00           C  
ATOM    212  O   ARG A  54      33.362  24.960  31.946  1.00  0.00           O  
ATOM    213  N   THR A  55      34.084  25.321  34.033  1.00  0.00           N  
ATOM    214  CA  THR A  55      33.357  24.285  34.739  1.00  0.00           C  
ATOM    215  C   THR A  55      32.028  24.771  35.300  1.00  0.00           C  
ATOM    216  O   THR A  55      31.744  25.866  35.782  1.00  0.00           O  
ATOM    217  N   LEU A  56      31.207  23.739  35.505  1.00  0.00           N  
ATOM    218  CA  LEU A  56      30.007  23.867  36.306  1.00  0.00           C  
ATOM    219  C   LEU A  56      30.372  24.513  37.635  1.00  0.00           C  
ATOM    220  O   LEU A  56      29.523  25.334  37.976  1.00  0.00           O  
ATOM    221  N   SER A  57      31.417  24.182  38.397  1.00  0.00           N  
ATOM    222  CA  SER A  57      31.859  24.980  39.523  1.00  0.00           C  
ATOM    223  C   SER A  57      32.067  26.457  39.222  1.00  0.00           C  
ATOM    224  O   SER A  57      31.448  27.266  39.909  1.00  0.00           O  
ATOM    225  N   ASP A  58      32.741  26.936  38.173  1.00  0.00           N  
ATOM    226  CA  ASP A  58      33.154  28.319  38.046  1.00  0.00           C  
ATOM    227  C   ASP A  58      31.961  29.262  37.987  1.00  0.00           C  
ATOM    228  O   ASP A  58      31.975  30.379  38.500  1.00  0.00           O  
ATOM    229  N   TYR A  59      30.935  28.819  37.257  1.00  0.00           N  
ATOM    230  CA  TYR A  59      29.705  29.546  37.018  1.00  0.00           C  
ATOM    231  C   TYR A  59      28.662  29.349  38.109  1.00  0.00           C  
ATOM    232  O   TYR A  59      27.547  29.828  37.915  1.00  0.00           O  
ATOM    233  N   ASN A  60      29.003  28.733  39.243  1.00  0.00           N  
ATOM    234  CA  ASN A  60      28.284  28.426  40.463  1.00  0.00           C  
ATOM    235  C   ASN A  60      27.008  27.656  40.152  1.00  0.00           C  
ATOM    236  O   ASN A  60      25.918  28.033  40.577  1.00  0.00           O  
ATOM    237  N   ILE A  61      27.116  26.465  39.560  1.00  0.00           N  
ATOM    238  CA  ILE A  61      25.938  25.671  39.271  1.00  0.00           C  
ATOM    239  C   ILE A  61      25.854  24.683  40.426  1.00  0.00           C  
ATOM    240  O   ILE A  61      26.593  23.712  40.577  1.00  0.00           O  
ATOM    241  N   GLN A  62      24.791  24.836  41.219  1.00  0.00           N  
ATOM    242  CA  GLN A  62      24.183  23.830  42.066  1.00  0.00           C  
ATOM    243  C   GLN A  62      23.374  22.815  41.271  1.00  0.00           C  
ATOM    244  O   GLN A  62      22.691  23.184  40.319  1.00  0.00           O  
ATOM    245  N   LYS A  63      23.411  21.634  41.892  1.00  0.00           N  
ATOM    246  CA  LYS A  63      22.483  20.573  41.554  1.00  0.00           C  
ATOM    247  C   LYS A  63      21.043  20.929  41.214  1.00  0.00           C  
ATOM    248  O   LYS A  63      20.387  21.707  41.903  1.00  0.00           O  
ATOM    249  N   GLU A  64      20.527  20.362  40.120  1.00  0.00           N  
ATOM    250  CA  GLU A  64      19.224  20.536  39.511  1.00  0.00           C  
ATOM    251  C   GLU A  64      18.858  21.917  38.986  1.00  0.00           C  
ATOM    252  O   GLU A  64      17.735  22.093  38.519  1.00  0.00           O  
ATOM    253  N   SER A  65      19.872  22.748  38.735  1.00  0.00           N  
ATOM    254  CA  SER A  65      19.666  24.003  38.041  1.00  0.00           C  
ATOM    255  C   SER A  65      19.127  23.898  36.621  1.00  0.00           C  
ATOM    256  O   SER A  65      19.751  23.172  35.850  1.00  0.00           O  
ATOM    257  N   THR A  66      17.872  24.189  36.271  1.00  0.00           N  
ATOM    258  CA  THR A  66      17.479  24.243  34.877  1.00  0.00           C  
ATOM    259  C   THR A  66      18.070  25.394  34.076  1.00  0.00           C  
ATOM    260  O   THR A  66      17.911  26.555  34.447  1.00  0.00           O  
ATOM    261  N   LEU A  67      18.629  25.027  32.920  1.00  0.00           N  
ATOM    262  CA  LEU A  67      19.413  25.965  32.143  1.00  0.00           C  
ATOM    263  C   LEU A  67      18.759  26.277  30.804  1.00  0.00           C  
ATOM    264  O   LEU A  67      18.081  25.486  30.152  1.00  0.00           O  
ATOM    265  N   HIS A  68      19.005  27.476  30.271  1.00  0.00           N  
ATOM    266  CA  HIS A  68      18.453  28.046  29.059  1.00  0.00           C  
ATOM    267  C   HIS A  68      19.389  27.883  27.870  1.00  0.00           C  
ATOM    268  O   HIS A  68      20.352  28.635  27.740  1.00  0.00           O  
ATOM    269  N   LEU A  69      19.308  26.857  27.020  1.00  0.00           N  
ATOM    270  CA  LEU A  69      20.122  26.708  25.831  1.00  0.00           C  
ATOM    271  C   LEU A  69      19.496  27.598  24.766  1.00  0.00           C  
ATOM    272  O   LEU A  69      18.375  27.389  24.308  1.00  0.00           O  
ATOM    273  N   VAL A  70      20.251  28.582  24.274  1.00  0.00           N  
ATOM    274  CA  VAL A  70      19.958  29.498  23.190  1.00  0.00           C  
ATOM    275  C   VAL A  70      20.696  29.148  21.906  1.00  0.00           C  
ATOM    276  O   VAL A  70      21.514  28.231  21.907  1.00  0.00           O  
TER
ENDMDL
MODEL      2
ATOM      1  N   GLN A   2      21.897  15.617  38.126  1.00  0.00           N  
ATOM      2  CA  GLN A   2      21.020  16.089  37.074  1.00  0.00           C  
ATOM      3  C   GLN A   2      20.965  17.607  36.972  1.00  0.00           C  
ATOM      4  O   GLN A   2      20.589  18.096  38.035  1.00  0.00           O  
ATOM      5  N   ILE A   3      21.307  18.208  35.831  1.00  0.00           N  
ATOM      6  CA  ILE A   3      20.808  19.504  35.418  1.00  0.00           C  
ATOM      7  C   ILE A   3      19.745  19.461  34.330  1.00  0.00           C  
ATOM      8  O   ILE A   3      19.582  18.458  33.639  1.00  0.00           O  
ATOM      9  N   PHE A   4      18.942  20.525  34.246  1.00  0.00           N  
ATOM     10  CA  PHE A   4      17.901  20.452  33.240  1.00  0.00           C  
ATOM     11  C   PHE A   4      18.065  21.552  32.200  1.00  0.00           C  
ATOM     12  O   PHE A   4      17.757  22.705  32.494  1.00  0.00           O  
ATOM     13  N   VAL A   5      18.368  21.200  30.949  1.00  0.00           N  
ATOM     14  CA  VAL A   5      18.510  22.241  29.951  1.00  0.00           C  
ATOM     15  C   VAL A   5      17.161  22.523  29.306  1.00  0.00           C  
ATOM     16  O   VAL A   5      16.487  21.602  28.851  1.00  0.00           O  
ATOM     17  N   LYS A   6      16.670  23.764  29.319  1.00  0.00           N  
ATOM     18  CA  LYS A   6      15.478  24.242  28.648  1.00  0.00           C  
ATOM     19  C   LYS A   6      15.792  24.853  27.290  1.00  0.00           C  
ATOM     20  O   LYS A   6      16.695  25.683  27.215  1.00  0.00           O  
ATOM     21  N   THR A   7      15.080  24.304  26.303  1.00  0.00           N  
ATOM     22  CA  THR A   7      15.267  24.956  25.023  1.00  0.00           C  
ATOM     23  C   THR A   7      14.477  26.235  24.789  1.00  0.00           C  
ATOM     24  O   THR A   7      13.697  26.604  25.664  1.00  0.00           O  
ATOM     25  N   LEU A   8      14.657  26.881  23.635  1.00  0.00           N  
ATOM     26  CA  LEU A   8      13.851  28.042  23.320  1.00  0.00           C  
ATOM     27  C   LEU A   8      12.410  27.611  23.088  1.00  0.00           C  
ATOM     28  O   LEU A   8      11.497  28.434  23.083  1.00  0.00           O  
ATOM     29  N   THR A   9      12.139  26.353  22.732  1.00  0.00           N  
ATOM     30  CA  THR A   9      10.892  25.860  22.182  1.00  0.00           C  
ATOM     31  C   THR A   9       9.957  25.376  23.280  1.00  0.00           C  
ATOM     32  O   THR A   9       8.836  24.977  22.971  1.00  0.00           O  
ATOM     33  N   GLY A  10      10.323  25.305  24.562  1.00  0.00           N  
ATOM     34  CA  GLY A  10       9.558  24.883  25.717  1.00  0.00           C  
ATOM     35  C   GLY A  10       9.902  23.444  26.075  1.00  0.00           C  
ATOM     36  O   GLY A  10       9.382  22.970  27.082  1.00  0.00           O  
ATOM     37  N   LYS A  11      10.812  22.692  25.452  1.00  0.00           N  
ATOM     38  CA  LYS A  11      11.205  21.310  25.638  1.00  0.00           C  
ATOM     39  C   LYS A  11      12.039  21.323  26.911  1.00  0.00           C  
ATOM     40  O   LYS A  11      12.768  22.273  27.186  1.00  0.00           O  
ATOM     41  N   THR A  12      12.047  20.273  27.735  1.00  0.00           N  
ATOM     42  CA  THR A  12      13.115  19.937  28.655  1.00  0.00           C  
ATOM     43  C   THR A  12      13.996  18.855  28.050  1.00  0.00           C  
ATOM     44  O   THR A  12      13.510  17.904  27.441  1.00  0.00           O  
ATOM     45  N   ILE A  13      15.311  18.999  28.229  1.00  0.00           N  
ATOM     46  CA  ILE A  13      16.367  18.079  27.860  1.00  0.00           C  
ATOM     47  C   ILE A  13      17.062  17.807  29.187  1.00  0.00           C  
ATOM     48  O   ILE A  13      17.112  18.747  29.977  1.00  0.00           O  
ATOM     49  N   THR A  14      17.598  16.601  29.388  1.00  0.00           N  
ATOM     50  CA  THR A  14      18.137  16.319  30.703  1.00  0.00           C  
ATOM     51  C   THR A  14      19.523  15.725  30.499  1.00  0.00           C  
ATOM     52  O   THR A  14      19.706  14.840  29.665  1.00  0.00           O  
ATOM     53  N   LEU A  15      20.534  16.270  31.180  1.00  0.00           N  
ATOM     54  CA  LEU A  15      21.950  15.976  31.267  1.00  0.00           C  
ATOM     55  C   LEU A  15      22.431  15.309  32.548  1.00  0.00           C  
ATOM     56  O   LEU A  15      22.026  15.569  33.679  1.00  0.00           O  
ATOM     57  N   GLU A  16      23.381  14.375  32.463  1.00  0.00           N  
ATOM     58  CA  GLU A  16      24.205  13.796  33.504  1.00  0.00           C  
ATOM     59  C   GLU A  16      25.520  14.564  33.474  1.00  0.00           C  
ATOM     60  O   GLU A  16      26.454  14.337  32.709  1.00  0.00           O  
ATOM     61  N   VAL A  17      25.601  15.653  34.243  1.00  0.00           N  
ATOM     62  CA  VAL A  17      26.858  16.356  34.405  1.00  0.00           C  
ATOM     63  C   VAL A  17      27.425  16.207  35.809  1.00  0.00           C  
ATOM     64  O   VAL A  17      26.691  15.659  36.627  1.00  0.00           O  
ATOM     65  N   GLU A  18      28.711  16.493  36.031  1.00  0.00           N  
ATOM     66  CA  GLU A  18      29.276  16.434  37.364  1.00  0.00           C  
ATOM     67  C   GLU A  18      30.094  17.714  37.471  1.00  0.00           C  
ATOM     68  O   GLU A  18      30.257  18.359  36.438  1.00  0.00           O  
ATOM     69  N   PRO A  19      30.375  18.227  38.671  1.00  0.00           N  
ATOM     70  CA  PRO A  19      30.750  19.618  38.835  1.00  0.00           C  
ATOM     71  C   PRO A  19      32.013  20.046  38.104  1.00  0.00           C  
ATOM     72  O   PRO A  19      32.154  21.175  37.635  1.00  0.00           O  
ATOM     73  N   SER A  20      32.980  19.144  37.922  1.00  0.00           N  
ATOM     74  CA  SER A  20      34.192  19.255  37.136  1.00  0.00           C  
ATOM     75  C   SER A  20      34.147  19.250  35.615  1.00  0.00           C  
ATOM     76  O   SER A  20      35.161  19.352  34.930  1.00  0.00           O  
ATOM     77  N   ASP A  21      32.982  18.988  35.016  1.00  0.00           N  
ATOM     78  CA  ASP A  21      32.767  19.016  33.583  1.00  0.00           C  
ATOM     79  C   ASP A  21      33.006  20.458  33.158  1.00  0.00           C  
ATOM     80  O   ASP A  21      32.451  21.450  33.624  1.00  0.00           O  
ATOM     81  N   THR A  22      33.630  20.590  31.985  1.00  0.00           N  
ATOM     82  CA  THR A  22      33.856  21.855  31.313  1.00  0.00           C  
ATOM     83  C   THR A  22      32.688  22.346  30.472  1.00  0.00           C  
ATOM     84  O   THR A  22      31.891  21.521  30.031  1.00  0.00           O  
ATOM     85  N   ILE A  23      32.444  23.631  30.205  1.00  0.00           N  
ATOM     86  CA  ILE A  23      31.368  24.050  29.328  1.00  0.00           C  
ATOM     87  C   ILE A  23      31.323  23.352  27.976  1.00  0.00           C  
ATOM     88  O   ILE A  23      30.253  22.864  27.620  1.00  0.00           O  
ATOM     89  N   GLU A  24      32.471  23.023  27.380  1.00  0.00           N  
ATOM     90  CA  GLU A  24      32.517  22.174  26.206  1.00  0.00           C  
ATOM     91  C   GLU A  24      31.982  20.768  26.443  1.00  0.00           C  
ATOM     92  O   GLU A  24      31.217  20.296  25.606  1.00  0.00           O  
ATOM     93  N   ASN A  25      32.190  20.106  27.583  1.00  0.00           N  
ATOM     94  CA  ASN A  25      31.703  18.816  28.030  1.00  0.00           C  
ATOM     95  C   ASN A  25      30.181  18.839  28.061  1.00  0.00           C  
ATOM     96  O   ASN A  25      29.520  17.831  27.823  1.00  0.00           O  
ATOM     97  N   VAL A  26      29.547  19.912  28.539  1.00  0.00           N  
ATOM     98  CA  VAL A  26      28.107  20.072  28.550  1.00  0.00           C  
ATOM     99  C   VAL A  26      27.578  20.075  27.123  1.00  0.00           C  
ATOM    100  O   VAL A  26      26.708  19.239  26.889  1.00  0.00           O  
ATOM    101  N   LYS A  27      28.069  20.914  26.208  1.00  0.00           N  
ATOM    102  CA  LYS A  27      27.604  21.007  24.839  1.00  0.00           C  
ATOM    103  C   LYS A  27      27.802  19.705  24.076  1.00  0.00           C  
ATOM    104  O   LYS A  27      26.853  19.396  23.360  1.00  0.00           O  
ATOM    105  N   ALA A  28      28.938  19.025  24.251  1.00  0.00           N  
ATOM    106  CA  ALA A  28      29.043  17.750  23.571  1.00  0.00           C  
ATOM    107  C   ALA A  28      27.993  16.746  24.025  1.00  0.00           C  
ATOM    108  O   ALA A  28      27.550  15.966  23.185  1.00  0.00           O  
ATOM    109  N   LYS A  29      27.621  16.690  25.306  1.00  0.00           N  
ATOM    110  CA  LYS A  29      26.479  15.913  25.746  1.00  0.00           C  
ATOM    111  C   LYS A  29      25.053  16.295  25.375  1.00  0.00           C  
ATOM    112  O   LYS A  29      24.209  15.424  25.177  1.00  0.00           O  
ATOM    113  N   ILE A  30      24.768  17.599  25.370  1.00  0.00           N  
ATOM    114  CA  ILE A  30      23.649  18.096  24.596  1.00  0.00           C  
ATOM    115  C   ILE A  30      23.656  17.548  23.175  1.00  0.00           C  
ATOM    116  O   ILE A  30      22.602  17.171  22.665  1.00  0.00           O  
ATOM    117  N   GLN A  31      24.789  17.511  22.472  1.00  0.00           N  
ATOM    118  CA  GLN A  31      24.865  16.952  21.137  1.00  0.00           C  
ATOM    119  C   GLN A  31      24.632  15.450  21.073  1.00  0.00           C  
ATOM    120  O   GLN A  31      24.060  15.036  20.068  1.00  0.00           O  
ATOM    121  N   ASP A  32      24.969  14.689  22.118  1.00  0.00           N  
ATOM    122  CA  ASP A  32      24.729  13.262  22.181  1.00  0.00           C  
ATOM    123  C   ASP A  32      23.234  12.987  22.241  1.00  0.00           C  
ATOM    124  O   ASP A  32      22.686  12.164  21.511  1.00  0.00           O  
ATOM    125  N   LYS A  33      22.459  13.716  23.047  1.00  0.00           N  
ATOM    126  CA  LYS A  33      21.016  13.607  23.128  1.00  0.00           C  
ATOM    127  C   LYS A  33      20.282  14.026  21.864  1.00  0.00           C  
ATOM    128  O   LYS A  33      19.345  13.332  21.473  1.00  0.00           O  
ATOM    129  N   GLU A  34      20.492  15.238  21.342  1.00  0.00           N  
ATOM    130  CA  GLU A  34      19.694  16.092  20.485  1.00  0.00           C  
ATOM    131  C   GLU A  34      20.225  16.245  19.067  1.00  0.00           C  
ATOM    132  O   GLU A  34      19.442  16.552  18.171  1.00  0.00           O  
ATOM    133  N   GLY A  35      21.540  16.085  18.898  1.00  0.00           N  
ATOM    134  CA  GLY A  35      22.314  16.370  17.707  1.00  0.00           C  
ATOM    135  C   GLY A  35      22.365  17.822  17.251  1.00  0.00           C  
ATOM    136  O   GLY A  35      22.462  18.086  16.055  1.00  0.00           O  
ATOM    137  N   ILE A  36      22.429  18.745  18.213  1.00  0.00           N  
ATOM    138  CA  ILE A  36      22.702  20.147  17.970  1.00  0.00           C  
ATOM    139  C   ILE A  36      24.210  20.354  18.010  1.00  0.00           C  
ATOM    140  O   ILE A  36      24.742  20.199  19.107  1.00  0.00           O  
ATOM    141  N   PRO A  37      24.882  20.916  17.004  1.00  0.00           N  
ATOM    142  CA  PRO A  37      26.315  21.130  17.024  1.00  0.00           C  
ATOM    143  C   PRO A  37      26.878  22.101  18.052  1.00  0.00           C  
ATOM    144  O   PRO A  37      26.225  23.104  18.334  1.00  0.00           O  
ATOM    145  N   PRO A  38      28.052  21.914  18.658  1.00  0.00           N  
ATOM    146  CA  PRO A  38      28.588  22.741  19.720  1.00  0.00           C  
ATOM    147  C   PRO A  38      28.605  24.211  19.321  1.00  0.00           C  
ATOM    148  O   PRO A  38      28.128  25.022  20.113  1.00  0.00           O  
ATOM    149  N   ASP A  39      29.104  24.488  18.115  1.00  0.00           N  
ATOM    150  CA  ASP A  39      28.989  25.745  17.405  1.00  0.00           C  
ATOM    151  C   ASP A  39      27.628  26.415  17.524  1.00  0.00           C  
ATOM    152  O   ASP A  39      27.532  27.606  17.808  1.00  0.00           O  
ATOM    153  N   GLN A  40      26.522  25.705  17.287  1.00  0.00           N  
ATOM    154  CA  GLN A  40      25.148  26.118  17.088  1.00  0.00           C  
ATOM    155  C   GLN A  40      24.501  26.424  18.431  1.00  0.00           C  
ATOM    156  O   GLN A  40      23.395  26.955  18.513  1.00  0.00           O  
ATOM    157  N   GLN A  41      25.142  25.997  19.521  1.00  0.00           N  
ATOM    158  CA  GLN A  41      24.738  26.153  20.903  1.00  0.00           C  
ATOM    159  C   GLN A  41      25.224  27.380  21.660  1.00  0.00           C  
ATOM    160  O   GLN A  41      26.421  27.604  21.834  1.00  0.00           O  
ATOM    161  N   ARG A  42      24.297  28.062  22.335  1.00  0.00           N  
ATOM    162  CA  ARG A  42      24.562  29.173  23.227  1.00  0.00           C  
ATOM    163  C   ARG A  42      24.040  28.915  24.633  1.00  0.00           C  
ATOM    164  O   ARG A  42      22.811  28.890  24.640  1.00  0.00           O  
ATOM    165  N   LEU A  43      24.833  28.735  25.692  1.00  0.00           N  
ATOM    166  CA  LEU A  43      24.319  28.317  26.980  1.00  0.00           C  
ATOM    167  C   LEU A  43      24.298  29.595  27.807  1.00  0.00           C  
ATOM    168  O   LEU A  43      25.299  30.302  27.893  1.00  0.00           O  
ATOM    169  N   ILE A  44      23.135  29.938  28.365  1.00  0.00           N  
ATOM    170  CA  ILE A  44      22.781  30.979  29.308  1.00  0.00           C  
ATOM    171  C   ILE A  44      22.182  30.530  30.633  1.00  0.00           C  
ATOM    172  O   ILE A  44      21.273  29.704  30.595  1.00  0.00           O  
ATOM    173  N   PHE A  45      22.659  31.053  31.766  1.00  0.00           N  
ATOM    174  CA  PHE A  45      22.246  30.758  33.122  1.00  0.00           C  
ATOM    175  C   PHE A  45      22.217  32.057  33.916  1.00  0.00           C  
ATOM    176  O   PHE A  45      23.179  32.808  33.772  1.00  0.00           O  
ATOM    177  N   ALA A  46      21.233  32.363  34.764  1.00  0.00           N  
ATOM    178  CA  ALA A  46      21.211  33.538  35.612  1.00  0.00           C  
ATOM    179  C   ALA A  46      21.630  34.786  34.849  1.00  0.00           C  
ATOM    180  O   ALA A  46      22.083  35.795  35.385  1.00  0.00           O  
ATOM    181  N   GLY A  47      21.394  34.776  33.535  1.00  0.00           N  
ATOM    182  CA  GLY A  47      21.557  35.969  32.727  1.00  0.00           C  
ATOM    183  C   GLY A  47      22.965  36.235  32.215  1.00  0.00           C  
ATOM    184  O   GLY A  47      23.256  37.371  31.847  1.00  0.00           O  
ATOM    185  N   LYS A  48      23.790  35.186  32.245  1.00  0.00           N  
ATOM    186  CA  LYS A  48      25.175  35.194  31.817  1.00  0.00           C  
ATOM    187  C   LYS A  48      25.277  34.087  30.777  1.00  0.00           C  
ATOM    188  O   LYS A  48      24.558  33.090  30.791  1.00  0.00           O  
ATOM    189  N   GLN A  49      26.093  34.239  29.732  1.00  0.00           N  
ATOM    190  CA  GLN A  49      26.464  33.122  28.888  1.00  0.00           C  
ATOM    191  C   GLN A  49      27.512  32.284  29.607  1.00  0.00           C  
ATOM    192  O   GLN A  49      28.251  32.769  30.460  1.00  0.00           O  
ATOM    193  N   LEU A  50      27.688  31.033  29.174  1.00  0.00           N  
ATOM    194  CA  LEU A  50      28.707  30.075  29.550  1.00  0.00           C  
ATOM    195  C   LEU A  50      29.870  29.937  28.577  1.00  0.00           C  
ATOM    196  O   LEU A  50      29.609  29.583  27.429  1.00  0.00           O  
ATOM    197  N   GLU A  51      31.122  29.994  29.037  1.00  0.00           N  
ATOM    198  CA  GLU A  51      32.298  30.030  28.192  1.00  0.00           C  
ATOM    199  C   GLU A  51      33.231  28.831  28.290  1.00  0.00           C  
ATOM    200  O   GLU A  51      33.486  28.351  29.392  1.00  0.00           O  
ATOM    201  N   ASP A  52      33.804  28.465  27.140  1.00  0.00           N  
ATOM    202  CA  ASP A  52      33.823  27.045  26.848  1.00  0.00           C  
ATOM    203  C   ASP A  52      34.852  26.314  27.697  1.00  0.00           C  
ATOM    204  O   ASP A  52      34.583  25.198  28.139  1.00  0.00           O  
ATOM    205  N   GLY A  53      35.919  26.983  28.140  1.00  0.00           N  
ATOM    206  CA  GLY A  53      36.979  26.405  28.942  1.00  0.00           C  
ATOM    207  C   GLY A  53      36.913  26.425  30.462  1.00  0.00           C  
ATOM    208  O   GLY A  53      37.664  25.769  31.182  1.00  0.00           O  
ATOM    209  N   ARG A  54      35.855  27.085  30.936  1.00  0.00           N  
ATOM    210  CA  ARG A  54      35.475  27.119  32.333  1.00  0.00           C  
ATOM    211  C   ARG A  54      34.676  25.890  32.740  1.00  0.00           C  
ATOM    212  O   ARG A  54      34.007  25.263  31.921  1.00  0.00           O  
ATOM    213  N   THR A  55      34.626  25.630  34.048  1.00  0.00           N  
ATOM    214  CA  THR A  55      33.894  24.520  34.623  1.00  0.00           C  
ATOM    215  C   THR A  55      32.558  24.946  35.214  1.00  0.00           C  
ATOM    216  O   THR A  55      32.456  26.047  35.749  1.00  0.00           O  
ATOM    217  N   LEU A  56      31.690  23.972  35.494  1.00  0.00           N  
ATOM    218  CA  LEU A  56      30.426  24.193  36.169  1.00  0.00           C  
ATOM    219  C   LEU A  56      30.633  24.777  37.559  1.00  0.00           C  
ATOM    220  O   LEU A  56      29.705  25.482  37.949  1.00  0.00           O  
ATOM    221  N   SER A  57      31.705  24.479  38.297  1.00  0.00           N  
ATOM    222  CA  SER A  57      32.159  25.046  39.551  1.00  0.00           C  
ATOM    223  C   SER A  57      32.250  26.565  39.516  1.00  0.00           C  
ATOM    224  O   SER A  57      31.716  27.178  40.437  1.00  0.00           O  
ATOM    225  N   ASP A  58      32.836  27.179  38.487  1.00  0.00           N  
ATOM    226  CA  ASP A  58      32.965  28.621  38.410  1.00  0.00           C  
ATOM    227  C   ASP A  58      31.703  29.450  38.227  1.00  0.00           C  
ATOM    228  O   ASP A  58      31.643  30.665  38.405  1.00  0.00           O  
ATOM    229  N   TYR A  59      30.586  28.792  37.904  1.00  0.00           N  
ATOM    230  CA  TYR A  59      29.255  29.363  37.927  1.00  0.00           C  
ATOM    231  C   TYR A  59      28.498  29.132  39.227  1.00  0.00           C  
ATOM    232  O   TYR A  59      27.467  29.716  39.555  1.00  0.00           O  
ATOM    233  N   ASN A  60      28.903  28.230  40.124  1.00  0.00           N  
ATOM    234  CA  ASN A  60      28.128  27.485  41.095  1.00  0.00           C  
ATOM    235  C   ASN A  60      26.949  26.732  40.495  1.00  0.00           C  
ATOM    236  O   ASN A  60      25.834  26.853  40.997  1.00  0.00           O  
ATOM    237  N   ILE A  61      27.174  26.045  39.373  1.00  0.00           N  
ATOM    238  CA  ILE A  61      26.114  25.262  38.770  1.00  0.00           C  
ATOM    239  C   ILE A  61      26.064  24.046  39.684  1.00  0.00           C  
ATOM    240  O   ILE A  61      27.106  23.420  39.865  1.00  0.00           O  
ATOM    241  N   GLN A  62      24.939  23.624  40.265  1.00  0.00           N  
ATOM    242  CA  GLN A  62      24.703  22.694  41.350  1.00  0.00           C  
ATOM    243  C   GLN A  62      23.591  21.713  41.005  1.00  0.00           C  
ATOM    244  O   GLN A  62      22.970  21.851  39.954  1.00  0.00           O  
ATOM    245  N   LYS A  63      23.429  20.717  41.878  1.00  0.00           N  
ATOM    246  CA  LYS A  63      22.320  19.785  41.917  1.00  0.00           C  
ATOM    247  C   LYS A  63      21.052  20.544  41.554  1.00  0.00           C  
ATOM    248  O   LYS A  63      20.627  21.529  42.152  1.00  0.00           O  
ATOM    249  N   GLU A  64      20.453  20.059  40.463  1.00  0.00           N  
ATOM    250  CA  GLU A  64      19.272  20.419  39.705  1.00  0.00           C  
ATOM    251  C   GLU A  64      19.031  21.820  39.163  1.00  0.00           C  
ATOM    252  O   GLU A  64      17.984  22.461  39.134  1.00  0.00           O  
ATOM    253  N   SER A  65      20.151  22.443  38.788  1.00  0.00           N  
ATOM    254  CA  SER A  65      20.232  23.769  38.209  1.00  0.00           C  
ATOM    255  C   SER A  65      19.677  23.757  36.792  1.00  0.00           C  
ATOM    256  O   SER A  65      20.075  22.906  35.999  1.00  0.00           O  
ATOM    257  N   THR A  66      18.949  24.722  36.225  1.00  0.00           N  
ATOM    258  CA  THR A  66      18.524  24.750  34.841  1.00  0.00           C  
ATOM    259  C   THR A  66      19.337  25.710  33.985  1.00  0.00           C  
ATOM    260  O   THR A  66      19.629  26.862  34.300  1.00  0.00           O  
ATOM    261  N   LEU A  67      19.854  25.167  32.881  1.00  0.00           N  
ATOM    262  CA  LEU A  67      20.441  25.959  31.819  1.00  0.00           C  
ATOM    263  C   LEU A  67      19.672  26.342  30.562  1.00  0.00           C  
ATOM    264  O   LEU A  67      18.945  25.506  30.032  1.00  0.00           O  
ATOM    265  N   HIS A  68      19.648  27.546  29.984  1.00  0.00           N  
ATOM    266  CA  HIS A  68      18.954  27.790  28.735  1.00  0.00           C  
ATOM    267  C   HIS A  68      19.762  27.551  27.467  1.00  0.00           C  
ATOM    268  O   HIS A  68      20.980  27.692  27.564  1.00  0.00           O  
ATOM    269  N   LEU A  69      19.086  27.649  26.321  1.00  0.00           N  
ATOM    270  CA  LEU A  69      19.687  27.281  25.056  1.00  0.00           C  
ATOM    271  C   LEU A  69      18.985  28.121  24.000  1.00  0.00           C  
ATOM    272  O   LEU A  69      17.853  27.796  23.648  1.00  0.00           O  
ATOM    273  N   VAL A  70      19.660  29.156  23.494  1.00  0.00           N  
ATOM    274  CA  VAL A  70      19.376  29.805  22.229  1.00  0.00           C  
ATOM    275  C   VAL A  70      20.097  29.102  21.086  1.00  0.00           C  
ATOM    276  O   VAL A  70      21.248  28.691  21.206  1.00  0.00           O  
TER
ENDMDL
MODEL      3
ATOM      1  N   GLN A   2      22.032  15.465  37.846  1.00  0.00           N  
ATOM      2  CA  GLN A   2      21.248  15.968  36.736  1.00  0.00           C  
ATOM      3  C   GLN A   2      21.302  17.489  36.770  1.00  0.00           C  
ATOM      4  O   GLN A   2      21.279  18.083  37.845  1.00  0.00           O  
ATOM      5  N   ILE A   3      21.294  17.995  35.535  1.00  0.00           N  
ATOM      6  CA  ILE A   3      20.913  19.345  35.171  1.00  0.00           C  
ATOM      7  C   ILE A   3      19.879  19.365  34.053  1.00  0.00           C  
ATOM      8  O   ILE A   3      19.767  18.408  33.291  1.00  0.00           O  
ATOM      9  N   PHE A   4      19.120  20.462  34.107  1.00  0.00           N  
ATOM     10  CA  PHE A   4      18.068  20.632  33.125  1.00  0.00           C  
ATOM     11  C   PHE A   4      18.520  21.553  32.001  1.00  0.00           C  
ATOM     12  O   PHE A   4      18.991  22.672  32.189  1.00  0.00           O  
ATOM     13  N   VAL A   5      18.103  21.130  30.805  1.00  0.00           N  
ATOM     14  CA  VAL A   5      18.173  21.992  29.643  1.00  0.00           C  
ATOM     15  C   VAL A   5      16.858  22.269  28.928  1.00  0.00           C  
ATOM     16  O   VAL A   5      16.091  21.390  28.539  1.00  0.00           O  
ATOM     17  N   LYS A   6      16.351  23.492  29.106  1.00  0.00           N  
ATOM     18  CA  LYS A   6      15.154  24.020  28.484  1.00  0.00           C  
ATOM     19  C   LYS A   6      15.463  24.778  27.201  1.00  0.00           C  
ATOM     20  O   LYS A   6      16.079  25.832  27.347  1.00  0.00           O  
ATOM     21  N   THR A   7      14.954  24.336  26.048  1.00  0.00           N  
ATOM     22  CA  THR A   7      15.118  25.025  24.784  1.00  0.00           C  
ATOM     23  C   THR A   7      14.153  26.129  24.377  1.00  0.00           C  
ATOM     24  O   THR A   7      13.292  26.342  25.229  1.00  0.00           O  
ATOM     25  N   LEU A   8      14.187  26.640  23.143  1.00  0.00           N  
ATOM     26  CA  LEU A   8      13.490  27.898  22.977  1.00  0.00           C  
ATOM     27  C   LEU A   8      11.968  27.878  22.959  1.00  0.00           C  
ATOM     28  O   LEU A   8      11.206  28.834  23.086  1.00  0.00           O  
ATOM     29  N   THR A   9      11.407  26.678  22.792  1.00  0.00           N  
ATOM     30  CA  THR A   9       9.994  26.356  22.817  1.00  0.00           C  
ATOM     31  C   THR A   9       9.482  26.091  24.226  1.00  0.00           C  
ATOM     32  O   THR A   9       8.319  26.253  24.590  1.00  0.00           O  
ATOM     33  N   GLY A  10      10.419  25.546  25.005  1.00  0.00           N  
ATOM     34  CA  GLY A  10      10.110  25.059  26.334  1.00  0.00           C  
ATOM     35  C   GLY A  10      10.145  23.538  26.368  1.00  0.00           C  
ATOM     36  O   GLY A  10       9.813  22.965  27.403  1.00  0.00           O  
ATOM     37  N   LYS A  11      10.581  22.824  25.327  1.00  0.00           N  
ATOM     38  CA  LYS A  11      10.923  21.420  25.425  1.00  0.00           C  
ATOM     39  C   LYS A  11      12.128  21.374  26.353  1.00  0.00           C  
ATOM     40  O   LYS A  11      13.127  22.088  26.283  1.00  0.00           O  
ATOM     41  N   THR A  12      11.990  20.520  27.369  1.00  0.00           N  
ATOM     42  CA  THR A  12      12.976  20.241  28.393  1.00  0.00           C  
ATOM     43  C   THR A  12      13.678  18.928  28.074  1.00  0.00           C  
ATOM     44  O   THR A  12      12.980  17.994  27.685  1.00  0.00           O  
ATOM     45  N   ILE A  13      14.978  18.845  28.368  1.00  0.00           N  
ATOM     46  CA  ILE A  13      15.945  17.776  28.226  1.00  0.00           C  
ATOM     47  C   ILE A  13      16.681  17.720  29.557  1.00  0.00           C  
ATOM     48  O   ILE A  13      16.639  18.652  30.359  1.00  0.00           O  
ATOM     49  N   THR A  14      17.344  16.614  29.903  1.00  0.00           N  
ATOM     50  CA  THR A  14      17.981  16.183  31.132  1.00  0.00           C  
ATOM     51  C   THR A  14      19.362  15.659  30.765  1.00  0.00           C  
ATOM     52  O   THR A  14      19.550  15.089  29.693  1.00  0.00           O  
ATOM     53  N   LEU A  15      20.377  16.046  31.541  1.00  0.00           N  
ATOM     54  CA  LEU A  15      21.799  15.860  31.338  1.00  0.00           C  
ATOM     55  C   LEU A  15      22.508  15.379  32.597  1.00  0.00           C  
ATOM     56  O   LEU A  15      22.309  15.834  33.720  1.00  0.00           O  
ATOM     57  N   GLU A  16      23.522  14.534  32.399  1.00  0.00           N  
ATOM     58  CA  GLU A  16      24.200  13.806  33.452  1.00  0.00           C  
ATOM     59  C   GLU A  16      25.570  14.446  33.621  1.00  0.00           C  
ATOM     60  O   GLU A  16      26.420  14.365  32.736  1.00  0.00           O  
ATOM     61  N   VAL A  17      25.747  15.355  34.583  1.00  0.00           N  
ATOM     62  CA  VAL A  17      26.885  16.242  34.718  1.00  0.00           C  
ATOM     63  C   VAL A  17      27.607  16.059  36.046  1.00  0.00           C  
ATOM     64  O   VAL A  17      26.950  15.642  36.998  1.00  0.00           O  
ATOM     65  N   GLU A  18      28.892  16.398  36.157  1.00  0.00           N  
ATOM     66  CA  GLU A  18      29.642  16.234  37.386  1.00  0.00           C  
ATOM     67  C   GLU A  18      30.386  17.552  37.549  1.00  0.00           C  
ATOM     68  O   GLU A  18      30.564  18.236  36.544  1.00  0.00           O  
ATOM     69  N   PRO A  19      30.479  18.122  38.753  1.00  0.00           N  
ATOM     70  CA  PRO A  19      30.930  19.483  38.957  1.00  0.00           C  
ATOM     71  C   PRO A  19      32.224  19.882  38.263  1.00  0.00           C  
ATOM     72  O   PRO A  19      32.396  21.079  38.043  1.00  0.00           O  
ATOM     73  N   SER A  20      33.095  18.952  37.868  1.00  0.00           N  
ATOM     74  CA  SER A  20      34.333  19.109  37.130  1.00  0.00           C  
ATOM     75  C   SER A  20      34.273  18.849  35.631  1.00  0.00           C  
ATOM     76  O   SER A  20      35.264  18.843  34.905  1.00  0.00           O  
ATOM     77  N   ASP A  21      33.091  18.809  35.012  1.00  0.00           N  
ATOM     78  CA  ASP A  21      32.879  18.823  33.579  1.00  0.00           C  
ATOM     79  C   ASP A  21      33.084  20.229  33.032  1.00  0.00           C  
ATOM     80  O   ASP A  21      32.650  21.202  33.643  1.00  0.00           O  
ATOM     81  N   THR A  22      33.833  20.372  31.936  1.00  0.00           N  
ATOM     82  CA  THR A  22      34.021  21.623  31.231  1.00  0.00           C  
ATOM     83  C   THR A  22      32.796  22.073  30.448  1.00  0.00           C  
ATOM     84  O   THR A  22      32.057  21.213  29.973  1.00  0.00           O  
ATOM     85  N   ILE A  23      32.582  23.371  30.224  1.00  0.00           N  
ATOM     86  CA  ILE A  23      31.453  23.723  29.388  1.00  0.00           C  
ATOM     87  C   ILE A  23      31.569  23.182  27.971  1.00  0.00           C  
ATOM     88  O   ILE A  23      30.553  22.673  27.502  1.00  0.00           O  
ATOM     89  N   GLU A  24      32.791  23.104  27.437  1.00  0.00           N  
ATOM     90  CA  GLU A  24      33.014  22.374  26.206  1.00  0.00           C  
ATOM     91  C   GLU A  24      32.629  20.901  26.194  1.00  0.00           C  
ATOM     92  O   GLU A  24      31.779  20.578  25.367  1.00  0.00           O  
ATOM     93  N   ASN A  25      33.024  20.092  27.179  1.00  0.00           N  
ATOM     94  CA  ASN A  25      32.542  18.761  27.489  1.00  0.00           C  
ATOM     95  C   ASN A  25      31.022  18.796  27.533  1.00  0.00           C  
ATOM     96  O   ASN A  25      30.408  17.924  26.922  1.00  0.00           O  
ATOM     97  N   VAL A  26      30.337  19.815  28.056  1.00  0.00           N  
ATOM     98  CA  VAL A  26      28.907  19.844  28.286  1.00  0.00           C  
ATOM     99  C   VAL A  26      28.070  20.182  27.061  1.00  0.00           C  
ATOM    100  O   VAL A  26      27.006  19.595  26.874  1.00  0.00           O  
ATOM    101  N   LYS A  27      28.473  21.116  26.198  1.00  0.00           N  
ATOM    102  CA  LYS A  27      27.958  21.201  24.846  1.00  0.00           C  
ATOM    103  C   LYS A  27      28.051  19.902  24.058  1.00  0.00           C  
ATOM    104  O   LYS A  27      27.093  19.630  23.339  1.00  0.00           O  
ATOM    105  N   ALA A  28      29.050  19.052  24.305  1.00  0.00           N  
ATOM    106  CA  ALA A  28      29.116  17.775  23.622  1.00  0.00           C  
ATOM    107  C   ALA A  28      28.045  16.887  24.239  1.00  0.00           C  
ATOM    108  O   ALA A  28      27.388  16.287  23.391  1.00  0.00           O  
ATOM    109  N   LYS A  29      27.793  16.776  25.546  1.00  0.00           N  
ATOM    110  CA  LYS A  29      26.638  16.136  26.142  1.00  0.00           C  
ATOM    111  C   LYS A  29      25.333  16.628  25.531  1.00  0.00           C  
ATOM    112  O   LYS A  29      24.461  15.799  25.280  1.00  0.00           O  
ATOM    113  N   ILE A  30      25.146  17.936  25.348  1.00  0.00           N  
ATOM    114  CA  ILE A  30      23.930  18.354  24.680  1.00  0.00           C  
ATOM    115  C   ILE A  30      23.824  17.849  23.247  1.00  0.00           C  
ATOM    116  O   ILE A  30      22.723  17.471  22.855  1.00  0.00           O  
ATOM    117  N   GLN A  31      24.879  17.782  22.431  1.00  0.00           N  
ATOM    118  CA  GLN A  31      24.959  17.099  21.157  1.00  0.00           C  
ATOM    119  C   GLN A  31      24.551  15.633  21.123  1.00  0.00           C  
ATOM    120  O   GLN A  31      23.658  15.225  20.383  1.00  0.00           O  
ATOM    121  N   ASP A  32      25.001  14.795  22.060  1.00  0.00           N  
ATOM    122  CA  ASP A  32      24.562  13.440  22.326  1.00  0.00           C  
ATOM    123  C   ASP A  32      23.104  13.224  22.701  1.00  0.00           C  
ATOM    124  O   ASP A  32      22.367  12.378  22.200  1.00  0.00           O  
ATOM    125  N   LYS A  33      22.605  14.161  23.512  1.00  0.00           N  
ATOM    126  CA  LYS A  33      21.252  14.168  24.031  1.00  0.00           C  
ATOM    127  C   LYS A  33      20.185  14.678  23.072  1.00  0.00           C  
ATOM    128  O   LYS A  33      19.025  14.274  23.090  1.00  0.00           O  
ATOM    129  N   GLU A  34      20.516  15.722  22.308  1.00  0.00           N  
ATOM    130  CA  GLU A  34      19.580  16.495  21.518  1.00  0.00           C  
ATOM    131  C   GLU A  34      19.979  16.642  20.056  1.00  0.00           C  
ATOM    132  O   GLU A  34      19.181  16.798  19.134  1.00  0.00           O  
ATOM    133  N   GLY A  35      21.252  16.356  19.774  1.00  0.00           N  
ATOM    134  CA  GLY A  35      21.794  16.492  18.437  1.00  0.00           C  
ATOM    135  C   GLY A  35      22.296  17.838  17.935  1.00  0.00           C  
ATOM    136  O   GLY A  35      22.753  17.789  16.794  1.00  0.00           O  
ATOM    137  N   ILE A  36      22.184  19.000  18.581  1.00  0.00           N  
ATOM    138  CA  ILE A  36      22.568  20.318  18.115  1.00  0.00           C  
ATOM    139  C   ILE A  36      24.027  20.558  18.476  1.00  0.00           C  
ATOM    140  O   ILE A  36      24.375  20.567  19.654  1.00  0.00           O  
ATOM    141  N   PRO A  37      24.948  20.733  17.525  1.00  0.00           N  
ATOM    142  CA  PRO A  37      26.379  20.567  17.681  1.00  0.00           C  
ATOM    143  C   PRO A  37      27.053  21.819  18.225  1.00  0.00           C  
ATOM    144  O   PRO A  37      26.433  22.878  18.296  1.00  0.00           O  
ATOM    145  N   PRO A  38      28.242  21.719  18.822  1.00  0.00           N  
ATOM    146  CA  PRO A  38      28.983  22.731  19.547  1.00  0.00           C  
ATOM    147  C   PRO A  38      28.728  24.133  19.012  1.00  0.00           C  
ATOM    148  O   PRO A  38      28.286  24.946  19.822  1.00  0.00           O  
ATOM    149  N   ASP A  39      28.886  24.546  17.753  1.00  0.00           N  
ATOM    150  CA  ASP A  39      28.958  25.933  17.340  1.00  0.00           C  
ATOM    151  C   ASP A  39      27.541  26.357  16.979  1.00  0.00           C  
ATOM    152  O   ASP A  39      27.324  27.512  16.620  1.00  0.00           O  
ATOM    153  N   GLN A  40      26.536  25.493  17.147  1.00  0.00           N  
ATOM    154  CA  GLN A  40      25.130  25.840  17.119  1.00  0.00           C  
ATOM    155  C   GLN A  40      24.672  26.371  18.470  1.00  0.00           C  
ATOM    156  O   GLN A  40      23.615  26.993  18.548  1.00  0.00           O  
ATOM    157  N   GLN A  41      25.388  26.163  19.578  1.00  0.00           N  
ATOM    158  CA  GLN A  41      24.946  26.447  20.928  1.00  0.00           C  
ATOM    159  C   GLN A  41      25.439  27.788  21.452  1.00  0.00           C  
ATOM    160  O   GLN A  41      26.558  28.162  21.110  1.00  0.00           O  
ATOM    161  N   ARG A  42      24.604  28.400  22.297  1.00  0.00           N  
ATOM    162  CA  ARG A  42      24.938  29.366  23.324  1.00  0.00           C  
ATOM    163  C   ARG A  42      24.266  28.956  24.627  1.00  0.00           C  
ATOM    164  O   ARG A  42      23.091  28.608  24.530  1.00  0.00           O  
ATOM    165  N   LEU A  43      25.022  28.890  25.724  1.00  0.00           N  
ATOM    166  CA  LEU A  43      24.447  28.522  27.002  1.00  0.00           C  
ATOM    167  C   LEU A  43      24.277  29.673  27.984  1.00  0.00           C  
ATOM    168  O   LEU A  43      25.119  30.563  28.067  1.00  0.00           O  
ATOM    169  N   ILE A  44      23.115  29.846  28.618  1.00  0.00           N  
ATOM    170  CA  ILE A  44      22.701  30.855  29.571  1.00  0.00           C  
ATOM    171  C   ILE A  44      22.353  30.172  30.886  1.00  0.00           C  
ATOM    172  O   ILE A  44      21.785  29.084  30.822  1.00  0.00           O  
ATOM    173  N   PHE A  45      22.813  30.790  31.977  1.00  0.00           N  
ATOM    174  CA  PHE A  45      22.430  30.516  33.347  1.00  0.00           C  
ATOM    175  C   PHE A  45      22.394  31.772  34.206  1.00  0.00           C  
ATOM    176  O   PHE A  45      23.420  32.449  34.230  1.00  0.00           O  
ATOM    177  N   ALA A  46      21.295  32.033  34.917  1.00  0.00           N  
ATOM    178  CA  ALA A  46      21.177  33.252  35.691  1.00  0.00           C  
ATOM    179  C   ALA A  46      21.631  34.504  34.953  1.00  0.00           C  
ATOM    180  O   ALA A  46      22.555  35.147  35.446  1.00  0.00           O  
ATOM    181  N   GLY A  47      21.068  34.708  33.759  1.00  0.00           N  
ATOM    182  CA  GLY A  47      21.308  35.796  32.833  1.00  0.00           C  
ATOM    183  C   GLY A  47      22.668  35.870  32.157  1.00  0.00           C  
ATOM    184  O   GLY A  47      22.854  36.836  31.420  1.00  0.00           O  
ATOM    185  N   LYS A  48      23.595  34.958  32.460  1.00  0.00           N  
ATOM    186  CA  LYS A  48      25.024  34.989  32.217  1.00  0.00           C  
ATOM    187  C   LYS A  48      25.564  33.917  31.281  1.00  0.00           C  
ATOM    188  O   LYS A  48      25.596  32.732  31.605  1.00  0.00           O  
ATOM    189  N   GLN A  49      25.861  34.327  30.046  1.00  0.00           N  
ATOM    190  CA  GLN A  49      26.326  33.376  29.056  1.00  0.00           C  
ATOM    191  C   GLN A  49      27.573  32.691  29.598  1.00  0.00           C  
ATOM    192  O   GLN A  49      28.577  33.270  30.006  1.00  0.00           O  
ATOM    193  N   LEU A  50      27.668  31.360  29.567  1.00  0.00           N  
ATOM    194  CA  LEU A  50      28.820  30.531  29.857  1.00  0.00           C  
ATOM    195  C   LEU A  50      29.958  30.802  28.883  1.00  0.00           C  
ATOM    196  O   LEU A  50      29.827  31.489  27.873  1.00  0.00           O  
ATOM    197  N   GLU A  51      31.130  30.217  29.137  1.00  0.00           N  
ATOM    198  CA  GLU A  51      32.453  30.277  28.547  1.00  0.00           C  
ATOM    199  C   GLU A  51      33.194  28.951  28.465  1.00  0.00           C  
ATOM    200  O   GLU A  51      33.181  28.294  29.503  1.00  0.00           O  
ATOM    201  N   ASP A  52      33.709  28.637  27.274  1.00  0.00           N  
ATOM    202  CA  ASP A  52      33.920  27.221  27.049  1.00  0.00           C  
ATOM    203  C   ASP A  52      34.875  26.326  27.825  1.00  0.00           C  
ATOM    204  O   ASP A  52      34.485  25.215  28.175  1.00  0.00           O  
ATOM    205  N   GLY A  53      36.083  26.855  28.033  1.00  0.00           N  
ATOM    206  CA  GLY A  53      37.111  26.251  28.855  1.00  0.00           C  
ATOM    207  C   GLY A  53      36.896  26.148  30.359  1.00  0.00           C  
ATOM    208  O   GLY A  53      37.855  25.873  31.076  1.00  0.00           O  
ATOM    209  N   ARG A  54      35.707  26.576  30.788  1.00  0.00           N  
ATOM    210  CA  ARG A  54      35.412  26.702  32.201  1.00  0.00           C  
ATOM    211  C   ARG A  54      34.489  25.613  32.732  1.00  0.00           C  
ATOM    212  O   ARG A  54      33.819  24.881  32.007  1.00  0.00           O  
ATOM    213  N   THR A  55      34.642  25.336  34.029  1.00  0.00           N  
ATOM    214  CA  THR A  55      33.850  24.259  34.587  1.00  0.00           C  
ATOM    215  C   THR A  55      32.481  24.746  35.040  1.00  0.00           C  
ATOM    216  O   THR A  55      32.354  25.865  35.531  1.00  0.00           O  
ATOM    217  N   LEU A  56      31.524  23.815  35.039  1.00  0.00           N  
ATOM    218  CA  LEU A  56      30.260  24.117  35.681  1.00  0.00           C  
ATOM    219  C   LEU A  56      30.358  24.747  37.063  1.00  0.00           C  
ATOM    220  O   LEU A  56      29.466  25.563  37.284  1.00  0.00           O  
ATOM    221  N   SER A  57      31.397  24.480  37.858  1.00  0.00           N  
ATOM    222  CA  SER A  57      31.688  24.999  39.179  1.00  0.00           C  
ATOM    223  C   SER A  57      31.866  26.509  39.104  1.00  0.00           C  
ATOM    224  O   SER A  57      31.405  27.175  40.028  1.00  0.00           O  
ATOM    225  N   ASP A  58      32.426  27.073  38.032  1.00  0.00           N  
ATOM    226  CA  ASP A  58      32.640  28.485  37.788  1.00  0.00           C  
ATOM    227  C   ASP A  58      31.401  29.352  37.960  1.00  0.00           C  
ATOM    228  O   ASP A  58      31.325  30.504  38.380  1.00  0.00           O  
ATOM    229  N   TYR A  59      30.301  28.662  37.650  1.00  0.00           N  
ATOM    230  CA  TYR A  59      29.048  29.271  37.248  1.00  0.00           C  
ATOM    231  C   TYR A  59      28.048  29.227  38.394  1.00  0.00           C  
ATOM    232  O   TYR A  59      27.004  29.861  38.261  1.00  0.00           O  
ATOM    233  N   ASN A  60      28.418  28.524  39.467  1.00  0.00           N  
ATOM    234  CA  ASN A  60      27.517  28.079  40.512  1.00  0.00           C  
ATOM    235  C   ASN A  60      26.364  27.256  39.957  1.00  0.00           C  
ATOM    236  O   ASN A  60      25.236  27.412  40.420  1.00  0.00           O  
ATOM    237  N   ILE A  61      26.652  26.434  38.945  1.00  0.00           N  
ATOM    238  CA  ILE A  61      25.714  25.435  38.473  1.00  0.00           C  
ATOM    239  C   ILE A  61      25.670  24.257  39.434  1.00  0.00           C  
ATOM    240  O   ILE A  61      26.665  23.540  39.517  1.00  0.00           O  
ATOM    241  N   GLN A  62      24.683  24.016  40.301  1.00  0.00           N  
ATOM    242  CA  GLN A  62      24.715  22.873  41.189  1.00  0.00           C  
ATOM    243  C   GLN A  62      23.791  21.796  40.640  1.00  0.00           C  
ATOM    244  O   GLN A  62      23.415  21.827  39.470  1.00  0.00           O  
ATOM    245  N   LYS A  63      23.451  20.823  41.490  1.00  0.00           N  
ATOM    246  CA  LYS A  63      22.390  19.896  41.158  1.00  0.00           C  
ATOM    247  C   LYS A  63      21.141  20.661  40.743  1.00  0.00           C  
ATOM    248  O   LYS A  63      20.863  21.777  41.175  1.00  0.00           O  
ATOM    249  N   GLU A  64      20.492  20.181  39.679  1.00  0.00           N  
ATOM    250  CA  GLU A  64      19.194  20.565  39.163  1.00  0.00           C  
ATOM    251  C   GLU A  64      19.068  22.041  38.813  1.00  0.00           C  
ATOM    252  O   GLU A  64      17.949  22.546  38.859  1.00  0.00           O  
ATOM    253  N   SER A  65      20.192  22.668  38.457  1.00  0.00           N  
ATOM    254  CA  SER A  65      20.170  24.023  37.948  1.00  0.00           C  
ATOM    255  C   SER A  65      19.821  24.119  36.469  1.00  0.00           C  
ATOM    256  O   SER A  65      20.613  23.561  35.714  1.00  0.00           O  
ATOM    257  N   THR A  66      18.687  24.655  36.011  1.00  0.00           N  
ATOM    258  CA  THR A  66      18.330  24.681  34.607  1.00  0.00           C  
ATOM    259  C   THR A  66      18.945  25.774  33.744  1.00  0.00           C  
ATOM    260  O   THR A  66      19.036  26.956  34.068  1.00  0.00           O  
ATOM    261  N   LEU A  67      19.610  25.334  32.672  1.00  0.00           N  
ATOM    262  CA  LEU A  67      20.151  26.166  31.616  1.00  0.00           C  
ATOM    263  C   LEU A  67      19.209  26.462  30.458  1.00  0.00           C  
ATOM    264  O   LEU A  67      18.367  25.592  30.243  1.00  0.00           O  
ATOM    265  N   HIS A  68      19.238  27.558  29.697  1.00  0.00           N  
ATOM    266  CA  HIS A  68      18.432  27.874  28.535  1.00  0.00           C  
ATOM    267  C   HIS A  68      19.315  27.897  27.295  1.00  0.00           C  
ATOM    268  O   HIS A  68      20.228  28.708  27.162  1.00  0.00           O  
ATOM    269  N   LEU A  69      19.175  26.831  26.505  1.00  0.00           N  
ATOM    270  CA  LEU A  69      19.840  26.714  25.223  1.00  0.00           C  
ATOM    271  C   LEU A  69      19.147  27.541  24.149  1.00  0.00           C  
ATOM    272  O   LEU A  69      17.984  27.279  23.849  1.00  0.00           O  
ATOM    273  N   VAL A  70      19.941  28.384  23.486  1.00  0.00           N  
ATOM    274  CA  VAL A  70      19.646  29.136  22.282  1.00  0.00           C  
ATOM    275  C   VAL A  70      20.525  28.704  21.118  1.00  0.00           C  
ATOM    276  O   VAL A  70      21.657  28.281  21.344  1.00  0.00           O  
TER
ENDMDL
MODEL      4
ATOM      1  N   GLN A   2      22.351  15.669  39.208  1.00  0.00           N  
ATOM      2  CA  GLN A   2      21.491  16.126  38.135  1.00  0.00           C  
ATOM      3  C   GLN A   2      21.428  17.636  37.951  1.00  0.00           C  
ATOM      4  O   GLN A   2      21.413  18.450  38.871  1.00  0.00           O  
ATOM      5  N   ILE A   3      21.444  18.100  36.700  1.00  0.00           N  
ATOM      6  CA  ILE A   3      21.229  19.416  36.129  1.00  0.00           C  
ATOM      7  C   ILE A   3      20.405  19.443  34.851  1.00  0.00           C  
ATOM      8  O   ILE A   3      20.302  18.474  34.102  1.00  0.00           O  
ATOM      9  N   PHE A   4      19.725  20.574  34.643  1.00  0.00           N  
ATOM     10  CA  PHE A   4      18.866  20.650  33.480  1.00  0.00           C  
ATOM     11  C   PHE A   4      19.290  21.700  32.464  1.00  0.00           C  
ATOM     12  O   PHE A   4      19.886  22.719  32.805  1.00  0.00           O  
ATOM     13  N   VAL A   5      18.904  21.483  31.203  1.00  0.00           N  
ATOM     14  CA  VAL A   5      18.924  22.412  30.092  1.00  0.00           C  
ATOM     15  C   VAL A   5      17.676  22.490  29.225  1.00  0.00           C  
ATOM     16  O   VAL A   5      17.204  21.481  28.706  1.00  0.00           O  
ATOM     17  N   LYS A   6      17.088  23.682  29.100  1.00  0.00           N  
ATOM     18  CA  LYS A   6      15.896  23.909  28.307  1.00  0.00           C  
ATOM     19  C   LYS A   6      16.443  24.166  26.910  1.00  0.00           C  
ATOM     20  O   LYS A   6      16.883  25.276  26.622  1.00  0.00           O  
ATOM     21  N   THR A   7      15.981  23.204  26.108  1.00  0.00           N  
ATOM     22  CA  THR A   7      16.128  23.324  24.670  1.00  0.00           C  
ATOM     23  C   THR A   7      15.081  24.299  24.153  1.00  0.00           C  
ATOM     24  O   THR A   7      14.123  24.612  24.856  1.00  0.00           O  
ATOM     25  N   LEU A   8      15.090  24.510  22.834  1.00  0.00           N  
ATOM     26  CA  LEU A   8      14.461  25.724  22.354  1.00  0.00           C  
ATOM     27  C   LEU A   8      12.957  25.846  22.543  1.00  0.00           C  
ATOM     28  O   LEU A   8      12.616  26.926  23.021  1.00  0.00           O  
ATOM     29  N   THR A   9      12.193  24.758  22.420  1.00  0.00           N  
ATOM     30  CA  THR A   9      10.805  24.696  22.829  1.00  0.00           C  
ATOM     31  C   THR A   9      10.500  24.347  24.279  1.00  0.00           C  
ATOM     32  O   THR A   9       9.393  23.898  24.569  1.00  0.00           O  
ATOM     33  N   GLY A  10      11.422  24.576  25.217  1.00  0.00           N  
ATOM     34  CA  GLY A  10      11.241  24.509  26.653  1.00  0.00           C  
ATOM     35  C   GLY A  10      11.273  23.070  27.150  1.00  0.00           C  
ATOM     36  O   GLY A  10      10.922  22.782  28.291  1.00  0.00           O  
ATOM     37  N   LYS A  11      11.503  22.053  26.315  1.00  0.00           N  
ATOM     38  CA  LYS A  11      11.633  20.672  26.731  1.00  0.00           C  
ATOM     39  C   LYS A  11      12.914  20.552  27.545  1.00  0.00           C  
ATOM     40  O   LYS A  11      13.794  21.403  27.432  1.00  0.00           O  
ATOM     41  N   THR A  12      12.824  19.635  28.511  1.00  0.00           N  
ATOM     42  CA  THR A  12      13.866  19.305  29.462  1.00  0.00           C  
ATOM     43  C   THR A  12      14.628  18.215  28.722  1.00  0.00           C  
ATOM     44  O   THR A  12      14.063  17.143  28.517  1.00  0.00           O  
ATOM     45  N   ILE A  13      15.890  18.487  28.384  1.00  0.00           N  
ATOM     46  CA  ILE A  13      16.844  17.398  28.440  1.00  0.00           C  
ATOM     47  C   ILE A  13      17.289  17.350  29.896  1.00  0.00           C  
ATOM     48  O   ILE A  13      17.396  18.366  30.579  1.00  0.00           O  
ATOM     49  N   THR A  14      17.467  16.156  30.466  1.00  0.00           N  
ATOM     50  CA  THR A  14      17.846  15.977  31.853  1.00  0.00           C  
ATOM     51  C   THR A  14      19.237  15.360  31.817  1.00  0.00           C  
ATOM     52  O   THR A  14      19.377  14.222  31.375  1.00  0.00           O  
ATOM     53  N   LEU A  15      20.248  16.125  32.235  1.00  0.00           N  
ATOM     54  CA  LEU A  15      21.650  15.761  32.248  1.00  0.00           C  
ATOM     55  C   LEU A  15      22.206  15.275  33.579  1.00  0.00           C  
ATOM     56  O   LEU A  15      22.098  15.838  34.665  1.00  0.00           O  
ATOM     57  N   GLU A  16      23.091  14.283  33.462  1.00  0.00           N  
ATOM     58  CA  GLU A  16      23.841  13.889  34.637  1.00  0.00           C  
ATOM     59  C   GLU A  16      25.310  14.220  34.421  1.00  0.00           C  
ATOM     60  O   GLU A  16      25.963  13.872  33.440  1.00  0.00           O  
ATOM     61  N   VAL A  17      25.803  15.013  35.376  1.00  0.00           N  
ATOM     62  CA  VAL A  17      27.167  15.486  35.498  1.00  0.00           C  
ATOM     63  C   VAL A  17      27.781  15.365  36.885  1.00  0.00           C  
ATOM     64  O   VAL A  17      27.108  15.009  37.849  1.00  0.00           O  
ATOM     65  N   GLU A  18      29.027  15.812  37.060  1.00  0.00           N  
ATOM     66  CA  GLU A  18      29.648  16.240  38.297  1.00  0.00           C  
ATOM     67  C   GLU A  18      30.135  17.678  38.183  1.00  0.00           C  
ATOM     68  O   GLU A  18      30.255  18.135  37.048  1.00  0.00           O  
ATOM     69  N   PRO A  19      30.483  18.474  39.195  1.00  0.00           N  
ATOM     70  CA  PRO A  19      30.825  19.875  39.047  1.00  0.00           C  
ATOM     71  C   PRO A  19      32.098  20.071  38.236  1.00  0.00           C  
ATOM     72  O   PRO A  19      32.375  21.127  37.672  1.00  0.00           O  
ATOM     73  N   SER A  20      32.962  19.055  38.186  1.00  0.00           N  
ATOM     74  CA  SER A  20      34.098  18.794  37.327  1.00  0.00           C  
ATOM     75  C   SER A  20      33.891  18.868  35.820  1.00  0.00           C  
ATOM     76  O   SER A  20      34.838  19.032  35.055  1.00  0.00           O  
ATOM     77  N   ASP A  21      32.745  18.505  35.238  1.00  0.00           N  
ATOM     78  CA  ASP A  21      32.450  18.635  33.826  1.00  0.00           C  
ATOM     79  C   ASP A  21      32.634  20.025  33.234  1.00  0.00           C  
ATOM     80  O   ASP A  21      32.155  21.033  33.750  1.00  0.00           O  
ATOM     81  N   THR A  22      33.055  20.067  31.968  1.00  0.00           N  
ATOM     82  CA  THR A  22      33.176  21.259  31.154  1.00  0.00           C  
ATOM     83  C   THR A  22      31.937  21.637  30.355  1.00  0.00           C  
ATOM     84  O   THR A  22      31.062  20.810  30.104  1.00  0.00           O  
ATOM     85  N   ILE A  23      31.871  22.920  29.995  1.00  0.00           N  
ATOM     86  CA  ILE A  23      30.824  23.407  29.120  1.00  0.00           C  
ATOM     87  C   ILE A  23      30.960  22.839  27.714  1.00  0.00           C  
ATOM     88  O   ILE A  23      29.976  22.322  27.191  1.00  0.00           O  
ATOM     89  N   GLU A  24      32.159  22.755  27.134  1.00  0.00           N  
ATOM     90  CA  GLU A  24      32.462  21.904  26.000  1.00  0.00           C  
ATOM     91  C   GLU A  24      31.880  20.501  26.097  1.00  0.00           C  
ATOM     92  O   GLU A  24      31.222  19.932  25.229  1.00  0.00           O  
ATOM     93  N   ASN A  25      32.002  19.841  27.250  1.00  0.00           N  
ATOM     94  CA  ASN A  25      31.514  18.499  27.500  1.00  0.00           C  
ATOM     95  C   ASN A  25      29.996  18.475  27.618  1.00  0.00           C  
ATOM     96  O   ASN A  25      29.315  17.564  27.154  1.00  0.00           O  
ATOM     97  N   VAL A  26      29.366  19.518  28.162  1.00  0.00           N  
ATOM     98  CA  VAL A  26      27.945  19.484  28.449  1.00  0.00           C  
ATOM     99  C   VAL A  26      27.092  20.060  27.329  1.00  0.00           C  
ATOM    100  O   VAL A  26      25.941  19.638  27.246  1.00  0.00           O  
ATOM    101  N   LYS A  27      27.558  20.790  26.313  1.00  0.00           N  
ATOM    102  CA  LYS A  27      27.151  20.827  24.923  1.00  0.00           C  
ATOM    103  C   LYS A  27      27.361  19.515  24.181  1.00  0.00           C  
ATOM    104  O   LYS A  27      26.505  19.248  23.339  1.00  0.00           O  
ATOM    105  N   ALA A  28      28.420  18.738  24.419  1.00  0.00           N  
ATOM    106  CA  ALA A  28      28.532  17.540  23.612  1.00  0.00           C  
ATOM    107  C   ALA A  28      27.451  16.490  23.824  1.00  0.00           C  
ATOM    108  O   ALA A  28      26.853  16.110  22.819  1.00  0.00           O  
ATOM    109  N   LYS A  29      27.361  16.001  25.061  1.00  0.00           N  
ATOM    110  CA  LYS A  29      26.168  15.443  25.666  1.00  0.00           C  
ATOM    111  C   LYS A  29      24.877  15.979  25.063  1.00  0.00           C  
ATOM    112  O   LYS A  29      23.929  15.203  24.976  1.00  0.00           O  
ATOM    113  N   ILE A  30      24.696  17.285  24.852  1.00  0.00           N  
ATOM    114  CA  ILE A  30      23.506  17.775  24.186  1.00  0.00           C  
ATOM    115  C   ILE A  30      23.617  17.652  22.673  1.00  0.00           C  
ATOM    116  O   ILE A  30      22.610  17.214  22.120  1.00  0.00           O  
ATOM    117  N   GLN A  31      24.710  17.869  21.938  1.00  0.00           N  
ATOM    118  CA  GLN A  31      24.869  17.622  20.520  1.00  0.00           C  
ATOM    119  C   GLN A  31      24.474  16.212  20.105  1.00  0.00           C  
ATOM    120  O   GLN A  31      23.776  16.143  19.096  1.00  0.00           O  
ATOM    121  N   ASP A  32      24.894  15.190  20.855  1.00  0.00           N  
ATOM    122  CA  ASP A  32      24.415  13.825  20.933  1.00  0.00           C  
ATOM    123  C   ASP A  32      22.950  13.507  20.669  1.00  0.00           C  
ATOM    124  O   ASP A  32      22.592  12.403  20.265  1.00  0.00           O  
ATOM    125  N   LYS A  33      22.086  14.495  20.913  1.00  0.00           N  
ATOM    126  CA  LYS A  33      20.671  14.210  21.041  1.00  0.00           C  
ATOM    127  C   LYS A  33      19.775  15.164  20.262  1.00  0.00           C  
ATOM    128  O   LYS A  33      19.004  14.805  19.375  1.00  0.00           O  
ATOM    129  N   GLU A  34      19.847  16.489  20.411  1.00  0.00           N  
ATOM    130  CA  GLU A  34      19.340  17.496  19.502  1.00  0.00           C  
ATOM    131  C   GLU A  34      19.975  17.611  18.124  1.00  0.00           C  
ATOM    132  O   GLU A  34      19.383  18.182  17.211  1.00  0.00           O  
ATOM    133  N   GLY A  35      21.245  17.221  17.988  1.00  0.00           N  
ATOM    134  CA  GLY A  35      21.833  17.267  16.664  1.00  0.00           C  
ATOM    135  C   GLY A  35      22.290  18.634  16.176  1.00  0.00           C  
ATOM    136  O   GLY A  35      22.467  18.846  14.978  1.00  0.00           O  
ATOM    137  N   ILE A  36      22.562  19.533  17.126  1.00  0.00           N  
ATOM    138  CA  ILE A  36      23.031  20.903  17.114  1.00  0.00           C  
ATOM    139  C   ILE A  36      24.507  21.048  17.453  1.00  0.00           C  
ATOM    140  O   ILE A  36      24.813  20.763  18.608  1.00  0.00           O  
ATOM    141  N   PRO A  37      25.437  21.371  16.551  1.00  0.00           N  
ATOM    142  CA  PRO A  37      26.832  21.715  16.741  1.00  0.00           C  
ATOM    143  C   PRO A  37      27.164  22.622  17.917  1.00  0.00           C  
ATOM    144  O   PRO A  37      26.316  23.465  18.197  1.00  0.00           O  
ATOM    145  N   PRO A  38      28.308  22.495  18.593  1.00  0.00           N  
ATOM    146  CA  PRO A  38      28.622  23.279  19.771  1.00  0.00           C  
ATOM    147  C   PRO A  38      28.749  24.781  19.569  1.00  0.00           C  
ATOM    148  O   PRO A  38      28.218  25.530  20.386  1.00  0.00           O  
ATOM    149  N   ASP A  39      29.310  25.155  18.416  1.00  0.00           N  
ATOM    150  CA  ASP A  39      29.325  26.460  17.786  1.00  0.00           C  
ATOM    151  C   ASP A  39      27.947  27.072  17.580  1.00  0.00           C  
ATOM    152  O   ASP A  39      27.795  28.290  17.640  1.00  0.00           O  
ATOM    153  N   GLN A  40      26.843  26.360  17.344  1.00  0.00           N  
ATOM    154  CA  GLN A  40      25.490  26.867  17.238  1.00  0.00           C  
ATOM    155  C   GLN A  40      24.889  27.134  18.610  1.00  0.00           C  
ATOM    156  O   GLN A  40      23.963  27.929  18.759  1.00  0.00           O  
ATOM    157  N   GLN A  41      25.218  26.417  19.688  1.00  0.00           N  
ATOM    158  CA  GLN A  41      24.778  26.412  21.068  1.00  0.00           C  
ATOM    159  C   GLN A  41      25.366  27.415  22.050  1.00  0.00           C  
ATOM    160  O   GLN A  41      26.566  27.575  22.264  1.00  0.00           O  
ATOM    161  N   ARG A  42      24.496  28.275  22.584  1.00  0.00           N  
ATOM    162  CA  ARG A  42      24.825  29.370  23.472  1.00  0.00           C  
ATOM    163  C   ARG A  42      24.175  28.955  24.784  1.00  0.00           C  
ATOM    164  O   ARG A  42      22.953  28.836  24.838  1.00  0.00           O  
ATOM    165  N   LEU A  43      24.912  28.653  25.855  1.00  0.00           N  
ATOM    166  CA  LEU A  43      24.406  28.303  27.167  1.00  0.00           C  
ATOM    167  C   LEU A  43      24.350  29.497  28.111  1.00  0.00           C  
ATOM    168  O   LEU A  43      25.320  30.237  28.249  1.00  0.00           O  
ATOM    169  N   ILE A  44      23.150  29.749  28.641  1.00  0.00           N  
ATOM    170  CA  ILE A  44      22.865  30.844  29.547  1.00  0.00           C  
ATOM    171  C   ILE A  44      22.468  30.340  30.926  1.00  0.00           C  
ATOM    172  O   ILE A  44      21.786  29.329  31.089  1.00  0.00           O  
ATOM    173  N   PHE A  45      22.975  31.060  31.929  1.00  0.00           N  
ATOM    174  CA  PHE A  45      22.653  30.934  33.335  1.00  0.00           C  
ATOM    175  C   PHE A  45      22.559  32.238  34.115  1.00  0.00           C  
ATOM    176  O   PHE A  45      23.487  33.043  34.086  1.00  0.00           O  
ATOM    177  N   ALA A  46      21.432  32.490  34.783  1.00  0.00           N  
ATOM    178  CA  ALA A  46      21.134  33.727  35.477  1.00  0.00           C  
ATOM    179  C   ALA A  46      21.509  34.960  34.667  1.00  0.00           C  
ATOM    180  O   ALA A  46      22.360  35.708  35.144  1.00  0.00           O  
ATOM    181  N   GLY A  47      21.101  35.137  33.409  1.00  0.00           N  
ATOM    182  CA  GLY A  47      21.461  36.220  32.515  1.00  0.00           C  
ATOM    183  C   GLY A  47      22.907  36.248  32.041  1.00  0.00           C  
ATOM    184  O   GLY A  47      23.209  37.192  31.314  1.00  0.00           O  
ATOM    185  N   LYS A  48      23.790  35.269  32.257  1.00  0.00           N  
ATOM    186  CA  LYS A  48      25.087  35.133  31.626  1.00  0.00           C  
ATOM    187  C   LYS A  48      25.269  33.980  30.649  1.00  0.00           C  
ATOM    188  O   LYS A  48      24.923  32.816  30.839  1.00  0.00           O  
ATOM    189  N   GLN A  49      25.837  34.410  29.521  1.00  0.00           N  
ATOM    190  CA  GLN A  49      26.410  33.564  28.494  1.00  0.00           C  
ATOM    191  C   GLN A  49      27.591  32.887  29.176  1.00  0.00           C  
ATOM    192  O   GLN A  49      28.424  33.529  29.812  1.00  0.00           O  
ATOM    193  N   LEU A  50      27.710  31.593  28.872  1.00  0.00           N  
ATOM    194  CA  LEU A  50      28.776  30.791  29.437  1.00  0.00           C  
ATOM    195  C   LEU A  50      29.778  30.395  28.361  1.00  0.00           C  
ATOM    196  O   LEU A  50      29.383  29.990  27.270  1.00  0.00           O  
ATOM    197  N   GLU A  51      31.052  30.418  28.758  1.00  0.00           N  
ATOM    198  CA  GLU A  51      32.175  30.049  27.919  1.00  0.00           C  
ATOM    199  C   GLU A  51      32.659  28.608  27.988  1.00  0.00           C  
ATOM    200  O   GLU A  51      32.417  27.896  28.959  1.00  0.00           O  
ATOM    201  N   ASP A  52      33.223  28.110  26.885  1.00  0.00           N  
ATOM    202  CA  ASP A  52      33.086  26.681  26.690  1.00  0.00           C  
ATOM    203  C   ASP A  52      34.142  25.851  27.405  1.00  0.00           C  
ATOM    204  O   ASP A  52      33.840  24.793  27.954  1.00  0.00           O  
ATOM    205  N   GLY A  53      35.330  26.401  27.667  1.00  0.00           N  
ATOM    206  CA  GLY A  53      36.419  25.785  28.398  1.00  0.00           C  
ATOM    207  C   GLY A  53      36.298  25.704  29.913  1.00  0.00           C  
ATOM    208  O   GLY A  53      37.233  25.362  30.633  1.00  0.00           O  
ATOM    209  N   ARG A  54      35.153  26.169  30.419  1.00  0.00           N  
ATOM    210  CA  ARG A  54      34.894  26.408  31.824  1.00  0.00           C  
ATOM    211  C   ARG A  54      33.894  25.382  32.339  1.00  0.00           C  
ATOM    212  O   ARG A  54      33.307  24.600  31.594  1.00  0.00           O  
ATOM    213  N   THR A  55      34.093  25.174  33.643  1.00  0.00           N  
ATOM    214  CA  THR A  55      33.275  24.195  34.330  1.00  0.00           C  
ATOM    215  C   THR A  55      31.997  24.805  34.889  1.00  0.00           C  
ATOM    216  O   THR A  55      31.698  25.981  35.080  1.00  0.00           O  
ATOM    217  N   LEU A  56      31.167  23.846  35.305  1.00  0.00           N  
ATOM    218  CA  LEU A  56      30.002  23.949  36.159  1.00  0.00           C  
ATOM    219  C   LEU A  56      30.286  24.788  37.397  1.00  0.00           C  
ATOM    220  O   LEU A  56      29.461  25.580  37.848  1.00  0.00           O  
ATOM    221  N   SER A  57      31.450  24.638  38.033  1.00  0.00           N  
ATOM    222  CA  SER A  57      31.866  25.449  39.160  1.00  0.00           C  
ATOM    223  C   SER A  57      32.372  26.878  39.013  1.00  0.00           C  
ATOM    224  O   SER A  57      32.061  27.625  39.938  1.00  0.00           O  
ATOM    225  N   ASP A  58      32.741  27.342  37.817  1.00  0.00           N  
ATOM    226  CA  ASP A  58      32.971  28.735  37.489  1.00  0.00           C  
ATOM    227  C   ASP A  58      31.752  29.618  37.710  1.00  0.00           C  
ATOM    228  O   ASP A  58      31.809  30.821  37.955  1.00  0.00           O  
ATOM    229  N   TYR A  59      30.578  28.985  37.641  1.00  0.00           N  
ATOM    230  CA  TYR A  59      29.253  29.561  37.525  1.00  0.00           C  
ATOM    231  C   TYR A  59      28.459  29.107  38.741  1.00  0.00           C  
ATOM    232  O   TYR A  59      27.466  29.745  39.080  1.00  0.00           O  
ATOM    233  N   ASN A  60      28.943  28.198  39.590  1.00  0.00           N  
ATOM    234  CA  ASN A  60      28.097  27.577  40.589  1.00  0.00           C  
ATOM    235  C   ASN A  60      26.707  27.194  40.098  1.00  0.00           C  
ATOM    236  O   ASN A  60      25.663  27.318  40.735  1.00  0.00           O  
ATOM    237  N   ILE A  61      26.786  26.300  39.110  1.00  0.00           N  
ATOM    238  CA  ILE A  61      25.653  25.461  38.780  1.00  0.00           C  
ATOM    239  C   ILE A  61      25.459  24.338  39.790  1.00  0.00           C  
ATOM    240  O   ILE A  61      26.297  23.493  40.097  1.00  0.00           O  
ATOM    241  N   GLN A  62      24.309  24.376  40.467  1.00  0.00           N  
ATOM    242  CA  GLN A  62      23.878  23.485  41.525  1.00  0.00           C  
ATOM    243  C   GLN A  62      22.862  22.427  41.119  1.00  0.00           C  
ATOM    244  O   GLN A  62      22.263  22.474  40.047  1.00  0.00           O  
ATOM    245  N   LYS A  63      22.811  21.429  42.004  1.00  0.00           N  
ATOM    246  CA  LYS A  63      21.785  20.414  41.869  1.00  0.00           C  
ATOM    247  C   LYS A  63      20.401  20.978  41.584  1.00  0.00           C  
ATOM    248  O   LYS A  63      19.906  21.920  42.200  1.00  0.00           O  
ATOM    249  N   GLU A  64      19.761  20.245  40.671  1.00  0.00           N  
ATOM    250  CA  GLU A  64      18.482  20.531  40.051  1.00  0.00           C  
ATOM    251  C   GLU A  64      18.347  21.847  39.298  1.00  0.00           C  
ATOM    252  O   GLU A  64      17.252  22.366  39.094  1.00  0.00           O  
ATOM    253  N   SER A  65      19.363  22.597  38.863  1.00  0.00           N  
ATOM    254  CA  SER A  65      19.316  23.928  38.294  1.00  0.00           C  
ATOM    255  C   SER A  65      19.295  23.933  36.772  1.00  0.00           C  
ATOM    256  O   SER A  65      19.634  23.010  36.036  1.00  0.00           O  
ATOM    257  N   THR A  66      19.088  25.062  36.088  1.00  0.00           N  
ATOM    258  CA  THR A  66      18.616  25.072  34.718  1.00  0.00           C  
ATOM    259  C   THR A  66      19.525  25.995  33.921  1.00  0.00           C  
ATOM    260  O   THR A  66      19.831  27.117  34.317  1.00  0.00           O  
ATOM    261  N   LEU A  67      20.014  25.540  32.765  1.00  0.00           N  
ATOM    262  CA  LEU A  67      20.688  26.293  31.725  1.00  0.00           C  
ATOM    263  C   LEU A  67      19.634  26.478  30.644  1.00  0.00           C  
ATOM    264  O   LEU A  67      18.692  25.741  30.357  1.00  0.00           O  
ATOM    265  N   HIS A  68      19.834  27.522  29.836  1.00  0.00           N  
ATOM    266  CA  HIS A  68      18.990  27.834  28.700  1.00  0.00           C  
ATOM    267  C   HIS A  68      19.788  27.877  27.406  1.00  0.00           C  
ATOM    268  O   HIS A  68      21.005  27.970  27.554  1.00  0.00           O  
ATOM    269  N   LEU A  69      19.079  27.753  26.281  1.00  0.00           N  
ATOM    270  CA  LEU A  69      19.763  27.579  25.016  1.00  0.00           C  
ATOM    271  C   LEU A  69      19.232  28.602  24.022  1.00  0.00           C  
ATOM    272  O   LEU A  69      18.036  28.664  23.748  1.00  0.00           O  
ATOM    273  N   VAL A  70      20.180  29.262  23.355  1.00  0.00           N  
ATOM    274  CA  VAL A  70      19.918  30.254  22.332  1.00  0.00           C  
ATOM    275  C   VAL A  70      20.839  29.872  21.182  1.00  0.00           C  
ATOM    276  O   VAL A  70      21.979  29.449  21.367  1.00  0.00           O  
TER
ENDMDL
MODEL      5
ATOM      1  N   GLN A   2      22.813  15.646  38.028  1.00  0.00           N  
ATOM      2  CA  GLN A   2      21.800  15.922  37.030  1.00  0.00           C  
ATOM      3  C   GLN A   2      21.536  17.422  36.999  1.00  0.00           C  
ATOM      4  O   GLN A   2      21.171  18.108  37.949  1.00  0.00           O  
ATOM      5  N   ILE A   3      21.619  17.992  35.794  1.00  0.00           N  
ATOM      6  CA  ILE A   3      21.148  19.275  35.313  1.00  0.00           C  
ATOM      7  C   ILE A   3      20.003  19.213  34.313  1.00  0.00           C  
ATOM      8  O   ILE A   3      19.667  18.133  33.831  1.00  0.00           O  
ATOM      9  N   PHE A   4      19.352  20.334  33.994  1.00  0.00           N  
ATOM     10  CA  PHE A   4      18.345  20.387  32.954  1.00  0.00           C  
ATOM     11  C   PHE A   4      18.681  21.460  31.927  1.00  0.00           C  
ATOM     12  O   PHE A   4      18.689  22.634  32.287  1.00  0.00           O  
ATOM     13  N   VAL A   5      18.775  21.105  30.644  1.00  0.00           N  
ATOM     14  CA  VAL A   5      18.798  22.142  29.630  1.00  0.00           C  
ATOM     15  C   VAL A   5      17.401  22.307  29.050  1.00  0.00           C  
ATOM     16  O   VAL A   5      16.727  21.420  28.531  1.00  0.00           O  
ATOM     17  N   LYS A   6      16.843  23.517  29.122  1.00  0.00           N  
ATOM     18  CA  LYS A   6      15.562  23.912  28.572  1.00  0.00           C  
ATOM     19  C   LYS A   6      15.650  24.757  27.309  1.00  0.00           C  
ATOM     20  O   LYS A   6      16.311  25.792  27.255  1.00  0.00           O  
ATOM     21  N   THR A   7      15.091  24.310  26.183  1.00  0.00           N  
ATOM     22  CA  THR A   7      15.171  25.098  24.970  1.00  0.00           C  
ATOM     23  C   THR A   7      13.987  26.050  24.869  1.00  0.00           C  
ATOM     24  O   THR A   7      12.950  25.791  25.477  1.00  0.00           O  
ATOM     25  N   LEU A   8      14.200  27.246  24.318  1.00  0.00           N  
ATOM     26  CA  LEU A   8      13.122  28.006  23.717  1.00  0.00           C  
ATOM     27  C   LEU A   8      11.793  27.337  23.390  1.00  0.00           C  
ATOM     28  O   LEU A   8      10.729  27.871  23.692  1.00  0.00           O  
ATOM     29  N   THR A   9      11.855  26.179  22.728  1.00  0.00           N  
ATOM     30  CA  THR A   9      10.702  25.416  22.295  1.00  0.00           C  
ATOM     31  C   THR A   9      10.124  24.372  23.239  1.00  0.00           C  
ATOM     32  O   THR A   9       9.360  23.498  22.833  1.00  0.00           O  
ATOM     33  N   GLY A  10      10.321  24.484  24.555  1.00  0.00           N  
ATOM     34  CA  GLY A  10       9.422  23.868  25.509  1.00  0.00           C  
ATOM     35  C   GLY A  10       9.860  22.523  26.071  1.00  0.00           C  
ATOM     36  O   GLY A  10       9.294  22.064  27.060  1.00  0.00           O  
ATOM     37  N   LYS A  11      10.810  21.846  25.421  1.00  0.00           N  
ATOM     38  CA  LYS A  11      11.405  20.605  25.874  1.00  0.00           C  
ATOM     39  C   LYS A  11      12.470  20.851  26.933  1.00  0.00           C  
ATOM     40  O   LYS A  11      13.370  21.677  26.797  1.00  0.00           O  
ATOM     41  N   THR A  12      12.400  20.031  27.985  1.00  0.00           N  
ATOM     42  CA  THR A  12      13.418  19.866  29.002  1.00  0.00           C  
ATOM     43  C   THR A  12      14.161  18.551  28.821  1.00  0.00           C  
ATOM     44  O   THR A  12      13.548  17.527  28.522  1.00  0.00           O  
ATOM     45  N   ILE A  13      15.478  18.746  28.726  1.00  0.00           N  
ATOM     46  CA  ILE A  13      16.446  17.734  28.353  1.00  0.00           C  
ATOM     47  C   ILE A  13      17.284  17.266  29.534  1.00  0.00           C  
ATOM     48  O   ILE A  13      18.115  18.062  29.962  1.00  0.00           O  
ATOM     49  N   THR A  14      17.220  16.029  30.033  1.00  0.00           N  
ATOM     50  CA  THR A  14      18.035  15.485  31.101  1.00  0.00           C  
ATOM     51  C   THR A  14      19.378  15.012  30.565  1.00  0.00           C  
ATOM     52  O   THR A  14      19.516  14.140  29.710  1.00  0.00           O  
ATOM     53  N   LEU A  15      20.357  15.568  31.282  1.00  0.00           N  
ATOM     54  CA  LEU A  15      21.789  15.417  31.124  1.00  0.00           C  
ATOM     55  C   LEU A  15      22.496  15.037  32.418  1.00  0.00           C  
ATOM     56  O   LEU A  15      22.297  15.698  33.435  1.00  0.00           O  
ATOM     57  N   GLU A  16      23.334  13.997  32.406  1.00  0.00           N  
ATOM     58  CA  GLU A  16      24.092  13.606  33.577  1.00  0.00           C  
ATOM     59  C   GLU A  16      25.488  14.207  33.506  1.00  0.00           C  
ATOM     60  O   GLU A  16      26.226  13.924  32.565  1.00  0.00           O  
ATOM     61  N   VAL A  17      25.858  15.044  34.478  1.00  0.00           N  
ATOM     62  CA  VAL A  17      27.053  15.790  34.817  1.00  0.00           C  
ATOM     63  C   VAL A  17      27.552  15.637  36.247  1.00  0.00           C  
ATOM     64  O   VAL A  17      26.965  15.072  37.166  1.00  0.00           O  
ATOM     65  N   GLU A  18      28.758  16.177  36.436  1.00  0.00           N  
ATOM     66  CA  GLU A  18      29.527  16.257  37.662  1.00  0.00           C  
ATOM     67  C   GLU A  18      30.301  17.567  37.630  1.00  0.00           C  
ATOM     68  O   GLU A  18      30.492  18.179  36.582  1.00  0.00           O  
ATOM     69  N   PRO A  19      30.602  18.116  38.809  1.00  0.00           N  
ATOM     70  CA  PRO A  19      31.058  19.490  38.847  1.00  0.00           C  
ATOM     71  C   PRO A  19      32.346  19.787  38.094  1.00  0.00           C  
ATOM     72  O   PRO A  19      32.688  20.936  37.823  1.00  0.00           O  
ATOM     73  N   SER A  20      33.125  18.775  37.707  1.00  0.00           N  
ATOM     74  CA  SER A  20      34.297  18.701  36.859  1.00  0.00           C  
ATOM     75  C   SER A  20      34.131  19.019  35.380  1.00  0.00           C  
ATOM     76  O   SER A  20      35.109  19.435  34.761  1.00  0.00           O  
ATOM     77  N   ASP A  21      32.933  18.878  34.809  1.00  0.00           N  
ATOM     78  CA  ASP A  21      32.619  19.247  33.443  1.00  0.00           C  
ATOM     79  C   ASP A  21      32.932  20.725  33.260  1.00  0.00           C  
ATOM     80  O   ASP A  21      32.537  21.621  34.005  1.00  0.00           O  
ATOM     81  N   THR A  22      33.489  20.954  32.070  1.00  0.00           N  
ATOM     82  CA  THR A  22      33.425  22.238  31.400  1.00  0.00           C  
ATOM     83  C   THR A  22      32.058  22.522  30.792  1.00  0.00           C  
ATOM     84  O   THR A  22      31.311  21.602  30.467  1.00  0.00           O  
ATOM     85  N   ILE A  23      31.788  23.793  30.485  1.00  0.00           N  
ATOM     86  CA  ILE A  23      30.669  24.225  29.671  1.00  0.00           C  
ATOM     87  C   ILE A  23      30.778  23.560  28.307  1.00  0.00           C  
ATOM     88  O   ILE A  23      29.725  23.223  27.769  1.00  0.00           O  
ATOM     89  N   GLU A  24      31.895  23.208  27.666  1.00  0.00           N  
ATOM     90  CA  GLU A  24      31.862  22.505  26.400  1.00  0.00           C  
ATOM     91  C   GLU A  24      31.659  21.011  26.604  1.00  0.00           C  
ATOM     92  O   GLU A  24      31.266  20.348  25.647  1.00  0.00           O  
ATOM     93  N   ASN A  25      31.844  20.432  27.794  1.00  0.00           N  
ATOM     94  CA  ASN A  25      31.533  19.074  28.193  1.00  0.00           C  
ATOM     95  C   ASN A  25      30.066  18.965  28.581  1.00  0.00           C  
ATOM     96  O   ASN A  25      29.548  17.850  28.566  1.00  0.00           O  
ATOM     97  N   VAL A  26      29.299  19.980  28.987  1.00  0.00           N  
ATOM     98  CA  VAL A  26      27.890  19.942  28.652  1.00  0.00           C  
ATOM     99  C   VAL A  26      27.612  19.629  27.189  1.00  0.00           C  
ATOM    100  O   VAL A  26      26.877  18.704  26.847  1.00  0.00           O  
ATOM    101  N   LYS A  27      28.254  20.436  26.343  1.00  0.00           N  
ATOM    102  CA  LYS A  27      27.778  20.577  24.980  1.00  0.00           C  
ATOM    103  C   LYS A  27      28.032  19.344  24.124  1.00  0.00           C  
ATOM    104  O   LYS A  27      27.211  19.234  23.215  1.00  0.00           O  
ATOM    105  N   ALA A  28      29.038  18.485  24.302  1.00  0.00           N  
ATOM    106  CA  ALA A  28      28.970  17.239  23.566  1.00  0.00           C  
ATOM    107  C   ALA A  28      27.878  16.290  24.038  1.00  0.00           C  
ATOM    108  O   ALA A  28      27.424  15.478  23.235  1.00  0.00           O  
ATOM    109  N   LYS A  29      27.400  16.385  25.280  1.00  0.00           N  
ATOM    110  CA  LYS A  29      26.254  15.665  25.800  1.00  0.00           C  
ATOM    111  C   LYS A  29      24.965  16.178  25.175  1.00  0.00           C  
ATOM    112  O   LYS A  29      24.163  15.432  24.618  1.00  0.00           O  
ATOM    113  N   ILE A  30      24.762  17.498  25.191  1.00  0.00           N  
ATOM    114  CA  ILE A  30      23.716  18.174  24.449  1.00  0.00           C  
ATOM    115  C   ILE A  30      23.486  17.702  23.021  1.00  0.00           C  
ATOM    116  O   ILE A  30      22.365  17.402  22.618  1.00  0.00           O  
ATOM    117  N   GLN A  31      24.555  17.697  22.222  1.00  0.00           N  
ATOM    118  CA  GLN A  31      24.715  17.051  20.935  1.00  0.00           C  
ATOM    119  C   GLN A  31      24.204  15.617  20.917  1.00  0.00           C  
ATOM    120  O   GLN A  31      23.427  15.289  20.024  1.00  0.00           O  
ATOM    121  N   ASP A  32      24.711  14.752  21.799  1.00  0.00           N  
ATOM    122  CA  ASP A  32      24.456  13.328  21.876  1.00  0.00           C  
ATOM    123  C   ASP A  32      22.972  13.016  22.014  1.00  0.00           C  
ATOM    124  O   ASP A  32      22.529  12.002  21.480  1.00  0.00           O  
ATOM    125  N   LYS A  33      22.227  13.793  22.802  1.00  0.00           N  
ATOM    126  CA  LYS A  33      20.779  13.757  22.765  1.00  0.00           C  
ATOM    127  C   LYS A  33      20.132  14.416  21.555  1.00  0.00           C  
ATOM    128  O   LYS A  33      19.264  13.809  20.931  1.00  0.00           O  
ATOM    129  N   GLU A  34      20.477  15.630  21.123  1.00  0.00           N  
ATOM    130  CA  GLU A  34      19.688  16.545  20.322  1.00  0.00           C  
ATOM    131  C   GLU A  34      20.254  16.830  18.938  1.00  0.00           C  
ATOM    132  O   GLU A  34      19.558  17.515  18.192  1.00  0.00           O  
ATOM    133  N   GLY A  35      21.455  16.357  18.597  1.00  0.00           N  
ATOM    134  CA  GLY A  35      22.029  16.652  17.299  1.00  0.00           C  
ATOM    135  C   GLY A  35      22.316  18.123  17.031  1.00  0.00           C  
ATOM    136  O   GLY A  35      22.611  18.394  15.869  1.00  0.00           O  
ATOM    137  N   ILE A  36      22.378  19.057  17.984  1.00  0.00           N  
ATOM    138  CA  ILE A  36      22.907  20.391  17.789  1.00  0.00           C  
ATOM    139  C   ILE A  36      24.368  20.502  18.202  1.00  0.00           C  
ATOM    140  O   ILE A  36      24.773  20.214  19.326  1.00  0.00           O  
ATOM    141  N   PRO A  37      25.204  20.932  17.254  1.00  0.00           N  
ATOM    142  CA  PRO A  37      26.642  20.809  17.377  1.00  0.00           C  
ATOM    143  C   PRO A  37      27.204  21.940  18.226  1.00  0.00           C  
ATOM    144  O   PRO A  37      26.689  23.052  18.130  1.00  0.00           O  
ATOM    145  N   PRO A  38      28.293  21.822  18.989  1.00  0.00           N  
ATOM    146  CA  PRO A  38      28.665  22.720  20.064  1.00  0.00           C  
ATOM    147  C   PRO A  38      28.760  24.187  19.673  1.00  0.00           C  
ATOM    148  O   PRO A  38      28.144  25.026  20.327  1.00  0.00           O  
ATOM    149  N   ASP A  39      29.371  24.523  18.535  1.00  0.00           N  
ATOM    150  CA  ASP A  39      29.357  25.853  17.960  1.00  0.00           C  
ATOM    151  C   ASP A  39      28.020  26.582  17.968  1.00  0.00           C  
ATOM    152  O   ASP A  39      27.895  27.750  18.327  1.00  0.00           O  
ATOM    153  N   GLN A  40      26.930  25.888  17.633  1.00  0.00           N  
ATOM    154  CA  GLN A  40      25.604  26.446  17.464  1.00  0.00           C  
ATOM    155  C   GLN A  40      24.966  26.861  18.782  1.00  0.00           C  
ATOM    156  O   GLN A  40      24.011  27.633  18.821  1.00  0.00           O  
ATOM    157  N   GLN A  41      25.268  26.163  19.881  1.00  0.00           N  
ATOM    158  CA  GLN A  41      24.756  26.245  21.234  1.00  0.00           C  
ATOM    159  C   GLN A  41      25.287  27.442  22.009  1.00  0.00           C  
ATOM    160  O   GLN A  41      26.487  27.616  22.208  1.00  0.00           O  
ATOM    161  N   ARG A  42      24.355  28.328  22.369  1.00  0.00           N  
ATOM    162  CA  ARG A  42      24.589  29.424  23.287  1.00  0.00           C  
ATOM    163  C   ARG A  42      24.036  29.042  24.652  1.00  0.00           C  
ATOM    164  O   ARG A  42      22.815  28.908  24.704  1.00  0.00           O  
ATOM    165  N   LEU A  43      24.905  29.036  25.666  1.00  0.00           N  
ATOM    166  CA  LEU A  43      24.506  28.737  27.026  1.00  0.00           C  
ATOM    167  C   LEU A  43      24.331  30.042  27.790  1.00  0.00           C  
ATOM    168  O   LEU A  43      25.205  30.903  27.717  1.00  0.00           O  
ATOM    169  N   ILE A  44      23.144  30.180  28.385  1.00  0.00           N  
ATOM    170  CA  ILE A  44      22.683  31.351  29.103  1.00  0.00           C  
ATOM    171  C   ILE A  44      22.358  31.132  30.574  1.00  0.00           C  
ATOM    172  O   ILE A  44      21.697  30.145  30.886  1.00  0.00           O  
ATOM    173  N   PHE A  45      22.950  31.934  31.462  1.00  0.00           N  
ATOM    174  CA  PHE A  45      22.620  32.156  32.855  1.00  0.00           C  
ATOM    175  C   PHE A  45      22.838  33.579  33.350  1.00  0.00           C  
ATOM    176  O   PHE A  45      23.686  34.275  32.799  1.00  0.00           O  
ATOM    177  N   ALA A  46      22.067  34.049  34.332  1.00  0.00           N  
ATOM    178  CA  ALA A  46      22.254  35.348  34.945  1.00  0.00           C  
ATOM    179  C   ALA A  46      22.588  36.509  34.019  1.00  0.00           C  
ATOM    180  O   ALA A  46      23.433  37.335  34.352  1.00  0.00           O  
ATOM    181  N   GLY A  47      21.993  36.567  32.826  1.00  0.00           N  
ATOM    182  CA  GLY A  47      22.051  37.656  31.871  1.00  0.00           C  
ATOM    183  C   GLY A  47      23.382  37.699  31.134  1.00  0.00           C  
ATOM    184  O   GLY A  47      23.758  38.744  30.608  1.00  0.00           O  
ATOM    185  N   LYS A  48      24.162  36.618  31.180  1.00  0.00           N  
ATOM    186  CA  LYS A  48      25.445  36.385  30.547  1.00  0.00           C  
ATOM    187  C   LYS A  48      25.753  35.048  29.887  1.00  0.00           C  
ATOM    188  O   LYS A  48      25.051  34.045  29.996  1.00  0.00           O  
ATOM    189  N   GLN A  49      26.664  35.127  28.916  1.00  0.00           N  
ATOM    190  CA  GLN A  49      27.007  33.970  28.115  1.00  0.00           C  
ATOM    191  C   GLN A  49      28.185  33.144  28.611  1.00  0.00           C  
ATOM    192  O   GLN A  49      29.172  33.727  29.054  1.00  0.00           O  
ATOM    193  N   LEU A  50      28.125  31.811  28.636  1.00  0.00           N  
ATOM    194  CA  LEU A  50      28.952  31.014  29.520  1.00  0.00           C  
ATOM    195  C   LEU A  50      30.184  30.422  28.852  1.00  0.00           C  
ATOM    196  O   LEU A  50      30.011  29.681  27.887  1.00  0.00           O  
ATOM    197  N   GLU A  51      31.380  30.614  29.415  1.00  0.00           N  
ATOM    198  CA  GLU A  51      32.622  30.337  28.722  1.00  0.00           C  
ATOM    199  C   GLU A  51      32.839  28.868  28.388  1.00  0.00           C  
ATOM    200  O   GLU A  51      32.885  28.143  29.380  1.00  0.00           O  
ATOM    201  N   ASP A  52      33.160  28.437  27.166  1.00  0.00           N  
ATOM    202  CA  ASP A  52      33.429  27.045  26.860  1.00  0.00           C  
ATOM    203  C   ASP A  52      34.477  26.334  27.703  1.00  0.00           C  
ATOM    204  O   ASP A  52      34.164  25.293  28.277  1.00  0.00           O  
ATOM    205  N   GLY A  53      35.704  26.837  27.868  1.00  0.00           N  
ATOM    206  CA  GLY A  53      36.745  26.198  28.648  1.00  0.00           C  
ATOM    207  C   GLY A  53      36.601  26.179  30.164  1.00  0.00           C  
ATOM    208  O   GLY A  53      37.238  25.444  30.914  1.00  0.00           O  
ATOM    209  N   ARG A  54      35.641  26.958  30.668  1.00  0.00           N  
ATOM    210  CA  ARG A  54      35.206  27.023  32.049  1.00  0.00           C  
ATOM    211  C   ARG A  54      34.210  26.017  32.608  1.00  0.00           C  
ATOM    212  O   ARG A  54      33.355  25.487  31.901  1.00  0.00           O  
ATOM    213  N   THR A  55      34.255  25.664  33.894  1.00  0.00           N  
ATOM    214  CA  THR A  55      33.581  24.561  34.549  1.00  0.00           C  
ATOM    215  C   THR A  55      32.440  25.011  35.450  1.00  0.00           C  
ATOM    216  O   THR A  55      32.367  26.122  35.971  1.00  0.00           O  
ATOM    217  N   LEU A  56      31.533  24.058  35.675  1.00  0.00           N  
ATOM    218  CA  LEU A  56      30.220  24.026  36.290  1.00  0.00           C  
ATOM    219  C   LEU A  56      30.340  24.548  37.714  1.00  0.00           C  
ATOM    220  O   LEU A  56      29.560  25.400  38.132  1.00  0.00           O  
ATOM    221  N   SER A  57      31.226  24.019  38.562  1.00  0.00           N  
ATOM    222  CA  SER A  57      31.550  24.488  39.894  1.00  0.00           C  
ATOM    223  C   SER A  57      31.888  25.973  39.911  1.00  0.00           C  
ATOM    224  O   SER A  57      31.250  26.639  40.724  1.00  0.00           O  
ATOM    225  N   ASP A  58      32.709  26.582  39.055  1.00  0.00           N  
ATOM    226  CA  ASP A  58      33.011  27.999  39.028  1.00  0.00           C  
ATOM    227  C   ASP A  58      31.765  28.852  38.834  1.00  0.00           C  
ATOM    228  O   ASP A  58      31.556  29.866  39.497  1.00  0.00           O  
ATOM    229  N   TYR A  59      30.740  28.445  38.083  1.00  0.00           N  
ATOM    230  CA  TYR A  59      29.489  29.159  37.929  1.00  0.00           C  
ATOM    231  C   TYR A  59      28.483  28.830  39.022  1.00  0.00           C  
ATOM    232  O   TYR A  59      27.357  29.315  38.941  1.00  0.00           O  
ATOM    233  N   ASN A  60      28.829  28.099  40.085  1.00  0.00           N  
ATOM    234  CA  ASN A  60      27.928  27.548  41.078  1.00  0.00           C  
ATOM    235  C   ASN A  60      26.963  26.438  40.690  1.00  0.00           C  
ATOM    236  O   ASN A  60      25.973  26.265  41.397  1.00  0.00           O  
ATOM    237  N   ILE A  61      27.111  25.749  39.556  1.00  0.00           N  
ATOM    238  CA  ILE A  61      26.113  24.806  39.097  1.00  0.00           C  
ATOM    239  C   ILE A  61      26.045  23.714  40.155  1.00  0.00           C  
ATOM    240  O   ILE A  61      27.069  23.075  40.387  1.00  0.00           O  
ATOM    241  N   GLN A  62      24.881  23.471  40.762  1.00  0.00           N  
ATOM    242  CA  GLN A  62      24.622  22.467  41.775  1.00  0.00           C  
ATOM    243  C   GLN A  62      23.606  21.519  41.155  1.00  0.00           C  
ATOM    244  O   GLN A  62      23.340  21.578  39.957  1.00  0.00           O  
ATOM    245  N   LYS A  63      23.178  20.587  42.010  1.00  0.00           N  
ATOM    246  CA  LYS A  63      22.118  19.676  41.626  1.00  0.00           C  
ATOM    247  C   LYS A  63      20.804  20.346  41.254  1.00  0.00           C  
ATOM    248  O   LYS A  63      20.415  21.296  41.930  1.00  0.00           O  
ATOM    249  N   GLU A  64      20.204  19.826  40.180  1.00  0.00           N  
ATOM    250  CA  GLU A  64      18.912  20.123  39.595  1.00  0.00           C  
ATOM    251  C   GLU A  64      18.787  21.550  39.078  1.00  0.00           C  
ATOM    252  O   GLU A  64      17.699  22.092  38.897  1.00  0.00           O  
ATOM    253  N   SER A  65      19.913  22.207  38.794  1.00  0.00           N  
ATOM    254  CA  SER A  65      19.968  23.504  38.151  1.00  0.00           C  
ATOM    255  C   SER A  65      19.508  23.542  36.700  1.00  0.00           C  
ATOM    256  O   SER A  65      19.674  22.573  35.964  1.00  0.00           O  
ATOM    257  N   THR A  66      18.966  24.644  36.177  1.00  0.00           N  
ATOM    258  CA  THR A  66      18.460  24.759  34.824  1.00  0.00           C  
ATOM    259  C   THR A  66      19.325  25.672  33.966  1.00  0.00           C  
ATOM    260  O   THR A  66      19.481  26.837  34.324  1.00  0.00           O  
ATOM    261  N   LEU A  67      19.803  25.091  32.863  1.00  0.00           N  
ATOM    262  CA  LEU A  67      20.390  25.922  31.830  1.00  0.00           C  
ATOM    263  C   LEU A  67      19.447  26.277  30.689  1.00  0.00           C  
ATOM    264  O   LEU A  67      18.564  25.503  30.325  1.00  0.00           O  
ATOM    265  N   HIS A  68      19.671  27.371  29.958  1.00  0.00           N  
ATOM    266  CA  HIS A  68      18.951  27.859  28.799  1.00  0.00           C  
ATOM    267  C   HIS A  68      19.497  27.231  27.524  1.00  0.00           C  
ATOM    268  O   HIS A  68      20.616  26.723  27.509  1.00  0.00           O  
ATOM    269  N   LEU A  69      18.885  27.542  26.379  1.00  0.00           N  
ATOM    270  CA  LEU A  69      19.560  27.286  25.123  1.00  0.00           C  
ATOM    271  C   LEU A  69      18.833  28.212  24.158  1.00  0.00           C  
ATOM    272  O   LEU A  69      17.666  27.998  23.835  1.00  0.00           O  
ATOM    273  N   VAL A  70      19.600  29.086  23.503  1.00  0.00           N  
ATOM    274  CA  VAL A  70      19.200  29.778  22.294  1.00  0.00           C  
ATOM    275  C   VAL A  70      19.829  29.078  21.097  1.00  0.00           C  
ATOM    276  O   VAL A  70      21.019  28.774  21.071  1.00  0.00           O  
TER
ENDMDL
MODEL      6
ATOM      1  N   GLN A   2      21.863  15.280  38.077  1.00  0.00           N  
ATOM      2  CA  GLN A   2      21.256  16.008  36.982  1.00  0.00           C  
ATOM      3  C   GLN A   2      21.365  17.526  36.964  1.00  0.00           C  
ATOM      4  O   GLN A   2      21.506  18.198  37.982  1.00  0.00           O  
ATOM      5  N   ILE A   3      21.490  18.107  35.768  1.00  0.00           N  
ATOM      6  CA  ILE A   3      21.180  19.447  35.310  1.00  0.00           C  
ATOM      7  C   ILE A   3      20.188  19.394  34.158  1.00  0.00           C  
ATOM      8  O   ILE A   3      19.904  18.393  33.503  1.00  0.00           O  
ATOM      9  N   PHE A   4      19.371  20.447  34.070  1.00  0.00           N  
ATOM     10  CA  PHE A   4      18.449  20.533  32.956  1.00  0.00           C  
ATOM     11  C   PHE A   4      18.975  21.429  31.844  1.00  0.00           C  
ATOM     12  O   PHE A   4      19.468  22.514  32.147  1.00  0.00           O  
ATOM     13  N   VAL A   5      18.636  21.198  30.575  1.00  0.00           N  
ATOM     14  CA  VAL A   5      18.500  22.241  29.578  1.00  0.00           C  
ATOM     15  C   VAL A   5      17.073  22.367  29.062  1.00  0.00           C  
ATOM     16  O   VAL A   5      16.455  21.436  28.551  1.00  0.00           O  
ATOM     17  N   LYS A   6      16.458  23.550  29.133  1.00  0.00           N  
ATOM     18  CA  LYS A   6      15.307  24.055  28.412  1.00  0.00           C  
ATOM     19  C   LYS A   6      15.576  24.773  27.098  1.00  0.00           C  
ATOM     20  O   LYS A   6      16.178  25.844  27.067  1.00  0.00           O  
ATOM     21  N   THR A   7      14.987  24.216  26.037  1.00  0.00           N  
ATOM     22  CA  THR A   7      15.017  24.915  24.768  1.00  0.00           C  
ATOM     23  C   THR A   7      14.161  26.166  24.630  1.00  0.00           C  
ATOM     24  O   THR A   7      13.264  26.280  25.462  1.00  0.00           O  
ATOM     25  N   LEU A   8      14.258  26.930  23.539  1.00  0.00           N  
ATOM     26  CA  LEU A   8      13.485  28.112  23.217  1.00  0.00           C  
ATOM     27  C   LEU A   8      12.027  27.751  22.978  1.00  0.00           C  
ATOM     28  O   LEU A   8      11.089  28.493  23.258  1.00  0.00           O  
ATOM     29  N   THR A   9      11.896  26.519  22.478  1.00  0.00           N  
ATOM     30  CA  THR A   9      10.637  25.868  22.177  1.00  0.00           C  
ATOM     31  C   THR A   9      10.026  25.099  23.339  1.00  0.00           C  
ATOM     32  O   THR A   9       8.890  24.640  23.236  1.00  0.00           O  
ATOM     33  N   GLY A  10      10.781  24.793  24.397  1.00  0.00           N  
ATOM     34  CA  GLY A  10      10.122  24.389  25.622  1.00  0.00           C  
ATOM     35  C   GLY A  10      10.156  22.892  25.894  1.00  0.00           C  
ATOM     36  O   GLY A  10       9.336  22.444  26.692  1.00  0.00           O  
ATOM     37  N   LYS A  11      11.100  22.187  25.267  1.00  0.00           N  
ATOM     38  CA  LYS A  11      11.629  20.884  25.618  1.00  0.00           C  
ATOM     39  C   LYS A  11      12.341  20.985  26.959  1.00  0.00           C  
ATOM     40  O   LYS A  11      12.892  22.028  27.304  1.00  0.00           O  
ATOM     41  N   THR A  12      12.232  19.972  27.821  1.00  0.00           N  
ATOM     42  CA  THR A  12      13.249  19.699  28.817  1.00  0.00           C  
ATOM     43  C   THR A  12      14.190  18.579  28.395  1.00  0.00           C  
ATOM     44  O   THR A  12      13.693  17.606  27.832  1.00  0.00           O  
ATOM     45  N   ILE A  13      15.485  18.756  28.668  1.00  0.00           N  
ATOM     46  CA  ILE A  13      16.547  17.855  28.267  1.00  0.00           C  
ATOM     47  C   ILE A  13      17.354  17.426  29.483  1.00  0.00           C  
ATOM     48  O   ILE A  13      17.984  18.339  30.011  1.00  0.00           O  
ATOM     49  N   THR A  14      17.382  16.152  29.885  1.00  0.00           N  
ATOM     50  CA  THR A  14      18.233  15.813  31.007  1.00  0.00           C  
ATOM     51  C   THR A  14      19.649  15.448  30.587  1.00  0.00           C  
ATOM     52  O   THR A  14      19.853  14.603  29.717  1.00  0.00           O  
ATOM     53  N   LEU A  15      20.592  16.165  31.202  1.00  0.00           N  
ATOM     54  CA  LEU A  15      22.019  15.917  31.211  1.00  0.00           C  
ATOM     55  C   LEU A  15      22.478  15.383  32.560  1.00  0.00           C  
ATOM     56  O   LEU A  15      22.064  15.942  33.574  1.00  0.00           O  
ATOM     57  N   GLU A  16      23.317  14.346  32.593  1.00  0.00           N  
ATOM     58  CA  GLU A  16      23.997  14.090  33.846  1.00  0.00           C  
ATOM     59  C   GLU A  16      25.455  14.520  33.776  1.00  0.00           C  
ATOM     60  O   GLU A  16      26.173  14.195  32.833  1.00  0.00           O  
ATOM     61  N   VAL A  17      25.817  15.260  34.827  1.00  0.00           N  
ATOM     62  CA  VAL A  17      27.117  15.856  35.061  1.00  0.00           C  
ATOM     63  C   VAL A  17      27.711  15.721  36.455  1.00  0.00           C  
ATOM     64  O   VAL A  17      27.007  15.328  37.384  1.00  0.00           O  
ATOM     65  N   GLU A  18      28.967  16.134  36.644  1.00  0.00           N  
ATOM     66  CA  GLU A  18      29.491  16.355  37.977  1.00  0.00           C  
ATOM     67  C   GLU A  18      30.211  17.695  38.031  1.00  0.00           C  
ATOM     68  O   GLU A  18      30.425  18.226  36.944  1.00  0.00           O  
ATOM     69  N   PRO A  19      30.423  18.297  39.204  1.00  0.00           N  
ATOM     70  CA  PRO A  19      31.012  19.621  39.227  1.00  0.00           C  
ATOM     71  C   PRO A  19      32.251  19.884  38.384  1.00  0.00           C  
ATOM     72  O   PRO A  19      32.395  21.025  37.953  1.00  0.00           O  
ATOM     73  N   SER A  20      33.076  18.912  37.985  1.00  0.00           N  
ATOM     74  CA  SER A  20      34.280  18.973  37.182  1.00  0.00           C  
ATOM     75  C   SER A  20      34.067  18.950  35.675  1.00  0.00           C  
ATOM     76  O   SER A  20      35.043  19.332  35.034  1.00  0.00           O  
ATOM     77  N   ASP A  21      32.917  18.702  35.044  1.00  0.00           N  
ATOM     78  CA  ASP A  21      32.704  18.823  33.616  1.00  0.00           C  
ATOM     79  C   ASP A  21      33.031  20.241  33.170  1.00  0.00           C  
ATOM     80  O   ASP A  21      32.673  21.223  33.816  1.00  0.00           O  
ATOM     81  N   THR A  22      33.659  20.343  31.997  1.00  0.00           N  
ATOM     82  CA  THR A  22      33.852  21.592  31.288  1.00  0.00           C  
ATOM     83  C   THR A  22      32.680  22.060  30.437  1.00  0.00           C  
ATOM     84  O   THR A  22      31.945  21.235  29.899  1.00  0.00           O  
ATOM     85  N   ILE A  23      32.606  23.349  30.098  1.00  0.00           N  
ATOM     86  CA  ILE A  23      31.524  23.749  29.222  1.00  0.00           C  
ATOM     87  C   ILE A  23      31.493  23.132  27.831  1.00  0.00           C  
ATOM     88  O   ILE A  23      30.395  22.799  27.389  1.00  0.00           O  
ATOM     89  N   GLU A  24      32.664  22.870  27.244  1.00  0.00           N  
ATOM     90  CA  GLU A  24      32.857  22.103  26.031  1.00  0.00           C  
ATOM     91  C   GLU A  24      32.176  20.742  26.034  1.00  0.00           C  
ATOM     92  O   GLU A  24      31.502  20.322  25.096  1.00  0.00           O  
ATOM     93  N   ASN A  25      32.340  20.057  27.168  1.00  0.00           N  
ATOM     94  CA  ASN A  25      31.979  18.693  27.502  1.00  0.00           C  
ATOM     95  C   ASN A  25      30.485  18.673  27.789  1.00  0.00           C  
ATOM     96  O   ASN A  25      29.809  17.793  27.260  1.00  0.00           O  
ATOM     97  N   VAL A  26      29.888  19.648  28.480  1.00  0.00           N  
ATOM     98  CA  VAL A  26      28.449  19.677  28.642  1.00  0.00           C  
ATOM     99  C   VAL A  26      27.715  20.214  27.421  1.00  0.00           C  
ATOM    100  O   VAL A  26      26.792  19.514  27.010  1.00  0.00           O  
ATOM    101  N   LYS A  27      28.164  21.174  26.609  1.00  0.00           N  
ATOM    102  CA  LYS A  27      27.682  21.346  25.254  1.00  0.00           C  
ATOM    103  C   LYS A  27      27.832  20.089  24.409  1.00  0.00           C  
ATOM    104  O   LYS A  27      26.864  19.725  23.745  1.00  0.00           O  
ATOM    105  N   ALA A  28      28.933  19.334  24.426  1.00  0.00           N  
ATOM    106  CA  ALA A  28      28.954  18.061  23.736  1.00  0.00           C  
ATOM    107  C   ALA A  28      28.095  17.016  24.434  1.00  0.00           C  
ATOM    108  O   ALA A  28      27.627  16.144  23.704  1.00  0.00           O  
ATOM    109  N   LYS A  29      27.691  16.984  25.705  1.00  0.00           N  
ATOM    110  CA  LYS A  29      26.555  16.209  26.161  1.00  0.00           C  
ATOM    111  C   LYS A  29      25.268  16.730  25.537  1.00  0.00           C  
ATOM    112  O   LYS A  29      24.388  15.934  25.218  1.00  0.00           O  
ATOM    113  N   ILE A  30      24.914  18.010  25.395  1.00  0.00           N  
ATOM    114  CA  ILE A  30      23.774  18.437  24.610  1.00  0.00           C  
ATOM    115  C   ILE A  30      23.659  17.806  23.229  1.00  0.00           C  
ATOM    116  O   ILE A  30      22.607  17.323  22.818  1.00  0.00           O  
ATOM    117  N   GLN A  31      24.776  17.618  22.523  1.00  0.00           N  
ATOM    118  CA  GLN A  31      24.842  16.977  21.226  1.00  0.00           C  
ATOM    119  C   GLN A  31      24.662  15.466  21.251  1.00  0.00           C  
ATOM    120  O   GLN A  31      24.305  14.924  20.207  1.00  0.00           O  
ATOM    121  N   ASP A  32      24.843  14.743  22.358  1.00  0.00           N  
ATOM    122  CA  ASP A  32      24.471  13.361  22.587  1.00  0.00           C  
ATOM    123  C   ASP A  32      22.955  13.224  22.608  1.00  0.00           C  
ATOM    124  O   ASP A  32      22.377  12.353  21.963  1.00  0.00           O  
ATOM    125  N   LYS A  33      22.276  14.171  23.261  1.00  0.00           N  
ATOM    126  CA  LYS A  33      20.843  14.216  23.465  1.00  0.00           C  
ATOM    127  C   LYS A  33      20.004  14.595  22.252  1.00  0.00           C  
ATOM    128  O   LYS A  33      18.939  14.064  21.946  1.00  0.00           O  
ATOM    129  N   GLU A  34      20.524  15.574  21.510  1.00  0.00           N  
ATOM    130  CA  GLU A  34      19.843  16.512  20.639  1.00  0.00           C  
ATOM    131  C   GLU A  34      20.522  16.898  19.332  1.00  0.00           C  
ATOM    132  O   GLU A  34      19.890  17.424  18.419  1.00  0.00           O  
ATOM    133  N   GLY A  35      21.826  16.681  19.147  1.00  0.00           N  
ATOM    134  CA  GLY A  35      22.526  16.719  17.879  1.00  0.00           C  
ATOM    135  C   GLY A  35      22.625  18.055  17.157  1.00  0.00           C  
ATOM    136  O   GLY A  35      23.203  18.148  16.076  1.00  0.00           O  
ATOM    137  N   ILE A  36      22.280  19.178  17.790  1.00  0.00           N  
ATOM    138  CA  ILE A  36      22.642  20.544  17.472  1.00  0.00           C  
ATOM    139  C   ILE A  36      24.077  20.660  17.963  1.00  0.00           C  
ATOM    140  O   ILE A  36      24.417  20.312  19.093  1.00  0.00           O  
ATOM    141  N   PRO A  37      24.974  21.130  17.094  1.00  0.00           N  
ATOM    142  CA  PRO A  37      26.409  21.160  17.295  1.00  0.00           C  
ATOM    143  C   PRO A  37      26.793  22.214  18.323  1.00  0.00           C  
ATOM    144  O   PRO A  37      26.087  23.182  18.599  1.00  0.00           O  
ATOM    145  N   PRO A  38      28.015  22.070  18.842  1.00  0.00           N  
ATOM    146  CA  PRO A  38      28.547  23.014  19.804  1.00  0.00           C  
ATOM    147  C   PRO A  38      28.705  24.408  19.212  1.00  0.00           C  
ATOM    148  O   PRO A  38      28.624  25.356  19.990  1.00  0.00           O  
ATOM    149  N   ASP A  39      28.757  24.633  17.897  1.00  0.00           N  
ATOM    150  CA  ASP A  39      28.744  25.918  17.227  1.00  0.00           C  
ATOM    151  C   ASP A  39      27.409  26.648  17.273  1.00  0.00           C  
ATOM    152  O   ASP A  39      27.433  27.876  17.333  1.00  0.00           O  
ATOM    153  N   GLN A  40      26.303  25.904  17.339  1.00  0.00           N  
ATOM    154  CA  GLN A  40      24.984  26.501  17.274  1.00  0.00           C  
ATOM    155  C   GLN A  40      24.477  26.814  18.674  1.00  0.00           C  
ATOM    156  O   GLN A  40      23.679  27.734  18.835  1.00  0.00           O  
ATOM    157  N   GLN A  41      24.842  26.156  19.778  1.00  0.00           N  
ATOM    158  CA  GLN A  41      24.429  26.364  21.151  1.00  0.00           C  
ATOM    159  C   GLN A  41      24.879  27.701  21.721  1.00  0.00           C  
ATOM    160  O   GLN A  41      26.072  27.940  21.900  1.00  0.00           O  
ATOM    161  N   ARG A  42      23.949  28.567  22.129  1.00  0.00           N  
ATOM    162  CA  ARG A  42      24.058  29.594  23.146  1.00  0.00           C  
ATOM    163  C   ARG A  42      23.505  29.173  24.499  1.00  0.00           C  
ATOM    164  O   ARG A  42      22.287  29.259  24.634  1.00  0.00           O  
ATOM    165  N   LEU A  43      24.230  28.725  25.527  1.00  0.00           N  
ATOM    166  CA  LEU A  43      23.846  28.118  26.785  1.00  0.00           C  
ATOM    167  C   LEU A  43      24.115  29.056  27.953  1.00  0.00           C  
ATOM    168  O   LEU A  43      25.220  29.556  28.151  1.00  0.00           O  
ATOM    169  N   ILE A  44      23.014  29.612  28.462  1.00  0.00           N  
ATOM    170  CA  ILE A  44      22.925  30.641  29.479  1.00  0.00           C  
ATOM    171  C   ILE A  44      22.011  30.460  30.683  1.00  0.00           C  
ATOM    172  O   ILE A  44      20.957  29.827  30.648  1.00  0.00           O  
ATOM    173  N   PHE A  45      22.637  30.817  31.806  1.00  0.00           N  
ATOM    174  CA  PHE A  45      22.215  30.695  33.187  1.00  0.00           C  
ATOM    175  C   PHE A  45      22.606  31.823  34.131  1.00  0.00           C  
ATOM    176  O   PHE A  45      23.709  32.366  34.142  1.00  0.00           O  
ATOM    177  N   ALA A  46      21.620  32.074  34.995  1.00  0.00           N  
ATOM    178  CA  ALA A  46      21.623  33.296  35.773  1.00  0.00           C  
ATOM    179  C   ALA A  46      21.959  34.563  34.999  1.00  0.00           C  
ATOM    180  O   ALA A  46      22.868  35.296  35.382  1.00  0.00           O  
ATOM    181  N   GLY A  47      21.382  34.677  33.800  1.00  0.00           N  
ATOM    182  CA  GLY A  47      21.616  35.718  32.820  1.00  0.00           C  
ATOM    183  C   GLY A  47      22.997  35.742  32.182  1.00  0.00           C  
ATOM    184  O   GLY A  47      23.305  36.650  31.413  1.00  0.00           O  
ATOM    185  N   LYS A  48      23.815  34.700  32.355  1.00  0.00           N  
ATOM    186  CA  LYS A  48      25.207  34.713  31.954  1.00  0.00           C  
ATOM    187  C   LYS A  48      25.708  33.626  31.013  1.00  0.00           C  
ATOM    188  O   LYS A  48      25.313  32.464  30.933  1.00  0.00           O  
ATOM    189  N   GLN A  49      26.590  34.164  30.169  1.00  0.00           N  
ATOM    190  CA  GLN A  49      27.207  33.486  29.047  1.00  0.00           C  
ATOM    191  C   GLN A  49      28.264  32.489  29.502  1.00  0.00           C  
ATOM    192  O   GLN A  49      29.236  32.857  30.157  1.00  0.00           O  
ATOM    193  N   LEU A  50      28.024  31.211  29.199  1.00  0.00           N  
ATOM    194  CA  LEU A  50      28.856  30.104  29.626  1.00  0.00           C  
ATOM    195  C   LEU A  50      30.084  30.022  28.732  1.00  0.00           C  
ATOM    196  O   LEU A  50      29.891  29.474  27.650  1.00  0.00           O  
ATOM    197  N   GLU A  51      31.326  30.290  29.144  1.00  0.00           N  
ATOM    198  CA  GLU A  51      32.510  30.145  28.323  1.00  0.00           C  
ATOM    199  C   GLU A  51      33.102  28.751  28.174  1.00  0.00           C  
ATOM    200  O   GLU A  51      33.273  28.062  29.177  1.00  0.00           O  
ATOM    201  N   ASP A  52      33.613  28.375  26.999  1.00  0.00           N  
ATOM    202  CA  ASP A  52      33.720  26.971  26.657  1.00  0.00           C  
ATOM    203  C   ASP A  52      34.698  26.099  27.431  1.00  0.00           C  
ATOM    204  O   ASP A  52      34.260  25.082  27.966  1.00  0.00           O  
ATOM    205  N   GLY A  53      35.939  26.484  27.736  1.00  0.00           N  
ATOM    206  CA  GLY A  53      36.778  25.904  28.765  1.00  0.00           C  
ATOM    207  C   GLY A  53      36.475  26.057  30.248  1.00  0.00           C  
ATOM    208  O   GLY A  53      37.317  25.638  31.038  1.00  0.00           O  
ATOM    209  N   ARG A  54      35.409  26.747  30.665  1.00  0.00           N  
ATOM    210  CA  ARG A  54      35.115  26.863  32.079  1.00  0.00           C  
ATOM    211  C   ARG A  54      34.346  25.667  32.622  1.00  0.00           C  
ATOM    212  O   ARG A  54      33.656  24.938  31.913  1.00  0.00           O  
ATOM    213  N   THR A  55      34.589  25.292  33.880  1.00  0.00           N  
ATOM    214  CA  THR A  55      33.780  24.269  34.511  1.00  0.00           C  
ATOM    215  C   THR A  55      32.451  24.830  34.995  1.00  0.00           C  
ATOM    216  O   THR A  55      32.240  26.015  35.247  1.00  0.00           O  
ATOM    217  N   LEU A  56      31.549  23.887  35.273  1.00  0.00           N  
ATOM    218  CA  LEU A  56      30.383  24.054  36.116  1.00  0.00           C  
ATOM    219  C   LEU A  56      30.673  24.693  37.466  1.00  0.00           C  
ATOM    220  O   LEU A  56      29.867  25.529  37.867  1.00  0.00           O  
ATOM    221  N   SER A  57      31.797  24.365  38.108  1.00  0.00           N  
ATOM    222  CA  SER A  57      32.172  24.981  39.364  1.00  0.00           C  
ATOM    223  C   SER A  57      32.593  26.443  39.366  1.00  0.00           C  
ATOM    224  O   SER A  57      32.311  27.091  40.371  1.00  0.00           O  
ATOM    225  N   ASP A  58      32.989  27.017  38.227  1.00  0.00           N  
ATOM    226  CA  ASP A  58      33.215  28.437  38.046  1.00  0.00           C  
ATOM    227  C   ASP A  58      31.954  29.244  38.324  1.00  0.00           C  
ATOM    228  O   ASP A  58      31.932  30.363  38.832  1.00  0.00           O  
ATOM    229  N   TYR A  59      30.828  28.748  37.805  1.00  0.00           N  
ATOM    230  CA  TYR A  59      29.572  29.455  37.653  1.00  0.00           C  
ATOM    231  C   TYR A  59      28.684  29.241  38.870  1.00  0.00           C  
ATOM    232  O   TYR A  59      27.604  29.828  38.857  1.00  0.00           O  
ATOM    233  N   ASN A  60      29.011  28.328  39.787  1.00  0.00           N  
ATOM    234  CA  ASN A  60      28.013  27.800  40.695  1.00  0.00           C  
ATOM    235  C   ASN A  60      26.753  27.269  40.026  1.00  0.00           C  
ATOM    236  O   ASN A  60      25.653  27.600  40.461  1.00  0.00           O  
ATOM    237  N   ILE A  61      26.954  26.319  39.109  1.00  0.00           N  
ATOM    238  CA  ILE A  61      25.908  25.436  38.634  1.00  0.00           C  
ATOM    239  C   ILE A  61      25.780  24.331  39.672  1.00  0.00           C  
ATOM    240  O   ILE A  61      26.642  23.454  39.689  1.00  0.00           O  
ATOM    241  N   GLN A  62      24.820  24.304  40.597  1.00  0.00           N  
ATOM    242  CA  GLN A  62      24.589  23.234  41.549  1.00  0.00           C  
ATOM    243  C   GLN A  62      23.535  22.300  40.973  1.00  0.00           C  
ATOM    244  O   GLN A  62      22.959  22.558  39.919  1.00  0.00           O  
ATOM    245  N   LYS A  63      23.298  21.208  41.704  1.00  0.00           N  
ATOM    246  CA  LYS A  63      22.235  20.279  41.377  1.00  0.00           C  
ATOM    247  C   LYS A  63      20.901  20.959  41.097  1.00  0.00           C  
ATOM    248  O   LYS A  63      20.449  21.869  41.788  1.00  0.00           O  
ATOM    249  N   GLU A  64      20.170  20.426  40.116  1.00  0.00           N  
ATOM    250  CA  GLU A  64      18.968  20.791  39.395  1.00  0.00           C  
ATOM    251  C   GLU A  64      18.925  22.224  38.880  1.00  0.00           C  
ATOM    252  O   GLU A  64      17.806  22.690  38.675  1.00  0.00           O  
ATOM    253  N   SER A  65      20.014  22.938  38.592  1.00  0.00           N  
ATOM    254  CA  SER A  65      19.847  24.133  37.789  1.00  0.00           C  
ATOM    255  C   SER A  65      19.141  23.840  36.473  1.00  0.00           C  
ATOM    256  O   SER A  65      19.758  23.056  35.755  1.00  0.00           O  
ATOM    257  N   THR A  66      17.999  24.395  36.061  1.00  0.00           N  
ATOM    258  CA  THR A  66      17.677  24.712  34.685  1.00  0.00           C  
ATOM    259  C   THR A  66      18.468  25.776  33.935  1.00  0.00           C  
ATOM    260  O   THR A  66      18.515  26.913  34.398  1.00  0.00           O  
ATOM    261  N   LEU A  67      19.243  25.218  33.003  1.00  0.00           N  
ATOM    262  CA  LEU A  67      20.027  26.005  32.072  1.00  0.00           C  
ATOM    263  C   LEU A  67      19.278  26.236  30.768  1.00  0.00           C  
ATOM    264  O   LEU A  67      18.354  25.457  30.541  1.00  0.00           O  
ATOM    265  N   HIS A  68      19.414  27.274  29.940  1.00  0.00           N  
ATOM    266  CA  HIS A  68      18.651  27.567  28.743  1.00  0.00           C  
ATOM    267  C   HIS A  68      19.440  27.354  27.460  1.00  0.00           C  
ATOM    268  O   HIS A  68      20.662  27.305  27.581  1.00  0.00           O  
ATOM    269  N   LEU A  69      18.813  27.571  26.302  1.00  0.00           N  
ATOM    270  CA  LEU A  69      19.454  27.418  25.011  1.00  0.00           C  
ATOM    271  C   LEU A  69      18.692  28.178  23.936  1.00  0.00           C  
ATOM    272  O   LEU A  69      17.557  27.807  23.645  1.00  0.00           O  
ATOM    273  N   VAL A  70      19.483  28.955  23.192  1.00  0.00           N  
ATOM    274  CA  VAL A  70      19.161  29.645  21.958  1.00  0.00           C  
ATOM    275  C   VAL A  70      19.978  29.059  20.816  1.00  0.00           C  
ATOM    276  O   VAL A  70      21.084  28.602  21.091  1.00  0.00           O  
TER
ENDMDL
MODEL      7
ATOM      1  N   GLN A   2      22.243  15.478  38.520  1.00  0.00           N  
ATOM      2  CA  GLN A   2      21.400  16.002  37.465  1.00  0.00           C  
ATOM      3  C   GLN A   2      21.473  17.520  37.382  1.00  0.00           C  
ATOM      4  O   GLN A   2      21.574  18.178  38.415  1.00  0.00           O  
ATOM      5  N   ILE A   3      21.493  18.086  36.173  1.00  0.00           N  
ATOM      6  CA  ILE A   3      21.002  19.382  35.752  1.00  0.00           C  
ATOM      7  C   ILE A   3      19.769  19.224  34.873  1.00  0.00           C  
ATOM      8  O   ILE A   3      19.405  18.113  34.495  1.00  0.00           O  
ATOM      9  N   PHE A   4      19.097  20.316  34.501  1.00  0.00           N  
ATOM     10  CA  PHE A   4      18.205  20.431  33.364  1.00  0.00           C  
ATOM     11  C   PHE A   4      18.665  21.453  32.334  1.00  0.00           C  
ATOM     12  O   PHE A   4      19.007  22.573  32.706  1.00  0.00           O  
ATOM     13  N   VAL A   5      18.554  21.236  31.021  1.00  0.00           N  
ATOM     14  CA  VAL A   5      18.462  22.321  30.064  1.00  0.00           C  
ATOM     15  C   VAL A   5      16.991  22.288  29.675  1.00  0.00           C  
ATOM     16  O   VAL A   5      16.432  21.308  29.188  1.00  0.00           O  
ATOM     17  N   LYS A   6      16.256  23.401  29.721  1.00  0.00           N  
ATOM     18  CA  LYS A   6      15.078  23.740  28.947  1.00  0.00           C  
ATOM     19  C   LYS A   6      15.308  24.629  27.734  1.00  0.00           C  
ATOM     20  O   LYS A   6      16.304  25.344  27.825  1.00  0.00           O  
ATOM     21  N   THR A   7      14.718  24.244  26.600  1.00  0.00           N  
ATOM     22  CA  THR A   7      15.009  24.925  25.356  1.00  0.00           C  
ATOM     23  C   THR A   7      14.263  26.220  25.071  1.00  0.00           C  
ATOM     24  O   THR A   7      13.336  26.578  25.794  1.00  0.00           O  
ATOM     25  N   LEU A   8      14.679  26.871  23.982  1.00  0.00           N  
ATOM     26  CA  LEU A   8      13.970  28.046  23.518  1.00  0.00           C  
ATOM     27  C   LEU A   8      12.551  27.604  23.191  1.00  0.00           C  
ATOM     28  O   LEU A   8      11.607  28.367  23.375  1.00  0.00           O  
ATOM     29  N   THR A   9      12.393  26.433  22.568  1.00  0.00           N  
ATOM     30  CA  THR A   9      11.118  25.835  22.227  1.00  0.00           C  
ATOM     31  C   THR A   9      10.352  25.187  23.372  1.00  0.00           C  
ATOM     32  O   THR A   9       9.286  24.604  23.189  1.00  0.00           O  
ATOM     33  N   GLY A  10      10.953  25.165  24.564  1.00  0.00           N  
ATOM     34  CA  GLY A  10      10.239  24.798  25.771  1.00  0.00           C  
ATOM     35  C   GLY A  10      10.141  23.351  26.233  1.00  0.00           C  
ATOM     36  O   GLY A  10       9.754  23.101  27.373  1.00  0.00           O  
ATOM     37  N   LYS A  11      10.653  22.451  25.390  1.00  0.00           N  
ATOM     38  CA  LYS A  11      11.022  21.077  25.664  1.00  0.00           C  
ATOM     39  C   LYS A  11      12.075  21.165  26.759  1.00  0.00           C  
ATOM     40  O   LYS A  11      12.687  22.190  27.051  1.00  0.00           O  
ATOM     41  N   THR A  12      12.321  20.094  27.517  1.00  0.00           N  
ATOM     42  CA  THR A  12      13.280  19.971  28.597  1.00  0.00           C  
ATOM     43  C   THR A  12      14.136  18.714  28.530  1.00  0.00           C  
ATOM     44  O   THR A  12      13.719  17.650  28.080  1.00  0.00           O  
ATOM     45  N   ILE A  13      15.394  18.820  28.962  1.00  0.00           N  
ATOM     46  CA  ILE A  13      16.493  17.919  28.677  1.00  0.00           C  
ATOM     47  C   ILE A  13      17.132  17.640  30.029  1.00  0.00           C  
ATOM     48  O   ILE A  13      17.755  18.510  30.634  1.00  0.00           O  
ATOM     49  N   THR A  14      17.009  16.421  30.560  1.00  0.00           N  
ATOM     50  CA  THR A  14      17.940  15.915  31.548  1.00  0.00           C  
ATOM     51  C   THR A  14      19.177  15.415  30.815  1.00  0.00           C  
ATOM     52  O   THR A  14      19.221  14.589  29.906  1.00  0.00           O  
ATOM     53  N   LEU A  15      20.220  15.855  31.522  1.00  0.00           N  
ATOM     54  CA  LEU A  15      21.620  15.483  31.547  1.00  0.00           C  
ATOM     55  C   LEU A  15      22.208  15.152  32.910  1.00  0.00           C  
ATOM     56  O   LEU A  15      21.907  15.775  33.926  1.00  0.00           O  
ATOM     57  N   GLU A  16      23.119  14.175  32.881  1.00  0.00           N  
ATOM     58  CA  GLU A  16      23.763  13.693  34.086  1.00  0.00           C  
ATOM     59  C   GLU A  16      25.196  14.174  33.915  1.00  0.00           C  
ATOM     60  O   GLU A  16      25.921  13.811  32.991  1.00  0.00           O  
ATOM     61  N   VAL A  17      25.621  15.138  34.737  1.00  0.00           N  
ATOM     62  CA  VAL A  17      26.890  15.835  34.783  1.00  0.00           C  
ATOM     63  C   VAL A  17      27.711  15.609  36.044  1.00  0.00           C  
ATOM     64  O   VAL A  17      27.176  15.218  37.079  1.00  0.00           O  
ATOM     65  N   GLU A  18      28.956  16.086  35.992  1.00  0.00           N  
ATOM     66  CA  GLU A  18      29.705  16.103  37.233  1.00  0.00           C  
ATOM     67  C   GLU A  18      30.156  17.531  37.504  1.00  0.00           C  
ATOM     68  O   GLU A  18      30.324  18.272  36.537  1.00  0.00           O  
ATOM     69  N   PRO A  19      30.434  17.929  38.747  1.00  0.00           N  
ATOM     70  CA  PRO A  19      30.888  19.252  39.126  1.00  0.00           C  
ATOM     71  C   PRO A  19      32.101  19.709  38.327  1.00  0.00           C  
ATOM     72  O   PRO A  19      32.141  20.846  37.863  1.00  0.00           O  
ATOM     73  N   SER A  20      33.071  18.832  38.061  1.00  0.00           N  
ATOM     74  CA  SER A  20      34.204  18.950  37.166  1.00  0.00           C  
ATOM     75  C   SER A  20      33.893  19.184  35.694  1.00  0.00           C  
ATOM     76  O   SER A  20      34.849  19.414  34.958  1.00  0.00           O  
ATOM     77  N   ASP A  21      32.687  19.044  35.139  1.00  0.00           N  
ATOM     78  CA  ASP A  21      32.456  19.065  33.709  1.00  0.00           C  
ATOM     79  C   ASP A  21      32.735  20.451  33.146  1.00  0.00           C  
ATOM     80  O   ASP A  21      32.236  21.466  33.626  1.00  0.00           O  
ATOM     81  N   THR A  22      33.167  20.456  31.883  1.00  0.00           N  
ATOM     82  CA  THR A  22      33.360  21.705  31.175  1.00  0.00           C  
ATOM     83  C   THR A  22      32.150  22.181  30.384  1.00  0.00           C  
ATOM     84  O   THR A  22      31.218  21.430  30.108  1.00  0.00           O  
ATOM     85  N   ILE A  23      32.145  23.421  29.890  1.00  0.00           N  
ATOM     86  CA  ILE A  23      31.012  23.856  29.097  1.00  0.00           C  
ATOM     87  C   ILE A  23      31.111  23.199  27.727  1.00  0.00           C  
ATOM     88  O   ILE A  23      30.102  23.111  27.032  1.00  0.00           O  
ATOM     89  N   GLU A  24      32.250  22.606  27.362  1.00  0.00           N  
ATOM     90  CA  GLU A  24      32.258  21.757  26.187  1.00  0.00           C  
ATOM     91  C   GLU A  24      31.667  20.393  26.512  1.00  0.00           C  
ATOM     92  O   GLU A  24      31.034  19.798  25.643  1.00  0.00           O  
ATOM     93  N   ASN A  25      31.792  19.762  27.681  1.00  0.00           N  
ATOM     94  CA  ASN A  25      31.114  18.560  28.126  1.00  0.00           C  
ATOM     95  C   ASN A  25      29.598  18.672  28.067  1.00  0.00           C  
ATOM     96  O   ASN A  25      29.049  17.734  27.494  1.00  0.00           O  
ATOM     97  N   VAL A  26      28.853  19.679  28.531  1.00  0.00           N  
ATOM     98  CA  VAL A  26      27.428  19.798  28.295  1.00  0.00           C  
ATOM     99  C   VAL A  26      27.212  19.616  26.799  1.00  0.00           C  
ATOM    100  O   VAL A  26      26.498  18.706  26.385  1.00  0.00           O  
ATOM    101  N   LYS A  27      27.833  20.480  25.992  1.00  0.00           N  
ATOM    102  CA  LYS A  27      27.584  20.565  24.567  1.00  0.00           C  
ATOM    103  C   LYS A  27      28.031  19.340  23.783  1.00  0.00           C  
ATOM    104  O   LYS A  27      27.236  19.134  22.868  1.00  0.00           O  
ATOM    105  N   ALA A  28      29.000  18.489  24.125  1.00  0.00           N  
ATOM    106  CA  ALA A  28      29.023  17.173  23.517  1.00  0.00           C  
ATOM    107  C   ALA A  28      27.965  16.228  24.065  1.00  0.00           C  
ATOM    108  O   ALA A  28      27.250  15.760  23.181  1.00  0.00           O  
ATOM    109  N   LYS A  29      27.633  16.052  25.346  1.00  0.00           N  
ATOM    110  CA  LYS A  29      26.505  15.333  25.905  1.00  0.00           C  
ATOM    111  C   LYS A  29      25.236  15.697  25.147  1.00  0.00           C  
ATOM    112  O   LYS A  29      24.549  14.866  24.558  1.00  0.00           O  
ATOM    113  N   ILE A  30      24.841  16.973  25.162  1.00  0.00           N  
ATOM    114  CA  ILE A  30      23.873  17.517  24.231  1.00  0.00           C  
ATOM    115  C   ILE A  30      24.098  17.150  22.771  1.00  0.00           C  
ATOM    116  O   ILE A  30      23.145  16.551  22.279  1.00  0.00           O  
ATOM    117  N   GLN A  31      25.132  17.503  22.003  1.00  0.00           N  
ATOM    118  CA  GLN A  31      25.267  17.252  20.582  1.00  0.00           C  
ATOM    119  C   GLN A  31      24.994  15.826  20.125  1.00  0.00           C  
ATOM    120  O   GLN A  31      24.353  15.659  19.090  1.00  0.00           O  
ATOM    121  N   ASP A  32      25.475  14.878  20.932  1.00  0.00           N  
ATOM    122  CA  ASP A  32      25.268  13.454  20.769  1.00  0.00           C  
ATOM    123  C   ASP A  32      23.839  12.942  20.871  1.00  0.00           C  
ATOM    124  O   ASP A  32      23.446  12.041  20.134  1.00  0.00           O  
ATOM    125  N   LYS A  33      22.986  13.590  21.669  1.00  0.00           N  
ATOM    126  CA  LYS A  33      21.667  13.170  22.099  1.00  0.00           C  
ATOM    127  C   LYS A  33      20.531  14.041  21.582  1.00  0.00           C  
ATOM    128  O   LYS A  33      19.409  13.561  21.440  1.00  0.00           O  
ATOM    129  N   GLU A  34      20.647  15.350  21.342  1.00  0.00           N  
ATOM    130  CA  GLU A  34      19.825  16.371  20.725  1.00  0.00           C  
ATOM    131  C   GLU A  34      20.201  16.794  19.312  1.00  0.00           C  
ATOM    132  O   GLU A  34      19.380  17.381  18.610  1.00  0.00           O  
ATOM    133  N   GLY A  35      21.478  16.592  18.979  1.00  0.00           N  
ATOM    134  CA  GLY A  35      21.819  16.631  17.571  1.00  0.00           C  
ATOM    135  C   GLY A  35      22.354  17.995  17.163  1.00  0.00           C  
ATOM    136  O   GLY A  35      22.458  18.293  15.975  1.00  0.00           O  
ATOM    137  N   ILE A  36      22.752  18.888  18.071  1.00  0.00           N  
ATOM    138  CA  ILE A  36      22.982  20.306  17.881  1.00  0.00           C  
ATOM    139  C   ILE A  36      24.471  20.613  17.958  1.00  0.00           C  
ATOM    140  O   ILE A  36      25.025  20.334  19.019  1.00  0.00           O  
ATOM    141  N   PRO A  37      25.173  21.294  17.048  1.00  0.00           N  
ATOM    142  CA  PRO A  37      26.599  21.518  16.926  1.00  0.00           C  
ATOM    143  C   PRO A  37      27.187  22.380  18.034  1.00  0.00           C  
ATOM    144  O   PRO A  37      26.553  23.359  18.421  1.00  0.00           O  
ATOM    145  N   PRO A  38      28.345  22.022  18.593  1.00  0.00           N  
ATOM    146  CA  PRO A  38      28.915  22.699  19.742  1.00  0.00           C  
ATOM    147  C   PRO A  38      28.988  24.180  19.403  1.00  0.00           C  
ATOM    148  O   PRO A  38      28.662  24.960  20.295  1.00  0.00           O  
ATOM    149  N   ASP A  39      29.528  24.543  18.236  1.00  0.00           N  
ATOM    150  CA  ASP A  39      29.467  25.860  17.635  1.00  0.00           C  
ATOM    151  C   ASP A  39      28.153  26.592  17.862  1.00  0.00           C  
ATOM    152  O   ASP A  39      28.113  27.724  18.341  1.00  0.00           O  
ATOM    153  N   GLN A  40      27.018  25.971  17.531  1.00  0.00           N  
ATOM    154  CA  GLN A  40      25.709  26.588  17.441  1.00  0.00           C  
ATOM    155  C   GLN A  40      25.065  26.886  18.787  1.00  0.00           C  
ATOM    156  O   GLN A  40      24.095  27.627  18.927  1.00  0.00           O  
ATOM    157  N   GLN A  41      25.432  26.115  19.813  1.00  0.00           N  
ATOM    158  CA  GLN A  41      24.959  26.189  21.180  1.00  0.00           C  
ATOM    159  C   GLN A  41      25.421  27.460  21.877  1.00  0.00           C  
ATOM    160  O   GLN A  41      26.629  27.630  22.028  1.00  0.00           O  
ATOM    161  N   ARG A  42      24.516  28.377  22.228  1.00  0.00           N  
ATOM    162  CA  ARG A  42      24.820  29.349  23.259  1.00  0.00           C  
ATOM    163  C   ARG A  42      24.260  28.694  24.513  1.00  0.00           C  
ATOM    164  O   ARG A  42      23.073  28.390  24.421  1.00  0.00           O  
ATOM    165  N   LEU A  43      24.975  28.641  25.639  1.00  0.00           N  
ATOM    166  CA  LEU A  43      24.493  28.359  26.977  1.00  0.00           C  
ATOM    167  C   LEU A  43      24.420  29.577  27.887  1.00  0.00           C  
ATOM    168  O   LEU A  43      25.364  30.364  27.903  1.00  0.00           O  
ATOM    169  N   ILE A  44      23.281  29.750  28.561  1.00  0.00           N  
ATOM    170  CA  ILE A  44      22.888  30.840  29.431  1.00  0.00           C  
ATOM    171  C   ILE A  44      22.491  30.292  30.794  1.00  0.00           C  
ATOM    172  O   ILE A  44      21.873  29.242  30.954  1.00  0.00           O  
ATOM    173  N   PHE A  45      22.903  31.012  31.841  1.00  0.00           N  
ATOM    174  CA  PHE A  45      22.638  30.744  33.240  1.00  0.00           C  
ATOM    175  C   PHE A  45      22.703  32.016  34.072  1.00  0.00           C  
ATOM    176  O   PHE A  45      23.565  32.829  33.748  1.00  0.00           O  
ATOM    177  N   ALA A  46      21.822  32.311  35.029  1.00  0.00           N  
ATOM    178  CA  ALA A  46      21.717  33.587  35.708  1.00  0.00           C  
ATOM    179  C   ALA A  46      21.949  34.760  34.766  1.00  0.00           C  
ATOM    180  O   ALA A  46      22.604  35.725  35.154  1.00  0.00           O  
ATOM    181  N   GLY A  47      21.475  34.761  33.518  1.00  0.00           N  
ATOM    182  CA  GLY A  47      21.602  35.935  32.679  1.00  0.00           C  
ATOM    183  C   GLY A  47      22.987  36.141  32.081  1.00  0.00           C  
ATOM    184  O   GLY A  47      23.210  37.200  31.498  1.00  0.00           O  
ATOM    185  N   LYS A  48      23.966  35.270  32.334  1.00  0.00           N  
ATOM    186  CA  LYS A  48      25.315  35.322  31.807  1.00  0.00           C  
ATOM    187  C   LYS A  48      25.666  34.184  30.859  1.00  0.00           C  
ATOM    188  O   LYS A  48      25.443  33.009  31.142  1.00  0.00           O  
ATOM    189  N   GLN A  49      26.171  34.546  29.677  1.00  0.00           N  
ATOM    190  CA  GLN A  49      26.523  33.536  28.700  1.00  0.00           C  
ATOM    191  C   GLN A  49      27.737  32.772  29.207  1.00  0.00           C  
ATOM    192  O   GLN A  49      28.598  33.397  29.822  1.00  0.00           O  
ATOM    193  N   LEU A  50      27.902  31.475  28.937  1.00  0.00           N  
ATOM    194  CA  LEU A  50      28.956  30.608  29.425  1.00  0.00           C  
ATOM    195  C   LEU A  50      30.180  30.548  28.523  1.00  0.00           C  
ATOM    196  O   LEU A  50      29.913  29.971  27.473  1.00  0.00           O  
ATOM    197  N   GLU A  51      31.378  31.002  28.901  1.00  0.00           N  
ATOM    198  CA  GLU A  51      32.597  30.837  28.134  1.00  0.00           C  
ATOM    199  C   GLU A  51      32.944  29.360  28.019  1.00  0.00           C  
ATOM    200  O   GLU A  51      32.964  28.643  29.017  1.00  0.00           O  
ATOM    201  N   ASP A  52      33.295  28.941  26.800  1.00  0.00           N  
ATOM    202  CA  ASP A  52      33.237  27.511  26.577  1.00  0.00           C  
ATOM    203  C   ASP A  52      34.280  26.555  27.140  1.00  0.00           C  
ATOM    204  O   ASP A  52      34.044  25.433  27.582  1.00  0.00           O  
ATOM    205  N   GLY A  53      35.374  27.202  27.547  1.00  0.00           N  
ATOM    206  CA  GLY A  53      36.341  26.689  28.496  1.00  0.00           C  
ATOM    207  C   GLY A  53      36.394  27.075  29.967  1.00  0.00           C  
ATOM    208  O   GLY A  53      37.463  26.916  30.551  1.00  0.00           O  
ATOM    209  N   ARG A  54      35.253  27.511  30.507  1.00  0.00           N  
ATOM    210  CA  ARG A  54      34.992  27.298  31.916  1.00  0.00           C  
ATOM    211  C   ARG A  54      34.085  26.096  32.140  1.00  0.00           C  
ATOM    212  O   ARG A  54      33.763  25.266  31.294  1.00  0.00           O  
ATOM    213  N   THR A  55      33.984  25.824  33.443  1.00  0.00           N  
ATOM    214  CA  THR A  55      33.275  24.689  34.000  1.00  0.00           C  
ATOM    215  C   THR A  55      31.997  25.096  34.719  1.00  0.00           C  
ATOM    216  O   THR A  55      31.680  26.272  34.887  1.00  0.00           O  
ATOM    217  N   LEU A  56      31.273  24.049  35.124  1.00  0.00           N  
ATOM    218  CA  LEU A  56      30.086  24.237  35.932  1.00  0.00           C  
ATOM    219  C   LEU A  56      30.258  24.885  37.298  1.00  0.00           C  
ATOM    220  O   LEU A  56      29.524  25.823  37.605  1.00  0.00           O  
ATOM    221  N   SER A  57      31.233  24.434  38.090  1.00  0.00           N  
ATOM    222  CA  SER A  57      31.723  25.084  39.289  1.00  0.00           C  
ATOM    223  C   SER A  57      32.086  26.550  39.103  1.00  0.00           C  
ATOM    224  O   SER A  57      31.940  27.312  40.056  1.00  0.00           O  
ATOM    225  N   ASP A  58      32.470  27.012  37.911  1.00  0.00           N  
ATOM    226  CA  ASP A  58      32.858  28.396  37.719  1.00  0.00           C  
ATOM    227  C   ASP A  58      31.652  29.257  38.067  1.00  0.00           C  
ATOM    228  O   ASP A  58      31.641  30.331  38.663  1.00  0.00           O  
ATOM    229  N   TYR A  59      30.614  28.715  37.424  1.00  0.00           N  
ATOM    230  CA  TYR A  59      29.383  29.472  37.329  1.00  0.00           C  
ATOM    231  C   TYR A  59      28.427  29.114  38.458  1.00  0.00           C  
ATOM    232  O   TYR A  59      27.267  29.516  38.510  1.00  0.00           O  
ATOM    233  N   ASN A  60      28.931  28.477  39.517  1.00  0.00           N  
ATOM    234  CA  ASN A  60      28.076  28.275  40.669  1.00  0.00           C  
ATOM    235  C   ASN A  60      26.818  27.458  40.409  1.00  0.00           C  
ATOM    236  O   ASN A  60      25.845  27.479  41.160  1.00  0.00           O  
ATOM    237  N   ILE A  61      26.759  26.703  39.309  1.00  0.00           N  
ATOM    238  CA  ILE A  61      25.713  25.833  38.814  1.00  0.00           C  
ATOM    239  C   ILE A  61      25.492  24.654  39.750  1.00  0.00           C  
ATOM    240  O   ILE A  61      26.484  23.947  39.913  1.00  0.00           O  
ATOM    241  N   GLN A  62      24.321  24.430  40.353  1.00  0.00           N  
ATOM    242  CA  GLN A  62      24.253  23.333  41.296  1.00  0.00           C  
ATOM    243  C   GLN A  62      23.255  22.305  40.782  1.00  0.00           C  
ATOM    244  O   GLN A  62      22.474  22.551  39.866  1.00  0.00           O  
ATOM    245  N   LYS A  63      23.452  21.119  41.361  1.00  0.00           N  
ATOM    246  CA  LYS A  63      22.465  20.061  41.433  1.00  0.00           C  
ATOM    247  C   LYS A  63      21.043  20.583  41.288  1.00  0.00           C  
ATOM    248  O   LYS A  63      20.431  21.099  42.221  1.00  0.00           O  
ATOM    249  N   GLU A  64      20.400  20.295  40.155  1.00  0.00           N  
ATOM    250  CA  GLU A  64      19.105  20.670  39.620  1.00  0.00           C  
ATOM    251  C   GLU A  64      18.813  22.080  39.128  1.00  0.00           C  
ATOM    252  O   GLU A  64      17.698  22.418  38.735  1.00  0.00           O  
ATOM    253  N   SER A  65      19.881  22.833  38.857  1.00  0.00           N  
ATOM    254  CA  SER A  65      19.826  24.153  38.260  1.00  0.00           C  
ATOM    255  C   SER A  65      19.572  24.084  36.761  1.00  0.00           C  
ATOM    256  O   SER A  65      20.320  23.347  36.122  1.00  0.00           O  
ATOM    257  N   THR A  66      18.437  24.565  36.249  1.00  0.00           N  
ATOM    258  CA  THR A  66      18.038  24.726  34.865  1.00  0.00           C  
ATOM    259  C   THR A  66      18.784  25.863  34.180  1.00  0.00           C  
ATOM    260  O   THR A  66      18.704  27.017  34.595  1.00  0.00           O  
ATOM    261  N   LEU A  67      19.480  25.500  33.100  1.00  0.00           N  
ATOM    262  CA  LEU A  67      20.077  26.464  32.198  1.00  0.00           C  
ATOM    263  C   LEU A  67      19.251  26.609  30.929  1.00  0.00           C  
ATOM    264  O   LEU A  67      18.583  25.654  30.537  1.00  0.00           O  
ATOM    265  N   HIS A  68      19.164  27.751  30.244  1.00  0.00           N  
ATOM    266  CA  HIS A  68      18.497  27.969  28.976  1.00  0.00           C  
ATOM    267  C   HIS A  68      19.546  27.739  27.898  1.00  0.00           C  
ATOM    268  O   HIS A  68      20.609  28.346  28.026  1.00  0.00           O  
ATOM    269  N   LEU A  69      19.290  26.892  26.899  1.00  0.00           N  
ATOM    270  CA  LEU A  69      20.128  26.845  25.717  1.00  0.00           C  
ATOM    271  C   LEU A  69      19.440  27.724  24.684  1.00  0.00           C  
ATOM    272  O   LEU A  69      18.280  27.461  24.375  1.00  0.00           O  
ATOM    273  N   VAL A  70      20.192  28.632  24.056  1.00  0.00           N  
ATOM    274  CA  VAL A  70      19.753  29.306  22.851  1.00  0.00           C  
ATOM    275  C   VAL A  70      20.616  28.779  21.713  1.00  0.00           C  
ATOM    276  O   VAL A  70      21.660  28.133  21.765  1.00  0.00           O  
TER
ENDMDL
MODEL      8
ATOM      1  N   GLN A   2      22.297  15.681  38.579  1.00  0.00           N  
ATOM      2  CA  GLN A   2      21.453  16.018  37.451  1.00  0.00           C  
ATOM      3  C   GLN A   2      21.272  17.515  37.242  1.00  0.00           C  
ATOM      4  O   GLN A   2      21.056  18.151  38.271  1.00  0.00           O  
ATOM      5  N   ILE A   3      21.246  18.021  36.007  1.00  0.00           N  
ATOM      6  CA  ILE A   3      20.752  19.307  35.557  1.00  0.00           C  
ATOM      7  C   ILE A   3      19.929  19.226  34.280  1.00  0.00           C  
ATOM      8  O   ILE A   3      20.136  18.332  33.462  1.00  0.00           O  
ATOM      9  N   PHE A   4      19.013  20.183  34.114  1.00  0.00           N  
ATOM     10  CA  PHE A   4      18.135  20.146  32.962  1.00  0.00           C  
ATOM     11  C   PHE A   4      18.340  21.363  32.072  1.00  0.00           C  
ATOM     12  O   PHE A   4      18.351  22.511  32.509  1.00  0.00           O  
ATOM     13  N   VAL A   5      18.283  21.113  30.762  1.00  0.00           N  
ATOM     14  CA  VAL A   5      18.384  22.134  29.739  1.00  0.00           C  
ATOM     15  C   VAL A   5      17.046  22.319  29.037  1.00  0.00           C  
ATOM     16  O   VAL A   5      16.459  21.449  28.396  1.00  0.00           O  
ATOM     17  N   LYS A   6      16.613  23.581  29.084  1.00  0.00           N  
ATOM     18  CA  LYS A   6      15.357  24.161  28.656  1.00  0.00           C  
ATOM     19  C   LYS A   6      15.557  24.797  27.288  1.00  0.00           C  
ATOM     20  O   LYS A   6      16.071  25.908  27.177  1.00  0.00           O  
ATOM     21  N   THR A   7      15.109  24.002  26.314  1.00  0.00           N  
ATOM     22  CA  THR A   7      15.307  24.260  24.902  1.00  0.00           C  
ATOM     23  C   THR A   7      14.491  25.444  24.405  1.00  0.00           C  
ATOM     24  O   THR A   7      13.588  25.835  25.142  1.00  0.00           O  
ATOM     25  N   LEU A   8      14.747  25.857  23.162  1.00  0.00           N  
ATOM     26  CA  LEU A   8      14.151  27.048  22.592  1.00  0.00           C  
ATOM     27  C   LEU A   8      12.631  27.069  22.650  1.00  0.00           C  
ATOM     28  O   LEU A   8      12.060  28.158  22.675  1.00  0.00           O  
ATOM     29  N   THR A   9      11.874  25.974  22.553  1.00  0.00           N  
ATOM     30  CA  THR A   9      10.437  25.959  22.739  1.00  0.00           C  
ATOM     31  C   THR A   9       9.888  25.414  24.049  1.00  0.00           C  
ATOM     32  O   THR A   9       8.712  25.210  24.345  1.00  0.00           O  
ATOM     33  N   GLY A  10      10.752  25.340  25.065  1.00  0.00           N  
ATOM     34  CA  GLY A  10      10.485  25.240  26.485  1.00  0.00           C  
ATOM     35  C   GLY A  10      10.302  23.794  26.925  1.00  0.00           C  
ATOM     36  O   GLY A  10       9.844  23.579  28.045  1.00  0.00           O  
ATOM     37  N   LYS A  11      10.723  22.758  26.197  1.00  0.00           N  
ATOM     38  CA  LYS A  11      10.958  21.374  26.560  1.00  0.00           C  
ATOM     39  C   LYS A  11      12.283  21.275  27.303  1.00  0.00           C  
ATOM     40  O   LYS A  11      13.023  22.244  27.450  1.00  0.00           O  
ATOM     41  N   THR A  12      12.493  20.117  27.932  1.00  0.00           N  
ATOM     42  CA  THR A  12      13.528  19.958  28.934  1.00  0.00           C  
ATOM     43  C   THR A  12      14.234  18.659  28.576  1.00  0.00           C  
ATOM     44  O   THR A  12      13.530  17.680  28.334  1.00  0.00           O  
ATOM     45  N   ILE A  13      15.547  18.733  28.346  1.00  0.00           N  
ATOM     46  CA  ILE A  13      16.296  17.536  28.022  1.00  0.00           C  
ATOM     47  C   ILE A  13      17.111  17.212  29.266  1.00  0.00           C  
ATOM     48  O   ILE A  13      17.849  18.054  29.772  1.00  0.00           O  
ATOM     49  N   THR A  14      17.063  15.931  29.637  1.00  0.00           N  
ATOM     50  CA  THR A  14      17.758  15.465  30.821  1.00  0.00           C  
ATOM     51  C   THR A  14      19.187  15.109  30.440  1.00  0.00           C  
ATOM     52  O   THR A  14      19.419  14.194  29.653  1.00  0.00           O  
ATOM     53  N   LEU A  15      20.046  15.776  31.213  1.00  0.00           N  
ATOM     54  CA  LEU A  15      21.472  15.581  31.375  1.00  0.00           C  
ATOM     55  C   LEU A  15      21.926  15.213  32.780  1.00  0.00           C  
ATOM     56  O   LEU A  15      21.433  15.664  33.813  1.00  0.00           O  
ATOM     57  N   GLU A  16      22.943  14.349  32.764  1.00  0.00           N  
ATOM     58  CA  GLU A  16      23.697  13.996  33.950  1.00  0.00           C  
ATOM     59  C   GLU A  16      25.101  14.565  33.802  1.00  0.00           C  
ATOM     60  O   GLU A  16      25.708  14.354  32.755  1.00  0.00           O  
ATOM     61  N   VAL A  17      25.570  15.347  34.777  1.00  0.00           N  
ATOM     62  CA  VAL A  17      26.863  16.002  34.805  1.00  0.00           C  
ATOM     63  C   VAL A  17      27.708  15.936  36.069  1.00  0.00           C  
ATOM     64  O   VAL A  17      27.105  15.794  37.131  1.00  0.00           O  
ATOM     65  N   GLU A  18      29.025  16.124  35.963  1.00  0.00           N  
ATOM     66  CA  GLU A  18      29.807  16.153  37.183  1.00  0.00           C  
ATOM     67  C   GLU A  18      30.271  17.582  37.428  1.00  0.00           C  
ATOM     68  O   GLU A  18      30.221  18.465  36.574  1.00  0.00           O  
ATOM     69  N   PRO A  19      30.555  18.005  38.662  1.00  0.00           N  
ATOM     70  CA  PRO A  19      30.779  19.391  39.022  1.00  0.00           C  
ATOM     71  C   PRO A  19      32.016  19.930  38.317  1.00  0.00           C  
ATOM     72  O   PRO A  19      32.088  21.153  38.227  1.00  0.00           O  
ATOM     73  N   SER A  20      32.927  19.039  37.917  1.00  0.00           N  
ATOM     74  CA  SER A  20      34.074  19.364  37.093  1.00  0.00           C  
ATOM     75  C   SER A  20      33.921  19.323  35.580  1.00  0.00           C  
ATOM     76  O   SER A  20      34.908  19.583  34.895  1.00  0.00           O  
ATOM     77  N   ASP A  21      32.754  19.050  34.990  1.00  0.00           N  
ATOM     78  CA  ASP A  21      32.477  19.147  33.571  1.00  0.00           C  
ATOM     79  C   ASP A  21      32.736  20.560  33.068  1.00  0.00           C  
ATOM     80  O   ASP A  21      32.393  21.548  33.713  1.00  0.00           O  
ATOM     81  N   THR A  22      33.355  20.659  31.889  1.00  0.00           N  
ATOM     82  CA  THR A  22      33.492  21.930  31.207  1.00  0.00           C  
ATOM     83  C   THR A  22      32.221  22.414  30.524  1.00  0.00           C  
ATOM     84  O   THR A  22      31.296  21.612  30.410  1.00  0.00           O  
ATOM     85  N   ILE A  23      32.086  23.690  30.157  1.00  0.00           N  
ATOM     86  CA  ILE A  23      30.977  24.056  29.299  1.00  0.00           C  
ATOM     87  C   ILE A  23      31.125  23.387  27.939  1.00  0.00           C  
ATOM     88  O   ILE A  23      30.153  23.009  27.289  1.00  0.00           O  
ATOM     89  N   GLU A  24      32.327  23.009  27.501  1.00  0.00           N  
ATOM     90  CA  GLU A  24      32.447  22.164  26.330  1.00  0.00           C  
ATOM     91  C   GLU A  24      31.789  20.811  26.562  1.00  0.00           C  
ATOM     92  O   GLU A  24      31.024  20.386  25.699  1.00  0.00           O  
ATOM     93  N   ASN A  25      32.055  20.082  27.649  1.00  0.00           N  
ATOM     94  CA  ASN A  25      31.550  18.766  27.984  1.00  0.00           C  
ATOM     95  C   ASN A  25      30.033  18.894  28.011  1.00  0.00           C  
ATOM     96  O   ASN A  25      29.453  18.049  27.332  1.00  0.00           O  
ATOM     97  N   VAL A  26      29.376  19.827  28.702  1.00  0.00           N  
ATOM     98  CA  VAL A  26      27.944  19.891  28.488  1.00  0.00           C  
ATOM     99  C   VAL A  26      27.519  19.887  27.027  1.00  0.00           C  
ATOM    100  O   VAL A  26      26.682  19.048  26.703  1.00  0.00           O  
ATOM    101  N   LYS A  27      28.122  20.736  26.192  1.00  0.00           N  
ATOM    102  CA  LYS A  27      27.702  20.899  24.815  1.00  0.00           C  
ATOM    103  C   LYS A  27      27.889  19.617  24.017  1.00  0.00           C  
ATOM    104  O   LYS A  27      26.987  19.360  23.222  1.00  0.00           O  
ATOM    105  N   ALA A  28      28.986  18.907  24.289  1.00  0.00           N  
ATOM    106  CA  ALA A  28      29.140  17.654  23.579  1.00  0.00           C  
ATOM    107  C   ALA A  28      28.106  16.647  24.063  1.00  0.00           C  
ATOM    108  O   ALA A  28      27.726  15.894  23.168  1.00  0.00           O  
ATOM    109  N   LYS A  29      27.656  16.656  25.320  1.00  0.00           N  
ATOM    110  CA  LYS A  29      26.555  15.798  25.704  1.00  0.00           C  
ATOM    111  C   LYS A  29      25.257  16.238  25.041  1.00  0.00           C  
ATOM    112  O   LYS A  29      24.432  15.350  24.844  1.00  0.00           O  
ATOM    113  N   ILE A  30      24.910  17.526  24.964  1.00  0.00           N  
ATOM    114  CA  ILE A  30      23.728  18.024  24.290  1.00  0.00           C  
ATOM    115  C   ILE A  30      23.818  17.625  22.824  1.00  0.00           C  
ATOM    116  O   ILE A  30      22.819  17.187  22.259  1.00  0.00           O  
ATOM    117  N   GLN A  31      24.977  17.702  22.165  1.00  0.00           N  
ATOM    118  CA  GLN A  31      25.236  17.237  20.817  1.00  0.00           C  
ATOM    119  C   GLN A  31      24.904  15.790  20.489  1.00  0.00           C  
ATOM    120  O   GLN A  31      24.265  15.556  19.465  1.00  0.00           O  
ATOM    121  N   ASP A  32      25.218  14.866  21.400  1.00  0.00           N  
ATOM    122  CA  ASP A  32      24.782  13.492  21.552  1.00  0.00           C  
ATOM    123  C   ASP A  32      23.273  13.305  21.611  1.00  0.00           C  
ATOM    124  O   ASP A  32      22.729  12.486  20.874  1.00  0.00           O  
ATOM    125  N   LYS A  33      22.556  14.146  22.360  1.00  0.00           N  
ATOM    126  CA  LYS A  33      21.152  13.979  22.674  1.00  0.00           C  
ATOM    127  C   LYS A  33      20.260  14.542  21.576  1.00  0.00           C  
ATOM    128  O   LYS A  33      19.349  13.827  21.165  1.00  0.00           O  
ATOM    129  N   GLU A  34      20.455  15.777  21.110  1.00  0.00           N  
ATOM    130  CA  GLU A  34      19.614  16.597  20.261  1.00  0.00           C  
ATOM    131  C   GLU A  34      20.224  16.823  18.884  1.00  0.00           C  
ATOM    132  O   GLU A  34      19.413  17.069  17.994  1.00  0.00           O  
ATOM    133  N   GLY A  35      21.518  16.527  18.737  1.00  0.00           N  
ATOM    134  CA  GLY A  35      22.101  16.377  17.420  1.00  0.00           C  
ATOM    135  C   GLY A  35      22.455  17.750  16.864  1.00  0.00           C  
ATOM    136  O   GLY A  35      22.586  17.964  15.661  1.00  0.00           O  
ATOM    137  N   ILE A  36      22.683  18.737  17.733  1.00  0.00           N  
ATOM    138  CA  ILE A  36      23.055  20.124  17.535  1.00  0.00           C  
ATOM    139  C   ILE A  36      24.530  20.473  17.665  1.00  0.00           C  
ATOM    140  O   ILE A  36      25.056  20.351  18.769  1.00  0.00           O  
ATOM    141  N   PRO A  37      25.293  20.881  16.648  1.00  0.00           N  
ATOM    142  CA  PRO A  37      26.686  21.277  16.678  1.00  0.00           C  
ATOM    143  C   PRO A  37      27.204  22.196  17.775  1.00  0.00           C  
ATOM    144  O   PRO A  37      26.500  23.153  18.089  1.00  0.00           O  
ATOM    145  N   PRO A  38      28.321  21.999  18.478  1.00  0.00           N  
ATOM    146  CA  PRO A  38      28.721  22.835  19.593  1.00  0.00           C  
ATOM    147  C   PRO A  38      28.954  24.319  19.352  1.00  0.00           C  
ATOM    148  O   PRO A  38      28.623  25.074  20.263  1.00  0.00           O  
ATOM    149  N   ASP A  39      29.301  24.774  18.145  1.00  0.00           N  
ATOM    150  CA  ASP A  39      29.161  26.147  17.703  1.00  0.00           C  
ATOM    151  C   ASP A  39      27.775  26.739  17.910  1.00  0.00           C  
ATOM    152  O   ASP A  39      27.594  27.808  18.487  1.00  0.00           O  
ATOM    153  N   GLN A  40      26.731  26.020  17.491  1.00  0.00           N  
ATOM    154  CA  GLN A  40      25.322  26.363  17.464  1.00  0.00           C  
ATOM    155  C   GLN A  40      24.727  26.592  18.846  1.00  0.00           C  
ATOM    156  O   GLN A  40      23.576  27.002  18.974  1.00  0.00           O  
ATOM    157  N   GLN A  41      25.423  26.302  19.948  1.00  0.00           N  
ATOM    158  CA  GLN A  41      25.012  26.267  21.337  1.00  0.00           C  
ATOM    159  C   GLN A  41      25.464  27.512  22.089  1.00  0.00           C  
ATOM    160  O   GLN A  41      26.560  27.564  22.643  1.00  0.00           O  
ATOM    161  N   ARG A  42      24.553  28.467  22.286  1.00  0.00           N  
ATOM    162  CA  ARG A  42      24.736  29.544  23.239  1.00  0.00           C  
ATOM    163  C   ARG A  42      24.036  28.998  24.475  1.00  0.00           C  
ATOM    164  O   ARG A  42      22.910  28.508  24.414  1.00  0.00           O  
ATOM    165  N   LEU A  43      24.688  28.908  25.636  1.00  0.00           N  
ATOM    166  CA  LEU A  43      24.089  28.518  26.896  1.00  0.00           C  
ATOM    167  C   LEU A  43      24.259  29.692  27.850  1.00  0.00           C  
ATOM    168  O   LEU A  43      25.388  30.117  28.086  1.00  0.00           O  
ATOM    169  N   ILE A  44      23.166  30.278  28.343  1.00  0.00           N  
ATOM    170  CA  ILE A  44      23.034  31.506  29.101  1.00  0.00           C  
ATOM    171  C   ILE A  44      22.079  31.274  30.264  1.00  0.00           C  
ATOM    172  O   ILE A  44      21.146  30.474  30.234  1.00  0.00           O  
ATOM    173  N   PHE A  45      22.626  31.594  31.439  1.00  0.00           N  
ATOM    174  CA  PHE A  45      22.180  31.242  32.772  1.00  0.00           C  
ATOM    175  C   PHE A  45      22.506  32.262  33.854  1.00  0.00           C  
ATOM    176  O   PHE A  45      23.658  32.680  33.934  1.00  0.00           O  
ATOM    177  N   ALA A  46      21.565  32.622  34.730  1.00  0.00           N  
ATOM    178  CA  ALA A  46      21.552  33.767  35.619  1.00  0.00           C  
ATOM    179  C   ALA A  46      21.947  34.998  34.814  1.00  0.00           C  
ATOM    180  O   ALA A  46      22.712  35.889  35.173  1.00  0.00           O  
ATOM    181  N   GLY A  47      21.604  34.978  33.523  1.00  0.00           N  
ATOM    182  CA  GLY A  47      21.997  35.896  32.475  1.00  0.00           C  
ATOM    183  C   GLY A  47      23.498  36.027  32.257  1.00  0.00           C  
ATOM    184  O   GLY A  47      23.880  37.102  31.799  1.00  0.00           O  
ATOM    185  N   LYS A  48      24.392  35.138  32.694  1.00  0.00           N  
ATOM    186  CA  LYS A  48      25.768  34.966  32.270  1.00  0.00           C  
ATOM    187  C   LYS A  48      25.937  33.991  31.114  1.00  0.00           C  
ATOM    188  O   LYS A  48      25.539  32.828  31.092  1.00  0.00           O  
ATOM    189  N   GLN A  49      26.617  34.443  30.058  1.00  0.00           N  
ATOM    190  CA  GLN A  49      26.877  33.649  28.873  1.00  0.00           C  
ATOM    191  C   GLN A  49      28.059  32.735  29.161  1.00  0.00           C  
ATOM    192  O   GLN A  49      29.145  33.183  29.521  1.00  0.00           O  
ATOM    193  N   LEU A  50      27.813  31.428  29.046  1.00  0.00           N  
ATOM    194  CA  LEU A  50      28.685  30.395  29.567  1.00  0.00           C  
ATOM    195  C   LEU A  50      29.822  30.286  28.562  1.00  0.00           C  
ATOM    196  O   LEU A  50      29.585  30.296  27.357  1.00  0.00           O  
ATOM    197  N   GLU A  51      31.011  30.003  29.102  1.00  0.00           N  
ATOM    198  CA  GLU A  51      32.261  29.970  28.371  1.00  0.00           C  
ATOM    199  C   GLU A  51      32.942  28.617  28.220  1.00  0.00           C  
ATOM    200  O   GLU A  51      33.188  28.129  29.321  1.00  0.00           O  
ATOM    201  N   ASP A  52      33.062  28.123  26.986  1.00  0.00           N  
ATOM    202  CA  ASP A  52      33.431  26.755  26.680  1.00  0.00           C  
ATOM    203  C   ASP A  52      34.498  26.135  27.571  1.00  0.00           C  
ATOM    204  O   ASP A  52      34.256  25.052  28.098  1.00  0.00           O  
ATOM    205  N   GLY A  53      35.555  26.836  27.989  1.00  0.00           N  
ATOM    206  CA  GLY A  53      36.579  26.298  28.862  1.00  0.00           C  
ATOM    207  C   GLY A  53      36.416  26.255  30.375  1.00  0.00           C  
ATOM    208  O   GLY A  53      37.273  25.709  31.065  1.00  0.00           O  
ATOM    209  N   ARG A  54      35.400  26.956  30.883  1.00  0.00           N  
ATOM    210  CA  ARG A  54      35.140  26.980  32.308  1.00  0.00           C  
ATOM    211  C   ARG A  54      34.076  25.996  32.775  1.00  0.00           C  
ATOM    212  O   ARG A  54      33.483  25.291  31.961  1.00  0.00           O  
ATOM    213  N   THR A  55      34.156  25.609  34.050  1.00  0.00           N  
ATOM    214  CA  THR A  55      33.359  24.525  34.586  1.00  0.00           C  
ATOM    215  C   THR A  55      32.149  25.134  35.280  1.00  0.00           C  
ATOM    216  O   THR A  55      32.061  26.259  35.766  1.00  0.00           O  
ATOM    217  N   LEU A  56      31.210  24.201  35.461  1.00  0.00           N  
ATOM    218  CA  LEU A  56      30.050  24.172  36.328  1.00  0.00           C  
ATOM    219  C   LEU A  56      30.350  24.774  37.693  1.00  0.00           C  
ATOM    220  O   LEU A  56      29.540  25.622  38.062  1.00  0.00           O  
ATOM    221  N   SER A  57      31.421  24.483  38.434  1.00  0.00           N  
ATOM    222  CA  SER A  57      31.752  25.116  39.694  1.00  0.00           C  
ATOM    223  C   SER A  57      32.207  26.564  39.571  1.00  0.00           C  
ATOM    224  O   SER A  57      31.822  27.239  40.523  1.00  0.00           O  
ATOM    225  N   ASP A  58      32.844  27.021  38.490  1.00  0.00           N  
ATOM    226  CA  ASP A  58      33.134  28.418  38.238  1.00  0.00           C  
ATOM    227  C   ASP A  58      31.912  29.317  38.370  1.00  0.00           C  
ATOM    228  O   ASP A  58      31.896  30.310  39.093  1.00  0.00           O  
ATOM    229  N   TYR A  59      30.787  28.881  37.797  1.00  0.00           N  
ATOM    230  CA  TYR A  59      29.484  29.497  37.648  1.00  0.00           C  
ATOM    231  C   TYR A  59      28.693  29.208  38.916  1.00  0.00           C  
ATOM    232  O   TYR A  59      27.571  29.708  38.860  1.00  0.00           O  
ATOM    233  N   ASN A  60      29.063  28.430  39.935  1.00  0.00           N  
ATOM    234  CA  ASN A  60      28.283  27.954  41.061  1.00  0.00           C  
ATOM    235  C   ASN A  60      26.985  27.256  40.682  1.00  0.00           C  
ATOM    236  O   ASN A  60      25.965  27.255  41.366  1.00  0.00           O  
ATOM    237  N   ILE A  61      27.074  26.467  39.608  1.00  0.00           N  
ATOM    238  CA  ILE A  61      26.021  25.616  39.089  1.00  0.00           C  
ATOM    239  C   ILE A  61      26.034  24.482  40.104  1.00  0.00           C  
ATOM    240  O   ILE A  61      27.073  23.880  40.364  1.00  0.00           O  
ATOM    241  N   GLN A  62      24.885  24.014  40.597  1.00  0.00           N  
ATOM    242  CA  GLN A  62      24.747  22.902  41.515  1.00  0.00           C  
ATOM    243  C   GLN A  62      23.666  22.011  40.921  1.00  0.00           C  
ATOM    244  O   GLN A  62      22.929  22.341  39.994  1.00  0.00           O  
ATOM    245  N   LYS A  63      23.493  20.921  41.670  1.00  0.00           N  
ATOM    246  CA  LYS A  63      22.403  19.981  41.503  1.00  0.00           C  
ATOM    247  C   LYS A  63      21.108  20.706  41.160  1.00  0.00           C  
ATOM    248  O   LYS A  63      20.666  21.613  41.861  1.00  0.00           O  
ATOM    249  N   GLU A  64      20.418  20.239  40.117  1.00  0.00           N  
ATOM    250  CA  GLU A  64      19.075  20.623  39.730  1.00  0.00           C  
ATOM    251  C   GLU A  64      18.758  22.019  39.213  1.00  0.00           C  
ATOM    252  O   GLU A  64      17.679  22.599  39.300  1.00  0.00           O  
ATOM    253  N   SER A  65      19.799  22.594  38.605  1.00  0.00           N  
ATOM    254  CA  SER A  65      19.798  23.911  38.001  1.00  0.00           C  
ATOM    255  C   SER A  65      19.424  23.764  36.533  1.00  0.00           C  
ATOM    256  O   SER A  65      19.449  22.708  35.905  1.00  0.00           O  
ATOM    257  N   THR A  66      19.147  24.895  35.880  1.00  0.00           N  
ATOM    258  CA  THR A  66      18.736  24.875  34.490  1.00  0.00           C  
ATOM    259  C   THR A  66      19.419  25.869  33.563  1.00  0.00           C  
ATOM    260  O   THR A  66      19.501  27.050  33.896  1.00  0.00           O  
ATOM    261  N   LEU A  67      19.984  25.397  32.450  1.00  0.00           N  
ATOM    262  CA  LEU A  67      20.514  26.348  31.493  1.00  0.00           C  
ATOM    263  C   LEU A  67      19.540  26.396  30.323  1.00  0.00           C  
ATOM    264  O   LEU A  67      18.757  25.465  30.147  1.00  0.00           O  
ATOM    265  N   HIS A  68      19.455  27.513  29.597  1.00  0.00           N  
ATOM    266  CA  HIS A  68      18.590  27.859  28.488  1.00  0.00           C  
ATOM    267  C   HIS A  68      19.324  27.509  27.201  1.00  0.00           C  
ATOM    268  O   HIS A  68      20.254  28.270  26.941  1.00  0.00           O  
ATOM    269  N   LEU A  69      19.006  26.508  26.377  1.00  0.00           N  
ATOM    270  CA  LEU A  69      19.688  26.453  25.100  1.00  0.00           C  
ATOM    271  C   LEU A  69      18.813  27.302  24.189  1.00  0.00           C  
ATOM    272  O   LEU A  69      17.641  27.004  23.976  1.00  0.00           O  
ATOM    273  N   VAL A  70      19.409  28.400  23.716  1.00  0.00           N  
ATOM    274  CA  VAL A  70      18.925  29.153  22.577  1.00  0.00           C  
ATOM    275  C   VAL A  70      19.803  28.948  21.352  1.00  0.00           C  
ATOM    276  O   VAL A  70      21.004  29.139  21.526  1.00  0.00           O  
TER
ENDMDL
MODEL      9
ATOM      1  N   GLN A   2      23.105  15.916  38.167  1.00  0.00           N  
ATOM      2  CA  GLN A   2      22.051  16.208  37.217  1.00  0.00           C  
ATOM      3  C   GLN A   2      21.695  17.682  37.078  1.00  0.00           C  
ATOM      4  O   GLN A   2      21.622  18.421  38.057  1.00  0.00           O  
ATOM      5  N   ILE A   3      21.599  18.163  35.836  1.00  0.00           N  
ATOM      6  CA  ILE A   3      21.148  19.479  35.433  1.00  0.00           C  
ATOM      7  C   ILE A   3      20.117  19.491  34.313  1.00  0.00           C  
ATOM      8  O   ILE A   3      20.051  18.606  33.462  1.00  0.00           O  
ATOM      9  N   PHE A   4      19.308  20.550  34.242  1.00  0.00           N  
ATOM     10  CA  PHE A   4      18.383  20.599  33.129  1.00  0.00           C  
ATOM     11  C   PHE A   4      18.840  21.594  32.071  1.00  0.00           C  
ATOM     12  O   PHE A   4      19.205  22.695  32.475  1.00  0.00           O  
ATOM     13  N   VAL A   5      18.600  21.296  30.792  1.00  0.00           N  
ATOM     14  CA  VAL A   5      18.453  22.363  29.823  1.00  0.00           C  
ATOM     15  C   VAL A   5      17.134  22.480  29.072  1.00  0.00           C  
ATOM     16  O   VAL A   5      16.601  21.580  28.429  1.00  0.00           O  
ATOM     17  N   LYS A   6      16.427  23.605  29.207  1.00  0.00           N  
ATOM     18  CA  LYS A   6      15.172  23.979  28.588  1.00  0.00           C  
ATOM     19  C   LYS A   6      15.436  24.731  27.292  1.00  0.00           C  
ATOM     20  O   LYS A   6      16.241  25.659  27.275  1.00  0.00           O  
ATOM     21  N   THR A   7      14.631  24.322  26.309  1.00  0.00           N  
ATOM     22  CA  THR A   7      14.754  24.913  24.991  1.00  0.00           C  
ATOM     23  C   THR A   7      13.912  26.157  24.741  1.00  0.00           C  
ATOM     24  O   THR A   7      13.086  26.525  25.573  1.00  0.00           O  
ATOM     25  N   LEU A   8      14.216  26.861  23.649  1.00  0.00           N  
ATOM     26  CA  LEU A   8      13.288  27.826  23.094  1.00  0.00           C  
ATOM     27  C   LEU A   8      11.802  27.584  22.866  1.00  0.00           C  
ATOM     28  O   LEU A   8      10.988  28.501  22.937  1.00  0.00           O  
ATOM     29  N   THR A   9      11.446  26.322  22.612  1.00  0.00           N  
ATOM     30  CA  THR A   9      10.095  25.811  22.720  1.00  0.00           C  
ATOM     31  C   THR A   9       9.791  25.064  24.010  1.00  0.00           C  
ATOM     32  O   THR A   9       8.703  24.493  24.012  1.00  0.00           O  
ATOM     33  N   GLY A  10      10.598  25.126  25.073  1.00  0.00           N  
ATOM     34  CA  GLY A  10      10.151  24.688  26.379  1.00  0.00           C  
ATOM     35  C   GLY A  10      10.033  23.178  26.539  1.00  0.00           C  
ATOM     36  O   GLY A  10       9.164  22.747  27.294  1.00  0.00           O  
ATOM     37  N   LYS A  11      10.713  22.330  25.764  1.00  0.00           N  
ATOM     38  CA  LYS A  11      11.089  20.999  26.197  1.00  0.00           C  
ATOM     39  C   LYS A  11      12.471  21.006  26.835  1.00  0.00           C  
ATOM     40  O   LYS A  11      13.396  21.602  26.290  1.00  0.00           O  
ATOM     41  N   THR A  12      12.534  20.373  28.009  1.00  0.00           N  
ATOM     42  CA  THR A  12      13.576  20.453  29.012  1.00  0.00           C  
ATOM     43  C   THR A  12      14.186  19.059  29.012  1.00  0.00           C  
ATOM     44  O   THR A  12      13.457  18.076  29.133  1.00  0.00           O  
ATOM     45  N   ILE A  13      15.415  18.929  28.507  1.00  0.00           N  
ATOM     46  CA  ILE A  13      16.082  17.658  28.314  1.00  0.00           C  
ATOM     47  C   ILE A  13      17.164  17.388  29.350  1.00  0.00           C  
ATOM     48  O   ILE A  13      17.727  18.348  29.870  1.00  0.00           O  
ATOM     49  N   THR A  14      17.434  16.114  29.647  1.00  0.00           N  
ATOM     50  CA  THR A  14      18.185  15.842  30.855  1.00  0.00           C  
ATOM     51  C   THR A  14      19.553  15.331  30.427  1.00  0.00           C  
ATOM     52  O   THR A  14      19.770  14.389  29.668  1.00  0.00           O  
ATOM     53  N   LEU A  15      20.472  15.955  31.168  1.00  0.00           N  
ATOM     54  CA  LEU A  15      21.919  15.883  31.119  1.00  0.00           C  
ATOM     55  C   LEU A  15      22.486  15.374  32.436  1.00  0.00           C  
ATOM     56  O   LEU A  15      22.357  15.960  33.509  1.00  0.00           O  
ATOM     57  N   GLU A  16      23.252  14.281  32.405  1.00  0.00           N  
ATOM     58  CA  GLU A  16      23.810  13.786  33.647  1.00  0.00           C  
ATOM     59  C   GLU A  16      25.183  14.440  33.707  1.00  0.00           C  
ATOM     60  O   GLU A  16      25.891  14.155  32.744  1.00  0.00           O  
ATOM     61  N   VAL A  17      25.529  15.289  34.678  1.00  0.00           N  
ATOM     62  CA  VAL A  17      26.858  15.859  34.773  1.00  0.00           C  
ATOM     63  C   VAL A  17      27.575  15.863  36.115  1.00  0.00           C  
ATOM     64  O   VAL A  17      26.806  15.959  37.070  1.00  0.00           O  
ATOM     65  N   GLU A  18      28.908  15.942  36.100  1.00  0.00           N  
ATOM     66  CA  GLU A  18      29.624  16.037  37.356  1.00  0.00           C  
ATOM     67  C   GLU A  18      30.325  17.376  37.530  1.00  0.00           C  
ATOM     68  O   GLU A  18      30.483  18.161  36.597  1.00  0.00           O  
ATOM     69  N   PRO A  19      30.610  17.794  38.766  1.00  0.00           N  
ATOM     70  CA  PRO A  19      30.917  19.197  38.957  1.00  0.00           C  
ATOM     71  C   PRO A  19      32.202  19.714  38.327  1.00  0.00           C  
ATOM     72  O   PRO A  19      32.315  20.937  38.263  1.00  0.00           O  
ATOM     73  N   SER A  20      33.115  18.824  37.936  1.00  0.00           N  
ATOM     74  CA  SER A  20      34.390  19.055  37.289  1.00  0.00           C  
ATOM     75  C   SER A  20      34.335  19.186  35.774  1.00  0.00           C  
ATOM     76  O   SER A  20      35.354  19.393  35.117  1.00  0.00           O  
ATOM     77  N   ASP A  21      33.179  19.146  35.108  1.00  0.00           N  
ATOM     78  CA  ASP A  21      32.891  19.169  33.688  1.00  0.00           C  
ATOM     79  C   ASP A  21      33.042  20.568  33.108  1.00  0.00           C  
ATOM     80  O   ASP A  21      32.558  21.561  33.647  1.00  0.00           O  
ATOM     81  N   THR A  22      33.569  20.612  31.883  1.00  0.00           N  
ATOM     82  CA  THR A  22      33.553  21.872  31.166  1.00  0.00           C  
ATOM     83  C   THR A  22      32.220  22.171  30.495  1.00  0.00           C  
ATOM     84  O   THR A  22      31.486  21.294  30.044  1.00  0.00           O  
ATOM     85  N   ILE A  23      31.973  23.473  30.340  1.00  0.00           N  
ATOM     86  CA  ILE A  23      30.906  23.835  29.429  1.00  0.00           C  
ATOM     87  C   ILE A  23      31.086  23.204  28.056  1.00  0.00           C  
ATOM     88  O   ILE A  23      30.116  22.594  27.611  1.00  0.00           O  
ATOM     89  N   GLU A  24      32.317  23.115  27.548  1.00  0.00           N  
ATOM     90  CA  GLU A  24      32.540  22.351  26.336  1.00  0.00           C  
ATOM     91  C   GLU A  24      32.045  20.919  26.487  1.00  0.00           C  
ATOM     92  O   GLU A  24      31.244  20.477  25.667  1.00  0.00           O  
ATOM     93  N   ASN A  25      32.284  20.158  27.556  1.00  0.00           N  
ATOM     94  CA  ASN A  25      31.929  18.788  27.872  1.00  0.00           C  
ATOM     95  C   ASN A  25      30.435  18.697  28.146  1.00  0.00           C  
ATOM     96  O   ASN A  25      29.769  17.712  27.834  1.00  0.00           O  
ATOM     97  N   VAL A  26      29.753  19.758  28.580  1.00  0.00           N  
ATOM     98  CA  VAL A  26      28.316  19.905  28.703  1.00  0.00           C  
ATOM     99  C   VAL A  26      27.667  19.886  27.327  1.00  0.00           C  
ATOM    100  O   VAL A  26      26.701  19.165  27.087  1.00  0.00           O  
ATOM    101  N   LYS A  27      28.165  20.570  26.293  1.00  0.00           N  
ATOM    102  CA  LYS A  27      27.673  20.661  24.934  1.00  0.00           C  
ATOM    103  C   LYS A  27      27.930  19.363  24.182  1.00  0.00           C  
ATOM    104  O   LYS A  27      27.079  19.086  23.340  1.00  0.00           O  
ATOM    105  N   ALA A  28      28.945  18.567  24.527  1.00  0.00           N  
ATOM    106  CA  ALA A  28      28.959  17.236  23.955  1.00  0.00           C  
ATOM    107  C   ALA A  28      27.702  16.468  24.339  1.00  0.00           C  
ATOM    108  O   ALA A  28      27.173  15.758  23.486  1.00  0.00           O  
ATOM    109  N   LYS A  29      27.225  16.650  25.572  1.00  0.00           N  
ATOM    110  CA  LYS A  29      26.139  15.912  26.185  1.00  0.00           C  
ATOM    111  C   LYS A  29      24.781  16.397  25.697  1.00  0.00           C  
ATOM    112  O   LYS A  29      23.848  15.610  25.556  1.00  0.00           O  
ATOM    113  N   ILE A  30      24.741  17.684  25.346  1.00  0.00           N  
ATOM    114  CA  ILE A  30      23.662  18.208  24.532  1.00  0.00           C  
ATOM    115  C   ILE A  30      23.595  17.521  23.176  1.00  0.00           C  
ATOM    116  O   ILE A  30      22.510  17.082  22.800  1.00  0.00           O  
ATOM    117  N   GLN A  31      24.653  17.370  22.376  1.00  0.00           N  
ATOM    118  CA  GLN A  31      24.730  16.993  20.978  1.00  0.00           C  
ATOM    119  C   GLN A  31      24.200  15.595  20.693  1.00  0.00           C  
ATOM    120  O   GLN A  31      23.512  15.476  19.682  1.00  0.00           O  
ATOM    121  N   ASP A  32      24.417  14.625  21.585  1.00  0.00           N  
ATOM    122  CA  ASP A  32      23.968  13.249  21.641  1.00  0.00           C  
ATOM    123  C   ASP A  32      22.448  13.192  21.600  1.00  0.00           C  
ATOM    124  O   ASP A  32      21.929  12.242  21.018  1.00  0.00           O  
ATOM    125  N   LYS A  33      21.803  14.192  22.207  1.00  0.00           N  
ATOM    126  CA  LYS A  33      20.383  14.144  22.488  1.00  0.00           C  
ATOM    127  C   LYS A  33      19.582  14.995  21.512  1.00  0.00           C  
ATOM    128  O   LYS A  33      18.539  14.525  21.064  1.00  0.00           O  
ATOM    129  N   GLU A  34      20.040  16.148  21.017  1.00  0.00           N  
ATOM    130  CA  GLU A  34      19.465  16.956  19.960  1.00  0.00           C  
ATOM    131  C   GLU A  34      20.068  16.966  18.563  1.00  0.00           C  
ATOM    132  O   GLU A  34      19.498  17.554  17.647  1.00  0.00           O  
ATOM    133  N   GLY A  35      21.307  16.486  18.436  1.00  0.00           N  
ATOM    134  CA  GLY A  35      21.977  16.500  17.152  1.00  0.00           C  
ATOM    135  C   GLY A  35      22.664  17.827  16.861  1.00  0.00           C  
ATOM    136  O   GLY A  35      23.104  18.022  15.730  1.00  0.00           O  
ATOM    137  N   ILE A  36      22.758  18.806  17.765  1.00  0.00           N  
ATOM    138  CA  ILE A  36      23.302  20.144  17.658  1.00  0.00           C  
ATOM    139  C   ILE A  36      24.769  20.307  18.029  1.00  0.00           C  
ATOM    140  O   ILE A  36      25.032  20.106  19.213  1.00  0.00           O  
ATOM    141  N   PRO A  37      25.730  20.537  17.130  1.00  0.00           N  
ATOM    142  CA  PRO A  37      27.129  20.669  17.482  1.00  0.00           C  
ATOM    143  C   PRO A  37      27.401  21.842  18.413  1.00  0.00           C  
ATOM    144  O   PRO A  37      26.587  22.752  18.556  1.00  0.00           O  
ATOM    145  N   PRO A  38      28.529  21.830  19.127  1.00  0.00           N  
ATOM    146  CA  PRO A  38      28.819  22.791  20.171  1.00  0.00           C  
ATOM    147  C   PRO A  38      28.862  24.237  19.698  1.00  0.00           C  
ATOM    148  O   PRO A  38      28.505  25.090  20.508  1.00  0.00           O  
ATOM    149  N   ASP A  39      29.130  24.556  18.430  1.00  0.00           N  
ATOM    150  CA  ASP A  39      29.164  25.904  17.901  1.00  0.00           C  
ATOM    151  C   ASP A  39      27.818  26.486  17.488  1.00  0.00           C  
ATOM    152  O   ASP A  39      27.678  27.707  17.495  1.00  0.00           O  
ATOM    153  N   GLN A  40      26.817  25.610  17.378  1.00  0.00           N  
ATOM    154  CA  GLN A  40      25.420  25.978  17.270  1.00  0.00           C  
ATOM    155  C   GLN A  40      24.877  26.287  18.658  1.00  0.00           C  
ATOM    156  O   GLN A  40      23.888  27.014  18.693  1.00  0.00           O  
ATOM    157  N   GLN A  41      25.393  25.707  19.745  1.00  0.00           N  
ATOM    158  CA  GLN A  41      24.879  25.979  21.071  1.00  0.00           C  
ATOM    159  C   GLN A  41      25.611  27.128  21.750  1.00  0.00           C  
ATOM    160  O   GLN A  41      26.828  27.164  21.581  1.00  0.00           O  
ATOM    161  N   ARG A  42      24.899  27.943  22.533  1.00  0.00           N  
ATOM    162  CA  ARG A  42      25.479  28.742  23.593  1.00  0.00           C  
ATOM    163  C   ARG A  42      24.581  28.491  24.797  1.00  0.00           C  
ATOM    164  O   ARG A  42      23.372  28.573  24.599  1.00  0.00           O  
ATOM    165  N   LEU A  43      25.123  28.253  25.993  1.00  0.00           N  
ATOM    166  CA  LEU A  43      24.436  27.882  27.214  1.00  0.00           C  
ATOM    167  C   LEU A  43      24.367  29.172  28.018  1.00  0.00           C  
ATOM    168  O   LEU A  43      25.380  29.863  28.105  1.00  0.00           O  
ATOM    169  N   ILE A  44      23.183  29.544  28.511  1.00  0.00           N  
ATOM    170  CA  ILE A  44      22.921  30.693  29.354  1.00  0.00           C  
ATOM    171  C   ILE A  44      22.299  30.294  30.684  1.00  0.00           C  
ATOM    172  O   ILE A  44      21.661  29.258  30.858  1.00  0.00           O  
ATOM    173  N   PHE A  45      22.698  30.964  31.767  1.00  0.00           N  
ATOM    174  CA  PHE A  45      22.338  30.756  33.156  1.00  0.00           C  
ATOM    175  C   PHE A  45      22.229  32.086  33.886  1.00  0.00           C  
ATOM    176  O   PHE A  45      23.158  32.885  33.782  1.00  0.00           O  
ATOM    177  N   ALA A  46      21.074  32.402  34.475  1.00  0.00           N  
ATOM    178  CA  ALA A  46      20.800  33.592  35.254  1.00  0.00           C  
ATOM    179  C   ALA A  46      21.218  34.828  34.470  1.00  0.00           C  
ATOM    180  O   ALA A  46      21.989  35.676  34.913  1.00  0.00           O  
ATOM    181  N   GLY A  47      20.670  34.964  33.260  1.00  0.00           N  
ATOM    182  CA  GLY A  47      20.993  35.998  32.296  1.00  0.00           C  
ATOM    183  C   GLY A  47      22.468  36.181  31.969  1.00  0.00           C  
ATOM    184  O   GLY A  47      22.685  37.007  31.085  1.00  0.00           O  
ATOM    185  N   LYS A  48      23.375  35.259  32.301  1.00  0.00           N  
ATOM    186  CA  LYS A  48      24.749  35.226  31.845  1.00  0.00           C  
ATOM    187  C   LYS A  48      25.107  34.019  30.990  1.00  0.00           C  
ATOM    188  O   LYS A  48      24.577  32.926  31.179  1.00  0.00           O  
ATOM    189  N   GLN A  49      25.957  34.199  29.978  1.00  0.00           N  
ATOM    190  CA  GLN A  49      26.347  33.161  29.046  1.00  0.00           C  
ATOM    191  C   GLN A  49      27.456  32.359  29.712  1.00  0.00           C  
ATOM    192  O   GLN A  49      28.206  32.998  30.446  1.00  0.00           O  
ATOM    193  N   LEU A  50      27.520  31.064  29.395  1.00  0.00           N  
ATOM    194  CA  LEU A  50      28.506  30.096  29.834  1.00  0.00           C  
ATOM    195  C   LEU A  50      29.533  29.933  28.724  1.00  0.00           C  
ATOM    196  O   LEU A  50      29.179  29.252  27.765  1.00  0.00           O  
ATOM    197  N   GLU A  51      30.715  30.542  28.851  1.00  0.00           N  
ATOM    198  CA  GLU A  51      31.842  30.477  27.941  1.00  0.00           C  
ATOM    199  C   GLU A  51      32.580  29.152  28.064  1.00  0.00           C  
ATOM    200  O   GLU A  51      32.604  28.628  29.176  1.00  0.00           O  
ATOM    201  N   ASP A  52      33.236  28.602  27.040  1.00  0.00           N  
ATOM    202  CA  ASP A  52      33.410  27.191  26.755  1.00  0.00           C  
ATOM    203  C   ASP A  52      34.625  26.622  27.474  1.00  0.00           C  
ATOM    204  O   ASP A  52      34.625  25.519  28.015  1.00  0.00           O  
ATOM    205  N   GLY A  53      35.572  27.497  27.817  1.00  0.00           N  
ATOM    206  CA  GLY A  53      36.761  27.174  28.581  1.00  0.00           C  
ATOM    207  C   GLY A  53      36.699  27.053  30.096  1.00  0.00           C  
ATOM    208  O   GLY A  53      37.751  27.090  30.731  1.00  0.00           O  
ATOM    209  N   ARG A  54      35.496  27.134  30.670  1.00  0.00           N  
ATOM    210  CA  ARG A  54      35.228  26.961  32.083  1.00  0.00           C  
ATOM    211  C   ARG A  54      34.336  25.778  32.433  1.00  0.00           C  
ATOM    212  O   ARG A  54      33.875  25.036  31.569  1.00  0.00           O  
ATOM    213  N   THR A  55      34.269  25.518  33.741  1.00  0.00           N  
ATOM    214  CA  THR A  55      33.467  24.500  34.388  1.00  0.00           C  
ATOM    215  C   THR A  55      32.235  25.147  35.007  1.00  0.00           C  
ATOM    216  O   THR A  55      32.214  26.338  35.311  1.00  0.00           O  
ATOM    217  N   LEU A  56      31.327  24.220  35.322  1.00  0.00           N  
ATOM    218  CA  LEU A  56      30.183  24.314  36.206  1.00  0.00           C  
ATOM    219  C   LEU A  56      30.619  24.886  37.547  1.00  0.00           C  
ATOM    220  O   LEU A  56      29.753  25.565  38.095  1.00  0.00           O  
ATOM    221  N   SER A  57      31.752  24.575  38.183  1.00  0.00           N  
ATOM    222  CA  SER A  57      32.219  25.120  39.441  1.00  0.00           C  
ATOM    223  C   SER A  57      32.663  26.573  39.337  1.00  0.00           C  
ATOM    224  O   SER A  57      32.445  27.330  40.280  1.00  0.00           O  
ATOM    225  N   ASP A  58      33.099  27.154  38.218  1.00  0.00           N  
ATOM    226  CA  ASP A  58      33.478  28.543  38.044  1.00  0.00           C  
ATOM    227  C   ASP A  58      32.269  29.460  38.147  1.00  0.00           C  
ATOM    228  O   ASP A  58      32.331  30.576  38.660  1.00  0.00           O  
ATOM    229  N   TYR A  59      31.134  28.894  37.729  1.00  0.00           N  
ATOM    230  CA  TYR A  59      29.939  29.676  37.485  1.00  0.00           C  
ATOM    231  C   TYR A  59      29.028  29.304  38.646  1.00  0.00           C  
ATOM    232  O   TYR A  59      27.938  29.872  38.681  1.00  0.00           O  
ATOM    233  N   ASN A  60      29.361  28.413  39.583  1.00  0.00           N  
ATOM    234  CA  ASN A  60      28.553  27.951  40.692  1.00  0.00           C  
ATOM    235  C   ASN A  60      27.139  27.524  40.323  1.00  0.00           C  
ATOM    236  O   ASN A  60      26.132  28.059  40.783  1.00  0.00           O  
ATOM    237  N   ILE A  61      27.151  26.435  39.550  1.00  0.00           N  
ATOM    238  CA  ILE A  61      25.995  25.659  39.154  1.00  0.00           C  
ATOM    239  C   ILE A  61      25.919  24.400  40.006  1.00  0.00           C  
ATOM    240  O   ILE A  61      26.939  23.721  40.097  1.00  0.00           O  
ATOM    241  N   GLN A  62      24.759  23.914  40.451  1.00  0.00           N  
ATOM    242  CA  GLN A  62      24.504  22.690  41.186  1.00  0.00           C  
ATOM    243  C   GLN A  62      23.169  22.014  40.907  1.00  0.00           C  
ATOM    244  O   GLN A  62      22.430  22.440  40.021  1.00  0.00           O  
ATOM    245  N   LYS A  63      22.906  20.875  41.551  1.00  0.00           N  
ATOM    246  CA  LYS A  63      21.762  20.024  41.292  1.00  0.00           C  
ATOM    247  C   LYS A  63      20.453  20.670  40.858  1.00  0.00           C  
ATOM    248  O   LYS A  63      19.853  21.581  41.424  1.00  0.00           O  
ATOM    249  N   GLU A  64      20.058  20.166  39.687  1.00  0.00           N  
ATOM    250  CA  GLU A  64      18.932  20.591  38.881  1.00  0.00           C  
ATOM    251  C   GLU A  64      18.864  21.997  38.302  1.00  0.00           C  
ATOM    252  O   GLU A  64      17.884  22.427  37.699  1.00  0.00           O  
ATOM    253  N   SER A  65      19.948  22.771  38.388  1.00  0.00           N  
ATOM    254  CA  SER A  65      19.835  24.131  37.900  1.00  0.00           C  
ATOM    255  C   SER A  65      19.492  24.075  36.419  1.00  0.00           C  
ATOM    256  O   SER A  65      20.073  23.323  35.640  1.00  0.00           O  
ATOM    257  N   THR A  66      18.428  24.770  36.009  1.00  0.00           N  
ATOM    258  CA  THR A  66      17.957  24.838  34.640  1.00  0.00           C  
ATOM    259  C   THR A  66      18.605  25.961  33.844  1.00  0.00           C  
ATOM    260  O   THR A  66      18.573  27.153  34.145  1.00  0.00           O  
ATOM    261  N   LEU A  67      19.301  25.525  32.792  1.00  0.00           N  
ATOM    262  CA  LEU A  67      19.937  26.457  31.884  1.00  0.00           C  
ATOM    263  C   LEU A  67      19.045  26.545  30.654  1.00  0.00           C  
ATOM    264  O   LEU A  67      18.316  25.605  30.344  1.00  0.00           O  
ATOM    265  N   HIS A  68      19.140  27.654  29.918  1.00  0.00           N  
ATOM    266  CA  HIS A  68      18.493  27.853  28.637  1.00  0.00           C  
ATOM    267  C   HIS A  68      19.495  27.984  27.498  1.00  0.00           C  
ATOM    268  O   HIS A  68      19.935  29.112  27.286  1.00  0.00           O  
ATOM    269  N   LEU A  69      20.014  26.957  26.823  1.00  0.00           N  
ATOM    270  CA  LEU A  69      20.766  27.269  25.624  1.00  0.00           C  
ATOM    271  C   LEU A  69      20.051  28.061  24.538  1.00  0.00           C  
ATOM    272  O   LEU A  69      18.824  28.062  24.463  1.00  0.00           O  
ATOM    273  N   VAL A  70      20.750  28.704  23.600  1.00  0.00           N  
ATOM    274  CA  VAL A  70      20.175  29.343  22.434  1.00  0.00           C  
ATOM    275  C   VAL A  70      21.065  29.021  21.242  1.00  0.00           C  
ATOM    276  O   VAL A  70      22.190  28.539  21.356  1.00  0.00           O  
TER
ENDMDL
MODEL      10
ATOM      1  N   GLN A   2      22.797  15.827  38.364  1.00  0.00           N  
ATOM      2  CA  GLN A   2      21.822  16.241  37.375  1.00  0.00           C  
ATOM      3  C   GLN A   2      21.436  17.712  37.311  1.00  0.00           C  
ATOM      4  O   GLN A   2      21.079  18.278  38.342  1.00  0.00           O  
ATOM      5  N   ILE A   3      21.519  18.347  36.139  1.00  0.00           N  
ATOM      6  CA  ILE A   3      20.911  19.573  35.663  1.00  0.00           C  
ATOM      7  C   ILE A   3      19.780  19.376  34.663  1.00  0.00           C  
ATOM      8  O   ILE A   3      19.721  18.480  33.824  1.00  0.00           O  
ATOM      9  N   PHE A   4      19.029  20.479  34.611  1.00  0.00           N  
ATOM     10  CA  PHE A   4      18.076  20.595  33.524  1.00  0.00           C  
ATOM     11  C   PHE A   4      18.483  21.637  32.491  1.00  0.00           C  
ATOM     12  O   PHE A   4      19.265  22.547  32.752  1.00  0.00           O  
ATOM     13  N   VAL A   5      17.971  21.460  31.272  1.00  0.00           N  
ATOM     14  CA  VAL A   5      18.104  22.416  30.190  1.00  0.00           C  
ATOM     15  C   VAL A   5      16.783  22.797  29.539  1.00  0.00           C  
ATOM     16  O   VAL A   5      16.054  22.024  28.922  1.00  0.00           O  
ATOM     17  N   LYS A   6      16.361  24.063  29.541  1.00  0.00           N  
ATOM     18  CA  LYS A   6      15.245  24.629  28.808  1.00  0.00           C  
ATOM     19  C   LYS A   6      15.702  24.930  27.387  1.00  0.00           C  
ATOM     20  O   LYS A   6      16.646  25.688  27.179  1.00  0.00           O  
ATOM     21  N   THR A   7      14.854  24.493  26.452  1.00  0.00           N  
ATOM     22  CA  THR A   7      15.086  24.808  25.057  1.00  0.00           C  
ATOM     23  C   THR A   7      14.244  25.969  24.546  1.00  0.00           C  
ATOM     24  O   THR A   7      13.346  26.511  25.185  1.00  0.00           O  
ATOM     25  N   LEU A   8      14.595  26.375  23.323  1.00  0.00           N  
ATOM     26  CA  LEU A   8      13.766  27.423  22.763  1.00  0.00           C  
ATOM     27  C   LEU A   8      12.280  27.096  22.719  1.00  0.00           C  
ATOM     28  O   LEU A   8      11.456  27.856  23.221  1.00  0.00           O  
ATOM     29  N   THR A   9      11.920  25.947  22.140  1.00  0.00           N  
ATOM     30  CA  THR A   9      10.587  25.385  22.058  1.00  0.00           C  
ATOM     31  C   THR A   9      10.041  24.701  23.303  1.00  0.00           C  
ATOM     32  O   THR A   9       9.102  23.910  23.246  1.00  0.00           O  
ATOM     33  N   GLY A  10      10.535  24.972  24.514  1.00  0.00           N  
ATOM     34  CA  GLY A  10       9.850  24.655  25.751  1.00  0.00           C  
ATOM     35  C   GLY A  10      10.105  23.248  26.272  1.00  0.00           C  
ATOM     36  O   GLY A  10      10.044  23.088  27.490  1.00  0.00           O  
ATOM     37  N   LYS A  11      10.293  22.198  25.469  1.00  0.00           N  
ATOM     38  CA  LYS A  11      10.466  20.844  25.955  1.00  0.00           C  
ATOM     39  C   LYS A  11      11.774  20.865  26.734  1.00  0.00           C  
ATOM     40  O   LYS A  11      12.794  21.414  26.325  1.00  0.00           O  
ATOM     41  N   THR A  12      11.866  20.024  27.766  1.00  0.00           N  
ATOM     42  CA  THR A  12      13.031  19.866  28.612  1.00  0.00           C  
ATOM     43  C   THR A  12      13.745  18.542  28.373  1.00  0.00           C  
ATOM     44  O   THR A  12      13.132  17.522  28.070  1.00  0.00           O  
ATOM     45  N   ILE A  13      15.066  18.731  28.411  1.00  0.00           N  
ATOM     46  CA  ILE A  13      16.024  17.644  28.413  1.00  0.00           C  
ATOM     47  C   ILE A  13      16.787  17.531  29.725  1.00  0.00           C  
ATOM     48  O   ILE A  13      16.913  18.609  30.304  1.00  0.00           O  
ATOM     49  N   THR A  14      17.269  16.337  30.077  1.00  0.00           N  
ATOM     50  CA  THR A  14      18.034  16.088  31.282  1.00  0.00           C  
ATOM     51  C   THR A  14      19.457  15.666  30.944  1.00  0.00           C  
ATOM     52  O   THR A  14      19.743  15.025  29.935  1.00  0.00           O  
ATOM     53  N   LEU A  15      20.340  16.303  31.716  1.00  0.00           N  
ATOM     54  CA  LEU A  15      21.774  16.097  31.709  1.00  0.00           C  
ATOM     55  C   LEU A  15      22.317  15.534  33.015  1.00  0.00           C  
ATOM     56  O   LEU A  15      22.047  16.082  34.082  1.00  0.00           O  
ATOM     57  N   GLU A  16      23.219  14.567  32.833  1.00  0.00           N  
ATOM     58  CA  GLU A  16      24.126  14.146  33.881  1.00  0.00           C  
ATOM     59  C   GLU A  16      25.457  14.729  33.432  1.00  0.00           C  
ATOM     60  O   GLU A  16      25.810  14.474  32.282  1.00  0.00           O  
ATOM     61  N   VAL A  17      25.964  15.645  34.260  1.00  0.00           N  
ATOM     62  CA  VAL A  17      27.294  16.223  34.265  1.00  0.00           C  
ATOM     63  C   VAL A  17      27.904  16.342  35.653  1.00  0.00           C  
ATOM     64  O   VAL A  17      27.058  16.182  36.529  1.00  0.00           O  
ATOM     65  N   GLU A  18      29.189  16.359  36.016  1.00  0.00           N  
ATOM     66  CA  GLU A  18      29.651  16.398  37.390  1.00  0.00           C  
ATOM     67  C   GLU A  18      30.228  17.732  37.842  1.00  0.00           C  
ATOM     68  O   GLU A  18      30.365  18.631  37.014  1.00  0.00           O  
ATOM     69  N   PRO A  19      30.592  17.984  39.101  1.00  0.00           N  
ATOM     70  CA  PRO A  19      31.232  19.231  39.471  1.00  0.00           C  
ATOM     71  C   PRO A  19      32.533  19.615  38.783  1.00  0.00           C  
ATOM     72  O   PRO A  19      32.739  20.789  38.483  1.00  0.00           O  
ATOM     73  N   SER A  20      33.476  18.734  38.440  1.00  0.00           N  
ATOM     74  CA  SER A  20      34.730  18.983  37.759  1.00  0.00           C  
ATOM     75  C   SER A  20      34.554  18.985  36.246  1.00  0.00           C  
ATOM     76  O   SER A  20      35.555  19.105  35.546  1.00  0.00           O  
ATOM     77  N   ASP A  21      33.319  18.880  35.751  1.00  0.00           N  
ATOM     78  CA  ASP A  21      33.023  18.771  34.336  1.00  0.00           C  
ATOM     79  C   ASP A  21      33.241  20.138  33.705  1.00  0.00           C  
ATOM     80  O   ASP A  21      32.837  21.167  34.241  1.00  0.00           O  
ATOM     81  N   THR A  22      33.876  20.142  32.530  1.00  0.00           N  
ATOM     82  CA  THR A  22      33.914  21.294  31.653  1.00  0.00           C  
ATOM     83  C   THR A  22      32.697  21.819  30.903  1.00  0.00           C  
ATOM     84  O   THR A  22      31.842  21.031  30.507  1.00  0.00           O  
ATOM     85  N   ILE A  23      32.563  23.124  30.651  1.00  0.00           N  
ATOM     86  CA  ILE A  23      31.515  23.672  29.814  1.00  0.00           C  
ATOM     87  C   ILE A  23      31.465  23.023  28.438  1.00  0.00           C  
ATOM     88  O   ILE A  23      30.417  22.655  27.912  1.00  0.00           O  
ATOM     89  N   GLU A  24      32.624  22.832  27.804  1.00  0.00           N  
ATOM     90  CA  GLU A  24      32.649  22.056  26.581  1.00  0.00           C  
ATOM     91  C   GLU A  24      32.125  20.635  26.729  1.00  0.00           C  
ATOM     92  O   GLU A  24      31.620  20.107  25.741  1.00  0.00           O  
ATOM     93  N   ASN A  25      32.158  19.946  27.872  1.00  0.00           N  
ATOM     94  CA  ASN A  25      31.664  18.592  28.023  1.00  0.00           C  
ATOM     95  C   ASN A  25      30.154  18.578  28.218  1.00  0.00           C  
ATOM     96  O   ASN A  25      29.513  17.628  27.774  1.00  0.00           O  
ATOM     97  N   VAL A  26      29.533  19.646  28.721  1.00  0.00           N  
ATOM     98  CA  VAL A  26      28.118  19.914  28.564  1.00  0.00           C  
ATOM     99  C   VAL A  26      27.770  19.897  27.082  1.00  0.00           C  
ATOM    100  O   VAL A  26      26.881  19.166  26.651  1.00  0.00           O  
ATOM    101  N   LYS A  27      28.458  20.571  26.158  1.00  0.00           N  
ATOM    102  CA  LYS A  27      28.145  20.678  24.748  1.00  0.00           C  
ATOM    103  C   LYS A  27      28.309  19.377  23.974  1.00  0.00           C  
ATOM    104  O   LYS A  27      27.350  19.248  23.216  1.00  0.00           O  
ATOM    105  N   ALA A  28      29.183  18.418  24.285  1.00  0.00           N  
ATOM    106  CA  ALA A  28      29.052  17.171  23.558  1.00  0.00           C  
ATOM    107  C   ALA A  28      27.775  16.416  23.900  1.00  0.00           C  
ATOM    108  O   ALA A  28      27.127  15.853  23.021  1.00  0.00           O  
ATOM    109  N   LYS A  29      27.394  16.419  25.179  1.00  0.00           N  
ATOM    110  CA  LYS A  29      26.188  15.770  25.654  1.00  0.00           C  
ATOM    111  C   LYS A  29      24.877  16.385  25.185  1.00  0.00           C  
ATOM    112  O   LYS A  29      23.884  15.701  24.944  1.00  0.00           O  
ATOM    113  N   ILE A  30      24.838  17.719  25.175  1.00  0.00           N  
ATOM    114  CA  ILE A  30      23.788  18.360  24.409  1.00  0.00           C  
ATOM    115  C   ILE A  30      23.819  17.931  22.948  1.00  0.00           C  
ATOM    116  O   ILE A  30      22.756  17.681  22.385  1.00  0.00           O  
ATOM    117  N   GLN A  31      24.954  17.857  22.249  1.00  0.00           N  
ATOM    118  CA  GLN A  31      24.995  17.322  20.902  1.00  0.00           C  
ATOM    119  C   GLN A  31      24.499  15.890  20.771  1.00  0.00           C  
ATOM    120  O   GLN A  31      23.883  15.622  19.742  1.00  0.00           O  
ATOM    121  N   ASP A  32      24.755  14.978  21.713  1.00  0.00           N  
ATOM    122  CA  ASP A  32      24.329  13.595  21.788  1.00  0.00           C  
ATOM    123  C   ASP A  32      22.812  13.559  21.900  1.00  0.00           C  
ATOM    124  O   ASP A  32      22.068  12.778  21.309  1.00  0.00           O  
ATOM    125  N   LYS A  33      22.236  14.522  22.624  1.00  0.00           N  
ATOM    126  CA  LYS A  33      20.820  14.412  22.908  1.00  0.00           C  
ATOM    127  C   LYS A  33      19.965  14.943  21.767  1.00  0.00           C  
ATOM    128  O   LYS A  33      18.938  14.445  21.315  1.00  0.00           O  
ATOM    129  N   GLU A  34      20.309  16.093  21.182  1.00  0.00           N  
ATOM    130  CA  GLU A  34      19.646  16.998  20.266  1.00  0.00           C  
ATOM    131  C   GLU A  34      20.210  17.188  18.865  1.00  0.00           C  
ATOM    132  O   GLU A  34      19.626  17.715  17.921  1.00  0.00           O  
ATOM    133  N   GLY A  35      21.404  16.619  18.684  1.00  0.00           N  
ATOM    134  CA  GLY A  35      22.124  16.639  17.428  1.00  0.00           C  
ATOM    135  C   GLY A  35      22.432  17.977  16.770  1.00  0.00           C  
ATOM    136  O   GLY A  35      22.809  17.890  15.604  1.00  0.00           O  
ATOM    137  N   ILE A  36      22.181  19.108  17.433  1.00  0.00           N  
ATOM    138  CA  ILE A  36      22.773  20.417  17.246  1.00  0.00           C  
ATOM    139  C   ILE A  36      24.182  20.698  17.747  1.00  0.00           C  
ATOM    140  O   ILE A  36      24.551  20.527  18.907  1.00  0.00           O  
ATOM    141  N   PRO A  37      25.006  21.296  16.883  1.00  0.00           N  
ATOM    142  CA  PRO A  37      26.450  21.310  17.004  1.00  0.00           C  
ATOM    143  C   PRO A  37      26.944  22.507  17.804  1.00  0.00           C  
ATOM    144  O   PRO A  37      26.286  23.545  17.820  1.00  0.00           O  
ATOM    145  N   PRO A  38      28.117  22.389  18.431  1.00  0.00           N  
ATOM    146  CA  PRO A  38      28.704  23.385  19.305  1.00  0.00           C  
ATOM    147  C   PRO A  38      28.654  24.836  18.850  1.00  0.00           C  
ATOM    148  O   PRO A  38      28.154  25.671  19.600  1.00  0.00           O  
ATOM    149  N   ASP A  39      28.978  25.108  17.584  1.00  0.00           N  
ATOM    150  CA  ASP A  39      28.869  26.348  16.842  1.00  0.00           C  
ATOM    151  C   ASP A  39      27.427  26.833  16.891  1.00  0.00           C  
ATOM    152  O   ASP A  39      27.300  28.051  16.784  1.00  0.00           O  
ATOM    153  N   GLN A  40      26.293  26.140  17.014  1.00  0.00           N  
ATOM    154  CA  GLN A  40      24.966  26.722  16.989  1.00  0.00           C  
ATOM    155  C   GLN A  40      24.339  26.703  18.376  1.00  0.00           C  
ATOM    156  O   GLN A  40      23.250  27.240  18.563  1.00  0.00           O  
ATOM    157  N   GLN A  41      24.983  26.179  19.422  1.00  0.00           N  
ATOM    158  CA  GLN A  41      24.665  26.320  20.829  1.00  0.00           C  
ATOM    159  C   GLN A  41      25.260  27.585  21.430  1.00  0.00           C  
ATOM    160  O   GLN A  41      26.459  27.828  21.320  1.00  0.00           O  
ATOM    161  N   ARG A  42      24.396  28.318  22.137  1.00  0.00           N  
ATOM    162  CA  ARG A  42      24.740  29.140  23.278  1.00  0.00           C  
ATOM    163  C   ARG A  42      24.224  28.343  24.468  1.00  0.00           C  
ATOM    164  O   ARG A  42      23.101  27.845  24.460  1.00  0.00           O  
ATOM    165  N   LEU A  43      24.944  28.247  25.588  1.00  0.00           N  
ATOM    166  CA  LEU A  43      24.424  27.984  26.915  1.00  0.00           C  
ATOM    167  C   LEU A  43      24.369  29.235  27.780  1.00  0.00           C  
ATOM    168  O   LEU A  43      25.169  30.156  27.632  1.00  0.00           O  
ATOM    169  N   ILE A  44      23.282  29.469  28.518  1.00  0.00           N  
ATOM    170  CA  ILE A  44      22.820  30.632  29.247  1.00  0.00           C  
ATOM    171  C   ILE A  44      22.336  30.184  30.619  1.00  0.00           C  
ATOM    172  O   ILE A  44      21.591  29.215  30.749  1.00  0.00           O  
ATOM    173  N   PHE A  45      22.729  31.003  31.597  1.00  0.00           N  
ATOM    174  CA  PHE A  45      22.482  30.729  32.998  1.00  0.00           C  
ATOM    175  C   PHE A  45      22.566  31.958  33.891  1.00  0.00           C  
ATOM    176  O   PHE A  45      23.524  32.722  33.816  1.00  0.00           O  
ATOM    177  N   ALA A  46      21.665  32.107  34.865  1.00  0.00           N  
ATOM    178  CA  ALA A  46      21.412  33.293  35.657  1.00  0.00           C  
ATOM    179  C   ALA A  46      21.686  34.587  34.902  1.00  0.00           C  
ATOM    180  O   ALA A  46      22.465  35.373  35.436  1.00  0.00           O  
ATOM    181  N   GLY A  47      21.261  34.644  33.638  1.00  0.00           N  
ATOM    182  CA  GLY A  47      21.492  35.710  32.683  1.00  0.00           C  
ATOM    183  C   GLY A  47      22.806  35.794  31.922  1.00  0.00           C  
ATOM    184  O   GLY A  47      22.988  36.836  31.294  1.00  0.00           O  
ATOM    185  N   LYS A  48      23.740  34.864  32.139  1.00  0.00           N  
ATOM    186  CA  LYS A  48      25.114  34.907  31.683  1.00  0.00           C  
ATOM    187  C   LYS A  48      25.628  33.791  30.785  1.00  0.00           C  
ATOM    188  O   LYS A  48      25.290  32.625  30.979  1.00  0.00           O  
ATOM    189  N   GLN A  49      26.115  34.198  29.611  1.00  0.00           N  
ATOM    190  CA  GLN A  49      26.556  33.157  28.704  1.00  0.00           C  
ATOM    191  C   GLN A  49      27.792  32.350  29.073  1.00  0.00           C  
ATOM    192  O   GLN A  49      28.824  32.941  29.383  1.00  0.00           O  
ATOM    193  N   LEU A  50      27.750  31.016  29.073  1.00  0.00           N  
ATOM    194  CA  LEU A  50      28.714  30.129  29.693  1.00  0.00           C  
ATOM    195  C   LEU A  50      29.965  30.138  28.828  1.00  0.00           C  
ATOM    196  O   LEU A  50      29.794  30.221  27.614  1.00  0.00           O  
ATOM    197  N   GLU A  51      31.172  30.037  29.392  1.00  0.00           N  
ATOM    198  CA  GLU A  51      32.452  30.132  28.720  1.00  0.00           C  
ATOM    199  C   GLU A  51      33.318  28.918  28.414  1.00  0.00           C  
ATOM    200  O   GLU A  51      33.472  28.288  29.459  1.00  0.00           O  
ATOM    201  N   ASP A  52      33.943  28.796  27.241  1.00  0.00           N  
ATOM    202  CA  ASP A  52      34.270  27.472  26.752  1.00  0.00           C  
ATOM    203  C   ASP A  52      35.438  26.739  27.398  1.00  0.00           C  
ATOM    204  O   ASP A  52      35.455  25.531  27.171  1.00  0.00           O  
ATOM    205  N   GLY A  53      36.274  27.367  28.227  1.00  0.00           N  
ATOM    206  CA  GLY A  53      37.362  26.644  28.856  1.00  0.00           C  
ATOM    207  C   GLY A  53      37.093  26.374  30.329  1.00  0.00           C  
ATOM    208  O   GLY A  53      38.003  25.943  31.034  1.00  0.00           O  
ATOM    209  N   ARG A  54      35.893  26.696  30.817  1.00  0.00           N  
ATOM    210  CA  ARG A  54      35.631  26.735  32.241  1.00  0.00           C  
ATOM    211  C   ARG A  54      34.843  25.511  32.687  1.00  0.00           C  
ATOM    212  O   ARG A  54      34.070  24.932  31.927  1.00  0.00           O  
ATOM    213  N   THR A  55      34.923  25.197  33.982  1.00  0.00           N  
ATOM    214  CA  THR A  55      34.068  24.235  34.647  1.00  0.00           C  
ATOM    215  C   THR A  55      32.745  24.846  35.086  1.00  0.00           C  
ATOM    216  O   THR A  55      32.580  26.022  35.401  1.00  0.00           O  
ATOM    217  N   LEU A  56      31.775  23.935  35.198  1.00  0.00           N  
ATOM    218  CA  LEU A  56      30.478  24.139  35.812  1.00  0.00           C  
ATOM    219  C   LEU A  56      30.577  24.740  37.207  1.00  0.00           C  
ATOM    220  O   LEU A  56      29.855  25.721  37.368  1.00  0.00           O  
ATOM    221  N   SER A  57      31.453  24.223  38.072  1.00  0.00           N  
ATOM    222  CA  SER A  57      31.820  24.785  39.356  1.00  0.00           C  
ATOM    223  C   SER A  57      32.178  26.263  39.290  1.00  0.00           C  
ATOM    224  O   SER A  57      31.773  27.008  40.179  1.00  0.00           O  
ATOM    225  N   ASP A  58      32.752  26.815  38.219  1.00  0.00           N  
ATOM    226  CA  ASP A  58      33.126  28.214  38.177  1.00  0.00           C  
ATOM    227  C   ASP A  58      31.954  29.186  38.238  1.00  0.00           C  
ATOM    228  O   ASP A  58      31.980  30.273  38.810  1.00  0.00           O  
ATOM    229  N   TYR A  59      30.807  28.731  37.730  1.00  0.00           N  
ATOM    230  CA  TYR A  59      29.551  29.452  37.705  1.00  0.00           C  
ATOM    231  C   TYR A  59      28.768  29.176  38.982  1.00  0.00           C  
ATOM    232  O   TYR A  59      27.729  29.828  39.059  1.00  0.00           O  
ATOM    233  N   ASN A  60      29.093  28.321  39.954  1.00  0.00           N  
ATOM    234  CA  ASN A  60      28.224  27.754  40.964  1.00  0.00           C  
ATOM    235  C   ASN A  60      26.872  27.351  40.392  1.00  0.00           C  
ATOM    236  O   ASN A  60      25.902  27.740  41.039  1.00  0.00           O  
ATOM    237  N   ILE A  61      26.914  26.499  39.364  1.00  0.00           N  
ATOM    238  CA  ILE A  61      25.787  25.826  38.753  1.00  0.00           C  
ATOM    239  C   ILE A  61      25.572  24.698  39.754  1.00  0.00           C  
ATOM    240  O   ILE A  61      26.530  24.045  40.162  1.00  0.00           O  
ATOM    241  N   GLN A  62      24.381  24.143  39.989  1.00  0.00           N  
ATOM    242  CA  GLN A  62      24.017  23.271  41.087  1.00  0.00           C  
ATOM    243  C   GLN A  62      22.981  22.247  40.648  1.00  0.00           C  
ATOM    244  O   GLN A  62      22.261  22.457  39.674  1.00  0.00           O  
ATOM    245  N   LYS A  63      23.012  21.170  41.437  1.00  0.00           N  
ATOM    246  CA  LYS A  63      21.911  20.228  41.461  1.00  0.00           C  
ATOM    247  C   LYS A  63      20.491  20.713  41.207  1.00  0.00           C  
ATOM    248  O   LYS A  63      19.831  21.451  41.934  1.00  0.00           O  
ATOM    249  N   GLU A  64      19.769  20.068  40.288  1.00  0.00           N  
ATOM    250  CA  GLU A  64      18.513  20.283  39.598  1.00  0.00           C  
ATOM    251  C   GLU A  64      18.222  21.736  39.248  1.00  0.00           C  
ATOM    252  O   GLU A  64      17.016  21.949  39.156  1.00  0.00           O  
ATOM    253  N   SER A  65      19.166  22.669  39.106  1.00  0.00           N  
ATOM    254  CA  SER A  65      19.043  23.858  38.286  1.00  0.00           C  
ATOM    255  C   SER A  65      18.979  23.812  36.767  1.00  0.00           C  
ATOM    256  O   SER A  65      19.331  22.805  36.156  1.00  0.00           O  
ATOM    257  N   THR A  66      19.013  24.911  36.010  1.00  0.00           N  
ATOM    258  CA  THR A  66      18.597  25.080  34.633  1.00  0.00           C  
ATOM    259  C   THR A  66      19.435  26.130  33.916  1.00  0.00           C  
ATOM    260  O   THR A  66      19.605  27.276  34.323  1.00  0.00           O  
ATOM    261  N   LEU A  67      20.007  25.669  32.801  1.00  0.00           N  
ATOM    262  CA  LEU A  67      20.596  26.466  31.745  1.00  0.00           C  
ATOM    263  C   LEU A  67      19.562  26.604  30.636  1.00  0.00           C  
ATOM    264  O   LEU A  67      18.716  25.739  30.416  1.00  0.00           O  
ATOM    265  N   HIS A  68      19.429  27.721  29.918  1.00  0.00           N  
ATOM    266  CA  HIS A  68      18.652  27.868  28.705  1.00  0.00           C  
ATOM    267  C   HIS A  68      19.556  27.705  27.491  1.00  0.00           C  
ATOM    268  O   HIS A  68      20.712  28.113  27.580  1.00  0.00           O  
ATOM    269  N   LEU A  69      18.942  27.175  26.431  1.00  0.00           N  
ATOM    270  CA  LEU A  69      19.542  26.801  25.166  1.00  0.00           C  
ATOM    271  C   LEU A  69      18.961  27.669  24.058  1.00  0.00           C  
ATOM    272  O   LEU A  69      17.781  27.483  23.771  1.00  0.00           O  
ATOM    273  N   VAL A  70      19.764  28.559  23.469  1.00  0.00           N  
ATOM    274  CA  VAL A  70      19.362  29.255  22.264  1.00  0.00           C  
ATOM    275  C   VAL A  70      19.929  28.649  20.988  1.00  0.00           C  
ATOM    276  O   VAL A  70      21.104  28.292  21.042  1.00  0.00           O  
TER
ENDMDL
MODEL      11
ATOM      1  N   GLN A   2      22.854  15.846  38.630  1.00  0.00           N  
ATOM      2  CA  GLN A   2      22.122  16.093  37.403  1.00  0.00           C  
ATOM      3  C   GLN A   2      21.680  17.544  37.282  1.00  0.00           C  
ATOM      4  O   GLN A   2      21.241  18.079  38.296  1.00  0.00           O  
ATOM      5  N   ILE A   3      21.869  18.161  36.113  1.00  0.00           N  
ATOM      6  CA  ILE A   3      21.402  19.441  35.622  1.00  0.00           C  
ATOM      7  C   ILE A   3      20.421  19.342  34.462  1.00  0.00           C  
ATOM      8  O   ILE A   3      20.362  18.355  33.733  1.00  0.00           O  
ATOM      9  N   PHE A   4      19.611  20.366  34.184  1.00  0.00           N  
ATOM     10  CA  PHE A   4      18.877  20.364  32.934  1.00  0.00           C  
ATOM     11  C   PHE A   4      19.353  21.437  31.965  1.00  0.00           C  
ATOM     12  O   PHE A   4      19.895  22.450  32.402  1.00  0.00           O  
ATOM     13  N   VAL A   5      18.942  21.267  30.707  1.00  0.00           N  
ATOM     14  CA  VAL A   5      18.804  22.349  29.753  1.00  0.00           C  
ATOM     15  C   VAL A   5      17.481  22.312  29.001  1.00  0.00           C  
ATOM     16  O   VAL A   5      17.145  21.286  28.415  1.00  0.00           O  
ATOM     17  N   LYS A   6      16.757  23.432  28.937  1.00  0.00           N  
ATOM     18  CA  LYS A   6      15.534  23.634  28.187  1.00  0.00           C  
ATOM     19  C   LYS A   6      15.980  24.080  26.802  1.00  0.00           C  
ATOM     20  O   LYS A   6      16.572  25.153  26.722  1.00  0.00           O  
ATOM     21  N   THR A   7      15.696  23.336  25.731  1.00  0.00           N  
ATOM     22  CA  THR A   7      16.065  23.790  24.405  1.00  0.00           C  
ATOM     23  C   THR A   7      15.096  24.831  23.863  1.00  0.00           C  
ATOM     24  O   THR A   7      14.097  25.130  24.513  1.00  0.00           O  
ATOM     25  N   LEU A   8      15.330  25.223  22.608  1.00  0.00           N  
ATOM     26  CA  LEU A   8      14.476  26.243  22.032  1.00  0.00           C  
ATOM     27  C   LEU A   8      12.986  25.937  21.985  1.00  0.00           C  
ATOM     28  O   LEU A   8      12.159  26.764  22.361  1.00  0.00           O  
ATOM     29  N   THR A   9      12.650  24.733  21.517  1.00  0.00           N  
ATOM     30  CA  THR A   9      11.247  24.365  21.505  1.00  0.00           C  
ATOM     31  C   THR A   9      10.614  23.809  22.773  1.00  0.00           C  
ATOM     32  O   THR A   9       9.435  23.464  22.742  1.00  0.00           O  
ATOM     33  N   GLY A  10      11.316  23.904  23.905  1.00  0.00           N  
ATOM     34  CA  GLY A  10      10.782  23.939  25.251  1.00  0.00           C  
ATOM     35  C   GLY A  10      10.670  22.557  25.879  1.00  0.00           C  
ATOM     36  O   GLY A  10      10.101  22.433  26.961  1.00  0.00           O  
ATOM     37  N   LYS A  11      11.170  21.529  25.191  1.00  0.00           N  
ATOM     38  CA  LYS A  11      11.598  20.262  25.749  1.00  0.00           C  
ATOM     39  C   LYS A  11      12.576  20.687  26.835  1.00  0.00           C  
ATOM     40  O   LYS A  11      13.421  21.552  26.616  1.00  0.00           O  
ATOM     41  N   THR A  12      12.550  20.033  27.999  1.00  0.00           N  
ATOM     42  CA  THR A  12      13.625  20.128  28.967  1.00  0.00           C  
ATOM     43  C   THR A  12      14.263  18.763  29.178  1.00  0.00           C  
ATOM     44  O   THR A  12      13.627  17.831  29.665  1.00  0.00           O  
ATOM     45  N   ILE A  13      15.555  18.655  28.858  1.00  0.00           N  
ATOM     46  CA  ILE A  13      16.317  17.422  28.876  1.00  0.00           C  
ATOM     47  C   ILE A  13      17.126  17.165  30.140  1.00  0.00           C  
ATOM     48  O   ILE A  13      17.594  18.105  30.779  1.00  0.00           O  
ATOM     49  N   THR A  14      17.451  15.931  30.531  1.00  0.00           N  
ATOM     50  CA  THR A  14      18.151  15.533  31.735  1.00  0.00           C  
ATOM     51  C   THR A  14      19.569  15.124  31.366  1.00  0.00           C  
ATOM     52  O   THR A  14      19.729  14.103  30.700  1.00  0.00           O  
ATOM     53  N   LEU A  15      20.483  15.902  31.952  1.00  0.00           N  
ATOM     54  CA  LEU A  15      21.909  15.815  31.711  1.00  0.00           C  
ATOM     55  C   LEU A  15      22.576  15.290  32.974  1.00  0.00           C  
ATOM     56  O   LEU A  15      22.445  15.796  34.087  1.00  0.00           O  
ATOM     57  N   GLU A  16      23.413  14.257  32.845  1.00  0.00           N  
ATOM     58  CA  GLU A  16      24.003  13.485  33.921  1.00  0.00           C  
ATOM     59  C   GLU A  16      25.501  13.738  34.011  1.00  0.00           C  
ATOM     60  O   GLU A  16      26.281  13.361  33.140  1.00  0.00           O  
ATOM     61  N   VAL A  17      25.824  14.646  34.934  1.00  0.00           N  
ATOM     62  CA  VAL A  17      27.044  15.425  34.991  1.00  0.00           C  
ATOM     63  C   VAL A  17      27.728  15.349  36.348  1.00  0.00           C  
ATOM     64  O   VAL A  17      27.273  14.764  37.328  1.00  0.00           O  
ATOM     65  N   GLU A  18      28.755  16.184  36.524  1.00  0.00           N  
ATOM     66  CA  GLU A  18      29.540  16.391  37.724  1.00  0.00           C  
ATOM     67  C   GLU A  18      30.179  17.772  37.752  1.00  0.00           C  
ATOM     68  O   GLU A  18      30.496  18.260  36.669  1.00  0.00           O  
ATOM     69  N   PRO A  19      30.366  18.400  38.915  1.00  0.00           N  
ATOM     70  CA  PRO A  19      30.812  19.779  38.940  1.00  0.00           C  
ATOM     71  C   PRO A  19      32.158  20.046  38.281  1.00  0.00           C  
ATOM     72  O   PRO A  19      32.463  21.159  37.858  1.00  0.00           O  
ATOM     73  N   SER A  20      33.016  19.047  38.060  1.00  0.00           N  
ATOM     74  CA  SER A  20      34.197  18.982  37.224  1.00  0.00           C  
ATOM     75  C   SER A  20      34.019  19.235  35.733  1.00  0.00           C  
ATOM     76  O   SER A  20      34.995  19.469  35.025  1.00  0.00           O  
ATOM     77  N   ASP A  21      32.872  18.946  35.116  1.00  0.00           N  
ATOM     78  CA  ASP A  21      32.690  18.915  33.678  1.00  0.00           C  
ATOM     79  C   ASP A  21      32.817  20.308  33.080  1.00  0.00           C  
ATOM     80  O   ASP A  21      32.234  21.290  33.536  1.00  0.00           O  
ATOM     81  N   THR A  22      33.505  20.414  31.940  1.00  0.00           N  
ATOM     82  CA  THR A  22      33.667  21.583  31.100  1.00  0.00           C  
ATOM     83  C   THR A  22      32.408  22.018  30.363  1.00  0.00           C  
ATOM     84  O   THR A  22      31.509  21.209  30.141  1.00  0.00           O  
ATOM     85  N   ILE A  23      32.240  23.260  29.904  1.00  0.00           N  
ATOM     86  CA  ILE A  23      31.100  23.715  29.133  1.00  0.00           C  
ATOM     87  C   ILE A  23      31.057  23.201  27.701  1.00  0.00           C  
ATOM     88  O   ILE A  23      29.981  22.816  27.249  1.00  0.00           O  
ATOM     89  N   GLU A  24      32.193  23.025  27.019  1.00  0.00           N  
ATOM     90  CA  GLU A  24      32.229  22.080  25.922  1.00  0.00           C  
ATOM     91  C   GLU A  24      31.725  20.681  26.250  1.00  0.00           C  
ATOM     92  O   GLU A  24      31.045  20.074  25.426  1.00  0.00           O  
ATOM     93  N   ASN A  25      31.894  20.095  27.437  1.00  0.00           N  
ATOM     94  CA  ASN A  25      31.427  18.764  27.766  1.00  0.00           C  
ATOM     95  C   ASN A  25      29.910  18.794  27.886  1.00  0.00           C  
ATOM     96  O   ASN A  25      29.173  18.030  27.267  1.00  0.00           O  
ATOM     97  N   VAL A  26      29.301  19.829  28.470  1.00  0.00           N  
ATOM     98  CA  VAL A  26      27.870  20.015  28.612  1.00  0.00           C  
ATOM     99  C   VAL A  26      27.232  19.933  27.233  1.00  0.00           C  
ATOM    100  O   VAL A  26      26.417  19.045  26.995  1.00  0.00           O  
ATOM    101  N   LYS A  27      27.665  20.818  26.330  1.00  0.00           N  
ATOM    102  CA  LYS A  27      27.080  20.885  25.006  1.00  0.00           C  
ATOM    103  C   LYS A  27      27.292  19.637  24.161  1.00  0.00           C  
ATOM    104  O   LYS A  27      26.368  19.329  23.412  1.00  0.00           O  
ATOM    105  N   ALA A  28      28.447  18.979  24.286  1.00  0.00           N  
ATOM    106  CA  ALA A  28      28.507  17.670  23.668  1.00  0.00           C  
ATOM    107  C   ALA A  28      27.522  16.625  24.172  1.00  0.00           C  
ATOM    108  O   ALA A  28      27.123  15.829  23.326  1.00  0.00           O  
ATOM    109  N   LYS A  29      27.019  16.712  25.406  1.00  0.00           N  
ATOM    110  CA  LYS A  29      25.931  15.906  25.923  1.00  0.00           C  
ATOM    111  C   LYS A  29      24.617  16.435  25.367  1.00  0.00           C  
ATOM    112  O   LYS A  29      23.720  15.653  25.060  1.00  0.00           O  
ATOM    113  N   ILE A  30      24.406  17.753  25.378  1.00  0.00           N  
ATOM    114  CA  ILE A  30      23.280  18.285  24.637  1.00  0.00           C  
ATOM    115  C   ILE A  30      23.152  17.796  23.202  1.00  0.00           C  
ATOM    116  O   ILE A  30      22.070  17.403  22.771  1.00  0.00           O  
ATOM    117  N   GLN A  31      24.202  17.752  22.378  1.00  0.00           N  
ATOM    118  CA  GLN A  31      24.365  17.168  21.063  1.00  0.00           C  
ATOM    119  C   GLN A  31      23.974  15.696  21.059  1.00  0.00           C  
ATOM    120  O   GLN A  31      23.168  15.355  20.197  1.00  0.00           O  
ATOM    121  N   ASP A  32      24.378  14.924  22.071  1.00  0.00           N  
ATOM    122  CA  ASP A  32      24.085  13.513  22.225  1.00  0.00           C  
ATOM    123  C   ASP A  32      22.596  13.217  22.338  1.00  0.00           C  
ATOM    124  O   ASP A  32      22.164  12.246  21.722  1.00  0.00           O  
ATOM    125  N   LYS A  33      21.769  13.993  23.042  1.00  0.00           N  
ATOM    126  CA  LYS A  33      20.343  13.767  23.163  1.00  0.00           C  
ATOM    127  C   LYS A  33      19.529  14.511  22.115  1.00  0.00           C  
ATOM    128  O   LYS A  33      18.530  14.018  21.595  1.00  0.00           O  
ATOM    129  N   GLU A  34      19.779  15.788  21.817  1.00  0.00           N  
ATOM    130  CA  GLU A  34      19.135  16.705  20.898  1.00  0.00           C  
ATOM    131  C   GLU A  34      19.551  16.998  19.464  1.00  0.00           C  
ATOM    132  O   GLU A  34      18.791  17.487  18.631  1.00  0.00           O  
ATOM    133  N   GLY A  35      20.817  16.656  19.213  1.00  0.00           N  
ATOM    134  CA  GLY A  35      21.313  16.840  17.864  1.00  0.00           C  
ATOM    135  C   GLY A  35      21.622  18.265  17.425  1.00  0.00           C  
ATOM    136  O   GLY A  35      21.517  18.415  16.210  1.00  0.00           O  
ATOM    137  N   ILE A  36      21.906  19.206  18.330  1.00  0.00           N  
ATOM    138  CA  ILE A  36      22.363  20.558  18.081  1.00  0.00           C  
ATOM    139  C   ILE A  36      23.885  20.579  18.125  1.00  0.00           C  
ATOM    140  O   ILE A  36      24.472  20.260  19.156  1.00  0.00           O  
ATOM    141  N   PRO A  37      24.492  21.201  17.111  1.00  0.00           N  
ATOM    142  CA  PRO A  37      25.934  21.349  17.103  1.00  0.00           C  
ATOM    143  C   PRO A  37      26.581  22.264  18.131  1.00  0.00           C  
ATOM    144  O   PRO A  37      25.988  23.249  18.568  1.00  0.00           O  
ATOM    145  N   PRO A  38      27.825  22.036  18.560  1.00  0.00           N  
ATOM    146  CA  PRO A  38      28.475  22.770  19.626  1.00  0.00           C  
ATOM    147  C   PRO A  38      28.609  24.262  19.355  1.00  0.00           C  
ATOM    148  O   PRO A  38      28.168  25.059  20.179  1.00  0.00           O  
ATOM    149  N   ASP A  39      29.096  24.633  18.168  1.00  0.00           N  
ATOM    150  CA  ASP A  39      29.223  25.986  17.666  1.00  0.00           C  
ATOM    151  C   ASP A  39      28.107  27.003  17.863  1.00  0.00           C  
ATOM    152  O   ASP A  39      28.314  28.093  18.394  1.00  0.00           O  
ATOM    153  N   GLN A  40      26.876  26.622  17.515  1.00  0.00           N  
ATOM    154  CA  GLN A  40      25.725  27.503  17.480  1.00  0.00           C  
ATOM    155  C   GLN A  40      25.048  27.826  18.803  1.00  0.00           C  
ATOM    156  O   GLN A  40      24.516  28.929  18.912  1.00  0.00           O  
ATOM    157  N   GLN A  41      25.159  27.059  19.891  1.00  0.00           N  
ATOM    158  CA  GLN A  41      24.735  27.182  21.270  1.00  0.00           C  
ATOM    159  C   GLN A  41      25.648  28.181  21.968  1.00  0.00           C  
ATOM    160  O   GLN A  41      26.868  28.258  21.856  1.00  0.00           O  
ATOM    161  N   ARG A  42      25.064  28.994  22.853  1.00  0.00           N  
ATOM    162  CA  ARG A  42      25.598  29.496  24.103  1.00  0.00           C  
ATOM    163  C   ARG A  42      24.608  29.088  25.184  1.00  0.00           C  
ATOM    164  O   ARG A  42      23.399  29.121  24.969  1.00  0.00           O  
ATOM    165  N   LEU A  43      25.127  28.609  26.317  1.00  0.00           N  
ATOM    166  CA  LEU A  43      24.191  28.384  27.401  1.00  0.00           C  
ATOM    167  C   LEU A  43      24.003  29.635  28.247  1.00  0.00           C  
ATOM    168  O   LEU A  43      24.952  30.352  28.559  1.00  0.00           O  
ATOM    169  N   ILE A  44      22.737  29.947  28.535  1.00  0.00           N  
ATOM    170  CA  ILE A  44      22.381  30.881  29.584  1.00  0.00           C  
ATOM    171  C   ILE A  44      22.119  30.227  30.934  1.00  0.00           C  
ATOM    172  O   ILE A  44      21.402  29.233  31.035  1.00  0.00           O  
ATOM    173  N   PHE A  45      22.586  30.839  32.023  1.00  0.00           N  
ATOM    174  CA  PHE A  45      22.023  30.742  33.354  1.00  0.00           C  
ATOM    175  C   PHE A  45      22.106  32.071  34.092  1.00  0.00           C  
ATOM    176  O   PHE A  45      23.111  32.767  33.964  1.00  0.00           O  
ATOM    177  N   ALA A  46      20.978  32.400  34.724  1.00  0.00           N  
ATOM    178  CA  ALA A  46      20.947  33.496  35.673  1.00  0.00           C  
ATOM    179  C   ALA A  46      21.442  34.797  35.059  1.00  0.00           C  
ATOM    180  O   ALA A  46      22.187  35.429  35.805  1.00  0.00           O  
ATOM    181  N   GLY A  47      21.117  35.132  33.808  1.00  0.00           N  
ATOM    182  CA  GLY A  47      21.489  36.290  33.023  1.00  0.00           C  
ATOM    183  C   GLY A  47      22.719  36.040  32.160  1.00  0.00           C  
ATOM    184  O   GLY A  47      23.064  36.973  31.439  1.00  0.00           O  
ATOM    185  N   LYS A  48      23.485  34.964  32.357  1.00  0.00           N  
ATOM    186  CA  LYS A  48      24.872  34.916  31.940  1.00  0.00           C  
ATOM    187  C   LYS A  48      25.265  33.861  30.916  1.00  0.00           C  
ATOM    188  O   LYS A  48      24.844  32.713  31.046  1.00  0.00           O  
ATOM    189  N   GLN A  49      25.920  34.307  29.842  1.00  0.00           N  
ATOM    190  CA  GLN A  49      26.402  33.394  28.825  1.00  0.00           C  
ATOM    191  C   GLN A  49      27.676  32.713  29.307  1.00  0.00           C  
ATOM    192  O   GLN A  49      28.635  33.336  29.756  1.00  0.00           O  
ATOM    193  N   LEU A  50      27.631  31.418  28.986  1.00  0.00           N  
ATOM    194  CA  LEU A  50      28.594  30.415  29.391  1.00  0.00           C  
ATOM    195  C   LEU A  50      29.575  30.006  28.301  1.00  0.00           C  
ATOM    196  O   LEU A  50      29.156  29.667  27.197  1.00  0.00           O  
ATOM    197  N   GLU A  51      30.827  29.856  28.740  1.00  0.00           N  
ATOM    198  CA  GLU A  51      32.023  29.912  27.925  1.00  0.00           C  
ATOM    199  C   GLU A  51      32.901  28.673  28.031  1.00  0.00           C  
ATOM    200  O   GLU A  51      33.101  28.220  29.156  1.00  0.00           O  
ATOM    201  N   ASP A  52      33.567  28.244  26.956  1.00  0.00           N  
ATOM    202  CA  ASP A  52      33.517  26.811  26.749  1.00  0.00           C  
ATOM    203  C   ASP A  52      34.644  26.025  27.405  1.00  0.00           C  
ATOM    204  O   ASP A  52      34.438  24.849  27.698  1.00  0.00           O  
ATOM    205  N   GLY A  53      35.731  26.562  27.963  1.00  0.00           N  
ATOM    206  CA  GLY A  53      36.884  25.946  28.588  1.00  0.00           C  
ATOM    207  C   GLY A  53      36.920  25.907  30.110  1.00  0.00           C  
ATOM    208  O   GLY A  53      37.922  25.742  30.801  1.00  0.00           O  
ATOM    209  N   ARG A  54      35.785  26.257  30.720  1.00  0.00           N  
ATOM    210  CA  ARG A  54      35.543  26.486  32.130  1.00  0.00           C  
ATOM    211  C   ARG A  54      34.470  25.571  32.701  1.00  0.00           C  
ATOM    212  O   ARG A  54      33.701  24.948  31.972  1.00  0.00           O  
ATOM    213  N   THR A  55      34.607  25.127  33.953  1.00  0.00           N  
ATOM    214  CA  THR A  55      33.896  24.038  34.593  1.00  0.00           C  
ATOM    215  C   THR A  55      32.568  24.569  35.115  1.00  0.00           C  
ATOM    216  O   THR A  55      32.395  25.769  35.313  1.00  0.00           O  
ATOM    217  N   LEU A  56      31.681  23.614  35.401  1.00  0.00           N  
ATOM    218  CA  LEU A  56      30.409  23.786  36.075  1.00  0.00           C  
ATOM    219  C   LEU A  56      30.572  24.456  37.432  1.00  0.00           C  
ATOM    220  O   LEU A  56      29.684  25.211  37.822  1.00  0.00           O  
ATOM    221  N   SER A  57      31.692  24.204  38.114  1.00  0.00           N  
ATOM    222  CA  SER A  57      31.955  24.963  39.320  1.00  0.00           C  
ATOM    223  C   SER A  57      32.253  26.430  39.045  1.00  0.00           C  
ATOM    224  O   SER A  57      32.000  27.265  39.911  1.00  0.00           O  
ATOM    225  N   ASP A  58      32.841  26.924  37.954  1.00  0.00           N  
ATOM    226  CA  ASP A  58      33.160  28.319  37.731  1.00  0.00           C  
ATOM    227  C   ASP A  58      31.925  29.202  37.839  1.00  0.00           C  
ATOM    228  O   ASP A  58      31.950  30.319  38.348  1.00  0.00           O  
ATOM    229  N   TYR A  59      30.830  28.644  37.318  1.00  0.00           N  
ATOM    230  CA  TYR A  59      29.628  29.445  37.194  1.00  0.00           C  
ATOM    231  C   TYR A  59      28.693  29.286  38.385  1.00  0.00           C  
ATOM    232  O   TYR A  59      27.607  29.862  38.398  1.00  0.00           O  
ATOM    233  N   ASN A  60      29.066  28.596  39.464  1.00  0.00           N  
ATOM    234  CA  ASN A  60      28.165  28.234  40.541  1.00  0.00           C  
ATOM    235  C   ASN A  60      26.987  27.407  40.047  1.00  0.00           C  
ATOM    236  O   ASN A  60      25.851  27.662  40.443  1.00  0.00           O  
ATOM    237  N   ILE A  61      27.190  26.359  39.246  1.00  0.00           N  
ATOM    238  CA  ILE A  61      26.131  25.487  38.779  1.00  0.00           C  
ATOM    239  C   ILE A  61      25.891  24.424  39.842  1.00  0.00           C  
ATOM    240  O   ILE A  61      26.782  23.656  40.201  1.00  0.00           O  
ATOM    241  N   GLN A  62      24.604  24.235  40.138  1.00  0.00           N  
ATOM    242  CA  GLN A  62      24.087  23.372  41.181  1.00  0.00           C  
ATOM    243  C   GLN A  62      23.182  22.325  40.546  1.00  0.00           C  
ATOM    244  O   GLN A  62      22.596  22.425  39.471  1.00  0.00           O  
ATOM    245  N   LYS A  63      23.201  21.206  41.273  1.00  0.00           N  
ATOM    246  CA  LYS A  63      22.113  20.252  41.207  1.00  0.00           C  
ATOM    247  C   LYS A  63      20.725  20.790  40.888  1.00  0.00           C  
ATOM    248  O   LYS A  63      20.139  21.593  41.611  1.00  0.00           O  
ATOM    249  N   GLU A  64      20.190  20.209  39.812  1.00  0.00           N  
ATOM    250  CA  GLU A  64      18.849  20.506  39.350  1.00  0.00           C  
ATOM    251  C   GLU A  64      18.625  21.911  38.807  1.00  0.00           C  
ATOM    252  O   GLU A  64      17.469  22.279  38.604  1.00  0.00           O  
ATOM    253  N   SER A  65      19.708  22.649  38.555  1.00  0.00           N  
ATOM    254  CA  SER A  65      19.598  23.941  37.909  1.00  0.00           C  
ATOM    255  C   SER A  65      19.271  23.807  36.428  1.00  0.00           C  
ATOM    256  O   SER A  65      19.751  22.900  35.751  1.00  0.00           O  
ATOM    257  N   THR A  66      18.665  24.798  35.769  1.00  0.00           N  
ATOM    258  CA  THR A  66      18.129  24.737  34.424  1.00  0.00           C  
ATOM    259  C   THR A  66      18.727  25.849  33.574  1.00  0.00           C  
ATOM    260  O   THR A  66      18.685  27.066  33.735  1.00  0.00           O  
ATOM    261  N   LEU A  67      19.406  25.304  32.563  1.00  0.00           N  
ATOM    262  CA  LEU A  67      20.158  26.042  31.569  1.00  0.00           C  
ATOM    263  C   LEU A  67      19.264  26.284  30.361  1.00  0.00           C  
ATOM    264  O   LEU A  67      18.359  25.488  30.121  1.00  0.00           O  
ATOM    265  N   HIS A  68      19.492  27.364  29.610  1.00  0.00           N  
ATOM    266  CA  HIS A  68      18.699  27.939  28.542  1.00  0.00           C  
ATOM    267  C   HIS A  68      19.603  28.048  27.323  1.00  0.00           C  
ATOM    268  O   HIS A  68      20.824  27.968  27.444  1.00  0.00           O  
ATOM    269  N   LEU A  69      19.023  28.599  26.254  1.00  0.00           N  
ATOM    270  CA  LEU A  69      19.706  28.408  24.992  1.00  0.00           C  
ATOM    271  C   LEU A  69      19.308  29.568  24.089  1.00  0.00           C  
ATOM    272  O   LEU A  69      18.178  29.511  23.609  1.00  0.00           O  
ATOM    273  N   VAL A  70      20.288  30.294  23.546  1.00  0.00           N  
ATOM    274  CA  VAL A  70      20.354  31.351  22.557  1.00  0.00           C  
ATOM    275  C   VAL A  70      21.125  30.742  21.395  1.00  0.00           C  
ATOM    276  O   VAL A  70      21.930  29.851  21.657  1.00  0.00           O  
TER
ENDMDL
MODEL      12
ATOM      1  N   GLN A   2      22.687  15.488  38.406  1.00  0.00           N  
ATOM      2  CA  GLN A   2      21.881  16.021  37.327  1.00  0.00           C  
ATOM      3  C   GLN A   2      21.796  17.532  37.168  1.00  0.00           C  
ATOM      4  O   GLN A   2      21.759  18.195  38.202  1.00  0.00           O  
ATOM      5  N   ILE A   3      21.816  18.075  35.949  1.00  0.00           N  
ATOM      6  CA  ILE A   3      21.483  19.420  35.524  1.00  0.00           C  
ATOM      7  C   ILE A   3      20.544  19.462  34.328  1.00  0.00           C  
ATOM      8  O   ILE A   3      20.522  18.525  33.533  1.00  0.00           O  
ATOM      9  N   PHE A   4      19.821  20.577  34.197  1.00  0.00           N  
ATOM     10  CA  PHE A   4      18.874  20.686  33.105  1.00  0.00           C  
ATOM     11  C   PHE A   4      19.214  21.677  32.001  1.00  0.00           C  
ATOM     12  O   PHE A   4      19.614  22.815  32.235  1.00  0.00           O  
ATOM     13  N   VAL A   5      18.821  21.372  30.762  1.00  0.00           N  
ATOM     14  CA  VAL A   5      18.751  22.295  29.647  1.00  0.00           C  
ATOM     15  C   VAL A   5      17.289  22.406  29.237  1.00  0.00           C  
ATOM     16  O   VAL A   5      16.583  21.472  28.862  1.00  0.00           O  
ATOM     17  N   LYS A   6      16.793  23.641  29.133  1.00  0.00           N  
ATOM     18  CA  LYS A   6      15.543  24.072  28.543  1.00  0.00           C  
ATOM     19  C   LYS A   6      15.791  24.759  27.207  1.00  0.00           C  
ATOM     20  O   LYS A   6      16.592  25.689  27.261  1.00  0.00           O  
ATOM     21  N   THR A   7      15.296  24.199  26.101  1.00  0.00           N  
ATOM     22  CA  THR A   7      15.589  24.707  24.776  1.00  0.00           C  
ATOM     23  C   THR A   7      14.653  25.778  24.235  1.00  0.00           C  
ATOM     24  O   THR A   7      13.697  26.078  24.948  1.00  0.00           O  
ATOM     25  N   LEU A   8      14.883  26.181  22.983  1.00  0.00           N  
ATOM     26  CA  LEU A   8      14.038  27.264  22.520  1.00  0.00           C  
ATOM     27  C   LEU A   8      12.613  26.909  22.121  1.00  0.00           C  
ATOM     28  O   LEU A   8      11.771  27.772  21.886  1.00  0.00           O  
ATOM     29  N   THR A   9      12.378  25.599  22.027  1.00  0.00           N  
ATOM     30  CA  THR A   9      11.162  24.934  21.607  1.00  0.00           C  
ATOM     31  C   THR A   9      10.284  24.319  22.688  1.00  0.00           C  
ATOM     32  O   THR A   9       9.293  23.727  22.266  1.00  0.00           O  
ATOM     33  N   GLY A  10      10.550  24.402  23.993  1.00  0.00           N  
ATOM     34  CA  GLY A  10       9.760  23.855  25.077  1.00  0.00           C  
ATOM     35  C   GLY A  10      10.052  22.457  25.605  1.00  0.00           C  
ATOM     36  O   GLY A  10       9.279  22.069  26.479  1.00  0.00           O  
ATOM     37  N   LYS A  11      11.116  21.808  25.128  1.00  0.00           N  
ATOM     38  CA  LYS A  11      11.642  20.546  25.608  1.00  0.00           C  
ATOM     39  C   LYS A  11      12.627  20.827  26.734  1.00  0.00           C  
ATOM     40  O   LYS A  11      13.422  21.755  26.605  1.00  0.00           O  
ATOM     41  N   THR A  12      12.510  20.133  27.869  1.00  0.00           N  
ATOM     42  CA  THR A  12      13.351  20.101  29.048  1.00  0.00           C  
ATOM     43  C   THR A  12      14.138  18.801  29.121  1.00  0.00           C  
ATOM     44  O   THR A  12      13.511  17.782  28.838  1.00  0.00           O  
ATOM     45  N   ILE A  13      15.448  18.829  29.379  1.00  0.00           N  
ATOM     46  CA  ILE A  13      16.402  17.769  29.122  1.00  0.00           C  
ATOM     47  C   ILE A  13      17.340  17.541  30.298  1.00  0.00           C  
ATOM     48  O   ILE A  13      18.214  18.366  30.555  1.00  0.00           O  
ATOM     49  N   THR A  14      17.290  16.319  30.834  1.00  0.00           N  
ATOM     50  CA  THR A  14      18.137  15.821  31.899  1.00  0.00           C  
ATOM     51  C   THR A  14      19.417  15.417  31.183  1.00  0.00           C  
ATOM     52  O   THR A  14      19.504  14.382  30.528  1.00  0.00           O  
ATOM     53  N   LEU A  15      20.387  16.249  31.570  1.00  0.00           N  
ATOM     54  CA  LEU A  15      21.772  15.847  31.428  1.00  0.00           C  
ATOM     55  C   LEU A  15      22.192  15.275  32.775  1.00  0.00           C  
ATOM     56  O   LEU A  15      21.658  15.589  33.837  1.00  0.00           O  
ATOM     57  N   GLU A  16      23.113  14.315  32.666  1.00  0.00           N  
ATOM     58  CA  GLU A  16      23.916  13.885  33.793  1.00  0.00           C  
ATOM     59  C   GLU A  16      25.334  14.404  33.612  1.00  0.00           C  
ATOM     60  O   GLU A  16      25.966  14.306  32.562  1.00  0.00           O  
ATOM     61  N   VAL A  17      25.689  15.225  34.603  1.00  0.00           N  
ATOM     62  CA  VAL A  17      26.972  15.893  34.510  1.00  0.00           C  
ATOM     63  C   VAL A  17      27.704  15.875  35.845  1.00  0.00           C  
ATOM     64  O   VAL A  17      27.107  15.671  36.899  1.00  0.00           O  
ATOM     65  N   GLU A  18      28.990  16.172  35.640  1.00  0.00           N  
ATOM     66  CA  GLU A  18      29.893  16.098  36.770  1.00  0.00           C  
ATOM     67  C   GLU A  18      29.966  17.512  37.327  1.00  0.00           C  
ATOM     68  O   GLU A  18      29.478  18.393  36.620  1.00  0.00           O  
ATOM     69  N   PRO A  19      30.463  17.712  38.549  1.00  0.00           N  
ATOM     70  CA  PRO A  19      31.045  18.961  38.997  1.00  0.00           C  
ATOM     71  C   PRO A  19      32.377  19.305  38.344  1.00  0.00           C  
ATOM     72  O   PRO A  19      32.558  20.469  37.994  1.00  0.00           O  
ATOM     73  N   SER A  20      33.193  18.309  37.994  1.00  0.00           N  
ATOM     74  CA  SER A  20      34.398  18.387  37.192  1.00  0.00           C  
ATOM     75  C   SER A  20      34.278  18.747  35.718  1.00  0.00           C  
ATOM     76  O   SER A  20      35.289  19.092  35.110  1.00  0.00           O  
ATOM     77  N   ASP A  21      33.162  18.433  35.056  1.00  0.00           N  
ATOM     78  CA  ASP A  21      32.806  18.769  33.692  1.00  0.00           C  
ATOM     79  C   ASP A  21      32.961  20.251  33.385  1.00  0.00           C  
ATOM     80  O   ASP A  21      32.532  21.133  34.125  1.00  0.00           O  
ATOM     81  N   THR A  22      33.495  20.411  32.170  1.00  0.00           N  
ATOM     82  CA  THR A  22      33.453  21.751  31.620  1.00  0.00           C  
ATOM     83  C   THR A  22      32.227  21.969  30.746  1.00  0.00           C  
ATOM     84  O   THR A  22      31.537  20.995  30.450  1.00  0.00           O  
ATOM     85  N   ILE A  23      31.925  23.232  30.438  1.00  0.00           N  
ATOM     86  CA  ILE A  23      30.778  23.567  29.616  1.00  0.00           C  
ATOM     87  C   ILE A  23      30.898  23.115  28.169  1.00  0.00           C  
ATOM     88  O   ILE A  23      29.866  22.761  27.602  1.00  0.00           O  
ATOM     89  N   GLU A  24      32.085  22.884  27.602  1.00  0.00           N  
ATOM     90  CA  GLU A  24      32.146  22.255  26.299  1.00  0.00           C  
ATOM     91  C   GLU A  24      31.672  20.811  26.390  1.00  0.00           C  
ATOM     92  O   GLU A  24      30.933  20.309  25.545  1.00  0.00           O  
ATOM     93  N   ASN A  25      31.983  20.132  27.498  1.00  0.00           N  
ATOM     94  CA  ASN A  25      31.409  18.819  27.711  1.00  0.00           C  
ATOM     95  C   ASN A  25      29.922  18.814  28.037  1.00  0.00           C  
ATOM     96  O   ASN A  25      29.283  17.784  27.830  1.00  0.00           O  
ATOM     97  N   VAL A  26      29.302  19.863  28.584  1.00  0.00           N  
ATOM     98  CA  VAL A  26      27.874  20.069  28.722  1.00  0.00           C  
ATOM     99  C   VAL A  26      27.219  20.304  27.369  1.00  0.00           C  
ATOM    100  O   VAL A  26      26.445  19.465  26.913  1.00  0.00           O  
ATOM    101  N   LYS A  27      27.831  21.079  26.471  1.00  0.00           N  
ATOM    102  CA  LYS A  27      27.556  21.297  25.065  1.00  0.00           C  
ATOM    103  C   LYS A  27      27.730  20.016  24.263  1.00  0.00           C  
ATOM    104  O   LYS A  27      26.816  19.740  23.488  1.00  0.00           O  
ATOM    105  N   ALA A  28      28.785  19.209  24.399  1.00  0.00           N  
ATOM    106  CA  ALA A  28      28.823  17.961  23.665  1.00  0.00           C  
ATOM    107  C   ALA A  28      27.826  16.898  24.104  1.00  0.00           C  
ATOM    108  O   ALA A  28      27.502  16.031  23.296  1.00  0.00           O  
ATOM    109  N   LYS A  29      27.432  16.939  25.379  1.00  0.00           N  
ATOM    110  CA  LYS A  29      26.402  16.032  25.843  1.00  0.00           C  
ATOM    111  C   LYS A  29      24.979  16.479  25.546  1.00  0.00           C  
ATOM    112  O   LYS A  29      24.107  15.647  25.305  1.00  0.00           O  
ATOM    113  N   ILE A  30      24.744  17.793  25.491  1.00  0.00           N  
ATOM    114  CA  ILE A  30      23.592  18.283  24.761  1.00  0.00           C  
ATOM    115  C   ILE A  30      23.495  17.636  23.387  1.00  0.00           C  
ATOM    116  O   ILE A  30      22.422  17.131  23.063  1.00  0.00           O  
ATOM    117  N   GLN A  31      24.560  17.683  22.582  1.00  0.00           N  
ATOM    118  CA  GLN A  31      24.590  17.296  21.187  1.00  0.00           C  
ATOM    119  C   GLN A  31      24.024  15.887  21.083  1.00  0.00           C  
ATOM    120  O   GLN A  31      23.476  15.590  20.024  1.00  0.00           O  
ATOM    121  N   ASP A  32      24.300  14.947  21.990  1.00  0.00           N  
ATOM    122  CA  ASP A  32      23.908  13.554  22.052  1.00  0.00           C  
ATOM    123  C   ASP A  32      22.389  13.461  22.046  1.00  0.00           C  
ATOM    124  O   ASP A  32      21.816  12.672  21.297  1.00  0.00           O  
ATOM    125  N   LYS A  33      21.723  14.270  22.873  1.00  0.00           N  
ATOM    126  CA  LYS A  33      20.296  14.217  23.117  1.00  0.00           C  
ATOM    127  C   LYS A  33      19.474  14.735  21.945  1.00  0.00           C  
ATOM    128  O   LYS A  33      18.361  14.272  21.703  1.00  0.00           O  
ATOM    129  N   GLU A  34      19.978  15.750  21.240  1.00  0.00           N  
ATOM    130  CA  GLU A  34      19.298  16.640  20.320  1.00  0.00           C  
ATOM    131  C   GLU A  34      19.874  16.665  18.911  1.00  0.00           C  
ATOM    132  O   GLU A  34      19.202  16.749  17.885  1.00  0.00           O  
ATOM    133  N   GLY A  35      21.208  16.691  18.900  1.00  0.00           N  
ATOM    134  CA  GLY A  35      22.040  16.613  17.715  1.00  0.00           C  
ATOM    135  C   GLY A  35      22.490  17.977  17.214  1.00  0.00           C  
ATOM    136  O   GLY A  35      22.899  18.051  16.057  1.00  0.00           O  
ATOM    137  N   ILE A  36      22.419  19.043  18.014  1.00  0.00           N  
ATOM    138  CA  ILE A  36      22.775  20.405  17.673  1.00  0.00           C  
ATOM    139  C   ILE A  36      24.250  20.610  17.985  1.00  0.00           C  
ATOM    140  O   ILE A  36      24.636  20.519  19.149  1.00  0.00           O  
ATOM    141  N   PRO A  37      25.110  20.911  17.009  1.00  0.00           N  
ATOM    142  CA  PRO A  37      26.541  20.904  17.238  1.00  0.00           C  
ATOM    143  C   PRO A  37      27.039  22.146  17.964  1.00  0.00           C  
ATOM    144  O   PRO A  37      26.398  23.194  17.939  1.00  0.00           O  
ATOM    145  N   PRO A  38      28.208  22.056  18.603  1.00  0.00           N  
ATOM    146  CA  PRO A  38      28.761  23.128  19.405  1.00  0.00           C  
ATOM    147  C   PRO A  38      28.914  24.484  18.731  1.00  0.00           C  
ATOM    148  O   PRO A  38      28.863  25.443  19.497  1.00  0.00           O  
ATOM    149  N   ASP A  39      29.025  24.699  17.418  1.00  0.00           N  
ATOM    150  CA  ASP A  39      28.696  25.834  16.578  1.00  0.00           C  
ATOM    151  C   ASP A  39      27.454  26.567  17.066  1.00  0.00           C  
ATOM    152  O   ASP A  39      27.522  27.722  17.481  1.00  0.00           O  
ATOM    153  N   GLN A  40      26.314  25.873  17.066  1.00  0.00           N  
ATOM    154  CA  GLN A  40      24.972  26.420  17.039  1.00  0.00           C  
ATOM    155  C   GLN A  40      24.544  26.775  18.456  1.00  0.00           C  
ATOM    156  O   GLN A  40      23.457  27.319  18.632  1.00  0.00           O  
ATOM    157  N   GLN A  41      25.384  26.553  19.470  1.00  0.00           N  
ATOM    158  CA  GLN A  41      25.086  26.499  20.888  1.00  0.00           C  
ATOM    159  C   GLN A  41      25.635  27.756  21.547  1.00  0.00           C  
ATOM    160  O   GLN A  41      26.821  28.076  21.569  1.00  0.00           O  
ATOM    161  N   ARG A  42      24.675  28.509  22.090  1.00  0.00           N  
ATOM    162  CA  ARG A  42      24.990  29.544  23.054  1.00  0.00           C  
ATOM    163  C   ARG A  42      24.372  29.179  24.396  1.00  0.00           C  
ATOM    164  O   ARG A  42      23.186  28.856  24.411  1.00  0.00           O  
ATOM    165  N   LEU A  43      25.059  29.425  25.514  1.00  0.00           N  
ATOM    166  CA  LEU A  43      24.616  28.860  26.773  1.00  0.00           C  
ATOM    167  C   LEU A  43      24.339  29.947  27.800  1.00  0.00           C  
ATOM    168  O   LEU A  43      25.222  30.747  28.104  1.00  0.00           O  
ATOM    169  N   ILE A  44      23.199  29.919  28.494  1.00  0.00           N  
ATOM    170  CA  ILE A  44      22.717  30.917  29.428  1.00  0.00           C  
ATOM    171  C   ILE A  44      22.244  30.403  30.781  1.00  0.00           C  
ATOM    172  O   ILE A  44      21.373  29.546  30.910  1.00  0.00           O  
ATOM    173  N   PHE A  45      22.877  30.895  31.849  1.00  0.00           N  
ATOM    174  CA  PHE A  45      22.594  30.759  33.263  1.00  0.00           C  
ATOM    175  C   PHE A  45      22.762  32.039  34.070  1.00  0.00           C  
ATOM    176  O   PHE A  45      23.762  32.742  33.942  1.00  0.00           O  
ATOM    177  N   ALA A  46      21.820  32.283  34.983  1.00  0.00           N  
ATOM    178  CA  ALA A  46      21.700  33.525  35.719  1.00  0.00           C  
ATOM    179  C   ALA A  46      21.954  34.736  34.833  1.00  0.00           C  
ATOM    180  O   ALA A  46      22.611  35.682  35.261  1.00  0.00           O  
ATOM    181  N   GLY A  47      21.542  34.642  33.566  1.00  0.00           N  
ATOM    182  CA  GLY A  47      21.769  35.708  32.612  1.00  0.00           C  
ATOM    183  C   GLY A  47      23.225  35.970  32.251  1.00  0.00           C  
ATOM    184  O   GLY A  47      23.556  37.084  31.851  1.00  0.00           O  
ATOM    185  N   LYS A  48      24.125  34.996  32.401  1.00  0.00           N  
ATOM    186  CA  LYS A  48      25.484  34.898  31.906  1.00  0.00           C  
ATOM    187  C   LYS A  48      25.731  33.862  30.819  1.00  0.00           C  
ATOM    188  O   LYS A  48      25.469  32.686  31.061  1.00  0.00           O  
ATOM    189  N   GLN A  49      26.318  34.303  29.703  1.00  0.00           N  
ATOM    190  CA  GLN A  49      26.889  33.362  28.761  1.00  0.00           C  
ATOM    191  C   GLN A  49      28.094  32.608  29.304  1.00  0.00           C  
ATOM    192  O   GLN A  49      29.021  33.231  29.817  1.00  0.00           O  
ATOM    193  N   LEU A  50      28.097  31.275  29.225  1.00  0.00           N  
ATOM    194  CA  LEU A  50      29.093  30.347  29.719  1.00  0.00           C  
ATOM    195  C   LEU A  50      30.307  30.266  28.806  1.00  0.00           C  
ATOM    196  O   LEU A  50      30.251  29.364  27.972  1.00  0.00           O  
ATOM    197  N   GLU A  51      31.300  31.112  29.090  1.00  0.00           N  
ATOM    198  CA  GLU A  51      32.598  31.157  28.448  1.00  0.00           C  
ATOM    199  C   GLU A  51      33.063  29.709  28.375  1.00  0.00           C  
ATOM    200  O   GLU A  51      33.205  29.046  29.399  1.00  0.00           O  
ATOM    201  N   ASP A  52      33.278  29.225  27.149  1.00  0.00           N  
ATOM    202  CA  ASP A  52      33.136  27.802  26.914  1.00  0.00           C  
ATOM    203  C   ASP A  52      34.117  26.777  27.464  1.00  0.00           C  
ATOM    204  O   ASP A  52      33.765  25.606  27.341  1.00  0.00           O  
ATOM    205  N   GLY A  53      35.282  27.128  28.013  1.00  0.00           N  
ATOM    206  CA  GLY A  53      36.172  26.215  28.701  1.00  0.00           C  
ATOM    207  C   GLY A  53      36.127  26.103  30.219  1.00  0.00           C  
ATOM    208  O   GLY A  53      37.098  25.750  30.885  1.00  0.00           O  
ATOM    209  N   ARG A  54      35.021  26.514  30.844  1.00  0.00           N  
ATOM    210  CA  ARG A  54      34.782  26.560  32.272  1.00  0.00           C  
ATOM    211  C   ARG A  54      33.798  25.543  32.832  1.00  0.00           C  
ATOM    212  O   ARG A  54      32.844  25.079  32.210  1.00  0.00           O  
ATOM    213  N   THR A  55      34.021  25.186  34.099  1.00  0.00           N  
ATOM    214  CA  THR A  55      33.177  24.292  34.865  1.00  0.00           C  
ATOM    215  C   THR A  55      31.885  24.805  35.483  1.00  0.00           C  
ATOM    216  O   THR A  55      31.670  25.953  35.867  1.00  0.00           O  
ATOM    217  N   LEU A  56      30.986  23.866  35.788  1.00  0.00           N  
ATOM    218  CA  LEU A  56      29.743  24.146  36.477  1.00  0.00           C  
ATOM    219  C   LEU A  56      30.013  24.867  37.790  1.00  0.00           C  
ATOM    220  O   LEU A  56      29.288  25.793  38.144  1.00  0.00           O  
ATOM    221  N   SER A  57      31.124  24.555  38.462  1.00  0.00           N  
ATOM    222  CA  SER A  57      31.737  25.065  39.672  1.00  0.00           C  
ATOM    223  C   SER A  57      32.314  26.452  39.430  1.00  0.00           C  
ATOM    224  O   SER A  57      32.051  27.303  40.277  1.00  0.00           O  
ATOM    225  N   ASP A  58      32.905  26.896  38.318  1.00  0.00           N  
ATOM    226  CA  ASP A  58      33.119  28.306  38.067  1.00  0.00           C  
ATOM    227  C   ASP A  58      31.832  29.113  38.142  1.00  0.00           C  
ATOM    228  O   ASP A  58      31.811  30.126  38.838  1.00  0.00           O  
ATOM    229  N   TYR A  59      30.714  28.531  37.700  1.00  0.00           N  
ATOM    230  CA  TYR A  59      29.424  29.188  37.664  1.00  0.00           C  
ATOM    231  C   TYR A  59      28.511  28.934  38.855  1.00  0.00           C  
ATOM    232  O   TYR A  59      27.366  29.382  38.864  1.00  0.00           O  
ATOM    233  N   ASN A  60      28.955  28.188  39.869  1.00  0.00           N  
ATOM    234  CA  ASN A  60      28.219  27.848  41.069  1.00  0.00           C  
ATOM    235  C   ASN A  60      26.866  27.206  40.798  1.00  0.00           C  
ATOM    236  O   ASN A  60      25.885  27.207  41.538  1.00  0.00           O  
ATOM    237  N   ILE A  61      26.836  26.423  39.716  1.00  0.00           N  
ATOM    238  CA  ILE A  61      25.685  25.843  39.055  1.00  0.00           C  
ATOM    239  C   ILE A  61      25.611  24.636  39.979  1.00  0.00           C  
ATOM    240  O   ILE A  61      26.480  23.767  39.966  1.00  0.00           O  
ATOM    241  N   GLN A  62      24.441  24.357  40.560  1.00  0.00           N  
ATOM    242  CA  GLN A  62      24.226  23.340  41.571  1.00  0.00           C  
ATOM    243  C   GLN A  62      23.364  22.231  40.985  1.00  0.00           C  
ATOM    244  O   GLN A  62      22.916  22.404  39.854  1.00  0.00           O  
ATOM    245  N   LYS A  63      23.320  21.099  41.692  1.00  0.00           N  
ATOM    246  CA  LYS A  63      22.312  20.160  41.242  1.00  0.00           C  
ATOM    247  C   LYS A  63      20.928  20.737  40.980  1.00  0.00           C  
ATOM    248  O   LYS A  63      20.408  21.640  41.631  1.00  0.00           O  
ATOM    249  N   GLU A  64      20.301  20.034  40.035  1.00  0.00           N  
ATOM    250  CA  GLU A  64      19.041  20.406  39.423  1.00  0.00           C  
ATOM    251  C   GLU A  64      18.895  21.838  38.929  1.00  0.00           C  
ATOM    252  O   GLU A  64      17.902  22.552  39.052  1.00  0.00           O  
ATOM    253  N   SER A  65      19.932  22.384  38.291  1.00  0.00           N  
ATOM    254  CA  SER A  65      19.922  23.730  37.753  1.00  0.00           C  
ATOM    255  C   SER A  65      19.437  23.756  36.311  1.00  0.00           C  
ATOM    256  O   SER A  65      19.821  22.868  35.553  1.00  0.00           O  
ATOM    257  N   THR A  66      19.129  24.932  35.758  1.00  0.00           N  
ATOM    258  CA  THR A  66      18.309  24.968  34.565  1.00  0.00           C  
ATOM    259  C   THR A  66      18.946  26.072  33.732  1.00  0.00           C  
ATOM    260  O   THR A  66      18.954  27.259  34.052  1.00  0.00           O  
ATOM    261  N   LEU A  67      19.498  25.591  32.616  1.00  0.00           N  
ATOM    262  CA  LEU A  67      20.393  26.285  31.712  1.00  0.00           C  
ATOM    263  C   LEU A  67      19.611  26.515  30.426  1.00  0.00           C  
ATOM    264  O   LEU A  67      18.991  25.591  29.906  1.00  0.00           O  
ATOM    265  N   HIS A  68      19.588  27.719  29.849  1.00  0.00           N  
ATOM    266  CA  HIS A  68      18.729  28.194  28.784  1.00  0.00           C  
ATOM    267  C   HIS A  68      19.559  28.087  27.512  1.00  0.00           C  
ATOM    268  O   HIS A  68      20.528  28.843  27.492  1.00  0.00           O  
ATOM    269  N   LEU A  69      19.282  27.241  26.517  1.00  0.00           N  
ATOM    270  CA  LEU A  69      20.044  27.196  25.286  1.00  0.00           C  
ATOM    271  C   LEU A  69      19.458  28.125  24.231  1.00  0.00           C  
ATOM    272  O   LEU A  69      18.242  28.106  24.055  1.00  0.00           O  
ATOM    273  N   VAL A  70      20.283  28.998  23.647  1.00  0.00           N  
ATOM    274  CA  VAL A  70      19.868  29.721  22.462  1.00  0.00           C  
ATOM    275  C   VAL A  70      20.503  29.175  21.191  1.00  0.00           C  
ATOM    276  O   VAL A  70      21.720  29.020  21.121  1.00  0.00           O  
TER
ENDMDL
MODEL      13
ATOM      1  N   GLN A   2      22.451  15.810  38.228  1.00  0.00           N  
ATOM      2  CA  GLN A   2      21.621  16.230  37.117  1.00  0.00           C  
ATOM      3  C   GLN A   2      21.573  17.749  37.043  1.00  0.00           C  
ATOM      4  O   GLN A   2      21.506  18.409  38.077  1.00  0.00           O  
ATOM      5  N   ILE A   3      21.747  18.296  35.836  1.00  0.00           N  
ATOM      6  CA  ILE A   3      21.317  19.556  35.267  1.00  0.00           C  
ATOM      7  C   ILE A   3      20.178  19.371  34.275  1.00  0.00           C  
ATOM      8  O   ILE A   3      20.033  18.366  33.582  1.00  0.00           O  
ATOM      9  N   PHE A   4      19.537  20.516  34.031  1.00  0.00           N  
ATOM     10  CA  PHE A   4      18.491  20.600  33.032  1.00  0.00           C  
ATOM     11  C   PHE A   4      18.776  21.719  32.041  1.00  0.00           C  
ATOM     12  O   PHE A   4      19.161  22.818  32.437  1.00  0.00           O  
ATOM     13  N   VAL A   5      18.474  21.606  30.746  1.00  0.00           N  
ATOM     14  CA  VAL A   5      18.501  22.632  29.724  1.00  0.00           C  
ATOM     15  C   VAL A   5      17.190  22.714  28.955  1.00  0.00           C  
ATOM     16  O   VAL A   5      16.613  21.726  28.506  1.00  0.00           O  
ATOM     17  N   LYS A   6      16.606  23.913  28.890  1.00  0.00           N  
ATOM     18  CA  LYS A   6      15.316  24.325  28.374  1.00  0.00           C  
ATOM     19  C   LYS A   6      15.481  25.081  27.064  1.00  0.00           C  
ATOM     20  O   LYS A   6      16.160  26.106  27.030  1.00  0.00           O  
ATOM     21  N   THR A   7      14.652  24.702  26.090  1.00  0.00           N  
ATOM     22  CA  THR A   7      14.608  25.399  24.820  1.00  0.00           C  
ATOM     23  C   THR A   7      13.324  26.214  24.791  1.00  0.00           C  
ATOM     24  O   THR A   7      12.415  25.927  25.567  1.00  0.00           O  
ATOM     25  N   LEU A   8      13.316  27.366  24.115  1.00  0.00           N  
ATOM     26  CA  LEU A   8      12.148  27.992  23.530  1.00  0.00           C  
ATOM     27  C   LEU A   8      11.168  27.023  22.884  1.00  0.00           C  
ATOM     28  O   LEU A   8       9.968  27.261  23.004  1.00  0.00           O  
ATOM     29  N   THR A   9      11.587  26.039  22.085  1.00  0.00           N  
ATOM     30  CA  THR A   9      10.844  25.194  21.172  1.00  0.00           C  
ATOM     31  C   THR A   9       9.876  24.175  21.753  1.00  0.00           C  
ATOM     32  O   THR A   9       9.284  23.474  20.935  1.00  0.00           O  
ATOM     33  N   GLY A  10       9.817  23.962  23.071  1.00  0.00           N  
ATOM     34  CA  GLY A  10       8.927  23.001  23.690  1.00  0.00           C  
ATOM     35  C   GLY A  10       9.619  22.214  24.794  1.00  0.00           C  
ATOM     36  O   GLY A  10       8.852  21.621  25.549  1.00  0.00           O  
ATOM     37  N   LYS A  11      10.945  22.139  24.928  1.00  0.00           N  
ATOM     38  CA  LYS A  11      11.537  21.038  25.661  1.00  0.00           C  
ATOM     39  C   LYS A  11      12.182  21.323  27.010  1.00  0.00           C  
ATOM     40  O   LYS A  11      12.536  22.443  27.370  1.00  0.00           O  
ATOM     41  N   THR A  12      12.491  20.247  27.737  1.00  0.00           N  
ATOM     42  CA  THR A  12      13.499  20.042  28.757  1.00  0.00           C  
ATOM     43  C   THR A  12      14.438  18.883  28.457  1.00  0.00           C  
ATOM     44  O   THR A  12      13.960  17.845  28.004  1.00  0.00           O  
ATOM     45  N   ILE A  13      15.734  19.125  28.673  1.00  0.00           N  
ATOM     46  CA  ILE A  13      16.773  18.181  28.313  1.00  0.00           C  
ATOM     47  C   ILE A  13      17.468  17.733  29.591  1.00  0.00           C  
ATOM     48  O   ILE A  13      18.175  18.560  30.162  1.00  0.00           O  
ATOM     49  N   THR A  14      17.267  16.484  30.015  1.00  0.00           N  
ATOM     50  CA  THR A  14      17.985  15.986  31.171  1.00  0.00           C  
ATOM     51  C   THR A  14      19.311  15.348  30.780  1.00  0.00           C  
ATOM     52  O   THR A  14      19.330  14.644  29.773  1.00  0.00           O  
ATOM     53  N   LEU A  15      20.276  15.749  31.611  1.00  0.00           N  
ATOM     54  CA  LEU A  15      21.692  15.711  31.303  1.00  0.00           C  
ATOM     55  C   LEU A  15      22.456  15.375  32.576  1.00  0.00           C  
ATOM     56  O   LEU A  15      22.241  15.923  33.654  1.00  0.00           O  
ATOM     57  N   GLU A  16      23.353  14.399  32.405  1.00  0.00           N  
ATOM     58  CA  GLU A  16      24.139  13.820  33.476  1.00  0.00           C  
ATOM     59  C   GLU A  16      25.553  14.386  33.465  1.00  0.00           C  
ATOM     60  O   GLU A  16      26.196  14.267  32.424  1.00  0.00           O  
ATOM     61  N   VAL A  17      25.953  15.053  34.549  1.00  0.00           N  
ATOM     62  CA  VAL A  17      27.171  15.771  34.869  1.00  0.00           C  
ATOM     63  C   VAL A  17      27.795  15.502  36.231  1.00  0.00           C  
ATOM     64  O   VAL A  17      27.101  15.059  37.142  1.00  0.00           O  
ATOM     65  N   GLU A  18      29.085  15.780  36.441  1.00  0.00           N  
ATOM     66  CA  GLU A  18      29.594  16.085  37.762  1.00  0.00           C  
ATOM     67  C   GLU A  18      30.258  17.450  37.882  1.00  0.00           C  
ATOM     68  O   GLU A  18      30.355  18.073  36.827  1.00  0.00           O  
ATOM     69  N   PRO A  19      30.479  18.016  39.070  1.00  0.00           N  
ATOM     70  CA  PRO A  19      30.944  19.381  39.205  1.00  0.00           C  
ATOM     71  C   PRO A  19      32.188  19.813  38.443  1.00  0.00           C  
ATOM     72  O   PRO A  19      32.220  21.034  38.310  1.00  0.00           O  
ATOM     73  N   SER A  20      33.182  18.989  38.099  1.00  0.00           N  
ATOM     74  CA  SER A  20      34.389  19.380  37.401  1.00  0.00           C  
ATOM     75  C   SER A  20      34.215  19.478  35.891  1.00  0.00           C  
ATOM     76  O   SER A  20      35.162  19.754  35.159  1.00  0.00           O  
ATOM     77  N   ASP A  21      33.110  19.015  35.305  1.00  0.00           N  
ATOM     78  CA  ASP A  21      32.883  19.115  33.877  1.00  0.00           C  
ATOM     79  C   ASP A  21      32.874  20.531  33.319  1.00  0.00           C  
ATOM     80  O   ASP A  21      32.234  21.456  33.815  1.00  0.00           O  
ATOM     81  N   THR A  22      33.561  20.707  32.189  1.00  0.00           N  
ATOM     82  CA  THR A  22      33.606  21.905  31.375  1.00  0.00           C  
ATOM     83  C   THR A  22      32.318  22.192  30.618  1.00  0.00           C  
ATOM     84  O   THR A  22      31.611  21.214  30.384  1.00  0.00           O  
ATOM     85  N   ILE A  23      31.936  23.429  30.288  1.00  0.00           N  
ATOM     86  CA  ILE A  23      30.747  23.666  29.493  1.00  0.00           C  
ATOM     87  C   ILE A  23      30.790  23.042  28.106  1.00  0.00           C  
ATOM     88  O   ILE A  23      29.749  22.500  27.744  1.00  0.00           O  
ATOM     89  N   GLU A  24      32.005  22.855  27.584  1.00  0.00           N  
ATOM     90  CA  GLU A  24      32.160  22.149  26.328  1.00  0.00           C  
ATOM     91  C   GLU A  24      31.783  20.678  26.413  1.00  0.00           C  
ATOM     92  O   GLU A  24      31.102  20.157  25.532  1.00  0.00           O  
ATOM     93  N   ASN A  25      32.056  20.010  27.538  1.00  0.00           N  
ATOM     94  CA  ASN A  25      31.688  18.648  27.867  1.00  0.00           C  
ATOM     95  C   ASN A  25      30.173  18.681  28.001  1.00  0.00           C  
ATOM     96  O   ASN A  25      29.541  17.740  27.526  1.00  0.00           O  
ATOM     97  N   VAL A  26      29.496  19.685  28.563  1.00  0.00           N  
ATOM     98  CA  VAL A  26      28.056  19.781  28.443  1.00  0.00           C  
ATOM     99  C   VAL A  26      27.523  20.013  27.036  1.00  0.00           C  
ATOM    100  O   VAL A  26      26.527  19.387  26.684  1.00  0.00           O  
ATOM    101  N   LYS A  27      28.090  20.833  26.148  1.00  0.00           N  
ATOM    102  CA  LYS A  27      27.565  21.006  24.808  1.00  0.00           C  
ATOM    103  C   LYS A  27      27.748  19.720  24.015  1.00  0.00           C  
ATOM    104  O   LYS A  27      26.915  19.511  23.137  1.00  0.00           O  
ATOM    105  N   ALA A  28      28.781  18.924  24.297  1.00  0.00           N  
ATOM    106  CA  ALA A  28      28.845  17.632  23.643  1.00  0.00           C  
ATOM    107  C   ALA A  28      27.769  16.721  24.217  1.00  0.00           C  
ATOM    108  O   ALA A  28      27.335  15.901  23.411  1.00  0.00           O  
ATOM    109  N   LYS A  29      27.371  16.731  25.491  1.00  0.00           N  
ATOM    110  CA  LYS A  29      26.257  15.983  26.039  1.00  0.00           C  
ATOM    111  C   LYS A  29      24.906  16.418  25.491  1.00  0.00           C  
ATOM    112  O   LYS A  29      24.094  15.583  25.095  1.00  0.00           O  
ATOM    113  N   ILE A  30      24.645  17.727  25.470  1.00  0.00           N  
ATOM    114  CA  ILE A  30      23.557  18.222  24.650  1.00  0.00           C  
ATOM    115  C   ILE A  30      23.611  17.605  23.260  1.00  0.00           C  
ATOM    116  O   ILE A  30      22.566  17.097  22.857  1.00  0.00           O  
ATOM    117  N   GLN A  31      24.719  17.627  22.515  1.00  0.00           N  
ATOM    118  CA  GLN A  31      24.844  17.113  21.167  1.00  0.00           C  
ATOM    119  C   GLN A  31      24.514  15.627  21.197  1.00  0.00           C  
ATOM    120  O   GLN A  31      23.867  15.191  20.247  1.00  0.00           O  
ATOM    121  N   ASP A  32      24.947  14.815  22.164  1.00  0.00           N  
ATOM    122  CA  ASP A  32      24.473  13.452  22.294  1.00  0.00           C  
ATOM    123  C   ASP A  32      22.962  13.385  22.461  1.00  0.00           C  
ATOM    124  O   ASP A  32      22.391  12.481  21.856  1.00  0.00           O  
ATOM    125  N   LYS A  33      22.235  14.276  23.142  1.00  0.00           N  
ATOM    126  CA  LYS A  33      20.794  14.142  23.217  1.00  0.00           C  
ATOM    127  C   LYS A  33      19.929  14.856  22.188  1.00  0.00           C  
ATOM    128  O   LYS A  33      18.837  14.421  21.831  1.00  0.00           O  
ATOM    129  N   GLU A  34      20.457  15.839  21.456  1.00  0.00           N  
ATOM    130  CA  GLU A  34      19.794  16.630  20.439  1.00  0.00           C  
ATOM    131  C   GLU A  34      20.377  16.804  19.043  1.00  0.00           C  
ATOM    132  O   GLU A  34      19.592  17.108  18.147  1.00  0.00           O  
ATOM    133  N   GLY A  35      21.696  16.613  18.974  1.00  0.00           N  
ATOM    134  CA  GLY A  35      22.402  16.550  17.711  1.00  0.00           C  
ATOM    135  C   GLY A  35      22.637  17.912  17.073  1.00  0.00           C  
ATOM    136  O   GLY A  35      22.921  18.077  15.888  1.00  0.00           O  
ATOM    137  N   ILE A  36      22.711  18.896  17.972  1.00  0.00           N  
ATOM    138  CA  ILE A  36      23.011  20.299  17.765  1.00  0.00           C  
ATOM    139  C   ILE A  36      24.519  20.478  17.876  1.00  0.00           C  
ATOM    140  O   ILE A  36      25.006  20.279  18.986  1.00  0.00           O  
ATOM    141  N   PRO A  37      25.262  20.970  16.883  1.00  0.00           N  
ATOM    142  CA  PRO A  37      26.704  20.949  17.023  1.00  0.00           C  
ATOM    143  C   PRO A  37      27.260  22.057  17.907  1.00  0.00           C  
ATOM    144  O   PRO A  37      26.777  23.187  17.918  1.00  0.00           O  
ATOM    145  N   PRO A  38      28.388  21.956  18.613  1.00  0.00           N  
ATOM    146  CA  PRO A  38      28.680  22.665  19.843  1.00  0.00           C  
ATOM    147  C   PRO A  38      28.785  24.149  19.525  1.00  0.00           C  
ATOM    148  O   PRO A  38      28.301  25.002  20.267  1.00  0.00           O  
ATOM    149  N   ASP A  39      29.320  24.535  18.365  1.00  0.00           N  
ATOM    150  CA  ASP A  39      29.263  25.884  17.839  1.00  0.00           C  
ATOM    151  C   ASP A  39      27.998  26.719  17.968  1.00  0.00           C  
ATOM    152  O   ASP A  39      27.911  27.843  18.460  1.00  0.00           O  
ATOM    153  N   GLN A  40      26.903  26.041  17.616  1.00  0.00           N  
ATOM    154  CA  GLN A  40      25.533  26.500  17.511  1.00  0.00           C  
ATOM    155  C   GLN A  40      24.883  26.822  18.850  1.00  0.00           C  
ATOM    156  O   GLN A  40      23.766  27.336  18.866  1.00  0.00           O  
ATOM    157  N   GLN A  41      25.445  26.315  19.949  1.00  0.00           N  
ATOM    158  CA  GLN A  41      24.861  26.315  21.276  1.00  0.00           C  
ATOM    159  C   GLN A  41      25.407  27.532  22.009  1.00  0.00           C  
ATOM    160  O   GLN A  41      26.620  27.720  22.057  1.00  0.00           O  
ATOM    161  N   ARG A  42      24.465  28.255  22.619  1.00  0.00           N  
ATOM    162  CA  ARG A  42      24.668  29.438  23.431  1.00  0.00           C  
ATOM    163  C   ARG A  42      23.899  29.194  24.722  1.00  0.00           C  
ATOM    164  O   ARG A  42      22.681  29.354  24.734  1.00  0.00           O  
ATOM    165  N   LEU A  43      24.542  28.788  25.819  1.00  0.00           N  
ATOM    166  CA  LEU A  43      23.886  28.539  27.087  1.00  0.00           C  
ATOM    167  C   LEU A  43      23.778  29.811  27.917  1.00  0.00           C  
ATOM    168  O   LEU A  43      24.695  30.602  28.125  1.00  0.00           O  
ATOM    169  N   ILE A  44      22.632  29.919  28.594  1.00  0.00           N  
ATOM    170  CA  ILE A  44      22.316  30.878  29.634  1.00  0.00           C  
ATOM    171  C   ILE A  44      22.023  30.215  30.972  1.00  0.00           C  
ATOM    172  O   ILE A  44      21.189  29.314  31.016  1.00  0.00           O  
ATOM    173  N   PHE A  45      22.621  30.664  32.077  1.00  0.00           N  
ATOM    174  CA  PHE A  45      22.303  30.598  33.489  1.00  0.00           C  
ATOM    175  C   PHE A  45      22.501  31.924  34.210  1.00  0.00           C  
ATOM    176  O   PHE A  45      23.450  32.671  33.984  1.00  0.00           O  
ATOM    177  N   ALA A  46      21.553  32.313  35.067  1.00  0.00           N  
ATOM    178  CA  ALA A  46      21.683  33.511  35.873  1.00  0.00           C  
ATOM    179  C   ALA A  46      22.207  34.721  35.114  1.00  0.00           C  
ATOM    180  O   ALA A  46      23.226  35.287  35.502  1.00  0.00           O  
ATOM    181  N   GLY A  47      21.487  34.935  34.011  1.00  0.00           N  
ATOM    182  CA  GLY A  47      21.886  36.021  33.138  1.00  0.00           C  
ATOM    183  C   GLY A  47      23.227  36.035  32.419  1.00  0.00           C  
ATOM    184  O   GLY A  47      23.442  36.948  31.624  1.00  0.00           O  
ATOM    185  N   LYS A  48      24.035  35.003  32.672  1.00  0.00           N  
ATOM    186  CA  LYS A  48      25.401  34.775  32.248  1.00  0.00           C  
ATOM    187  C   LYS A  48      25.658  33.723  31.178  1.00  0.00           C  
ATOM    188  O   LYS A  48      25.112  32.621  31.191  1.00  0.00           O  
ATOM    189  N   GLN A  49      26.138  34.320  30.086  1.00  0.00           N  
ATOM    190  CA  GLN A  49      26.440  33.448  28.968  1.00  0.00           C  
ATOM    191  C   GLN A  49      27.603  32.561  29.390  1.00  0.00           C  
ATOM    192  O   GLN A  49      28.507  33.139  29.989  1.00  0.00           O  
ATOM    193  N   LEU A  50      27.631  31.267  29.063  1.00  0.00           N  
ATOM    194  CA  LEU A  50      28.556  30.300  29.621  1.00  0.00           C  
ATOM    195  C   LEU A  50      29.592  29.866  28.594  1.00  0.00           C  
ATOM    196  O   LEU A  50      29.235  29.538  27.464  1.00  0.00           O  
ATOM    197  N   GLU A  51      30.865  29.891  28.991  1.00  0.00           N  
ATOM    198  CA  GLU A  51      31.953  29.990  28.040  1.00  0.00           C  
ATOM    199  C   GLU A  51      32.595  28.621  27.870  1.00  0.00           C  
ATOM    200  O   GLU A  51      33.081  28.105  28.873  1.00  0.00           O  
ATOM    201  N   ASP A  52      32.896  28.147  26.659  1.00  0.00           N  
ATOM    202  CA  ASP A  52      33.358  26.807  26.355  1.00  0.00           C  
ATOM    203  C   ASP A  52      34.304  26.144  27.345  1.00  0.00           C  
ATOM    204  O   ASP A  52      34.038  25.127  27.982  1.00  0.00           O  
ATOM    205  N   GLY A  53      35.497  26.695  27.582  1.00  0.00           N  
ATOM    206  CA  GLY A  53      36.617  26.021  28.206  1.00  0.00           C  
ATOM    207  C   GLY A  53      36.624  25.936  29.726  1.00  0.00           C  
ATOM    208  O   GLY A  53      37.642  25.673  30.362  1.00  0.00           O  
ATOM    209  N   ARG A  54      35.471  26.231  30.333  1.00  0.00           N  
ATOM    210  CA  ARG A  54      35.344  26.417  31.764  1.00  0.00           C  
ATOM    211  C   ARG A  54      34.352  25.474  32.430  1.00  0.00           C  
ATOM    212  O   ARG A  54      33.394  25.011  31.816  1.00  0.00           O  
ATOM    213  N   THR A  55      34.653  25.090  33.673  1.00  0.00           N  
ATOM    214  CA  THR A  55      33.924  24.203  34.559  1.00  0.00           C  
ATOM    215  C   THR A  55      32.624  24.895  34.941  1.00  0.00           C  
ATOM    216  O   THR A  55      32.577  26.077  35.276  1.00  0.00           O  
ATOM    217  N   LEU A  56      31.630  24.014  35.077  1.00  0.00           N  
ATOM    218  CA  LEU A  56      30.489  24.220  35.948  1.00  0.00           C  
ATOM    219  C   LEU A  56      30.802  24.816  37.313  1.00  0.00           C  
ATOM    220  O   LEU A  56      29.990  25.621  37.765  1.00  0.00           O  
ATOM    221  N   SER A  57      31.808  24.387  38.078  1.00  0.00           N  
ATOM    222  CA  SER A  57      32.231  24.921  39.357  1.00  0.00           C  
ATOM    223  C   SER A  57      32.598  26.395  39.261  1.00  0.00           C  
ATOM    224  O   SER A  57      32.113  27.157  40.094  1.00  0.00           O  
ATOM    225  N   ASP A  58      33.146  26.911  38.159  1.00  0.00           N  
ATOM    226  CA  ASP A  58      33.358  28.332  37.976  1.00  0.00           C  
ATOM    227  C   ASP A  58      32.122  29.217  37.904  1.00  0.00           C  
ATOM    228  O   ASP A  58      32.079  30.395  38.253  1.00  0.00           O  
ATOM    229  N   TYR A  59      30.977  28.646  37.524  1.00  0.00           N  
ATOM    230  CA  TYR A  59      29.629  29.177  37.538  1.00  0.00           C  
ATOM    231  C   TYR A  59      28.821  28.996  38.815  1.00  0.00           C  
ATOM    232  O   TYR A  59      27.653  29.374  38.885  1.00  0.00           O  
ATOM    233  N   ASN A  60      29.355  28.256  39.789  1.00  0.00           N  
ATOM    234  CA  ASN A  60      28.708  27.965  41.052  1.00  0.00           C  
ATOM    235  C   ASN A  60      27.419  27.216  40.747  1.00  0.00           C  
ATOM    236  O   ASN A  60      26.365  27.280  41.378  1.00  0.00           O  
ATOM    237  N   ILE A  61      27.349  26.539  39.598  1.00  0.00           N  
ATOM    238  CA  ILE A  61      26.152  25.885  39.108  1.00  0.00           C  
ATOM    239  C   ILE A  61      26.024  24.581  39.882  1.00  0.00           C  
ATOM    240  O   ILE A  61      26.991  23.822  39.924  1.00  0.00           O  
ATOM    241  N   GLN A  62      24.880  24.369  40.538  1.00  0.00           N  
ATOM    242  CA  GLN A  62      24.665  23.296  41.486  1.00  0.00           C  
ATOM    243  C   GLN A  62      23.585  22.369  40.945  1.00  0.00           C  
ATOM    244  O   GLN A  62      22.938  22.664  39.943  1.00  0.00           O  
ATOM    245  N   LYS A  63      23.355  21.258  41.648  1.00  0.00           N  
ATOM    246  CA  LYS A  63      22.432  20.169  41.400  1.00  0.00           C  
ATOM    247  C   LYS A  63      21.033  20.739  41.218  1.00  0.00           C  
ATOM    248  O   LYS A  63      20.422  21.428  42.032  1.00  0.00           O  
ATOM    249  N   GLU A  64      20.483  20.298  40.083  1.00  0.00           N  
ATOM    250  CA  GLU A  64      19.177  20.721  39.620  1.00  0.00           C  
ATOM    251  C   GLU A  64      19.011  22.107  39.015  1.00  0.00           C  
ATOM    252  O   GLU A  64      17.971  22.627  38.618  1.00  0.00           O  
ATOM    253  N   SER A  65      20.123  22.765  38.680  1.00  0.00           N  
ATOM    254  CA  SER A  65      20.224  23.904  37.791  1.00  0.00           C  
ATOM    255  C   SER A  65      19.488  23.718  36.472  1.00  0.00           C  
ATOM    256  O   SER A  65      19.845  22.799  35.738  1.00  0.00           O  
ATOM    257  N   THR A  66      18.778  24.765  36.049  1.00  0.00           N  
ATOM    258  CA  THR A  66      18.172  24.931  34.742  1.00  0.00           C  
ATOM    259  C   THR A  66      18.797  25.946  33.796  1.00  0.00           C  
ATOM    260  O   THR A  66      18.882  27.127  34.124  1.00  0.00           O  
ATOM    261  N   LEU A  67      19.314  25.560  32.627  1.00  0.00           N  
ATOM    262  CA  LEU A  67      19.818  26.531  31.678  1.00  0.00           C  
ATOM    263  C   LEU A  67      18.828  26.763  30.545  1.00  0.00           C  
ATOM    264  O   LEU A  67      17.900  25.991  30.315  1.00  0.00           O  
ATOM    265  N   HIS A  68      18.897  27.918  29.879  1.00  0.00           N  
ATOM    266  CA  HIS A  68      18.206  28.384  28.695  1.00  0.00           C  
ATOM    267  C   HIS A  68      19.086  28.359  27.453  1.00  0.00           C  
ATOM    268  O   HIS A  68      19.641  29.380  27.052  1.00  0.00           O  
ATOM    269  N   LEU A  69      19.479  27.183  26.958  1.00  0.00           N  
ATOM    270  CA  LEU A  69      20.164  27.157  25.681  1.00  0.00           C  
ATOM    271  C   LEU A  69      19.550  27.985  24.561  1.00  0.00           C  
ATOM    272  O   LEU A  69      18.377  27.756  24.274  1.00  0.00           O  
ATOM    273  N   VAL A  70      20.182  28.844  23.758  1.00  0.00           N  
ATOM    274  CA  VAL A  70      19.694  29.394  22.510  1.00  0.00           C  
ATOM    275  C   VAL A  70      20.695  29.160  21.387  1.00  0.00           C  
ATOM    276  O   VAL A  70      21.699  28.469  21.540  1.00  0.00           O  
TER
ENDMDL
MODEL      14
ATOM      1  N   GLN A   2      22.354  15.271  38.189  1.00  0.00           N  
ATOM      2  CA  GLN A   2      21.486  15.761  37.137  1.00  0.00           C  
ATOM      3  C   GLN A   2      21.391  17.277  37.050  1.00  0.00           C  
ATOM      4  O   GLN A   2      21.412  17.956  38.074  1.00  0.00           O  
ATOM      5  N   ILE A   3      21.430  17.864  35.851  1.00  0.00           N  
ATOM      6  CA  ILE A   3      21.029  19.174  35.378  1.00  0.00           C  
ATOM      7  C   ILE A   3      20.116  19.219  34.161  1.00  0.00           C  
ATOM      8  O   ILE A   3      19.979  18.271  33.391  1.00  0.00           O  
ATOM      9  N   PHE A   4      19.396  20.339  34.064  1.00  0.00           N  
ATOM     10  CA  PHE A   4      18.488  20.447  32.939  1.00  0.00           C  
ATOM     11  C   PHE A   4      19.000  21.415  31.883  1.00  0.00           C  
ATOM     12  O   PHE A   4      19.256  22.574  32.203  1.00  0.00           O  
ATOM     13  N   VAL A   5      18.943  21.033  30.604  1.00  0.00           N  
ATOM     14  CA  VAL A   5      18.878  22.090  29.616  1.00  0.00           C  
ATOM     15  C   VAL A   5      17.470  22.203  29.051  1.00  0.00           C  
ATOM     16  O   VAL A   5      16.793  21.261  28.645  1.00  0.00           O  
ATOM     17  N   LYS A   6      16.954  23.429  29.165  1.00  0.00           N  
ATOM     18  CA  LYS A   6      15.684  23.784  28.563  1.00  0.00           C  
ATOM     19  C   LYS A   6      15.872  24.595  27.289  1.00  0.00           C  
ATOM     20  O   LYS A   6      16.813  25.383  27.228  1.00  0.00           O  
ATOM     21  N   THR A   7      14.874  24.568  26.402  1.00  0.00           N  
ATOM     22  CA  THR A   7      15.055  25.270  25.147  1.00  0.00           C  
ATOM     23  C   THR A   7      14.255  26.558  25.025  1.00  0.00           C  
ATOM     24  O   THR A   7      13.433  26.908  25.869  1.00  0.00           O  
ATOM     25  N   LEU A   8      14.466  27.297  23.934  1.00  0.00           N  
ATOM     26  CA  LEU A   8      13.578  28.390  23.591  1.00  0.00           C  
ATOM     27  C   LEU A   8      12.218  27.960  23.061  1.00  0.00           C  
ATOM     28  O   LEU A   8      11.306  28.774  23.170  1.00  0.00           O  
ATOM     29  N   THR A   9      12.134  26.699  22.630  1.00  0.00           N  
ATOM     30  CA  THR A   9      10.904  26.004  22.306  1.00  0.00           C  
ATOM     31  C   THR A   9      10.093  25.288  23.375  1.00  0.00           C  
ATOM     32  O   THR A   9       8.908  25.042  23.153  1.00  0.00           O  
ATOM     33  N   GLY A  10      10.677  24.937  24.523  1.00  0.00           N  
ATOM     34  CA  GLY A  10       9.814  24.489  25.597  1.00  0.00           C  
ATOM     35  C   GLY A  10       9.960  23.008  25.917  1.00  0.00           C  
ATOM     36  O   GLY A  10       9.302  22.698  26.907  1.00  0.00           O  
ATOM     37  N   LYS A  11      10.872  22.322  25.225  1.00  0.00           N  
ATOM     38  CA  LYS A  11      11.364  21.031  25.664  1.00  0.00           C  
ATOM     39  C   LYS A  11      12.246  21.335  26.867  1.00  0.00           C  
ATOM     40  O   LYS A  11      13.237  22.058  26.789  1.00  0.00           O  
ATOM     41  N   THR A  12      12.123  20.567  27.952  1.00  0.00           N  
ATOM     42  CA  THR A  12      13.095  20.381  29.012  1.00  0.00           C  
ATOM     43  C   THR A  12      13.801  19.054  28.770  1.00  0.00           C  
ATOM     44  O   THR A  12      13.129  18.081  28.435  1.00  0.00           O  
ATOM     45  N   ILE A  13      15.123  18.983  28.937  1.00  0.00           N  
ATOM     46  CA  ILE A  13      15.910  17.792  28.690  1.00  0.00           C  
ATOM     47  C   ILE A  13      16.838  17.461  29.850  1.00  0.00           C  
ATOM     48  O   ILE A  13      17.173  18.397  30.574  1.00  0.00           O  
ATOM     49  N   THR A  14      17.163  16.192  30.105  1.00  0.00           N  
ATOM     50  CA  THR A  14      17.932  15.878  31.293  1.00  0.00           C  
ATOM     51  C   THR A  14      19.243  15.203  30.919  1.00  0.00           C  
ATOM     52  O   THR A  14      19.260  14.310  30.074  1.00  0.00           O  
ATOM     53  N   LEU A  15      20.312  15.734  31.518  1.00  0.00           N  
ATOM     54  CA  LEU A  15      21.710  15.356  31.473  1.00  0.00           C  
ATOM     55  C   LEU A  15      22.411  15.199  32.814  1.00  0.00           C  
ATOM     56  O   LEU A  15      21.997  15.755  33.830  1.00  0.00           O  
ATOM     57  N   GLU A  16      23.428  14.333  32.813  1.00  0.00           N  
ATOM     58  CA  GLU A  16      24.196  14.064  34.011  1.00  0.00           C  
ATOM     59  C   GLU A  16      25.667  14.440  33.902  1.00  0.00           C  
ATOM     60  O   GLU A  16      26.292  14.281  32.856  1.00  0.00           O  
ATOM     61  N   VAL A  17      26.121  15.192  34.907  1.00  0.00           N  
ATOM     62  CA  VAL A  17      27.424  15.810  35.052  1.00  0.00           C  
ATOM     63  C   VAL A  17      28.043  15.712  36.439  1.00  0.00           C  
ATOM     64  O   VAL A  17      27.338  15.244  37.330  1.00  0.00           O  
ATOM     65  N   GLU A  18      29.234  16.288  36.613  1.00  0.00           N  
ATOM     66  CA  GLU A  18      29.732  16.422  37.967  1.00  0.00           C  
ATOM     67  C   GLU A  18      30.328  17.812  38.132  1.00  0.00           C  
ATOM     68  O   GLU A  18      30.523  18.389  37.064  1.00  0.00           O  
ATOM     69  N   PRO A  19      30.423  18.445  39.304  1.00  0.00           N  
ATOM     70  CA  PRO A  19      30.984  19.776  39.424  1.00  0.00           C  
ATOM     71  C   PRO A  19      32.147  20.120  38.504  1.00  0.00           C  
ATOM     72  O   PRO A  19      32.281  21.227  37.986  1.00  0.00           O  
ATOM     73  N   SER A  20      33.066  19.189  38.239  1.00  0.00           N  
ATOM     74  CA  SER A  20      34.205  19.291  37.349  1.00  0.00           C  
ATOM     75  C   SER A  20      33.961  19.222  35.848  1.00  0.00           C  
ATOM     76  O   SER A  20      35.027  19.136  35.242  1.00  0.00           O  
ATOM     77  N   ASP A  21      32.792  19.064  35.223  1.00  0.00           N  
ATOM     78  CA  ASP A  21      32.597  19.219  33.796  1.00  0.00           C  
ATOM     79  C   ASP A  21      32.898  20.665  33.434  1.00  0.00           C  
ATOM     80  O   ASP A  21      32.566  21.628  34.123  1.00  0.00           O  
ATOM     81  N   THR A  22      33.348  20.770  32.182  1.00  0.00           N  
ATOM     82  CA  THR A  22      33.417  22.015  31.443  1.00  0.00           C  
ATOM     83  C   THR A  22      32.157  22.363  30.665  1.00  0.00           C  
ATOM     84  O   THR A  22      31.337  21.507  30.341  1.00  0.00           O  
ATOM     85  N   ILE A  23      31.893  23.626  30.317  1.00  0.00           N  
ATOM     86  CA  ILE A  23      30.775  23.806  29.413  1.00  0.00           C  
ATOM     87  C   ILE A  23      30.913  23.089  28.079  1.00  0.00           C  
ATOM     88  O   ILE A  23      29.891  22.653  27.553  1.00  0.00           O  
ATOM     89  N   GLU A  24      32.107  22.696  27.630  1.00  0.00           N  
ATOM     90  CA  GLU A  24      32.362  21.983  26.395  1.00  0.00           C  
ATOM     91  C   GLU A  24      32.027  20.506  26.551  1.00  0.00           C  
ATOM     92  O   GLU A  24      31.470  19.896  25.641  1.00  0.00           O  
ATOM     93  N   ASN A  25      32.398  19.901  27.681  1.00  0.00           N  
ATOM     94  CA  ASN A  25      31.912  18.587  28.052  1.00  0.00           C  
ATOM     95  C   ASN A  25      30.393  18.518  27.985  1.00  0.00           C  
ATOM     96  O   ASN A  25      29.872  17.458  27.644  1.00  0.00           O  
ATOM     97  N   VAL A  26      29.689  19.527  28.506  1.00  0.00           N  
ATOM     98  CA  VAL A  26      28.242  19.535  28.583  1.00  0.00           C  
ATOM     99  C   VAL A  26      27.558  19.903  27.274  1.00  0.00           C  
ATOM    100  O   VAL A  26      26.463  19.468  26.928  1.00  0.00           O  
ATOM    101  N   LYS A  27      28.296  20.647  26.448  1.00  0.00           N  
ATOM    102  CA  LYS A  27      27.847  20.852  25.086  1.00  0.00           C  
ATOM    103  C   LYS A  27      27.946  19.559  24.290  1.00  0.00           C  
ATOM    104  O   LYS A  27      26.895  19.255  23.729  1.00  0.00           O  
ATOM    105  N   ALA A  28      29.028  18.779  24.339  1.00  0.00           N  
ATOM    106  CA  ALA A  28      28.905  17.465  23.742  1.00  0.00           C  
ATOM    107  C   ALA A  28      27.777  16.612  24.306  1.00  0.00           C  
ATOM    108  O   ALA A  28      27.359  15.805  23.480  1.00  0.00           O  
ATOM    109  N   LYS A  29      27.315  16.740  25.553  1.00  0.00           N  
ATOM    110  CA  LYS A  29      26.215  15.948  26.066  1.00  0.00           C  
ATOM    111  C   LYS A  29      24.901  16.376  25.431  1.00  0.00           C  
ATOM    112  O   LYS A  29      24.108  15.623  24.868  1.00  0.00           O  
ATOM    113  N   ILE A  30      24.647  17.685  25.482  1.00  0.00           N  
ATOM    114  CA  ILE A  30      23.558  18.190  24.669  1.00  0.00           C  
ATOM    115  C   ILE A  30      23.555  17.672  23.239  1.00  0.00           C  
ATOM    116  O   ILE A  30      22.543  17.284  22.662  1.00  0.00           O  
ATOM    117  N   GLN A  31      24.743  17.694  22.627  1.00  0.00           N  
ATOM    118  CA  GLN A  31      24.931  17.171  21.290  1.00  0.00           C  
ATOM    119  C   GLN A  31      24.485  15.726  21.124  1.00  0.00           C  
ATOM    120  O   GLN A  31      23.810  15.548  20.111  1.00  0.00           O  
ATOM    121  N   ASP A  32      24.965  14.824  21.983  1.00  0.00           N  
ATOM    122  CA  ASP A  32      24.785  13.390  21.884  1.00  0.00           C  
ATOM    123  C   ASP A  32      23.299  13.067  21.946  1.00  0.00           C  
ATOM    124  O   ASP A  32      22.938  12.011  21.429  1.00  0.00           O  
ATOM    125  N   LYS A  33      22.428  13.941  22.455  1.00  0.00           N  
ATOM    126  CA  LYS A  33      21.013  13.623  22.452  1.00  0.00           C  
ATOM    127  C   LYS A  33      20.227  14.418  21.419  1.00  0.00           C  
ATOM    128  O   LYS A  33      19.305  13.919  20.776  1.00  0.00           O  
ATOM    129  N   GLU A  34      20.488  15.714  21.233  1.00  0.00           N  
ATOM    130  CA  GLU A  34      19.661  16.620  20.462  1.00  0.00           C  
ATOM    131  C   GLU A  34      20.021  16.948  19.021  1.00  0.00           C  
ATOM    132  O   GLU A  34      19.184  17.372  18.226  1.00  0.00           O  
ATOM    133  N   GLY A  35      21.305  16.725  18.728  1.00  0.00           N  
ATOM    134  CA  GLY A  35      22.029  16.903  17.486  1.00  0.00           C  
ATOM    135  C   GLY A  35      22.481  18.298  17.074  1.00  0.00           C  
ATOM    136  O   GLY A  35      22.711  18.486  15.882  1.00  0.00           O  
ATOM    137  N   ILE A  36      22.589  19.254  18.000  1.00  0.00           N  
ATOM    138  CA  ILE A  36      22.863  20.652  17.735  1.00  0.00           C  
ATOM    139  C   ILE A  36      24.362  20.851  17.917  1.00  0.00           C  
ATOM    140  O   ILE A  36      24.918  20.503  18.956  1.00  0.00           O  
ATOM    141  N   PRO A  37      25.137  21.266  16.913  1.00  0.00           N  
ATOM    142  CA  PRO A  37      26.583  21.337  16.928  1.00  0.00           C  
ATOM    143  C   PRO A  37      27.165  22.325  17.930  1.00  0.00           C  
ATOM    144  O   PRO A  37      26.455  23.252  18.311  1.00  0.00           O  
ATOM    145  N   PRO A  38      28.429  22.199  18.340  1.00  0.00           N  
ATOM    146  CA  PRO A  38      28.899  23.082  19.390  1.00  0.00           C  
ATOM    147  C   PRO A  38      28.772  24.566  19.073  1.00  0.00           C  
ATOM    148  O   PRO A  38      28.541  25.246  20.070  1.00  0.00           O  
ATOM    149  N   ASP A  39      28.869  25.026  17.824  1.00  0.00           N  
ATOM    150  CA  ASP A  39      28.962  26.435  17.501  1.00  0.00           C  
ATOM    151  C   ASP A  39      27.572  27.030  17.334  1.00  0.00           C  
ATOM    152  O   ASP A  39      27.425  28.249  17.278  1.00  0.00           O  
ATOM    153  N   GLN A  40      26.465  26.285  17.279  1.00  0.00           N  
ATOM    154  CA  GLN A  40      25.117  26.807  17.171  1.00  0.00           C  
ATOM    155  C   GLN A  40      24.645  26.925  18.614  1.00  0.00           C  
ATOM    156  O   GLN A  40      23.653  27.638  18.748  1.00  0.00           O  
ATOM    157  N   GLN A  41      25.081  26.174  19.627  1.00  0.00           N  
ATOM    158  CA  GLN A  41      24.701  26.213  21.024  1.00  0.00           C  
ATOM    159  C   GLN A  41      25.107  27.556  21.614  1.00  0.00           C  
ATOM    160  O   GLN A  41      26.298  27.666  21.897  1.00  0.00           O  
ATOM    161  N   ARG A  42      24.144  28.396  21.999  1.00  0.00           N  
ATOM    162  CA  ARG A  42      24.389  29.410  23.005  1.00  0.00           C  
ATOM    163  C   ARG A  42      23.867  28.749  24.273  1.00  0.00           C  
ATOM    164  O   ARG A  42      22.667  28.481  24.268  1.00  0.00           O  
ATOM    165  N   LEU A  43      24.645  28.548  25.339  1.00  0.00           N  
ATOM    166  CA  LEU A  43      24.236  28.258  26.699  1.00  0.00           C  
ATOM    167  C   LEU A  43      24.330  29.513  27.553  1.00  0.00           C  
ATOM    168  O   LEU A  43      25.234  30.323  27.363  1.00  0.00           O  
ATOM    169  N   ILE A  44      23.297  29.634  28.393  1.00  0.00           N  
ATOM    170  CA  ILE A  44      22.925  30.781  29.196  1.00  0.00           C  
ATOM    171  C   ILE A  44      22.632  30.250  30.591  1.00  0.00           C  
ATOM    172  O   ILE A  44      21.988  29.215  30.743  1.00  0.00           O  
ATOM    173  N   PHE A  45      23.134  30.945  31.614  1.00  0.00           N  
ATOM    174  CA  PHE A  45      22.749  30.736  32.996  1.00  0.00           C  
ATOM    175  C   PHE A  45      22.751  32.092  33.686  1.00  0.00           C  
ATOM    176  O   PHE A  45      23.648  32.892  33.429  1.00  0.00           O  
ATOM    177  N   ALA A  46      21.696  32.307  34.477  1.00  0.00           N  
ATOM    178  CA  ALA A  46      21.554  33.534  35.233  1.00  0.00           C  
ATOM    179  C   ALA A  46      21.758  34.810  34.427  1.00  0.00           C  
ATOM    180  O   ALA A  46      22.067  35.890  34.923  1.00  0.00           O  
ATOM    181  N   GLY A  47      21.451  34.744  33.129  1.00  0.00           N  
ATOM    182  CA  GLY A  47      21.632  35.910  32.288  1.00  0.00           C  
ATOM    183  C   GLY A  47      23.041  36.217  31.800  1.00  0.00           C  
ATOM    184  O   GLY A  47      23.297  37.309  31.299  1.00  0.00           O  
ATOM    185  N   LYS A  48      23.908  35.208  31.911  1.00  0.00           N  
ATOM    186  CA  LYS A  48      25.165  35.161  31.192  1.00  0.00           C  
ATOM    187  C   LYS A  48      25.335  34.041  30.175  1.00  0.00           C  
ATOM    188  O   LYS A  48      24.955  32.890  30.378  1.00  0.00           O  
ATOM    189  N   GLN A  49      25.766  34.459  28.982  1.00  0.00           N  
ATOM    190  CA  GLN A  49      26.292  33.496  28.036  1.00  0.00           C  
ATOM    191  C   GLN A  49      27.546  32.894  28.652  1.00  0.00           C  
ATOM    192  O   GLN A  49      28.497  33.522  29.113  1.00  0.00           O  
ATOM    193  N   LEU A  50      27.771  31.580  28.583  1.00  0.00           N  
ATOM    194  CA  LEU A  50      28.886  30.854  29.155  1.00  0.00           C  
ATOM    195  C   LEU A  50      30.118  30.834  28.261  1.00  0.00           C  
ATOM    196  O   LEU A  50      29.982  31.055  27.061  1.00  0.00           O  
ATOM    197  N   GLU A  51      31.232  30.270  28.734  1.00  0.00           N  
ATOM    198  CA  GLU A  51      32.514  30.242  28.059  1.00  0.00           C  
ATOM    199  C   GLU A  51      33.056  28.820  28.062  1.00  0.00           C  
ATOM    200  O   GLU A  51      33.182  28.293  29.165  1.00  0.00           O  
ATOM    201  N   ASP A  52      33.461  28.293  26.905  1.00  0.00           N  
ATOM    202  CA  ASP A  52      33.322  26.854  26.813  1.00  0.00           C  
ATOM    203  C   ASP A  52      34.214  25.955  27.658  1.00  0.00           C  
ATOM    204  O   ASP A  52      33.639  25.069  28.285  1.00  0.00           O  
ATOM    205  N   GLY A  53      35.517  26.092  27.914  1.00  0.00           N  
ATOM    206  CA  GLY A  53      36.301  25.466  28.959  1.00  0.00           C  
ATOM    207  C   GLY A  53      35.990  25.672  30.435  1.00  0.00           C  
ATOM    208  O   GLY A  53      36.753  25.115  31.223  1.00  0.00           O  
ATOM    209  N   ARG A  54      35.113  26.626  30.753  1.00  0.00           N  
ATOM    210  CA  ARG A  54      34.882  27.076  32.111  1.00  0.00           C  
ATOM    211  C   ARG A  54      33.935  26.133  32.841  1.00  0.00           C  
ATOM    212  O   ARG A  54      33.035  25.637  32.165  1.00  0.00           O  
ATOM    213  N   THR A  55      34.325  25.640  34.018  1.00  0.00           N  
ATOM    214  CA  THR A  55      33.602  24.531  34.607  1.00  0.00           C  
ATOM    215  C   THR A  55      32.367  25.028  35.346  1.00  0.00           C  
ATOM    216  O   THR A  55      32.145  26.180  35.713  1.00  0.00           O  
ATOM    217  N   LEU A  56      31.410  24.100  35.410  1.00  0.00           N  
ATOM    218  CA  LEU A  56      30.144  24.101  36.116  1.00  0.00           C  
ATOM    219  C   LEU A  56      30.198  24.798  37.468  1.00  0.00           C  
ATOM    220  O   LEU A  56      29.280  25.537  37.817  1.00  0.00           O  
ATOM    221  N   SER A  57      31.105  24.215  38.255  1.00  0.00           N  
ATOM    222  CA  SER A  57      31.639  24.805  39.466  1.00  0.00           C  
ATOM    223  C   SER A  57      31.779  26.306  39.674  1.00  0.00           C  
ATOM    224  O   SER A  57      31.358  26.921  40.650  1.00  0.00           O  
ATOM    225  N   ASP A  58      32.235  26.948  38.596  1.00  0.00           N  
ATOM    226  CA  ASP A  58      32.687  28.325  38.613  1.00  0.00           C  
ATOM    227  C   ASP A  58      31.519  29.297  38.698  1.00  0.00           C  
ATOM    228  O   ASP A  58      31.438  30.296  39.408  1.00  0.00           O  
ATOM    229  N   TYR A  59      30.474  28.882  37.978  1.00  0.00           N  
ATOM    230  CA  TYR A  59      29.207  29.577  37.868  1.00  0.00           C  
ATOM    231  C   TYR A  59      28.165  29.116  38.877  1.00  0.00           C  
ATOM    232  O   TYR A  59      26.960  29.310  38.729  1.00  0.00           O  
ATOM    233  N   ASN A  60      28.459  28.315  39.903  1.00  0.00           N  
ATOM    234  CA  ASN A  60      27.513  27.656  40.782  1.00  0.00           C  
ATOM    235  C   ASN A  60      26.515  26.724  40.109  1.00  0.00           C  
ATOM    236  O   ASN A  60      25.365  26.717  40.544  1.00  0.00           O  
ATOM    237  N   ILE A  61      26.954  25.869  39.183  1.00  0.00           N  
ATOM    238  CA  ILE A  61      26.013  24.945  38.584  1.00  0.00           C  
ATOM    239  C   ILE A  61      26.045  23.606  39.307  1.00  0.00           C  
ATOM    240  O   ILE A  61      27.006  22.847  39.202  1.00  0.00           O  
ATOM    241  N   GLN A  62      25.075  23.467  40.214  1.00  0.00           N  
ATOM    242  CA  GLN A  62      24.783  22.447  41.201  1.00  0.00           C  
ATOM    243  C   GLN A  62      23.546  21.714  40.705  1.00  0.00           C  
ATOM    244  O   GLN A  62      22.980  22.058  39.670  1.00  0.00           O  
ATOM    245  N   LYS A  63      23.332  20.563  41.346  1.00  0.00           N  
ATOM    246  CA  LYS A  63      22.138  19.750  41.228  1.00  0.00           C  
ATOM    247  C   LYS A  63      20.944  20.676  41.046  1.00  0.00           C  
ATOM    248  O   LYS A  63      20.533  21.404  41.948  1.00  0.00           O  
ATOM    249  N   GLU A  64      20.420  20.478  39.836  1.00  0.00           N  
ATOM    250  CA  GLU A  64      19.175  20.967  39.280  1.00  0.00           C  
ATOM    251  C   GLU A  64      19.071  22.453  38.966  1.00  0.00           C  
ATOM    252  O   GLU A  64      18.032  23.091  38.819  1.00  0.00           O  
ATOM    253  N   SER A  65      20.260  23.056  38.902  1.00  0.00           N  
ATOM    254  CA  SER A  65      20.390  24.340  38.243  1.00  0.00           C  
ATOM    255  C   SER A  65      20.202  24.065  36.757  1.00  0.00           C  
ATOM    256  O   SER A  65      20.770  23.168  36.137  1.00  0.00           O  
ATOM    257  N   THR A  66      19.318  24.835  36.119  1.00  0.00           N  
ATOM    258  CA  THR A  66      18.896  24.721  34.737  1.00  0.00           C  
ATOM    259  C   THR A  66      19.637  25.684  33.821  1.00  0.00           C  
ATOM    260  O   THR A  66      19.481  26.891  33.994  1.00  0.00           O  
ATOM    261  N   LEU A  67      20.351  25.146  32.830  1.00  0.00           N  
ATOM    262  CA  LEU A  67      20.890  26.012  31.801  1.00  0.00           C  
ATOM    263  C   LEU A  67      19.851  26.225  30.710  1.00  0.00           C  
ATOM    264  O   LEU A  67      19.086  25.351  30.307  1.00  0.00           O  
ATOM    265  N   HIS A  68      19.875  27.420  30.115  1.00  0.00           N  
ATOM    266  CA  HIS A  68      18.991  27.776  29.024  1.00  0.00           C  
ATOM    267  C   HIS A  68      19.705  27.390  27.737  1.00  0.00           C  
ATOM    268  O   HIS A  68      20.863  27.794  27.668  1.00  0.00           O  
ATOM    269  N   LEU A  69      19.126  26.821  26.677  1.00  0.00           N  
ATOM    270  CA  LEU A  69      19.750  26.728  25.371  1.00  0.00           C  
ATOM    271  C   LEU A  69      19.023  27.622  24.375  1.00  0.00           C  
ATOM    272  O   LEU A  69      17.822  27.506  24.145  1.00  0.00           O  
ATOM    273  N   VAL A  70      19.737  28.594  23.804  1.00  0.00           N  
ATOM    274  CA  VAL A  70      19.419  29.336  22.601  1.00  0.00           C  
ATOM    275  C   VAL A  70      20.208  28.827  21.403  1.00  0.00           C  
ATOM    276  O   VAL A  70      21.269  28.236  21.592  1.00  0.00           O  
TER
ENDMDL
MODEL      15
ATOM      1  N   GLN A   2      22.269  16.380  38.939  1.00  0.00           N  
ATOM      2  CA  GLN A   2      21.383  16.625  37.819  1.00  0.00           C  
ATOM      3  C   GLN A   2      21.210  18.118  37.579  1.00  0.00           C  
ATOM      4  O   GLN A   2      21.051  18.768  38.611  1.00  0.00           O  
ATOM      5  N   ILE A   3      21.397  18.614  36.354  1.00  0.00           N  
ATOM      6  CA  ILE A   3      21.016  19.849  35.701  1.00  0.00           C  
ATOM      7  C   ILE A   3      19.996  19.574  34.604  1.00  0.00           C  
ATOM      8  O   ILE A   3      19.964  18.444  34.120  1.00  0.00           O  
ATOM      9  N   PHE A   4      19.173  20.579  34.300  1.00  0.00           N  
ATOM     10  CA  PHE A   4      18.375  20.395  33.105  1.00  0.00           C  
ATOM     11  C   PHE A   4      18.516  21.570  32.146  1.00  0.00           C  
ATOM     12  O   PHE A   4      18.602  22.750  32.479  1.00  0.00           O  
ATOM     13  N   VAL A   5      18.402  21.246  30.856  1.00  0.00           N  
ATOM     14  CA  VAL A   5      18.521  22.282  29.851  1.00  0.00           C  
ATOM     15  C   VAL A   5      17.201  22.375  29.101  1.00  0.00           C  
ATOM     16  O   VAL A   5      16.683  21.495  28.417  1.00  0.00           O  
ATOM     17  N   LYS A   6      16.553  23.541  29.179  1.00  0.00           N  
ATOM     18  CA  LYS A   6      15.249  23.755  28.585  1.00  0.00           C  
ATOM     19  C   LYS A   6      15.496  24.485  27.272  1.00  0.00           C  
ATOM     20  O   LYS A   6      16.338  25.374  27.157  1.00  0.00           O  
ATOM     21  N   THR A   7      14.777  24.168  26.193  1.00  0.00           N  
ATOM     22  CA  THR A   7      14.884  24.846  24.918  1.00  0.00           C  
ATOM     23  C   THR A   7      13.804  25.917  24.876  1.00  0.00           C  
ATOM     24  O   THR A   7      12.817  25.876  25.608  1.00  0.00           O  
ATOM     25  N   LEU A   8      14.074  26.954  24.080  1.00  0.00           N  
ATOM     26  CA  LEU A   8      13.133  27.868  23.463  1.00  0.00           C  
ATOM     27  C   LEU A   8      11.852  27.219  22.962  1.00  0.00           C  
ATOM     28  O   LEU A   8      10.737  27.712  23.122  1.00  0.00           O  
ATOM     29  N   THR A   9      11.993  26.079  22.282  1.00  0.00           N  
ATOM     30  CA  THR A   9      10.926  25.343  21.635  1.00  0.00           C  
ATOM     31  C   THR A   9      10.157  24.307  22.443  1.00  0.00           C  
ATOM     32  O   THR A   9       9.461  23.427  21.941  1.00  0.00           O  
ATOM     33  N   GLY A  10      10.229  24.337  23.776  1.00  0.00           N  
ATOM     34  CA  GLY A  10       9.301  23.585  24.595  1.00  0.00           C  
ATOM     35  C   GLY A  10       9.708  22.246  25.194  1.00  0.00           C  
ATOM     36  O   GLY A  10       8.902  21.939  26.069  1.00  0.00           O  
ATOM     37  N   LYS A  11      10.912  21.715  24.973  1.00  0.00           N  
ATOM     38  CA  LYS A  11      11.392  20.549  25.685  1.00  0.00           C  
ATOM     39  C   LYS A  11      12.454  20.879  26.724  1.00  0.00           C  
ATOM     40  O   LYS A  11      13.217  21.839  26.644  1.00  0.00           O  
ATOM     41  N   THR A  12      12.340  20.071  27.780  1.00  0.00           N  
ATOM     42  CA  THR A  12      13.456  19.887  28.687  1.00  0.00           C  
ATOM     43  C   THR A  12      14.336  18.703  28.316  1.00  0.00           C  
ATOM     44  O   THR A  12      13.793  17.683  27.897  1.00  0.00           O  
ATOM     45  N   ILE A  13      15.649  18.946  28.344  1.00  0.00           N  
ATOM     46  CA  ILE A  13      16.724  17.999  28.128  1.00  0.00           C  
ATOM     47  C   ILE A  13      17.281  17.623  29.493  1.00  0.00           C  
ATOM     48  O   ILE A  13      17.816  18.502  30.165  1.00  0.00           O  
ATOM     49  N   THR A  14      17.103  16.362  29.896  1.00  0.00           N  
ATOM     50  CA  THR A  14      17.625  16.003  31.198  1.00  0.00           C  
ATOM     51  C   THR A  14      19.031  15.491  30.919  1.00  0.00           C  
ATOM     52  O   THR A  14      19.193  14.658  30.030  1.00  0.00           O  
ATOM     53  N   LEU A  15      20.032  15.979  31.655  1.00  0.00           N  
ATOM     54  CA  LEU A  15      21.420  15.564  31.693  1.00  0.00           C  
ATOM     55  C   LEU A  15      21.958  15.159  33.058  1.00  0.00           C  
ATOM     56  O   LEU A  15      21.651  15.743  34.095  1.00  0.00           O  
ATOM     57  N   GLU A  16      22.895  14.208  33.014  1.00  0.00           N  
ATOM     58  CA  GLU A  16      23.781  13.900  34.117  1.00  0.00           C  
ATOM     59  C   GLU A  16      25.094  14.537  33.688  1.00  0.00           C  
ATOM     60  O   GLU A  16      25.595  14.262  32.600  1.00  0.00           O  
ATOM     61  N   VAL A  17      25.476  15.540  34.483  1.00  0.00           N  
ATOM     62  CA  VAL A  17      26.715  16.286  34.568  1.00  0.00           C  
ATOM     63  C   VAL A  17      27.393  16.039  35.907  1.00  0.00           C  
ATOM     64  O   VAL A  17      26.809  15.470  36.826  1.00  0.00           O  
ATOM     65  N   GLU A  18      28.624  16.554  35.965  1.00  0.00           N  
ATOM     66  CA  GLU A  18      29.455  16.419  37.144  1.00  0.00           C  
ATOM     67  C   GLU A  18      30.387  17.609  37.324  1.00  0.00           C  
ATOM     68  O   GLU A  18      30.776  18.262  36.358  1.00  0.00           O  
ATOM     69  N   PRO A  19      30.571  18.031  38.577  1.00  0.00           N  
ATOM     70  CA  PRO A  19      31.149  19.316  38.914  1.00  0.00           C  
ATOM     71  C   PRO A  19      32.431  19.737  38.209  1.00  0.00           C  
ATOM     72  O   PRO A  19      32.546  20.951  38.057  1.00  0.00           O  
ATOM     73  N   SER A  20      33.365  18.851  37.857  1.00  0.00           N  
ATOM     74  CA  SER A  20      34.546  19.208  37.096  1.00  0.00           C  
ATOM     75  C   SER A  20      34.375  19.000  35.598  1.00  0.00           C  
ATOM     76  O   SER A  20      35.346  18.958  34.846  1.00  0.00           O  
ATOM     77  N   ASP A  21      33.160  18.845  35.066  1.00  0.00           N  
ATOM     78  CA  ASP A  21      33.007  18.892  33.626  1.00  0.00           C  
ATOM     79  C   ASP A  21      33.217  20.305  33.100  1.00  0.00           C  
ATOM     80  O   ASP A  21      32.719  21.269  33.678  1.00  0.00           O  
ATOM     81  N   THR A  22      33.842  20.390  31.923  1.00  0.00           N  
ATOM     82  CA  THR A  22      33.879  21.612  31.145  1.00  0.00           C  
ATOM     83  C   THR A  22      32.586  21.925  30.405  1.00  0.00           C  
ATOM     84  O   THR A  22      31.879  20.986  30.050  1.00  0.00           O  
ATOM     85  N   ILE A  23      32.233  23.198  30.212  1.00  0.00           N  
ATOM     86  CA  ILE A  23      31.049  23.566  29.463  1.00  0.00           C  
ATOM     87  C   ILE A  23      31.065  23.071  28.023  1.00  0.00           C  
ATOM     88  O   ILE A  23      29.999  22.610  27.622  1.00  0.00           O  
ATOM     89  N   GLU A  24      32.195  22.911  27.331  1.00  0.00           N  
ATOM     90  CA  GLU A  24      32.231  22.148  26.099  1.00  0.00           C  
ATOM     91  C   GLU A  24      31.879  20.671  26.195  1.00  0.00           C  
ATOM     92  O   GLU A  24      31.123  20.196  25.349  1.00  0.00           O  
ATOM     93  N   ASN A  25      32.267  19.939  27.242  1.00  0.00           N  
ATOM     94  CA  ASN A  25      31.938  18.558  27.532  1.00  0.00           C  
ATOM     95  C   ASN A  25      30.439  18.621  27.781  1.00  0.00           C  
ATOM     96  O   ASN A  25      29.767  17.630  27.502  1.00  0.00           O  
ATOM     97  N   VAL A  26      29.834  19.641  28.395  1.00  0.00           N  
ATOM     98  CA  VAL A  26      28.436  19.740  28.761  1.00  0.00           C  
ATOM     99  C   VAL A  26      27.630  20.067  27.512  1.00  0.00           C  
ATOM    100  O   VAL A  26      26.623  19.375  27.377  1.00  0.00           O  
ATOM    101  N   LYS A  27      28.003  20.870  26.513  1.00  0.00           N  
ATOM    102  CA  LYS A  27      27.408  20.900  25.192  1.00  0.00           C  
ATOM    103  C   LYS A  27      27.474  19.524  24.547  1.00  0.00           C  
ATOM    104  O   LYS A  27      26.447  19.136  23.994  1.00  0.00           O  
ATOM    105  N   ALA A  28      28.646  18.884  24.532  1.00  0.00           N  
ATOM    106  CA  ALA A  28      28.667  17.678  23.729  1.00  0.00           C  
ATOM    107  C   ALA A  28      27.672  16.617  24.182  1.00  0.00           C  
ATOM    108  O   ALA A  28      27.230  15.916  23.275  1.00  0.00           O  
ATOM    109  N   LYS A  29      27.380  16.423  25.470  1.00  0.00           N  
ATOM    110  CA  LYS A  29      26.218  15.723  25.980  1.00  0.00           C  
ATOM    111  C   LYS A  29      24.961  16.170  25.246  1.00  0.00           C  
ATOM    112  O   LYS A  29      24.083  15.345  25.004  1.00  0.00           O  
ATOM    113  N   ILE A  30      24.756  17.465  24.997  1.00  0.00           N  
ATOM    114  CA  ILE A  30      23.638  17.911  24.191  1.00  0.00           C  
ATOM    115  C   ILE A  30      23.710  17.567  22.710  1.00  0.00           C  
ATOM    116  O   ILE A  30      22.691  17.138  22.173  1.00  0.00           O  
ATOM    117  N   GLN A  31      24.839  17.690  22.007  1.00  0.00           N  
ATOM    118  CA  GLN A  31      24.971  17.071  20.704  1.00  0.00           C  
ATOM    119  C   GLN A  31      24.517  15.619  20.654  1.00  0.00           C  
ATOM    120  O   GLN A  31      23.772  15.266  19.743  1.00  0.00           O  
ATOM    121  N   ASP A  32      24.880  14.765  21.613  1.00  0.00           N  
ATOM    122  CA  ASP A  32      24.448  13.386  21.720  1.00  0.00           C  
ATOM    123  C   ASP A  32      22.969  13.075  21.900  1.00  0.00           C  
ATOM    124  O   ASP A  32      22.534  12.181  21.178  1.00  0.00           O  
ATOM    125  N   LYS A  33      22.188  13.967  22.515  1.00  0.00           N  
ATOM    126  CA  LYS A  33      20.748  13.858  22.405  1.00  0.00           C  
ATOM    127  C   LYS A  33      20.184  14.507  21.150  1.00  0.00           C  
ATOM    128  O   LYS A  33      19.231  14.049  20.524  1.00  0.00           O  
ATOM    129  N   GLU A  34      20.569  15.739  20.809  1.00  0.00           N  
ATOM    130  CA  GLU A  34      19.802  16.642  19.974  1.00  0.00           C  
ATOM    131  C   GLU A  34      20.355  17.162  18.654  1.00  0.00           C  
ATOM    132  O   GLU A  34      19.729  17.884  17.880  1.00  0.00           O  
ATOM    133  N   GLY A  35      21.627  16.845  18.403  1.00  0.00           N  
ATOM    134  CA  GLY A  35      22.118  16.986  17.046  1.00  0.00           C  
ATOM    135  C   GLY A  35      22.756  18.341  16.777  1.00  0.00           C  
ATOM    136  O   GLY A  35      22.908  18.647  15.596  1.00  0.00           O  
ATOM    137  N   ILE A  36      22.918  19.226  17.764  1.00  0.00           N  
ATOM    138  CA  ILE A  36      23.348  20.609  17.757  1.00  0.00           C  
ATOM    139  C   ILE A  36      24.818  20.844  18.077  1.00  0.00           C  
ATOM    140  O   ILE A  36      25.115  20.686  19.260  1.00  0.00           O  
ATOM    141  N   PRO A  37      25.744  20.961  17.123  1.00  0.00           N  
ATOM    142  CA  PRO A  37      27.141  21.244  17.384  1.00  0.00           C  
ATOM    143  C   PRO A  37      27.535  22.279  18.427  1.00  0.00           C  
ATOM    144  O   PRO A  37      26.839  23.275  18.615  1.00  0.00           O  
ATOM    145  N   PRO A  38      28.751  22.219  18.973  1.00  0.00           N  
ATOM    146  CA  PRO A  38      29.007  23.177  20.030  1.00  0.00           C  
ATOM    147  C   PRO A  38      28.984  24.639  19.609  1.00  0.00           C  
ATOM    148  O   PRO A  38      28.476  25.446  20.385  1.00  0.00           O  
ATOM    149  N   ASP A  39      29.294  24.990  18.359  1.00  0.00           N  
ATOM    150  CA  ASP A  39      29.159  26.304  17.764  1.00  0.00           C  
ATOM    151  C   ASP A  39      27.758  26.887  17.651  1.00  0.00           C  
ATOM    152  O   ASP A  39      27.501  28.072  17.852  1.00  0.00           O  
ATOM    153  N   GLN A  40      26.732  26.047  17.501  1.00  0.00           N  
ATOM    154  CA  GLN A  40      25.335  26.430  17.513  1.00  0.00           C  
ATOM    155  C   GLN A  40      24.953  26.937  18.896  1.00  0.00           C  
ATOM    156  O   GLN A  40      23.936  27.626  18.916  1.00  0.00           O  
ATOM    157  N   GLN A  41      25.544  26.504  20.013  1.00  0.00           N  
ATOM    158  CA  GLN A  41      24.966  26.659  21.331  1.00  0.00           C  
ATOM    159  C   GLN A  41      25.465  27.835  22.159  1.00  0.00           C  
ATOM    160  O   GLN A  41      26.634  28.103  22.431  1.00  0.00           O  
ATOM    161  N   ARG A  42      24.453  28.589  22.595  1.00  0.00           N  
ATOM    162  CA  ARG A  42      24.540  29.470  23.742  1.00  0.00           C  
ATOM    163  C   ARG A  42      23.850  28.842  24.945  1.00  0.00           C  
ATOM    164  O   ARG A  42      22.639  28.680  24.809  1.00  0.00           O  
ATOM    165  N   LEU A  43      24.577  28.531  26.020  1.00  0.00           N  
ATOM    166  CA  LEU A  43      24.025  28.188  27.315  1.00  0.00           C  
ATOM    167  C   LEU A  43      24.039  29.467  28.139  1.00  0.00           C  
ATOM    168  O   LEU A  43      24.910  30.333  28.161  1.00  0.00           O  
ATOM    169  N   ILE A  44      22.884  29.605  28.795  1.00  0.00           N  
ATOM    170  CA  ILE A  44      22.573  30.701  29.691  1.00  0.00           C  
ATOM    171  C   ILE A  44      22.149  30.235  31.076  1.00  0.00           C  
ATOM    172  O   ILE A  44      21.387  29.290  31.265  1.00  0.00           O  
ATOM    173  N   PHE A  45      22.772  30.742  32.144  1.00  0.00           N  
ATOM    174  CA  PHE A  45      22.532  30.477  33.548  1.00  0.00           C  
ATOM    175  C   PHE A  45      22.583  31.781  34.332  1.00  0.00           C  
ATOM    176  O   PHE A  45      23.499  32.586  34.181  1.00  0.00           O  
ATOM    177  N   ALA A  46      21.546  32.038  35.132  1.00  0.00           N  
ATOM    178  CA  ALA A  46      21.422  33.216  35.967  1.00  0.00           C  
ATOM    179  C   ALA A  46      21.817  34.503  35.257  1.00  0.00           C  
ATOM    180  O   ALA A  46      22.693  35.251  35.684  1.00  0.00           O  
ATOM    181  N   GLY A  47      21.238  34.697  34.069  1.00  0.00           N  
ATOM    182  CA  GLY A  47      21.563  35.748  33.125  1.00  0.00           C  
ATOM    183  C   GLY A  47      22.953  35.807  32.509  1.00  0.00           C  
ATOM    184  O   GLY A  47      23.292  36.863  31.979  1.00  0.00           O  
ATOM    185  N   LYS A  48      23.817  34.789  32.535  1.00  0.00           N  
ATOM    186  CA  LYS A  48      25.184  34.902  32.071  1.00  0.00           C  
ATOM    187  C   LYS A  48      25.564  33.771  31.126  1.00  0.00           C  
ATOM    188  O   LYS A  48      25.113  32.628  31.126  1.00  0.00           O  
ATOM    189  N   GLN A  49      26.176  34.165  30.007  1.00  0.00           N  
ATOM    190  CA  GLN A  49      26.597  33.199  29.012  1.00  0.00           C  
ATOM    191  C   GLN A  49      27.764  32.344  29.483  1.00  0.00           C  
ATOM    192  O   GLN A  49      28.726  32.783  30.110  1.00  0.00           O  
ATOM    193  N   LEU A  50      27.688  31.060  29.128  1.00  0.00           N  
ATOM    194  CA  LEU A  50      28.592  29.990  29.498  1.00  0.00           C  
ATOM    195  C   LEU A  50      29.652  29.789  28.425  1.00  0.00           C  
ATOM    196  O   LEU A  50      29.309  29.762  27.245  1.00  0.00           O  
ATOM    197  N   GLU A  51      30.885  29.623  28.910  1.00  0.00           N  
ATOM    198  CA  GLU A  51      32.086  29.844  28.128  1.00  0.00           C  
ATOM    199  C   GLU A  51      32.887  28.550  28.081  1.00  0.00           C  
ATOM    200  O   GLU A  51      33.123  27.886  29.087  1.00  0.00           O  
ATOM    201  N   ASP A  52      33.183  28.076  26.868  1.00  0.00           N  
ATOM    202  CA  ASP A  52      33.358  26.664  26.592  1.00  0.00           C  
ATOM    203  C   ASP A  52      34.544  25.942  27.214  1.00  0.00           C  
ATOM    204  O   ASP A  52      34.346  24.860  27.763  1.00  0.00           O  
ATOM    205  N   GLY A  53      35.704  26.596  27.305  1.00  0.00           N  
ATOM    206  CA  GLY A  53      36.803  26.151  28.138  1.00  0.00           C  
ATOM    207  C   GLY A  53      36.802  26.463  29.627  1.00  0.00           C  
ATOM    208  O   GLY A  53      37.876  26.484  30.225  1.00  0.00           O  
ATOM    209  N   ARG A  54      35.645  26.812  30.194  1.00  0.00           N  
ATOM    210  CA  ARG A  54      35.434  26.884  31.626  1.00  0.00           C  
ATOM    211  C   ARG A  54      34.569  25.791  32.238  1.00  0.00           C  
ATOM    212  O   ARG A  54      34.121  24.936  31.478  1.00  0.00           O  
ATOM    213  N   THR A  55      34.445  25.523  33.541  1.00  0.00           N  
ATOM    214  CA  THR A  55      33.745  24.407  34.143  1.00  0.00           C  
ATOM    215  C   THR A  55      32.444  24.913  34.748  1.00  0.00           C  
ATOM    216  O   THR A  55      32.214  26.083  35.044  1.00  0.00           O  
ATOM    217  N   LEU A  56      31.587  23.960  35.120  1.00  0.00           N  
ATOM    218  CA  LEU A  56      30.419  24.087  35.968  1.00  0.00           C  
ATOM    219  C   LEU A  56      30.859  24.718  37.282  1.00  0.00           C  
ATOM    220  O   LEU A  56      29.915  25.318  37.790  1.00  0.00           O  
ATOM    221  N   SER A  57      31.912  24.351  38.016  1.00  0.00           N  
ATOM    222  CA  SER A  57      32.441  25.009  39.195  1.00  0.00           C  
ATOM    223  C   SER A  57      32.676  26.502  39.016  1.00  0.00           C  
ATOM    224  O   SER A  57      32.630  27.277  39.969  1.00  0.00           O  
ATOM    225  N   ASP A  58      32.994  27.061  37.846  1.00  0.00           N  
ATOM    226  CA  ASP A  58      33.270  28.464  37.616  1.00  0.00           C  
ATOM    227  C   ASP A  58      32.097  29.432  37.674  1.00  0.00           C  
ATOM    228  O   ASP A  58      32.225  30.589  38.068  1.00  0.00           O  
ATOM    229  N   TYR A  59      30.883  28.879  37.640  1.00  0.00           N  
ATOM    230  CA  TYR A  59      29.666  29.666  37.652  1.00  0.00           C  
ATOM    231  C   TYR A  59      28.883  29.252  38.890  1.00  0.00           C  
ATOM    232  O   TYR A  59      27.806  29.806  39.104  1.00  0.00           O  
ATOM    233  N   ASN A  60      29.355  28.359  39.763  1.00  0.00           N  
ATOM    234  CA  ASN A  60      28.606  27.973  40.940  1.00  0.00           C  
ATOM    235  C   ASN A  60      27.277  27.332  40.565  1.00  0.00           C  
ATOM    236  O   ASN A  60      26.185  27.724  40.971  1.00  0.00           O  
ATOM    237  N   ILE A  61      27.393  26.337  39.683  1.00  0.00           N  
ATOM    238  CA  ILE A  61      26.239  25.549  39.301  1.00  0.00           C  
ATOM    239  C   ILE A  61      26.079  24.353  40.228  1.00  0.00           C  
ATOM    240  O   ILE A  61      27.049  23.685  40.579  1.00  0.00           O  
ATOM    241  N   GLN A  62      24.808  24.113  40.558  1.00  0.00           N  
ATOM    242  CA  GLN A  62      24.393  23.026  41.422  1.00  0.00           C  
ATOM    243  C   GLN A  62      23.211  22.180  40.968  1.00  0.00           C  
ATOM    244  O   GLN A  62      22.610  22.480  39.939  1.00  0.00           O  
ATOM    245  N   LYS A  63      23.029  21.117  41.754  1.00  0.00           N  
ATOM    246  CA  LYS A  63      21.754  20.462  41.960  1.00  0.00           C  
ATOM    247  C   LYS A  63      20.542  21.288  41.553  1.00  0.00           C  
ATOM    248  O   LYS A  63      20.206  22.322  42.125  1.00  0.00           O  
ATOM    249  N   GLU A  64      19.922  20.800  40.475  1.00  0.00           N  
ATOM    250  CA  GLU A  64      18.686  21.246  39.867  1.00  0.00           C  
ATOM    251  C   GLU A  64      18.608  22.653  39.290  1.00  0.00           C  
ATOM    252  O   GLU A  64      17.562  23.290  39.188  1.00  0.00           O  
ATOM    253  N   SER A  65      19.774  23.191  38.925  1.00  0.00           N  
ATOM    254  CA  SER A  65      19.987  24.331  38.056  1.00  0.00           C  
ATOM    255  C   SER A  65      19.408  24.040  36.678  1.00  0.00           C  
ATOM    256  O   SER A  65      20.055  23.334  35.908  1.00  0.00           O  
ATOM    257  N   THR A  66      18.359  24.706  36.189  1.00  0.00           N  
ATOM    258  CA  THR A  66      18.232  25.051  34.788  1.00  0.00           C  
ATOM    259  C   THR A  66      19.085  26.106  34.097  1.00  0.00           C  
ATOM    260  O   THR A  66      19.440  27.189  34.558  1.00  0.00           O  
ATOM    261  N   LEU A  67      19.517  25.697  32.902  1.00  0.00           N  
ATOM    262  CA  LEU A  67      20.136  26.599  31.952  1.00  0.00           C  
ATOM    263  C   LEU A  67      19.333  26.582  30.659  1.00  0.00           C  
ATOM    264  O   LEU A  67      18.679  25.578  30.387  1.00  0.00           O  
ATOM    265  N   HIS A  68      19.355  27.592  29.787  1.00  0.00           N  
ATOM    266  CA  HIS A  68      18.467  27.766  28.655  1.00  0.00           C  
ATOM    267  C   HIS A  68      19.421  27.556  27.487  1.00  0.00           C  
ATOM    268  O   HIS A  68      20.544  28.055  27.509  1.00  0.00           O  
ATOM    269  N   LEU A  69      18.934  26.935  26.412  1.00  0.00           N  
ATOM    270  CA  LEU A  69      19.563  26.777  25.115  1.00  0.00           C  
ATOM    271  C   LEU A  69      18.997  27.728  24.071  1.00  0.00           C  
ATOM    272  O   LEU A  69      17.804  28.001  23.972  1.00  0.00           O  
ATOM    273  N   VAL A  70      19.970  28.397  23.446  1.00  0.00           N  
ATOM    274  CA  VAL A  70      19.761  29.335  22.362  1.00  0.00           C  
ATOM    275  C   VAL A  70      20.737  29.072  21.225  1.00  0.00           C  
ATOM    276  O   VAL A  70      21.849  28.679  21.571  1.00  0.00           O  
TER
ENDMDL
MODEL      16
ATOM      1  N   GLN A   2      22.600  15.985  38.418  1.00  0.00           N  
ATOM      2  CA  GLN A   2      21.627  16.171  37.360  1.00  0.00           C  
ATOM      3  C   GLN A   2      21.127  17.606  37.283  1.00  0.00           C  
ATOM      4  O   GLN A   2      20.742  18.273  38.241  1.00  0.00           O  
ATOM      5  N   ILE A   3      21.198  18.020  36.015  1.00  0.00           N  
ATOM      6  CA  ILE A   3      20.753  19.257  35.407  1.00  0.00           C  
ATOM      7  C   ILE A   3      19.707  19.018  34.326  1.00  0.00           C  
ATOM      8  O   ILE A   3      19.571  17.977  33.690  1.00  0.00           O  
ATOM      9  N   PHE A   4      18.893  20.074  34.270  1.00  0.00           N  
ATOM     10  CA  PHE A   4      17.940  20.266  33.196  1.00  0.00           C  
ATOM     11  C   PHE A   4      18.443  21.173  32.082  1.00  0.00           C  
ATOM     12  O   PHE A   4      19.325  21.992  32.321  1.00  0.00           O  
ATOM     13  N   VAL A   5      17.845  21.046  30.895  1.00  0.00           N  
ATOM     14  CA  VAL A   5      17.839  22.028  29.830  1.00  0.00           C  
ATOM     15  C   VAL A   5      16.465  22.556  29.445  1.00  0.00           C  
ATOM     16  O   VAL A   5      15.663  21.758  28.965  1.00  0.00           O  
ATOM     17  N   LYS A   6      16.133  23.848  29.476  1.00  0.00           N  
ATOM     18  CA  LYS A   6      14.999  24.474  28.827  1.00  0.00           C  
ATOM     19  C   LYS A   6      15.411  25.033  27.473  1.00  0.00           C  
ATOM     20  O   LYS A   6      16.362  25.799  27.335  1.00  0.00           O  
ATOM     21  N   THR A   7      14.758  24.553  26.412  1.00  0.00           N  
ATOM     22  CA  THR A   7      14.966  24.853  25.010  1.00  0.00           C  
ATOM     23  C   THR A   7      14.075  26.014  24.594  1.00  0.00           C  
ATOM     24  O   THR A   7      13.385  26.601  25.425  1.00  0.00           O  
ATOM     25  N   LEU A   8      14.039  26.309  23.292  1.00  0.00           N  
ATOM     26  CA  LEU A   8      13.223  27.288  22.604  1.00  0.00           C  
ATOM     27  C   LEU A   8      11.745  26.923  22.638  1.00  0.00           C  
ATOM     28  O   LEU A   8      10.972  27.649  23.259  1.00  0.00           O  
ATOM     29  N   THR A   9      11.424  25.718  22.163  1.00  0.00           N  
ATOM     30  CA  THR A   9      10.057  25.237  22.219  1.00  0.00           C  
ATOM     31  C   THR A   9       9.669  24.611  23.551  1.00  0.00           C  
ATOM     32  O   THR A   9       8.542  24.127  23.626  1.00  0.00           O  
ATOM     33  N   GLY A  10      10.528  24.600  24.573  1.00  0.00           N  
ATOM     34  CA  GLY A  10      10.238  24.367  25.973  1.00  0.00           C  
ATOM     35  C   GLY A  10      10.180  22.923  26.455  1.00  0.00           C  
ATOM     36  O   GLY A  10       9.706  22.813  27.583  1.00  0.00           O  
ATOM     37  N   LYS A  11      10.613  21.941  25.662  1.00  0.00           N  
ATOM     38  CA  LYS A  11      10.840  20.610  26.188  1.00  0.00           C  
ATOM     39  C   LYS A  11      11.995  20.622  27.178  1.00  0.00           C  
ATOM     40  O   LYS A  11      12.956  21.376  27.037  1.00  0.00           O  
ATOM     41  N   THR A  12      11.784  19.827  28.230  1.00  0.00           N  
ATOM     42  CA  THR A  12      12.808  19.656  29.240  1.00  0.00           C  
ATOM     43  C   THR A  12      13.721  18.495  28.875  1.00  0.00           C  
ATOM     44  O   THR A  12      13.254  17.643  28.122  1.00  0.00           O  
ATOM     45  N   ILE A  13      14.997  18.473  29.268  1.00  0.00           N  
ATOM     46  CA  ILE A  13      15.837  17.312  29.058  1.00  0.00           C  
ATOM     47  C   ILE A  13      16.797  17.159  30.229  1.00  0.00           C  
ATOM     48  O   ILE A  13      17.407  18.176  30.549  1.00  0.00           O  
ATOM     49  N   THR A  14      16.922  15.900  30.656  1.00  0.00           N  
ATOM     50  CA  THR A  14      17.838  15.582  31.732  1.00  0.00           C  
ATOM     51  C   THR A  14      19.181  15.197  31.127  1.00  0.00           C  
ATOM     52  O   THR A  14      19.342  14.227  30.390  1.00  0.00           O  
ATOM     53  N   LEU A  15      20.122  15.959  31.690  1.00  0.00           N  
ATOM     54  CA  LEU A  15      21.511  15.979  31.276  1.00  0.00           C  
ATOM     55  C   LEU A  15      22.366  15.792  32.520  1.00  0.00           C  
ATOM     56  O   LEU A  15      22.168  16.238  33.648  1.00  0.00           O  
ATOM     57  N   GLU A  16      23.371  14.919  32.430  1.00  0.00           N  
ATOM     58  CA  GLU A  16      24.115  14.417  33.568  1.00  0.00           C  
ATOM     59  C   GLU A  16      25.451  15.140  33.478  1.00  0.00           C  
ATOM     60  O   GLU A  16      26.320  14.812  32.673  1.00  0.00           O  
ATOM     61  N   VAL A  17      25.678  16.129  34.346  1.00  0.00           N  
ATOM     62  CA  VAL A  17      26.954  16.801  34.486  1.00  0.00           C  
ATOM     63  C   VAL A  17      27.643  16.618  35.830  1.00  0.00           C  
ATOM     64  O   VAL A  17      27.026  16.234  36.821  1.00  0.00           O  
ATOM     65  N   GLU A  18      28.977  16.587  35.794  1.00  0.00           N  
ATOM     66  CA  GLU A  18      29.696  16.370  37.034  1.00  0.00           C  
ATOM     67  C   GLU A  18      30.494  17.632  37.331  1.00  0.00           C  
ATOM     68  O   GLU A  18      30.582  18.477  36.444  1.00  0.00           O  
ATOM     69  N   PRO A  19      30.957  17.857  38.562  1.00  0.00           N  
ATOM     70  CA  PRO A  19      31.373  19.175  38.997  1.00  0.00           C  
ATOM     71  C   PRO A  19      32.486  19.736  38.123  1.00  0.00           C  
ATOM     72  O   PRO A  19      32.563  20.930  37.840  1.00  0.00           O  
ATOM     73  N   SER A  20      33.372  18.851  37.661  1.00  0.00           N  
ATOM     74  CA  SER A  20      34.497  19.043  36.769  1.00  0.00           C  
ATOM     75  C   SER A  20      34.371  18.419  35.387  1.00  0.00           C  
ATOM     76  O   SER A  20      35.438  18.129  34.851  1.00  0.00           O  
ATOM     77  N   ASP A  21      33.166  18.237  34.842  1.00  0.00           N  
ATOM     78  CA  ASP A  21      32.923  18.563  33.450  1.00  0.00           C  
ATOM     79  C   ASP A  21      33.415  19.975  33.166  1.00  0.00           C  
ATOM     80  O   ASP A  21      33.217  20.899  33.951  1.00  0.00           O  
ATOM     81  N   THR A  22      33.962  20.085  31.953  1.00  0.00           N  
ATOM     82  CA  THR A  22      34.056  21.381  31.312  1.00  0.00           C  
ATOM     83  C   THR A  22      32.788  21.848  30.614  1.00  0.00           C  
ATOM     84  O   THR A  22      31.943  21.039  30.238  1.00  0.00           O  
ATOM     85  N   ILE A  23      32.670  23.140  30.294  1.00  0.00           N  
ATOM     86  CA  ILE A  23      31.626  23.556  29.381  1.00  0.00           C  
ATOM     87  C   ILE A  23      31.837  22.978  27.988  1.00  0.00           C  
ATOM     88  O   ILE A  23      30.794  22.519  27.526  1.00  0.00           O  
ATOM     89  N   GLU A  24      33.009  22.681  27.423  1.00  0.00           N  
ATOM     90  CA  GLU A  24      32.984  21.919  26.190  1.00  0.00           C  
ATOM     91  C   GLU A  24      32.517  20.486  26.401  1.00  0.00           C  
ATOM     92  O   GLU A  24      31.897  19.881  25.530  1.00  0.00           O  
ATOM     93  N   ASN A  25      32.714  19.866  27.567  1.00  0.00           N  
ATOM     94  CA  ASN A  25      32.153  18.567  27.878  1.00  0.00           C  
ATOM     95  C   ASN A  25      30.642  18.654  28.037  1.00  0.00           C  
ATOM     96  O   ASN A  25      29.967  17.690  27.683  1.00  0.00           O  
ATOM     97  N   VAL A  26      30.017  19.728  28.525  1.00  0.00           N  
ATOM     98  CA  VAL A  26      28.589  19.972  28.523  1.00  0.00           C  
ATOM     99  C   VAL A  26      27.994  19.998  27.124  1.00  0.00           C  
ATOM    100  O   VAL A  26      26.993  19.332  26.867  1.00  0.00           O  
ATOM    101  N   LYS A  27      28.587  20.701  26.156  1.00  0.00           N  
ATOM    102  CA  LYS A  27      27.989  20.832  24.842  1.00  0.00           C  
ATOM    103  C   LYS A  27      27.967  19.555  24.015  1.00  0.00           C  
ATOM    104  O   LYS A  27      26.938  19.448  23.352  1.00  0.00           O  
ATOM    105  N   ALA A  28      28.968  18.676  24.112  1.00  0.00           N  
ATOM    106  CA  ALA A  28      28.799  17.452  23.355  1.00  0.00           C  
ATOM    107  C   ALA A  28      27.754  16.573  24.025  1.00  0.00           C  
ATOM    108  O   ALA A  28      27.077  15.853  23.294  1.00  0.00           O  
ATOM    109  N   LYS A  29      27.590  16.513  25.348  1.00  0.00           N  
ATOM    110  CA  LYS A  29      26.514  15.746  25.943  1.00  0.00           C  
ATOM    111  C   LYS A  29      25.099  16.198  25.611  1.00  0.00           C  
ATOM    112  O   LYS A  29      24.234  15.394  25.272  1.00  0.00           O  
ATOM    113  N   ILE A  30      24.877  17.515  25.619  1.00  0.00           N  
ATOM    114  CA  ILE A  30      23.699  18.055  24.971  1.00  0.00           C  
ATOM    115  C   ILE A  30      23.530  17.608  23.525  1.00  0.00           C  
ATOM    116  O   ILE A  30      22.409  17.232  23.194  1.00  0.00           O  
ATOM    117  N   GLN A  31      24.559  17.584  22.675  1.00  0.00           N  
ATOM    118  CA  GLN A  31      24.539  17.385  21.240  1.00  0.00           C  
ATOM    119  C   GLN A  31      24.210  15.914  21.026  1.00  0.00           C  
ATOM    120  O   GLN A  31      23.438  15.552  20.141  1.00  0.00           O  
ATOM    121  N   ASP A  32      24.519  14.995  21.944  1.00  0.00           N  
ATOM    122  CA  ASP A  32      23.952  13.670  22.099  1.00  0.00           C  
ATOM    123  C   ASP A  32      22.431  13.628  22.067  1.00  0.00           C  
ATOM    124  O   ASP A  32      21.831  12.590  21.802  1.00  0.00           O  
ATOM    125  N   LYS A  33      21.807  14.642  22.672  1.00  0.00           N  
ATOM    126  CA  LYS A  33      20.364  14.748  22.748  1.00  0.00           C  
ATOM    127  C   LYS A  33      19.611  15.517  21.671  1.00  0.00           C  
ATOM    128  O   LYS A  33      18.536  15.159  21.197  1.00  0.00           O  
ATOM    129  N   GLU A  34      20.095  16.697  21.277  1.00  0.00           N  
ATOM    130  CA  GLU A  34      19.524  17.585  20.285  1.00  0.00           C  
ATOM    131  C   GLU A  34      20.188  17.517  18.917  1.00  0.00           C  
ATOM    132  O   GLU A  34      19.489  17.737  17.931  1.00  0.00           O  
ATOM    133  N   GLY A  35      21.484  17.204  18.845  1.00  0.00           N  
ATOM    134  CA  GLY A  35      22.243  17.198  17.611  1.00  0.00           C  
ATOM    135  C   GLY A  35      22.725  18.557  17.122  1.00  0.00           C  
ATOM    136  O   GLY A  35      23.144  18.695  15.975  1.00  0.00           O  
ATOM    137  N   ILE A  36      22.679  19.641  17.899  1.00  0.00           N  
ATOM    138  CA  ILE A  36      23.136  20.997  17.667  1.00  0.00           C  
ATOM    139  C   ILE A  36      24.635  21.035  17.923  1.00  0.00           C  
ATOM    140  O   ILE A  36      25.068  20.701  19.024  1.00  0.00           O  
ATOM    141  N   PRO A  37      25.443  21.394  16.923  1.00  0.00           N  
ATOM    142  CA  PRO A  37      26.881  21.374  17.093  1.00  0.00           C  
ATOM    143  C   PRO A  37      27.298  22.458  18.077  1.00  0.00           C  
ATOM    144  O   PRO A  37      26.611  23.464  18.236  1.00  0.00           O  
ATOM    145  N   PRO A  38      28.391  22.320  18.832  1.00  0.00           N  
ATOM    146  CA  PRO A  38      28.830  23.100  19.972  1.00  0.00           C  
ATOM    147  C   PRO A  38      29.057  24.572  19.658  1.00  0.00           C  
ATOM    148  O   PRO A  38      28.665  25.381  20.495  1.00  0.00           O  
ATOM    149  N   ASP A  39      29.499  24.877  18.436  1.00  0.00           N  
ATOM    150  CA  ASP A  39      29.578  26.160  17.765  1.00  0.00           C  
ATOM    151  C   ASP A  39      28.250  26.897  17.677  1.00  0.00           C  
ATOM    152  O   ASP A  39      28.281  28.117  17.823  1.00  0.00           O  
ATOM    153  N   GLN A  40      27.110  26.221  17.516  1.00  0.00           N  
ATOM    154  CA  GLN A  40      25.789  26.747  17.239  1.00  0.00           C  
ATOM    155  C   GLN A  40      25.090  27.023  18.562  1.00  0.00           C  
ATOM    156  O   GLN A  40      24.348  27.989  18.729  1.00  0.00           O  
ATOM    157  N   GLN A  41      25.300  26.190  19.585  1.00  0.00           N  
ATOM    158  CA  GLN A  41      24.715  26.306  20.905  1.00  0.00           C  
ATOM    159  C   GLN A  41      25.362  27.441  21.688  1.00  0.00           C  
ATOM    160  O   GLN A  41      26.571  27.377  21.900  1.00  0.00           O  
ATOM    161  N   ARG A  42      24.542  28.343  22.232  1.00  0.00           N  
ATOM    162  CA  ARG A  42      24.872  29.154  23.387  1.00  0.00           C  
ATOM    163  C   ARG A  42      24.074  28.633  24.573  1.00  0.00           C  
ATOM    164  O   ARG A  42      22.859  28.566  24.397  1.00  0.00           O  
ATOM    165  N   LEU A  43      24.678  28.392  25.740  1.00  0.00           N  
ATOM    166  CA  LEU A  43      24.111  27.990  27.010  1.00  0.00           C  
ATOM    167  C   LEU A  43      24.065  29.200  27.933  1.00  0.00           C  
ATOM    168  O   LEU A  43      25.062  29.905  28.062  1.00  0.00           O  
ATOM    169  N   ILE A  44      22.880  29.397  28.514  1.00  0.00           N  
ATOM    170  CA  ILE A  44      22.554  30.511  29.381  1.00  0.00           C  
ATOM    171  C   ILE A  44      22.166  30.101  30.795  1.00  0.00           C  
ATOM    172  O   ILE A  44      21.564  29.075  31.104  1.00  0.00           O  
ATOM    173  N   PHE A  45      22.628  30.800  31.834  1.00  0.00           N  
ATOM    174  CA  PHE A  45      22.367  30.581  33.242  1.00  0.00           C  
ATOM    175  C   PHE A  45      22.560  31.864  34.039  1.00  0.00           C  
ATOM    176  O   PHE A  45      23.623  32.474  33.949  1.00  0.00           O  
ATOM    177  N   ALA A  46      21.535  32.138  34.850  1.00  0.00           N  
ATOM    178  CA  ALA A  46      21.255  33.402  35.502  1.00  0.00           C  
ATOM    179  C   ALA A  46      21.616  34.622  34.667  1.00  0.00           C  
ATOM    180  O   ALA A  46      22.003  35.681  35.154  1.00  0.00           O  
ATOM    181  N   GLY A  47      21.401  34.616  33.349  1.00  0.00           N  
ATOM    182  CA  GLY A  47      21.688  35.755  32.500  1.00  0.00           C  
ATOM    183  C   GLY A  47      23.108  35.903  31.974  1.00  0.00           C  
ATOM    184  O   GLY A  47      23.421  36.927  31.370  1.00  0.00           O  
ATOM    185  N   LYS A  48      23.954  34.912  32.268  1.00  0.00           N  
ATOM    186  CA  LYS A  48      25.208  34.673  31.585  1.00  0.00           C  
ATOM    187  C   LYS A  48      25.320  33.475  30.652  1.00  0.00           C  
ATOM    188  O   LYS A  48      24.716  32.439  30.917  1.00  0.00           O  
ATOM    189  N   GLN A  49      25.899  33.820  29.499  1.00  0.00           N  
ATOM    190  CA  GLN A  49      26.365  32.842  28.537  1.00  0.00           C  
ATOM    191  C   GLN A  49      27.640  32.145  28.991  1.00  0.00           C  
ATOM    192  O   GLN A  49      28.581  32.867  29.315  1.00  0.00           O  
ATOM    193  N   LEU A  50      27.727  30.813  28.989  1.00  0.00           N  
ATOM    194  CA  LEU A  50      28.784  29.970  29.509  1.00  0.00           C  
ATOM    195  C   LEU A  50      29.996  29.971  28.589  1.00  0.00           C  
ATOM    196  O   LEU A  50      29.826  29.583  27.434  1.00  0.00           O  
ATOM    197  N   GLU A  51      31.186  30.214  29.140  1.00  0.00           N  
ATOM    198  CA  GLU A  51      32.470  30.238  28.468  1.00  0.00           C  
ATOM    199  C   GLU A  51      33.238  28.924  28.420  1.00  0.00           C  
ATOM    200  O   GLU A  51      33.222  28.126  29.355  1.00  0.00           O  
ATOM    201  N   ASP A  52      33.894  28.663  27.286  1.00  0.00           N  
ATOM    202  CA  ASP A  52      34.015  27.296  26.826  1.00  0.00           C  
ATOM    203  C   ASP A  52      34.939  26.399  27.637  1.00  0.00           C  
ATOM    204  O   ASP A  52      34.566  25.278  27.977  1.00  0.00           O  
ATOM    205  N   GLY A  53      36.089  26.898  28.096  1.00  0.00           N  
ATOM    206  CA  GLY A  53      36.981  26.119  28.931  1.00  0.00           C  
ATOM    207  C   GLY A  53      37.004  26.459  30.415  1.00  0.00           C  
ATOM    208  O   GLY A  53      38.048  26.510  31.062  1.00  0.00           O  
ATOM    209  N   ARG A  54      35.775  26.579  30.921  1.00  0.00           N  
ATOM    210  CA  ARG A  54      35.411  26.519  32.322  1.00  0.00           C  
ATOM    211  C   ARG A  54      34.749  25.233  32.797  1.00  0.00           C  
ATOM    212  O   ARG A  54      34.315  24.406  31.999  1.00  0.00           O  
ATOM    213  N   THR A  55      34.826  25.076  34.121  1.00  0.00           N  
ATOM    214  CA  THR A  55      33.914  24.132  34.733  1.00  0.00           C  
ATOM    215  C   THR A  55      32.574  24.697  35.186  1.00  0.00           C  
ATOM    216  O   THR A  55      32.377  25.905  35.300  1.00  0.00           O  
ATOM    217  N   LEU A  56      31.629  23.763  35.306  1.00  0.00           N  
ATOM    218  CA  LEU A  56      30.413  24.072  36.030  1.00  0.00           C  
ATOM    219  C   LEU A  56      30.647  24.772  37.361  1.00  0.00           C  
ATOM    220  O   LEU A  56      29.838  25.667  37.591  1.00  0.00           O  
ATOM    221  N   SER A  57      31.677  24.416  38.134  1.00  0.00           N  
ATOM    222  CA  SER A  57      31.861  25.103  39.397  1.00  0.00           C  
ATOM    223  C   SER A  57      32.069  26.610  39.359  1.00  0.00           C  
ATOM    224  O   SER A  57      31.599  27.216  40.320  1.00  0.00           O  
ATOM    225  N   ASP A  58      32.588  27.153  38.256  1.00  0.00           N  
ATOM    226  CA  ASP A  58      32.913  28.560  38.137  1.00  0.00           C  
ATOM    227  C   ASP A  58      31.646  29.396  38.251  1.00  0.00           C  
ATOM    228  O   ASP A  58      31.752  30.607  38.430  1.00  0.00           O  
ATOM    229  N   TYR A  59      30.442  29.003  37.829  1.00  0.00           N  
ATOM    230  CA  TYR A  59      29.207  29.755  37.729  1.00  0.00           C  
ATOM    231  C   TYR A  59      28.268  29.557  38.910  1.00  0.00           C  
ATOM    232  O   TYR A  59      27.177  30.124  38.941  1.00  0.00           O  
ATOM    233  N   ASN A  60      28.619  28.761  39.922  1.00  0.00           N  
ATOM    234  CA  ASN A  60      27.757  28.283  40.985  1.00  0.00           C  
ATOM    235  C   ASN A  60      26.651  27.361  40.494  1.00  0.00           C  
ATOM    236  O   ASN A  60      25.553  27.334  41.045  1.00  0.00           O  
ATOM    237  N   ILE A  61      26.860  26.589  39.425  1.00  0.00           N  
ATOM    238  CA  ILE A  61      25.802  25.711  38.968  1.00  0.00           C  
ATOM    239  C   ILE A  61      25.813  24.553  39.955  1.00  0.00           C  
ATOM    240  O   ILE A  61      26.723  23.727  39.974  1.00  0.00           O  
ATOM    241  N   GLN A  62      24.700  24.347  40.664  1.00  0.00           N  
ATOM    242  CA  GLN A  62      24.415  23.183  41.478  1.00  0.00           C  
ATOM    243  C   GLN A  62      23.366  22.286  40.835  1.00  0.00           C  
ATOM    244  O   GLN A  62      22.711  22.547  39.828  1.00  0.00           O  
ATOM    245  N   LYS A  63      23.313  21.096  41.436  1.00  0.00           N  
ATOM    246  CA  LYS A  63      22.191  20.202  41.229  1.00  0.00           C  
ATOM    247  C   LYS A  63      20.924  20.953  40.843  1.00  0.00           C  
ATOM    248  O   LYS A  63      20.531  21.902  41.518  1.00  0.00           O  
ATOM    249  N   GLU A  64      20.199  20.431  39.851  1.00  0.00           N  
ATOM    250  CA  GLU A  64      18.892  20.835  39.371  1.00  0.00           C  
ATOM    251  C   GLU A  64      18.642  22.216  38.784  1.00  0.00           C  
ATOM    252  O   GLU A  64      17.573  22.661  38.369  1.00  0.00           O  
ATOM    253  N   SER A  65      19.741  22.956  38.620  1.00  0.00           N  
ATOM    254  CA  SER A  65      19.768  24.272  38.014  1.00  0.00           C  
ATOM    255  C   SER A  65      19.456  24.002  36.549  1.00  0.00           C  
ATOM    256  O   SER A  65      20.116  23.179  35.919  1.00  0.00           O  
ATOM    257  N   THR A  66      18.536  24.734  35.917  1.00  0.00           N  
ATOM    258  CA  THR A  66      18.138  24.812  34.526  1.00  0.00           C  
ATOM    259  C   THR A  66      18.998  25.770  33.714  1.00  0.00           C  
ATOM    260  O   THR A  66      19.084  26.960  34.007  1.00  0.00           O  
ATOM    261  N   LEU A  67      19.609  25.195  32.675  1.00  0.00           N  
ATOM    262  CA  LEU A  67      20.227  26.120  31.746  1.00  0.00           C  
ATOM    263  C   LEU A  67      19.223  26.295  30.614  1.00  0.00           C  
ATOM    264  O   LEU A  67      18.351  25.500  30.272  1.00  0.00           O  
ATOM    265  N   HIS A  68      19.382  27.405  29.889  1.00  0.00           N  
ATOM    266  CA  HIS A  68      18.717  27.577  28.613  1.00  0.00           C  
ATOM    267  C   HIS A  68      19.646  27.573  27.406  1.00  0.00           C  
ATOM    268  O   HIS A  68      20.853  27.668  27.615  1.00  0.00           O  
ATOM    269  N   LEU A  69      19.169  27.513  26.161  1.00  0.00           N  
ATOM    270  CA  LEU A  69      19.917  26.911  25.077  1.00  0.00           C  
ATOM    271  C   LEU A  69      19.460  27.698  23.857  1.00  0.00           C  
ATOM    272  O   LEU A  69      18.270  27.567  23.577  1.00  0.00           O  
ATOM    273  N   VAL A  70      20.282  28.531  23.216  1.00  0.00           N  
ATOM    274  CA  VAL A  70      19.878  29.339  22.082  1.00  0.00           C  
ATOM    275  C   VAL A  70      20.722  29.110  20.836  1.00  0.00           C  
ATOM    276  O   VAL A  70      21.938  28.938  20.796  1.00  0.00           O  
TER
ENDMDL
MODEL      17
ATOM      1  N   GLN A   2      22.157  15.985  38.439  1.00  0.00           N  
ATOM      2  CA  GLN A   2      21.376  16.263  37.251  1.00  0.00           C  
ATOM      3  C   GLN A   2      21.124  17.753  37.067  1.00  0.00           C  
ATOM      4  O   GLN A   2      20.788  18.418  38.045  1.00  0.00           O  
ATOM      5  N   ILE A   3      21.318  18.330  35.879  1.00  0.00           N  
ATOM      6  CA  ILE A   3      20.892  19.663  35.503  1.00  0.00           C  
ATOM      7  C   ILE A   3      19.809  19.547  34.440  1.00  0.00           C  
ATOM      8  O   ILE A   3      19.719  18.658  33.597  1.00  0.00           O  
ATOM      9  N   PHE A   4      18.979  20.592  34.445  1.00  0.00           N  
ATOM     10  CA  PHE A   4      17.958  20.702  33.422  1.00  0.00           C  
ATOM     11  C   PHE A   4      18.361  21.770  32.416  1.00  0.00           C  
ATOM     12  O   PHE A   4      18.499  22.953  32.722  1.00  0.00           O  
ATOM     13  N   VAL A   5      18.495  21.344  31.158  1.00  0.00           N  
ATOM     14  CA  VAL A   5      18.626  22.195  29.992  1.00  0.00           C  
ATOM     15  C   VAL A   5      17.275  22.443  29.336  1.00  0.00           C  
ATOM     16  O   VAL A   5      16.735  21.459  28.834  1.00  0.00           O  
ATOM     17  N   LYS A   6      16.678  23.636  29.282  1.00  0.00           N  
ATOM     18  CA  LYS A   6      15.425  23.907  28.607  1.00  0.00           C  
ATOM     19  C   LYS A   6      15.683  24.612  27.284  1.00  0.00           C  
ATOM     20  O   LYS A   6      16.624  25.403  27.294  1.00  0.00           O  
ATOM     21  N   THR A   7      14.845  24.373  26.273  1.00  0.00           N  
ATOM     22  CA  THR A   7      15.213  24.942  24.991  1.00  0.00           C  
ATOM     23  C   THR A   7      14.418  26.179  24.599  1.00  0.00           C  
ATOM     24  O   THR A   7      13.488  26.688  25.221  1.00  0.00           O  
ATOM     25  N   LEU A   8      14.900  26.846  23.547  1.00  0.00           N  
ATOM     26  CA  LEU A   8      14.064  27.845  22.914  1.00  0.00           C  
ATOM     27  C   LEU A   8      12.660  27.428  22.500  1.00  0.00           C  
ATOM     28  O   LEU A   8      11.914  28.271  22.009  1.00  0.00           O  
ATOM     29  N   THR A   9      12.310  26.140  22.551  1.00  0.00           N  
ATOM     30  CA  THR A   9      11.274  25.439  21.819  1.00  0.00           C  
ATOM     31  C   THR A   9      10.302  24.673  22.703  1.00  0.00           C  
ATOM     32  O   THR A   9       9.532  23.939  22.086  1.00  0.00           O  
ATOM     33  N   GLY A  10      10.277  24.728  24.036  1.00  0.00           N  
ATOM     34  CA  GLY A  10       9.142  24.318  24.839  1.00  0.00           C  
ATOM     35  C   GLY A  10       9.353  22.979  25.530  1.00  0.00           C  
ATOM     36  O   GLY A  10       8.919  22.872  26.676  1.00  0.00           O  
ATOM     37  N   LYS A  11      10.226  22.110  25.017  1.00  0.00           N  
ATOM     38  CA  LYS A  11      10.671  20.918  25.711  1.00  0.00           C  
ATOM     39  C   LYS A  11      11.637  21.318  26.817  1.00  0.00           C  
ATOM     40  O   LYS A  11      12.439  22.226  26.615  1.00  0.00           O  
ATOM     41  N   THR A  12      11.835  20.357  27.722  1.00  0.00           N  
ATOM     42  CA  THR A  12      12.921  20.263  28.678  1.00  0.00           C  
ATOM     43  C   THR A  12      13.845  19.075  28.446  1.00  0.00           C  
ATOM     44  O   THR A  12      13.291  18.116  27.914  1.00  0.00           O  
ATOM     45  N   ILE A  13      15.119  18.983  28.835  1.00  0.00           N  
ATOM     46  CA  ILE A  13      16.063  17.899  28.659  1.00  0.00           C  
ATOM     47  C   ILE A  13      16.764  17.658  29.988  1.00  0.00           C  
ATOM     48  O   ILE A  13      17.209  18.617  30.615  1.00  0.00           O  
ATOM     49  N   THR A  14      16.791  16.394  30.417  1.00  0.00           N  
ATOM     50  CA  THR A  14      17.557  16.065  31.603  1.00  0.00           C  
ATOM     51  C   THR A  14      18.925  15.542  31.190  1.00  0.00           C  
ATOM     52  O   THR A  14      19.073  14.712  30.296  1.00  0.00           O  
ATOM     53  N   LEU A  15      19.935  16.080  31.878  1.00  0.00           N  
ATOM     54  CA  LEU A  15      21.354  15.925  31.623  1.00  0.00           C  
ATOM     55  C   LEU A  15      22.086  15.607  32.919  1.00  0.00           C  
ATOM     56  O   LEU A  15      21.890  16.199  33.978  1.00  0.00           O  
ATOM     57  N   GLU A  16      22.921  14.574  32.785  1.00  0.00           N  
ATOM     58  CA  GLU A  16      23.675  14.110  33.932  1.00  0.00           C  
ATOM     59  C   GLU A  16      25.051  14.729  33.731  1.00  0.00           C  
ATOM     60  O   GLU A  16      25.677  14.632  32.679  1.00  0.00           O  
ATOM     61  N   VAL A  17      25.485  15.523  34.713  1.00  0.00           N  
ATOM     62  CA  VAL A  17      26.758  16.201  34.856  1.00  0.00           C  
ATOM     63  C   VAL A  17      27.452  16.032  36.200  1.00  0.00           C  
ATOM     64  O   VAL A  17      26.811  15.688  37.190  1.00  0.00           O  
ATOM     65  N   GLU A  18      28.732  16.410  36.249  1.00  0.00           N  
ATOM     66  CA  GLU A  18      29.495  16.347  37.479  1.00  0.00           C  
ATOM     67  C   GLU A  18      30.118  17.724  37.651  1.00  0.00           C  
ATOM     68  O   GLU A  18      30.250  18.420  36.646  1.00  0.00           O  
ATOM     69  N   PRO A  19      30.447  18.191  38.858  1.00  0.00           N  
ATOM     70  CA  PRO A  19      30.971  19.527  39.047  1.00  0.00           C  
ATOM     71  C   PRO A  19      32.256  19.784  38.271  1.00  0.00           C  
ATOM     72  O   PRO A  19      32.543  20.932  37.939  1.00  0.00           O  
ATOM     73  N   SER A  20      32.988  18.739  37.878  1.00  0.00           N  
ATOM     74  CA  SER A  20      34.099  18.747  36.948  1.00  0.00           C  
ATOM     75  C   SER A  20      33.815  19.245  35.538  1.00  0.00           C  
ATOM     76  O   SER A  20      34.847  19.484  34.915  1.00  0.00           O  
ATOM     77  N   ASP A  21      32.650  19.116  34.900  1.00  0.00           N  
ATOM     78  CA  ASP A  21      32.583  19.216  33.456  1.00  0.00           C  
ATOM     79  C   ASP A  21      32.823  20.638  32.969  1.00  0.00           C  
ATOM     80  O   ASP A  21      32.383  21.574  33.634  1.00  0.00           O  
ATOM     81  N   THR A  22      33.401  20.813  31.778  1.00  0.00           N  
ATOM     82  CA  THR A  22      33.559  22.021  30.994  1.00  0.00           C  
ATOM     83  C   THR A  22      32.254  22.298  30.261  1.00  0.00           C  
ATOM     84  O   THR A  22      31.508  21.384  29.916  1.00  0.00           O  
ATOM     85  N   ILE A  23      31.921  23.572  30.039  1.00  0.00           N  
ATOM     86  CA  ILE A  23      30.861  23.959  29.130  1.00  0.00           C  
ATOM     87  C   ILE A  23      30.889  23.138  27.849  1.00  0.00           C  
ATOM     88  O   ILE A  23      29.820  22.652  27.485  1.00  0.00           O  
ATOM     89  N   GLU A  24      32.069  22.861  27.290  1.00  0.00           N  
ATOM     90  CA  GLU A  24      32.187  22.063  26.087  1.00  0.00           C  
ATOM     91  C   GLU A  24      31.780  20.607  26.269  1.00  0.00           C  
ATOM     92  O   GLU A  24      31.084  20.056  25.420  1.00  0.00           O  
ATOM     93  N   ASN A  25      31.979  19.973  27.428  1.00  0.00           N  
ATOM     94  CA  ASN A  25      31.556  18.632  27.780  1.00  0.00           C  
ATOM     95  C   ASN A  25      30.049  18.663  27.991  1.00  0.00           C  
ATOM     96  O   ASN A  25      29.502  17.587  27.764  1.00  0.00           O  
ATOM     97  N   VAL A  26      29.441  19.717  28.540  1.00  0.00           N  
ATOM     98  CA  VAL A  26      28.003  19.885  28.490  1.00  0.00           C  
ATOM     99  C   VAL A  26      27.453  19.714  27.080  1.00  0.00           C  
ATOM    100  O   VAL A  26      26.651  18.820  26.829  1.00  0.00           O  
ATOM    101  N   LYS A  27      27.969  20.471  26.109  1.00  0.00           N  
ATOM    102  CA  LYS A  27      27.570  20.563  24.719  1.00  0.00           C  
ATOM    103  C   LYS A  27      27.746  19.285  23.912  1.00  0.00           C  
ATOM    104  O   LYS A  27      26.849  19.031  23.111  1.00  0.00           O  
ATOM    105  N   ALA A  28      28.812  18.505  24.111  1.00  0.00           N  
ATOM    106  CA  ALA A  28      28.834  17.179  23.528  1.00  0.00           C  
ATOM    107  C   ALA A  28      27.683  16.250  23.888  1.00  0.00           C  
ATOM    108  O   ALA A  28      27.067  15.657  23.005  1.00  0.00           O  
ATOM    109  N   LYS A  29      27.203  16.181  25.132  1.00  0.00           N  
ATOM    110  CA  LYS A  29      26.081  15.384  25.583  1.00  0.00           C  
ATOM    111  C   LYS A  29      24.740  15.802  24.996  1.00  0.00           C  
ATOM    112  O   LYS A  29      23.882  14.996  24.642  1.00  0.00           O  
ATOM    113  N   ILE A  30      24.451  17.105  24.969  1.00  0.00           N  
ATOM    114  CA  ILE A  30      23.340  17.626  24.201  1.00  0.00           C  
ATOM    115  C   ILE A  30      23.434  17.319  22.713  1.00  0.00           C  
ATOM    116  O   ILE A  30      22.466  16.917  22.071  1.00  0.00           O  
ATOM    117  N   GLN A  31      24.598  17.386  22.062  1.00  0.00           N  
ATOM    118  CA  GLN A  31      24.755  17.181  20.636  1.00  0.00           C  
ATOM    119  C   GLN A  31      24.388  15.739  20.319  1.00  0.00           C  
ATOM    120  O   GLN A  31      23.537  15.528  19.456  1.00  0.00           O  
ATOM    121  N   ASP A  32      24.962  14.827  21.106  1.00  0.00           N  
ATOM    122  CA  ASP A  32      24.753  13.394  21.053  1.00  0.00           C  
ATOM    123  C   ASP A  32      23.286  12.993  21.129  1.00  0.00           C  
ATOM    124  O   ASP A  32      22.905  12.164  20.307  1.00  0.00           O  
ATOM    125  N   LYS A  33      22.543  13.648  22.025  1.00  0.00           N  
ATOM    126  CA  LYS A  33      21.146  13.267  22.076  1.00  0.00           C  
ATOM    127  C   LYS A  33      20.393  13.922  20.928  1.00  0.00           C  
ATOM    128  O   LYS A  33      19.383  13.342  20.536  1.00  0.00           O  
ATOM    129  N   GLU A  34      20.686  15.119  20.414  1.00  0.00           N  
ATOM    130  CA  GLU A  34      19.777  16.007  19.718  1.00  0.00           C  
ATOM    131  C   GLU A  34      20.241  16.615  18.404  1.00  0.00           C  
ATOM    132  O   GLU A  34      19.471  17.325  17.759  1.00  0.00           O  
ATOM    133  N   GLY A  35      21.464  16.235  18.028  1.00  0.00           N  
ATOM    134  CA  GLY A  35      22.191  16.606  16.831  1.00  0.00           C  
ATOM    135  C   GLY A  35      22.751  18.016  16.710  1.00  0.00           C  
ATOM    136  O   GLY A  35      22.850  18.392  15.544  1.00  0.00           O  
ATOM    137  N   ILE A  36      22.976  18.883  17.700  1.00  0.00           N  
ATOM    138  CA  ILE A  36      23.215  20.310  17.625  1.00  0.00           C  
ATOM    139  C   ILE A  36      24.668  20.519  18.025  1.00  0.00           C  
ATOM    140  O   ILE A  36      25.079  20.491  19.183  1.00  0.00           O  
ATOM    141  N   PRO A  37      25.560  20.921  17.117  1.00  0.00           N  
ATOM    142  CA  PRO A  37      26.980  21.028  17.387  1.00  0.00           C  
ATOM    143  C   PRO A  37      27.436  22.166  18.289  1.00  0.00           C  
ATOM    144  O   PRO A  37      26.667  23.084  18.566  1.00  0.00           O  
ATOM    145  N   PRO A  38      28.597  22.040  18.937  1.00  0.00           N  
ATOM    146  CA  PRO A  38      28.999  22.914  20.021  1.00  0.00           C  
ATOM    147  C   PRO A  38      29.138  24.358  19.562  1.00  0.00           C  
ATOM    148  O   PRO A  38      28.757  25.215  20.357  1.00  0.00           O  
ATOM    149  N   ASP A  39      29.519  24.637  18.314  1.00  0.00           N  
ATOM    150  CA  ASP A  39      29.693  25.951  17.726  1.00  0.00           C  
ATOM    151  C   ASP A  39      28.367  26.696  17.731  1.00  0.00           C  
ATOM    152  O   ASP A  39      28.394  27.909  17.530  1.00  0.00           O  
ATOM    153  N   GLN A  40      27.244  25.986  17.854  1.00  0.00           N  
ATOM    154  CA  GLN A  40      25.891  26.485  17.706  1.00  0.00           C  
ATOM    155  C   GLN A  40      25.280  26.586  19.097  1.00  0.00           C  
ATOM    156  O   GLN A  40      24.460  27.499  19.155  1.00  0.00           O  
ATOM    157  N   GLN A  41      25.599  25.760  20.096  1.00  0.00           N  
ATOM    158  CA  GLN A  41      25.065  25.972  21.427  1.00  0.00           C  
ATOM    159  C   GLN A  41      25.573  27.152  22.243  1.00  0.00           C  
ATOM    160  O   GLN A  41      26.774  27.254  22.489  1.00  0.00           O  
ATOM    161  N   ARG A  42      24.651  27.886  22.869  1.00  0.00           N  
ATOM    162  CA  ARG A  42      24.859  28.908  23.875  1.00  0.00           C  
ATOM    163  C   ARG A  42      24.022  28.460  25.064  1.00  0.00           C  
ATOM    164  O   ARG A  42      22.815  28.351  24.863  1.00  0.00           O  
ATOM    165  N   LEU A  43      24.709  28.367  26.206  1.00  0.00           N  
ATOM    166  CA  LEU A  43      24.102  28.235  27.514  1.00  0.00           C  
ATOM    167  C   LEU A  43      24.063  29.508  28.348  1.00  0.00           C  
ATOM    168  O   LEU A  43      25.057  30.209  28.526  1.00  0.00           O  
ATOM    169  N   ILE A  44      22.811  29.856  28.653  1.00  0.00           N  
ATOM    170  CA  ILE A  44      22.485  31.025  29.446  1.00  0.00           C  
ATOM    171  C   ILE A  44      21.822  30.550  30.731  1.00  0.00           C  
ATOM    172  O   ILE A  44      20.901  29.738  30.707  1.00  0.00           O  
ATOM    173  N   PHE A  45      22.406  30.859  31.891  1.00  0.00           N  
ATOM    174  CA  PHE A  45      21.976  30.594  33.250  1.00  0.00           C  
ATOM    175  C   PHE A  45      21.182  31.630  34.032  1.00  0.00           C  
ATOM    176  O   PHE A  45      20.083  31.306  34.477  1.00  0.00           O  
ATOM    177  N   ALA A  46      21.779  32.817  34.169  1.00  0.00           N  
ATOM    178  CA  ALA A  46      21.229  33.855  35.017  1.00  0.00           C  
ATOM    179  C   ALA A  46      21.177  35.009  34.026  1.00  0.00           C  
ATOM    180  O   ALA A  46      20.594  34.745  32.977  1.00  0.00           O  
ATOM    181  N   GLY A  47      21.711  36.227  34.135  1.00  0.00           N  
ATOM    182  CA  GLY A  47      21.589  37.189  33.058  1.00  0.00           C  
ATOM    183  C   GLY A  47      22.516  36.862  31.896  1.00  0.00           C  
ATOM    184  O   GLY A  47      22.926  37.804  31.223  1.00  0.00           O  
ATOM    185  N   LYS A  48      23.291  35.785  32.043  1.00  0.00           N  
ATOM    186  CA  LYS A  48      24.673  35.562  31.667  1.00  0.00           C  
ATOM    187  C   LYS A  48      24.941  34.245  30.952  1.00  0.00           C  
ATOM    188  O   LYS A  48      24.364  33.259  31.405  1.00  0.00           O  
ATOM    189  N   GLN A  49      25.527  34.329  29.755  1.00  0.00           N  
ATOM    190  CA  GLN A  49      25.963  33.194  28.968  1.00  0.00           C  
ATOM    191  C   GLN A  49      27.311  32.677  29.450  1.00  0.00           C  
ATOM    192  O   GLN A  49      28.197  33.469  29.763  1.00  0.00           O  
ATOM    193  N   LEU A  50      27.340  31.347  29.563  1.00  0.00           N  
ATOM    194  CA  LEU A  50      28.324  30.446  30.129  1.00  0.00           C  
ATOM    195  C   LEU A  50      29.268  30.064  28.997  1.00  0.00           C  
ATOM    196  O   LEU A  50      28.741  29.207  28.293  1.00  0.00           O  
ATOM    197  N   GLU A  51      30.446  30.628  28.717  1.00  0.00           N  
ATOM    198  CA  GLU A  51      31.262  30.268  27.575  1.00  0.00           C  
ATOM    199  C   GLU A  51      32.534  29.516  27.938  1.00  0.00           C  
ATOM    200  O   GLU A  51      32.748  29.159  29.095  1.00  0.00           O  
ATOM    201  N   ASP A  52      33.409  29.272  26.961  1.00  0.00           N  
ATOM    202  CA  ASP A  52      33.588  27.840  26.826  1.00  0.00           C  
ATOM    203  C   ASP A  52      34.641  27.134  27.670  1.00  0.00           C  
ATOM    204  O   ASP A  52      34.491  26.037  28.203  1.00  0.00           O  
ATOM    205  N   GLY A  53      35.748  27.792  28.020  1.00  0.00           N  
ATOM    206  CA  GLY A  53      36.838  27.232  28.792  1.00  0.00           C  
ATOM    207  C   GLY A  53      36.820  27.037  30.302  1.00  0.00           C  
ATOM    208  O   GLY A  53      37.764  27.301  31.043  1.00  0.00           O  
ATOM    209  N   ARG A  54      35.611  26.776  30.804  1.00  0.00           N  
ATOM    210  CA  ARG A  54      35.295  26.895  32.212  1.00  0.00           C  
ATOM    211  C   ARG A  54      34.322  25.780  32.566  1.00  0.00           C  
ATOM    212  O   ARG A  54      33.546  25.276  31.757  1.00  0.00           O  
ATOM    213  N   THR A  55      34.482  25.459  33.853  1.00  0.00           N  
ATOM    214  CA  THR A  55      33.767  24.389  34.518  1.00  0.00           C  
ATOM    215  C   THR A  55      32.433  24.773  35.141  1.00  0.00           C  
ATOM    216  O   THR A  55      32.179  25.945  35.408  1.00  0.00           O  
ATOM    217  N   LEU A  56      31.681  23.759  35.578  1.00  0.00           N  
ATOM    218  CA  LEU A  56      30.507  23.974  36.401  1.00  0.00           C  
ATOM    219  C   LEU A  56      30.810  24.599  37.756  1.00  0.00           C  
ATOM    220  O   LEU A  56      30.050  25.481  38.147  1.00  0.00           O  
ATOM    221  N   SER A  57      31.744  24.126  38.583  1.00  0.00           N  
ATOM    222  CA  SER A  57      32.344  24.762  39.738  1.00  0.00           C  
ATOM    223  C   SER A  57      32.729  26.206  39.448  1.00  0.00           C  
ATOM    224  O   SER A  57      32.435  27.001  40.338  1.00  0.00           O  
ATOM    225  N   ASP A  58      33.223  26.703  38.313  1.00  0.00           N  
ATOM    226  CA  ASP A  58      33.615  28.088  38.138  1.00  0.00           C  
ATOM    227  C   ASP A  58      32.358  28.942  38.060  1.00  0.00           C  
ATOM    228  O   ASP A  58      32.490  30.162  38.127  1.00  0.00           O  
ATOM    229  N   TYR A  59      31.223  28.369  37.652  1.00  0.00           N  
ATOM    230  CA  TYR A  59      29.988  29.106  37.468  1.00  0.00           C  
ATOM    231  C   TYR A  59      29.022  28.816  38.607  1.00  0.00           C  
ATOM    232  O   TYR A  59      27.843  29.157  38.546  1.00  0.00           O  
ATOM    233  N   ASN A  60      29.465  28.114  39.652  1.00  0.00           N  
ATOM    234  CA  ASN A  60      28.595  27.772  40.760  1.00  0.00           C  
ATOM    235  C   ASN A  60      27.393  26.934  40.350  1.00  0.00           C  
ATOM    236  O   ASN A  60      26.346  27.072  40.977  1.00  0.00           O  
ATOM    237  N   ILE A  61      27.522  26.064  39.345  1.00  0.00           N  
ATOM    238  CA  ILE A  61      26.470  25.126  39.005  1.00  0.00           C  
ATOM    239  C   ILE A  61      26.479  23.950  39.970  1.00  0.00           C  
ATOM    240  O   ILE A  61      27.462  23.261  40.235  1.00  0.00           O  
ATOM    241  N   GLN A  62      25.344  23.807  40.657  1.00  0.00           N  
ATOM    242  CA  GLN A  62      25.020  22.778  41.625  1.00  0.00           C  
ATOM    243  C   GLN A  62      23.849  21.862  41.300  1.00  0.00           C  
ATOM    244  O   GLN A  62      23.149  22.184  40.342  1.00  0.00           O  
ATOM    245  N   LYS A  63      23.658  20.711  41.950  1.00  0.00           N  
ATOM    246  CA  LYS A  63      22.484  19.863  41.926  1.00  0.00           C  
ATOM    247  C   LYS A  63      21.237  20.715  41.740  1.00  0.00           C  
ATOM    248  O   LYS A  63      20.699  21.422  42.590  1.00  0.00           O  
ATOM    249  N   GLU A  64      20.640  20.412  40.584  1.00  0.00           N  
ATOM    250  CA  GLU A  64      19.366  20.917  40.117  1.00  0.00           C  
ATOM    251  C   GLU A  64      19.304  22.416  39.860  1.00  0.00           C  
ATOM    252  O   GLU A  64      18.354  23.133  40.167  1.00  0.00           O  
ATOM    253  N   SER A  65      20.399  22.963  39.327  1.00  0.00           N  
ATOM    254  CA  SER A  65      20.435  24.175  38.534  1.00  0.00           C  
ATOM    255  C   SER A  65      19.785  23.930  37.178  1.00  0.00           C  
ATOM    256  O   SER A  65      19.944  22.831  36.651  1.00  0.00           O  
ATOM    257  N   THR A  66      19.593  25.006  36.411  1.00  0.00           N  
ATOM    258  CA  THR A  66      19.016  24.887  35.088  1.00  0.00           C  
ATOM    259  C   THR A  66      19.486  25.955  34.112  1.00  0.00           C  
ATOM    260  O   THR A  66      19.454  27.160  34.348  1.00  0.00           O  
ATOM    261  N   LEU A  67      19.947  25.422  32.977  1.00  0.00           N  
ATOM    262  CA  LEU A  67      20.520  26.315  31.990  1.00  0.00           C  
ATOM    263  C   LEU A  67      19.513  26.321  30.849  1.00  0.00           C  
ATOM    264  O   LEU A  67      18.744  25.421  30.518  1.00  0.00           O  
ATOM    265  N   HIS A  68      19.498  27.464  30.159  1.00  0.00           N  
ATOM    266  CA  HIS A  68      18.765  27.753  28.944  1.00  0.00           C  
ATOM    267  C   HIS A  68      19.588  27.606  27.672  1.00  0.00           C  
ATOM    268  O   HIS A  68      20.769  27.917  27.799  1.00  0.00           O  
ATOM    269  N   LEU A  69      18.993  27.183  26.555  1.00  0.00           N  
ATOM    270  CA  LEU A  69      19.627  26.869  25.291  1.00  0.00           C  
ATOM    271  C   LEU A  69      19.093  27.720  24.146  1.00  0.00           C  
ATOM    272  O   LEU A  69      17.884  27.693  23.928  1.00  0.00           O  
ATOM    273  N   VAL A  70      19.981  28.459  23.476  1.00  0.00           N  
ATOM    274  CA  VAL A  70      19.454  29.066  22.271  1.00  0.00           C  
ATOM    275  C   VAL A  70      20.285  28.601  21.084  1.00  0.00           C  
ATOM    276  O   VAL A  70      21.192  27.774  21.148  1.00  0.00           O  
TER
ENDMDL
MODEL      18
ATOM      1  N   GLN A   2      22.984  15.474  38.185  1.00  0.00           N  
ATOM      2  CA  GLN A   2      22.325  15.948  36.986  1.00  0.00           C  
ATOM      3  C   GLN A   2      22.052  17.444  36.918  1.00  0.00           C  
ATOM      4  O   GLN A   2      21.775  18.031  37.961  1.00  0.00           O  
ATOM      5  N   ILE A   3      22.064  18.015  35.712  1.00  0.00           N  
ATOM      6  CA  ILE A   3      21.500  19.306  35.368  1.00  0.00           C  
ATOM      7  C   ILE A   3      20.337  19.171  34.396  1.00  0.00           C  
ATOM      8  O   ILE A   3      20.219  18.270  33.568  1.00  0.00           O  
ATOM      9  N   PHE A   4      19.572  20.262  34.302  1.00  0.00           N  
ATOM     10  CA  PHE A   4      18.696  20.424  33.160  1.00  0.00           C  
ATOM     11  C   PHE A   4      19.056  21.511  32.158  1.00  0.00           C  
ATOM     12  O   PHE A   4      19.594  22.554  32.522  1.00  0.00           O  
ATOM     13  N   VAL A   5      18.613  21.295  30.916  1.00  0.00           N  
ATOM     14  CA  VAL A   5      18.600  22.269  29.843  1.00  0.00           C  
ATOM     15  C   VAL A   5      17.217  22.570  29.283  1.00  0.00           C  
ATOM     16  O   VAL A   5      16.516  21.677  28.812  1.00  0.00           O  
ATOM     17  N   LYS A   6      16.703  23.802  29.265  1.00  0.00           N  
ATOM     18  CA  LYS A   6      15.519  24.293  28.589  1.00  0.00           C  
ATOM     19  C   LYS A   6      15.860  24.997  27.283  1.00  0.00           C  
ATOM     20  O   LYS A   6      16.473  26.051  27.134  1.00  0.00           O  
ATOM     21  N   THR A   7      15.083  24.495  26.320  1.00  0.00           N  
ATOM     22  CA  THR A   7      15.119  24.771  24.897  1.00  0.00           C  
ATOM     23  C   THR A   7      14.140  25.874  24.519  1.00  0.00           C  
ATOM     24  O   THR A   7      13.189  26.139  25.250  1.00  0.00           O  
ATOM     25  N   LEU A   8      14.306  26.550  23.379  1.00  0.00           N  
ATOM     26  CA  LEU A   8      13.571  27.767  23.099  1.00  0.00           C  
ATOM     27  C   LEU A   8      12.059  27.590  23.087  1.00  0.00           C  
ATOM     28  O   LEU A   8      11.379  28.571  23.383  1.00  0.00           O  
ATOM     29  N   THR A   9      11.464  26.448  22.735  1.00  0.00           N  
ATOM     30  CA  THR A   9      10.049  26.138  22.681  1.00  0.00           C  
ATOM     31  C   THR A   9       9.341  25.635  23.930  1.00  0.00           C  
ATOM     32  O   THR A   9       8.131  25.773  24.098  1.00  0.00           O  
ATOM     33  N   GLY A  10      10.099  25.075  24.877  1.00  0.00           N  
ATOM     34  CA  GLY A  10       9.682  24.559  26.164  1.00  0.00           C  
ATOM     35  C   GLY A  10      10.025  23.114  26.497  1.00  0.00           C  
ATOM     36  O   GLY A  10       9.601  22.640  27.549  1.00  0.00           O  
ATOM     37  N   LYS A  11      10.743  22.445  25.592  1.00  0.00           N  
ATOM     38  CA  LYS A  11      11.306  21.143  25.888  1.00  0.00           C  
ATOM     39  C   LYS A  11      12.541  21.344  26.754  1.00  0.00           C  
ATOM     40  O   LYS A  11      13.268  22.332  26.681  1.00  0.00           O  
ATOM     41  N   THR A  12      12.546  20.565  27.837  1.00  0.00           N  
ATOM     42  CA  THR A  12      13.466  20.426  28.949  1.00  0.00           C  
ATOM     43  C   THR A  12      14.071  19.030  28.932  1.00  0.00           C  
ATOM     44  O   THR A  12      13.283  18.090  28.999  1.00  0.00           O  
ATOM     45  N   ILE A  13      15.395  18.851  28.962  1.00  0.00           N  
ATOM     46  CA  ILE A  13      15.941  17.526  28.755  1.00  0.00           C  
ATOM     47  C   ILE A  13      16.900  17.118  29.864  1.00  0.00           C  
ATOM     48  O   ILE A  13      17.633  18.000  30.306  1.00  0.00           O  
ATOM     49  N   THR A  14      17.114  15.860  30.256  1.00  0.00           N  
ATOM     50  CA  THR A  14      18.048  15.588  31.331  1.00  0.00           C  
ATOM     51  C   THR A  14      19.417  15.272  30.747  1.00  0.00           C  
ATOM     52  O   THR A  14      19.549  14.401  29.889  1.00  0.00           O  
ATOM     53  N   LEU A  15      20.368  15.908  31.434  1.00  0.00           N  
ATOM     54  CA  LEU A  15      21.810  15.764  31.414  1.00  0.00           C  
ATOM     55  C   LEU A  15      22.470  15.298  32.705  1.00  0.00           C  
ATOM     56  O   LEU A  15      22.230  15.829  33.787  1.00  0.00           O  
ATOM     57  N   GLU A  16      23.396  14.347  32.559  1.00  0.00           N  
ATOM     58  CA  GLU A  16      24.057  13.827  33.738  1.00  0.00           C  
ATOM     59  C   GLU A  16      25.525  14.209  33.599  1.00  0.00           C  
ATOM     60  O   GLU A  16      26.345  13.867  32.750  1.00  0.00           O  
ATOM     61  N   VAL A  17      25.867  15.026  34.598  1.00  0.00           N  
ATOM     62  CA  VAL A  17      27.127  15.711  34.804  1.00  0.00           C  
ATOM     63  C   VAL A  17      27.645  15.798  36.233  1.00  0.00           C  
ATOM     64  O   VAL A  17      26.902  15.415  37.134  1.00  0.00           O  
ATOM     65  N   GLU A  18      28.937  16.082  36.411  1.00  0.00           N  
ATOM     66  CA  GLU A  18      29.500  16.319  37.724  1.00  0.00           C  
ATOM     67  C   GLU A  18      30.385  17.546  37.902  1.00  0.00           C  
ATOM     68  O   GLU A  18      30.813  18.043  36.863  1.00  0.00           O  
ATOM     69  N   PRO A  19      30.673  18.178  39.041  1.00  0.00           N  
ATOM     70  CA  PRO A  19      31.209  19.517  39.184  1.00  0.00           C  
ATOM     71  C   PRO A  19      32.460  19.849  38.383  1.00  0.00           C  
ATOM     72  O   PRO A  19      32.716  21.037  38.195  1.00  0.00           O  
ATOM     73  N   SER A  20      33.255  18.847  38.001  1.00  0.00           N  
ATOM     74  CA  SER A  20      34.414  19.098  37.168  1.00  0.00           C  
ATOM     75  C   SER A  20      34.177  19.153  35.666  1.00  0.00           C  
ATOM     76  O   SER A  20      35.192  19.322  34.994  1.00  0.00           O  
ATOM     77  N   ASP A  21      32.974  18.931  35.130  1.00  0.00           N  
ATOM     78  CA  ASP A  21      32.629  19.000  33.724  1.00  0.00           C  
ATOM     79  C   ASP A  21      32.790  20.450  33.288  1.00  0.00           C  
ATOM     80  O   ASP A  21      32.302  21.371  33.939  1.00  0.00           O  
ATOM     81  N   THR A  22      33.531  20.701  32.207  1.00  0.00           N  
ATOM     82  CA  THR A  22      33.464  21.916  31.420  1.00  0.00           C  
ATOM     83  C   THR A  22      32.131  22.147  30.725  1.00  0.00           C  
ATOM     84  O   THR A  22      31.445  21.218  30.305  1.00  0.00           O  
ATOM     85  N   ILE A  23      31.795  23.417  30.487  1.00  0.00           N  
ATOM     86  CA  ILE A  23      30.754  23.760  29.539  1.00  0.00           C  
ATOM     87  C   ILE A  23      30.902  23.112  28.169  1.00  0.00           C  
ATOM     88  O   ILE A  23      29.913  22.691  27.574  1.00  0.00           O  
ATOM     89  N   GLU A  24      32.104  22.773  27.699  1.00  0.00           N  
ATOM     90  CA  GLU A  24      32.300  22.085  26.439  1.00  0.00           C  
ATOM     91  C   GLU A  24      31.809  20.650  26.569  1.00  0.00           C  
ATOM     92  O   GLU A  24      31.160  20.086  25.692  1.00  0.00           O  
ATOM     93  N   ASN A  25      32.152  20.013  27.691  1.00  0.00           N  
ATOM     94  CA  ASN A  25      31.657  18.699  28.048  1.00  0.00           C  
ATOM     95  C   ASN A  25      30.168  18.621  28.355  1.00  0.00           C  
ATOM     96  O   ASN A  25      29.655  17.513  28.209  1.00  0.00           O  
ATOM     97  N   VAL A  26      29.418  19.645  28.765  1.00  0.00           N  
ATOM     98  CA  VAL A  26      27.989  19.685  28.526  1.00  0.00           C  
ATOM     99  C   VAL A  26      27.575  19.718  27.061  1.00  0.00           C  
ATOM    100  O   VAL A  26      26.800  18.890  26.588  1.00  0.00           O  
ATOM    101  N   LYS A  27      28.137  20.647  26.284  1.00  0.00           N  
ATOM    102  CA  LYS A  27      27.827  20.872  24.887  1.00  0.00           C  
ATOM    103  C   LYS A  27      28.053  19.608  24.069  1.00  0.00           C  
ATOM    104  O   LYS A  27      27.214  19.324  23.218  1.00  0.00           O  
ATOM    105  N   ALA A  28      29.007  18.727  24.378  1.00  0.00           N  
ATOM    106  CA  ALA A  28      28.979  17.460  23.675  1.00  0.00           C  
ATOM    107  C   ALA A  28      27.885  16.482  24.076  1.00  0.00           C  
ATOM    108  O   ALA A  28      27.616  15.564  23.305  1.00  0.00           O  
ATOM    109  N   LYS A  29      27.335  16.566  25.290  1.00  0.00           N  
ATOM    110  CA  LYS A  29      26.217  15.767  25.749  1.00  0.00           C  
ATOM    111  C   LYS A  29      24.865  16.289  25.285  1.00  0.00           C  
ATOM    112  O   LYS A  29      23.938  15.507  25.092  1.00  0.00           O  
ATOM    113  N   ILE A  30      24.699  17.610  25.190  1.00  0.00           N  
ATOM    114  CA  ILE A  30      23.647  18.227  24.409  1.00  0.00           C  
ATOM    115  C   ILE A  30      23.464  17.689  22.997  1.00  0.00           C  
ATOM    116  O   ILE A  30      22.359  17.431  22.524  1.00  0.00           O  
ATOM    117  N   GLN A  31      24.590  17.485  22.309  1.00  0.00           N  
ATOM    118  CA  GLN A  31      24.743  16.940  20.976  1.00  0.00           C  
ATOM    119  C   GLN A  31      24.226  15.508  20.995  1.00  0.00           C  
ATOM    120  O   GLN A  31      23.473  15.111  20.107  1.00  0.00           O  
ATOM    121  N   ASP A  32      24.502  14.723  22.038  1.00  0.00           N  
ATOM    122  CA  ASP A  32      24.015  13.369  22.215  1.00  0.00           C  
ATOM    123  C   ASP A  32      22.527  13.264  22.515  1.00  0.00           C  
ATOM    124  O   ASP A  32      21.977  12.335  21.925  1.00  0.00           O  
ATOM    125  N   LYS A  33      21.907  14.283  23.115  1.00  0.00           N  
ATOM    126  CA  LYS A  33      20.465  14.359  23.232  1.00  0.00           C  
ATOM    127  C   LYS A  33      19.746  14.727  21.943  1.00  0.00           C  
ATOM    128  O   LYS A  33      18.724  14.160  21.562  1.00  0.00           O  
ATOM    129  N   GLU A  34      20.168  15.844  21.345  1.00  0.00           N  
ATOM    130  CA  GLU A  34      19.484  16.684  20.383  1.00  0.00           C  
ATOM    131  C   GLU A  34      20.104  16.824  19.000  1.00  0.00           C  
ATOM    132  O   GLU A  34      19.457  17.284  18.063  1.00  0.00           O  
ATOM    133  N   GLY A  35      21.390  16.476  18.909  1.00  0.00           N  
ATOM    134  CA  GLY A  35      22.073  16.555  17.634  1.00  0.00           C  
ATOM    135  C   GLY A  35      22.579  17.915  17.177  1.00  0.00           C  
ATOM    136  O   GLY A  35      22.995  18.088  16.034  1.00  0.00           O  
ATOM    137  N   ILE A  36      22.531  18.986  17.973  1.00  0.00           N  
ATOM    138  CA  ILE A  36      22.858  20.361  17.656  1.00  0.00           C  
ATOM    139  C   ILE A  36      24.339  20.589  17.920  1.00  0.00           C  
ATOM    140  O   ILE A  36      24.757  20.295  19.038  1.00  0.00           O  
ATOM    141  N   PRO A  37      25.117  20.974  16.906  1.00  0.00           N  
ATOM    142  CA  PRO A  37      26.564  21.026  16.973  1.00  0.00           C  
ATOM    143  C   PRO A  37      27.106  22.018  17.992  1.00  0.00           C  
ATOM    144  O   PRO A  37      26.490  23.072  18.132  1.00  0.00           O  
ATOM    145  N   PRO A  38      28.306  21.828  18.545  1.00  0.00           N  
ATOM    146  CA  PRO A  38      28.813  22.777  19.516  1.00  0.00           C  
ATOM    147  C   PRO A  38      28.778  24.278  19.273  1.00  0.00           C  
ATOM    148  O   PRO A  38      28.292  25.026  20.118  1.00  0.00           O  
ATOM    149  N   ASP A  39      29.402  24.727  18.182  1.00  0.00           N  
ATOM    150  CA  ASP A  39      29.615  26.106  17.791  1.00  0.00           C  
ATOM    151  C   ASP A  39      28.231  26.731  17.690  1.00  0.00           C  
ATOM    152  O   ASP A  39      28.159  27.889  18.098  1.00  0.00           O  
ATOM    153  N   GLN A  40      27.130  26.050  17.364  1.00  0.00           N  
ATOM    154  CA  GLN A  40      25.796  26.530  17.067  1.00  0.00           C  
ATOM    155  C   GLN A  40      25.055  26.602  18.395  1.00  0.00           C  
ATOM    156  O   GLN A  40      23.955  27.147  18.461  1.00  0.00           O  
ATOM    157  N   GLN A  41      25.473  26.037  19.530  1.00  0.00           N  
ATOM    158  CA  GLN A  41      24.989  26.040  20.896  1.00  0.00           C  
ATOM    159  C   GLN A  41      25.420  27.312  21.613  1.00  0.00           C  
ATOM    160  O   GLN A  41      26.611  27.473  21.870  1.00  0.00           O  
ATOM    161  N   ARG A  42      24.510  28.088  22.206  1.00  0.00           N  
ATOM    162  CA  ARG A  42      24.722  28.965  23.341  1.00  0.00           C  
ATOM    163  C   ARG A  42      24.229  28.291  24.612  1.00  0.00           C  
ATOM    164  O   ARG A  42      23.008  28.150  24.628  1.00  0.00           O  
ATOM    165  N   LEU A  43      24.966  28.117  25.712  1.00  0.00           N  
ATOM    166  CA  LEU A  43      24.505  27.962  27.076  1.00  0.00           C  
ATOM    167  C   LEU A  43      24.487  29.273  27.851  1.00  0.00           C  
ATOM    168  O   LEU A  43      25.479  29.999  27.804  1.00  0.00           O  
ATOM    169  N   ILE A  44      23.365  29.493  28.540  1.00  0.00           N  
ATOM    170  CA  ILE A  44      22.992  30.643  29.338  1.00  0.00           C  
ATOM    171  C   ILE A  44      22.383  30.328  30.698  1.00  0.00           C  
ATOM    172  O   ILE A  44      21.640  29.358  30.829  1.00  0.00           O  
ATOM    173  N   PHE A  45      22.958  30.919  31.747  1.00  0.00           N  
ATOM    174  CA  PHE A  45      22.551  30.818  33.135  1.00  0.00           C  
ATOM    175  C   PHE A  45      22.337  32.140  33.858  1.00  0.00           C  
ATOM    176  O   PHE A  45      23.267  32.933  33.727  1.00  0.00           O  
ATOM    177  N   ALA A  46      21.298  32.335  34.673  1.00  0.00           N  
ATOM    178  CA  ALA A  46      21.330  33.537  35.479  1.00  0.00           C  
ATOM    179  C   ALA A  46      21.679  34.796  34.698  1.00  0.00           C  
ATOM    180  O   ALA A  46      22.314  35.716  35.210  1.00  0.00           O  
ATOM    181  N   GLY A  47      21.198  34.925  33.460  1.00  0.00           N  
ATOM    182  CA  GLY A  47      21.485  36.088  32.644  1.00  0.00           C  
ATOM    183  C   GLY A  47      22.882  36.312  32.082  1.00  0.00           C  
ATOM    184  O   GLY A  47      23.144  37.346  31.472  1.00  0.00           O  
ATOM    185  N   LYS A  48      23.818  35.394  32.332  1.00  0.00           N  
ATOM    186  CA  LYS A  48      25.016  35.207  31.539  1.00  0.00           C  
ATOM    187  C   LYS A  48      25.130  34.147  30.453  1.00  0.00           C  
ATOM    188  O   LYS A  48      24.580  33.065  30.647  1.00  0.00           O  
ATOM    189  N   GLN A  49      25.659  34.458  29.269  1.00  0.00           N  
ATOM    190  CA  GLN A  49      26.224  33.456  28.389  1.00  0.00           C  
ATOM    191  C   GLN A  49      27.338  32.831  29.217  1.00  0.00           C  
ATOM    192  O   GLN A  49      27.936  33.491  30.063  1.00  0.00           O  
ATOM    193  N   LEU A  50      27.694  31.583  28.903  1.00  0.00           N  
ATOM    194  CA  LEU A  50      28.760  30.849  29.552  1.00  0.00           C  
ATOM    195  C   LEU A  50      29.950  30.678  28.619  1.00  0.00           C  
ATOM    196  O   LEU A  50      29.740  30.201  27.507  1.00  0.00           O  
ATOM    197  N   GLU A  51      31.178  30.882  29.103  1.00  0.00           N  
ATOM    198  CA  GLU A  51      32.354  30.691  28.279  1.00  0.00           C  
ATOM    199  C   GLU A  51      32.599  29.194  28.151  1.00  0.00           C  
ATOM    200  O   GLU A  51      32.669  28.476  29.145  1.00  0.00           O  
ATOM    201  N   ASP A  52      32.939  28.614  26.998  1.00  0.00           N  
ATOM    202  CA  ASP A  52      33.255  27.200  26.974  1.00  0.00           C  
ATOM    203  C   ASP A  52      34.311  26.674  27.934  1.00  0.00           C  
ATOM    204  O   ASP A  52      34.203  25.621  28.559  1.00  0.00           O  
ATOM    205  N   GLY A  53      35.379  27.425  28.215  1.00  0.00           N  
ATOM    206  CA  GLY A  53      36.499  26.971  29.015  1.00  0.00           C  
ATOM    207  C   GLY A  53      36.397  26.905  30.532  1.00  0.00           C  
ATOM    208  O   GLY A  53      37.342  26.537  31.227  1.00  0.00           O  
ATOM    209  N   ARG A  54      35.187  27.303  30.933  1.00  0.00           N  
ATOM    210  CA  ARG A  54      34.775  27.252  32.321  1.00  0.00           C  
ATOM    211  C   ARG A  54      33.932  26.030  32.660  1.00  0.00           C  
ATOM    212  O   ARG A  54      33.417  25.358  31.769  1.00  0.00           O  
ATOM    213  N   THR A  55      33.926  25.573  33.914  1.00  0.00           N  
ATOM    214  CA  THR A  55      33.190  24.479  34.514  1.00  0.00           C  
ATOM    215  C   THR A  55      31.819  24.861  35.056  1.00  0.00           C  
ATOM    216  O   THR A  55      31.433  26.027  35.102  1.00  0.00           O  
ATOM    217  N   LEU A  56      30.985  23.871  35.381  1.00  0.00           N  
ATOM    218  CA  LEU A  56      29.824  23.908  36.247  1.00  0.00           C  
ATOM    219  C   LEU A  56      30.153  24.595  37.565  1.00  0.00           C  
ATOM    220  O   LEU A  56      29.389  25.489  37.920  1.00  0.00           O  
ATOM    221  N   SER A  57      31.182  24.224  38.331  1.00  0.00           N  
ATOM    222  CA  SER A  57      31.614  24.808  39.585  1.00  0.00           C  
ATOM    223  C   SER A  57      31.969  26.276  39.394  1.00  0.00           C  
ATOM    224  O   SER A  57      31.539  27.004  40.285  1.00  0.00           O  
ATOM    225  N   ASP A  58      32.529  26.746  38.277  1.00  0.00           N  
ATOM    226  CA  ASP A  58      32.982  28.114  38.133  1.00  0.00           C  
ATOM    227  C   ASP A  58      31.775  29.036  38.225  1.00  0.00           C  
ATOM    228  O   ASP A  58      31.878  30.176  38.672  1.00  0.00           O  
ATOM    229  N   TYR A  59      30.676  28.624  37.589  1.00  0.00           N  
ATOM    230  CA  TYR A  59      29.406  29.321  37.537  1.00  0.00           C  
ATOM    231  C   TYR A  59      28.493  29.043  38.723  1.00  0.00           C  
ATOM    232  O   TYR A  59      27.391  29.581  38.637  1.00  0.00           O  
ATOM    233  N   ASN A  60      28.880  28.292  39.756  1.00  0.00           N  
ATOM    234  CA  ASN A  60      28.009  27.920  40.853  1.00  0.00           C  
ATOM    235  C   ASN A  60      26.815  27.048  40.493  1.00  0.00           C  
ATOM    236  O   ASN A  60      25.760  27.042  41.122  1.00  0.00           O  
ATOM    237  N   ILE A  61      27.004  26.294  39.407  1.00  0.00           N  
ATOM    238  CA  ILE A  61      26.007  25.477  38.745  1.00  0.00           C  
ATOM    239  C   ILE A  61      25.992  24.203  39.577  1.00  0.00           C  
ATOM    240  O   ILE A  61      27.031  23.554  39.674  1.00  0.00           O
[truncated: 6,336,953 more chars]
