# Supplementary material for: ENCORE: Software for Quantitative Ensemble Comparison
Source: PLoS Comput Biol. 2015 Oct 27;11(10):e1004415. doi: 10.1371/journal.pcbi.1004415 (PMC4624683; doi:10.1371/journal.pcbi.1004415)
Supplement: S1 Software — (GZ) [file pcbi.1004415.s001.gz › encore-master/examples/experimental_ubq_ensembles/filtered_2NR2.pdb]

MODEL      1
ATOM      1  N   GLN A   2      10.776  -6.214  -1.871  1.00  0.59           N  
ATOM      2  CA  GLN A   2       9.435  -6.666  -1.668  1.00  0.56           C  
ATOM      3  C   GLN A   2       8.820  -6.155  -0.411  1.00  0.50           C  
ATOM      4  O   GLN A   2       9.474  -5.975   0.616  1.00  0.60           O  
ATOM      5  N   ILE A   3       7.528  -5.796  -0.517  1.00  0.44           N  
ATOM      6  CA  ILE A   3       6.724  -5.370   0.586  1.00  0.42           C  
ATOM      7  C   ILE A   3       5.486  -6.198   0.654  1.00  0.40           C  
ATOM      8  O   ILE A   3       5.007  -6.701  -0.361  1.00  0.50           O  
ATOM      9  N   PHE A   4       4.894  -6.358   1.850  1.00  0.37           N  
ATOM     10  CA  PHE A   4       3.661  -7.033   2.112  1.00  0.38           C  
ATOM     11  C   PHE A   4       2.571  -6.027   2.255  1.00  0.39           C  
ATOM     12  O   PHE A   4       2.727  -5.001   2.914  1.00  0.60           O  
ATOM     13  N   VAL A   5       1.430  -6.329   1.611  1.00  0.35           N  
ATOM     14  CA  VAL A   5       0.252  -5.527   1.733  1.00  0.35           C  
ATOM     15  C   VAL A   5      -0.731  -6.417   2.412  1.00  0.35           C  
ATOM     16  O   VAL A   5      -1.316  -7.314   1.807  1.00  0.46           O  
ATOM     17  N   LYS A   6      -0.975  -6.198   3.716  1.00  0.36           N  
ATOM     18  CA  LYS A   6      -1.930  -6.944   4.475  1.00  0.39           C  
ATOM     19  C   LYS A   6      -3.316  -6.432   4.284  1.00  0.46           C  
ATOM     20  O   LYS A   6      -3.662  -5.271   4.498  1.00  0.53           O  
ATOM     21  N   THR A   7      -4.272  -7.297   3.899  1.00  0.58           N  
ATOM     22  CA  THR A   7      -5.618  -6.827   3.776  1.00  0.78           C  
ATOM     23  C   THR A   7      -6.356  -6.827   5.071  1.00  0.94           C  
ATOM     24  O   THR A   7      -5.733  -7.141   6.084  1.00  0.99           O  
ATOM     25  N   LEU A   8      -7.684  -6.622   5.042  1.00  1.17           N  
ATOM     26  CA  LEU A   8      -8.470  -6.805   6.222  1.00  1.39           C  
ATOM     27  C   LEU A   8      -8.658  -8.239   6.583  1.00  1.44           C  
ATOM     28  O   LEU A   8      -8.319  -8.724   7.661  1.00  1.60           O  
ATOM     29  N   THR A   9      -9.228  -9.066   5.687  1.00  1.41           N  
ATOM     30  CA  THR A   9      -9.582 -10.386   6.107  1.00  1.51           C  
ATOM     31  C   THR A   9      -8.484 -11.338   6.437  1.00  1.37           C  
ATOM     32  O   THR A   9      -8.716 -12.293   7.178  1.00  1.62           O  
ATOM     33  N   GLY A  10      -7.253 -11.155   5.927  1.00  1.18           N  
ATOM     34  CA  GLY A  10      -6.097 -11.940   6.228  1.00  1.22           C  
ATOM     35  C   GLY A  10      -5.330 -12.416   5.043  1.00  0.99           C  
ATOM     36  O   GLY A  10      -4.558 -13.370   5.124  1.00  1.31           O  
ATOM     37  N   LYS A  11      -5.455 -11.755   3.878  1.00  0.73           N  
ATOM     38  CA  LYS A  11      -4.769 -12.030   2.654  1.00  0.60           C  
ATOM     39  C   LYS A  11      -3.500 -11.254   2.712  1.00  0.51           C  
ATOM     40  O   LYS A  11      -3.559 -10.077   3.067  1.00  0.63           O  
ATOM     41  N   THR A  12      -2.292 -11.781   2.442  1.00  0.49           N  
ATOM     42  CA  THR A  12      -1.048 -11.078   2.385  1.00  0.48           C  
ATOM     43  C   THR A  12      -0.691 -11.074   0.938  1.00  0.52           C  
ATOM     44  O   THR A  12      -0.578 -12.124   0.308  1.00  0.72           O  
ATOM     45  N   ILE A  13      -0.474  -9.857   0.408  1.00  0.48           N  
ATOM     46  CA  ILE A  13      -0.100  -9.701  -0.963  1.00  0.55           C  
ATOM     47  C   ILE A  13       1.307  -9.210  -0.989  1.00  0.51           C  
ATOM     48  O   ILE A  13       1.626  -8.174  -0.410  1.00  0.56           O  
ATOM     49  N   THR A  14       2.189  -9.879  -1.753  1.00  0.55           N  
ATOM     50  CA  THR A  14       3.573  -9.532  -1.853  1.00  0.54           C  
ATOM     51  C   THR A  14       3.801  -8.821  -3.142  1.00  0.55           C  
ATOM     52  O   THR A  14       3.701  -9.397  -4.224  1.00  0.72           O  
ATOM     53  N   LEU A  15       4.200  -7.538  -3.075  1.00  0.50           N  
ATOM     54  CA  LEU A  15       4.518  -6.748  -4.223  1.00  0.55           C  
ATOM     55  C   LEU A  15       5.988  -6.557  -4.366  1.00  0.52           C  
ATOM     56  O   LEU A  15       6.712  -6.661  -3.377  1.00  0.58           O  
ATOM     57  N   GLU A  16       6.499  -6.260  -5.575  1.00  0.59           N  
ATOM     58  CA  GLU A  16       7.857  -5.938  -5.888  1.00  0.63           C  
ATOM     59  C   GLU A  16       7.873  -4.499  -6.275  1.00  0.65           C  
ATOM     60  O   GLU A  16       7.444  -4.201  -7.389  1.00  0.81           O  
ATOM     61  N   VAL A  17       8.488  -3.680  -5.403  1.00  0.61           N  
ATOM     62  CA  VAL A  17       8.647  -2.266  -5.545  1.00  0.63           C  
ATOM     63  C   VAL A  17      10.100  -1.943  -5.586  1.00  0.65           C  
ATOM     64  O   VAL A  17      10.963  -2.687  -5.122  1.00  0.76           O  
ATOM     65  N   GLU A  18      10.461  -0.770  -6.134  1.00  0.68           N  
ATOM     66  CA  GLU A  18      11.718  -0.124  -5.916  1.00  0.74           C  
ATOM     67  C   GLU A  18      11.547   0.760  -4.727  1.00  0.71           C  
ATOM     68  O   GLU A  18      10.428   1.270  -4.695  1.00  0.74           O  
ATOM     69  N   PRO A  19      12.434   1.052  -3.823  1.00  0.74           N  
ATOM     70  CA  PRO A  19      12.037   1.966  -2.793  1.00  0.74           C  
ATOM     71  C   PRO A  19      11.923   3.389  -3.219  1.00  0.70           C  
ATOM     72  O   PRO A  19      11.414   4.214  -2.461  1.00  0.74           O  
ATOM     73  N   SER A  20      12.322   3.636  -4.479  1.00  0.70           N  
ATOM     74  CA  SER A  20      12.256   4.903  -5.138  1.00  0.74           C  
ATOM     75  C   SER A  20      10.946   5.031  -5.837  1.00  0.71           C  
ATOM     76  O   SER A  20      10.723   5.995  -6.568  1.00  0.80           O  
ATOM     77  N   ASP A  21      10.020   4.078  -5.624  1.00  0.70           N  
ATOM     78  CA  ASP A  21       8.663   4.101  -6.073  1.00  0.73           C  
ATOM     79  C   ASP A  21       7.693   4.817  -5.198  1.00  0.64           C  
ATOM     80  O   ASP A  21       7.761   4.821  -3.970  1.00  0.66           O  
ATOM     81  N   THR A  22       6.695   5.502  -5.784  1.00  0.63           N  
ATOM     82  CA  THR A  22       5.681   6.213  -5.069  1.00  0.58           C  
ATOM     83  C   THR A  22       4.533   5.392  -4.590  1.00  0.53           C  
ATOM     84  O   THR A  22       4.407   4.243  -5.011  1.00  0.58           O  
ATOM     85  N   ILE A  23       3.807   5.938  -3.598  1.00  0.51           N  
ATOM     86  CA  ILE A  23       2.627   5.342  -3.054  1.00  0.48           C  
ATOM     87  C   ILE A  23       1.538   5.079  -4.035  1.00  0.48           C  
ATOM     88  O   ILE A  23       0.898   4.028  -4.072  1.00  0.51           O  
ATOM     89  N   GLU A  24       1.351   6.020  -4.978  1.00  0.50           N  
ATOM     90  CA  GLU A  24       0.663   5.842  -6.219  1.00  0.53           C  
ATOM     91  C   GLU A  24       1.029   4.634  -7.011  1.00  0.50           C  
ATOM     92  O   GLU A  24       0.177   3.942  -7.568  1.00  0.55           O  
ATOM     93  N   ASN A  25       2.332   4.335  -7.154  1.00  0.51           N  
ATOM     94  CA  ASN A  25       2.877   3.234  -7.884  1.00  0.52           C  
ATOM     95  C   ASN A  25       2.673   1.919  -7.212  1.00  0.47           C  
ATOM     96  O   ASN A  25       2.543   0.892  -7.876  1.00  0.53           O  
ATOM     97  N   VAL A  26       2.424   1.877  -5.891  1.00  0.45           N  
ATOM     98  CA  VAL A  26       2.070   0.706  -5.151  1.00  0.44           C  
ATOM     99  C   VAL A  26       0.642   0.386  -5.432  1.00  0.40           C  
ATOM    100  O   VAL A  26       0.292  -0.778  -5.626  1.00  0.44           O  
ATOM    101  N   LYS A  27      -0.271   1.367  -5.539  1.00  0.40           N  
ATOM    102  CA  LYS A  27      -1.656   1.193  -5.847  1.00  0.41           C  
ATOM    103  C   LYS A  27      -1.813   0.678  -7.237  1.00  0.38           C  
ATOM    104  O   LYS A  27      -2.684  -0.143  -7.517  1.00  0.42           O  
ATOM    105  N   ALA A  28      -1.049   1.179  -8.224  1.00  0.39           N  
ATOM    106  CA  ALA A  28      -0.991   0.690  -9.566  1.00  0.39           C  
ATOM    107  C   ALA A  28      -0.719  -0.767  -9.720  1.00  0.36           C  
ATOM    108  O   ALA A  28      -1.314  -1.440 -10.561  1.00  0.42           O  
ATOM    109  N   LYS A  29       0.258  -1.204  -8.906  1.00  0.39           N  
ATOM    110  CA  LYS A  29       0.568  -2.588  -8.723  1.00  0.43           C  
ATOM    111  C   LYS A  29      -0.556  -3.380  -8.151  1.00  0.44           C  
ATOM    112  O   LYS A  29      -0.752  -4.540  -8.511  1.00  0.54           O  
ATOM    113  N   ILE A  30      -1.431  -2.829  -7.291  1.00  0.41           N  
ATOM    114  CA  ILE A  30      -2.510  -3.618  -6.785  1.00  0.44           C  
ATOM    115  C   ILE A  30      -3.689  -3.730  -7.689  1.00  0.45           C  
ATOM    116  O   ILE A  30      -4.423  -4.716  -7.725  1.00  0.56           O  
ATOM    117  N   GLN A  31      -3.921  -2.651  -8.460  1.00  0.41           N  
ATOM    118  CA  GLN A  31      -4.810  -2.618  -9.579  1.00  0.48           C  
ATOM    119  C   GLN A  31      -4.507  -3.639 -10.620  1.00  0.52           C  
ATOM    120  O   GLN A  31      -5.365  -4.304 -11.198  1.00  0.66           O  
ATOM    121  N   ASP A  32      -3.212  -3.884 -10.887  1.00  0.50           N  
ATOM    122  CA  ASP A  32      -2.638  -4.951 -11.646  1.00  0.60           C  
ATOM    123  C   ASP A  32      -2.885  -6.267 -10.993  1.00  0.65           C  
ATOM    124  O   ASP A  32      -3.324  -7.199 -11.665  1.00  0.81           O  
ATOM    125  N   LYS A  33      -2.600  -6.442  -9.690  1.00  0.62           N  
ATOM    126  CA  LYS A  33      -2.652  -7.669  -8.959  1.00  0.73           C  
ATOM    127  C   LYS A  33      -4.057  -8.115  -8.736  1.00  0.69           C  
ATOM    128  O   LYS A  33      -4.540  -9.124  -9.247  1.00  0.83           O  
ATOM    129  N   GLU A  34      -4.858  -7.323  -8.000  1.00  0.63           N  
ATOM    130  CA  GLU A  34      -6.162  -7.615  -7.494  1.00  0.67           C  
ATOM    131  C   GLU A  34      -7.300  -7.028  -8.256  1.00  0.69           C  
ATOM    132  O   GLU A  34      -8.365  -7.642  -8.286  1.00  0.95           O  
ATOM    133  N   GLY A  35      -7.140  -5.813  -8.810  1.00  0.63           N  
ATOM    134  CA  GLY A  35      -8.123  -5.188  -9.639  1.00  0.68           C  
ATOM    135  C   GLY A  35      -8.845  -4.076  -8.957  1.00  0.76           C  
ATOM    136  O   GLY A  35      -9.809  -3.482  -9.438  1.00  1.12           O  
ATOM    137  N   ILE A  36      -8.258  -3.742  -7.795  1.00  0.70           N  
ATOM    138  CA  ILE A  36      -8.838  -2.688  -7.022  1.00  0.76           C  
ATOM    139  C   ILE A  36      -8.547  -1.336  -7.577  1.00  0.71           C  
ATOM    140  O   ILE A  36      -7.379  -1.171  -7.929  1.00  0.73           O  
ATOM    141  N   PRO A  37      -9.389  -0.396  -7.890  1.00  0.75           N  
ATOM    142  CA  PRO A  37      -8.936   0.894  -8.326  1.00  0.79           C  
ATOM    143  C   PRO A  37      -8.202   1.749  -7.350  1.00  0.75           C  
ATOM    144  O   PRO A  37      -8.369   1.533  -6.151  1.00  0.75           O  
ATOM    145  N   PRO A  38      -7.350   2.668  -7.691  1.00  0.81           N  
ATOM    146  CA  PRO A  38      -6.670   3.376  -6.645  1.00  0.85           C  
ATOM    147  C   PRO A  38      -7.471   4.382  -5.893  1.00  0.89           C  
ATOM    148  O   PRO A  38      -7.054   4.809  -4.819  1.00  0.99           O  
ATOM    149  N   ASP A  39      -8.690   4.688  -6.374  1.00  0.96           N  
ATOM    150  CA  ASP A  39      -9.591   5.557  -5.683  1.00  1.11           C  
ATOM    151  C   ASP A  39      -9.930   5.022  -4.335  1.00  1.00           C  
ATOM    152  O   ASP A  39      -9.948   5.802  -3.384  1.00  1.14           O  
ATOM    153  N   GLN A  40     -10.218   3.711  -4.244  1.00  0.87           N  
ATOM    154  CA  GLN A  40     -10.609   3.154  -2.986  1.00  0.84           C  
ATOM    155  C   GLN A  40      -9.416   2.908  -2.128  1.00  0.67           C  
ATOM    156  O   GLN A  40      -9.514   2.841  -0.904  1.00  0.80           O  
ATOM    157  N   GLN A  41      -8.212   2.624  -2.657  1.00  0.56           N  
ATOM    158  CA  GLN A  41      -7.091   2.237  -1.858  1.00  0.51           C  
ATOM    159  C   GLN A  41      -6.460   3.193  -0.905  1.00  0.49           C  
ATOM    160  O   GLN A  41      -5.842   4.182  -1.297  1.00  0.65           O  
ATOM    161  N   ARG A  42      -6.615   3.055   0.424  1.00  0.47           N  
ATOM    162  CA  ARG A  42      -5.891   3.840   1.375  1.00  0.55           C  
ATOM    163  C   ARG A  42      -4.760   3.055   1.946  1.00  0.46           C  
ATOM    164  O   ARG A  42      -4.984   1.915   2.350  1.00  0.52           O  
ATOM    165  N   LEU A  43      -3.548   3.593   2.171  1.00  0.46           N  
ATOM    166  CA  LEU A  43      -2.515   2.781   2.734  1.00  0.42           C  
ATOM    167  C   LEU A  43      -2.138   3.232   4.104  1.00  0.43           C  
ATOM    168  O   LEU A  43      -2.102   4.440   4.333  1.00  0.55           O  
ATOM    169  N   ILE A  44      -1.862   2.304   5.036  1.00  0.42           N  
ATOM    170  CA  ILE A  44      -1.347   2.614   6.334  1.00  0.46           C  
ATOM    171  C   ILE A  44      -0.136   1.799   6.634  1.00  0.42           C  
ATOM    172  O   ILE A  44      -0.187   0.629   6.260  1.00  0.53           O  
ATOM    173  N   PHE A  45       0.926   2.376   7.225  1.00  0.42           N  
ATOM    174  CA  PHE A  45       2.085   1.633   7.613  1.00  0.46           C  
ATOM    175  C   PHE A  45       2.190   1.697   9.098  1.00  0.68           C  
ATOM    176  O   PHE A  45       2.278   0.688   9.795  1.00  1.50           O  
ATOM    177  N   ALA A  46       2.202   2.917   9.664  1.00  0.81           N  
ATOM    178  CA  ALA A  46       2.258   3.097  11.082  1.00  0.96           C  
ATOM    179  C   ALA A  46       1.125   3.864  11.671  1.00  0.97           C  
ATOM    180  O   ALA A  46       0.220   3.258  12.244  1.00  1.21           O  
ATOM    181  N   GLY A  47       1.051   5.201  11.550  1.00  0.99           N  
ATOM    182  CA  GLY A  47      -0.008   6.001  12.081  1.00  1.10           C  
ATOM    183  C   GLY A  47      -0.684   6.865  11.073  1.00  1.03           C  
ATOM    184  O   GLY A  47      -1.902   7.023  11.137  1.00  1.30           O  
ATOM    185  N   LYS A  48       0.032   7.562  10.173  1.00  0.98           N  
ATOM    186  CA  LYS A  48      -0.626   8.339   9.169  1.00  1.05           C  
ATOM    187  C   LYS A  48      -0.869   7.615   7.889  1.00  0.84           C  
ATOM    188  O   LYS A  48      -0.216   6.638   7.525  1.00  0.81           O  
ATOM    189  N   GLN A  49      -1.954   8.082   7.245  1.00  0.84           N  
ATOM    190  CA  GLN A  49      -2.404   7.611   5.972  1.00  0.80           C  
ATOM    191  C   GLN A  49      -1.681   8.275   4.851  1.00  0.72           C  
ATOM    192  O   GLN A  49      -1.639   9.493   4.680  1.00  0.83           O  
ATOM    193  N   LEU A  50      -1.041   7.413   4.040  1.00  0.69           N  
ATOM    194  CA  LEU A  50      -0.008   7.773   3.118  1.00  0.66           C  
ATOM    195  C   LEU A  50      -0.503   8.400   1.861  1.00  0.72           C  
ATOM    196  O   LEU A  50      -1.452   7.934   1.233  1.00  0.90           O  
ATOM    197  N   GLU A  51       0.143   9.525   1.507  1.00  0.70           N  
ATOM    198  CA  GLU A  51      -0.190  10.238   0.313  1.00  0.76           C  
ATOM    199  C   GLU A  51       0.523   9.781  -0.913  1.00  0.77           C  
ATOM    200  O   GLU A  51       1.581   9.180  -0.729  1.00  1.23           O  
ATOM    201  N   ASP A  52       0.021   9.980  -2.145  1.00  0.66           N  
ATOM    202  CA  ASP A  52       0.505   9.470  -3.390  1.00  0.65           C  
ATOM    203  C   ASP A  52       1.830   9.982  -3.837  1.00  0.60           C  
ATOM    204  O   ASP A  52       2.697   9.167  -4.146  1.00  0.62           O  
ATOM    205  N   GLY A  53       2.118  11.296  -3.834  1.00  0.68           N  
ATOM    206  CA  GLY A  53       3.386  11.889  -4.126  1.00  0.73           C  
ATOM    207  C   GLY A  53       4.560  11.888  -3.208  1.00  0.72           C  
ATOM    208  O   GLY A  53       5.365  12.800  -3.032  1.00  0.97           O  
ATOM    209  N   ARG A  54       4.718  10.736  -2.531  1.00  0.64           N  
ATOM    210  CA  ARG A  54       5.851  10.401  -1.726  1.00  0.63           C  
ATOM    211  C   ARG A  54       6.203   8.969  -1.941  1.00  0.59           C  
ATOM    212  O   ARG A  54       5.431   8.186  -2.493  1.00  0.62           O  
ATOM    213  N   THR A  55       7.517   8.744  -1.767  1.00  0.63           N  
ATOM    214  CA  THR A  55       8.074   7.445  -1.989  1.00  0.61           C  
ATOM    215  C   THR A  55       8.104   6.596  -0.765  1.00  0.59           C  
ATOM    216  O   THR A  55       7.957   7.026   0.378  1.00  0.64           O  
ATOM    217  N   LEU A  56       8.186   5.259  -0.883  1.00  0.58           N  
ATOM    218  CA  LEU A  56       8.402   4.261   0.118  1.00  0.59           C  
ATOM    219  C   LEU A  56       9.571   4.686   0.939  1.00  0.64           C  
ATOM    220  O   LEU A  56       9.465   4.658   2.165  1.00  0.70           O  
ATOM    221  N   SER A  57      10.715   5.086   0.357  1.00  0.68           N  
ATOM    222  CA  SER A  57      11.894   5.563   1.010  1.00  0.75           C  
ATOM    223  C   SER A  57      11.760   6.734   1.922  1.00  0.76           C  
ATOM    224  O   SER A  57      12.262   6.759   3.045  1.00  0.84           O  
ATOM    225  N   ASP A  58      10.939   7.734   1.555  1.00  0.75           N  
ATOM    226  CA  ASP A  58      10.566   8.842   2.378  1.00  0.78           C  
ATOM    227  C   ASP A  58      10.009   8.422   3.694  1.00  0.77           C  
ATOM    228  O   ASP A  58      10.553   8.800   4.731  1.00  0.86           O  
ATOM    229  N   TYR A  59       8.936   7.614   3.636  1.00  0.72           N  
ATOM    230  CA  TYR A  59       8.207   7.036   4.721  1.00  0.73           C  
ATOM    231  C   TYR A  59       8.981   6.085   5.569  1.00  0.76           C  
ATOM    232  O   TYR A  59       8.583   5.681   6.661  1.00  0.89           O  
ATOM    233  N   ASN A  60      10.116   5.667   4.981  1.00  0.74           N  
ATOM    234  CA  ASN A  60      11.103   4.769   5.495  1.00  0.79           C  
ATOM    235  C   ASN A  60      10.606   3.368   5.594  1.00  0.75           C  
ATOM    236  O   ASN A  60      10.569   2.712   6.634  1.00  0.86           O  
ATOM    237  N   ILE A  61      10.044   2.844   4.491  1.00  0.67           N  
ATOM    238  CA  ILE A  61       9.549   1.505   4.397  1.00  0.65           C  
ATOM    239  C   ILE A  61      10.649   0.641   3.887  1.00  0.66           C  
ATOM    240  O   ILE A  61      11.146   0.913   2.795  1.00  0.75           O  
ATOM    241  N   GLN A  62      10.997  -0.404   4.658  1.00  0.67           N  
ATOM    242  CA  GLN A  62      12.108  -1.263   4.386  1.00  0.70           C  
ATOM    243  C   GLN A  62      11.668  -2.394   3.522  1.00  0.62           C  
ATOM    244  O   GLN A  62      10.542  -2.428   3.029  1.00  0.64           O  
ATOM    245  N   LYS A  63      12.572  -3.386   3.432  1.00  0.64           N  
ATOM    246  CA  LYS A  63      12.378  -4.652   2.797  1.00  0.62           C  
ATOM    247  C   LYS A  63      11.530  -5.441   3.734  1.00  0.59           C  
ATOM    248  O   LYS A  63      11.688  -5.440   4.954  1.00  0.66           O  
ATOM    249  N   GLU A  64      10.535  -6.180   3.212  1.00  0.57           N  
ATOM    250  CA  GLU A  64       9.601  -7.067   3.834  1.00  0.58           C  
ATOM    251  C   GLU A  64       8.872  -6.347   4.916  1.00  0.56           C  
ATOM    252  O   GLU A  64       8.812  -6.824   6.048  1.00  0.70           O  
ATOM    253  N   SER A  65       8.281  -5.172   4.634  1.00  0.51           N  
ATOM    254  CA  SER A  65       7.583  -4.408   5.621  1.00  0.51           C  
ATOM    255  C   SER A  65       6.137  -4.648   5.349  1.00  0.43           C  
ATOM    256  O   SER A  65       5.832  -5.028   4.219  1.00  0.50           O  
ATOM    257  N   THR A  66       5.280  -4.606   6.383  1.00  0.45           N  
ATOM    258  CA  THR A  66       3.867  -4.795   6.261  1.00  0.45           C  
ATOM    259  C   THR A  66       3.114  -3.510   6.275  1.00  0.43           C  
ATOM    260  O   THR A  66       3.116  -2.740   7.234  1.00  0.58           O  
ATOM    261  N   LEU A  67       2.408  -3.234   5.162  1.00  0.38           N  
ATOM    262  CA  LEU A  67       1.468  -2.171   4.994  1.00  0.38           C  
ATOM    263  C   LEU A  67       0.122  -2.799   5.106  1.00  0.37           C  
ATOM    264  O   LEU A  67      -0.058  -3.981   4.818  1.00  0.50           O  
ATOM    265  N   HIS A  68      -0.880  -2.067   5.626  1.00  0.35           N  
ATOM    266  CA  HIS A  68      -2.274  -2.339   5.796  1.00  0.37           C  
ATOM    267  C   HIS A  68      -3.077  -1.704   4.713  1.00  0.35           C  
ATOM    268  O   HIS A  68      -2.811  -0.562   4.342  1.00  0.48           O  
ATOM    269  N   LEU A  69      -3.966  -2.487   4.076  1.00  0.36           N  
ATOM    270  CA  LEU A  69      -4.646  -1.866   2.982  1.00  0.38           C  
ATOM    271  C   LEU A  69      -6.050  -1.660   3.436  1.00  0.41           C  
ATOM    272  O   LEU A  69      -6.771  -2.606   3.746  1.00  0.56           O  
ATOM    273  N   VAL A  70      -6.445  -0.377   3.531  1.00  0.45           N  
ATOM    274  CA  VAL A  70      -7.797  -0.014   3.824  1.00  0.56           C  
ATOM    275  C   VAL A  70      -8.475   0.352   2.550  1.00  0.55           C  
ATOM    276  O   VAL A  70      -7.991   1.183   1.783  1.00  0.58           O  
TER
ENDMDL
MODEL      2
ATOM      1  N   GLN A   2      11.065  -5.765  -1.509  1.00  0.59           N  
ATOM      2  CA  GLN A   2       9.831  -6.413  -1.192  1.00  0.56           C  
ATOM      3  C   GLN A   2       9.130  -5.827  -0.015  1.00  0.50           C  
ATOM      4  O   GLN A   2       9.777  -5.491   0.976  1.00  0.60           O  
ATOM      5  N   ILE A   3       7.790  -5.727  -0.085  1.00  0.44           N  
ATOM      6  CA  ILE A   3       6.887  -5.363   0.963  1.00  0.42           C  
ATOM      7  C   ILE A   3       5.712  -6.269   0.820  1.00  0.40           C  
ATOM      8  O   ILE A   3       5.478  -7.003  -0.138  1.00  0.50           O  
ATOM      9  N   PHE A   4       4.923  -6.272   1.909  1.00  0.37           N  
ATOM     10  CA  PHE A   4       3.707  -7.024   1.932  1.00  0.38           C  
ATOM     11  C   PHE A   4       2.545  -6.154   2.270  1.00  0.39           C  
ATOM     12  O   PHE A   4       2.614  -5.367   3.213  1.00  0.60           O  
ATOM     13  N   VAL A   5       1.377  -6.349   1.633  1.00  0.35           N  
ATOM     14  CA  VAL A   5       0.175  -5.633   1.936  1.00  0.35           C  
ATOM     15  C   VAL A   5      -0.858  -6.480   2.595  1.00  0.35           C  
ATOM     16  O   VAL A   5      -1.320  -7.463   2.017  1.00  0.46           O  
ATOM     17  N   LYS A   6      -1.354  -6.193   3.812  1.00  0.36           N  
ATOM     18  CA  LYS A   6      -2.431  -6.953   4.365  1.00  0.39           C  
ATOM     19  C   LYS A   6      -3.755  -6.322   4.104  1.00  0.46           C  
ATOM     20  O   LYS A   6      -3.888  -5.107   4.244  1.00  0.53           O  
ATOM     21  N   THR A   7      -4.765  -7.135   3.745  1.00  0.58           N  
ATOM     22  CA  THR A   7      -6.052  -6.573   3.477  1.00  0.78           C  
ATOM     23  C   THR A   7      -6.798  -6.330   4.744  1.00  0.94           C  
ATOM     24  O   THR A   7      -6.299  -6.253   5.866  1.00  0.99           O  
ATOM     25  N   LEU A   8      -8.118  -6.102   4.621  1.00  1.17           N  
ATOM     26  CA  LEU A   8      -8.977  -6.072   5.763  1.00  1.39           C  
ATOM     27  C   LEU A   8      -9.316  -7.421   6.297  1.00  1.44           C  
ATOM     28  O   LEU A   8      -9.339  -7.677   7.501  1.00  1.60           O  
ATOM     29  N   THR A   9      -9.649  -8.339   5.373  1.00  1.41           N  
ATOM     30  CA  THR A   9     -10.010  -9.670   5.754  1.00  1.51           C  
ATOM     31  C   THR A   9      -8.758 -10.408   6.077  1.00  1.37           C  
ATOM     32  O   THR A   9      -8.611 -11.083   7.095  1.00  1.62           O  
ATOM     33  N   GLY A  10      -7.746 -10.459   5.193  1.00  1.18           N  
ATOM     34  CA  GLY A  10      -6.576 -11.169   5.609  1.00  1.22           C  
ATOM     35  C   GLY A  10      -5.706 -11.575   4.471  1.00  0.99           C  
ATOM     36  O   GLY A  10      -4.938 -12.513   4.683  1.00  1.31           O  
ATOM     37  N   LYS A  11      -5.703 -11.004   3.253  1.00  0.73           N  
ATOM     38  CA  LYS A  11      -4.870 -11.413   2.164  1.00  0.60           C  
ATOM     39  C   LYS A  11      -3.574 -10.697   2.329  1.00  0.51           C  
ATOM     40  O   LYS A  11      -3.589  -9.509   2.644  1.00  0.63           O  
ATOM     41  N   THR A  12      -2.427 -11.355   2.078  1.00  0.49           N  
ATOM     42  CA  THR A  12      -1.131 -10.752   2.020  1.00  0.48           C  
ATOM     43  C   THR A  12      -0.710 -10.564   0.603  1.00  0.52           C  
ATOM     44  O   THR A  12      -0.623 -11.529  -0.155  1.00  0.72           O  
ATOM     45  N   ILE A  13      -0.545  -9.344   0.061  1.00  0.48           N  
ATOM     46  CA  ILE A  13      -0.185  -9.189  -1.315  1.00  0.55           C  
ATOM     47  C   ILE A  13       1.288  -9.010  -1.444  1.00  0.51           C  
ATOM     48  O   ILE A  13       1.838  -8.086  -0.846  1.00  0.56           O  
ATOM     49  N   THR A  14       2.013  -9.848  -2.209  1.00  0.55           N  
ATOM     50  CA  THR A  14       3.433  -9.686  -2.255  1.00  0.54           C  
ATOM     51  C   THR A  14       3.818  -8.705  -3.308  1.00  0.55           C  
ATOM     52  O   THR A  14       3.437  -8.874  -4.465  1.00  0.72           O  
ATOM     53  N   LEU A  15       4.585  -7.648  -2.987  1.00  0.50           N  
ATOM     54  CA  LEU A  15       4.961  -6.709  -3.998  1.00  0.55           C  
ATOM     55  C   LEU A  15       6.435  -6.499  -4.047  1.00  0.52           C  
ATOM     56  O   LEU A  15       7.141  -6.637  -3.050  1.00  0.58           O  
ATOM     57  N   GLU A  16       6.847  -6.138  -5.275  1.00  0.59           N  
ATOM     58  CA  GLU A  16       8.176  -5.741  -5.624  1.00  0.63           C  
ATOM     59  C   GLU A  16       8.159  -4.386  -6.242  1.00  0.65           C  
ATOM     60  O   GLU A  16       7.744  -4.195  -7.383  1.00  0.81           O  
ATOM     61  N   VAL A  17       8.619  -3.427  -5.418  1.00  0.61           N  
ATOM     62  CA  VAL A  17       8.638  -2.036  -5.751  1.00  0.63           C  
ATOM     63  C   VAL A  17      10.085  -1.704  -5.624  1.00  0.65           C  
ATOM     64  O   VAL A  17      10.973  -2.553  -5.541  1.00  0.76           O  
ATOM     65  N   GLU A  18      10.375  -0.391  -5.633  1.00  0.68           N  
ATOM     66  CA  GLU A  18      11.625   0.217  -5.292  1.00  0.74           C  
ATOM     67  C   GLU A  18      11.343   1.168  -4.180  1.00  0.71           C  
ATOM     68  O   GLU A  18      10.177   1.473  -3.931  1.00  0.74           O  
ATOM     69  N   PRO A  19      12.302   1.620  -3.428  1.00  0.74           N  
ATOM     70  CA  PRO A  19      11.996   2.532  -2.366  1.00  0.74           C  
ATOM     71  C   PRO A  19      11.924   3.912  -2.923  1.00  0.70           C  
ATOM     72  O   PRO A  19      11.409   4.773  -2.210  1.00  0.74           O  
ATOM     73  N   SER A  20      12.422   4.142  -4.150  1.00  0.70           N  
ATOM     74  CA  SER A  20      12.233   5.385  -4.832  1.00  0.74           C  
ATOM     75  C   SER A  20      10.900   5.481  -5.491  1.00  0.71           C  
ATOM     76  O   SER A  20      10.615   6.508  -6.108  1.00  0.80           O  
ATOM     77  N   ASP A  21      10.016   4.473  -5.391  1.00  0.70           N  
ATOM     78  CA  ASP A  21       8.708   4.569  -5.962  1.00  0.73           C  
ATOM     79  C   ASP A  21       7.761   5.282  -5.058  1.00  0.64           C  
ATOM     80  O   ASP A  21       7.931   5.475  -3.856  1.00  0.66           O  
ATOM     81  N   THR A  22       6.715   5.818  -5.712  1.00  0.63           N  
ATOM     82  CA  THR A  22       5.687   6.512  -5.000  1.00  0.58           C  
ATOM     83  C   THR A  22       4.602   5.597  -4.545  1.00  0.53           C  
ATOM     84  O   THR A  22       4.460   4.497  -5.075  1.00  0.58           O  
ATOM     85  N   ILE A  23       3.808   6.113  -3.589  1.00  0.51           N  
ATOM     86  CA  ILE A  23       2.631   5.474  -3.085  1.00  0.48           C  
ATOM     87  C   ILE A  23       1.622   5.332  -4.172  1.00  0.48           C  
ATOM     88  O   ILE A  23       1.003   4.270  -4.179  1.00  0.51           O  
ATOM     89  N   GLU A  24       1.481   6.251  -5.144  1.00  0.50           N  
ATOM     90  CA  GLU A  24       0.665   6.067  -6.303  1.00  0.53           C  
ATOM     91  C   GLU A  24       0.980   4.849  -7.102  1.00  0.50           C  
ATOM     92  O   GLU A  24       0.057   4.122  -7.465  1.00  0.55           O  
ATOM     93  N   ASN A  25       2.276   4.615  -7.379  1.00  0.51           N  
ATOM     94  CA  ASN A  25       2.775   3.446  -8.034  1.00  0.52           C  
ATOM     95  C   ASN A  25       2.417   2.153  -7.387  1.00  0.47           C  
ATOM     96  O   ASN A  25       2.127   1.160  -8.053  1.00  0.53           O  
ATOM     97  N   VAL A  26       2.396   2.084  -6.044  1.00  0.45           N  
ATOM     98  CA  VAL A  26       1.927   0.965  -5.287  1.00  0.44           C  
ATOM     99  C   VAL A  26       0.484   0.658  -5.496  1.00  0.40           C  
ATOM    100  O   VAL A  26       0.103  -0.511  -5.551  1.00  0.44           O  
ATOM    101  N   LYS A  27      -0.399   1.668  -5.586  1.00  0.40           N  
ATOM    102  CA  LYS A  27      -1.777   1.493  -5.924  1.00  0.41           C  
ATOM    103  C   LYS A  27      -1.995   0.916  -7.281  1.00  0.38           C  
ATOM    104  O   LYS A  27      -3.023   0.262  -7.456  1.00  0.42           O  
ATOM    105  N   ALA A  28      -1.114   1.114  -8.278  1.00  0.39           N  
ATOM    106  CA  ALA A  28      -1.159   0.562  -9.597  1.00  0.39           C  
ATOM    107  C   ALA A  28      -0.793  -0.883  -9.562  1.00  0.36           C  
ATOM    108  O   ALA A  28      -1.354  -1.709 -10.281  1.00  0.42           O  
ATOM    109  N   LYS A  29       0.025  -1.362  -8.609  1.00  0.39           N  
ATOM    110  CA  LYS A  29       0.431  -2.726  -8.468  1.00  0.43           C  
ATOM    111  C   LYS A  29      -0.677  -3.564  -7.932  1.00  0.44           C  
ATOM    112  O   LYS A  29      -0.927  -4.658  -8.435  1.00  0.54           O  
ATOM    113  N   ILE A  30      -1.483  -2.989  -7.021  1.00  0.41           N  
ATOM    114  CA  ILE A  30      -2.634  -3.671  -6.515  1.00  0.44           C  
ATOM    115  C   ILE A  30      -3.731  -3.812  -7.512  1.00  0.45           C  
ATOM    116  O   ILE A  30      -4.345  -4.863  -7.693  1.00  0.56           O  
ATOM    117  N   GLN A  31      -3.975  -2.765  -8.320  1.00  0.41           N  
ATOM    118  CA  GLN A  31      -4.824  -2.782  -9.470  1.00  0.48           C  
ATOM    119  C   GLN A  31      -4.537  -3.846 -10.471  1.00  0.52           C  
ATOM    120  O   GLN A  31      -5.422  -4.487 -11.037  1.00  0.66           O  
ATOM    121  N   ASP A  32      -3.247  -4.141 -10.714  1.00  0.50           N  
ATOM    122  CA  ASP A  32      -2.757  -5.203 -11.536  1.00  0.60           C  
ATOM    123  C   ASP A  32      -2.999  -6.561 -10.973  1.00  0.65           C  
ATOM    124  O   ASP A  32      -3.377  -7.441 -11.744  1.00  0.81           O  
ATOM    125  N   LYS A  33      -2.712  -6.790  -9.678  1.00  0.62           N  
ATOM    126  CA  LYS A  33      -2.786  -8.058  -9.021  1.00  0.73           C  
ATOM    127  C   LYS A  33      -4.157  -8.469  -8.610  1.00  0.69           C  
ATOM    128  O   LYS A  33      -4.617  -9.548  -8.977  1.00  0.83           O  
ATOM    129  N   GLU A  34      -4.860  -7.637  -7.821  1.00  0.63           N  
ATOM    130  CA  GLU A  34      -6.121  -8.048  -7.285  1.00  0.67           C  
ATOM    131  C   GLU A  34      -7.242  -7.598  -8.157  1.00  0.69           C  
ATOM    132  O   GLU A  34      -8.215  -8.251  -8.534  1.00  0.95           O  
ATOM    133  N   GLY A  35      -7.098  -6.317  -8.537  1.00  0.63           N  
ATOM    134  CA  GLY A  35      -7.992  -5.658  -9.438  1.00  0.68           C  
ATOM    135  C   GLY A  35      -8.886  -4.711  -8.714  1.00  0.76           C  
ATOM    136  O   GLY A  35     -10.115  -4.739  -8.746  1.00  1.12           O  
ATOM    137  N   ILE A  36      -8.252  -3.776  -7.986  1.00  0.70           N  
ATOM    138  CA  ILE A  36      -8.919  -2.946  -7.031  1.00  0.76           C  
ATOM    139  C   ILE A  36      -8.574  -1.568  -7.476  1.00  0.71           C  
ATOM    140  O   ILE A  36      -7.411  -1.331  -7.797  1.00  0.73           O  
ATOM    141  N   PRO A  37      -9.458  -0.638  -7.687  1.00  0.75           N  
ATOM    142  CA  PRO A  37      -9.175   0.635  -8.284  1.00  0.79           C  
ATOM    143  C   PRO A  37      -8.289   1.418  -7.378  1.00  0.75           C  
ATOM    144  O   PRO A  37      -8.515   1.362  -6.169  1.00  0.75           O  
ATOM    145  N   PRO A  38      -7.291   2.122  -7.824  1.00  0.81           N  
ATOM    146  CA  PRO A  38      -6.440   2.883  -6.957  1.00  0.85           C  
ATOM    147  C   PRO A  38      -7.125   4.006  -6.255  1.00  0.89           C  
ATOM    148  O   PRO A  38      -6.601   4.330  -5.190  1.00  0.99           O  
ATOM    149  N   ASP A  39      -8.338   4.453  -6.622  1.00  0.96           N  
ATOM    150  CA  ASP A  39      -9.125   5.281  -5.762  1.00  1.11           C  
ATOM    151  C   ASP A  39      -9.744   4.563  -4.613  1.00  1.00           C  
ATOM    152  O   ASP A  39     -10.149   5.138  -3.604  1.00  1.14           O  
ATOM    153  N   GLN A  40      -9.805   3.221  -4.661  1.00  0.87           N  
ATOM    154  CA  GLN A  40     -10.393   2.497  -3.575  1.00  0.84           C  
ATOM    155  C   GLN A  40      -9.383   2.092  -2.557  1.00  0.67           C  
ATOM    156  O   GLN A  40      -9.724   1.362  -1.629  1.00  0.80           O  
ATOM    157  N   GLN A  41      -8.099   2.478  -2.666  1.00  0.56           N  
ATOM    158  CA  GLN A  41      -7.049   1.997  -1.821  1.00  0.51           C  
ATOM    159  C   GLN A  41      -6.382   2.946  -0.886  1.00  0.49           C  
ATOM    160  O   GLN A  41      -5.542   3.805  -1.154  1.00  0.65           O  
ATOM    161  N   ARG A  42      -6.765   2.900   0.402  1.00  0.47           N  
ATOM    162  CA  ARG A  42      -6.101   3.667   1.411  1.00  0.55           C  
ATOM    163  C   ARG A  42      -5.041   2.853   2.070  1.00  0.46           C  
ATOM    164  O   ARG A  42      -5.346   1.844   2.703  1.00  0.52           O  
ATOM    165  N   LEU A  43      -3.797   3.367   2.020  1.00  0.46           N  
ATOM    166  CA  LEU A  43      -2.669   2.588   2.426  1.00  0.42           C  
ATOM    167  C   LEU A  43      -2.141   3.215   3.671  1.00  0.43           C  
ATOM    168  O   LEU A  43      -1.897   4.418   3.761  1.00  0.55           O  
ATOM    169  N   ILE A  44      -2.037   2.395   4.732  1.00  0.42           N  
ATOM    170  CA  ILE A  44      -1.577   2.679   6.055  1.00  0.46           C  
ATOM    171  C   ILE A  44      -0.277   1.984   6.274  1.00  0.42           C  
ATOM    172  O   ILE A  44      -0.036   0.897   5.753  1.00  0.53           O  
ATOM    173  N   PHE A  45       0.670   2.575   7.023  1.00  0.42           N  
ATOM    174  CA  PHE A  45       1.889   1.893   7.330  1.00  0.46           C  
ATOM    175  C   PHE A  45       2.055   2.401   8.721  1.00  0.68           C  
ATOM    176  O   PHE A  45       2.076   3.594   9.019  1.00  1.50           O  
ATOM    177  N   ALA A  46       2.018   1.517   9.734  1.00  0.81           N  
ATOM    178  CA  ALA A  46       2.111   1.721  11.146  1.00  0.96           C  
ATOM    179  C   ALA A  46       1.378   2.844  11.794  1.00  0.97           C  
ATOM    180  O   ALA A  46       1.821   3.537  12.708  1.00  1.21           O  
ATOM    181  N   GLY A  47       0.136   3.106  11.346  1.00  0.99           N  
ATOM    182  CA  GLY A  47      -0.747   4.104  11.868  1.00  1.10           C  
ATOM    183  C   GLY A  47      -0.737   5.325  11.016  1.00  1.03           C  
ATOM    184  O   GLY A  47      -1.656   6.137  10.930  1.00  1.30           O  
ATOM    185  N   LYS A  48       0.364   5.578  10.287  1.00  0.98           N  
ATOM    186  CA  LYS A  48       0.508   6.667   9.371  1.00  1.05           C  
ATOM    187  C   LYS A  48      -0.238   6.282   8.140  1.00  0.84           C  
ATOM    188  O   LYS A  48      -0.040   5.224   7.547  1.00  0.81           O  
ATOM    189  N   GLN A  49      -1.089   7.206   7.659  1.00  0.84           N  
ATOM    190  CA  GLN A  49      -1.631   7.119   6.339  1.00  0.80           C  
ATOM    191  C   GLN A  49      -0.808   7.842   5.329  1.00  0.72           C  
ATOM    192  O   GLN A  49      -0.344   8.962   5.539  1.00  0.83           O  
ATOM    193  N   LEU A  50      -0.557   7.241   4.153  1.00  0.69           N  
ATOM    194  CA  LEU A  50       0.432   7.709   3.231  1.00  0.66           C  
ATOM    195  C   LEU A  50      -0.133   8.547   2.136  1.00  0.72           C  
ATOM    196  O   LEU A  50      -1.223   8.314   1.616  1.00  0.90           O  
ATOM    197  N   GLU A  51       0.604   9.581   1.695  1.00  0.70           N  
ATOM    198  CA  GLU A  51       0.244  10.397   0.576  1.00  0.76           C  
ATOM    199  C   GLU A  51       0.683   9.892  -0.756  1.00  0.77           C  
ATOM    200  O   GLU A  51       1.757   9.303  -0.865  1.00  1.23           O  
ATOM    201  N   ASP A  52      -0.050  10.111  -1.861  1.00  0.66           N  
ATOM    202  CA  ASP A  52       0.176   9.588  -3.173  1.00  0.65           C  
ATOM    203  C   ASP A  52       1.497   9.832  -3.818  1.00  0.60           C  
ATOM    204  O   ASP A  52       2.283   8.910  -4.031  1.00  0.62           O  
ATOM    205  N   GLY A  53       1.873  11.088  -4.116  1.00  0.68           N  
ATOM    206  CA  GLY A  53       3.163  11.429  -4.632  1.00  0.73           C  
ATOM    207  C   GLY A  53       4.354  11.656  -3.765  1.00  0.72           C  
ATOM    208  O   GLY A  53       5.363  12.187  -4.227  1.00  0.97           O  
ATOM    209  N   ARG A  54       4.326  11.104  -2.539  1.00  0.64           N  
ATOM    210  CA  ARG A  54       5.412  10.842  -1.647  1.00  0.63           C  
ATOM    211  C   ARG A  54       6.013   9.516  -1.966  1.00  0.59           C  
ATOM    212  O   ARG A  54       5.325   8.651  -2.504  1.00  0.62           O  
ATOM    213  N   THR A  55       7.290   9.301  -1.602  1.00  0.63           N  
ATOM    214  CA  THR A  55       8.002   8.076  -1.794  1.00  0.61           C  
ATOM    215  C   THR A  55       7.967   7.203  -0.587  1.00  0.59           C  
ATOM    216  O   THR A  55       7.907   7.574   0.584  1.00  0.64           O  
ATOM    217  N   LEU A  56       8.180   5.894  -0.812  1.00  0.58           N  
ATOM    218  CA  LEU A  56       8.430   4.942   0.224  1.00  0.59           C  
ATOM    219  C   LEU A  56       9.696   5.238   0.953  1.00  0.64           C  
ATOM    220  O   LEU A  56       9.771   5.091   2.172  1.00  0.70           O  
ATOM    221  N   SER A  57      10.762   5.807   0.363  1.00  0.68           N  
ATOM    222  CA  SER A  57      11.919   6.175   1.118  1.00  0.75           C  
ATOM    223  C   SER A  57      11.681   7.295   2.072  1.00  0.76           C  
ATOM    224  O   SER A  57      12.087   7.212   3.230  1.00  0.84           O  
ATOM    225  N   ASP A  58      10.907   8.310   1.648  1.00  0.75           N  
ATOM    226  CA  ASP A  58      10.408   9.345   2.500  1.00  0.78           C  
ATOM    227  C   ASP A  58       9.802   8.916   3.792  1.00  0.77           C  
ATOM    228  O   ASP A  58      10.097   9.411   4.879  1.00  0.86           O  
ATOM    229  N   TYR A  59       8.822   7.996   3.739  1.00  0.72           N  
ATOM    230  CA  TYR A  59       8.193   7.407   4.879  1.00  0.73           C  
ATOM    231  C   TYR A  59       9.046   6.643   5.833  1.00  0.76           C  
ATOM    232  O   TYR A  59       8.685   6.352   6.973  1.00  0.89           O  
ATOM    233  N   ASN A  60      10.048   5.977   5.231  1.00  0.74           N  
ATOM    234  CA  ASN A  60      11.061   5.179   5.848  1.00  0.79           C  
ATOM    235  C   ASN A  60      10.533   3.786   5.867  1.00  0.75           C  
ATOM    236  O   ASN A  60      10.401   3.154   6.913  1.00  0.86           O  
ATOM    237  N   ILE A  61      10.393   3.256   4.638  1.00  0.67           N  
ATOM    238  CA  ILE A  61       9.972   1.911   4.398  1.00  0.65           C  
ATOM    239  C   ILE A  61      11.123   1.107   3.900  1.00  0.66           C  
ATOM    240  O   ILE A  61      11.788   1.359   2.896  1.00  0.75           O  
ATOM    241  N   GLN A  62      11.393   0.111   4.761  1.00  0.67           N  
ATOM    242  CA  GLN A  62      12.457  -0.803   4.481  1.00  0.70           C  
ATOM    243  C   GLN A  62      11.841  -2.046   3.939  1.00  0.62           C  
ATOM    244  O   GLN A  62      10.649  -2.187   3.670  1.00  0.64           O  
ATOM    245  N   LYS A  63      12.756  -2.986   3.645  1.00  0.64           N  
ATOM    246  CA  LYS A  63      12.285  -4.271   3.231  1.00  0.62           C  
ATOM    247  C   LYS A  63      11.372  -4.986   4.164  1.00  0.59           C  
ATOM    248  O   LYS A  63      11.482  -4.853   5.382  1.00  0.66           O  
ATOM    249  N   GLU A  64      10.458  -5.811   3.620  1.00  0.57           N  
ATOM    250  CA  GLU A  64       9.595  -6.750   4.268  1.00  0.58           C  
ATOM    251  C   GLU A  64       8.635  -6.044   5.164  1.00  0.56           C  
ATOM    252  O   GLU A  64       8.221  -6.593   6.184  1.00  0.70           O  
ATOM    253  N   SER A  65       8.344  -4.774   4.830  1.00  0.51           N  
ATOM    254  CA  SER A  65       7.537  -4.019   5.736  1.00  0.51           C  
ATOM    255  C   SER A  65       6.112  -4.379   5.487  1.00  0.43           C  
ATOM    256  O   SER A  65       5.778  -4.507   4.311  1.00  0.50           O  
ATOM    257  N   THR A  66       5.267  -4.591   6.512  1.00  0.45           N  
ATOM    258  CA  THR A  66       3.934  -5.085   6.368  1.00  0.45           C  
ATOM    259  C   THR A  66       3.146  -3.829   6.518  1.00  0.43           C  
ATOM    260  O   THR A  66       3.011  -3.253   7.596  1.00  0.58           O  
ATOM    261  N   LEU A  67       2.508  -3.429   5.404  1.00  0.38           N  
ATOM    262  CA  LEU A  67       1.670  -2.290   5.190  1.00  0.38           C  
ATOM    263  C   LEU A  67       0.246  -2.727   5.177  1.00  0.37           C  
ATOM    264  O   LEU A  67       0.000  -3.894   4.877  1.00  0.50           O  
ATOM    265  N   HIS A  68      -0.697  -1.811   5.462  1.00  0.35           N  
ATOM    266  CA  HIS A  68      -2.088  -2.116   5.604  1.00  0.37           C  
ATOM    267  C   HIS A  68      -2.851  -1.461   4.505  1.00  0.35           C  
ATOM    268  O   HIS A  68      -2.487  -0.356   4.107  1.00  0.48           O  
ATOM    269  N   LEU A  69      -3.902  -2.142   4.015  1.00  0.36           N  
ATOM    270  CA  LEU A  69      -4.856  -1.785   3.011  1.00  0.38           C  
ATOM    271  C   LEU A  69      -6.253  -1.652   3.513  1.00  0.41           C  
ATOM    272  O   LEU A  69      -6.848  -2.683   3.822  1.00  0.56           O  
ATOM    273  N   VAL A  70      -6.795  -0.422   3.529  1.00  0.45           N  
ATOM    274  CA  VAL A  70      -8.114   0.047   3.821  1.00  0.56           C  
ATOM    275  C   VAL A  70      -8.847   0.390   2.569  1.00  0.55           C  
ATOM    276  O   VAL A  70      -8.345   1.061   1.669  1.00  0.58           O  
TER
ENDMDL
MODEL      3
ATOM      1  N   GLN A   2      11.482  -6.008  -1.191  1.00  0.59           N  
ATOM      2  CA  GLN A   2      10.322  -6.702  -0.725  1.00  0.56           C  
ATOM      3  C   GLN A   2       9.442  -5.985   0.241  1.00  0.50           C  
ATOM      4  O   GLN A   2       9.858  -5.696   1.362  1.00  0.60           O  
ATOM      5  N   ILE A   3       8.141  -5.829  -0.061  1.00  0.44           N  
ATOM      6  CA  ILE A   3       7.219  -5.256   0.868  1.00  0.42           C  
ATOM      7  C   ILE A   3       5.967  -6.061   0.796  1.00  0.40           C  
ATOM      8  O   ILE A   3       5.678  -6.680  -0.226  1.00  0.50           O  
ATOM      9  N   PHE A   4       5.227  -6.090   1.920  1.00  0.37           N  
ATOM     10  CA  PHE A   4       3.998  -6.781   2.151  1.00  0.38           C  
ATOM     11  C   PHE A   4       2.847  -5.839   2.240  1.00  0.39           C  
ATOM     12  O   PHE A   4       2.953  -4.718   2.735  1.00  0.60           O  
ATOM     13  N   VAL A   5       1.670  -6.188   1.690  1.00  0.35           N  
ATOM     14  CA  VAL A   5       0.481  -5.417   1.882  1.00  0.35           C  
ATOM     15  C   VAL A   5      -0.546  -6.305   2.496  1.00  0.35           C  
ATOM     16  O   VAL A   5      -0.723  -7.363   1.895  1.00  0.46           O  
ATOM     17  N   LYS A   6      -1.249  -6.006   3.603  1.00  0.36           N  
ATOM     18  CA  LYS A   6      -2.264  -6.932   4.000  1.00  0.39           C  
ATOM     19  C   LYS A   6      -3.607  -6.287   4.036  1.00  0.46           C  
ATOM     20  O   LYS A   6      -3.782  -5.183   4.549  1.00  0.53           O  
ATOM     21  N   THR A   7      -4.630  -6.941   3.457  1.00  0.58           N  
ATOM     22  CA  THR A   7      -5.952  -6.397   3.480  1.00  0.78           C  
ATOM     23  C   THR A   7      -6.560  -6.446   4.840  1.00  0.94           C  
ATOM     24  O   THR A   7      -5.994  -7.047   5.752  1.00  0.99           O  
ATOM     25  N   LEU A   8      -7.766  -5.881   5.028  1.00  1.17           N  
ATOM     26  CA  LEU A   8      -8.591  -6.017   6.189  1.00  1.39           C  
ATOM     27  C   LEU A   8      -9.111  -7.390   6.440  1.00  1.44           C  
ATOM     28  O   LEU A   8      -9.244  -7.813   7.588  1.00  1.60           O  
ATOM     29  N   THR A   9      -9.547  -8.076   5.369  1.00  1.41           N  
ATOM     30  CA  THR A   9     -10.095  -9.393   5.465  1.00  1.51           C  
ATOM     31  C   THR A   9      -9.010 -10.318   5.896  1.00  1.37           C  
ATOM     32  O   THR A   9      -9.098 -11.033   6.894  1.00  1.62           O  
ATOM     33  N   GLY A  10      -7.822 -10.253   5.270  1.00  1.18           N  
ATOM     34  CA  GLY A  10      -6.608 -10.897   5.666  1.00  1.22           C  
ATOM     35  C   GLY A  10      -5.862 -11.529   4.542  1.00  0.99           C  
ATOM     36  O   GLY A  10      -5.369 -12.650   4.646  1.00  1.31           O  
ATOM     37  N   LYS A  11      -5.760 -10.840   3.391  1.00  0.73           N  
ATOM     38  CA  LYS A  11      -5.100 -11.309   2.213  1.00  0.60           C  
ATOM     39  C   LYS A  11      -3.723 -10.739   2.198  1.00  0.51           C  
ATOM     40  O   LYS A  11      -3.657  -9.512   2.196  1.00  0.63           O  
ATOM     41  N   THR A  12      -2.622 -11.512   2.243  1.00  0.49           N  
ATOM     42  CA  THR A  12      -1.330 -10.921   2.077  1.00  0.48           C  
ATOM     43  C   THR A  12      -0.860 -10.921   0.663  1.00  0.52           C  
ATOM     44  O   THR A  12      -0.801 -11.954  -0.003  1.00  0.72           O  
ATOM     45  N   ILE A  13      -0.497  -9.722   0.174  1.00  0.48           N  
ATOM     46  CA  ILE A  13      -0.092  -9.508  -1.180  1.00  0.55           C  
ATOM     47  C   ILE A  13       1.343  -9.160  -0.983  1.00  0.51           C  
ATOM     48  O   ILE A  13       1.777  -8.217  -0.323  1.00  0.56           O  
ATOM     49  N   THR A  14       2.185  -9.912  -1.715  1.00  0.55           N  
ATOM     50  CA  THR A  14       3.592  -9.662  -1.727  1.00  0.54           C  
ATOM     51  C   THR A  14       4.001  -8.930  -2.958  1.00  0.55           C  
ATOM     52  O   THR A  14       3.717  -9.413  -4.053  1.00  0.72           O  
ATOM     53  N   LEU A  15       4.684  -7.780  -2.809  1.00  0.50           N  
ATOM     54  CA  LEU A  15       5.077  -6.997  -3.939  1.00  0.55           C  
ATOM     55  C   LEU A  15       6.546  -6.777  -3.829  1.00  0.52           C  
ATOM     56  O   LEU A  15       7.206  -6.981  -2.811  1.00  0.58           O  
ATOM     57  N   GLU A  16       7.091  -6.454  -5.015  1.00  0.59           N  
ATOM     58  CA  GLU A  16       8.440  -6.004  -5.167  1.00  0.63           C  
ATOM     59  C   GLU A  16       8.309  -4.640  -5.753  1.00  0.65           C  
ATOM     60  O   GLU A  16       7.507  -4.392  -6.652  1.00  0.81           O  
ATOM     61  N   VAL A  17       9.119  -3.670  -5.289  1.00  0.61           N  
ATOM     62  CA  VAL A  17       9.090  -2.292  -5.667  1.00  0.63           C  
ATOM     63  C   VAL A  17      10.516  -1.861  -5.636  1.00  0.65           C  
ATOM     64  O   VAL A  17      11.364  -2.555  -5.079  1.00  0.76           O  
ATOM     65  N   GLU A  18      10.745  -0.700  -6.276  1.00  0.68           N  
ATOM     66  CA  GLU A  18      11.945   0.013  -5.967  1.00  0.74           C  
ATOM     67  C   GLU A  18      11.588   1.084  -4.995  1.00  0.71           C  
ATOM     68  O   GLU A  18      10.497   1.631  -5.147  1.00  0.74           O  
ATOM     69  N   PRO A  19      12.384   1.465  -4.040  1.00  0.74           N  
ATOM     70  CA  PRO A  19      11.903   2.342  -3.013  1.00  0.74           C  
ATOM     71  C   PRO A  19      11.680   3.725  -3.519  1.00  0.70           C  
ATOM     72  O   PRO A  19      11.163   4.504  -2.718  1.00  0.74           O  
ATOM     73  N   SER A  20      12.140   4.206  -4.687  1.00  0.70           N  
ATOM     74  CA  SER A  20      11.942   5.507  -5.248  1.00  0.74           C  
ATOM     75  C   SER A  20      10.682   5.552  -6.041  1.00  0.71           C  
ATOM     76  O   SER A  20      10.183   6.592  -6.471  1.00  0.80           O  
ATOM     77  N   ASP A  21      10.039   4.387  -6.240  1.00  0.70           N  
ATOM     78  CA  ASP A  21       8.766   4.340  -6.889  1.00  0.73           C  
ATOM     79  C   ASP A  21       7.669   4.820  -6.001  1.00  0.64           C  
ATOM     80  O   ASP A  21       7.742   4.779  -4.774  1.00  0.66           O  
ATOM     81  N   THR A  22       6.573   5.386  -6.536  1.00  0.63           N  
ATOM     82  CA  THR A  22       5.541   6.004  -5.761  1.00  0.58           C  
ATOM     83  C   THR A  22       4.620   5.102  -5.016  1.00  0.53           C  
ATOM     84  O   THR A  22       4.652   3.889  -5.222  1.00  0.58           O  
ATOM     85  N   ILE A  23       3.779   5.658  -4.126  1.00  0.51           N  
ATOM     86  CA  ILE A  23       2.753   4.936  -3.439  1.00  0.48           C  
ATOM     87  C   ILE A  23       1.681   4.783  -4.463  1.00  0.48           C  
ATOM     88  O   ILE A  23       1.164   3.669  -4.525  1.00  0.51           O  
ATOM     89  N   GLU A  24       1.428   5.794  -5.312  1.00  0.50           N  
ATOM     90  CA  GLU A  24       0.739   5.745  -6.565  1.00  0.53           C  
ATOM     91  C   GLU A  24       1.106   4.565  -7.397  1.00  0.50           C  
ATOM     92  O   GLU A  24       0.256   3.786  -7.825  1.00  0.55           O  
ATOM     93  N   ASN A  25       2.411   4.355  -7.642  1.00  0.51           N  
ATOM     94  CA  ASN A  25       2.949   3.225  -8.335  1.00  0.52           C  
ATOM     95  C   ASN A  25       2.629   1.933  -7.667  1.00  0.47           C  
ATOM     96  O   ASN A  25       2.191   0.977  -8.306  1.00  0.53           O  
ATOM     97  N   VAL A  26       2.769   1.855  -6.331  1.00  0.45           N  
ATOM     98  CA  VAL A  26       2.430   0.692  -5.571  1.00  0.44           C  
ATOM     99  C   VAL A  26       0.966   0.422  -5.647  1.00  0.40           C  
ATOM    100  O   VAL A  26       0.591  -0.741  -5.783  1.00  0.44           O  
ATOM    101  N   LYS A  27       0.079   1.427  -5.543  1.00  0.40           N  
ATOM    102  CA  LYS A  27      -1.335   1.340  -5.742  1.00  0.41           C  
ATOM    103  C   LYS A  27      -1.708   0.852  -7.098  1.00  0.38           C  
ATOM    104  O   LYS A  27      -2.650   0.083  -7.285  1.00  0.42           O  
ATOM    105  N   ALA A  28      -1.038   1.279  -8.184  1.00  0.39           N  
ATOM    106  CA  ALA A  28      -1.218   0.864  -9.541  1.00  0.39           C  
ATOM    107  C   ALA A  28      -0.918  -0.589  -9.680  1.00  0.36           C  
ATOM    108  O   ALA A  28      -1.561  -1.306 -10.447  1.00  0.42           O  
ATOM    109  N   LYS A  29       0.089  -1.110  -8.957  1.00  0.39           N  
ATOM    110  CA  LYS A  29       0.406  -2.504  -8.927  1.00  0.43           C  
ATOM    111  C   LYS A  29      -0.584  -3.416  -8.287  1.00  0.44           C  
ATOM    112  O   LYS A  29      -0.832  -4.491  -8.831  1.00  0.54           O  
ATOM    113  N   ILE A  30      -1.186  -2.981  -7.167  1.00  0.41           N  
ATOM    114  CA  ILE A  30      -2.307  -3.658  -6.591  1.00  0.44           C  
ATOM    115  C   ILE A  30      -3.499  -3.690  -7.483  1.00  0.45           C  
ATOM    116  O   ILE A  30      -4.174  -4.674  -7.784  1.00  0.56           O  
ATOM    117  N   GLN A  31      -3.899  -2.552  -8.077  1.00  0.41           N  
ATOM    118  CA  GLN A  31      -4.852  -2.457  -9.139  1.00  0.48           C  
ATOM    119  C   GLN A  31      -4.640  -3.389 -10.282  1.00  0.52           C  
ATOM    120  O   GLN A  31      -5.548  -3.937 -10.906  1.00  0.66           O  
ATOM    121  N   ASP A  32      -3.377  -3.605 -10.690  1.00  0.50           N  
ATOM    122  CA  ASP A  32      -3.061  -4.586 -11.681  1.00  0.60           C  
ATOM    123  C   ASP A  32      -3.468  -5.966 -11.294  1.00  0.65           C  
ATOM    124  O   ASP A  32      -3.933  -6.716 -12.150  1.00  0.81           O  
ATOM    125  N   LYS A  33      -3.202  -6.406 -10.051  1.00  0.62           N  
ATOM    126  CA  LYS A  33      -3.477  -7.735  -9.597  1.00  0.73           C  
ATOM    127  C   LYS A  33      -4.912  -7.783  -9.200  1.00  0.69           C  
ATOM    128  O   LYS A  33      -5.742  -8.379  -9.887  1.00  0.83           O  
ATOM    129  N   GLU A  34      -5.319  -7.371  -7.987  1.00  0.63           N  
ATOM    130  CA  GLU A  34      -6.586  -7.605  -7.366  1.00  0.67           C  
ATOM    131  C   GLU A  34      -7.699  -6.763  -7.888  1.00  0.69           C  
ATOM    132  O   GLU A  34      -8.865  -7.144  -7.978  1.00  0.95           O  
ATOM    133  N   GLY A  35      -7.327  -5.567  -8.379  1.00  0.63           N  
ATOM    134  CA  GLY A  35      -8.254  -4.787  -9.141  1.00  0.68           C  
ATOM    135  C   GLY A  35      -8.631  -3.516  -8.461  1.00  0.76           C  
ATOM    136  O   GLY A  35      -9.298  -2.677  -9.063  1.00  1.12           O  
ATOM    137  N   ILE A  36      -8.199  -3.371  -7.195  1.00  0.70           N  
ATOM    138  CA  ILE A  36      -8.520  -2.278  -6.331  1.00  0.76           C  
ATOM    139  C   ILE A  36      -8.072  -0.922  -6.760  1.00  0.71           C  
ATOM    140  O   ILE A  36      -6.882  -0.613  -6.782  1.00  0.73           O  
ATOM    141  N   PRO A  37      -8.961  -0.017  -7.043  1.00  0.75           N  
ATOM    142  CA  PRO A  37      -8.459   1.256  -7.471  1.00  0.79           C  
ATOM    143  C   PRO A  37      -7.720   2.117  -6.506  1.00  0.75           C  
ATOM    144  O   PRO A  37      -8.074   2.128  -5.327  1.00  0.75           O  
ATOM    145  N   PRO A  38      -6.766   2.923  -6.866  1.00  0.81           N  
ATOM    146  CA  PRO A  38      -5.922   3.673  -5.983  1.00  0.85           C  
ATOM    147  C   PRO A  38      -6.675   4.645  -5.141  1.00  0.89           C  
ATOM    148  O   PRO A  38      -6.226   4.773  -4.004  1.00  0.99           O  
ATOM    149  N   ASP A  39      -7.780   5.249  -5.615  1.00  0.96           N  
ATOM    150  CA  ASP A  39      -8.655   6.062  -4.828  1.00  1.11           C  
ATOM    151  C   ASP A  39      -9.330   5.375  -3.692  1.00  1.00           C  
ATOM    152  O   ASP A  39      -9.548   5.931  -2.617  1.00  1.14           O  
ATOM    153  N   GLN A  40      -9.592   4.067  -3.869  1.00  0.87           N  
ATOM    154  CA  GLN A  40     -10.231   3.206  -2.922  1.00  0.84           C  
ATOM    155  C   GLN A  40      -9.260   2.618  -1.956  1.00  0.67           C  
ATOM    156  O   GLN A  40      -9.599   2.341  -0.808  1.00  0.80           O  
ATOM    157  N   GLN A  41      -7.975   2.512  -2.339  1.00  0.56           N  
ATOM    158  CA  GLN A  41      -6.933   1.904  -1.570  1.00  0.51           C  
ATOM    159  C   GLN A  41      -6.514   2.965  -0.612  1.00  0.49           C  
ATOM    160  O   GLN A  41      -5.989   4.018  -0.974  1.00  0.65           O  
ATOM    161  N   ARG A  42      -6.673   2.731   0.703  1.00  0.47           N  
ATOM    162  CA  ARG A  42      -6.142   3.531   1.762  1.00  0.55           C  
ATOM    163  C   ARG A  42      -5.069   2.680   2.348  1.00  0.46           C  
ATOM    164  O   ARG A  42      -5.270   1.578   2.856  1.00  0.52           O  
ATOM    165  N   LEU A  43      -3.855   3.257   2.403  1.00  0.46           N  
ATOM    166  CA  LEU A  43      -2.699   2.512   2.796  1.00  0.42           C  
ATOM    167  C   LEU A  43      -2.166   3.182   4.016  1.00  0.43           C  
ATOM    168  O   LEU A  43      -1.846   4.370   4.023  1.00  0.55           O  
ATOM    169  N   ILE A  44      -2.019   2.378   5.083  1.00  0.42           N  
ATOM    170  CA  ILE A  44      -1.502   2.716   6.374  1.00  0.46           C  
ATOM    171  C   ILE A  44      -0.223   2.042   6.733  1.00  0.42           C  
ATOM    172  O   ILE A  44      -0.168   0.814   6.786  1.00  0.53           O  
ATOM    173  N   PHE A  45       0.858   2.814   6.941  1.00  0.42           N  
ATOM    174  CA  PHE A  45       2.101   2.304   7.430  1.00  0.46           C  
ATOM    175  C   PHE A  45       2.196   2.671   8.871  1.00  0.68           C  
ATOM    176  O   PHE A  45       2.249   3.859   9.190  1.00  1.50           O  
ATOM    177  N   ALA A  46       2.067   1.734   9.826  1.00  0.81           N  
ATOM    178  CA  ALA A  46       2.156   2.007  11.227  1.00  0.96           C  
ATOM    179  C   ALA A  46       0.989   2.820  11.673  1.00  0.97           C  
ATOM    180  O   ALA A  46      -0.131   2.356  11.880  1.00  1.21           O  
ATOM    181  N   GLY A  47       1.218   4.141  11.783  1.00  0.99           N  
ATOM    182  CA  GLY A  47       0.194   5.095  12.075  1.00  1.10           C  
ATOM    183  C   GLY A  47       0.197   6.264  11.150  1.00  1.03           C  
ATOM    184  O   GLY A  47      -0.137   7.410  11.449  1.00  1.30           O  
ATOM    185  N   LYS A  48       0.629   5.999   9.905  1.00  0.98           N  
ATOM    186  CA  LYS A  48       0.655   6.962   8.847  1.00  1.05           C  
ATOM    187  C   LYS A  48      -0.211   6.559   7.704  1.00  0.84           C  
ATOM    188  O   LYS A  48      -0.053   5.424   7.255  1.00  0.81           O  
ATOM    189  N   GLN A  49      -1.089   7.429   7.176  1.00  0.84           N  
ATOM    190  CA  GLN A  49      -1.855   7.226   5.985  1.00  0.80           C  
ATOM    191  C   GLN A  49      -1.150   7.867   4.840  1.00  0.72           C  
ATOM    192  O   GLN A  49      -0.955   9.078   4.763  1.00  0.83           O  
ATOM    193  N   LEU A  50      -0.673   7.091   3.850  1.00  0.69           N  
ATOM    194  CA  LEU A  50       0.252   7.463   2.825  1.00  0.66           C  
ATOM    195  C   LEU A  50      -0.436   8.142   1.692  1.00  0.72           C  
ATOM    196  O   LEU A  50      -1.518   7.813   1.207  1.00  0.90           O  
ATOM    197  N   GLU A  51       0.234   9.200   1.202  1.00  0.70           N  
ATOM    198  CA  GLU A  51      -0.157   9.956   0.053  1.00  0.76           C  
ATOM    199  C   GLU A  51       0.510   9.378  -1.149  1.00  0.77           C  
ATOM    200  O   GLU A  51       1.656   8.933  -1.125  1.00  1.23           O  
ATOM    201  N   ASP A  52      -0.259   9.295  -2.249  1.00  0.66           N  
ATOM    202  CA  ASP A  52       0.051   8.672  -3.499  1.00  0.65           C  
ATOM    203  C   ASP A  52       1.276   9.176  -4.182  1.00  0.60           C  
ATOM    204  O   ASP A  52       2.115   8.418  -4.665  1.00  0.62           O  
ATOM    205  N   GLY A  53       1.371  10.516  -4.236  1.00  0.68           N  
ATOM    206  CA  GLY A  53       2.458  11.289  -4.753  1.00  0.73           C  
ATOM    207  C   GLY A  53       3.754  11.356  -4.021  1.00  0.72           C  
ATOM    208  O   GLY A  53       4.737  11.928  -4.489  1.00  0.97           O  
ATOM    209  N   ARG A  54       3.896  10.781  -2.814  1.00  0.64           N  
ATOM    210  CA  ARG A  54       5.162  10.490  -2.216  1.00  0.63           C  
ATOM    211  C   ARG A  54       5.646   9.135  -2.606  1.00  0.59           C  
ATOM    212  O   ARG A  54       5.000   8.350  -3.298  1.00  0.62           O  
ATOM    213  N   THR A  55       6.918   8.853  -2.271  1.00  0.63           N  
ATOM    214  CA  THR A  55       7.510   7.554  -2.354  1.00  0.61           C  
ATOM    215  C   THR A  55       7.457   6.717  -1.122  1.00  0.59           C  
ATOM    216  O   THR A  55       7.086   7.130  -0.024  1.00  0.64           O  
ATOM    217  N   LEU A  56       7.850   5.440  -1.271  1.00  0.58           N  
ATOM    218  CA  LEU A  56       8.161   4.556  -0.191  1.00  0.59           C  
ATOM    219  C   LEU A  56       9.265   5.044   0.680  1.00  0.64           C  
ATOM    220  O   LEU A  56       9.113   4.871   1.889  1.00  0.70           O  
ATOM    221  N   SER A  57      10.349   5.590   0.099  1.00  0.68           N  
ATOM    222  CA  SER A  57      11.511   6.057   0.789  1.00  0.75           C  
ATOM    223  C   SER A  57      11.220   7.193   1.710  1.00  0.76           C  
ATOM    224  O   SER A  57      11.820   7.232   2.783  1.00  0.84           O  
ATOM    225  N   ASP A  58      10.313   8.128   1.378  1.00  0.75           N  
ATOM    226  CA  ASP A  58       9.892   9.159   2.274  1.00  0.78           C  
ATOM    227  C   ASP A  58       9.316   8.749   3.586  1.00  0.77           C  
ATOM    228  O   ASP A  58       9.568   9.463   4.556  1.00  0.86           O  
ATOM    229  N   TYR A  59       8.563   7.639   3.683  1.00  0.72           N  
ATOM    230  CA  TYR A  59       7.965   7.136   4.882  1.00  0.73           C  
ATOM    231  C   TYR A  59       8.889   6.183   5.557  1.00  0.76           C  
ATOM    232  O   TYR A  59       8.508   5.691   6.617  1.00  0.89           O  
ATOM    233  N   ASN A  60      10.095   5.878   5.044  1.00  0.74           N  
ATOM    234  CA  ASN A  60      11.038   4.970   5.618  1.00  0.79           C  
ATOM    235  C   ASN A  60      10.567   3.557   5.587  1.00  0.75           C  
ATOM    236  O   ASN A  60      10.948   2.807   6.483  1.00  0.86           O  
ATOM    237  N   ILE A  61       9.687   3.158   4.651  1.00  0.67           N  
ATOM    238  CA  ILE A  61       9.133   1.856   4.447  1.00  0.65           C  
ATOM    239  C   ILE A  61      10.255   0.994   3.978  1.00  0.66           C  
ATOM    240  O   ILE A  61      11.029   1.383   3.105  1.00  0.75           O  
ATOM    241  N   GLN A  62      10.576  -0.125   4.652  1.00  0.67           N  
ATOM    242  CA  GLN A  62      11.754  -0.863   4.317  1.00  0.70           C  
ATOM    243  C   GLN A  62      11.329  -2.261   4.029  1.00  0.62           C  
ATOM    244  O   GLN A  62      10.120  -2.488   4.036  1.00  0.64           O  
ATOM    245  N   LYS A  63      12.291  -3.194   3.914  1.00  0.64           N  
ATOM    246  CA  LYS A  63      12.192  -4.607   3.719  1.00  0.62           C  
ATOM    247  C   LYS A  63      11.318  -5.263   4.731  1.00  0.59           C  
ATOM    248  O   LYS A  63      11.456  -5.012   5.927  1.00  0.66           O  
ATOM    249  N   GLU A  64      10.441  -6.158   4.243  1.00  0.57           N  
ATOM    250  CA  GLU A  64       9.453  -6.925   4.935  1.00  0.58           C  
ATOM    251  C   GLU A  64       8.375  -6.106   5.557  1.00  0.56           C  
ATOM    252  O   GLU A  64       7.682  -6.550   6.470  1.00  0.70           O  
ATOM    253  N   SER A  65       8.184  -4.823   5.199  1.00  0.51           N  
ATOM    254  CA  SER A  65       7.271  -3.928   5.841  1.00  0.51           C  
ATOM    255  C   SER A  65       5.884  -4.312   5.455  1.00  0.43           C  
ATOM    256  O   SER A  65       5.686  -4.657   4.291  1.00  0.50           O  
ATOM    257  N   THR A  66       4.998  -4.267   6.466  1.00  0.45           N  
ATOM    258  CA  THR A  66       3.637  -4.629   6.224  1.00  0.45           C  
ATOM    259  C   THR A  66       2.675  -3.490   6.264  1.00  0.43           C  
ATOM    260  O   THR A  66       2.294  -2.979   7.316  1.00  0.58           O  
ATOM    261  N   LEU A  67       2.378  -3.029   5.037  1.00  0.38           N  
ATOM    262  CA  LEU A  67       1.469  -1.946   4.816  1.00  0.38           C  
ATOM    263  C   LEU A  67       0.070  -2.413   5.027  1.00  0.37           C  
ATOM    264  O   LEU A  67      -0.256  -3.564   4.742  1.00  0.50           O  
ATOM    265  N   HIS A  68      -0.872  -1.573   5.491  1.00  0.35           N  
ATOM    266  CA  HIS A  68      -2.203  -1.987   5.808  1.00  0.37           C  
ATOM    267  C   HIS A  68      -3.156  -1.374   4.841  1.00  0.35           C  
ATOM    268  O   HIS A  68      -3.303  -0.155   4.760  1.00  0.48           O  
ATOM    269  N   LEU A  69      -3.821  -2.223   4.038  1.00  0.36           N  
ATOM    270  CA  LEU A  69      -4.749  -1.849   3.017  1.00  0.38           C  
ATOM    271  C   LEU A  69      -6.168  -2.024   3.436  1.00  0.41           C  
ATOM    272  O   LEU A  69      -6.717  -3.121   3.532  1.00  0.56           O  
ATOM    273  N   VAL A  70      -6.849  -0.869   3.539  1.00  0.45           N  
ATOM    274  CA  VAL A  70      -8.257  -0.844   3.785  1.00  0.56           C  
ATOM    275  C   VAL A  70      -9.033  -0.424   2.585  1.00  0.55           C  
ATOM    276  O   VAL A  70      -8.655   0.503   1.870  1.00  0.58           O  
TER
ENDMDL
MODEL      4
ATOM      1  N   GLN A   2      11.029  -6.043  -0.835  1.00  0.59           N  
ATOM      2  CA  GLN A   2       9.714  -6.604  -0.823  1.00  0.56           C  
ATOM      3  C   GLN A   2       8.942  -6.065   0.331  1.00  0.50           C  
ATOM      4  O   GLN A   2       9.368  -5.839   1.463  1.00  0.60           O  
ATOM      5  N   ILE A   3       7.698  -5.654   0.031  1.00  0.44           N  
ATOM      6  CA  ILE A   3       6.772  -5.187   1.016  1.00  0.42           C  
ATOM      7  C   ILE A   3       5.565  -6.049   0.881  1.00  0.40           C  
ATOM      8  O   ILE A   3       5.282  -6.614  -0.174  1.00  0.50           O  
ATOM      9  N   PHE A   4       4.809  -6.145   1.990  1.00  0.37           N  
ATOM     10  CA  PHE A   4       3.665  -6.995   2.101  1.00  0.38           C  
ATOM     11  C   PHE A   4       2.447  -6.186   2.390  1.00  0.39           C  
ATOM     12  O   PHE A   4       2.290  -5.521   3.413  1.00  0.60           O  
ATOM     13  N   VAL A   5       1.414  -6.327   1.540  1.00  0.35           N  
ATOM     14  CA  VAL A   5       0.136  -5.725   1.759  1.00  0.35           C  
ATOM     15  C   VAL A   5      -0.903  -6.643   2.305  1.00  0.35           C  
ATOM     16  O   VAL A   5      -1.630  -7.399   1.663  1.00  0.46           O  
ATOM     17  N   LYS A   6      -1.030  -6.590   3.642  1.00  0.36           N  
ATOM     18  CA  LYS A   6      -2.015  -7.364   4.333  1.00  0.39           C  
ATOM     19  C   LYS A   6      -3.361  -6.755   4.137  1.00  0.46           C  
ATOM     20  O   LYS A   6      -3.576  -5.593   4.477  1.00  0.53           O  
ATOM     21  N   THR A   7      -4.322  -7.545   3.626  1.00  0.58           N  
ATOM     22  CA  THR A   7      -5.634  -7.068   3.312  1.00  0.78           C  
ATOM     23  C   THR A   7      -6.640  -7.405   4.358  1.00  0.94           C  
ATOM     24  O   THR A   7      -6.342  -8.125   5.309  1.00  0.99           O  
ATOM     25  N   LEU A   8      -7.917  -7.001   4.238  1.00  1.17           N  
ATOM     26  CA  LEU A   8      -9.020  -7.330   5.088  1.00  1.39           C  
ATOM     27  C   LEU A   8      -9.357  -8.781   5.064  1.00  1.44           C  
ATOM     28  O   LEU A   8      -9.305  -9.471   6.081  1.00  1.60           O  
ATOM     29  N   THR A   9      -9.798  -9.352   3.929  1.00  1.41           N  
ATOM     30  CA  THR A   9     -10.242 -10.708   3.828  1.00  1.51           C  
ATOM     31  C   THR A   9      -9.282 -11.816   4.093  1.00  1.37           C  
ATOM     32  O   THR A   9      -9.626 -12.871   4.624  1.00  1.62           O  
ATOM     33  N   GLY A  10      -8.028 -11.588   3.662  1.00  1.18           N  
ATOM     34  CA  GLY A  10      -7.107 -12.659   3.887  1.00  1.22           C  
ATOM     35  C   GLY A  10      -5.746 -12.426   3.325  1.00  0.99           C  
ATOM     36  O   GLY A  10      -4.710 -12.554   3.973  1.00  1.31           O  
ATOM     37  N   LYS A  11      -5.685 -12.090   2.025  1.00  0.73           N  
ATOM     38  CA  LYS A  11      -4.459 -12.073   1.288  1.00  0.60           C  
ATOM     39  C   LYS A  11      -3.404 -11.142   1.778  1.00  0.51           C  
ATOM     40  O   LYS A  11      -3.609  -9.990   2.159  1.00  0.63           O  
ATOM     41  N   THR A  12      -2.153 -11.617   1.911  1.00  0.49           N  
ATOM     42  CA  THR A  12      -0.981 -10.831   2.139  1.00  0.48           C  
ATOM     43  C   THR A  12      -0.345 -10.711   0.798  1.00  0.52           C  
ATOM     44  O   THR A  12       0.104 -11.720   0.255  1.00  0.72           O  
ATOM     45  N   ILE A  13      -0.310  -9.494   0.224  1.00  0.48           N  
ATOM     46  CA  ILE A  13       0.165  -9.344  -1.117  1.00  0.55           C  
ATOM     47  C   ILE A  13       1.631  -9.080  -1.137  1.00  0.51           C  
ATOM     48  O   ILE A  13       2.101  -8.076  -0.606  1.00  0.56           O  
ATOM     49  N   THR A  14       2.457  -9.931  -1.770  1.00  0.55           N  
ATOM     50  CA  THR A  14       3.862  -9.709  -1.919  1.00  0.54           C  
ATOM     51  C   THR A  14       4.075  -8.869  -3.131  1.00  0.55           C  
ATOM     52  O   THR A  14       3.800  -9.331  -4.237  1.00  0.72           O  
ATOM     53  N   LEU A  15       4.530  -7.625  -2.899  1.00  0.50           N  
ATOM     54  CA  LEU A  15       4.898  -6.685  -3.913  1.00  0.55           C  
ATOM     55  C   LEU A  15       6.345  -6.331  -3.872  1.00  0.52           C  
ATOM     56  O   LEU A  15       6.821  -5.664  -2.954  1.00  0.58           O  
ATOM     57  N   GLU A  16       7.172  -6.627  -4.890  1.00  0.59           N  
ATOM     58  CA  GLU A  16       8.478  -6.048  -4.955  1.00  0.63           C  
ATOM     59  C   GLU A  16       8.558  -4.699  -5.581  1.00  0.65           C  
ATOM     60  O   GLU A  16       8.180  -4.482  -6.732  1.00  0.81           O  
ATOM     61  N   VAL A  17       9.122  -3.763  -4.797  1.00  0.61           N  
ATOM     62  CA  VAL A  17       9.220  -2.377  -5.135  1.00  0.63           C  
ATOM     63  C   VAL A  17      10.629  -1.929  -4.956  1.00  0.65           C  
ATOM     64  O   VAL A  17      11.471  -2.472  -4.243  1.00  0.76           O  
ATOM     65  N   GLU A  18      11.037  -0.781  -5.525  1.00  0.68           N  
ATOM     66  CA  GLU A  18      12.247  -0.101  -5.176  1.00  0.74           C  
ATOM     67  C   GLU A  18      11.823   0.963  -4.222  1.00  0.71           C  
ATOM     68  O   GLU A  18      10.738   1.533  -4.323  1.00  0.74           O  
ATOM     69  N   PRO A  19      12.596   1.446  -3.296  1.00  0.74           N  
ATOM     70  CA  PRO A  19      12.245   2.503  -2.392  1.00  0.74           C  
ATOM     71  C   PRO A  19      12.164   3.916  -2.858  1.00  0.70           C  
ATOM     72  O   PRO A  19      11.727   4.775  -2.093  1.00  0.74           O  
ATOM     73  N   SER A  20      12.476   4.251  -4.122  1.00  0.70           N  
ATOM     74  CA  SER A  20      12.281   5.539  -4.713  1.00  0.74           C  
ATOM     75  C   SER A  20      11.008   5.536  -5.487  1.00  0.71           C  
ATOM     76  O   SER A  20      10.576   6.581  -5.969  1.00  0.80           O  
ATOM     77  N   ASP A  21      10.287   4.410  -5.632  1.00  0.70           N  
ATOM     78  CA  ASP A  21       8.996   4.362  -6.246  1.00  0.73           C  
ATOM     79  C   ASP A  21       7.963   4.991  -5.376  1.00  0.64           C  
ATOM     80  O   ASP A  21       8.089   4.962  -4.152  1.00  0.66           O  
ATOM     81  N   THR A  22       6.961   5.638  -5.996  1.00  0.63           N  
ATOM     82  CA  THR A  22       5.865   6.316  -5.377  1.00  0.58           C  
ATOM     83  C   THR A  22       4.714   5.512  -4.879  1.00  0.53           C  
ATOM     84  O   THR A  22       4.501   4.418  -5.400  1.00  0.58           O  
ATOM     85  N   ILE A  23       3.918   5.947  -3.887  1.00  0.51           N  
ATOM     86  CA  ILE A  23       2.761   5.215  -3.474  1.00  0.48           C  
ATOM     87  C   ILE A  23       1.788   4.985  -4.580  1.00  0.48           C  
ATOM     88  O   ILE A  23       1.278   3.871  -4.685  1.00  0.51           O  
ATOM     89  N   GLU A  24       1.618   5.972  -5.476  1.00  0.50           N  
ATOM     90  CA  GLU A  24       0.974   5.827  -6.745  1.00  0.53           C  
ATOM     91  C   GLU A  24       1.192   4.586  -7.541  1.00  0.50           C  
ATOM     92  O   GLU A  24       0.250   3.921  -7.970  1.00  0.55           O  
ATOM     93  N   ASN A  25       2.483   4.265  -7.741  1.00  0.51           N  
ATOM     94  CA  ASN A  25       2.963   3.060  -8.344  1.00  0.52           C  
ATOM     95  C   ASN A  25       2.530   1.787  -7.703  1.00  0.47           C  
ATOM     96  O   ASN A  25       2.064   0.867  -8.372  1.00  0.53           O  
ATOM     97  N   VAL A  26       2.602   1.735  -6.361  1.00  0.45           N  
ATOM     98  CA  VAL A  26       2.162   0.652  -5.536  1.00  0.44           C  
ATOM     99  C   VAL A  26       0.717   0.310  -5.656  1.00  0.40           C  
ATOM    100  O   VAL A  26       0.279  -0.819  -5.866  1.00  0.44           O  
ATOM    101  N   LYS A  27      -0.112   1.369  -5.685  1.00  0.40           N  
ATOM    102  CA  LYS A  27      -1.520   1.377  -5.935  1.00  0.41           C  
ATOM    103  C   LYS A  27      -1.759   0.862  -7.313  1.00  0.38           C  
ATOM    104  O   LYS A  27      -2.631   0.023  -7.534  1.00  0.42           O  
ATOM    105  N   ALA A  28      -1.009   1.314  -8.333  1.00  0.39           N  
ATOM    106  CA  ALA A  28      -1.077   0.750  -9.646  1.00  0.39           C  
ATOM    107  C   ALA A  28      -0.735  -0.689  -9.823  1.00  0.36           C  
ATOM    108  O   ALA A  28      -1.248  -1.413 -10.675  1.00  0.42           O  
ATOM    109  N   LYS A  29       0.165  -1.272  -9.011  1.00  0.39           N  
ATOM    110  CA  LYS A  29       0.443  -2.675  -9.002  1.00  0.43           C  
ATOM    111  C   LYS A  29      -0.630  -3.317  -8.192  1.00  0.44           C  
ATOM    112  O   LYS A  29      -0.919  -4.492  -8.415  1.00  0.54           O  
ATOM    113  N   ILE A  30      -1.283  -2.720  -7.178  1.00  0.41           N  
ATOM    114  CA  ILE A  30      -2.386  -3.302  -6.479  1.00  0.44           C  
ATOM    115  C   ILE A  30      -3.633  -3.327  -7.295  1.00  0.45           C  
ATOM    116  O   ILE A  30      -4.463  -4.235  -7.310  1.00  0.56           O  
ATOM    117  N   GLN A  31      -3.838  -2.302  -8.140  1.00  0.41           N  
ATOM    118  CA  GLN A  31      -4.726  -2.213  -9.258  1.00  0.48           C  
ATOM    119  C   GLN A  31      -4.570  -3.343 -10.215  1.00  0.52           C  
ATOM    120  O   GLN A  31      -5.571  -3.934 -10.615  1.00  0.66           O  
ATOM    121  N   ASP A  32      -3.335  -3.640 -10.661  1.00  0.50           N  
ATOM    122  CA  ASP A  32      -2.923  -4.764 -11.441  1.00  0.60           C  
ATOM    123  C   ASP A  32      -3.313  -6.082 -10.866  1.00  0.65           C  
ATOM    124  O   ASP A  32      -3.813  -7.015 -11.493  1.00  0.81           O  
ATOM    125  N   LYS A  33      -3.099  -6.248  -9.548  1.00  0.62           N  
ATOM    126  CA  LYS A  33      -3.285  -7.441  -8.783  1.00  0.73           C  
ATOM    127  C   LYS A  33      -4.733  -7.732  -8.581  1.00  0.69           C  
ATOM    128  O   LYS A  33      -5.251  -8.718  -9.101  1.00  0.83           O  
ATOM    129  N   GLU A  34      -5.431  -6.922  -7.765  1.00  0.63           N  
ATOM    130  CA  GLU A  34      -6.721  -7.138  -7.189  1.00  0.67           C  
ATOM    131  C   GLU A  34      -7.790  -6.546  -8.040  1.00  0.69           C  
ATOM    132  O   GLU A  34      -8.828  -7.165  -8.273  1.00  0.95           O  
ATOM    133  N   GLY A  35      -7.571  -5.318  -8.544  1.00  0.63           N  
ATOM    134  CA  GLY A  35      -8.482  -4.570  -9.353  1.00  0.68           C  
ATOM    135  C   GLY A  35      -9.349  -3.618  -8.602  1.00  0.76           C  
ATOM    136  O   GLY A  35     -10.568  -3.653  -8.758  1.00  1.12           O  
ATOM    137  N   ILE A  36      -8.746  -2.778  -7.742  1.00  0.70           N  
ATOM    138  CA  ILE A  36      -9.462  -1.872  -6.899  1.00  0.76           C  
ATOM    139  C   ILE A  36      -8.910  -0.599  -7.442  1.00  0.71           C  
ATOM    140  O   ILE A  36      -7.709  -0.604  -7.708  1.00  0.73           O  
ATOM    141  N   PRO A  37      -9.622   0.465  -7.672  1.00  0.75           N  
ATOM    142  CA  PRO A  37      -9.081   1.719  -8.109  1.00  0.79           C  
ATOM    143  C   PRO A  37      -8.182   2.410  -7.141  1.00  0.75           C  
ATOM    144  O   PRO A  37      -8.421   2.325  -5.938  1.00  0.75           O  
ATOM    145  N   PRO A  38      -7.268   3.252  -7.525  1.00  0.81           N  
ATOM    146  CA  PRO A  38      -6.345   3.816  -6.583  1.00  0.85           C  
ATOM    147  C   PRO A  38      -6.873   4.853  -5.653  1.00  0.89           C  
ATOM    148  O   PRO A  38      -6.093   5.164  -4.754  1.00  0.99           O  
ATOM    149  N   ASP A  39      -8.096   5.370  -5.872  1.00  0.96           N  
ATOM    150  CA  ASP A  39      -8.793   6.203  -4.942  1.00  1.11           C  
ATOM    151  C   ASP A  39      -9.274   5.495  -3.722  1.00  1.00           C  
ATOM    152  O   ASP A  39      -8.983   5.916  -2.604  1.00  1.14           O  
ATOM    153  N   GLN A  40      -9.971   4.364  -3.931  1.00  0.87           N  
ATOM    154  CA  GLN A  40     -10.623   3.535  -2.964  1.00  0.84           C  
ATOM    155  C   GLN A  40      -9.561   3.052  -2.037  1.00  0.67           C  
ATOM    156  O   GLN A  40      -9.876   2.755  -0.887  1.00  0.80           O  
ATOM    157  N   GLN A  41      -8.311   2.799  -2.466  1.00  0.56           N  
ATOM    158  CA  GLN A  41      -7.329   2.158  -1.647  1.00  0.51           C  
ATOM    159  C   GLN A  41      -6.874   3.151  -0.634  1.00  0.49           C  
ATOM    160  O   GLN A  41      -6.535   4.237  -1.101  1.00  0.65           O  
ATOM    161  N   ARG A  42      -6.887   2.794   0.663  1.00  0.47           N  
ATOM    162  CA  ARG A  42      -6.231   3.540   1.690  1.00  0.55           C  
ATOM    163  C   ARG A  42      -5.105   2.677   2.145  1.00  0.46           C  
ATOM    164  O   ARG A  42      -5.334   1.654   2.789  1.00  0.52           O  
ATOM    165  N   LEU A  43      -3.860   3.135   1.927  1.00  0.46           N  
ATOM    166  CA  LEU A  43      -2.728   2.445   2.462  1.00  0.42           C  
ATOM    167  C   LEU A  43      -2.256   3.044   3.741  1.00  0.43           C  
ATOM    168  O   LEU A  43      -1.962   4.238   3.785  1.00  0.55           O  
ATOM    169  N   ILE A  44      -2.060   2.245   4.804  1.00  0.42           N  
ATOM    170  CA  ILE A  44      -1.531   2.595   6.086  1.00  0.46           C  
ATOM    171  C   ILE A  44      -0.235   1.925   6.392  1.00  0.42           C  
ATOM    172  O   ILE A  44      -0.019   0.735   6.171  1.00  0.53           O  
ATOM    173  N   PHE A  45       0.711   2.668   6.992  1.00  0.42           N  
ATOM    174  CA  PHE A  45       1.950   2.167   7.502  1.00  0.46           C  
ATOM    175  C   PHE A  45       2.202   2.548   8.920  1.00  0.68           C  
ATOM    176  O   PHE A  45       2.734   3.616   9.220  1.00  1.50           O  
ATOM    177  N   ALA A  46       1.707   1.731   9.867  1.00  0.81           N  
ATOM    178  CA  ALA A  46       1.750   1.938  11.281  1.00  0.96           C  
ATOM    179  C   ALA A  46       0.591   2.789  11.668  1.00  0.97           C  
ATOM    180  O   ALA A  46      -0.377   2.296  12.246  1.00  1.21           O  
ATOM    181  N   GLY A  47       0.624   4.098  11.359  1.00  0.99           N  
ATOM    182  CA  GLY A  47      -0.407   5.022  11.719  1.00  1.10           C  
ATOM    183  C   GLY A  47      -0.627   5.981  10.599  1.00  1.03           C  
ATOM    184  O   GLY A  47      -1.693   6.580  10.467  1.00  1.30           O  
ATOM    185  N   LYS A  48       0.375   6.135   9.717  1.00  0.98           N  
ATOM    186  CA  LYS A  48       0.360   7.022   8.596  1.00  1.05           C  
ATOM    187  C   LYS A  48      -0.407   6.404   7.477  1.00  0.84           C  
ATOM    188  O   LYS A  48      -0.124   5.262   7.120  1.00  0.81           O  
ATOM    189  N   GLN A  49      -1.380   7.160   6.936  1.00  0.84           N  
ATOM    190  CA  GLN A  49      -2.139   6.922   5.747  1.00  0.80           C  
ATOM    191  C   GLN A  49      -1.280   7.537   4.697  1.00  0.72           C  
ATOM    192  O   GLN A  49      -0.944   8.717   4.789  1.00  0.83           O  
ATOM    193  N   LEU A  50      -0.930   6.786   3.636  1.00  0.69           N  
ATOM    194  CA  LEU A  50       0.133   7.140   2.748  1.00  0.66           C  
ATOM    195  C   LEU A  50      -0.360   7.993   1.630  1.00  0.72           C  
ATOM    196  O   LEU A  50      -1.345   7.702   0.953  1.00  0.90           O  
ATOM    197  N   GLU A  51       0.257   9.163   1.383  1.00  0.70           N  
ATOM    198  CA  GLU A  51      -0.086   9.966   0.250  1.00  0.76           C  
ATOM    199  C   GLU A  51       0.455   9.501  -1.058  1.00  0.77           C  
ATOM    200  O   GLU A  51       1.615   9.108  -1.171  1.00  1.23           O  
ATOM    201  N   ASP A  52      -0.318   9.623  -2.152  1.00  0.66           N  
ATOM    202  CA  ASP A  52      -0.188   9.133  -3.489  1.00  0.65           C  
ATOM    203  C   ASP A  52       1.065   9.524  -4.194  1.00  0.60           C  
ATOM    204  O   ASP A  52       1.825   8.693  -4.689  1.00  0.62           O  
ATOM    205  N   GLY A  53       1.327  10.842  -4.271  1.00  0.68           N  
ATOM    206  CA  GLY A  53       2.448  11.502  -4.864  1.00  0.73           C  
ATOM    207  C   GLY A  53       3.643  11.520  -3.975  1.00  0.72           C  
ATOM    208  O   GLY A  53       4.599  12.208  -4.332  1.00  0.97           O  
ATOM    209  N   ARG A  54       3.760  10.750  -2.879  1.00  0.64           N  
ATOM    210  CA  ARG A  54       5.002  10.616  -2.183  1.00  0.63           C  
ATOM    211  C   ARG A  54       5.574   9.254  -2.373  1.00  0.59           C  
ATOM    212  O   ARG A  54       5.025   8.292  -2.908  1.00  0.62           O  
ATOM    213  N   THR A  55       6.873   9.144  -2.038  1.00  0.63           N  
ATOM    214  CA  THR A  55       7.695   7.976  -2.100  1.00  0.61           C  
ATOM    215  C   THR A  55       7.720   7.154  -0.858  1.00  0.59           C  
ATOM    216  O   THR A  55       7.545   7.565   0.288  1.00  0.64           O  
ATOM    217  N   LEU A  56       7.977   5.844  -1.016  1.00  0.58           N  
ATOM    218  CA  LEU A  56       8.172   4.899   0.040  1.00  0.59           C  
ATOM    219  C   LEU A  56       9.242   5.174   1.041  1.00  0.64           C  
ATOM    220  O   LEU A  56       8.998   5.146   2.247  1.00  0.70           O  
ATOM    221  N   SER A  57      10.448   5.567   0.594  1.00  0.68           N  
ATOM    222  CA  SER A  57      11.536   5.880   1.467  1.00  0.75           C  
ATOM    223  C   SER A  57      11.428   7.103   2.313  1.00  0.76           C  
ATOM    224  O   SER A  57      12.191   7.241   3.268  1.00  0.84           O  
ATOM    225  N   ASP A  58      10.448   7.964   1.992  1.00  0.75           N  
ATOM    226  CA  ASP A  58      10.144   9.151   2.730  1.00  0.78           C  
ATOM    227  C   ASP A  58       9.428   8.732   3.967  1.00  0.77           C  
ATOM    228  O   ASP A  58       9.561   9.342   5.028  1.00  0.86           O  
ATOM    229  N   TYR A  59       8.621   7.662   3.854  1.00  0.72           N  
ATOM    230  CA  TYR A  59       7.913   7.091   4.956  1.00  0.73           C  
ATOM    231  C   TYR A  59       8.752   6.114   5.706  1.00  0.76           C  
ATOM    232  O   TYR A  59       8.246   5.558   6.679  1.00  0.89           O  
ATOM    233  N   ASN A  60      10.016   5.948   5.277  1.00  0.74           N  
ATOM    234  CA  ASN A  60      11.032   5.091   5.806  1.00  0.79           C  
ATOM    235  C   ASN A  60      10.688   3.650   5.644  1.00  0.75           C  
ATOM    236  O   ASN A  60      10.929   2.779   6.479  1.00  0.86           O  
ATOM    237  N   ILE A  61      10.049   3.267   4.525  1.00  0.67           N  
ATOM    238  CA  ILE A  61       9.599   1.926   4.316  1.00  0.65           C  
ATOM    239  C   ILE A  61      10.662   1.082   3.702  1.00  0.66           C  
ATOM    240  O   ILE A  61      11.232   1.449   2.675  1.00  0.75           O  
ATOM    241  N   GLN A  62      11.042  -0.011   4.387  1.00  0.67           N  
ATOM    242  CA  GLN A  62      12.159  -0.761   3.903  1.00  0.70           C  
ATOM    243  C   GLN A  62      11.652  -2.143   3.674  1.00  0.62           C  
ATOM    244  O   GLN A  62      10.445  -2.375   3.737  1.00  0.64           O  
ATOM    245  N   LYS A  63      12.590  -3.080   3.452  1.00  0.64           N  
ATOM    246  CA  LYS A  63      12.298  -4.466   3.260  1.00  0.62           C  
ATOM    247  C   LYS A  63      11.528  -5.131   4.348  1.00  0.59           C  
ATOM    248  O   LYS A  63      11.704  -4.895   5.542  1.00  0.66           O  
ATOM    249  N   GLU A  64      10.609  -5.995   3.882  1.00  0.57           N  
ATOM    250  CA  GLU A  64       9.781  -6.810   4.718  1.00  0.58           C  
ATOM    251  C   GLU A  64       8.752  -6.050   5.481  1.00  0.56           C  
ATOM    252  O   GLU A  64       8.178  -6.638   6.396  1.00  0.70           O  
ATOM    253  N   SER A  65       8.423  -4.786   5.159  1.00  0.51           N  
ATOM    254  CA  SER A  65       7.474  -4.066   5.949  1.00  0.51           C  
ATOM    255  C   SER A  65       6.080  -4.475   5.618  1.00  0.43           C  
ATOM    256  O   SER A  65       5.786  -5.041   4.566  1.00  0.50           O  
ATOM    257  N   THR A  66       5.218  -4.231   6.622  1.00  0.45           N  
ATOM    258  CA  THR A  66       3.815  -4.500   6.562  1.00  0.45           C  
ATOM    259  C   THR A  66       3.134  -3.194   6.330  1.00  0.43           C  
ATOM    260  O   THR A  66       3.314  -2.251   7.097  1.00  0.58           O  
ATOM    261  N   LEU A  67       2.299  -3.181   5.275  1.00  0.38           N  
ATOM    262  CA  LEU A  67       1.436  -2.086   4.955  1.00  0.38           C  
ATOM    263  C   LEU A  67       0.063  -2.650   5.087  1.00  0.37           C  
ATOM    264  O   LEU A  67      -0.131  -3.856   4.942  1.00  0.50           O  
ATOM    265  N   HIS A  68      -0.957  -1.847   5.437  1.00  0.35           N  
ATOM    266  CA  HIS A  68      -2.285  -2.257   5.776  1.00  0.37           C  
ATOM    267  C   HIS A  68      -3.184  -1.667   4.744  1.00  0.35           C  
ATOM    268  O   HIS A  68      -3.231  -0.443   4.637  1.00  0.48           O  
ATOM    269  N   LEU A  69      -3.810  -2.479   3.874  1.00  0.36           N  
ATOM    270  CA  LEU A  69      -4.657  -1.929   2.861  1.00  0.38           C  
ATOM    271  C   LEU A  69      -6.049  -2.046   3.378  1.00  0.41           C  
ATOM    272  O   LEU A  69      -6.577  -3.146   3.531  1.00  0.56           O  
ATOM    273  N   VAL A  70      -6.691  -0.866   3.454  1.00  0.45           N  
ATOM    274  CA  VAL A  70      -8.078  -0.779   3.792  1.00  0.56           C  
ATOM    275  C   VAL A  70      -8.749   0.017   2.726  1.00  0.55           C  
ATOM    276  O   VAL A  70      -8.107   0.836   2.070  1.00  0.58           O  
TER
ENDMDL
MODEL      5
ATOM      1  N   GLN A   2      11.322  -6.212  -1.190  1.00  0.59           N  
ATOM      2  CA  GLN A   2      10.033  -6.796  -0.983  1.00  0.56           C  
ATOM      3  C   GLN A   2       9.315  -6.101   0.123  1.00  0.50           C  
ATOM      4  O   GLN A   2       9.856  -5.923   1.214  1.00  0.60           O  
ATOM      5  N   ILE A   3       8.013  -5.812  -0.050  1.00  0.44           N  
ATOM      6  CA  ILE A   3       7.115  -5.283   0.928  1.00  0.42           C  
ATOM      7  C   ILE A   3       5.918  -6.169   0.875  1.00  0.40           C  
ATOM      8  O   ILE A   3       5.754  -6.896  -0.103  1.00  0.50           O  
ATOM      9  N   PHE A   4       5.051  -6.209   1.903  1.00  0.37           N  
ATOM     10  CA  PHE A   4       3.851  -6.986   1.925  1.00  0.38           C  
ATOM     11  C   PHE A   4       2.669  -6.087   2.048  1.00  0.39           C  
ATOM     12  O   PHE A   4       2.743  -5.012   2.641  1.00  0.60           O  
ATOM     13  N   VAL A   5       1.500  -6.470   1.503  1.00  0.35           N  
ATOM     14  CA  VAL A   5       0.326  -5.659   1.605  1.00  0.35           C  
ATOM     15  C   VAL A   5      -0.767  -6.575   2.032  1.00  0.35           C  
ATOM     16  O   VAL A   5      -0.947  -7.679   1.519  1.00  0.46           O  
ATOM     17  N   LYS A   6      -1.409  -6.249   3.168  1.00  0.36           N  
ATOM     18  CA  LYS A   6      -2.481  -7.054   3.665  1.00  0.39           C  
ATOM     19  C   LYS A   6      -3.755  -6.425   3.220  1.00  0.46           C  
ATOM     20  O   LYS A   6      -3.941  -5.210   3.177  1.00  0.53           O  
ATOM     21  N   THR A   7      -4.819  -7.205   2.955  1.00  0.58           N  
ATOM     22  CA  THR A   7      -6.143  -6.781   2.621  1.00  0.78           C  
ATOM     23  C   THR A   7      -7.072  -6.884   3.782  1.00  0.94           C  
ATOM     24  O   THR A   7      -6.795  -7.448   4.839  1.00  0.99           O  
ATOM     25  N   LEU A   8      -8.317  -6.415   3.585  1.00  1.17           N  
ATOM     26  CA  LEU A   8      -9.430  -6.589   4.467  1.00  1.39           C  
ATOM     27  C   LEU A   8      -9.785  -8.008   4.752  1.00  1.44           C  
ATOM     28  O   LEU A   8      -9.719  -8.450   5.898  1.00  1.60           O  
ATOM     29  N   THR A   9     -10.102  -8.820   3.727  1.00  1.41           N  
ATOM     30  CA  THR A   9     -10.457 -10.196   3.886  1.00  1.51           C  
ATOM     31  C   THR A   9      -9.383 -11.204   4.109  1.00  1.37           C  
ATOM     32  O   THR A   9      -9.629 -12.312   4.582  1.00  1.62           O  
ATOM     33  N   GLY A  10      -8.103 -10.866   3.867  1.00  1.18           N  
ATOM     34  CA  GLY A  10      -7.058 -11.775   4.219  1.00  1.22           C  
ATOM     35  C   GLY A  10      -6.065 -12.136   3.169  1.00  0.99           C  
ATOM     36  O   GLY A  10      -5.413 -13.153   3.398  1.00  1.31           O  
ATOM     37  N   LYS A  11      -5.983 -11.350   2.080  1.00  0.73           N  
ATOM     38  CA  LYS A  11      -5.095 -11.728   1.025  1.00  0.60           C  
ATOM     39  C   LYS A  11      -3.871 -10.950   1.367  1.00  0.51           C  
ATOM     40  O   LYS A  11      -3.878  -9.734   1.546  1.00  0.63           O  
ATOM     41  N   THR A  12      -2.711 -11.600   1.569  1.00  0.49           N  
ATOM     42  CA  THR A  12      -1.409 -11.020   1.692  1.00  0.48           C  
ATOM     43  C   THR A  12      -0.719 -10.969   0.373  1.00  0.52           C  
ATOM     44  O   THR A  12      -0.337 -11.979  -0.218  1.00  0.72           O  
ATOM     45  N   ILE A  13      -0.415  -9.769  -0.152  1.00  0.48           N  
ATOM     46  CA  ILE A  13       0.377  -9.631  -1.334  1.00  0.55           C  
ATOM     47  C   ILE A  13       1.805  -9.241  -1.156  1.00  0.51           C  
ATOM     48  O   ILE A  13       2.040  -8.342  -0.350  1.00  0.56           O  
ATOM     49  N   THR A  14       2.793  -9.853  -1.834  1.00  0.55           N  
ATOM     50  CA  THR A  14       4.164  -9.495  -1.648  1.00  0.54           C  
ATOM     51  C   THR A  14       4.427  -8.693  -2.875  1.00  0.55           C  
ATOM     52  O   THR A  14       3.904  -9.151  -3.890  1.00  0.72           O  
ATOM     53  N   LEU A  15       5.136  -7.551  -2.814  1.00  0.50           N  
ATOM     54  CA  LEU A  15       5.401  -6.686  -3.921  1.00  0.55           C  
ATOM     55  C   LEU A  15       6.851  -6.363  -4.033  1.00  0.52           C  
ATOM     56  O   LEU A  15       7.481  -6.254  -2.982  1.00  0.58           O  
ATOM     57  N   GLU A  16       7.475  -6.245  -5.219  1.00  0.59           N  
ATOM     58  CA  GLU A  16       8.829  -5.871  -5.487  1.00  0.63           C  
ATOM     59  C   GLU A  16       8.727  -4.445  -5.908  1.00  0.65           C  
ATOM     60  O   GLU A  16       8.100  -4.131  -6.920  1.00  0.81           O  
ATOM     61  N   VAL A  17       9.372  -3.598  -5.088  1.00  0.61           N  
ATOM     62  CA  VAL A  17       9.260  -2.179  -5.225  1.00  0.63           C  
ATOM     63  C   VAL A  17      10.681  -1.748  -5.108  1.00  0.65           C  
ATOM     64  O   VAL A  17      11.573  -2.392  -4.559  1.00  0.76           O  
ATOM     65  N   GLU A  18      10.820  -0.483  -5.547  1.00  0.68           N  
ATOM     66  CA  GLU A  18      12.015   0.248  -5.262  1.00  0.74           C  
ATOM     67  C   GLU A  18      11.667   1.300  -4.265  1.00  0.71           C  
ATOM     68  O   GLU A  18      10.474   1.577  -4.156  1.00  0.74           O  
ATOM     69  N   PRO A  19      12.523   1.901  -3.493  1.00  0.74           N  
ATOM     70  CA  PRO A  19      12.055   2.786  -2.466  1.00  0.74           C  
ATOM     71  C   PRO A  19      11.746   4.119  -3.055  1.00  0.70           C  
ATOM     72  O   PRO A  19      11.213   5.037  -2.437  1.00  0.74           O  
ATOM     73  N   SER A  20      12.143   4.402  -4.309  1.00  0.70           N  
ATOM     74  CA  SER A  20      11.980   5.610  -5.056  1.00  0.74           C  
ATOM     75  C   SER A  20      10.667   5.616  -5.760  1.00  0.71           C  
ATOM     76  O   SER A  20      10.198   6.593  -6.342  1.00  0.80           O  
ATOM     77  N   ASP A  21       9.953   4.477  -5.728  1.00  0.70           N  
ATOM     78  CA  ASP A  21       8.602   4.254  -6.141  1.00  0.73           C  
ATOM     79  C   ASP A  21       7.712   5.021  -5.225  1.00  0.64           C  
ATOM     80  O   ASP A  21       8.050   5.254  -4.066  1.00  0.66           O  
ATOM     81  N   THR A  22       6.558   5.494  -5.729  1.00  0.63           N  
ATOM     82  CA  THR A  22       5.599   6.190  -4.929  1.00  0.58           C  
ATOM     83  C   THR A  22       4.533   5.325  -4.351  1.00  0.53           C  
ATOM     84  O   THR A  22       4.558   4.119  -4.598  1.00  0.58           O  
ATOM     85  N   ILE A  23       3.508   5.895  -3.694  1.00  0.51           N  
ATOM     86  CA  ILE A  23       2.401   5.196  -3.118  1.00  0.48           C  
ATOM     87  C   ILE A  23       1.447   4.872  -4.215  1.00  0.48           C  
ATOM     88  O   ILE A  23       0.833   3.807  -4.248  1.00  0.51           O  
ATOM     89  N   GLU A  24       1.279   5.793  -5.180  1.00  0.50           N  
ATOM     90  CA  GLU A  24       0.646   5.595  -6.446  1.00  0.53           C  
ATOM     91  C   GLU A  24       1.128   4.432  -7.244  1.00  0.50           C  
ATOM     92  O   GLU A  24       0.290   3.655  -7.699  1.00  0.55           O  
ATOM     93  N   ASN A  25       2.449   4.246  -7.414  1.00  0.51           N  
ATOM     94  CA  ASN A  25       3.012   3.122  -8.097  1.00  0.52           C  
ATOM     95  C   ASN A  25       2.611   1.826  -7.481  1.00  0.47           C  
ATOM     96  O   ASN A  25       2.335   0.829  -8.146  1.00  0.53           O  
ATOM     97  N   VAL A  26       2.766   1.761  -6.146  1.00  0.45           N  
ATOM     98  CA  VAL A  26       2.356   0.667  -5.321  1.00  0.44           C  
ATOM     99  C   VAL A  26       0.912   0.312  -5.426  1.00  0.40           C  
ATOM    100  O   VAL A  26       0.530  -0.793  -5.809  1.00  0.44           O  
ATOM    101  N   LYS A  27      -0.031   1.257  -5.263  1.00  0.40           N  
ATOM    102  CA  LYS A  27      -1.440   1.097  -5.448  1.00  0.41           C  
ATOM    103  C   LYS A  27      -1.844   0.735  -6.835  1.00  0.38           C  
ATOM    104  O   LYS A  27      -2.904   0.240  -7.214  1.00  0.42           O  
ATOM    105  N   ALA A  28      -1.009   1.031  -7.848  1.00  0.39           N  
ATOM    106  CA  ALA A  28      -1.178   0.594  -9.198  1.00  0.39           C  
ATOM    107  C   ALA A  28      -0.832  -0.844  -9.382  1.00  0.36           C  
ATOM    108  O   ALA A  28      -1.504  -1.539 -10.143  1.00  0.42           O  
ATOM    109  N   LYS A  29       0.177  -1.414  -8.699  1.00  0.39           N  
ATOM    110  CA  LYS A  29       0.390  -2.828  -8.738  1.00  0.43           C  
ATOM    111  C   LYS A  29      -0.725  -3.505  -8.019  1.00  0.44           C  
ATOM    112  O   LYS A  29      -1.143  -4.615  -8.346  1.00  0.54           O  
ATOM    113  N   ILE A  30      -1.399  -2.980  -6.980  1.00  0.41           N  
ATOM    114  CA  ILE A  30      -2.513  -3.620  -6.353  1.00  0.44           C  
ATOM    115  C   ILE A  30      -3.720  -3.648  -7.227  1.00  0.45           C  
ATOM    116  O   ILE A  30      -4.455  -4.628  -7.333  1.00  0.56           O  
ATOM    117  N   GLN A  31      -3.861  -2.610  -8.072  1.00  0.41           N  
ATOM    118  CA  GLN A  31      -4.861  -2.604  -9.094  1.00  0.48           C  
ATOM    119  C   GLN A  31      -4.562  -3.699 -10.060  1.00  0.52           C  
ATOM    120  O   GLN A  31      -5.511  -4.352 -10.493  1.00  0.66           O  
ATOM    121  N   ASP A  32      -3.289  -3.901 -10.441  1.00  0.50           N  
ATOM    122  CA  ASP A  32      -2.895  -5.063 -11.177  1.00  0.60           C  
ATOM    123  C   ASP A  32      -3.303  -6.356 -10.560  1.00  0.65           C  
ATOM    124  O   ASP A  32      -3.780  -7.261 -11.243  1.00  0.81           O  
ATOM    125  N   LYS A  33      -3.045  -6.591  -9.261  1.00  0.62           N  
ATOM    126  CA  LYS A  33      -3.374  -7.822  -8.611  1.00  0.73           C  
ATOM    127  C   LYS A  33      -4.826  -8.070  -8.389  1.00  0.69           C  
ATOM    128  O   LYS A  33      -5.449  -8.960  -8.965  1.00  0.83           O  
ATOM    129  N   GLU A  34      -5.432  -7.358  -7.422  1.00  0.63           N  
ATOM    130  CA  GLU A  34      -6.744  -7.557  -6.888  1.00  0.67           C  
ATOM    131  C   GLU A  34      -7.805  -6.781  -7.589  1.00  0.69           C  
ATOM    132  O   GLU A  34      -8.981  -7.129  -7.684  1.00  0.95           O  
ATOM    133  N   GLY A  35      -7.504  -5.610  -8.178  1.00  0.63           N  
ATOM    134  CA  GLY A  35      -8.405  -4.844  -8.982  1.00  0.68           C  
ATOM    135  C   GLY A  35      -9.199  -3.831  -8.231  1.00  0.76           C  
ATOM    136  O   GLY A  35     -10.427  -3.826  -8.159  1.00  1.12           O  
ATOM    137  N   ILE A  36      -8.471  -2.967  -7.502  1.00  0.70           N  
ATOM    138  CA  ILE A  36      -9.092  -2.024  -6.625  1.00  0.76           C  
ATOM    139  C   ILE A  36      -8.699  -0.689  -7.158  1.00  0.71           C  
ATOM    140  O   ILE A  36      -7.521  -0.502  -7.463  1.00  0.73           O  
ATOM    141  N   PRO A  37      -9.472   0.332  -7.377  1.00  0.75           N  
ATOM    142  CA  PRO A  37      -8.977   1.565  -7.916  1.00  0.79           C  
ATOM    143  C   PRO A  37      -7.981   2.312  -7.099  1.00  0.75           C  
ATOM    144  O   PRO A  37      -8.042   2.083  -5.891  1.00  0.75           O  
ATOM    145  N   PRO A  38      -7.061   3.085  -7.594  1.00  0.81           N  
ATOM    146  CA  PRO A  38      -6.052   3.744  -6.816  1.00  0.85           C  
ATOM    147  C   PRO A  38      -6.605   4.803  -5.925  1.00  0.89           C  
ATOM    148  O   PRO A  38      -5.941   5.229  -4.981  1.00  0.99           O  
ATOM    149  N   ASP A  39      -7.857   5.211  -6.197  1.00  0.96           N  
ATOM    150  CA  ASP A  39      -8.644   6.115  -5.417  1.00  1.11           C  
ATOM    151  C   ASP A  39      -9.228   5.608  -4.143  1.00  1.00           C  
ATOM    152  O   ASP A  39      -9.311   6.321  -3.144  1.00  1.14           O  
ATOM    153  N   GLN A  40      -9.538   4.299  -4.120  1.00  0.87           N  
ATOM    154  CA  GLN A  40     -10.246   3.706  -3.029  1.00  0.84           C  
ATOM    155  C   GLN A  40      -9.314   3.156  -2.004  1.00  0.67           C  
ATOM    156  O   GLN A  40      -9.599   3.060  -0.811  1.00  0.80           O  
ATOM    157  N   GLN A  41      -8.102   2.788  -2.457  1.00  0.56           N  
ATOM    158  CA  GLN A  41      -7.078   2.154  -1.685  1.00  0.51           C  
ATOM    159  C   GLN A  41      -6.383   3.095  -0.762  1.00  0.49           C  
ATOM    160  O   GLN A  41      -5.881   4.150  -1.147  1.00  0.65           O  
ATOM    161  N   ARG A  42      -6.547   2.953   0.565  1.00  0.47           N  
ATOM    162  CA  ARG A  42      -5.745   3.646   1.525  1.00  0.55           C  
ATOM    163  C   ARG A  42      -4.777   2.640   2.047  1.00  0.46           C  
ATOM    164  O   ARG A  42      -5.144   1.668   2.705  1.00  0.52           O  
ATOM    165  N   LEU A  43      -3.496   2.981   1.820  1.00  0.46           N  
ATOM    166  CA  LEU A  43      -2.423   2.210   2.366  1.00  0.42           C  
ATOM    167  C   LEU A  43      -2.004   2.878   3.629  1.00  0.43           C  
ATOM    168  O   LEU A  43      -1.851   4.098   3.654  1.00  0.55           O  
ATOM    169  N   ILE A  44      -1.912   2.079   4.707  1.00  0.42           N  
ATOM    170  CA  ILE A  44      -1.599   2.432   6.057  1.00  0.46           C  
ATOM    171  C   ILE A  44      -0.199   2.013   6.347  1.00  0.42           C  
ATOM    172  O   ILE A  44       0.180   0.870   6.096  1.00  0.53           O  
ATOM    173  N   PHE A  45       0.558   2.909   7.005  1.00  0.42           N  
ATOM    174  CA  PHE A  45       1.850   2.638   7.555  1.00  0.46           C  
ATOM    175  C   PHE A  45       2.233   3.523   8.691  1.00  0.68           C  
ATOM    176  O   PHE A  45       2.030   4.736   8.664  1.00  1.50           O  
ATOM    177  N   ALA A  46       2.628   2.881   9.805  1.00  0.81           N  
ATOM    178  CA  ALA A  46       3.057   3.576  10.979  1.00  0.96           C  
ATOM    179  C   ALA A  46       1.994   4.296  11.735  1.00  0.97           C  
ATOM    180  O   ALA A  46       2.260   5.272  12.435  1.00  1.21           O  
ATOM    181  N   GLY A  47       0.759   3.776  11.617  1.00  0.99           N  
ATOM    182  CA  GLY A  47      -0.397   4.333  12.247  1.00  1.10           C  
ATOM    183  C   GLY A  47      -1.265   5.185  11.384  1.00  1.03           C  
ATOM    184  O   GLY A  47      -2.340   5.616  11.797  1.00  1.30           O  
ATOM    185  N   LYS A  48      -0.717   5.530  10.206  1.00  0.98           N  
ATOM    186  CA  LYS A  48      -1.258   6.539   9.349  1.00  1.05           C  
ATOM    187  C   LYS A  48      -1.308   6.166   7.907  1.00  0.84           C  
ATOM    188  O   LYS A  48      -0.541   5.356   7.389  1.00  0.81           O  
ATOM    189  N   GLN A  49      -2.363   6.604   7.197  1.00  0.84           N  
ATOM    190  CA  GLN A  49      -2.526   6.512   5.778  1.00  0.80           C  
ATOM    191  C   GLN A  49      -1.646   7.425   4.996  1.00  0.72           C  
ATOM    192  O   GLN A  49      -1.380   8.536   5.452  1.00  0.83           O  
ATOM    193  N   LEU A  50      -1.237   7.037   3.774  1.00  0.69           N  
ATOM    194  CA  LEU A  50      -0.168   7.689   3.086  1.00  0.66           C  
ATOM    195  C   LEU A  50      -0.613   8.401   1.855  1.00  0.72           C  
ATOM    196  O   LEU A  50      -1.598   8.043   1.211  1.00  0.90           O  
ATOM    197  N   GLU A  51       0.070   9.515   1.531  1.00  0.70           N  
ATOM    198  CA  GLU A  51      -0.241  10.200   0.315  1.00  0.76           C  
ATOM    199  C   GLU A  51       0.287   9.528  -0.906  1.00  0.77           C  
ATOM    200  O   GLU A  51       1.362   8.928  -0.910  1.00  1.23           O  
ATOM    201  N   ASP A  52      -0.415   9.761  -2.028  1.00  0.66           N  
ATOM    202  CA  ASP A  52      -0.154   9.015  -3.221  1.00  0.65           C  
ATOM    203  C   ASP A  52       1.097   9.363  -3.951  1.00  0.60           C  
ATOM    204  O   ASP A  52       1.830   8.458  -4.346  1.00  0.62           O  
ATOM    205  N   GLY A  53       1.383  10.637  -4.273  1.00  0.68           N  
ATOM    206  CA  GLY A  53       2.673  10.971  -4.790  1.00  0.73           C  
ATOM    207  C   GLY A  53       3.806  11.206  -3.851  1.00  0.72           C  
ATOM    208  O   GLY A  53       4.675  12.037  -4.110  1.00  0.97           O  
ATOM    209  N   ARG A  54       3.898  10.539  -2.687  1.00  0.64           N  
ATOM    210  CA  ARG A  54       5.084  10.414  -1.898  1.00  0.63           C  
ATOM    211  C   ARG A  54       5.795   9.142  -2.211  1.00  0.59           C  
ATOM    212  O   ARG A  54       5.189   8.221  -2.758  1.00  0.62           O  
ATOM    213  N   THR A  55       7.117   9.061  -1.978  1.00  0.63           N  
ATOM    214  CA  THR A  55       7.965   7.920  -2.124  1.00  0.61           C  
ATOM    215  C   THR A  55       7.977   7.096  -0.882  1.00  0.59           C  
ATOM    216  O   THR A  55       7.595   7.449   0.232  1.00  0.64           O  
ATOM    217  N   LEU A  56       8.495   5.860  -1.006  1.00  0.58           N  
ATOM    218  CA  LEU A  56       8.618   4.955   0.094  1.00  0.59           C  
ATOM    219  C   LEU A  56       9.807   5.320   0.914  1.00  0.64           C  
ATOM    220  O   LEU A  56       9.840   4.866   2.058  1.00  0.70           O  
ATOM    221  N   SER A  57      10.766   6.069   0.343  1.00  0.68           N  
ATOM    222  CA  SER A  57      11.918   6.638   0.973  1.00  0.75           C  
ATOM    223  C   SER A  57      11.568   7.762   1.886  1.00  0.76           C  
ATOM    224  O   SER A  57      12.330   8.012   2.821  1.00  0.84           O  
ATOM    225  N   ASP A  58      10.468   8.473   1.586  1.00  0.75           N  
ATOM    226  CA  ASP A  58       9.850   9.464   2.411  1.00  0.78           C  
ATOM    227  C   ASP A  58       9.213   8.932   3.650  1.00  0.77           C  
ATOM    228  O   ASP A  58       9.440   9.497   4.718  1.00  0.86           O  
ATOM    229  N   TYR A  59       8.614   7.729   3.604  1.00  0.72           N  
ATOM    230  CA  TYR A  59       7.991   7.076   4.714  1.00  0.73           C  
ATOM    231  C   TYR A  59       8.953   6.128   5.344  1.00  0.76           C  
ATOM    232  O   TYR A  59       8.552   5.403   6.252  1.00  0.89           O  
ATOM    233  N   ASN A  60      10.231   6.137   4.925  1.00  0.74           N  
ATOM    234  CA  ASN A  60      11.314   5.283   5.304  1.00  0.79           C  
ATOM    235  C   ASN A  60      10.978   3.832   5.343  1.00  0.75           C  
ATOM    236  O   ASN A  60      11.280   3.075   6.265  1.00  0.86           O  
ATOM    237  N   ILE A  61      10.183   3.395   4.351  1.00  0.67           N  
ATOM    238  CA  ILE A  61       9.693   2.059   4.223  1.00  0.65           C  
ATOM    239  C   ILE A  61      10.831   1.263   3.680  1.00  0.66           C  
ATOM    240  O   ILE A  61      11.171   1.484   2.520  1.00  0.75           O  
ATOM    241  N   GLN A  62      11.441   0.455   4.566  1.00  0.67           N  
ATOM    242  CA  GLN A  62      12.495  -0.500   4.421  1.00  0.70           C  
ATOM    243  C   GLN A  62      12.040  -1.791   3.833  1.00  0.62           C  
ATOM    244  O   GLN A  62      10.898  -1.938   3.400  1.00  0.64           O  
ATOM    245  N   LYS A  63      12.859  -2.858   3.829  1.00  0.64           N  
ATOM    246  CA  LYS A  63      12.391  -4.142   3.408  1.00  0.62           C  
ATOM    247  C   LYS A  63      11.546  -4.836   4.420  1.00  0.59           C  
ATOM    248  O   LYS A  63      11.614  -4.673   5.637  1.00  0.66           O  
ATOM    249  N   GLU A  64      10.743  -5.755   3.856  1.00  0.57           N  
ATOM    250  CA  GLU A  64       9.976  -6.672   4.642  1.00  0.58           C  
ATOM    251  C   GLU A  64       8.891  -5.985   5.399  1.00  0.56           C  
ATOM    252  O   GLU A  64       8.468  -6.452   6.455  1.00  0.70           O  
ATOM    253  N   SER A  65       8.447  -4.796   4.951  1.00  0.51           N  
ATOM    254  CA  SER A  65       7.507  -3.901   5.551  1.00  0.51           C  
ATOM    255  C   SER A  65       6.107  -4.256   5.184  1.00  0.43           C  
ATOM    256  O   SER A  65       5.744  -4.429   4.021  1.00  0.50           O  
ATOM    257  N   THR A  66       5.189  -4.459   6.146  1.00  0.45           N  
ATOM    258  CA  THR A  66       3.817  -4.765   5.884  1.00  0.45           C  
ATOM    259  C   THR A  66       3.097  -3.460   5.858  1.00  0.43           C  
ATOM    260  O   THR A  66       3.072  -2.685   6.813  1.00  0.58           O  
ATOM    261  N   LEU A  67       2.469  -3.161   4.707  1.00  0.38           N  
ATOM    262  CA  LEU A  67       1.687  -1.996   4.432  1.00  0.38           C  
ATOM    263  C   LEU A  67       0.275  -2.467   4.498  1.00  0.37           C  
ATOM    264  O   LEU A  67       0.014  -3.569   4.018  1.00  0.50           O  
ATOM    265  N   HIS A  68      -0.713  -1.778   5.096  1.00  0.35           N  
ATOM    266  CA  HIS A  68      -2.049  -2.283   5.182  1.00  0.37           C  
ATOM    267  C   HIS A  68      -3.038  -1.601   4.301  1.00  0.35           C  
ATOM    268  O   HIS A  68      -3.008  -0.377   4.188  1.00  0.48           O  
ATOM    269  N   LEU A  69      -3.939  -2.350   3.640  1.00  0.36           N  
ATOM    270  CA  LEU A  69      -4.931  -1.828   2.752  1.00  0.38           C  
ATOM    271  C   LEU A  69      -6.250  -1.691   3.430  1.00  0.41           C  
ATOM    272  O   LEU A  69      -6.928  -2.637   3.830  1.00  0.56           O  
ATOM    273  N   VAL A  70      -6.663  -0.438   3.698  1.00  0.45           N  
ATOM    274  CA  VAL A  70      -7.913   0.014   4.222  1.00  0.56           C  
ATOM    275  C   VAL A  70      -8.700   0.758   3.199  1.00  0.55           C  
ATOM    276  O   VAL A  70      -8.195   1.579   2.434  1.00  0.58           O  
TER
ENDMDL
MODEL      6
ATOM      1  N   GLN A   2      10.828  -6.118  -1.669  1.00  0.59           N  
ATOM      2  CA  GLN A   2       9.509  -6.500  -1.270  1.00  0.56           C  
ATOM      3  C   GLN A   2       8.819  -5.892  -0.099  1.00  0.50           C  
ATOM      4  O   GLN A   2       9.455  -5.696   0.936  1.00  0.60           O  
ATOM      5  N   ILE A   3       7.489  -5.746  -0.244  1.00  0.44           N  
ATOM      6  CA  ILE A   3       6.621  -5.269   0.787  1.00  0.42           C  
ATOM      7  C   ILE A   3       5.490  -6.225   0.956  1.00  0.40           C  
ATOM      8  O   ILE A   3       5.116  -6.987   0.066  1.00  0.50           O  
ATOM      9  N   PHE A   4       4.894  -6.270   2.162  1.00  0.37           N  
ATOM     10  CA  PHE A   4       3.804  -7.159   2.416  1.00  0.38           C  
ATOM     11  C   PHE A   4       2.707  -6.165   2.583  1.00  0.39           C  
ATOM     12  O   PHE A   4       2.724  -5.338   3.494  1.00  0.60           O  
ATOM     13  N   VAL A   5       1.658  -6.262   1.746  1.00  0.35           N  
ATOM     14  CA  VAL A   5       0.522  -5.397   1.812  1.00  0.35           C  
ATOM     15  C   VAL A   5      -0.616  -6.269   2.220  1.00  0.35           C  
ATOM     16  O   VAL A   5      -1.162  -7.101   1.496  1.00  0.46           O  
ATOM     17  N   LYS A   6      -1.142  -6.066   3.440  1.00  0.36           N  
ATOM     18  CA  LYS A   6      -2.261  -6.785   3.965  1.00  0.39           C  
ATOM     19  C   LYS A   6      -3.598  -6.203   3.658  1.00  0.46           C  
ATOM     20  O   LYS A   6      -3.721  -4.979   3.689  1.00  0.53           O  
ATOM     21  N   THR A   7      -4.657  -7.005   3.450  1.00  0.58           N  
ATOM     22  CA  THR A   7      -6.008  -6.604   3.206  1.00  0.78           C  
ATOM     23  C   THR A   7      -6.741  -6.575   4.503  1.00  0.94           C  
ATOM     24  O   THR A   7      -6.241  -7.144   5.473  1.00  0.99           O  
ATOM     25  N   LEU A   8      -7.904  -5.912   4.618  1.00  1.17           N  
ATOM     26  CA  LEU A   8      -8.750  -5.844   5.769  1.00  1.39           C  
ATOM     27  C   LEU A   8      -9.308  -7.181   6.118  1.00  1.44           C  
ATOM     28  O   LEU A   8      -9.422  -7.586   7.274  1.00  1.60           O  
ATOM     29  N   THR A   9      -9.461  -8.006   5.067  1.00  1.41           N  
ATOM     30  CA  THR A   9     -10.040  -9.307   5.193  1.00  1.51           C  
ATOM     31  C   THR A   9      -9.064 -10.342   5.636  1.00  1.37           C  
ATOM     32  O   THR A   9      -9.228 -11.165   6.534  1.00  1.62           O  
ATOM     33  N   GLY A  10      -7.853 -10.379   5.052  1.00  1.18           N  
ATOM     34  CA  GLY A  10      -6.815 -11.232   5.540  1.00  1.22           C  
ATOM     35  C   GLY A  10      -5.826 -11.721   4.539  1.00  0.99           C  
ATOM     36  O   GLY A  10      -5.217 -12.760   4.788  1.00  1.31           O  
ATOM     37  N   LYS A  11      -5.602 -11.049   3.396  1.00  0.73           N  
ATOM     38  CA  LYS A  11      -4.783 -11.537   2.331  1.00  0.60           C  
ATOM     39  C   LYS A  11      -3.521 -10.756   2.473  1.00  0.51           C  
ATOM     40  O   LYS A  11      -3.545  -9.560   2.760  1.00  0.63           O  
ATOM     41  N   THR A  12      -2.359 -11.424   2.360  1.00  0.49           N  
ATOM     42  CA  THR A  12      -1.098 -10.759   2.259  1.00  0.48           C  
ATOM     43  C   THR A  12      -0.692 -10.663   0.829  1.00  0.52           C  
ATOM     44  O   THR A  12      -0.392 -11.728   0.290  1.00  0.72           O  
ATOM     45  N   ILE A  13      -0.614  -9.501   0.155  1.00  0.48           N  
ATOM     46  CA  ILE A  13      -0.155  -9.332  -1.189  1.00  0.55           C  
ATOM     47  C   ILE A  13       1.284  -8.968  -1.067  1.00  0.51           C  
ATOM     48  O   ILE A  13       1.636  -7.973  -0.433  1.00  0.56           O  
ATOM     49  N   THR A  14       2.211  -9.756  -1.640  1.00  0.55           N  
ATOM     50  CA  THR A  14       3.602  -9.427  -1.605  1.00  0.54           C  
ATOM     51  C   THR A  14       3.855  -8.658  -2.856  1.00  0.55           C  
ATOM     52  O   THR A  14       3.609  -9.129  -3.965  1.00  0.72           O  
ATOM     53  N   LEU A  15       4.405  -7.437  -2.725  1.00  0.50           N  
ATOM     54  CA  LEU A  15       4.619  -6.505  -3.788  1.00  0.55           C  
ATOM     55  C   LEU A  15       6.063  -6.173  -3.943  1.00  0.52           C  
ATOM     56  O   LEU A  15       6.781  -5.866  -2.993  1.00  0.58           O  
ATOM     57  N   GLU A  16       6.538  -6.271  -5.197  1.00  0.59           N  
ATOM     58  CA  GLU A  16       7.856  -5.912  -5.624  1.00  0.63           C  
ATOM     59  C   GLU A  16       7.785  -4.448  -5.898  1.00  0.65           C  
ATOM     60  O   GLU A  16       7.018  -4.013  -6.756  1.00  0.81           O  
ATOM     61  N   VAL A  17       8.701  -3.691  -5.270  1.00  0.61           N  
ATOM     62  CA  VAL A  17       8.818  -2.266  -5.324  1.00  0.63           C  
ATOM     63  C   VAL A  17      10.237  -1.810  -5.316  1.00  0.65           C  
ATOM     64  O   VAL A  17      11.114  -2.556  -4.882  1.00  0.76           O  
ATOM     65  N   GLU A  18      10.452  -0.520  -5.627  1.00  0.68           N  
ATOM     66  CA  GLU A  18      11.694   0.121  -5.324  1.00  0.74           C  
ATOM     67  C   GLU A  18      11.519   1.301  -4.433  1.00  0.71           C  
ATOM     68  O   GLU A  18      10.404   1.818  -4.461  1.00  0.74           O  
ATOM     69  N   PRO A  19      12.402   1.904  -3.691  1.00  0.74           N  
ATOM     70  CA  PRO A  19      12.139   3.000  -2.806  1.00  0.74           C  
ATOM     71  C   PRO A  19      11.591   4.203  -3.493  1.00  0.70           C  
ATOM     72  O   PRO A  19      10.835   4.944  -2.865  1.00  0.74           O  
ATOM     73  N   SER A  20      11.883   4.345  -4.799  1.00  0.70           N  
ATOM     74  CA  SER A  20      11.459   5.395  -5.672  1.00  0.74           C  
ATOM     75  C   SER A  20      10.028   5.285  -6.076  1.00  0.71           C  
ATOM     76  O   SER A  20       9.443   6.250  -6.564  1.00  0.80           O  
ATOM     77  N   ASP A  21       9.365   4.117  -6.003  1.00  0.70           N  
ATOM     78  CA  ASP A  21       7.972   4.038  -6.313  1.00  0.73           C  
ATOM     79  C   ASP A  21       7.168   4.870  -5.374  1.00  0.64           C  
ATOM     80  O   ASP A  21       7.424   4.986  -4.177  1.00  0.66           O  
ATOM     81  N   THR A  22       6.138   5.502  -5.964  1.00  0.63           N  
ATOM     82  CA  THR A  22       5.217   6.318  -5.234  1.00  0.58           C  
ATOM     83  C   THR A  22       4.193   5.429  -4.619  1.00  0.53           C  
ATOM     84  O   THR A  22       4.093   4.256  -4.978  1.00  0.58           O  
ATOM     85  N   ILE A  23       3.384   5.945  -3.676  1.00  0.51           N  
ATOM     86  CA  ILE A  23       2.294   5.162  -3.181  1.00  0.48           C  
ATOM     87  C   ILE A  23       1.296   4.944  -4.266  1.00  0.48           C  
ATOM     88  O   ILE A  23       0.731   3.852  -4.273  1.00  0.51           O  
ATOM     89  N   GLU A  24       1.072   5.882  -5.203  1.00  0.50           N  
ATOM     90  CA  GLU A  24       0.353   5.649  -6.417  1.00  0.53           C  
ATOM     91  C   GLU A  24       0.832   4.527  -7.273  1.00  0.50           C  
ATOM     92  O   GLU A  24      -0.016   3.751  -7.713  1.00  0.55           O  
ATOM     93  N   ASN A  25       2.139   4.217  -7.337  1.00  0.51           N  
ATOM     94  CA  ASN A  25       2.698   3.098  -8.030  1.00  0.52           C  
ATOM     95  C   ASN A  25       2.404   1.842  -7.287  1.00  0.47           C  
ATOM     96  O   ASN A  25       2.163   0.795  -7.886  1.00  0.53           O  
ATOM     97  N   VAL A  26       2.388   1.892  -5.942  1.00  0.45           N  
ATOM     98  CA  VAL A  26       1.957   0.831  -5.087  1.00  0.44           C  
ATOM     99  C   VAL A  26       0.526   0.511  -5.352  1.00  0.40           C  
ATOM    100  O   VAL A  26       0.248  -0.656  -5.621  1.00  0.44           O  
ATOM    101  N   LYS A  27      -0.377   1.509  -5.343  1.00  0.40           N  
ATOM    102  CA  LYS A  27      -1.743   1.168  -5.592  1.00  0.41           C  
ATOM    103  C   LYS A  27      -2.032   0.676  -6.969  1.00  0.38           C  
ATOM    104  O   LYS A  27      -2.994  -0.047  -7.222  1.00  0.42           O  
ATOM    105  N   ALA A  28      -1.229   1.058  -7.978  1.00  0.39           N  
ATOM    106  CA  ALA A  28      -1.354   0.506  -9.291  1.00  0.39           C  
ATOM    107  C   ALA A  28      -0.914  -0.913  -9.412  1.00  0.36           C  
ATOM    108  O   ALA A  28      -1.398  -1.689 -10.235  1.00  0.42           O  
ATOM    109  N   LYS A  29       0.134  -1.329  -8.678  1.00  0.39           N  
ATOM    110  CA  LYS A  29       0.457  -2.721  -8.707  1.00  0.43           C  
ATOM    111  C   LYS A  29      -0.613  -3.579  -8.126  1.00  0.44           C  
ATOM    112  O   LYS A  29      -0.929  -4.634  -8.675  1.00  0.54           O  
ATOM    113  N   ILE A  30      -1.394  -3.078  -7.152  1.00  0.41           N  
ATOM    114  CA  ILE A  30      -2.574  -3.720  -6.660  1.00  0.44           C  
ATOM    115  C   ILE A  30      -3.655  -3.712  -7.685  1.00  0.45           C  
ATOM    116  O   ILE A  30      -4.371  -4.702  -7.823  1.00  0.56           O  
ATOM    117  N   GLN A  31      -3.811  -2.652  -8.498  1.00  0.41           N  
ATOM    118  CA  GLN A  31      -4.812  -2.588  -9.518  1.00  0.48           C  
ATOM    119  C   GLN A  31      -4.499  -3.581 -10.585  1.00  0.52           C  
ATOM    120  O   GLN A  31      -5.381  -4.261 -11.107  1.00  0.66           O  
ATOM    121  N   ASP A  32      -3.222  -3.728 -10.982  1.00  0.50           N  
ATOM    122  CA  ASP A  32      -2.781  -4.722 -11.911  1.00  0.60           C  
ATOM    123  C   ASP A  32      -3.073  -6.102 -11.430  1.00  0.65           C  
ATOM    124  O   ASP A  32      -3.689  -6.907 -12.127  1.00  0.81           O  
ATOM    125  N   LYS A  33      -2.645  -6.444 -10.201  1.00  0.62           N  
ATOM    126  CA  LYS A  33      -2.736  -7.773  -9.684  1.00  0.73           C  
ATOM    127  C   LYS A  33      -4.144  -8.171  -9.401  1.00  0.69           C  
ATOM    128  O   LYS A  33      -4.660  -9.203  -9.829  1.00  0.83           O  
ATOM    129  N   GLU A  34      -4.826  -7.425  -8.513  1.00  0.63           N  
ATOM    130  CA  GLU A  34      -5.995  -7.892  -7.837  1.00  0.67           C  
ATOM    131  C   GLU A  34      -7.217  -7.294  -8.444  1.00  0.69           C  
ATOM    132  O   GLU A  34      -8.254  -7.953  -8.370  1.00  0.95           O  
ATOM    133  N   GLY A  35      -7.206  -6.089  -9.040  1.00  0.63           N  
ATOM    134  CA  GLY A  35      -8.344  -5.449  -9.622  1.00  0.68           C  
ATOM    135  C   GLY A  35      -9.120  -4.563  -8.710  1.00  0.76           C  
ATOM    136  O   GLY A  35     -10.350  -4.543  -8.667  1.00  1.12           O  
ATOM    137  N   ILE A  36      -8.392  -3.797  -7.878  1.00  0.70           N  
ATOM    138  CA  ILE A  36      -8.901  -2.945  -6.849  1.00  0.76           C  
ATOM    139  C   ILE A  36      -8.529  -1.570  -7.287  1.00  0.71           C  
ATOM    140  O   ILE A  36      -7.338  -1.286  -7.413  1.00  0.73           O  
ATOM    141  N   PRO A  37      -9.387  -0.629  -7.547  1.00  0.75           N  
ATOM    142  CA  PRO A  37      -8.975   0.648  -8.054  1.00  0.79           C  
ATOM    143  C   PRO A  37      -8.334   1.528  -7.037  1.00  0.75           C  
ATOM    144  O   PRO A  37      -8.740   1.421  -5.882  1.00  0.75           O  
ATOM    145  N   PRO A  38      -7.358   2.335  -7.337  1.00  0.81           N  
ATOM    146  CA  PRO A  38      -6.629   3.153  -6.413  1.00  0.85           C  
ATOM    147  C   PRO A  38      -7.430   4.257  -5.811  1.00  0.89           C  
ATOM    148  O   PRO A  38      -7.018   4.721  -4.749  1.00  0.99           O  
ATOM    149  N   ASP A  39      -8.549   4.688  -6.420  1.00  0.96           N  
ATOM    150  CA  ASP A  39      -9.452   5.648  -5.864  1.00  1.11           C  
ATOM    151  C   ASP A  39      -9.803   5.310  -4.457  1.00  1.00           C  
ATOM    152  O   ASP A  39      -9.848   6.140  -3.551  1.00  1.14           O  
ATOM    153  N   GLN A  40     -10.264   4.060  -4.269  1.00  0.87           N  
ATOM    154  CA  GLN A  40     -10.659   3.596  -2.975  1.00  0.84           C  
ATOM    155  C   GLN A  40      -9.612   3.192  -1.995  1.00  0.67           C  
ATOM    156  O   GLN A  40      -9.801   3.110  -0.783  1.00  0.80           O  
ATOM    157  N   GLN A  41      -8.436   2.799  -2.517  1.00  0.56           N  
ATOM    158  CA  GLN A  41      -7.333   2.297  -1.757  1.00  0.51           C  
ATOM    159  C   GLN A  41      -6.728   3.325  -0.863  1.00  0.49           C  
ATOM    160  O   GLN A  41      -6.597   4.508  -1.171  1.00  0.65           O  
ATOM    161  N   ARG A  42      -6.320   2.926   0.355  1.00  0.47           N  
ATOM    162  CA  ARG A  42      -5.570   3.691   1.303  1.00  0.55           C  
ATOM    163  C   ARG A  42      -4.478   2.862   1.886  1.00  0.46           C  
ATOM    164  O   ARG A  42      -4.808   1.754   2.305  1.00  0.52           O  
ATOM    165  N   LEU A  43      -3.198   3.272   1.828  1.00  0.46           N  
ATOM    166  CA  LEU A  43      -2.159   2.530   2.473  1.00  0.42           C  
ATOM    167  C   LEU A  43      -1.895   3.018   3.855  1.00  0.43           C  
ATOM    168  O   LEU A  43      -1.748   4.228   4.019  1.00  0.55           O  
ATOM    169  N   ILE A  44      -1.978   2.140   4.870  1.00  0.42           N  
ATOM    170  CA  ILE A  44      -1.653   2.456   6.227  1.00  0.46           C  
ATOM    171  C   ILE A  44      -0.364   1.795   6.576  1.00  0.42           C  
ATOM    172  O   ILE A  44      -0.143   0.611   6.323  1.00  0.53           O  
ATOM    173  N   PHE A  45       0.590   2.568   7.125  1.00  0.42           N  
ATOM    174  CA  PHE A  45       1.785   2.039   7.705  1.00  0.46           C  
ATOM    175  C   PHE A  45       2.171   2.762   8.950  1.00  0.68           C  
ATOM    176  O   PHE A  45       2.435   3.963   8.927  1.00  1.50           O  
ATOM    177  N   ALA A  46       2.385   1.910   9.969  1.00  0.81           N  
ATOM    178  CA  ALA A  46       2.671   2.239  11.330  1.00  0.96           C  
ATOM    179  C   ALA A  46       1.629   3.114  11.938  1.00  0.97           C  
ATOM    180  O   ALA A  46       1.922   3.832  12.893  1.00  1.21           O  
ATOM    181  N   GLY A  47       0.431   3.201  11.331  1.00  0.99           N  
ATOM    182  CA  GLY A  47      -0.563   4.154  11.716  1.00  1.10           C  
ATOM    183  C   GLY A  47      -0.670   5.355  10.841  1.00  1.03           C  
ATOM    184  O   GLY A  47      -1.591   6.092  11.190  1.00  1.30           O  
ATOM    185  N   LYS A  48       0.175   5.668   9.843  1.00  0.98           N  
ATOM    186  CA  LYS A  48       0.082   6.782   8.951  1.00  1.05           C  
ATOM    187  C   LYS A  48      -0.444   6.386   7.614  1.00  0.84           C  
ATOM    188  O   LYS A  48       0.010   5.396   7.043  1.00  0.81           O  
ATOM    189  N   GLN A  49      -1.439   7.157   7.140  1.00  0.84           N  
ATOM    190  CA  GLN A  49      -2.011   6.956   5.846  1.00  0.80           C  
ATOM    191  C   GLN A  49      -1.059   7.571   4.878  1.00  0.72           C  
ATOM    192  O   GLN A  49      -0.608   8.713   4.942  1.00  0.83           O  
ATOM    193  N   LEU A  50      -0.663   6.718   3.916  1.00  0.69           N  
ATOM    194  CA  LEU A  50       0.378   7.017   2.982  1.00  0.66           C  
ATOM    195  C   LEU A  50      -0.196   7.784   1.842  1.00  0.72           C  
ATOM    196  O   LEU A  50      -1.212   7.352   1.301  1.00  0.90           O  
ATOM    197  N   GLU A  51       0.381   8.929   1.433  1.00  0.70           N  
ATOM    198  CA  GLU A  51      -0.114   9.786   0.401  1.00  0.76           C  
ATOM    199  C   GLU A  51       0.338   9.490  -0.987  1.00  0.77           C  
ATOM    200  O   GLU A  51       1.529   9.269  -1.201  1.00  1.23           O  
ATOM    201  N   ASP A  52      -0.464   9.647  -2.055  1.00  0.66           N  
ATOM    202  CA  ASP A  52      -0.188   9.198  -3.385  1.00  0.65           C  
ATOM    203  C   ASP A  52       0.936   9.732  -4.204  1.00  0.60           C  
ATOM    204  O   ASP A  52       1.757   9.025  -4.786  1.00  0.62           O  
ATOM    205  N   GLY A  53       1.250  11.037  -4.117  1.00  0.68           N  
ATOM    206  CA  GLY A  53       2.414  11.665  -4.661  1.00  0.73           C  
ATOM    207  C   GLY A  53       3.665  11.639  -3.851  1.00  0.72           C  
ATOM    208  O   GLY A  53       4.614  12.363  -4.148  1.00  0.97           O  
ATOM    209  N   ARG A  54       3.645  10.839  -2.769  1.00  0.64           N  
ATOM    210  CA  ARG A  54       4.833  10.606  -2.008  1.00  0.63           C  
ATOM    211  C   ARG A  54       5.336   9.223  -2.243  1.00  0.59           C  
ATOM    212  O   ARG A  54       4.636   8.292  -2.637  1.00  0.62           O  
ATOM    213  N   THR A  55       6.663   9.061  -2.096  1.00  0.63           N  
ATOM    214  CA  THR A  55       7.323   7.802  -2.249  1.00  0.61           C  
ATOM    215  C   THR A  55       7.540   6.952  -1.045  1.00  0.59           C  
ATOM    216  O   THR A  55       7.457   7.311   0.129  1.00  0.64           O  
ATOM    217  N   LEU A  56       7.917   5.677  -1.249  1.00  0.58           N  
ATOM    218  CA  LEU A  56       8.350   4.777  -0.225  1.00  0.59           C  
ATOM    219  C   LEU A  56       9.590   5.109   0.532  1.00  0.64           C  
ATOM    220  O   LEU A  56       9.690   4.728   1.697  1.00  0.70           O  
ATOM    221  N   SER A  57      10.526   5.924   0.013  1.00  0.68           N  
ATOM    222  CA  SER A  57      11.648   6.419   0.749  1.00  0.75           C  
ATOM    223  C   SER A  57      11.333   7.574   1.636  1.00  0.76           C  
ATOM    224  O   SER A  57      11.889   7.790   2.713  1.00  0.84           O  
ATOM    225  N   ASP A  58      10.368   8.410   1.217  1.00  0.75           N  
ATOM    226  CA  ASP A  58       9.820   9.473   2.001  1.00  0.78           C  
ATOM    227  C   ASP A  58       9.187   8.991   3.261  1.00  0.77           C  
ATOM    228  O   ASP A  58       9.245   9.724   4.247  1.00  0.86           O  
ATOM    229  N   TYR A  59       8.515   7.831   3.361  1.00  0.72           N  
ATOM    230  CA  TYR A  59       8.088   7.279   4.609  1.00  0.73           C  
ATOM    231  C   TYR A  59       9.080   6.295   5.131  1.00  0.76           C  
ATOM    232  O   TYR A  59       8.770   5.464   5.983  1.00  0.89           O  
ATOM    233  N   ASN A  60      10.331   6.335   4.641  1.00  0.74           N  
ATOM    234  CA  ASN A  60      11.447   5.485   4.922  1.00  0.79           C  
ATOM    235  C   ASN A  60      11.217   4.015   4.988  1.00  0.75           C  
ATOM    236  O   ASN A  60      11.644   3.274   5.873  1.00  0.86           O  
ATOM    237  N   ILE A  61      10.514   3.473   3.977  1.00  0.67           N  
ATOM    238  CA  ILE A  61      10.163   2.091   3.877  1.00  0.65           C  
ATOM    239  C   ILE A  61      11.141   1.221   3.165  1.00  0.66           C  
ATOM    240  O   ILE A  61      11.317   1.450   1.969  1.00  0.75           O  
ATOM    241  N   GLN A  62      11.805   0.219   3.768  1.00  0.67           N  
ATOM    242  CA  GLN A  62      12.698  -0.772   3.254  1.00  0.70           C  
ATOM    243  C   GLN A  62      11.930  -2.039   3.095  1.00  0.62           C  
ATOM    244  O   GLN A  62      10.722  -2.097   3.319  1.00  0.64           O  
ATOM    245  N   LYS A  63      12.560  -3.157   2.690  1.00  0.64           N  
ATOM    246  CA  LYS A  63      11.971  -4.451   2.542  1.00  0.62           C  
ATOM    247  C   LYS A  63      11.361  -5.006   3.783  1.00  0.59           C  
ATOM    248  O   LYS A  63      11.748  -4.638   4.892  1.00  0.66           O  
ATOM    249  N   GLU A  64      10.443  -5.971   3.597  1.00  0.57           N  
ATOM    250  CA  GLU A  64       9.883  -6.815   4.606  1.00  0.58           C  
ATOM    251  C   GLU A  64       8.951  -6.046   5.477  1.00  0.56           C  
ATOM    252  O   GLU A  64       8.825  -6.433   6.639  1.00  0.70           O  
ATOM    253  N   SER A  65       8.320  -4.973   4.967  1.00  0.51           N  
ATOM    254  CA  SER A  65       7.521  -4.083   5.749  1.00  0.51           C  
ATOM    255  C   SER A  65       6.062  -4.386   5.714  1.00  0.43           C  
ATOM    256  O   SER A  65       5.377  -4.502   4.698  1.00  0.50           O  
ATOM    257  N   THR A  66       5.341  -4.365   6.848  1.00  0.45           N  
ATOM    258  CA  THR A  66       3.972  -4.779   6.872  1.00  0.45           C  
ATOM    259  C   THR A  66       3.181  -3.527   6.707  1.00  0.43           C  
ATOM    260  O   THR A  66       3.127  -2.697   7.613  1.00  0.58           O  
ATOM    261  N   LEU A  67       2.565  -3.395   5.518  1.00  0.38           N  
ATOM    262  CA  LEU A  67       1.602  -2.384   5.208  1.00  0.38           C  
ATOM    263  C   LEU A  67       0.261  -3.009   5.382  1.00  0.37           C  
ATOM    264  O   LEU A  67      -0.012  -4.208   5.350  1.00  0.50           O  
ATOM    265  N   HIS A  68      -0.737  -2.127   5.569  1.00  0.35           N  
ATOM    266  CA  HIS A  68      -2.081  -2.554   5.810  1.00  0.37           C  
ATOM    267  C   HIS A  68      -2.912  -1.709   4.907  1.00  0.35           C  
ATOM    268  O   HIS A  68      -2.750  -0.495   4.791  1.00  0.48           O  
ATOM    269  N   LEU A  69      -3.656  -2.404   4.029  1.00  0.36           N  
ATOM    270  CA  LEU A  69      -4.461  -1.779   3.025  1.00  0.38           C  
ATOM    271  C   LEU A  69      -5.797  -1.550   3.643  1.00  0.41           C  
ATOM    272  O   LEU A  69      -6.317  -2.473   4.269  1.00  0.56           O  
ATOM    273  N   VAL A  70      -6.316  -0.321   3.480  1.00  0.45           N  
ATOM    274  CA  VAL A  70      -7.560   0.195   3.962  1.00  0.56           C  
ATOM    275  C   VAL A  70      -8.232   0.461   2.659  1.00  0.55           C  
ATOM    276  O   VAL A  70      -7.713   0.996   1.680  1.00  0.58           O  
TER
ENDMDL
MODEL      7
ATOM      1  N   GLN A   2      11.121  -6.128  -1.297  1.00  0.59           N  
ATOM      2  CA  GLN A   2       9.909  -6.856  -1.083  1.00  0.56           C  
ATOM      3  C   GLN A   2       9.137  -6.282   0.054  1.00  0.50           C  
ATOM      4  O   GLN A   2       9.659  -6.064   1.146  1.00  0.60           O  
ATOM      5  N   ILE A   3       7.873  -5.890  -0.188  1.00  0.44           N  
ATOM      6  CA  ILE A   3       7.046  -5.479   0.904  1.00  0.42           C  
ATOM      7  C   ILE A   3       5.780  -6.265   0.936  1.00  0.40           C  
ATOM      8  O   ILE A   3       5.371  -6.841  -0.070  1.00  0.50           O  
ATOM      9  N   PHE A   4       5.108  -6.306   2.101  1.00  0.37           N  
ATOM     10  CA  PHE A   4       3.892  -7.034   2.291  1.00  0.38           C  
ATOM     11  C   PHE A   4       2.735  -6.103   2.410  1.00  0.39           C  
ATOM     12  O   PHE A   4       2.746  -5.170   3.210  1.00  0.60           O  
ATOM     13  N   VAL A   5       1.647  -6.278   1.638  1.00  0.35           N  
ATOM     14  CA  VAL A   5       0.385  -5.612   1.708  1.00  0.35           C  
ATOM     15  C   VAL A   5      -0.585  -6.581   2.290  1.00  0.35           C  
ATOM     16  O   VAL A   5      -0.900  -7.572   1.632  1.00  0.46           O  
ATOM     17  N   LYS A   6      -0.982  -6.317   3.548  1.00  0.36           N  
ATOM     18  CA  LYS A   6      -1.947  -7.032   4.325  1.00  0.39           C  
ATOM     19  C   LYS A   6      -3.224  -6.268   4.395  1.00  0.46           C  
ATOM     20  O   LYS A   6      -3.367  -5.050   4.484  1.00  0.53           O  
ATOM     21  N   THR A   7      -4.343  -6.967   4.136  1.00  0.58           N  
ATOM     22  CA  THR A   7      -5.677  -6.450   4.143  1.00  0.78           C  
ATOM     23  C   THR A   7      -6.307  -6.831   5.439  1.00  0.94           C  
ATOM     24  O   THR A   7      -5.771  -7.675   6.155  1.00  0.99           O  
ATOM     25  N   LEU A   8      -7.432  -6.176   5.781  1.00  1.17           N  
ATOM     26  CA  LEU A   8      -8.167  -6.535   6.954  1.00  1.39           C  
ATOM     27  C   LEU A   8      -9.087  -7.662   6.634  1.00  1.44           C  
ATOM     28  O   LEU A   8      -9.781  -8.178   7.509  1.00  1.60           O  
ATOM     29  N   THR A   9      -9.223  -8.166   5.394  1.00  1.41           N  
ATOM     30  CA  THR A   9     -10.152  -9.183   5.014  1.00  1.51           C  
ATOM     31  C   THR A   9      -9.558 -10.541   5.159  1.00  1.37           C  
ATOM     32  O   THR A   9     -10.296 -11.480   5.458  1.00  1.62           O  
ATOM     33  N   GLY A  10      -8.231 -10.687   5.000  1.00  1.18           N  
ATOM     34  CA  GLY A  10      -7.552 -11.927   5.214  1.00  1.22           C  
ATOM     35  C   GLY A  10      -6.731 -12.410   4.068  1.00  0.99           C  
ATOM     36  O   GLY A  10      -6.865 -13.504   3.522  1.00  1.31           O  
ATOM     37  N   LYS A  11      -5.844 -11.492   3.646  1.00  0.73           N  
ATOM     38  CA  LYS A  11      -5.044 -11.683   2.476  1.00  0.60           C  
ATOM     39  C   LYS A  11      -3.802 -10.877   2.647  1.00  0.51           C  
ATOM     40  O   LYS A  11      -3.978  -9.730   3.056  1.00  0.63           O  
ATOM     41  N   THR A  12      -2.647 -11.446   2.261  1.00  0.49           N  
ATOM     42  CA  THR A  12      -1.396 -10.754   2.312  1.00  0.48           C  
ATOM     43  C   THR A  12      -0.749 -11.103   1.016  1.00  0.52           C  
ATOM     44  O   THR A  12      -0.821 -12.263   0.614  1.00  0.72           O  
ATOM     45  N   ILE A  13      -0.244 -10.082   0.299  1.00  0.48           N  
ATOM     46  CA  ILE A  13       0.400 -10.202  -0.972  1.00  0.55           C  
ATOM     47  C   ILE A  13       1.728  -9.529  -0.895  1.00  0.51           C  
ATOM     48  O   ILE A  13       1.978  -8.593  -0.136  1.00  0.56           O  
ATOM     49  N   THR A  14       2.619 -10.030  -1.768  1.00  0.55           N  
ATOM     50  CA  THR A  14       3.963  -9.547  -1.826  1.00  0.54           C  
ATOM     51  C   THR A  14       4.216  -8.767  -3.070  1.00  0.55           C  
ATOM     52  O   THR A  14       4.180  -9.367  -4.143  1.00  0.72           O  
ATOM     53  N   LEU A  15       4.371  -7.440  -2.915  1.00  0.50           N  
ATOM     54  CA  LEU A  15       4.716  -6.556  -3.985  1.00  0.55           C  
ATOM     55  C   LEU A  15       6.204  -6.511  -4.026  1.00  0.52           C  
ATOM     56  O   LEU A  15       6.960  -6.803  -3.100  1.00  0.58           O  
ATOM     57  N   GLU A  16       6.731  -6.225  -5.229  1.00  0.59           N  
ATOM     58  CA  GLU A  16       8.134  -6.024  -5.420  1.00  0.63           C  
ATOM     59  C   GLU A  16       8.306  -4.708  -6.098  1.00  0.65           C  
ATOM     60  O   GLU A  16       7.942  -4.475  -7.250  1.00  0.81           O  
ATOM     61  N   VAL A  17       8.917  -3.769  -5.353  1.00  0.61           N  
ATOM     62  CA  VAL A  17       9.101  -2.387  -5.671  1.00  0.63           C  
ATOM     63  C   VAL A  17      10.537  -2.049  -5.458  1.00  0.65           C  
ATOM     64  O   VAL A  17      11.354  -2.966  -5.378  1.00  0.76           O  
ATOM     65  N   GLU A  18      10.811  -0.735  -5.393  1.00  0.68           N  
ATOM     66  CA  GLU A  18      12.058  -0.294  -4.850  1.00  0.74           C  
ATOM     67  C   GLU A  18      11.760   0.741  -3.821  1.00  0.71           C  
ATOM     68  O   GLU A  18      10.595   1.097  -3.652  1.00  0.74           O  
ATOM     69  N   PRO A  19      12.705   1.186  -3.046  1.00  0.74           N  
ATOM     70  CA  PRO A  19      12.351   2.081  -1.983  1.00  0.74           C  
ATOM     71  C   PRO A  19      11.953   3.412  -2.520  1.00  0.70           C  
ATOM     72  O   PRO A  19      11.297   4.230  -1.877  1.00  0.74           O  
ATOM     73  N   SER A  20      12.333   3.663  -3.787  1.00  0.70           N  
ATOM     74  CA  SER A  20      11.989   4.858  -4.492  1.00  0.74           C  
ATOM     75  C   SER A  20      10.700   4.778  -5.234  1.00  0.71           C  
ATOM     76  O   SER A  20      10.281   5.744  -5.870  1.00  0.80           O  
ATOM     77  N   ASP A  21       9.939   3.671  -5.166  1.00  0.70           N  
ATOM     78  CA  ASP A  21       8.668   3.662  -5.822  1.00  0.73           C  
ATOM     79  C   ASP A  21       7.686   4.462  -5.038  1.00  0.64           C  
ATOM     80  O   ASP A  21       7.683   4.500  -3.808  1.00  0.66           O  
ATOM     81  N   THR A  22       6.804   5.230  -5.703  1.00  0.63           N  
ATOM     82  CA  THR A  22       5.781   6.079  -5.177  1.00  0.58           C  
ATOM     83  C   THR A  22       4.643   5.249  -4.692  1.00  0.53           C  
ATOM     84  O   THR A  22       4.518   4.086  -5.070  1.00  0.58           O  
ATOM     85  N   ILE A  23       3.750   5.840  -3.877  1.00  0.51           N  
ATOM     86  CA  ILE A  23       2.558   5.221  -3.386  1.00  0.48           C  
ATOM     87  C   ILE A  23       1.602   4.984  -4.504  1.00  0.48           C  
ATOM     88  O   ILE A  23       0.939   3.957  -4.638  1.00  0.51           O  
ATOM     89  N   GLU A  24       1.600   5.895  -5.494  1.00  0.50           N  
ATOM     90  CA  GLU A  24       1.045   5.744  -6.803  1.00  0.53           C  
ATOM     91  C   GLU A  24       1.457   4.536  -7.573  1.00  0.50           C  
ATOM     92  O   GLU A  24       0.640   3.815  -8.142  1.00  0.55           O  
ATOM     93  N   ASN A  25       2.769   4.240  -7.580  1.00  0.51           N  
ATOM     94  CA  ASN A  25       3.270   3.033  -8.159  1.00  0.52           C  
ATOM     95  C   ASN A  25       2.921   1.739  -7.508  1.00  0.47           C  
ATOM     96  O   ASN A  25       2.838   0.671  -8.111  1.00  0.53           O  
ATOM     97  N   VAL A  26       2.706   1.768  -6.180  1.00  0.45           N  
ATOM     98  CA  VAL A  26       2.295   0.685  -5.343  1.00  0.44           C  
ATOM     99  C   VAL A  26       0.849   0.413  -5.581  1.00  0.40           C  
ATOM    100  O   VAL A  26       0.480  -0.732  -5.838  1.00  0.44           O  
ATOM    101  N   LYS A  27      -0.035   1.424  -5.653  1.00  0.40           N  
ATOM    102  CA  LYS A  27      -1.421   1.332  -5.989  1.00  0.41           C  
ATOM    103  C   LYS A  27      -1.649   0.832  -7.374  1.00  0.38           C  
ATOM    104  O   LYS A  27      -2.568   0.028  -7.519  1.00  0.42           O  
ATOM    105  N   ALA A  28      -0.837   1.232  -8.370  1.00  0.39           N  
ATOM    106  CA  ALA A  28      -0.920   0.806  -9.732  1.00  0.39           C  
ATOM    107  C   ALA A  28      -0.551  -0.625  -9.926  1.00  0.36           C  
ATOM    108  O   ALA A  28      -1.212  -1.343 -10.674  1.00  0.42           O  
ATOM    109  N   LYS A  29       0.382  -1.205  -9.148  1.00  0.39           N  
ATOM    110  CA  LYS A  29       0.643  -2.603  -9.015  1.00  0.43           C  
ATOM    111  C   LYS A  29      -0.537  -3.343  -8.485  1.00  0.44           C  
ATOM    112  O   LYS A  29      -1.036  -4.314  -9.051  1.00  0.54           O  
ATOM    113  N   ILE A  30      -1.084  -2.945  -7.323  1.00  0.41           N  
ATOM    114  CA  ILE A  30      -2.298  -3.490  -6.799  1.00  0.44           C  
ATOM    115  C   ILE A  30      -3.454  -3.448  -7.738  1.00  0.45           C  
ATOM    116  O   ILE A  30      -4.223  -4.406  -7.791  1.00  0.56           O  
ATOM    117  N   GLN A  31      -3.582  -2.335  -8.483  1.00  0.41           N  
ATOM    118  CA  GLN A  31      -4.616  -2.115  -9.446  1.00  0.48           C  
ATOM    119  C   GLN A  31      -4.660  -3.128 -10.539  1.00  0.52           C  
ATOM    120  O   GLN A  31      -5.710  -3.614 -10.957  1.00  0.66           O  
ATOM    121  N   ASP A  32      -3.468  -3.547 -10.999  1.00  0.50           N  
ATOM    122  CA  ASP A  32      -3.351  -4.594 -11.966  1.00  0.60           C  
ATOM    123  C   ASP A  32      -3.724  -5.908 -11.367  1.00  0.65           C  
ATOM    124  O   ASP A  32      -4.569  -6.616 -11.911  1.00  0.81           O  
ATOM    125  N   LYS A  33      -3.134  -6.381 -10.254  1.00  0.62           N  
ATOM    126  CA  LYS A  33      -3.384  -7.675  -9.699  1.00  0.73           C  
ATOM    127  C   LYS A  33      -4.802  -7.678  -9.240  1.00  0.69           C  
ATOM    128  O   LYS A  33      -5.677  -8.300  -9.841  1.00  0.83           O  
ATOM    129  N   GLU A  34      -5.117  -7.028  -8.106  1.00  0.63           N  
ATOM    130  CA  GLU A  34      -6.306  -7.174  -7.325  1.00  0.67           C  
ATOM    131  C   GLU A  34      -7.480  -6.455  -7.896  1.00  0.69           C  
ATOM    132  O   GLU A  34      -8.598  -6.871  -7.598  1.00  0.95           O  
ATOM    133  N   GLY A  35      -7.260  -5.387  -8.683  1.00  0.63           N  
ATOM    134  CA  GLY A  35      -8.302  -4.792  -9.462  1.00  0.68           C  
ATOM    135  C   GLY A  35      -8.910  -3.649  -8.725  1.00  0.76           C  
ATOM    136  O   GLY A  35     -10.030  -3.297  -9.092  1.00  1.12           O  
ATOM    137  N   ILE A  36      -8.357  -3.120  -7.619  1.00  0.70           N  
ATOM    138  CA  ILE A  36      -8.892  -2.085  -6.790  1.00  0.76           C  
ATOM    139  C   ILE A  36      -8.438  -0.770  -7.325  1.00  0.71           C  
ATOM    140  O   ILE A  36      -7.232  -0.567  -7.451  1.00  0.73           O  
ATOM    141  N   PRO A  37      -9.267   0.189  -7.613  1.00  0.75           N  
ATOM    142  CA  PRO A  37      -8.874   1.451  -8.168  1.00  0.79           C  
ATOM    143  C   PRO A  37      -8.096   2.227  -7.162  1.00  0.75           C  
ATOM    144  O   PRO A  37      -8.154   1.900  -5.979  1.00  0.75           O  
ATOM    145  N   PRO A  38      -7.301   3.217  -7.444  1.00  0.81           N  
ATOM    146  CA  PRO A  38      -6.516   3.699  -6.345  1.00  0.85           C  
ATOM    147  C   PRO A  38      -7.201   4.626  -5.402  1.00  0.89           C  
ATOM    148  O   PRO A  38      -6.664   5.016  -4.367  1.00  0.99           O  
ATOM    149  N   ASP A  39      -8.432   5.066  -5.723  1.00  0.96           N  
ATOM    150  CA  ASP A  39      -9.190   5.883  -4.828  1.00  1.11           C  
ATOM    151  C   ASP A  39      -9.866   4.993  -3.842  1.00  1.00           C  
ATOM    152  O   ASP A  39     -10.241   5.391  -2.741  1.00  1.14           O  
ATOM    153  N   GLN A  40     -10.067   3.703  -4.166  1.00  0.87           N  
ATOM    154  CA  GLN A  40     -10.785   2.765  -3.361  1.00  0.84           C  
ATOM    155  C   GLN A  40      -9.975   2.199  -2.246  1.00  0.67           C  
ATOM    156  O   GLN A  40     -10.543   1.802  -1.230  1.00  0.80           O  
ATOM    157  N   GLN A  41      -8.634   2.245  -2.349  1.00  0.56           N  
ATOM    158  CA  GLN A  41      -7.763   1.635  -1.391  1.00  0.51           C  
ATOM    159  C   GLN A  41      -6.993   2.683  -0.664  1.00  0.49           C  
ATOM    160  O   GLN A  41      -6.493   3.626  -1.277  1.00  0.65           O  
ATOM    161  N   ARG A  42      -6.828   2.576   0.666  1.00  0.47           N  
ATOM    162  CA  ARG A  42      -5.968   3.438   1.417  1.00  0.55           C  
ATOM    163  C   ARG A  42      -4.927   2.604   2.080  1.00  0.46           C  
ATOM    164  O   ARG A  42      -5.282   1.572   2.648  1.00  0.52           O  
ATOM    165  N   LEU A  43      -3.640   2.988   2.019  1.00  0.46           N  
ATOM    166  CA  LEU A  43      -2.540   2.283   2.601  1.00  0.42           C  
ATOM    167  C   LEU A  43      -2.104   3.025   3.819  1.00  0.43           C  
ATOM    168  O   LEU A  43      -1.623   4.156   3.851  1.00  0.55           O  
ATOM    169  N   ILE A  44      -2.134   2.351   4.983  1.00  0.42           N  
ATOM    170  CA  ILE A  44      -1.811   2.798   6.302  1.00  0.46           C  
ATOM    171  C   ILE A  44      -0.563   2.095   6.712  1.00  0.42           C  
ATOM    172  O   ILE A  44      -0.433   0.876   6.626  1.00  0.53           O  
ATOM    173  N   PHE A  45       0.407   2.877   7.220  1.00  0.42           N  
ATOM    174  CA  PHE A  45       1.539   2.252   7.829  1.00  0.46           C  
ATOM    175  C   PHE A  45       1.604   2.822   9.206  1.00  0.68           C  
ATOM    176  O   PHE A  45       1.839   4.013   9.402  1.00  1.50           O  
ATOM    177  N   ALA A  46       1.478   1.972  10.239  1.00  0.81           N  
ATOM    178  CA  ALA A  46       1.340   2.235  11.639  1.00  0.96           C  
ATOM    179  C   ALA A  46       0.063   2.945  11.931  1.00  0.97           C  
ATOM    180  O   ALA A  46      -0.980   2.315  12.106  1.00  1.21           O  
ATOM    181  N   GLY A  47       0.141   4.287  11.879  1.00  0.99           N  
ATOM    182  CA  GLY A  47      -0.917   5.220  12.108  1.00  1.10           C  
ATOM    183  C   GLY A  47      -1.301   6.127  10.990  1.00  1.03           C  
ATOM    184  O   GLY A  47      -2.405   6.669  10.949  1.00  1.30           O  
ATOM    185  N   LYS A  48      -0.384   6.322  10.026  1.00  0.98           N  
ATOM    186  CA  LYS A  48      -0.450   7.252   8.943  1.00  1.05           C  
ATOM    187  C   LYS A  48      -0.754   6.645   7.616  1.00  0.84           C  
ATOM    188  O   LYS A  48      -0.208   5.612   7.230  1.00  0.81           O  
ATOM    189  N   GLN A  49      -1.713   7.273   6.913  1.00  0.84           N  
ATOM    190  CA  GLN A  49      -2.011   6.972   5.547  1.00  0.80           C  
ATOM    191  C   GLN A  49      -0.994   7.539   4.618  1.00  0.72           C  
ATOM    192  O   GLN A  49      -0.451   8.597   4.931  1.00  0.83           O  
ATOM    193  N   LEU A  50      -0.711   6.810   3.523  1.00  0.69           N  
ATOM    194  CA  LEU A  50       0.372   7.201   2.674  1.00  0.66           C  
ATOM    195  C   LEU A  50      -0.073   7.977   1.484  1.00  0.72           C  
ATOM    196  O   LEU A  50      -1.165   7.755   0.963  1.00  0.90           O  
ATOM    197  N   GLU A  51       0.678   8.989   1.013  1.00  0.70           N  
ATOM    198  CA  GLU A  51       0.345   9.853  -0.076  1.00  0.76           C  
ATOM    199  C   GLU A  51       0.909   9.480  -1.404  1.00  0.77           C  
ATOM    200  O   GLU A  51       2.024   8.965  -1.474  1.00  1.23           O  
ATOM    201  N   ASP A  52       0.119   9.534  -2.492  1.00  0.66           N  
ATOM    202  CA  ASP A  52       0.438   9.097  -3.815  1.00  0.65           C  
ATOM    203  C   ASP A  52       1.737   9.481  -4.438  1.00  0.60           C  
ATOM    204  O   ASP A  52       2.628   8.639  -4.534  1.00  0.62           O  
ATOM    205  N   GLY A  53       1.985  10.769  -4.732  1.00  0.68           N  
ATOM    206  CA  GLY A  53       3.289  11.210  -5.117  1.00  0.73           C  
ATOM    207  C   GLY A  53       4.340  11.340  -4.068  1.00  0.72           C  
ATOM    208  O   GLY A  53       5.098  12.310  -4.048  1.00  0.97           O  
ATOM    209  N   ARG A  54       4.546  10.262  -3.293  1.00  0.64           N  
ATOM    210  CA  ARG A  54       5.618  10.167  -2.351  1.00  0.63           C  
ATOM    211  C   ARG A  54       6.242   8.822  -2.499  1.00  0.59           C  
ATOM    212  O   ARG A  54       5.500   7.912  -2.866  1.00  0.62           O  
ATOM    213  N   THR A  55       7.504   8.609  -2.086  1.00  0.63           N  
ATOM    214  CA  THR A  55       8.150   7.335  -2.143  1.00  0.61           C  
ATOM    215  C   THR A  55       7.953   6.477  -0.940  1.00  0.59           C  
ATOM    216  O   THR A  55       7.424   6.874   0.098  1.00  0.64           O  
ATOM    217  N   LEU A  56       8.391   5.206  -0.935  1.00  0.58           N  
ATOM    218  CA  LEU A  56       8.478   4.337   0.197  1.00  0.59           C  
ATOM    219  C   LEU A  56       9.588   4.725   1.112  1.00  0.64           C  
ATOM    220  O   LEU A  56       9.405   4.649   2.326  1.00  0.70           O  
ATOM    221  N   SER A  57      10.747   5.161   0.587  1.00  0.68           N  
ATOM    222  CA  SER A  57      11.893   5.709   1.243  1.00  0.75           C  
ATOM    223  C   SER A  57      11.575   6.917   2.056  1.00  0.76           C  
ATOM    224  O   SER A  57      12.106   7.154   3.140  1.00  0.84           O  
ATOM    225  N   ASP A  58      10.696   7.841   1.629  1.00  0.75           N  
ATOM    226  CA  ASP A  58      10.210   8.987   2.332  1.00  0.78           C  
ATOM    227  C   ASP A  58       9.515   8.622   3.599  1.00  0.77           C  
ATOM    228  O   ASP A  58       9.599   9.289   4.629  1.00  0.86           O  
ATOM    229  N   TYR A  59       8.844   7.458   3.615  1.00  0.72           N  
ATOM    230  CA  TYR A  59       8.102   6.905   4.706  1.00  0.73           C  
ATOM    231  C   TYR A  59       8.899   5.924   5.496  1.00  0.76           C  
ATOM    232  O   TYR A  59       8.473   5.198   6.392  1.00  0.89           O  
ATOM    233  N   ASN A  60      10.204   5.873   5.178  1.00  0.74           N  
ATOM    234  CA  ASN A  60      11.247   5.059   5.723  1.00  0.79           C  
ATOM    235  C   ASN A  60      10.797   3.639   5.758  1.00  0.75           C  
ATOM    236  O   ASN A  60      10.841   2.992   6.803  1.00  0.86           O  
ATOM    237  N   ILE A  61      10.216   3.110   4.665  1.00  0.67           N  
ATOM    238  CA  ILE A  61       9.751   1.763   4.545  1.00  0.65           C  
ATOM    239  C   ILE A  61      10.834   0.905   3.987  1.00  0.66           C  
ATOM    240  O   ILE A  61      11.323   1.053   2.869  1.00  0.75           O  
ATOM    241  N   GLN A  62      11.301  -0.043   4.819  1.00  0.67           N  
ATOM    242  CA  GLN A  62      12.367  -0.927   4.466  1.00  0.70           C  
ATOM    243  C   GLN A  62      11.736  -2.191   3.993  1.00  0.62           C  
ATOM    244  O   GLN A  62      10.532  -2.268   3.752  1.00  0.64           O  
ATOM    245  N   LYS A  63      12.560  -3.229   3.757  1.00  0.64           N  
ATOM    246  CA  LYS A  63      12.189  -4.541   3.326  1.00  0.62           C  
ATOM    247  C   LYS A  63      11.388  -5.298   4.328  1.00  0.59           C  
ATOM    248  O   LYS A  63      11.410  -5.090   5.541  1.00  0.66           O  
ATOM    249  N   GLU A  64      10.415  -6.105   3.866  1.00  0.57           N  
ATOM    250  CA  GLU A  64       9.540  -6.956   4.609  1.00  0.58           C  
ATOM    251  C   GLU A  64       8.506  -6.242   5.410  1.00  0.56           C  
ATOM    252  O   GLU A  64       8.029  -6.805   6.394  1.00  0.70           O  
ATOM    253  N   SER A  65       8.190  -4.965   5.132  1.00  0.51           N  
ATOM    254  CA  SER A  65       7.294  -4.119   5.858  1.00  0.51           C  
ATOM    255  C   SER A  65       5.845  -4.337   5.588  1.00  0.43           C  
ATOM    256  O   SER A  65       5.450  -4.572   4.448  1.00  0.50           O  
ATOM    257  N   THR A  66       4.987  -4.290   6.622  1.00  0.45           N  
ATOM    258  CA  THR A  66       3.578  -4.450   6.432  1.00  0.45           C  
ATOM    259  C   THR A  66       2.817  -3.190   6.197  1.00  0.43           C  
ATOM    260  O   THR A  66       2.515  -2.387   7.079  1.00  0.58           O  
ATOM    261  N   LEU A  67       2.431  -2.830   4.960  1.00  0.38           N  
ATOM    262  CA  LEU A  67       1.457  -1.805   4.754  1.00  0.38           C  
ATOM    263  C   LEU A  67       0.108  -2.395   4.978  1.00  0.37           C  
ATOM    264  O   LEU A  67      -0.212  -3.515   4.579  1.00  0.50           O  
ATOM    265  N   HIS A  68      -0.854  -1.652   5.554  1.00  0.35           N  
ATOM    266  CA  HIS A  68      -2.182  -2.128   5.791  1.00  0.37           C  
ATOM    267  C   HIS A  68      -3.163  -1.487   4.871  1.00  0.35           C  
ATOM    268  O   HIS A  68      -3.211  -0.261   4.788  1.00  0.48           O  
ATOM    269  N   LEU A  69      -3.742  -2.365   4.033  1.00  0.36           N  
ATOM    270  CA  LEU A  69      -4.670  -1.872   3.064  1.00  0.38           C  
ATOM    271  C   LEU A  69      -6.067  -1.898   3.585  1.00  0.41           C  
ATOM    272  O   LEU A  69      -6.622  -2.952   3.888  1.00  0.56           O  
ATOM    273  N   VAL A  70      -6.740  -0.737   3.667  1.00  0.45           N  
ATOM    274  CA  VAL A  70      -8.083  -0.638   4.146  1.00  0.56           C  
ATOM    275  C   VAL A  70      -8.834  -0.161   2.951  1.00  0.55           C  
ATOM    276  O   VAL A  70      -8.420   0.614   2.090  1.00  0.58           O  
TER
ENDMDL
MODEL      8
ATOM      1  N   GLN A   2      11.266  -6.114  -1.681  1.00  0.59           N  
ATOM      2  CA  GLN A   2       9.970  -6.713  -1.590  1.00  0.56           C  
ATOM      3  C   GLN A   2       9.239  -6.247  -0.378  1.00  0.50           C  
ATOM      4  O   GLN A   2       9.808  -6.177   0.709  1.00  0.60           O  
ATOM      5  N   ILE A   3       7.944  -5.903  -0.494  1.00  0.44           N  
ATOM      6  CA  ILE A   3       7.113  -5.570   0.623  1.00  0.42           C  
ATOM      7  C   ILE A   3       5.834  -6.331   0.553  1.00  0.40           C  
ATOM      8  O   ILE A   3       5.507  -7.002  -0.424  1.00  0.50           O  
ATOM      9  N   PHE A   4       5.048  -6.234   1.640  1.00  0.37           N  
ATOM     10  CA  PHE A   4       3.775  -6.869   1.785  1.00  0.38           C  
ATOM     11  C   PHE A   4       2.651  -5.916   2.013  1.00  0.39           C  
ATOM     12  O   PHE A   4       2.867  -4.841   2.570  1.00  0.60           O  
ATOM     13  N   VAL A   5       1.416  -6.196   1.561  1.00  0.35           N  
ATOM     14  CA  VAL A   5       0.270  -5.378   1.808  1.00  0.35           C  
ATOM     15  C   VAL A   5      -0.797  -6.333   2.219  1.00  0.35           C  
ATOM     16  O   VAL A   5      -1.052  -7.365   1.599  1.00  0.46           O  
ATOM     17  N   LYS A   6      -1.288  -5.974   3.418  1.00  0.36           N  
ATOM     18  CA  LYS A   6      -2.305  -6.766   4.039  1.00  0.39           C  
ATOM     19  C   LYS A   6      -3.702  -6.340   3.743  1.00  0.46           C  
ATOM     20  O   LYS A   6      -3.971  -5.146   3.860  1.00  0.53           O  
ATOM     21  N   THR A   7      -4.651  -7.242   3.438  1.00  0.58           N  
ATOM     22  CA  THR A   7      -5.951  -6.792   3.048  1.00  0.78           C  
ATOM     23  C   THR A   7      -6.784  -6.493   4.248  1.00  0.94           C  
ATOM     24  O   THR A   7      -6.411  -6.434   5.419  1.00  0.99           O  
ATOM     25  N   LEU A   8      -8.067  -6.242   3.938  1.00  1.17           N  
ATOM     26  CA  LEU A   8      -9.079  -5.986   4.915  1.00  1.39           C  
ATOM     27  C   LEU A   8      -9.327  -7.140   5.824  1.00  1.44           C  
ATOM     28  O   LEU A   8      -9.374  -7.081   7.052  1.00  1.60           O  
ATOM     29  N   THR A   9      -9.512  -8.305   5.177  1.00  1.41           N  
ATOM     30  CA  THR A   9      -9.737  -9.522   5.894  1.00  1.51           C  
ATOM     31  C   THR A   9      -8.482 -10.238   6.259  1.00  1.37           C  
ATOM     32  O   THR A   9      -8.273 -10.652   7.398  1.00  1.62           O  
ATOM     33  N   GLY A  10      -7.480 -10.363   5.371  1.00  1.18           N  
ATOM     34  CA  GLY A  10      -6.292 -11.022   5.816  1.00  1.22           C  
ATOM     35  C   GLY A  10      -5.248 -11.464   4.850  1.00  0.99           C  
ATOM     36  O   GLY A  10      -4.226 -11.973   5.306  1.00  1.31           O  
ATOM     37  N   LYS A  11      -5.438 -11.322   3.526  1.00  0.73           N  
ATOM     38  CA  LYS A  11      -4.549 -11.851   2.539  1.00  0.60           C  
ATOM     39  C   LYS A  11      -3.245 -11.136   2.452  1.00  0.51           C  
ATOM     40  O   LYS A  11      -3.175  -9.910   2.523  1.00  0.63           O  
ATOM     41  N   THR A  12      -2.144 -11.906   2.401  1.00  0.49           N  
ATOM     42  CA  THR A  12      -0.879 -11.258   2.237  1.00  0.48           C  
ATOM     43  C   THR A  12      -0.569 -11.152   0.784  1.00  0.52           C  
ATOM     44  O   THR A  12      -0.254 -12.160   0.152  1.00  0.72           O  
ATOM     45  N   ILE A  13      -0.586  -9.931   0.219  1.00  0.48           N  
ATOM     46  CA  ILE A  13      -0.224  -9.643  -1.134  1.00  0.55           C  
ATOM     47  C   ILE A  13       1.218  -9.266  -1.137  1.00  0.51           C  
ATOM     48  O   ILE A  13       1.640  -8.436  -0.334  1.00  0.56           O  
ATOM     49  N   THR A  14       1.992  -9.800  -2.098  1.00  0.55           N  
ATOM     50  CA  THR A  14       3.387  -9.541  -2.273  1.00  0.54           C  
ATOM     51  C   THR A  14       3.624  -8.587  -3.393  1.00  0.55           C  
ATOM     52  O   THR A  14       3.134  -8.763  -4.506  1.00  0.72           O  
ATOM     53  N   LEU A  15       4.381  -7.506  -3.130  1.00  0.50           N  
ATOM     54  CA  LEU A  15       4.644  -6.491  -4.101  1.00  0.55           C  
ATOM     55  C   LEU A  15       6.124  -6.357  -4.212  1.00  0.52           C  
ATOM     56  O   LEU A  15       6.876  -6.712  -3.305  1.00  0.58           O  
ATOM     57  N   GLU A  16       6.613  -5.849  -5.357  1.00  0.59           N  
ATOM     58  CA  GLU A  16       7.948  -5.398  -5.601  1.00  0.63           C  
ATOM     59  C   GLU A  16       8.098  -3.916  -5.634  1.00  0.65           C  
ATOM     60  O   GLU A  16       7.473  -3.305  -6.499  1.00  0.81           O  
ATOM     61  N   VAL A  17       8.932  -3.215  -4.846  1.00  0.61           N  
ATOM     62  CA  VAL A  17       8.943  -1.792  -4.982  1.00  0.63           C  
ATOM     63  C   VAL A  17      10.386  -1.447  -4.840  1.00  0.65           C  
ATOM     64  O   VAL A  17      11.217  -2.218  -4.362  1.00  0.76           O  
ATOM     65  N   GLU A  18      10.760  -0.239  -5.299  1.00  0.68           N  
ATOM     66  CA  GLU A  18      12.008   0.407  -5.036  1.00  0.74           C  
ATOM     67  C   GLU A  18      11.632   1.567  -4.178  1.00  0.71           C  
ATOM     68  O   GLU A  18      10.469   1.946  -4.298  1.00  0.74           O  
ATOM     69  N   PRO A  19      12.452   2.172  -3.371  1.00  0.74           N  
ATOM     70  CA  PRO A  19      12.053   3.170  -2.422  1.00  0.74           C  
ATOM     71  C   PRO A  19      11.786   4.480  -3.080  1.00  0.70           C  
ATOM     72  O   PRO A  19      11.276   5.423  -2.479  1.00  0.74           O  
ATOM     73  N   SER A  20      12.150   4.576  -4.372  1.00  0.70           N  
ATOM     74  CA  SER A  20      11.833   5.661  -5.248  1.00  0.74           C  
ATOM     75  C   SER A  20      10.479   5.524  -5.856  1.00  0.71           C  
ATOM     76  O   SER A  20      10.059   6.537  -6.415  1.00  0.80           O  
ATOM     77  N   ASP A  21       9.718   4.419  -5.772  1.00  0.70           N  
ATOM     78  CA  ASP A  21       8.375   4.284  -6.244  1.00  0.73           C  
ATOM     79  C   ASP A  21       7.434   5.126  -5.454  1.00  0.64           C  
ATOM     80  O   ASP A  21       7.609   5.355  -4.259  1.00  0.66           O  
ATOM     81  N   THR A  22       6.347   5.738  -5.958  1.00  0.63           N  
ATOM     82  CA  THR A  22       5.408   6.535  -5.231  1.00  0.58           C  
ATOM     83  C   THR A  22       4.323   5.688  -4.661  1.00  0.53           C  
ATOM     84  O   THR A  22       4.220   4.546  -5.107  1.00  0.58           O  
ATOM     85  N   ILE A  23       3.598   6.136  -3.620  1.00  0.51           N  
ATOM     86  CA  ILE A  23       2.473   5.393  -3.142  1.00  0.48           C  
ATOM     87  C   ILE A  23       1.329   5.114  -4.054  1.00  0.48           C  
ATOM     88  O   ILE A  23       0.736   4.043  -3.928  1.00  0.51           O  
ATOM     89  N   GLU A  24       1.020   6.018  -5.000  1.00  0.50           N  
ATOM     90  CA  GLU A  24       0.263   5.761  -6.185  1.00  0.53           C  
ATOM     91  C   GLU A  24       0.703   4.600  -7.010  1.00  0.50           C  
ATOM     92  O   GLU A  24      -0.178   3.825  -7.378  1.00  0.55           O  
ATOM     93  N   ASN A  25       2.002   4.440  -7.321  1.00  0.51           N  
ATOM     94  CA  ASN A  25       2.560   3.314  -8.001  1.00  0.52           C  
ATOM     95  C   ASN A  25       2.351   2.044  -7.250  1.00  0.47           C  
ATOM     96  O   ASN A  25       2.074   1.040  -7.904  1.00  0.53           O  
ATOM     97  N   VAL A  26       2.444   2.037  -5.908  1.00  0.45           N  
ATOM     98  CA  VAL A  26       2.217   0.893  -5.080  1.00  0.44           C  
ATOM     99  C   VAL A  26       0.785   0.496  -5.184  1.00  0.40           C  
ATOM    100  O   VAL A  26       0.535  -0.691  -5.387  1.00  0.44           O  
ATOM    101  N   LYS A  27      -0.146   1.466  -5.146  1.00  0.40           N  
ATOM    102  CA  LYS A  27      -1.505   1.162  -5.469  1.00  0.41           C  
ATOM    103  C   LYS A  27      -1.815   0.670  -6.840  1.00  0.38           C  
ATOM    104  O   LYS A  27      -2.621  -0.255  -6.938  1.00  0.42           O  
ATOM    105  N   ALA A  28      -1.075   1.130  -7.865  1.00  0.39           N  
ATOM    106  CA  ALA A  28      -1.151   0.664  -9.215  1.00  0.39           C  
ATOM    107  C   ALA A  28      -0.714  -0.747  -9.410  1.00  0.36           C  
ATOM    108  O   ALA A  28      -1.329  -1.460 -10.201  1.00  0.42           O  
ATOM    109  N   LYS A  29       0.269  -1.299  -8.678  1.00  0.39           N  
ATOM    110  CA  LYS A  29       0.697  -2.662  -8.618  1.00  0.43           C  
ATOM    111  C   LYS A  29      -0.268  -3.507  -7.859  1.00  0.44           C  
ATOM    112  O   LYS A  29      -0.364  -4.720  -8.035  1.00  0.54           O  
ATOM    113  N   ILE A  30      -1.166  -2.938  -7.035  1.00  0.41           N  
ATOM    114  CA  ILE A  30      -2.188  -3.643  -6.324  1.00  0.44           C  
ATOM    115  C   ILE A  30      -3.307  -3.822  -7.291  1.00  0.45           C  
ATOM    116  O   ILE A  30      -4.027  -4.819  -7.316  1.00  0.56           O  
ATOM    117  N   GLN A  31      -3.517  -2.882  -8.229  1.00  0.41           N  
ATOM    118  CA  GLN A  31      -4.498  -2.984  -9.265  1.00  0.48           C  
ATOM    119  C   GLN A  31      -4.193  -4.050 -10.261  1.00  0.52           C  
ATOM    120  O   GLN A  31      -5.094  -4.689 -10.803  1.00  0.66           O  
ATOM    121  N   ASP A  32      -2.908  -4.302 -10.565  1.00  0.50           N  
ATOM    122  CA  ASP A  32      -2.499  -5.466 -11.288  1.00  0.60           C  
ATOM    123  C   ASP A  32      -2.928  -6.734 -10.634  1.00  0.65           C  
ATOM    124  O   ASP A  32      -3.436  -7.637 -11.297  1.00  0.81           O  
ATOM    125  N   LYS A  33      -2.757  -6.863  -9.306  1.00  0.62           N  
ATOM    126  CA  LYS A  33      -3.055  -8.049  -8.565  1.00  0.73           C  
ATOM    127  C   LYS A  33      -4.518  -8.251  -8.366  1.00  0.69           C  
ATOM    128  O   LYS A  33      -5.110  -9.128  -8.994  1.00  0.83           O  
ATOM    129  N   GLU A  34      -5.133  -7.364  -7.565  1.00  0.63           N  
ATOM    130  CA  GLU A  34      -6.446  -7.429  -7.001  1.00  0.67           C  
ATOM    131  C   GLU A  34      -7.476  -6.918  -7.948  1.00  0.69           C  
ATOM    132  O   GLU A  34      -8.544  -7.512  -8.090  1.00  0.95           O  
ATOM    133  N   GLY A  35      -7.196  -5.762  -8.578  1.00  0.63           N  
ATOM    134  CA  GLY A  35      -8.065  -5.233  -9.581  1.00  0.68           C  
ATOM    135  C   GLY A  35      -8.639  -3.917  -9.184  1.00  0.76           C  
ATOM    136  O   GLY A  35      -9.417  -3.279  -9.893  1.00  1.12           O  
ATOM    137  N   ILE A  36      -8.356  -3.563  -7.918  1.00  0.70           N  
ATOM    138  CA  ILE A  36      -8.885  -2.445  -7.199  1.00  0.76           C  
ATOM    139  C   ILE A  36      -8.311  -1.171  -7.715  1.00  0.71           C  
ATOM    140  O   ILE A  36      -7.089  -1.032  -7.709  1.00  0.73           O  
ATOM    141  N   PRO A  37      -8.985  -0.162  -8.183  1.00  0.75           N  
ATOM    142  CA  PRO A  37      -8.409   1.038  -8.716  1.00  0.79           C  
ATOM    143  C   PRO A  37      -7.728   1.847  -7.665  1.00  0.75           C  
ATOM    144  O   PRO A  37      -8.278   1.794  -6.567  1.00  0.75           O  
ATOM    145  N   PRO A  38      -6.653   2.554  -7.850  1.00  0.81           N  
ATOM    146  CA  PRO A  38      -5.927   3.252  -6.828  1.00  0.85           C  
ATOM    147  C   PRO A  38      -6.755   4.324  -6.208  1.00  0.89           C  
ATOM    148  O   PRO A  38      -6.460   4.641  -5.056  1.00  0.99           O  
ATOM    149  N   ASP A  39      -7.746   4.948  -6.869  1.00  0.96           N  
ATOM    150  CA  ASP A  39      -8.607   5.938  -6.301  1.00  1.11           C  
ATOM    151  C   ASP A  39      -9.246   5.455  -5.045  1.00  1.00           C  
ATOM    152  O   ASP A  39      -9.086   6.148  -4.042  1.00  1.14           O  
ATOM    153  N   GLN A  40      -9.875   4.266  -5.025  1.00  0.87           N  
ATOM    154  CA  GLN A  40     -10.546   3.654  -3.921  1.00  0.84           C  
ATOM    155  C   GLN A  40      -9.637   3.212  -2.825  1.00  0.67           C  
ATOM    156  O   GLN A  40     -10.028   3.263  -1.660  1.00  0.80           O  
ATOM    157  N   GLN A  41      -8.353   2.880  -3.047  1.00  0.56           N  
ATOM    158  CA  GLN A  41      -7.410   2.404  -2.083  1.00  0.51           C  
ATOM    159  C   GLN A  41      -6.914   3.402  -1.095  1.00  0.49           C  
ATOM    160  O   GLN A  41      -6.754   4.586  -1.393  1.00  0.65           O  
ATOM    161  N   ARG A  42      -6.508   2.898   0.085  1.00  0.47           N  
ATOM    162  CA  ARG A  42      -5.909   3.614   1.168  1.00  0.55           C  
ATOM    163  C   ARG A  42      -4.857   2.722   1.732  1.00  0.46           C  
ATOM    164  O   ARG A  42      -5.190   1.601   2.114  1.00  0.52           O  
ATOM    165  N   LEU A  43      -3.569   3.105   1.772  1.00  0.46           N  
ATOM    166  CA  LEU A  43      -2.525   2.354   2.400  1.00  0.42           C  
ATOM    167  C   LEU A  43      -2.106   2.972   3.689  1.00  0.43           C  
ATOM    168  O   LEU A  43      -1.941   4.191   3.709  1.00  0.55           O  
ATOM    169  N   ILE A  44      -1.910   2.095   4.690  1.00  0.42           N  
ATOM    170  CA  ILE A  44      -1.587   2.516   6.018  1.00  0.46           C  
ATOM    171  C   ILE A  44      -0.312   1.895   6.474  1.00  0.42           C  
ATOM    172  O   ILE A  44      -0.017   0.706   6.374  1.00  0.53           O  
ATOM    173  N   PHE A  45       0.580   2.666   7.123  1.00  0.42           N  
ATOM    174  CA  PHE A  45       1.801   2.222   7.719  1.00  0.46           C  
ATOM    175  C   PHE A  45       2.276   3.128   8.803  1.00  0.68           C  
ATOM    176  O   PHE A  45       2.254   4.322   8.507  1.00  1.50           O  
ATOM    177  N   ALA A  46       2.649   2.640   9.999  1.00  0.81           N  
ATOM    178  CA  ALA A  46       3.139   3.347  11.141  1.00  0.96           C  
ATOM    179  C   ALA A  46       2.171   4.239  11.838  1.00  0.97           C  
ATOM    180  O   ALA A  46       2.518   5.328  12.293  1.00  1.21           O  
ATOM    181  N   GLY A  47       0.897   3.811  11.881  1.00  0.99           N  
ATOM    182  CA  GLY A  47      -0.084   4.674  12.464  1.00  1.10           C  
ATOM    183  C   GLY A  47      -0.600   5.677  11.492  1.00  1.03           C  
ATOM    184  O   GLY A  47      -1.735   6.150  11.509  1.00  1.30           O  
ATOM    185  N   LYS A  48       0.208   6.080  10.495  1.00  0.98           N  
ATOM    186  CA  LYS A  48      -0.178   7.033   9.501  1.00  1.05           C  
ATOM    187  C   LYS A  48      -0.801   6.380   8.316  1.00  0.84           C  
ATOM    188  O   LYS A  48      -0.760   5.167   8.116  1.00  0.81           O  
ATOM    189  N   GLN A  49      -1.467   7.193   7.475  1.00  0.84           N  
ATOM    190  CA  GLN A  49      -2.008   6.820   6.206  1.00  0.80           C  
ATOM    191  C   GLN A  49      -1.115   7.507   5.231  1.00  0.72           C  
ATOM    192  O   GLN A  49      -0.797   8.693   5.301  1.00  0.83           O  
ATOM    193  N   LEU A  50      -0.735   6.811   4.144  1.00  0.69           N  
ATOM    194  CA  LEU A  50       0.223   7.329   3.217  1.00  0.66           C  
ATOM    195  C   LEU A  50      -0.368   8.325   2.279  1.00  0.72           C  
ATOM    196  O   LEU A  50      -1.537   8.204   1.917  1.00  0.90           O  
ATOM    197  N   GLU A  51       0.416   9.275   1.738  1.00  0.70           N  
ATOM    198  CA  GLU A  51      -0.043  10.142   0.697  1.00  0.76           C  
ATOM    199  C   GLU A  51       0.426   9.642  -0.625  1.00  0.77           C  
ATOM    200  O   GLU A  51       1.540   9.151  -0.798  1.00  1.23           O  
ATOM    201  N   ASP A  52      -0.448   9.769  -1.640  1.00  0.66           N  
ATOM    202  CA  ASP A  52      -0.355   9.138  -2.920  1.00  0.65           C  
ATOM    203  C   ASP A  52       0.804   9.501  -3.783  1.00  0.60           C  
ATOM    204  O   ASP A  52       1.730   8.749  -4.081  1.00  0.62           O  
ATOM    205  N   GLY A  53       1.006  10.787  -4.121  1.00  0.68           N  
ATOM    206  CA  GLY A  53       2.215  11.304  -4.682  1.00  0.73           C  
ATOM    207  C   GLY A  53       3.331  11.679  -3.769  1.00  0.72           C  
ATOM    208  O   GLY A  53       4.060  12.643  -3.999  1.00  0.97           O  
ATOM    209  N   ARG A  54       3.516  10.837  -2.737  1.00  0.64           N  
ATOM    210  CA  ARG A  54       4.663  10.792  -1.884  1.00  0.63           C  
ATOM    211  C   ARG A  54       5.354   9.493  -2.120  1.00  0.59           C  
ATOM    212  O   ARG A  54       4.761   8.581  -2.694  1.00  0.62           O  
ATOM    213  N   THR A  55       6.640   9.344  -1.755  1.00  0.63           N  
ATOM    214  CA  THR A  55       7.402   8.146  -1.927  1.00  0.61           C  
ATOM    215  C   THR A  55       7.643   7.402  -0.658  1.00  0.59           C  
ATOM    216  O   THR A  55       7.492   7.897   0.458  1.00  0.64           O  
ATOM    217  N   LEU A  56       8.000   6.118  -0.836  1.00  0.58           N  
ATOM    218  CA  LEU A  56       8.410   5.188   0.170  1.00  0.59           C  
ATOM    219  C   LEU A  56       9.659   5.581   0.882  1.00  0.64           C  
ATOM    220  O   LEU A  56       9.834   5.334   2.075  1.00  0.70           O  
ATOM    221  N   SER A  57      10.661   6.169   0.206  1.00  0.68           N  
ATOM    222  CA  SER A  57      11.868   6.657   0.800  1.00  0.75           C  
ATOM    223  C   SER A  57      11.652   7.775   1.760  1.00  0.76           C  
ATOM    224  O   SER A  57      12.184   7.588   2.854  1.00  0.84           O  
ATOM    225  N   ASP A  58      10.728   8.697   1.438  1.00  0.75           N  
ATOM    226  CA  ASP A  58      10.294   9.750   2.303  1.00  0.78           C  
ATOM    227  C   ASP A  58       9.951   9.199   3.643  1.00  0.77           C  
ATOM    228  O   ASP A  58      10.678   9.453   4.603  1.00  0.86           O  
ATOM    229  N   TYR A  59       8.832   8.456   3.715  1.00  0.72           N  
ATOM    230  CA  TYR A  59       8.193   7.861   4.849  1.00  0.73           C  
ATOM    231  C   TYR A  59       8.993   7.026   5.789  1.00  0.76           C  
ATOM    232  O   TYR A  59       8.691   6.879   6.972  1.00  0.89           O  
ATOM    233  N   ASN A  60      10.058   6.441   5.214  1.00  0.74           N  
ATOM    234  CA  ASN A  60      11.041   5.568   5.779  1.00  0.79           C  
ATOM    235  C   ASN A  60      10.599   4.154   5.926  1.00  0.75           C  
ATOM    236  O   ASN A  60      10.822   3.540   6.968  1.00  0.86           O  
ATOM    237  N   ILE A  61      10.003   3.654   4.828  1.00  0.67           N  
ATOM    238  CA  ILE A  61       9.516   2.310   4.776  1.00  0.65           C  
ATOM    239  C   ILE A  61      10.518   1.475   4.056  1.00  0.66           C  
ATOM    240  O   ILE A  61      10.897   1.674   2.903  1.00  0.75           O  
ATOM    241  N   GLN A  62      10.976   0.359   4.648  1.00  0.67           N  
ATOM    242  CA  GLN A  62      12.014  -0.542   4.251  1.00  0.70           C  
ATOM    243  C   GLN A  62      11.463  -1.786   3.645  1.00  0.62           C  
ATOM    244  O   GLN A  62      10.253  -1.951   3.493  1.00  0.64           O  
ATOM    245  N   LYS A  63      12.309  -2.786   3.342  1.00  0.64           N  
ATOM    246  CA  LYS A  63      11.949  -4.118   2.964  1.00  0.62           C  
ATOM    247  C   LYS A  63      11.327  -4.973   4.014  1.00  0.59           C  
ATOM    248  O   LYS A  63      11.581  -4.910   5.217  1.00  0.66           O  
ATOM    249  N   GLU A  64      10.476  -5.858   3.468  1.00  0.57           N  
ATOM    250  CA  GLU A  64       9.689  -6.871   4.100  1.00  0.58           C  
ATOM    251  C   GLU A  64       8.728  -6.330   5.102  1.00  0.56           C  
ATOM    252  O   GLU A  64       8.252  -7.023   5.999  1.00  0.70           O  
ATOM    253  N   SER A  65       8.350  -5.062   4.859  1.00  0.51           N  
ATOM    254  CA  SER A  65       7.528  -4.204   5.654  1.00  0.51           C  
ATOM    255  C   SER A  65       6.122  -4.451   5.225  1.00  0.43           C  
ATOM    256  O   SER A  65       5.895  -4.600   4.026  1.00  0.50           O  
ATOM    257  N   THR A  66       5.145  -4.665   6.125  1.00  0.45           N  
ATOM    258  CA  THR A  66       3.790  -5.021   5.843  1.00  0.45           C  
ATOM    259  C   THR A  66       3.016  -3.753   5.951  1.00  0.43           C  
ATOM    260  O   THR A  66       2.829  -3.186   7.027  1.00  0.58           O  
ATOM    261  N   LEU A  67       2.495  -3.252   4.817  1.00  0.38           N  
ATOM    262  CA  LEU A  67       1.546  -2.186   4.737  1.00  0.38           C  
ATOM    263  C   LEU A  67       0.206  -2.801   4.958  1.00  0.37           C  
ATOM    264  O   LEU A  67       0.022  -4.010   4.831  1.00  0.50           O  
ATOM    265  N   HIS A  68      -0.770  -1.957   5.338  1.00  0.35           N  
ATOM    266  CA  HIS A  68      -2.139  -2.326   5.532  1.00  0.37           C  
ATOM    267  C   HIS A  68      -2.988  -1.714   4.472  1.00  0.35           C  
ATOM    268  O   HIS A  68      -2.786  -0.533   4.194  1.00  0.48           O  
ATOM    269  N   LEU A  69      -3.903  -2.429   3.792  1.00  0.36           N  
ATOM    270  CA  LEU A  69      -4.788  -1.937   2.783  1.00  0.38           C  
ATOM    271  C   LEU A  69      -6.063  -1.720   3.524  1.00  0.41           C  
ATOM    272  O   LEU A  69      -6.590  -2.589   4.217  1.00  0.56           O  
ATOM    273  N   VAL A  70      -6.626  -0.523   3.277  1.00  0.45           N  
ATOM    274  CA  VAL A  70      -7.884   0.005   3.703  1.00  0.56           C  
ATOM    275  C   VAL A  70      -8.542   0.426   2.434  1.00  0.55           C  
ATOM    276  O   VAL A  70      -7.808   0.667   1.477  1.00  0.58           O  
TER
ENDMDL
MODEL      9
ATOM      1  N   GLN A   2      11.473  -6.153  -1.662  1.00  0.59           N  
ATOM      2  CA  GLN A   2      10.186  -6.765  -1.554  1.00  0.56           C  
ATOM      3  C   GLN A   2       9.443  -6.162  -0.412  1.00  0.50           C  
ATOM      4  O   GLN A   2      10.045  -5.967   0.643  1.00  0.60           O  
ATOM      5  N   ILE A   3       8.154  -5.796  -0.526  1.00  0.44           N  
ATOM      6  CA  ILE A   3       7.337  -5.315   0.545  1.00  0.42           C  
ATOM      7  C   ILE A   3       6.046  -6.059   0.510  1.00  0.40           C  
ATOM      8  O   ILE A   3       5.719  -6.710  -0.481  1.00  0.50           O  
ATOM      9  N   PHE A   4       5.193  -5.936   1.542  1.00  0.37           N  
ATOM     10  CA  PHE A   4       3.940  -6.625   1.577  1.00  0.38           C  
ATOM     11  C   PHE A   4       2.866  -5.599   1.699  1.00  0.39           C  
ATOM     12  O   PHE A   4       3.092  -4.521   2.244  1.00  0.60           O  
ATOM     13  N   VAL A   5       1.663  -6.026   1.274  1.00  0.35           N  
ATOM     14  CA  VAL A   5       0.438  -5.366   1.600  1.00  0.35           C  
ATOM     15  C   VAL A   5      -0.479  -6.331   2.271  1.00  0.35           C  
ATOM     16  O   VAL A   5      -0.669  -7.478   1.867  1.00  0.46           O  
ATOM     17  N   LYS A   6      -1.099  -5.940   3.398  1.00  0.36           N  
ATOM     18  CA  LYS A   6      -2.014  -6.768   4.121  1.00  0.39           C  
ATOM     19  C   LYS A   6      -3.397  -6.362   3.740  1.00  0.46           C  
ATOM     20  O   LYS A   6      -3.701  -5.173   3.662  1.00  0.53           O  
ATOM     21  N   THR A   7      -4.294  -7.325   3.460  1.00  0.58           N  
ATOM     22  CA  THR A   7      -5.652  -6.990   3.159  1.00  0.78           C  
ATOM     23  C   THR A   7      -6.540  -6.840   4.345  1.00  0.94           C  
ATOM     24  O   THR A   7      -6.131  -6.787   5.503  1.00  0.99           O  
ATOM     25  N   LEU A   8      -7.855  -6.814   4.063  1.00  1.17           N  
ATOM     26  CA  LEU A   8      -8.804  -6.776   5.133  1.00  1.39           C  
ATOM     27  C   LEU A   8      -8.927  -8.092   5.823  1.00  1.44           C  
ATOM     28  O   LEU A   8      -8.833  -8.180   7.046  1.00  1.60           O  
ATOM     29  N   THR A   9      -9.067  -9.190   5.059  1.00  1.41           N  
ATOM     30  CA  THR A   9      -9.302 -10.482   5.623  1.00  1.51           C  
ATOM     31  C   THR A   9      -8.097 -11.143   6.199  1.00  1.37           C  
ATOM     32  O   THR A   9      -8.236 -11.849   7.197  1.00  1.62           O  
ATOM     33  N   GLY A  10      -6.891 -10.872   5.670  1.00  1.18           N  
ATOM     34  CA  GLY A  10      -5.637 -11.312   6.199  1.00  1.22           C  
ATOM     35  C   GLY A  10      -4.633 -11.739   5.185  1.00  0.99           C  
ATOM     36  O   GLY A  10      -3.539 -12.199   5.504  1.00  1.31           O  
ATOM     37  N   LYS A  11      -4.890 -11.459   3.895  1.00  0.73           N  
ATOM     38  CA  LYS A  11      -4.044 -11.981   2.867  1.00  0.60           C  
ATOM     39  C   LYS A  11      -2.847 -11.098   2.776  1.00  0.51           C  
ATOM     40  O   LYS A  11      -2.946  -9.893   2.549  1.00  0.63           O  
ATOM     41  N   THR A  12      -1.695 -11.759   2.567  1.00  0.49           N  
ATOM     42  CA  THR A  12      -0.460 -11.058   2.403  1.00  0.48           C  
ATOM     43  C   THR A  12      -0.146 -10.921   0.953  1.00  0.52           C  
ATOM     44  O   THR A  12       0.275 -11.916   0.366  1.00  0.72           O  
ATOM     45  N   ILE A  13      -0.252  -9.722   0.353  1.00  0.48           N  
ATOM     46  CA  ILE A  13       0.132  -9.456  -0.999  1.00  0.55           C  
ATOM     47  C   ILE A  13       1.600  -9.209  -1.035  1.00  0.51           C  
ATOM     48  O   ILE A  13       2.103  -8.324  -0.344  1.00  0.56           O  
ATOM     49  N   THR A  14       2.363  -9.989  -1.823  1.00  0.55           N  
ATOM     50  CA  THR A  14       3.769  -9.764  -1.960  1.00  0.54           C  
ATOM     51  C   THR A  14       4.132  -8.932  -3.141  1.00  0.55           C  
ATOM     52  O   THR A  14       3.900  -9.349  -4.275  1.00  0.72           O  
ATOM     53  N   LEU A  15       4.672  -7.722  -2.904  1.00  0.50           N  
ATOM     54  CA  LEU A  15       5.066  -6.819  -3.940  1.00  0.55           C  
ATOM     55  C   LEU A  15       6.523  -6.512  -3.999  1.00  0.52           C  
ATOM     56  O   LEU A  15       7.252  -6.729  -3.032  1.00  0.58           O  
ATOM     57  N   GLU A  16       6.968  -6.018  -5.169  1.00  0.59           N  
ATOM     58  CA  GLU A  16       8.350  -5.657  -5.238  1.00  0.63           C  
ATOM     59  C   GLU A  16       8.551  -4.276  -5.758  1.00  0.65           C  
ATOM     60  O   GLU A  16       8.011  -3.878  -6.790  1.00  0.81           O  
ATOM     61  N   VAL A  17       9.274  -3.489  -4.941  1.00  0.61           N  
ATOM     62  CA  VAL A  17       9.528  -2.108  -5.208  1.00  0.63           C  
ATOM     63  C   VAL A  17      10.984  -1.815  -5.094  1.00  0.65           C  
ATOM     64  O   VAL A  17      11.805  -2.729  -5.056  1.00  0.76           O  
ATOM     65  N   GLU A  18      11.457  -0.556  -5.052  1.00  0.68           N  
ATOM     66  CA  GLU A  18      12.748  -0.125  -4.610  1.00  0.74           C  
ATOM     67  C   GLU A  18      12.448   1.081  -3.788  1.00  0.71           C  
ATOM     68  O   GLU A  18      11.260   1.382  -3.685  1.00  0.74           O  
ATOM     69  N   PRO A  19      13.347   1.719  -3.099  1.00  0.74           N  
ATOM     70  CA  PRO A  19      12.995   2.750  -2.165  1.00  0.74           C  
ATOM     71  C   PRO A  19      12.710   4.108  -2.706  1.00  0.70           C  
ATOM     72  O   PRO A  19      12.186   4.918  -1.943  1.00  0.74           O  
ATOM     73  N   SER A  20      12.979   4.288  -4.012  1.00  0.70           N  
ATOM     74  CA  SER A  20      12.636   5.508  -4.674  1.00  0.74           C  
ATOM     75  C   SER A  20      11.257   5.540  -5.239  1.00  0.71           C  
ATOM     76  O   SER A  20      10.702   6.606  -5.503  1.00  0.80           O  
ATOM     77  N   ASP A  21      10.581   4.402  -5.474  1.00  0.70           N  
ATOM     78  CA  ASP A  21       9.230   4.238  -5.913  1.00  0.73           C  
ATOM     79  C   ASP A  21       8.229   4.791  -4.959  1.00  0.64           C  
ATOM     80  O   ASP A  21       8.430   4.899  -3.750  1.00  0.66           O  
ATOM     81  N   THR A  22       7.052   5.209  -5.457  1.00  0.63           N  
ATOM     82  CA  THR A  22       5.981   5.804  -4.718  1.00  0.58           C  
ATOM     83  C   THR A  22       4.948   4.893  -4.149  1.00  0.53           C  
ATOM     84  O   THR A  22       4.762   3.774  -4.627  1.00  0.58           O  
ATOM     85  N   ILE A  23       4.071   5.410  -3.271  1.00  0.51           N  
ATOM     86  CA  ILE A  23       2.921   4.730  -2.763  1.00  0.48           C  
ATOM     87  C   ILE A  23       1.957   4.466  -3.867  1.00  0.48           C  
ATOM     88  O   ILE A  23       1.366   3.387  -3.914  1.00  0.51           O  
ATOM     89  N   GLU A  24       1.811   5.378  -4.845  1.00  0.50           N  
ATOM     90  CA  GLU A  24       1.131   5.241  -6.096  1.00  0.53           C  
ATOM     91  C   GLU A  24       1.647   4.122  -6.933  1.00  0.50           C  
ATOM     92  O   GLU A  24       0.892   3.489  -7.669  1.00  0.55           O  
ATOM     93  N   ASN A  25       2.918   3.680  -6.930  1.00  0.51           N  
ATOM     94  CA  ASN A  25       3.343   2.552  -7.699  1.00  0.52           C  
ATOM     95  C   ASN A  25       2.857   1.276  -7.100  1.00  0.47           C  
ATOM     96  O   ASN A  25       2.414   0.400  -7.843  1.00  0.53           O  
ATOM     97  N   VAL A  26       2.731   1.181  -5.765  1.00  0.45           N  
ATOM     98  CA  VAL A  26       2.177   0.088  -5.028  1.00  0.44           C  
ATOM     99  C   VAL A  26       0.737  -0.118  -5.348  1.00  0.40           C  
ATOM    100  O   VAL A  26       0.356  -1.259  -5.605  1.00  0.44           O  
ATOM    101  N   LYS A  27      -0.002   1.004  -5.283  1.00  0.40           N  
ATOM    102  CA  LYS A  27      -1.390   1.062  -5.620  1.00  0.41           C  
ATOM    103  C   LYS A  27      -1.695   0.640  -7.017  1.00  0.38           C  
ATOM    104  O   LYS A  27      -2.548  -0.215  -7.249  1.00  0.42           O  
ATOM    105  N   ALA A  28      -0.837   1.028  -7.976  1.00  0.39           N  
ATOM    106  CA  ALA A  28      -0.999   0.545  -9.313  1.00  0.39           C  
ATOM    107  C   ALA A  28      -0.853  -0.916  -9.564  1.00  0.36           C  
ATOM    108  O   ALA A  28      -1.555  -1.470 -10.408  1.00  0.42           O  
ATOM    109  N   LYS A  29       0.047  -1.536  -8.779  1.00  0.39           N  
ATOM    110  CA  LYS A  29       0.149  -2.963  -8.756  1.00  0.43           C  
ATOM    111  C   LYS A  29      -0.976  -3.578  -7.996  1.00  0.44           C  
ATOM    112  O   LYS A  29      -1.434  -4.651  -8.384  1.00  0.54           O  
ATOM    113  N   ILE A  30      -1.556  -3.059  -6.899  1.00  0.41           N  
ATOM    114  CA  ILE A  30      -2.799  -3.499  -6.345  1.00  0.44           C  
ATOM    115  C   ILE A  30      -3.916  -3.432  -7.329  1.00  0.45           C  
ATOM    116  O   ILE A  30      -4.778  -4.301  -7.456  1.00  0.56           O  
ATOM    117  N   GLN A  31      -3.987  -2.385  -8.171  1.00  0.41           N  
ATOM    118  CA  GLN A  31      -4.909  -2.274  -9.258  1.00  0.48           C  
ATOM    119  C   GLN A  31      -4.719  -3.305 -10.316  1.00  0.52           C  
ATOM    120  O   GLN A  31      -5.706  -3.812 -10.848  1.00  0.66           O  
ATOM    121  N   ASP A  32      -3.457  -3.605 -10.672  1.00  0.50           N  
ATOM    122  CA  ASP A  32      -3.091  -4.693 -11.526  1.00  0.60           C  
ATOM    123  C   ASP A  32      -3.568  -6.040 -11.102  1.00  0.65           C  
ATOM    124  O   ASP A  32      -4.420  -6.674 -11.721  1.00  0.81           O  
ATOM    125  N   LYS A  33      -3.055  -6.630 -10.007  1.00  0.62           N  
ATOM    126  CA  LYS A  33      -3.388  -7.932  -9.518  1.00  0.73           C  
ATOM    127  C   LYS A  33      -4.776  -8.040  -8.987  1.00  0.69           C  
ATOM    128  O   LYS A  33      -5.644  -8.779  -9.451  1.00  0.83           O  
ATOM    129  N   GLU A  34      -5.106  -7.240  -7.959  1.00  0.63           N  
ATOM    130  CA  GLU A  34      -6.270  -7.530  -7.182  1.00  0.67           C  
ATOM    131  C   GLU A  34      -7.498  -6.987  -7.828  1.00  0.69           C  
ATOM    132  O   GLU A  34      -8.411  -7.764  -8.107  1.00  0.95           O  
ATOM    133  N   GLY A  35      -7.411  -5.745  -8.337  1.00  0.63           N  
ATOM    134  CA  GLY A  35      -8.443  -5.216  -9.173  1.00  0.68           C  
ATOM    135  C   GLY A  35      -9.214  -4.139  -8.490  1.00  0.76           C  
ATOM    136  O   GLY A  35     -10.394  -3.879  -8.717  1.00  1.12           O  
ATOM    137  N   ILE A  36      -8.573  -3.386  -7.579  1.00  0.70           N  
ATOM    138  CA  ILE A  36      -9.231  -2.309  -6.905  1.00  0.76           C  
ATOM    139  C   ILE A  36      -8.675  -1.073  -7.525  1.00  0.71           C  
ATOM    140  O   ILE A  36      -7.446  -1.031  -7.536  1.00  0.73           O  
ATOM    141  N   PRO A  37      -9.293  -0.005  -7.934  1.00  0.75           N  
ATOM    142  CA  PRO A  37      -8.632   1.171  -8.422  1.00  0.79           C  
ATOM    143  C   PRO A  37      -7.968   1.971  -7.355  1.00  0.75           C  
ATOM    144  O   PRO A  37      -8.392   1.844  -6.207  1.00  0.75           O  
ATOM    145  N   PRO A  38      -7.006   2.815  -7.583  1.00  0.81           N  
ATOM    146  CA  PRO A  38      -6.337   3.498  -6.515  1.00  0.85           C  
ATOM    147  C   PRO A  38      -7.070   4.593  -5.819  1.00  0.89           C  
ATOM    148  O   PRO A  38      -6.646   4.855  -4.694  1.00  0.99           O  
ATOM    149  N   ASP A  39      -8.116   5.157  -6.448  1.00  0.96           N  
ATOM    150  CA  ASP A  39      -8.915   6.150  -5.800  1.00  1.11           C  
ATOM    151  C   ASP A  39      -9.769   5.551  -4.736  1.00  1.00           C  
ATOM    152  O   ASP A  39     -10.411   6.274  -3.976  1.00  1.14           O  
ATOM    153  N   GLN A  40      -9.874   4.211  -4.694  1.00  0.87           N  
ATOM    154  CA  GLN A  40     -10.640   3.567  -3.672  1.00  0.84           C  
ATOM    155  C   GLN A  40      -9.782   3.032  -2.577  1.00  0.67           C  
ATOM    156  O   GLN A  40     -10.354   2.755  -1.524  1.00  0.80           O  
ATOM    157  N   GLN A  41      -8.453   2.873  -2.708  1.00  0.56           N  
ATOM    158  CA  GLN A  41      -7.497   2.332  -1.793  1.00  0.51           C  
ATOM    159  C   GLN A  41      -6.960   3.385  -0.886  1.00  0.49           C  
ATOM    160  O   GLN A  41      -6.679   4.504  -1.310  1.00  0.65           O  
ATOM    161  N   ARG A  42      -6.772   3.082   0.411  1.00  0.47           N  
ATOM    162  CA  ARG A  42      -6.020   3.793   1.399  1.00  0.55           C  
ATOM    163  C   ARG A  42      -5.005   2.854   1.954  1.00  0.46           C  
ATOM    164  O   ARG A  42      -5.356   1.825   2.529  1.00  0.52           O  
ATOM    165  N   LEU A  43      -3.713   3.204   1.831  1.00  0.46           N  
ATOM    166  CA  LEU A  43      -2.659   2.401   2.371  1.00  0.42           C  
ATOM    167  C   LEU A  43      -2.165   3.033   3.627  1.00  0.43           C  
ATOM    168  O   LEU A  43      -2.053   4.245   3.808  1.00  0.55           O  
ATOM    169  N   ILE A  44      -2.079   2.175   4.660  1.00  0.42           N  
ATOM    170  CA  ILE A  44      -1.780   2.652   5.975  1.00  0.46           C  
ATOM    171  C   ILE A  44      -0.483   2.044   6.382  1.00  0.42           C  
ATOM    172  O   ILE A  44      -0.217   0.844   6.328  1.00  0.53           O  
ATOM    173  N   PHE A  45       0.431   2.771   7.051  1.00  0.42           N  
ATOM    174  CA  PHE A  45       1.578   2.186   7.671  1.00  0.46           C  
ATOM    175  C   PHE A  45       1.891   2.968   8.900  1.00  0.68           C  
ATOM    176  O   PHE A  45       1.682   4.180   8.930  1.00  1.50           O  
ATOM    177  N   ALA A  46       2.446   2.332   9.947  1.00  0.81           N  
ATOM    178  CA  ALA A  46       2.799   2.969  11.178  1.00  0.96           C  
ATOM    179  C   ALA A  46       1.725   3.761  11.841  1.00  0.97           C  
ATOM    180  O   ALA A  46       2.005   4.787  12.458  1.00  1.21           O  
ATOM    181  N   GLY A  47       0.450   3.371  11.667  1.00  0.99           N  
ATOM    182  CA  GLY A  47      -0.696   4.096  12.120  1.00  1.10           C  
ATOM    183  C   GLY A  47      -1.226   5.103  11.158  1.00  1.03           C  
ATOM    184  O   GLY A  47      -2.435   5.322  11.109  1.00  1.30           O  
ATOM    185  N   LYS A  48      -0.339   5.675  10.325  1.00  0.98           N  
ATOM    186  CA  LYS A  48      -0.547   6.736   9.388  1.00  1.05           C  
ATOM    187  C   LYS A  48      -1.127   6.312   8.083  1.00  0.84           C  
ATOM    188  O   LYS A  48      -0.720   5.252   7.610  1.00  0.81           O  
ATOM    189  N   GLN A  49      -2.018   7.085   7.437  1.00  0.84           N  
ATOM    190  CA  GLN A  49      -2.417   6.851   6.084  1.00  0.80           C  
ATOM    191  C   GLN A  49      -1.507   7.616   5.187  1.00  0.72           C  
ATOM    192  O   GLN A  49      -1.091   8.742   5.455  1.00  0.83           O  
ATOM    193  N   LEU A  50      -1.004   6.937   4.142  1.00  0.69           N  
ATOM    194  CA  LEU A  50       0.005   7.407   3.244  1.00  0.66           C  
ATOM    195  C   LEU A  50      -0.576   8.191   2.119  1.00  0.72           C  
ATOM    196  O   LEU A  50      -1.694   7.939   1.673  1.00  0.90           O  
ATOM    197  N   GLU A  51       0.150   9.209   1.622  1.00  0.70           N  
ATOM    198  CA  GLU A  51      -0.257   9.896   0.437  1.00  0.76           C  
ATOM    199  C   GLU A  51       0.368   9.291  -0.774  1.00  0.77           C  
ATOM    200  O   GLU A  51       1.344   8.544  -0.729  1.00  1.23           O  
ATOM    201  N   ASP A  52      -0.346   9.501  -1.894  1.00  0.66           N  
ATOM    202  CA  ASP A  52      -0.125   8.742  -3.085  1.00  0.65           C  
ATOM    203  C   ASP A  52       1.174   9.042  -3.752  1.00  0.60           C  
ATOM    204  O   ASP A  52       2.048   8.186  -3.872  1.00  0.62           O  
ATOM    205  N   GLY A  53       1.379  10.256  -4.292  1.00  0.68           N  
ATOM    206  CA  GLY A  53       2.646  10.817  -4.646  1.00  0.73           C  
ATOM    207  C   GLY A  53       3.542  11.068  -3.482  1.00  0.72           C  
ATOM    208  O   GLY A  53       3.974  12.203  -3.289  1.00  0.97           O  
ATOM    209  N   ARG A  54       3.974  10.011  -2.770  1.00  0.64           N  
ATOM    210  CA  ARG A  54       5.019  10.102  -1.800  1.00  0.63           C  
ATOM    211  C   ARG A  54       5.831   8.861  -1.945  1.00  0.59           C  
ATOM    212  O   ARG A  54       5.242   7.863  -2.356  1.00  0.62           O  
ATOM    213  N   THR A  55       7.144   8.835  -1.649  1.00  0.63           N  
ATOM    214  CA  THR A  55       7.964   7.672  -1.797  1.00  0.61           C  
ATOM    215  C   THR A  55       7.879   6.798  -0.594  1.00  0.59           C  
ATOM    216  O   THR A  55       7.303   7.148   0.435  1.00  0.64           O  
ATOM    217  N   LEU A  56       8.449   5.591  -0.748  1.00  0.58           N  
ATOM    218  CA  LEU A  56       8.604   4.638   0.306  1.00  0.59           C  
ATOM    219  C   LEU A  56       9.604   5.036   1.336  1.00  0.64           C  
ATOM    220  O   LEU A  56       9.432   4.906   2.547  1.00  0.70           O  
ATOM    221  N   SER A  57      10.762   5.546   0.879  1.00  0.68           N  
ATOM    222  CA  SER A  57      11.882   5.993   1.647  1.00  0.75           C  
ATOM    223  C   SER A  57      11.563   7.071   2.625  1.00  0.76           C  
ATOM    224  O   SER A  57      12.053   7.155   3.750  1.00  0.84           O  
ATOM    225  N   ASP A  58      10.686   7.999   2.205  1.00  0.75           N  
ATOM    226  CA  ASP A  58      10.232   9.120   2.968  1.00  0.78           C  
ATOM    227  C   ASP A  58       9.597   8.756   4.266  1.00  0.77           C  
ATOM    228  O   ASP A  58      10.086   9.195   5.305  1.00  0.86           O  
ATOM    229  N   TYR A  59       8.732   7.725   4.258  1.00  0.72           N  
ATOM    230  CA  TYR A  59       8.145   7.121   5.413  1.00  0.73           C  
ATOM    231  C   TYR A  59       8.986   6.060   6.037  1.00  0.76           C  
ATOM    232  O   TYR A  59       8.631   5.332   6.962  1.00  0.89           O  
ATOM    233  N   ASN A  60      10.201   5.846   5.501  1.00  0.74           N  
ATOM    234  CA  ASN A  60      11.159   4.918   6.016  1.00  0.79           C  
ATOM    235  C   ASN A  60      10.674   3.509   6.049  1.00  0.75           C  
ATOM    236  O   ASN A  60      11.058   2.740   6.929  1.00  0.86           O  
ATOM    237  N   ILE A  61       9.908   3.100   5.021  1.00  0.67           N  
ATOM    238  CA  ILE A  61       9.412   1.772   4.831  1.00  0.65           C  
ATOM    239  C   ILE A  61      10.540   0.905   4.387  1.00  0.66           C  
ATOM    240  O   ILE A  61      11.074   1.133   3.302  1.00  0.75           O  
ATOM    241  N   GLN A  62      10.902  -0.100   5.203  1.00  0.67           N  
ATOM    242  CA  GLN A  62      11.993  -0.965   4.876  1.00  0.70           C  
ATOM    243  C   GLN A  62      11.685  -2.183   4.075  1.00  0.62           C  
ATOM    244  O   GLN A  62      10.574  -2.333   3.567  1.00  0.64           O  
ATOM    245  N   LYS A  63      12.649  -3.089   3.829  1.00  0.64           N  
ATOM    246  CA  LYS A  63      12.453  -4.389   3.266  1.00  0.62           C  
ATOM    247  C   LYS A  63      11.566  -5.301   4.041  1.00  0.59           C  
ATOM    248  O   LYS A  63      11.647  -5.346   5.268  1.00  0.66           O  
ATOM    249  N   GLU A  64      10.605  -5.982   3.391  1.00  0.57           N  
ATOM    250  CA  GLU A  64       9.768  -6.962   4.012  1.00  0.58           C  
ATOM    251  C   GLU A  64       8.890  -6.382   5.068  1.00  0.56           C  
ATOM    252  O   GLU A  64       8.728  -7.013   6.111  1.00  0.70           O  
ATOM    253  N   SER A  65       8.322  -5.200   4.769  1.00  0.51           N  
ATOM    254  CA  SER A  65       7.522  -4.440   5.680  1.00  0.51           C  
ATOM    255  C   SER A  65       6.140  -4.629   5.160  1.00  0.43           C  
ATOM    256  O   SER A  65       5.975  -5.072   4.024  1.00  0.50           O  
ATOM    257  N   THR A  66       5.097  -4.327   5.953  1.00  0.45           N  
ATOM    258  CA  THR A  66       3.750  -4.554   5.529  1.00  0.45           C  
ATOM    259  C   THR A  66       2.955  -3.309   5.720  1.00  0.43           C  
ATOM    260  O   THR A  66       2.687  -2.767   6.791  1.00  0.58           O  
ATOM    261  N   LEU A  67       2.380  -2.938   4.562  1.00  0.38           N  
ATOM    262  CA  LEU A  67       1.439  -1.861   4.540  1.00  0.38           C  
ATOM    263  C   LEU A  67       0.069  -2.413   4.725  1.00  0.37           C  
ATOM    264  O   LEU A  67      -0.127  -3.621   4.589  1.00  0.50           O  
ATOM    265  N   HIS A  68      -0.930  -1.591   5.091  1.00  0.35           N  
ATOM    266  CA  HIS A  68      -2.189  -2.190   5.416  1.00  0.37           C  
ATOM    267  C   HIS A  68      -3.272  -1.536   4.628  1.00  0.35           C  
ATOM    268  O   HIS A  68      -3.415  -0.315   4.644  1.00  0.48           O  
ATOM    269  N   LEU A  69      -3.972  -2.339   3.807  1.00  0.36           N  
ATOM    270  CA  LEU A  69      -5.028  -1.835   2.985  1.00  0.38           C  
ATOM    271  C   LEU A  69      -6.310  -1.534   3.682  1.00  0.41           C  
ATOM    272  O   LEU A  69      -6.856  -2.400   4.364  1.00  0.56           O  
ATOM    273  N   VAL A  70      -6.886  -0.322   3.591  1.00  0.45           N  
ATOM    274  CA  VAL A  70      -8.183   0.049   4.064  1.00  0.56           C  
ATOM    275  C   VAL A  70      -8.854   0.579   2.843  1.00  0.55           C  
ATOM    276  O   VAL A  70      -8.190   1.167   1.991  1.00  0.58           O  
TER
ENDMDL
MODEL      10
ATOM      1  N   GLN A   2      11.422  -6.125  -1.379  1.00  0.59           N  
ATOM      2  CA  GLN A   2      10.202  -6.791  -1.045  1.00  0.56           C  
ATOM      3  C   GLN A   2       9.498  -5.973  -0.019  1.00  0.50           C  
ATOM      4  O   GLN A   2      10.068  -5.627   1.015  1.00  0.60           O  
ATOM      5  N   ILE A   3       8.192  -5.758  -0.263  1.00  0.44           N  
ATOM      6  CA  ILE A   3       7.258  -5.153   0.635  1.00  0.42           C  
ATOM      7  C   ILE A   3       5.980  -5.920   0.613  1.00  0.40           C  
ATOM      8  O   ILE A   3       5.574  -6.499  -0.393  1.00  0.50           O  
ATOM      9  N   PHE A   4       5.212  -5.904   1.718  1.00  0.37           N  
ATOM     10  CA  PHE A   4       3.941  -6.552   1.798  1.00  0.38           C  
ATOM     11  C   PHE A   4       2.771  -5.659   2.031  1.00  0.39           C  
ATOM     12  O   PHE A   4       2.875  -4.645   2.720  1.00  0.60           O  
ATOM     13  N   VAL A   5       1.598  -6.034   1.490  1.00  0.35           N  
ATOM     14  CA  VAL A   5       0.403  -5.260   1.623  1.00  0.35           C  
ATOM     15  C   VAL A   5      -0.595  -6.203   2.200  1.00  0.35           C  
ATOM     16  O   VAL A   5      -1.168  -7.020   1.480  1.00  0.46           O  
ATOM     17  N   LYS A   6      -0.973  -6.069   3.484  1.00  0.36           N  
ATOM     18  CA  LYS A   6      -1.965  -6.871   4.130  1.00  0.39           C  
ATOM     19  C   LYS A   6      -3.310  -6.242   4.010  1.00  0.46           C  
ATOM     20  O   LYS A   6      -3.511  -5.064   4.306  1.00  0.53           O  
ATOM     21  N   THR A   7      -4.295  -7.069   3.620  1.00  0.58           N  
ATOM     22  CA  THR A   7      -5.654  -6.681   3.399  1.00  0.78           C  
ATOM     23  C   THR A   7      -6.577  -6.701   4.569  1.00  0.94           C  
ATOM     24  O   THR A   7      -6.292  -7.178   5.666  1.00  0.99           O  
ATOM     25  N   LEU A   8      -7.838  -6.266   4.398  1.00  1.17           N  
ATOM     26  CA  LEU A   8      -8.911  -6.464   5.323  1.00  1.39           C  
ATOM     27  C   LEU A   8      -9.346  -7.844   5.672  1.00  1.44           C  
ATOM     28  O   LEU A   8      -9.888  -8.095   6.748  1.00  1.60           O  
ATOM     29  N   THR A   9      -9.156  -8.737   4.684  1.00  1.41           N  
ATOM     30  CA  THR A   9      -9.633 -10.074   4.864  1.00  1.51           C  
ATOM     31  C   THR A   9      -8.592 -10.816   5.629  1.00  1.37           C  
ATOM     32  O   THR A   9      -8.700 -10.899   6.851  1.00  1.62           O  
ATOM     33  N   GLY A  10      -7.565 -11.439   5.023  1.00  1.18           N  
ATOM     34  CA  GLY A  10      -6.499 -12.149   5.659  1.00  1.22           C  
ATOM     35  C   GLY A  10      -5.579 -12.644   4.597  1.00  0.99           C  
ATOM     36  O   GLY A  10      -5.141 -13.793   4.632  1.00  1.31           O  
ATOM     37  N   LYS A  11      -5.186 -11.759   3.664  1.00  0.73           N  
ATOM     38  CA  LYS A  11      -4.373 -12.009   2.514  1.00  0.60           C  
ATOM     39  C   LYS A  11      -3.263 -11.015   2.526  1.00  0.51           C  
ATOM     40  O   LYS A  11      -3.470  -9.855   2.879  1.00  0.63           O  
ATOM     41  N   THR A  12      -2.010 -11.430   2.266  1.00  0.49           N  
ATOM     42  CA  THR A  12      -0.847 -10.599   2.300  1.00  0.48           C  
ATOM     43  C   THR A  12      -0.292 -10.619   0.918  1.00  0.52           C  
ATOM     44  O   THR A  12       0.159 -11.614   0.355  1.00  0.72           O  
ATOM     45  N   ILE A  13      -0.205  -9.444   0.268  1.00  0.48           N  
ATOM     46  CA  ILE A  13       0.158  -9.351  -1.113  1.00  0.55           C  
ATOM     47  C   ILE A  13       1.637  -9.175  -1.069  1.00  0.51           C  
ATOM     48  O   ILE A  13       2.105  -8.182  -0.515  1.00  0.56           O  
ATOM     49  N   THR A  14       2.512 -10.083  -1.537  1.00  0.55           N  
ATOM     50  CA  THR A  14       3.926  -9.876  -1.562  1.00  0.54           C  
ATOM     51  C   THR A  14       4.294  -9.167  -2.819  1.00  0.55           C  
ATOM     52  O   THR A  14       4.122  -9.746  -3.890  1.00  0.72           O  
ATOM     53  N   LEU A  15       4.769  -7.914  -2.702  1.00  0.50           N  
ATOM     54  CA  LEU A  15       5.141  -7.149  -3.852  1.00  0.55           C  
ATOM     55  C   LEU A  15       6.601  -6.884  -3.985  1.00  0.52           C  
ATOM     56  O   LEU A  15       7.402  -7.149  -3.090  1.00  0.58           O  
ATOM     57  N   GLU A  16       7.096  -6.332  -5.106  1.00  0.59           N  
ATOM     58  CA  GLU A  16       8.425  -5.826  -5.256  1.00  0.63           C  
ATOM     59  C   GLU A  16       8.528  -4.415  -5.725  1.00  0.65           C  
ATOM     60  O   GLU A  16       7.968  -4.043  -6.755  1.00  0.81           O  
ATOM     61  N   VAL A  17       9.176  -3.509  -4.972  1.00  0.61           N  
ATOM     62  CA  VAL A  17       9.282  -2.151  -5.408  1.00  0.63           C  
ATOM     63  C   VAL A  17      10.717  -1.769  -5.293  1.00  0.65           C  
ATOM     64  O   VAL A  17      11.501  -2.483  -4.670  1.00  0.76           O  
ATOM     65  N   GLU A  18      11.138  -0.564  -5.718  1.00  0.68           N  
ATOM     66  CA  GLU A  18      12.370   0.015  -5.278  1.00  0.74           C  
ATOM     67  C   GLU A  18      12.257   1.109  -4.274  1.00  0.71           C  
ATOM     68  O   GLU A  18      11.185   1.706  -4.199  1.00  0.74           O  
ATOM     69  N   PRO A  19      13.142   1.536  -3.422  1.00  0.74           N  
ATOM     70  CA  PRO A  19      12.854   2.548  -2.448  1.00  0.74           C  
ATOM     71  C   PRO A  19      12.527   3.883  -3.024  1.00  0.70           C  
ATOM     72  O   PRO A  19      12.021   4.698  -2.254  1.00  0.74           O  
ATOM     73  N   SER A  20      12.669   4.186  -4.326  1.00  0.70           N  
ATOM     74  CA  SER A  20      12.222   5.383  -4.965  1.00  0.74           C  
ATOM     75  C   SER A  20      10.884   5.354  -5.621  1.00  0.71           C  
ATOM     76  O   SER A  20      10.443   6.330  -6.227  1.00  0.80           O  
ATOM     77  N   ASP A  21      10.070   4.310  -5.388  1.00  0.70           N  
ATOM     78  CA  ASP A  21       8.741   4.194  -5.902  1.00  0.73           C  
ATOM     79  C   ASP A  21       7.699   4.940  -5.142  1.00  0.64           C  
ATOM     80  O   ASP A  21       7.781   5.061  -3.920  1.00  0.66           O  
ATOM     81  N   THR A  22       6.765   5.591  -5.859  1.00  0.63           N  
ATOM     82  CA  THR A  22       5.679   6.256  -5.210  1.00  0.58           C  
ATOM     83  C   THR A  22       4.612   5.344  -4.709  1.00  0.53           C  
ATOM     84  O   THR A  22       4.404   4.252  -5.235  1.00  0.58           O  
ATOM     85  N   ILE A  23       3.830   5.867  -3.747  1.00  0.51           N  
ATOM     86  CA  ILE A  23       2.718   5.246  -3.097  1.00  0.48           C  
ATOM     87  C   ILE A  23       1.629   5.098  -4.102  1.00  0.48           C  
ATOM     88  O   ILE A  23       1.006   4.038  -4.120  1.00  0.51           O  
ATOM     89  N   GLU A  24       1.481   6.087  -5.003  1.00  0.50           N  
ATOM     90  CA  GLU A  24       0.689   5.890  -6.176  1.00  0.53           C  
ATOM     91  C   GLU A  24       1.128   4.784  -7.073  1.00  0.50           C  
ATOM     92  O   GLU A  24       0.313   4.109  -7.699  1.00  0.55           O  
ATOM     93  N   ASN A  25       2.427   4.468  -7.221  1.00  0.51           N  
ATOM     94  CA  ASN A  25       2.893   3.309  -7.918  1.00  0.52           C  
ATOM     95  C   ASN A  25       2.661   1.965  -7.318  1.00  0.47           C  
ATOM     96  O   ASN A  25       2.286   1.028  -8.020  1.00  0.53           O  
ATOM     97  N   VAL A  26       2.787   1.801  -5.989  1.00  0.45           N  
ATOM     98  CA  VAL A  26       2.340   0.649  -5.269  1.00  0.44           C  
ATOM     99  C   VAL A  26       0.915   0.303  -5.535  1.00  0.40           C  
ATOM    100  O   VAL A  26       0.464  -0.823  -5.738  1.00  0.44           O  
ATOM    101  N   LYS A  27       0.042   1.321  -5.638  1.00  0.40           N  
ATOM    102  CA  LYS A  27      -1.371   1.204  -5.824  1.00  0.41           C  
ATOM    103  C   LYS A  27      -1.723   0.554  -7.118  1.00  0.38           C  
ATOM    104  O   LYS A  27      -2.683  -0.198  -7.276  1.00  0.42           O  
ATOM    105  N   ALA A  28      -0.924   0.890  -8.147  1.00  0.39           N  
ATOM    106  CA  ALA A  28      -0.945   0.388  -9.485  1.00  0.39           C  
ATOM    107  C   ALA A  28      -0.499  -1.031  -9.572  1.00  0.36           C  
ATOM    108  O   ALA A  28      -0.793  -1.792 -10.492  1.00  0.42           O  
ATOM    109  N   LYS A  29       0.214  -1.535  -8.548  1.00  0.39           N  
ATOM    110  CA  LYS A  29       0.608  -2.908  -8.494  1.00  0.43           C  
ATOM    111  C   LYS A  29      -0.486  -3.739  -7.918  1.00  0.44           C  
ATOM    112  O   LYS A  29      -0.646  -4.862  -8.393  1.00  0.54           O  
ATOM    113  N   ILE A  30      -1.300  -3.171  -7.009  1.00  0.41           N  
ATOM    114  CA  ILE A  30      -2.489  -3.757  -6.474  1.00  0.44           C  
ATOM    115  C   ILE A  30      -3.564  -3.726  -7.503  1.00  0.45           C  
ATOM    116  O   ILE A  30      -4.359  -4.646  -7.691  1.00  0.56           O  
ATOM    117  N   GLN A  31      -3.648  -2.678  -8.342  1.00  0.41           N  
ATOM    118  CA  GLN A  31      -4.606  -2.457  -9.380  1.00  0.48           C  
ATOM    119  C   GLN A  31      -4.623  -3.586 -10.354  1.00  0.52           C  
ATOM    120  O   GLN A  31      -5.683  -4.156 -10.604  1.00  0.66           O  
ATOM    121  N   ASP A  32      -3.496  -4.050 -10.923  1.00  0.50           N  
ATOM    122  CA  ASP A  32      -3.322  -5.177 -11.785  1.00  0.60           C  
ATOM    123  C   ASP A  32      -3.870  -6.428 -11.191  1.00  0.65           C  
ATOM    124  O   ASP A  32      -4.510  -7.266 -11.825  1.00  0.81           O  
ATOM    125  N   LYS A  33      -3.637  -6.667  -9.888  1.00  0.62           N  
ATOM    126  CA  LYS A  33      -4.024  -7.890  -9.258  1.00  0.73           C  
ATOM    127  C   LYS A  33      -5.453  -7.869  -8.837  1.00  0.69           C  
ATOM    128  O   LYS A  33      -6.200  -8.746  -9.269  1.00  0.83           O  
ATOM    129  N   GLU A  34      -5.933  -6.965  -7.964  1.00  0.63           N  
ATOM    130  CA  GLU A  34      -7.220  -7.006  -7.342  1.00  0.67           C  
ATOM    131  C   GLU A  34      -8.213  -6.144  -8.043  1.00  0.69           C  
ATOM    132  O   GLU A  34      -9.401  -6.294  -7.761  1.00  0.95           O  
ATOM    133  N   GLY A  35      -7.822  -5.190  -8.906  1.00  0.63           N  
ATOM    134  CA  GLY A  35      -8.675  -4.430  -9.766  1.00  0.68           C  
ATOM    135  C   GLY A  35      -9.184  -3.259  -8.996  1.00  0.76           C  
ATOM    136  O   GLY A  35     -10.332  -2.847  -9.155  1.00  1.12           O  
ATOM    137  N   ILE A  36      -8.419  -2.735  -8.024  1.00  0.70           N  
ATOM    138  CA  ILE A  36      -8.905  -1.689  -7.177  1.00  0.76           C  
ATOM    139  C   ILE A  36      -8.277  -0.446  -7.707  1.00  0.71           C  
ATOM    140  O   ILE A  36      -7.080  -0.338  -7.971  1.00  0.73           O  
ATOM    141  N   PRO A  37      -8.982   0.630  -7.893  1.00  0.75           N  
ATOM    142  CA  PRO A  37      -8.311   1.804  -8.369  1.00  0.79           C  
ATOM    143  C   PRO A  37      -7.506   2.510  -7.333  1.00  0.75           C  
ATOM    144  O   PRO A  37      -7.741   2.131  -6.187  1.00  0.75           O  
ATOM    145  N   PRO A  38      -6.572   3.368  -7.618  1.00  0.81           N  
ATOM    146  CA  PRO A  38      -5.670   3.892  -6.634  1.00  0.85           C  
ATOM    147  C   PRO A  38      -6.293   4.834  -5.662  1.00  0.89           C  
ATOM    148  O   PRO A  38      -5.813   4.870  -4.531  1.00  0.99           O  
ATOM    149  N   ASP A  39      -7.397   5.496  -6.054  1.00  0.96           N  
ATOM    150  CA  ASP A  39      -8.122   6.422  -5.241  1.00  1.11           C  
ATOM    151  C   ASP A  39      -8.918   5.740  -4.182  1.00  1.00           C  
ATOM    152  O   ASP A  39      -9.272   6.290  -3.140  1.00  1.14           O  
ATOM    153  N   GLN A  40      -9.297   4.477  -4.447  1.00  0.87           N  
ATOM    154  CA  GLN A  40     -10.061   3.686  -3.532  1.00  0.84           C  
ATOM    155  C   GLN A  40      -9.234   2.996  -2.502  1.00  0.67           C  
ATOM    156  O   GLN A  40      -9.762   2.422  -1.551  1.00  0.80           O  
ATOM    157  N   GLN A  41      -7.902   2.984  -2.692  1.00  0.56           N  
ATOM    158  CA  GLN A  41      -7.051   2.301  -1.767  1.00  0.51           C  
ATOM    159  C   GLN A  41      -6.598   3.220  -0.685  1.00  0.49           C  
ATOM    160  O   GLN A  41      -5.993   4.264  -0.923  1.00  0.65           O  
ATOM    161  N   ARG A  42      -6.903   2.838   0.568  1.00  0.47           N  
ATOM    162  CA  ARG A  42      -6.321   3.436   1.729  1.00  0.55           C  
ATOM    163  C   ARG A  42      -5.232   2.599   2.306  1.00  0.46           C  
ATOM    164  O   ARG A  42      -5.454   1.583   2.961  1.00  0.52           O  
ATOM    165  N   LEU A  43      -3.991   3.035   2.022  1.00  0.46           N  
ATOM    166  CA  LEU A  43      -2.837   2.451   2.636  1.00  0.42           C  
ATOM    167  C   LEU A  43      -2.467   2.992   3.974  1.00  0.43           C  
ATOM    168  O   LEU A  43      -2.304   4.202   4.118  1.00  0.55           O  
ATOM    169  N   ILE A  44      -2.328   2.156   5.019  1.00  0.42           N  
ATOM    170  CA  ILE A  44      -1.967   2.481   6.364  1.00  0.46           C  
ATOM    171  C   ILE A  44      -0.722   1.741   6.710  1.00  0.42           C  
ATOM    172  O   ILE A  44      -0.620   0.519   6.615  1.00  0.53           O  
ATOM    173  N   PHE A  45       0.302   2.488   7.161  1.00  0.42           N  
ATOM    174  CA  PHE A  45       1.523   1.939   7.665  1.00  0.46           C  
ATOM    175  C   PHE A  45       1.895   2.586   8.954  1.00  0.68           C  
ATOM    176  O   PHE A  45       1.980   3.811   9.024  1.00  1.50           O  
ATOM    177  N   ALA A  46       2.142   1.786  10.005  1.00  0.81           N  
ATOM    178  CA  ALA A  46       2.509   2.160  11.336  1.00  0.96           C  
ATOM    179  C   ALA A  46       1.502   2.939  12.111  1.00  0.97           C  
ATOM    180  O   ALA A  46       1.268   2.696  13.294  1.00  1.21           O  
ATOM    181  N   GLY A  47       0.801   3.897  11.480  1.00  0.99           N  
ATOM    182  CA  GLY A  47      -0.247   4.726  11.992  1.00  1.10           C  
ATOM    183  C   GLY A  47      -0.482   5.905  11.113  1.00  1.03           C  
ATOM    184  O   GLY A  47      -1.488   6.594  11.272  1.00  1.30           O  
ATOM    185  N   LYS A  48       0.373   6.120  10.097  1.00  0.98           N  
ATOM    186  CA  LYS A  48       0.258   7.129   9.089  1.00  1.05           C  
ATOM    187  C   LYS A  48      -0.420   6.591   7.876  1.00  0.84           C  
ATOM    188  O   LYS A  48      -0.051   5.559   7.316  1.00  0.81           O  
ATOM    189  N   GLN A  49      -1.411   7.335   7.355  1.00  0.84           N  
ATOM    190  CA  GLN A  49      -1.996   6.964   6.105  1.00  0.80           C  
ATOM    191  C   GLN A  49      -1.186   7.601   5.029  1.00  0.72           C  
ATOM    192  O   GLN A  49      -0.529   8.626   5.211  1.00  0.83           O  
ATOM    193  N   LEU A  50      -1.079   6.957   3.853  1.00  0.69           N  
ATOM    194  CA  LEU A  50      -0.090   7.110   2.832  1.00  0.66           C  
ATOM    195  C   LEU A  50      -0.666   7.814   1.652  1.00  0.72           C  
ATOM    196  O   LEU A  50      -1.604   7.308   1.038  1.00  0.90           O  
ATOM    197  N   GLU A  51       0.000   8.952   1.392  1.00  0.70           N  
ATOM    198  CA  GLU A  51      -0.255   9.864   0.320  1.00  0.76           C  
ATOM    199  C   GLU A  51       0.496   9.496  -0.914  1.00  0.77           C  
ATOM    200  O   GLU A  51       1.658   9.101  -0.989  1.00  1.23           O  
ATOM    201  N   ASP A  52      -0.173   9.572  -2.078  1.00  0.66           N  
ATOM    202  CA  ASP A  52       0.072   9.129  -3.416  1.00  0.65           C  
ATOM    203  C   ASP A  52       1.325   9.624  -4.052  1.00  0.60           C  
ATOM    204  O   ASP A  52       2.190   8.846  -4.450  1.00  0.62           O  
ATOM    205  N   GLY A  53       1.502  10.950  -4.200  1.00  0.68           N  
ATOM    206  CA  GLY A  53       2.714  11.507  -4.715  1.00  0.73           C  
ATOM    207  C   GLY A  53       3.835  11.643  -3.743  1.00  0.72           C  
ATOM    208  O   GLY A  53       4.712  12.490  -3.907  1.00  0.97           O  
ATOM    209  N   ARG A  54       3.932  10.787  -2.710  1.00  0.64           N  
ATOM    210  CA  ARG A  54       5.104  10.632  -1.906  1.00  0.63           C  
ATOM    211  C   ARG A  54       5.767   9.350  -2.279  1.00  0.59           C  
ATOM    212  O   ARG A  54       5.181   8.430  -2.847  1.00  0.62           O  
ATOM    213  N   THR A  55       7.084   9.251  -2.025  1.00  0.63           N  
ATOM    214  CA  THR A  55       7.785   8.017  -2.191  1.00  0.61           C  
ATOM    215  C   THR A  55       7.807   7.285  -0.892  1.00  0.59           C  
ATOM    216  O   THR A  55       7.628   7.868   0.175  1.00  0.64           O  
ATOM    217  N   LEU A  56       8.254   6.017  -0.929  1.00  0.58           N  
ATOM    218  CA  LEU A  56       8.621   5.166   0.160  1.00  0.59           C  
ATOM    219  C   LEU A  56       9.685   5.700   1.056  1.00  0.64           C  
ATOM    220  O   LEU A  56       9.717   5.449   2.260  1.00  0.70           O  
ATOM    221  N   SER A  57      10.688   6.305   0.396  1.00  0.68           N  
ATOM    222  CA  SER A  57      11.863   6.922   0.932  1.00  0.75           C  
ATOM    223  C   SER A  57      11.621   8.123   1.779  1.00  0.76           C  
ATOM    224  O   SER A  57      12.309   8.315   2.781  1.00  0.84           O  
ATOM    225  N   ASP A  58      10.559   8.876   1.446  1.00  0.75           N  
ATOM    226  CA  ASP A  58      10.070  10.056   2.090  1.00  0.78           C  
ATOM    227  C   ASP A  58       9.226   9.743   3.276  1.00  0.77           C  
ATOM    228  O   ASP A  58       9.111  10.559   4.189  1.00  0.86           O  
ATOM    229  N   TYR A  59       8.666   8.524   3.370  1.00  0.72           N  
ATOM    230  CA  TYR A  59       7.949   8.092   4.531  1.00  0.73           C  
ATOM    231  C   TYR A  59       8.881   7.276   5.358  1.00  0.76           C  
ATOM    232  O   TYR A  59       8.692   7.091   6.560  1.00  0.89           O  
ATOM    233  N   ASN A  60      10.053   6.879   4.831  1.00  0.74           N  
ATOM    234  CA  ASN A  60      11.103   6.092   5.400  1.00  0.79           C  
ATOM    235  C   ASN A  60      10.664   4.686   5.622  1.00  0.75           C  
ATOM    236  O   ASN A  60      10.855   3.978   6.609  1.00  0.86           O  
ATOM    237  N   ILE A  61       9.954   4.162   4.607  1.00  0.67           N  
ATOM    238  CA  ILE A  61       9.530   2.804   4.465  1.00  0.65           C  
ATOM    239  C   ILE A  61      10.515   1.942   3.751  1.00  0.66           C  
ATOM    240  O   ILE A  61      10.820   2.001   2.562  1.00  0.75           O  
ATOM    241  N   GLN A  62      11.051   0.982   4.526  1.00  0.67           N  
ATOM    242  CA  GLN A  62      12.133   0.179   4.048  1.00  0.70           C  
ATOM    243  C   GLN A  62      11.527  -1.123   3.652  1.00  0.62           C  
ATOM    244  O   GLN A  62      10.324  -1.250   3.434  1.00  0.64           O  
ATOM    245  N   LYS A  63      12.328  -2.181   3.431  1.00  0.64           N  
ATOM    246  CA  LYS A  63      11.875  -3.491   3.079  1.00  0.62           C  
ATOM    247  C   LYS A  63      11.230  -4.332   4.127  1.00  0.59           C  
ATOM    248  O   LYS A  63      11.177  -4.004   5.312  1.00  0.66           O  
ATOM    249  N   GLU A  64      10.559  -5.428   3.728  1.00  0.57           N  
ATOM    250  CA  GLU A  64       9.971  -6.343   4.656  1.00  0.58           C  
ATOM    251  C   GLU A  64       8.881  -5.795   5.511  1.00  0.56           C  
ATOM    252  O   GLU A  64       8.399  -6.414   6.459  1.00  0.70           O  
ATOM    253  N   SER A  65       8.346  -4.655   5.041  1.00  0.51           N  
ATOM    254  CA  SER A  65       7.356  -3.880   5.722  1.00  0.51           C  
ATOM    255  C   SER A  65       5.999  -4.337   5.307  1.00  0.43           C  
ATOM    256  O   SER A  65       5.780  -4.819   4.197  1.00  0.50           O  
ATOM    257  N   THR A  66       5.057  -4.162   6.250  1.00  0.45           N  
ATOM    258  CA  THR A  66       3.694  -4.582   6.150  1.00  0.45           C  
ATOM    259  C   THR A  66       2.744  -3.437   6.225  1.00  0.43           C  
ATOM    260  O   THR A  66       2.315  -2.980   7.283  1.00  0.58           O  
ATOM    261  N   LEU A  67       2.404  -2.937   5.024  1.00  0.38           N  
ATOM    262  CA  LEU A  67       1.466  -1.938   4.617  1.00  0.38           C  
ATOM    263  C   LEU A  67       0.085  -2.491   4.698  1.00  0.37           C  
ATOM    264  O   LEU A  67      -0.119  -3.666   4.398  1.00  0.50           O  
ATOM    265  N   HIS A  68      -0.917  -1.756   5.214  1.00  0.35           N  
ATOM    266  CA  HIS A  68      -2.247  -2.265   5.342  1.00  0.37           C  
ATOM    267  C   HIS A  68      -3.166  -1.653   4.342  1.00  0.35           C  
ATOM    268  O   HIS A  68      -3.056  -0.454   4.092  1.00  0.48           O  
ATOM    269  N   LEU A  69      -3.977  -2.448   3.621  1.00  0.36           N  
ATOM    270  CA  LEU A  69      -4.829  -1.952   2.585  1.00  0.38           C  
ATOM    271  C   LEU A  69      -6.231  -2.139   3.053  1.00  0.41           C  
ATOM    272  O   LEU A  69      -6.861  -3.189   3.172  1.00  0.56           O  
ATOM    273  N   VAL A  70      -6.824  -0.955   3.280  1.00  0.45           N  
ATOM    274  CA  VAL A  70      -8.184  -0.675   3.627  1.00  0.56           C  
ATOM    275  C   VAL A  70      -8.788  -0.077   2.404  1.00  0.55           C  
ATOM    276  O   VAL A  70      -8.129   0.623   1.638  1.00  0.58           O  
TER
ENDMDL
MODEL      11
ATOM      1  N   GLN A   2      11.169  -6.413  -1.830  1.00  0.59           N  
ATOM      2  CA  GLN A   2       9.874  -6.953  -1.558  1.00  0.56           C  
ATOM      3  C   GLN A   2       9.158  -6.275  -0.440  1.00  0.50           C  
ATOM      4  O   GLN A   2       9.815  -6.046   0.574  1.00  0.60           O  
ATOM      5  N   ILE A   3       7.886  -5.878  -0.619  1.00  0.44           N  
ATOM      6  CA  ILE A   3       7.116  -5.367   0.473  1.00  0.42           C  
ATOM      7  C   ILE A   3       5.863  -6.154   0.652  1.00  0.40           C  
ATOM      8  O   ILE A   3       5.384  -6.788  -0.287  1.00  0.50           O  
ATOM      9  N   PHE A   4       5.198  -6.136   1.820  1.00  0.37           N  
ATOM     10  CA  PHE A   4       3.988  -6.847   2.095  1.00  0.38           C  
ATOM     11  C   PHE A   4       2.818  -5.942   2.276  1.00  0.39           C  
ATOM     12  O   PHE A   4       2.822  -4.900   2.929  1.00  0.60           O  
ATOM     13  N   VAL A   5       1.691  -6.328   1.651  1.00  0.35           N  
ATOM     14  CA  VAL A   5       0.510  -5.541   1.826  1.00  0.35           C  
ATOM     15  C   VAL A   5      -0.557  -6.481   2.272  1.00  0.35           C  
ATOM     16  O   VAL A   5      -0.794  -7.463   1.570  1.00  0.46           O  
ATOM     17  N   LYS A   6      -1.180  -6.158   3.419  1.00  0.36           N  
ATOM     18  CA  LYS A   6      -2.267  -6.960   3.889  1.00  0.39           C  
ATOM     19  C   LYS A   6      -3.597  -6.337   3.641  1.00  0.46           C  
ATOM     20  O   LYS A   6      -3.680  -5.110   3.660  1.00  0.53           O  
ATOM     21  N   THR A   7      -4.620  -7.184   3.422  1.00  0.58           N  
ATOM     22  CA  THR A   7      -5.959  -6.773   3.134  1.00  0.78           C  
ATOM     23  C   THR A   7      -6.877  -6.787   4.308  1.00  0.94           C  
ATOM     24  O   THR A   7      -6.696  -7.498   5.295  1.00  0.99           O  
ATOM     25  N   LEU A   8      -7.992  -6.037   4.252  1.00  1.17           N  
ATOM     26  CA  LEU A   8      -9.021  -6.129   5.241  1.00  1.39           C  
ATOM     27  C   LEU A   8      -9.525  -7.487   5.589  1.00  1.44           C  
ATOM     28  O   LEU A   8      -9.770  -7.815   6.749  1.00  1.60           O  
ATOM     29  N   THR A   9      -9.631  -8.312   4.532  1.00  1.41           N  
ATOM     30  CA  THR A   9     -10.227  -9.611   4.484  1.00  1.51           C  
ATOM     31  C   THR A   9      -9.291 -10.680   4.934  1.00  1.37           C  
ATOM     32  O   THR A   9      -9.571 -11.872   5.049  1.00  1.62           O  
ATOM     33  N   GLY A  10      -8.023 -10.243   5.034  1.00  1.18           N  
ATOM     34  CA  GLY A  10      -7.003 -11.095   5.561  1.00  1.22           C  
ATOM     35  C   GLY A  10      -5.974 -11.583   4.599  1.00  0.99           C  
ATOM     36  O   GLY A  10      -5.158 -12.429   4.962  1.00  1.31           O  
ATOM     37  N   LYS A  11      -5.891 -11.152   3.328  1.00  0.73           N  
ATOM     38  CA  LYS A  11      -4.945 -11.581   2.346  1.00  0.60           C  
ATOM     39  C   LYS A  11      -3.657 -10.865   2.566  1.00  0.51           C  
ATOM     40  O   LYS A  11      -3.661  -9.732   3.044  1.00  0.63           O  
ATOM     41  N   THR A  12      -2.514 -11.535   2.335  1.00  0.49           N  
ATOM     42  CA  THR A  12      -1.271 -10.837   2.466  1.00  0.48           C  
ATOM     43  C   THR A  12      -0.530 -11.024   1.187  1.00  0.52           C  
ATOM     44  O   THR A  12       0.176 -12.018   1.031  1.00  0.72           O  
ATOM     45  N   ILE A  13      -0.658 -10.067   0.250  1.00  0.48           N  
ATOM     46  CA  ILE A  13       0.019  -9.957  -1.005  1.00  0.55           C  
ATOM     47  C   ILE A  13       1.422  -9.479  -0.854  1.00  0.51           C  
ATOM     48  O   ILE A  13       1.733  -8.664   0.013  1.00  0.56           O  
ATOM     49  N   THR A  14       2.367 -10.002  -1.656  1.00  0.55           N  
ATOM     50  CA  THR A  14       3.728  -9.572  -1.736  1.00  0.54           C  
ATOM     51  C   THR A  14       3.826  -8.883  -3.054  1.00  0.55           C  
ATOM     52  O   THR A  14       3.384  -9.483  -4.032  1.00  0.72           O  
ATOM     53  N   LEU A  15       4.379  -7.656  -3.052  1.00  0.50           N  
ATOM     54  CA  LEU A  15       4.520  -6.817  -4.201  1.00  0.55           C  
ATOM     55  C   LEU A  15       5.979  -6.615  -4.426  1.00  0.52           C  
ATOM     56  O   LEU A  15       6.842  -6.913  -3.601  1.00  0.58           O  
ATOM     57  N   GLU A  16       6.370  -6.119  -5.614  1.00  0.59           N  
ATOM     58  CA  GLU A  16       7.743  -5.854  -5.913  1.00  0.63           C  
ATOM     59  C   GLU A  16       7.851  -4.382  -6.119  1.00  0.65           C  
ATOM     60  O   GLU A  16       7.225  -3.862  -7.042  1.00  0.81           O  
ATOM     61  N   VAL A  17       8.679  -3.641  -5.361  1.00  0.61           N  
ATOM     62  CA  VAL A  17       8.909  -2.238  -5.520  1.00  0.63           C  
ATOM     63  C   VAL A  17      10.340  -1.821  -5.522  1.00  0.65           C  
ATOM     64  O   VAL A  17      11.154  -2.649  -5.115  1.00  0.76           O  
ATOM     65  N   GLU A  18      10.580  -0.553  -5.901  1.00  0.68           N  
ATOM     66  CA  GLU A  18      11.850   0.076  -5.710  1.00  0.74           C  
ATOM     67  C   GLU A  18      11.641   1.216  -4.773  1.00  0.71           C  
ATOM     68  O   GLU A  18      10.490   1.595  -4.562  1.00  0.74           O  
ATOM     69  N   PRO A  19      12.596   1.772  -4.089  1.00  0.74           N  
ATOM     70  CA  PRO A  19      12.386   2.828  -3.142  1.00  0.74           C  
ATOM     71  C   PRO A  19      11.899   4.082  -3.781  1.00  0.70           C  
ATOM     72  O   PRO A  19      11.347   4.928  -3.079  1.00  0.74           O  
ATOM     73  N   SER A  20      12.238   4.231  -5.074  1.00  0.70           N  
ATOM     74  CA  SER A  20      11.724   5.287  -5.891  1.00  0.74           C  
ATOM     75  C   SER A  20      10.372   5.096  -6.486  1.00  0.71           C  
ATOM     76  O   SER A  20       9.884   5.955  -7.217  1.00  0.80           O  
ATOM     77  N   ASP A  21       9.655   3.999  -6.181  1.00  0.70           N  
ATOM     78  CA  ASP A  21       8.303   3.857  -6.626  1.00  0.73           C  
ATOM     79  C   ASP A  21       7.410   4.721  -5.802  1.00  0.64           C  
ATOM     80  O   ASP A  21       7.618   4.918  -4.606  1.00  0.66           O  
ATOM     81  N   THR A  22       6.435   5.431  -6.398  1.00  0.63           N  
ATOM     82  CA  THR A  22       5.504   6.226  -5.659  1.00  0.58           C  
ATOM     83  C   THR A  22       4.489   5.401  -4.946  1.00  0.53           C  
ATOM     84  O   THR A  22       4.298   4.219  -5.227  1.00  0.58           O  
ATOM     85  N   ILE A  23       3.892   5.976  -3.887  1.00  0.51           N  
ATOM     86  CA  ILE A  23       2.772   5.374  -3.233  1.00  0.48           C  
ATOM     87  C   ILE A  23       1.613   5.091  -4.127  1.00  0.48           C  
ATOM     88  O   ILE A  23       0.931   4.069  -4.066  1.00  0.51           O  
ATOM     89  N   GLU A  24       1.355   5.903  -5.166  1.00  0.50           N  
ATOM     90  CA  GLU A  24       0.503   5.712  -6.298  1.00  0.53           C  
ATOM     91  C   GLU A  24       0.928   4.512  -7.071  1.00  0.50           C  
ATOM     92  O   GLU A  24       0.094   3.730  -7.526  1.00  0.55           O  
ATOM     93  N   ASN A  25       2.219   4.257  -7.349  1.00  0.51           N  
ATOM     94  CA  ASN A  25       2.698   3.081  -8.008  1.00  0.52           C  
ATOM     95  C   ASN A  25       2.482   1.882  -7.150  1.00  0.47           C  
ATOM     96  O   ASN A  25       2.058   0.859  -7.682  1.00  0.53           O  
ATOM     97  N   VAL A  26       2.531   1.969  -5.808  1.00  0.45           N  
ATOM     98  CA  VAL A  26       2.214   0.821  -5.016  1.00  0.44           C  
ATOM     99  C   VAL A  26       0.772   0.511  -5.220  1.00  0.40           C  
ATOM    100  O   VAL A  26       0.348  -0.623  -5.432  1.00  0.44           O  
ATOM    101  N   LYS A  27      -0.140   1.488  -5.067  1.00  0.40           N  
ATOM    102  CA  LYS A  27      -1.541   1.269  -5.249  1.00  0.41           C  
ATOM    103  C   LYS A  27      -1.859   0.787  -6.624  1.00  0.38           C  
ATOM    104  O   LYS A  27      -2.712  -0.079  -6.816  1.00  0.42           O  
ATOM    105  N   ALA A  28      -1.104   1.229  -7.644  1.00  0.39           N  
ATOM    106  CA  ALA A  28      -1.143   0.750  -8.992  1.00  0.39           C  
ATOM    107  C   ALA A  28      -0.714  -0.660  -9.213  1.00  0.36           C  
ATOM    108  O   ALA A  28      -1.135  -1.245 -10.209  1.00  0.42           O  
ATOM    109  N   LYS A  29       0.034  -1.354  -8.337  1.00  0.39           N  
ATOM    110  CA  LYS A  29       0.392  -2.730  -8.488  1.00  0.43           C  
ATOM    111  C   LYS A  29      -0.731  -3.539  -7.938  1.00  0.44           C  
ATOM    112  O   LYS A  29      -0.798  -4.729  -8.241  1.00  0.54           O  
ATOM    113  N   ILE A  30      -1.600  -2.937  -7.107  1.00  0.41           N  
ATOM    114  CA  ILE A  30      -2.678  -3.666  -6.511  1.00  0.44           C  
ATOM    115  C   ILE A  30      -3.836  -3.630  -7.448  1.00  0.45           C  
ATOM    116  O   ILE A  30      -4.597  -4.587  -7.577  1.00  0.56           O  
ATOM    117  N   GLN A  31      -3.848  -2.592  -8.301  1.00  0.41           N  
ATOM    118  CA  GLN A  31      -4.719  -2.583  -9.435  1.00  0.48           C  
ATOM    119  C   GLN A  31      -4.496  -3.591 -10.510  1.00  0.52           C  
ATOM    120  O   GLN A  31      -5.382  -4.302 -10.981  1.00  0.66           O  
ATOM    121  N   ASP A  32      -3.203  -3.744 -10.848  1.00  0.50           N  
ATOM    122  CA  ASP A  32      -2.773  -4.831 -11.670  1.00  0.60           C  
ATOM    123  C   ASP A  32      -3.094  -6.132 -11.019  1.00  0.65           C  
ATOM    124  O   ASP A  32      -3.866  -6.909 -11.580  1.00  0.81           O  
ATOM    125  N   LYS A  33      -2.551  -6.467  -9.835  1.00  0.62           N  
ATOM    126  CA  LYS A  33      -2.801  -7.770  -9.301  1.00  0.73           C  
ATOM    127  C   LYS A  33      -4.190  -8.046  -8.836  1.00  0.69           C  
ATOM    128  O   LYS A  33      -4.860  -8.926  -9.373  1.00  0.83           O  
ATOM    129  N   GLU A  34      -4.709  -7.358  -7.805  1.00  0.63           N  
ATOM    130  CA  GLU A  34      -5.956  -7.735  -7.216  1.00  0.67           C  
ATOM    131  C   GLU A  34      -7.161  -7.142  -7.862  1.00  0.69           C  
ATOM    132  O   GLU A  34      -8.278  -7.657  -7.863  1.00  0.95           O  
ATOM    133  N   GLY A  35      -7.018  -5.906  -8.371  1.00  0.63           N  
ATOM    134  CA  GLY A  35      -8.011  -5.305  -9.206  1.00  0.68           C  
ATOM    135  C   GLY A  35      -8.710  -4.151  -8.572  1.00  0.76           C  
ATOM    136  O   GLY A  35      -9.922  -3.948  -8.625  1.00  1.12           O  
ATOM    137  N   ILE A  36      -7.942  -3.410  -7.755  1.00  0.70           N  
ATOM    138  CA  ILE A  36      -8.546  -2.412  -6.927  1.00  0.76           C  
ATOM    139  C   ILE A  36      -8.138  -1.102  -7.508  1.00  0.71           C  
ATOM    140  O   ILE A  36      -6.965  -0.814  -7.738  1.00  0.73           O  
ATOM    141  N   PRO A  37      -9.002  -0.210  -7.890  1.00  0.75           N  
ATOM    142  CA  PRO A  37      -8.565   1.031  -8.463  1.00  0.79           C  
ATOM    143  C   PRO A  37      -7.884   1.912  -7.475  1.00  0.75           C  
ATOM    144  O   PRO A  37      -8.307   1.845  -6.322  1.00  0.75           O  
ATOM    145  N   PRO A  38      -6.891   2.700  -7.763  1.00  0.81           N  
ATOM    146  CA  PRO A  38      -6.122   3.425  -6.793  1.00  0.85           C  
ATOM    147  C   PRO A  38      -6.821   4.496  -6.029  1.00  0.89           C  
ATOM    148  O   PRO A  38      -6.429   4.809  -4.906  1.00  0.99           O  
ATOM    149  N   ASP A  39      -7.871   5.187  -6.508  1.00  0.96           N  
ATOM    150  CA  ASP A  39      -8.720   6.045  -5.741  1.00  1.11           C  
ATOM    151  C   ASP A  39      -9.392   5.422  -4.566  1.00  1.00           C  
ATOM    152  O   ASP A  39      -9.776   6.060  -3.587  1.00  1.14           O  
ATOM    153  N   GLN A  40      -9.696   4.119  -4.706  1.00  0.87           N  
ATOM    154  CA  GLN A  40     -10.408   3.302  -3.773  1.00  0.84           C  
ATOM    155  C   GLN A  40      -9.569   2.854  -2.626  1.00  0.67           C  
ATOM    156  O   GLN A  40     -10.096   2.621  -1.540  1.00  0.80           O  
ATOM    157  N   GLN A  41      -8.235   2.764  -2.768  1.00  0.56           N  
ATOM    158  CA  GLN A  41      -7.325   2.237  -1.799  1.00  0.51           C  
ATOM    159  C   GLN A  41      -6.801   3.283  -0.877  1.00  0.49           C  
ATOM    160  O   GLN A  41      -6.499   4.414  -1.251  1.00  0.65           O  
ATOM    161  N   ARG A  42      -6.523   2.894   0.381  1.00  0.47           N  
ATOM    162  CA  ARG A  42      -5.702   3.652   1.273  1.00  0.55           C  
ATOM    163  C   ARG A  42      -4.572   2.786   1.712  1.00  0.46           C  
ATOM    164  O   ARG A  42      -4.812   1.617   2.011  1.00  0.52           O  
ATOM    165  N   LEU A  43      -3.359   3.309   1.966  1.00  0.46           N  
ATOM    166  CA  LEU A  43      -2.341   2.477   2.529  1.00  0.42           C  
ATOM    167  C   LEU A  43      -1.854   3.031   3.824  1.00  0.43           C  
ATOM    168  O   LEU A  43      -1.355   4.155   3.823  1.00  0.55           O  
ATOM    169  N   ILE A  44      -2.088   2.313   4.938  1.00  0.42           N  
ATOM    170  CA  ILE A  44      -1.727   2.728   6.259  1.00  0.46           C  
ATOM    171  C   ILE A  44      -0.526   1.994   6.748  1.00  0.42           C  
ATOM    172  O   ILE A  44      -0.587   0.767   6.802  1.00  0.53           O  
ATOM    173  N   PHE A  45       0.599   2.685   7.004  1.00  0.42           N  
ATOM    174  CA  PHE A  45       1.701   2.056   7.662  1.00  0.46           C  
ATOM    175  C   PHE A  45       1.816   2.716   8.993  1.00  0.68           C  
ATOM    176  O   PHE A  45       1.626   3.925   9.118  1.00  1.50           O  
ATOM    177  N   ALA A  46       1.930   1.892  10.050  1.00  0.81           N  
ATOM    178  CA  ALA A  46       2.208   2.308  11.390  1.00  0.96           C  
ATOM    179  C   ALA A  46       0.969   2.761  12.081  1.00  0.97           C  
ATOM    180  O   ALA A  46       0.680   2.305  13.186  1.00  1.21           O  
ATOM    181  N   GLY A  47       0.125   3.545  11.384  1.00  0.99           N  
ATOM    182  CA  GLY A  47      -1.026   4.168  11.961  1.00  1.10           C  
ATOM    183  C   GLY A  47      -1.365   5.338  11.104  1.00  1.03           C  
ATOM    184  O   GLY A  47      -2.363   5.961  11.465  1.00  1.30           O  
ATOM    185  N   LYS A  48      -0.581   5.715  10.078  1.00  0.98           N  
ATOM    186  CA  LYS A  48      -0.802   6.873   9.268  1.00  1.05           C  
ATOM    187  C   LYS A  48      -0.906   6.563   7.814  1.00  0.84           C  
ATOM    188  O   LYS A  48      -0.305   5.640   7.266  1.00  0.81           O  
ATOM    189  N   GLN A  49      -1.776   7.275   7.078  1.00  0.84           N  
ATOM    190  CA  GLN A  49      -1.942   7.224   5.658  1.00  0.80           C  
ATOM    191  C   GLN A  49      -0.813   7.782   4.862  1.00  0.72           C  
ATOM    192  O   GLN A  49      -0.184   8.779   5.209  1.00  0.83           O  
ATOM    193  N   LEU A  50      -0.478   7.077   3.766  1.00  0.69           N  
ATOM    194  CA  LEU A  50       0.624   7.384   2.908  1.00  0.66           C  
ATOM    195  C   LEU A  50       0.045   8.121   1.750  1.00  0.72           C  
ATOM    196  O   LEU A  50      -0.688   7.614   0.901  1.00  0.90           O  
ATOM    197  N   GLU A  51       0.575   9.343   1.564  1.00  0.70           N  
ATOM    198  CA  GLU A  51       0.267  10.207   0.466  1.00  0.76           C  
ATOM    199  C   GLU A  51       0.819   9.779  -0.849  1.00  0.77           C  
ATOM    200  O   GLU A  51       2.001   9.494  -1.036  1.00  1.23           O  
ATOM    201  N   ASP A  52      -0.135   9.576  -1.775  1.00  0.66           N  
ATOM    202  CA  ASP A  52       0.012   9.015  -3.082  1.00  0.65           C  
ATOM    203  C   ASP A  52       1.179   9.533  -3.850  1.00  0.60           C  
ATOM    204  O   ASP A  52       1.986   8.747  -4.345  1.00  0.62           O  
ATOM    205  N   GLY A  53       1.338  10.857  -4.022  1.00  0.68           N  
ATOM    206  CA  GLY A  53       2.476  11.484  -4.618  1.00  0.73           C  
ATOM    207  C   GLY A  53       3.713  11.635  -3.801  1.00  0.72           C  
ATOM    208  O   GLY A  53       4.434  12.631  -3.816  1.00  0.97           O  
ATOM    209  N   ARG A  54       4.086  10.632  -2.986  1.00  0.64           N  
ATOM    210  CA  ARG A  54       5.345  10.532  -2.317  1.00  0.63           C  
ATOM    211  C   ARG A  54       5.926   9.214  -2.698  1.00  0.59           C  
ATOM    212  O   ARG A  54       5.284   8.366  -3.318  1.00  0.62           O  
ATOM    213  N   THR A  55       7.217   8.987  -2.396  1.00  0.63           N  
ATOM    214  CA  THR A  55       7.809   7.690  -2.508  1.00  0.61           C  
ATOM    215  C   THR A  55       7.881   6.896  -1.249  1.00  0.59           C  
ATOM    216  O   THR A  55       7.533   7.381  -0.174  1.00  0.64           O  
ATOM    217  N   LEU A  56       8.348   5.636  -1.324  1.00  0.58           N  
ATOM    218  CA  LEU A  56       8.612   4.724  -0.255  1.00  0.59           C  
ATOM    219  C   LEU A  56       9.842   5.136   0.480  1.00  0.64           C  
ATOM    220  O   LEU A  56      10.113   4.907   1.658  1.00  0.70           O  
ATOM    221  N   SER A  57      10.720   5.910  -0.183  1.00  0.68           N  
ATOM    222  CA  SER A  57      11.941   6.554   0.190  1.00  0.75           C  
ATOM    223  C   SER A  57      11.811   7.817   0.971  1.00  0.76           C  
ATOM    224  O   SER A  57      12.428   7.984   2.022  1.00  0.84           O  
ATOM    225  N   ASP A  58      10.842   8.659   0.571  1.00  0.75           N  
ATOM    226  CA  ASP A  58      10.395   9.801   1.306  1.00  0.78           C  
ATOM    227  C   ASP A  58       9.793   9.409   2.613  1.00  0.77           C  
ATOM    228  O   ASP A  58      10.001  10.005   3.668  1.00  0.86           O  
ATOM    229  N   TYR A  59       9.133   8.242   2.714  1.00  0.72           N  
ATOM    230  CA  TYR A  59       8.559   7.786   3.943  1.00  0.73           C  
ATOM    231  C   TYR A  59       9.478   6.906   4.721  1.00  0.76           C  
ATOM    232  O   TYR A  59       9.124   6.601   5.858  1.00  0.89           O  
ATOM    233  N   ASN A  60      10.705   6.594   4.269  1.00  0.74           N  
ATOM    234  CA  ASN A  60      11.623   5.676   4.868  1.00  0.79           C  
ATOM    235  C   ASN A  60      11.077   4.343   5.248  1.00  0.75           C  
ATOM    236  O   ASN A  60      11.095   3.903   6.398  1.00  0.86           O  
ATOM    237  N   ILE A  61      10.458   3.696   4.245  1.00  0.67           N  
ATOM    238  CA  ILE A  61       9.898   2.381   4.229  1.00  0.65           C  
ATOM    239  C   ILE A  61      10.898   1.452   3.633  1.00  0.66           C  
ATOM    240  O   ILE A  61      11.532   1.774   2.630  1.00  0.75           O  
ATOM    241  N   GLN A  62      11.171   0.333   4.328  1.00  0.67           N  
ATOM    242  CA  GLN A  62      12.243  -0.505   3.886  1.00  0.70           C  
ATOM    243  C   GLN A  62      11.835  -1.745   3.170  1.00  0.62           C  
ATOM    244  O   GLN A  62      10.633  -1.959   3.023  1.00  0.64           O  
ATOM    245  N   LYS A  63      12.752  -2.702   2.937  1.00  0.64           N  
ATOM    246  CA  LYS A  63      12.389  -4.053   2.643  1.00  0.62           C  
ATOM    247  C   LYS A  63      11.515  -4.684   3.672  1.00  0.59           C  
ATOM    248  O   LYS A  63      11.694  -4.499   4.874  1.00  0.66           O  
ATOM    249  N   GLU A  64      10.507  -5.465   3.244  1.00  0.57           N  
ATOM    250  CA  GLU A  64       9.705  -6.220   4.156  1.00  0.58           C  
ATOM    251  C   GLU A  64       8.925  -5.524   5.218  1.00  0.56           C  
ATOM    252  O   GLU A  64       8.913  -5.866   6.400  1.00  0.70           O  
ATOM    253  N   SER A  65       8.139  -4.530   4.768  1.00  0.51           N  
ATOM    254  CA  SER A  65       7.329  -3.591   5.480  1.00  0.51           C  
ATOM    255  C   SER A  65       5.898  -3.995   5.379  1.00  0.43           C  
ATOM    256  O   SER A  65       5.535  -4.552   4.344  1.00  0.50           O  
ATOM    257  N   THR A  66       5.100  -3.977   6.460  1.00  0.45           N  
ATOM    258  CA  THR A  66       3.749  -4.438   6.357  1.00  0.45           C  
ATOM    259  C   THR A  66       2.940  -3.204   6.152  1.00  0.43           C  
ATOM    260  O   THR A  66       2.735  -2.399   7.059  1.00  0.58           O  
ATOM    261  N   LEU A  67       2.439  -3.017   4.918  1.00  0.38           N  
ATOM    262  CA  LEU A  67       1.487  -1.978   4.677  1.00  0.38           C  
ATOM    263  C   LEU A  67       0.167  -2.655   4.816  1.00  0.37           C  
ATOM    264  O   LEU A  67      -0.104  -3.810   4.488  1.00  0.50           O  
ATOM    265  N   HIS A  68      -0.780  -1.857   5.339  1.00  0.35           N  
ATOM    266  CA  HIS A  68      -2.125  -2.308   5.521  1.00  0.37           C  
ATOM    267  C   HIS A  68      -2.988  -1.565   4.559  1.00  0.35           C  
ATOM    268  O   HIS A  68      -3.173  -0.357   4.694  1.00  0.48           O  
ATOM    269  N   LEU A  69      -3.640  -2.318   3.657  1.00  0.36           N  
ATOM    270  CA  LEU A  69      -4.561  -1.777   2.705  1.00  0.38           C  
ATOM    271  C   LEU A  69      -5.910  -1.689   3.331  1.00  0.41           C  
ATOM    272  O   LEU A  69      -6.476  -2.649   3.851  1.00  0.56           O  
ATOM    273  N   VAL A  70      -6.436  -0.456   3.434  1.00  0.45           N  
ATOM    274  CA  VAL A  70      -7.765  -0.135   3.854  1.00  0.56           C  
ATOM    275  C   VAL A  70      -8.501   0.393   2.671  1.00  0.55           C  
ATOM    276  O   VAL A  70      -8.095   1.289   1.933  1.00  0.58           O  
TER
ENDMDL
MODEL      12
ATOM      1  N   GLN A   2      11.460  -5.559  -1.429  1.00  0.59           N  
ATOM      2  CA  GLN A   2      10.282  -6.292  -1.085  1.00  0.56           C  
ATOM      3  C   GLN A   2       9.415  -5.826   0.033  1.00  0.50           C  
ATOM      4  O   GLN A   2       9.862  -5.912   1.176  1.00  0.60           O  
ATOM      5  N   ILE A   3       8.150  -5.408  -0.149  1.00  0.44           N  
ATOM      6  CA  ILE A   3       7.191  -5.055   0.852  1.00  0.42           C  
ATOM      7  C   ILE A   3       6.073  -6.040   0.851  1.00  0.40           C  
ATOM      8  O   ILE A   3       5.952  -6.868  -0.050  1.00  0.50           O  
ATOM      9  N   PHE A   4       5.281  -6.062   1.938  1.00  0.37           N  
ATOM     10  CA  PHE A   4       4.145  -6.926   2.043  1.00  0.38           C  
ATOM     11  C   PHE A   4       2.952  -6.057   2.248  1.00  0.39           C  
ATOM     12  O   PHE A   4       3.027  -5.106   3.023  1.00  0.60           O  
ATOM     13  N   VAL A   5       1.818  -6.260   1.554  1.00  0.35           N  
ATOM     14  CA  VAL A   5       0.626  -5.506   1.792  1.00  0.35           C  
ATOM     15  C   VAL A   5      -0.477  -6.415   2.214  1.00  0.35           C  
ATOM     16  O   VAL A   5      -0.819  -7.400   1.561  1.00  0.46           O  
ATOM     17  N   LYS A   6      -1.136  -6.034   3.323  1.00  0.36           N  
ATOM     18  CA  LYS A   6      -2.146  -6.722   4.066  1.00  0.39           C  
ATOM     19  C   LYS A   6      -3.456  -6.220   3.565  1.00  0.46           C  
ATOM     20  O   LYS A   6      -3.675  -5.032   3.793  1.00  0.53           O  
ATOM     21  N   THR A   7      -4.325  -7.089   3.016  1.00  0.58           N  
ATOM     22  CA  THR A   7      -5.625  -6.783   2.503  1.00  0.78           C  
ATOM     23  C   THR A   7      -6.598  -6.853   3.629  1.00  0.94           C  
ATOM     24  O   THR A   7      -6.129  -7.147   4.727  1.00  0.99           O  
ATOM     25  N   LEU A   8      -7.917  -6.730   3.391  1.00  1.17           N  
ATOM     26  CA  LEU A   8      -9.004  -6.902   4.303  1.00  1.39           C  
ATOM     27  C   LEU A   8      -9.390  -8.341   4.328  1.00  1.44           C  
ATOM     28  O   LEU A   8      -9.894  -8.836   5.335  1.00  1.60           O  
ATOM     29  N   THR A   9      -9.194  -9.077   3.220  1.00  1.41           N  
ATOM     30  CA  THR A   9      -9.636 -10.434   3.133  1.00  1.51           C  
ATOM     31  C   THR A   9      -8.819 -11.472   3.822  1.00  1.37           C  
ATOM     32  O   THR A   9      -9.181 -12.646   3.879  1.00  1.62           O  
ATOM     33  N   GLY A  10      -7.643 -11.070   4.337  1.00  1.18           N  
ATOM     34  CA  GLY A  10      -6.837 -11.955   5.119  1.00  1.22           C  
ATOM     35  C   GLY A  10      -5.634 -12.435   4.382  1.00  0.99           C  
ATOM     36  O   GLY A  10      -4.827 -13.248   4.831  1.00  1.31           O  
ATOM     37  N   LYS A  11      -5.412 -11.899   3.169  1.00  0.73           N  
ATOM     38  CA  LYS A  11      -4.350 -12.222   2.268  1.00  0.60           C  
ATOM     39  C   LYS A  11      -3.224 -11.257   2.417  1.00  0.51           C  
ATOM     40  O   LYS A  11      -3.405 -10.062   2.642  1.00  0.63           O  
ATOM     41  N   THR A  12      -1.980 -11.745   2.266  1.00  0.49           N  
ATOM     42  CA  THR A  12      -0.790 -10.951   2.233  1.00  0.48           C  
ATOM     43  C   THR A  12      -0.347 -10.933   0.811  1.00  0.52           C  
ATOM     44  O   THR A  12      -0.003 -11.995   0.295  1.00  0.72           O  
ATOM     45  N   ILE A  13      -0.336  -9.773   0.129  1.00  0.48           N  
ATOM     46  CA  ILE A  13       0.199  -9.656  -1.192  1.00  0.55           C  
ATOM     47  C   ILE A  13       1.634  -9.273  -1.065  1.00  0.51           C  
ATOM     48  O   ILE A  13       2.067  -8.305  -0.442  1.00  0.56           O  
ATOM     49  N   THR A  14       2.543 -10.035  -1.699  1.00  0.55           N  
ATOM     50  CA  THR A  14       3.935  -9.707  -1.691  1.00  0.54           C  
ATOM     51  C   THR A  14       4.318  -8.970  -2.927  1.00  0.55           C  
ATOM     52  O   THR A  14       4.233  -9.448  -4.057  1.00  0.72           O  
ATOM     53  N   LEU A  15       4.695  -7.691  -2.742  1.00  0.50           N  
ATOM     54  CA  LEU A  15       5.066  -6.876  -3.856  1.00  0.55           C  
ATOM     55  C   LEU A  15       6.457  -6.348  -3.790  1.00  0.52           C  
ATOM     56  O   LEU A  15       6.988  -6.164  -2.696  1.00  0.58           O  
ATOM     57  N   GLU A  16       7.085  -6.036  -4.940  1.00  0.59           N  
ATOM     58  CA  GLU A  16       8.358  -5.386  -4.928  1.00  0.63           C  
ATOM     59  C   GLU A  16       8.183  -3.987  -5.409  1.00  0.65           C  
ATOM     60  O   GLU A  16       7.401  -3.737  -6.325  1.00  0.81           O  
ATOM     61  N   VAL A  17       8.938  -3.008  -4.882  1.00  0.61           N  
ATOM     62  CA  VAL A  17       8.918  -1.629  -5.262  1.00  0.63           C  
ATOM     63  C   VAL A  17      10.257  -1.035  -4.991  1.00  0.65           C  
ATOM     64  O   VAL A  17      11.015  -1.630  -4.225  1.00  0.76           O  
ATOM     65  N   GLU A  18      10.668   0.057  -5.659  1.00  0.68           N  
ATOM     66  CA  GLU A  18      11.878   0.675  -5.214  1.00  0.74           C  
ATOM     67  C   GLU A  18      11.529   1.788  -4.287  1.00  0.71           C  
ATOM     68  O   GLU A  18      10.337   2.089  -4.282  1.00  0.74           O  
ATOM     69  N   PRO A  19      12.272   2.276  -3.339  1.00  0.74           N  
ATOM     70  CA  PRO A  19      11.755   3.249  -2.422  1.00  0.74           C  
ATOM     71  C   PRO A  19      11.617   4.595  -3.047  1.00  0.70           C  
ATOM     72  O   PRO A  19      10.965   5.452  -2.452  1.00  0.74           O  
ATOM     73  N   SER A  20      12.170   4.865  -4.243  1.00  0.70           N  
ATOM     74  CA  SER A  20      12.021   6.047  -5.034  1.00  0.74           C  
ATOM     75  C   SER A  20      10.734   6.075  -5.785  1.00  0.71           C  
ATOM     76  O   SER A  20      10.500   6.998  -6.565  1.00  0.80           O  
ATOM     77  N   ASP A  21       9.891   5.059  -5.528  1.00  0.70           N  
ATOM     78  CA  ASP A  21       8.554   4.909  -6.010  1.00  0.73           C  
ATOM     79  C   ASP A  21       7.484   5.424  -5.110  1.00  0.64           C  
ATOM     80  O   ASP A  21       7.551   5.407  -3.882  1.00  0.66           O  
ATOM     81  N   THR A  22       6.342   5.848  -5.679  1.00  0.63           N  
ATOM     82  CA  THR A  22       5.246   6.387  -4.934  1.00  0.58           C  
ATOM     83  C   THR A  22       4.322   5.392  -4.323  1.00  0.53           C  
ATOM     84  O   THR A  22       4.265   4.199  -4.621  1.00  0.58           O  
ATOM     85  N   ILE A  23       3.541   5.832  -3.321  1.00  0.51           N  
ATOM     86  CA  ILE A  23       2.469   5.056  -2.779  1.00  0.48           C  
ATOM     87  C   ILE A  23       1.390   4.698  -3.741  1.00  0.48           C  
ATOM     88  O   ILE A  23       0.834   3.601  -3.724  1.00  0.51           O  
ATOM     89  N   GLU A  24       1.121   5.631  -4.673  1.00  0.50           N  
ATOM     90  CA  GLU A  24       0.481   5.405  -5.932  1.00  0.53           C  
ATOM     91  C   GLU A  24       0.930   4.295  -6.817  1.00  0.50           C  
ATOM     92  O   GLU A  24       0.103   3.591  -7.395  1.00  0.55           O  
ATOM     93  N   ASN A  25       2.232   3.966  -6.903  1.00  0.51           N  
ATOM     94  CA  ASN A  25       2.689   2.845  -7.663  1.00  0.52           C  
ATOM     95  C   ASN A  25       2.166   1.535  -7.183  1.00  0.47           C  
ATOM     96  O   ASN A  25       1.912   0.650  -7.999  1.00  0.53           O  
ATOM     97  N   VAL A  26       1.973   1.430  -5.856  1.00  0.45           N  
ATOM     98  CA  VAL A  26       1.520   0.279  -5.137  1.00  0.44           C  
ATOM     99  C   VAL A  26       0.095  -0.051  -5.417  1.00  0.40           C  
ATOM    100  O   VAL A  26      -0.283  -1.193  -5.675  1.00  0.44           O  
ATOM    101  N   LYS A  27      -0.711   1.025  -5.481  1.00  0.40           N  
ATOM    102  CA  LYS A  27      -2.088   0.953  -5.859  1.00  0.41           C  
ATOM    103  C   LYS A  27      -2.263   0.575  -7.289  1.00  0.38           C  
ATOM    104  O   LYS A  27      -3.158  -0.206  -7.606  1.00  0.42           O  
ATOM    105  N   ALA A  28      -1.376   0.986  -8.214  1.00  0.39           N  
ATOM    106  CA  ALA A  28      -1.383   0.498  -9.558  1.00  0.39           C  
ATOM    107  C   ALA A  28      -1.111  -0.957  -9.721  1.00  0.36           C  
ATOM    108  O   ALA A  28      -1.846  -1.682 -10.389  1.00  0.42           O  
ATOM    109  N   LYS A  29      -0.146  -1.518  -8.969  1.00  0.39           N  
ATOM    110  CA  LYS A  29       0.048  -2.930  -8.852  1.00  0.43           C  
ATOM    111  C   LYS A  29      -1.100  -3.660  -8.244  1.00  0.44           C  
ATOM    112  O   LYS A  29      -1.484  -4.712  -8.752  1.00  0.54           O  
ATOM    113  N   ILE A  30      -1.811  -3.142  -7.227  1.00  0.41           N  
ATOM    114  CA  ILE A  30      -2.987  -3.767  -6.703  1.00  0.44           C  
ATOM    115  C   ILE A  30      -4.096  -3.886  -7.690  1.00  0.45           C  
ATOM    116  O   ILE A  30      -4.922  -4.795  -7.767  1.00  0.56           O  
ATOM    117  N   GLN A  31      -4.180  -2.849  -8.541  1.00  0.41           N  
ATOM    118  CA  GLN A  31      -5.098  -2.830  -9.637  1.00  0.48           C  
ATOM    119  C   GLN A  31      -4.827  -3.834 -10.705  1.00  0.52           C  
ATOM    120  O   GLN A  31      -5.803  -4.442 -11.140  1.00  0.66           O  
ATOM    121  N   ASP A  32      -3.555  -4.195 -10.950  1.00  0.50           N  
ATOM    122  CA  ASP A  32      -3.178  -5.269 -11.815  1.00  0.60           C  
ATOM    123  C   ASP A  32      -3.491  -6.554 -11.127  1.00  0.65           C  
ATOM    124  O   ASP A  32      -4.193  -7.387 -11.698  1.00  0.81           O  
ATOM    125  N   LYS A  33      -2.990  -6.745  -9.894  1.00  0.62           N  
ATOM    126  CA  LYS A  33      -3.117  -7.973  -9.173  1.00  0.73           C  
ATOM    127  C   LYS A  33      -4.512  -8.339  -8.797  1.00  0.69           C  
ATOM    128  O   LYS A  33      -4.913  -9.483  -9.005  1.00  0.83           O  
ATOM    129  N   GLU A  34      -5.309  -7.447  -8.182  1.00  0.63           N  
ATOM    130  CA  GLU A  34      -6.604  -7.707  -7.632  1.00  0.67           C  
ATOM    131  C   GLU A  34      -7.714  -7.107  -8.423  1.00  0.69           C  
ATOM    132  O   GLU A  34      -8.662  -7.816  -8.758  1.00  0.95           O  
ATOM    133  N   GLY A  35      -7.568  -5.812  -8.754  1.00  0.63           N  
ATOM    134  CA  GLY A  35      -8.544  -5.186  -9.591  1.00  0.68           C  
ATOM    135  C   GLY A  35      -9.202  -3.988  -8.998  1.00  0.76           C  
ATOM    136  O   GLY A  35     -10.312  -3.661  -9.413  1.00  1.12           O  
ATOM    137  N   ILE A  36      -8.582  -3.438  -7.938  1.00  0.70           N  
ATOM    138  CA  ILE A  36      -9.133  -2.362  -7.174  1.00  0.76           C  
ATOM    139  C   ILE A  36      -8.724  -1.055  -7.763  1.00  0.71           C  
ATOM    140  O   ILE A  36      -7.514  -0.901  -7.921  1.00  0.73           O  
ATOM    141  N   PRO A  37      -9.505  -0.053  -8.036  1.00  0.75           N  
ATOM    142  CA  PRO A  37      -8.972   1.173  -8.556  1.00  0.79           C  
ATOM    143  C   PRO A  37      -8.139   2.012  -7.649  1.00  0.75           C  
ATOM    144  O   PRO A  37      -8.287   1.898  -6.433  1.00  0.75           O  
ATOM    145  N   PRO A  38      -7.336   2.935  -8.090  1.00  0.81           N  
ATOM    146  CA  PRO A  38      -6.366   3.534  -7.221  1.00  0.85           C  
ATOM    147  C   PRO A  38      -6.905   4.682  -6.439  1.00  0.89           C  
ATOM    148  O   PRO A  38      -6.285   5.272  -5.556  1.00  0.99           O  
ATOM    149  N   ASP A  39      -8.179   5.070  -6.629  1.00  0.96           N  
ATOM    150  CA  ASP A  39      -8.879   6.094  -5.917  1.00  1.11           C  
ATOM    151  C   ASP A  39      -9.464   5.588  -4.643  1.00  1.00           C  
ATOM    152  O   ASP A  39      -9.521   6.322  -3.657  1.00  1.14           O  
ATOM    153  N   GLN A  40      -9.782   4.290  -4.500  1.00  0.87           N  
ATOM    154  CA  GLN A  40     -10.387   3.701  -3.346  1.00  0.84           C  
ATOM    155  C   GLN A  40      -9.362   3.364  -2.319  1.00  0.67           C  
ATOM    156  O   GLN A  40      -9.539   3.487  -1.108  1.00  0.80           O  
ATOM    157  N   GLN A  41      -8.159   2.960  -2.764  1.00  0.56           N  
ATOM    158  CA  GLN A  41      -7.131   2.517  -1.873  1.00  0.51           C  
ATOM    159  C   GLN A  41      -6.382   3.552  -1.107  1.00  0.49           C  
ATOM    160  O   GLN A  41      -5.786   4.393  -1.778  1.00  0.65           O  
ATOM    161  N   ARG A  42      -6.405   3.496   0.237  1.00  0.47           N  
ATOM    162  CA  ARG A  42      -5.522   4.257   1.066  1.00  0.55           C  
ATOM    163  C   ARG A  42      -4.474   3.310   1.544  1.00  0.46           C  
ATOM    164  O   ARG A  42      -4.651   2.097   1.452  1.00  0.52           O  
ATOM    165  N   LEU A  43      -3.321   3.732   2.090  1.00  0.46           N  
ATOM    166  CA  LEU A  43      -2.341   2.919   2.744  1.00  0.42           C  
ATOM    167  C   LEU A  43      -1.956   3.469   4.073  1.00  0.43           C  
ATOM    168  O   LEU A  43      -1.731   4.666   4.251  1.00  0.55           O  
ATOM    169  N   ILE A  44      -1.917   2.551   5.056  1.00  0.42           N  
ATOM    170  CA  ILE A  44      -1.521   2.814   6.405  1.00  0.46           C  
ATOM    171  C   ILE A  44      -0.423   1.884   6.792  1.00  0.42           C  
ATOM    172  O   ILE A  44      -0.358   0.666   6.633  1.00  0.53           O  
ATOM    173  N   PHE A  45       0.701   2.467   7.249  1.00  0.42           N  
ATOM    174  CA  PHE A  45       1.802   1.762   7.827  1.00  0.46           C  
ATOM    175  C   PHE A  45       2.096   2.408   9.136  1.00  0.68           C  
ATOM    176  O   PHE A  45       2.135   3.610   9.396  1.00  1.50           O  
ATOM    177  N   ALA A  46       2.394   1.523  10.104  1.00  0.81           N  
ATOM    178  CA  ALA A  46       2.720   1.774  11.474  1.00  0.96           C  
ATOM    179  C   ALA A  46       1.756   2.627  12.223  1.00  0.97           C  
ATOM    180  O   ALA A  46       2.145   3.259  13.204  1.00  1.21           O  
ATOM    181  N   GLY A  47       0.457   2.725  11.887  1.00  0.99           N  
ATOM    182  CA  GLY A  47      -0.538   3.554  12.493  1.00  1.10           C  
ATOM    183  C   GLY A  47      -0.518   4.923  11.907  1.00  1.03           C  
ATOM    184  O   GLY A  47      -1.125   5.763  12.569  1.00  1.30           O  
ATOM    185  N   LYS A  48       0.163   5.174  10.775  1.00  0.98           N  
ATOM    186  CA  LYS A  48       0.131   6.443  10.116  1.00  1.05           C  
ATOM    187  C   LYS A  48      -0.291   6.147   8.718  1.00  0.84           C  
ATOM    188  O   LYS A  48       0.181   5.205   8.085  1.00  0.81           O  
ATOM    189  N   GLN A  49      -1.307   6.877   8.222  1.00  0.84           N  
ATOM    190  CA  GLN A  49      -1.834   6.905   6.893  1.00  0.80           C  
ATOM    191  C   GLN A  49      -1.037   7.813   6.021  1.00  0.72           C  
ATOM    192  O   GLN A  49      -0.707   8.951   6.351  1.00  0.83           O  
ATOM    193  N   LEU A  50      -0.586   7.216   4.902  1.00  0.69           N  
ATOM    194  CA  LEU A  50       0.404   7.789   4.044  1.00  0.66           C  
ATOM    195  C   LEU A  50      -0.157   8.830   3.139  1.00  0.72           C  
ATOM    196  O   LEU A  50      -1.379   8.980   3.137  1.00  0.90           O  
ATOM    197  N   GLU A  51       0.638   9.695   2.484  1.00  0.70           N  
ATOM    198  CA  GLU A  51       0.202  10.659   1.522  1.00  0.76           C  
ATOM    199  C   GLU A  51       0.388  10.012   0.193  1.00  0.77           C  
ATOM    200  O   GLU A  51       1.152   9.059   0.043  1.00  1.23           O  
ATOM    201  N   ASP A  52      -0.405  10.420  -0.813  1.00  0.66           N  
ATOM    202  CA  ASP A  52      -0.450   9.642  -2.011  1.00  0.65           C  
ATOM    203  C   ASP A  52       0.720   9.911  -2.894  1.00  0.60           C  
ATOM    204  O   ASP A  52       1.420   8.965  -3.254  1.00  0.62           O  
ATOM    205  N   GLY A  53       1.016  11.189  -3.190  1.00  0.68           N  
ATOM    206  CA  GLY A  53       2.227  11.523  -3.873  1.00  0.73           C  
ATOM    207  C   GLY A  53       3.472  11.813  -3.109  1.00  0.72           C  
ATOM    208  O   GLY A  53       4.054  12.885  -3.271  1.00  0.97           O  
ATOM    209  N   ARG A  54       3.949  10.833  -2.322  1.00  0.64           N  
ATOM    210  CA  ARG A  54       5.263  10.813  -1.757  1.00  0.63           C  
ATOM    211  C   ARG A  54       5.837   9.502  -2.171  1.00  0.59           C  
ATOM    212  O   ARG A  54       5.173   8.594  -2.667  1.00  0.62           O  
ATOM    213  N   THR A  55       7.164   9.440  -1.960  1.00  0.63           N  
ATOM    214  CA  THR A  55       7.876   8.236  -2.257  1.00  0.61           C  
ATOM    215  C   THR A  55       7.987   7.552  -0.938  1.00  0.59           C  
ATOM    216  O   THR A  55       7.954   8.112   0.157  1.00  0.64           O  
ATOM    217  N   LEU A  56       8.277   6.244  -1.053  1.00  0.58           N  
ATOM    218  CA  LEU A  56       8.533   5.428   0.094  1.00  0.59           C  
ATOM    219  C   LEU A  56       9.738   5.790   0.891  1.00  0.64           C  
ATOM    220  O   LEU A  56       9.853   5.561   2.094  1.00  0.70           O  
ATOM    221  N   SER A  57      10.696   6.383   0.156  1.00  0.68           N  
ATOM    222  CA  SER A  57      11.943   6.918   0.608  1.00  0.75           C  
ATOM    223  C   SER A  57      11.677   7.992   1.605  1.00  0.76           C  
ATOM    224  O   SER A  57      12.369   8.077   2.619  1.00  0.84           O  
ATOM    225  N   ASP A  58      10.742   8.932   1.376  1.00  0.75           N  
ATOM    226  CA  ASP A  58      10.368   9.945   2.313  1.00  0.78           C  
ATOM    227  C   ASP A  58       9.926   9.471   3.655  1.00  0.77           C  
ATOM    228  O   ASP A  58      10.255  10.077   4.673  1.00  0.86           O  
ATOM    229  N   TYR A  59       9.292   8.287   3.733  1.00  0.72           N  
ATOM    230  CA  TYR A  59       8.896   7.619   4.933  1.00  0.73           C  
ATOM    231  C   TYR A  59       9.999   6.797   5.505  1.00  0.76           C  
ATOM    232  O   TYR A  59       9.967   6.349   6.650  1.00  0.89           O  
ATOM    233  N   ASN A  60      11.184   6.760   4.869  1.00  0.74           N  
ATOM    234  CA  ASN A  60      12.200   5.841   5.277  1.00  0.79           C  
ATOM    235  C   ASN A  60      11.758   4.428   5.443  1.00  0.75           C  
ATOM    236  O   ASN A  60      11.948   3.794   6.481  1.00  0.86           O  
ATOM    237  N   ILE A  61      11.086   3.929   4.392  1.00  0.67           N  
ATOM    238  CA  ILE A  61      10.435   2.659   4.297  1.00  0.65           C  
ATOM    239  C   ILE A  61      11.444   1.744   3.694  1.00  0.66           C  
ATOM    240  O   ILE A  61      12.046   2.006   2.654  1.00  0.75           O  
ATOM    241  N   GLN A  62      11.724   0.622   4.377  1.00  0.67           N  
ATOM    242  CA  GLN A  62      12.728  -0.367   4.132  1.00  0.70           C  
ATOM    243  C   GLN A  62      12.043  -1.571   3.580  1.00  0.62           C  
ATOM    244  O   GLN A  62      10.849  -1.553   3.292  1.00  0.64           O  
ATOM    245  N   LYS A  63      12.783  -2.670   3.348  1.00  0.64           N  
ATOM    246  CA  LYS A  63      12.265  -3.939   2.938  1.00  0.62           C  
ATOM    247  C   LYS A  63      11.551  -4.592   4.071  1.00  0.59           C  
ATOM    248  O   LYS A  63      11.864  -4.327   5.230  1.00  0.66           O  
ATOM    249  N   GLU A  64      10.678  -5.542   3.689  1.00  0.57           N  
ATOM    250  CA  GLU A  64       9.939  -6.417   4.545  1.00  0.58           C  
ATOM    251  C   GLU A  64       9.055  -5.685   5.496  1.00  0.56           C  
ATOM    252  O   GLU A  64       9.049  -5.922   6.703  1.00  0.70           O  
ATOM    253  N   SER A  65       8.285  -4.725   4.953  1.00  0.51           N  
ATOM    254  CA  SER A  65       7.516  -3.758   5.672  1.00  0.51           C  
ATOM    255  C   SER A  65       6.147  -4.233   5.326  1.00  0.43           C  
ATOM    256  O   SER A  65       5.821  -4.565   4.188  1.00  0.50           O  
ATOM    257  N   THR A  66       5.268  -4.242   6.344  1.00  0.45           N  
ATOM    258  CA  THR A  66       3.894  -4.634   6.281  1.00  0.45           C  
ATOM    259  C   THR A  66       3.023  -3.425   6.261  1.00  0.43           C  
ATOM    260  O   THR A  66       2.745  -2.789   7.276  1.00  0.58           O  
ATOM    261  N   LEU A  67       2.412  -3.149   5.095  1.00  0.38           N  
ATOM    262  CA  LEU A  67       1.521  -2.045   4.906  1.00  0.38           C  
ATOM    263  C   LEU A  67       0.085  -2.433   4.842  1.00  0.37           C  
ATOM    264  O   LEU A  67      -0.316  -3.475   4.323  1.00  0.50           O  
ATOM    265  N   HIS A  68      -0.846  -1.572   5.292  1.00  0.35           N  
ATOM    266  CA  HIS A  68      -2.227  -1.933   5.382  1.00  0.37           C  
ATOM    267  C   HIS A  68      -2.979  -1.336   4.243  1.00  0.35           C  
ATOM    268  O   HIS A  68      -2.962  -0.122   4.047  1.00  0.48           O  
ATOM    269  N   LEU A  69      -3.830  -2.085   3.520  1.00  0.36           N  
ATOM    270  CA  LEU A  69      -4.688  -1.640   2.466  1.00  0.38           C  
ATOM    271  C   LEU A  69      -6.017  -1.270   3.029  1.00  0.41           C  
ATOM    272  O   LEU A  69      -6.687  -2.086   3.661  1.00  0.56           O  
ATOM    273  N   VAL A  70      -6.493  -0.016   2.908  1.00  0.45           N  
ATOM    274  CA  VAL A  70      -7.746   0.509   3.351  1.00  0.56           C  
ATOM    275  C   VAL A  70      -8.585   0.720   2.137  1.00  0.55           C  
ATOM    276  O   VAL A  70      -8.142   1.258   1.124  1.00  0.58           O  
TER
ENDMDL
MODEL      13
ATOM      1  N   GLN A   2      11.315  -6.651  -1.567  1.00  0.59           N  
ATOM      2  CA  GLN A   2      10.018  -7.228  -1.392  1.00  0.56           C  
ATOM      3  C   GLN A   2       9.315  -6.544  -0.271  1.00  0.50           C  
ATOM      4  O   GLN A   2      10.046  -6.170   0.645  1.00  0.60           O  
ATOM      5  N   ILE A   3       7.980  -6.474  -0.414  1.00  0.44           N  
ATOM      6  CA  ILE A   3       7.164  -6.033   0.674  1.00  0.42           C  
ATOM      7  C   ILE A   3       5.912  -6.840   0.666  1.00  0.40           C  
ATOM      8  O   ILE A   3       5.609  -7.545  -0.296  1.00  0.50           O  
ATOM      9  N   PHE A   4       5.110  -6.754   1.743  1.00  0.37           N  
ATOM     10  CA  PHE A   4       3.798  -7.315   1.832  1.00  0.38           C  
ATOM     11  C   PHE A   4       2.713  -6.316   2.034  1.00  0.39           C  
ATOM     12  O   PHE A   4       3.004  -5.233   2.541  1.00  0.60           O  
ATOM     13  N   VAL A   5       1.451  -6.611   1.676  1.00  0.35           N  
ATOM     14  CA  VAL A   5       0.418  -5.639   1.860  1.00  0.35           C  
ATOM     15  C   VAL A   5      -0.661  -6.468   2.467  1.00  0.35           C  
ATOM     16  O   VAL A   5      -1.020  -7.527   1.952  1.00  0.46           O  
ATOM     17  N   LYS A   6      -1.229  -6.053   3.613  1.00  0.36           N  
ATOM     18  CA  LYS A   6      -2.205  -6.807   4.337  1.00  0.39           C  
ATOM     19  C   LYS A   6      -3.632  -6.432   4.135  1.00  0.46           C  
ATOM     20  O   LYS A   6      -4.091  -5.364   4.540  1.00  0.53           O  
ATOM     21  N   THR A   7      -4.378  -7.277   3.402  1.00  0.58           N  
ATOM     22  CA  THR A   7      -5.780  -7.141   3.147  1.00  0.78           C  
ATOM     23  C   THR A   7      -6.588  -7.101   4.399  1.00  0.94           C  
ATOM     24  O   THR A   7      -6.055  -7.374   5.473  1.00  0.99           O  
ATOM     25  N   LEU A   8      -7.859  -6.678   4.288  1.00  1.17           N  
ATOM     26  CA  LEU A   8      -8.904  -6.590   5.260  1.00  1.39           C  
ATOM     27  C   LEU A   8      -9.216  -7.930   5.831  1.00  1.44           C  
ATOM     28  O   LEU A   8      -9.059  -8.206   7.019  1.00  1.60           O  
ATOM     29  N   THR A   9      -9.531  -8.931   4.990  1.00  1.41           N  
ATOM     30  CA  THR A   9      -9.862 -10.216   5.521  1.00  1.51           C  
ATOM     31  C   THR A   9      -8.672 -10.991   5.971  1.00  1.37           C  
ATOM     32  O   THR A   9      -8.878 -12.068   6.529  1.00  1.62           O  
ATOM     33  N   GLY A  10      -7.416 -10.622   5.663  1.00  1.18           N  
ATOM     34  CA  GLY A  10      -6.249 -11.161   6.288  1.00  1.22           C  
ATOM     35  C   GLY A  10      -5.220 -11.630   5.318  1.00  0.99           C  
ATOM     36  O   GLY A  10      -4.146 -12.117   5.668  1.00  1.31           O  
ATOM     37  N   LYS A  11      -5.406 -11.490   3.993  1.00  0.73           N  
ATOM     38  CA  LYS A  11      -4.496 -12.014   3.022  1.00  0.60           C  
ATOM     39  C   LYS A  11      -3.253 -11.209   2.859  1.00  0.51           C  
ATOM     40  O   LYS A  11      -3.364  -9.987   2.935  1.00  0.63           O  
ATOM     41  N   THR A  12      -2.090 -11.846   2.634  1.00  0.49           N  
ATOM     42  CA  THR A  12      -0.892 -11.199   2.199  1.00  0.48           C  
ATOM     43  C   THR A  12      -0.832 -11.049   0.717  1.00  0.52           C  
ATOM     44  O   THR A  12      -0.835 -12.062   0.019  1.00  0.72           O  
ATOM     45  N   ILE A  13      -0.621  -9.801   0.263  1.00  0.48           N  
ATOM     46  CA  ILE A  13      -0.362  -9.437  -1.096  1.00  0.55           C  
ATOM     47  C   ILE A  13       1.113  -9.240  -1.168  1.00  0.51           C  
ATOM     48  O   ILE A  13       1.639  -8.296  -0.581  1.00  0.56           O  
ATOM     49  N   THR A  14       1.855 -10.092  -1.898  1.00  0.55           N  
ATOM     50  CA  THR A  14       3.262  -9.840  -1.918  1.00  0.54           C  
ATOM     51  C   THR A  14       3.556  -8.890  -3.028  1.00  0.55           C  
ATOM     52  O   THR A  14       2.896  -8.993  -4.061  1.00  0.72           O  
ATOM     53  N   LEU A  15       4.534  -7.976  -2.901  1.00  0.50           N  
ATOM     54  CA  LEU A  15       4.879  -7.121  -3.995  1.00  0.55           C  
ATOM     55  C   LEU A  15       6.357  -6.942  -4.033  1.00  0.52           C  
ATOM     56  O   LEU A  15       7.050  -7.428  -3.140  1.00  0.58           O  
ATOM     57  N   GLU A  16       6.855  -6.247  -5.072  1.00  0.59           N  
ATOM     58  CA  GLU A  16       8.181  -5.728  -5.195  1.00  0.63           C  
ATOM     59  C   GLU A  16       8.139  -4.269  -5.496  1.00  0.65           C  
ATOM     60  O   GLU A  16       7.580  -3.811  -6.492  1.00  0.81           O  
ATOM     61  N   VAL A  17       8.728  -3.449  -4.607  1.00  0.61           N  
ATOM     62  CA  VAL A  17       8.799  -2.023  -4.684  1.00  0.63           C  
ATOM     63  C   VAL A  17      10.217  -1.566  -4.693  1.00  0.65           C  
ATOM     64  O   VAL A  17      11.027  -2.291  -4.119  1.00  0.76           O  
ATOM     65  N   GLU A  18      10.659  -0.420  -5.242  1.00  0.68           N  
ATOM     66  CA  GLU A  18      11.876   0.165  -4.772  1.00  0.74           C  
ATOM     67  C   GLU A  18      11.599   1.311  -3.858  1.00  0.71           C  
ATOM     68  O   GLU A  18      10.427   1.658  -3.722  1.00  0.74           O  
ATOM     69  N   PRO A  19      12.563   1.938  -3.252  1.00  0.74           N  
ATOM     70  CA  PRO A  19      12.208   3.012  -2.371  1.00  0.74           C  
ATOM     71  C   PRO A  19      11.806   4.210  -3.160  1.00  0.70           C  
ATOM     72  O   PRO A  19      11.083   5.061  -2.643  1.00  0.74           O  
ATOM     73  N   SER A  20      12.231   4.242  -4.436  1.00  0.70           N  
ATOM     74  CA  SER A  20      11.886   5.293  -5.342  1.00  0.74           C  
ATOM     75  C   SER A  20      10.527   5.345  -5.952  1.00  0.71           C  
ATOM     76  O   SER A  20      10.031   6.330  -6.495  1.00  0.80           O  
ATOM     77  N   ASP A  21       9.720   4.285  -5.766  1.00  0.70           N  
ATOM     78  CA  ASP A  21       8.371   4.163  -6.222  1.00  0.73           C  
ATOM     79  C   ASP A  21       7.448   4.881  -5.297  1.00  0.64           C  
ATOM     80  O   ASP A  21       7.613   4.876  -4.079  1.00  0.66           O  
ATOM     81  N   THR A  22       6.423   5.515  -5.894  1.00  0.63           N  
ATOM     82  CA  THR A  22       5.503   6.303  -5.132  1.00  0.58           C  
ATOM     83  C   THR A  22       4.441   5.463  -4.511  1.00  0.53           C  
ATOM     84  O   THR A  22       4.370   4.244  -4.662  1.00  0.58           O  
ATOM     85  N   ILE A  23       3.486   6.034  -3.756  1.00  0.51           N  
ATOM     86  CA  ILE A  23       2.395   5.346  -3.138  1.00  0.48           C  
ATOM     87  C   ILE A  23       1.303   5.162  -4.136  1.00  0.48           C  
ATOM     88  O   ILE A  23       0.642   4.125  -4.119  1.00  0.51           O  
ATOM     89  N   GLU A  24       1.098   6.054  -5.121  1.00  0.50           N  
ATOM     90  CA  GLU A  24       0.219   5.861  -6.233  1.00  0.53           C  
ATOM     91  C   GLU A  24       0.582   4.743  -7.148  1.00  0.50           C  
ATOM     92  O   GLU A  24      -0.276   4.045  -7.686  1.00  0.55           O  
ATOM     93  N   ASN A  25       1.898   4.470  -7.204  1.00  0.51           N  
ATOM     94  CA  ASN A  25       2.498   3.356  -7.871  1.00  0.52           C  
ATOM     95  C   ASN A  25       2.161   2.044  -7.252  1.00  0.47           C  
ATOM     96  O   ASN A  25       1.774   1.091  -7.927  1.00  0.53           O  
ATOM     97  N   VAL A  26       2.238   1.912  -5.916  1.00  0.45           N  
ATOM     98  CA  VAL A  26       1.882   0.755  -5.154  1.00  0.44           C  
ATOM     99  C   VAL A  26       0.429   0.476  -5.321  1.00  0.40           C  
ATOM    100  O   VAL A  26       0.042  -0.657  -5.605  1.00  0.44           O  
ATOM    101  N   LYS A  27      -0.402   1.534  -5.294  1.00  0.40           N  
ATOM    102  CA  LYS A  27      -1.757   1.293  -5.681  1.00  0.41           C  
ATOM    103  C   LYS A  27      -2.043   1.031  -7.120  1.00  0.38           C  
ATOM    104  O   LYS A  27      -3.109   0.495  -7.421  1.00  0.42           O  
ATOM    105  N   ALA A  28      -1.026   1.210  -7.981  1.00  0.39           N  
ATOM    106  CA  ALA A  28      -1.105   0.781  -9.342  1.00  0.39           C  
ATOM    107  C   ALA A  28      -0.756  -0.657  -9.516  1.00  0.36           C  
ATOM    108  O   ALA A  28      -1.444  -1.425 -10.186  1.00  0.42           O  
ATOM    109  N   LYS A  29       0.273  -1.095  -8.768  1.00  0.39           N  
ATOM    110  CA  LYS A  29       0.733  -2.445  -8.668  1.00  0.43           C  
ATOM    111  C   LYS A  29      -0.345  -3.346  -8.169  1.00  0.44           C  
ATOM    112  O   LYS A  29      -0.474  -4.465  -8.661  1.00  0.54           O  
ATOM    113  N   ILE A  30      -1.135  -2.896  -7.178  1.00  0.41           N  
ATOM    114  CA  ILE A  30      -2.311  -3.594  -6.759  1.00  0.44           C  
ATOM    115  C   ILE A  30      -3.481  -3.493  -7.677  1.00  0.45           C  
ATOM    116  O   ILE A  30      -4.315  -4.393  -7.760  1.00  0.56           O  
ATOM    117  N   GLN A  31      -3.587  -2.417  -8.476  1.00  0.41           N  
ATOM    118  CA  GLN A  31      -4.550  -2.443  -9.534  1.00  0.48           C  
ATOM    119  C   GLN A  31      -4.297  -3.511 -10.541  1.00  0.52           C  
ATOM    120  O   GLN A  31      -5.221  -4.195 -10.979  1.00  0.66           O  
ATOM    121  N   ASP A  32      -3.014  -3.738 -10.878  1.00  0.50           N  
ATOM    122  CA  ASP A  32      -2.561  -4.895 -11.587  1.00  0.60           C  
ATOM    123  C   ASP A  32      -2.897  -6.213 -10.981  1.00  0.65           C  
ATOM    124  O   ASP A  32      -3.387  -7.119 -11.653  1.00  0.81           O  
ATOM    125  N   LYS A  33      -2.640  -6.331  -9.666  1.00  0.62           N  
ATOM    126  CA  LYS A  33      -2.674  -7.644  -9.103  1.00  0.73           C  
ATOM    127  C   LYS A  33      -3.996  -8.089  -8.578  1.00  0.69           C  
ATOM    128  O   LYS A  33      -4.463  -9.179  -8.902  1.00  0.83           O  
ATOM    129  N   GLU A  34      -4.612  -7.253  -7.724  1.00  0.63           N  
ATOM    130  CA  GLU A  34      -5.796  -7.640  -7.021  1.00  0.67           C  
ATOM    131  C   GLU A  34      -6.937  -7.061  -7.786  1.00  0.69           C  
ATOM    132  O   GLU A  34      -7.932  -7.755  -7.984  1.00  0.95           O  
ATOM    133  N   GLY A  35      -6.854  -5.832  -8.324  1.00  0.63           N  
ATOM    134  CA  GLY A  35      -7.865  -5.273  -9.166  1.00  0.68           C  
ATOM    135  C   GLY A  35      -8.638  -4.072  -8.741  1.00  0.76           C  
ATOM    136  O   GLY A  35      -9.700  -3.897  -9.336  1.00  1.12           O  
ATOM    137  N   ILE A  36      -8.160  -3.294  -7.755  1.00  0.70           N  
ATOM    138  CA  ILE A  36      -8.716  -2.282  -6.911  1.00  0.76           C  
ATOM    139  C   ILE A  36      -8.258  -0.954  -7.406  1.00  0.71           C  
ATOM    140  O   ILE A  36      -7.073  -0.633  -7.485  1.00  0.73           O  
ATOM    141  N   PRO A  37      -9.162  -0.093  -7.765  1.00  0.75           N  
ATOM    142  CA  PRO A  37      -8.909   1.226  -8.271  1.00  0.79           C  
ATOM    143  C   PRO A  37      -8.111   2.136  -7.402  1.00  0.75           C  
ATOM    144  O   PRO A  37      -8.466   2.022  -6.230  1.00  0.75           O  
ATOM    145  N   PRO A  38      -7.151   2.939  -7.753  1.00  0.81           N  
ATOM    146  CA  PRO A  38      -6.354   3.638  -6.788  1.00  0.85           C  
ATOM    147  C   PRO A  38      -6.963   4.704  -5.944  1.00  0.89           C  
ATOM    148  O   PRO A  38      -6.394   5.185  -4.964  1.00  0.99           O  
ATOM    149  N   ASP A  39      -8.181   5.142  -6.309  1.00  0.96           N  
ATOM    150  CA  ASP A  39      -8.999   6.077  -5.601  1.00  1.11           C  
ATOM    151  C   ASP A  39      -9.700   5.457  -4.441  1.00  1.00           C  
ATOM    152  O   ASP A  39     -10.095   6.116  -3.481  1.00  1.14           O  
ATOM    153  N   GLN A  40      -9.765   4.114  -4.392  1.00  0.87           N  
ATOM    154  CA  GLN A  40     -10.421   3.394  -3.345  1.00  0.84           C  
ATOM    155  C   GLN A  40      -9.466   3.052  -2.253  1.00  0.67           C  
ATOM    156  O   GLN A  40      -9.866   2.984  -1.092  1.00  0.80           O  
ATOM    157  N   GLN A  41      -8.201   2.705  -2.551  1.00  0.56           N  
ATOM    158  CA  GLN A  41      -7.206   2.184  -1.666  1.00  0.51           C  
ATOM    159  C   GLN A  41      -6.739   3.205  -0.686  1.00  0.49           C  
ATOM    160  O   GLN A  41      -6.227   4.267  -1.035  1.00  0.65           O  
ATOM    161  N   ARG A  42      -6.783   2.868   0.616  1.00  0.47           N  
ATOM    162  CA  ARG A  42      -5.947   3.571   1.537  1.00  0.55           C  
ATOM    163  C   ARG A  42      -4.773   2.741   1.932  1.00  0.46           C  
ATOM    164  O   ARG A  42      -4.928   1.624   2.426  1.00  0.52           O  
ATOM    165  N   LEU A  43      -3.522   3.219   1.814  1.00  0.46           N  
ATOM    166  CA  LEU A  43      -2.345   2.539   2.255  1.00  0.42           C  
ATOM    167  C   LEU A  43      -1.907   3.222   3.504  1.00  0.43           C  
ATOM    168  O   LEU A  43      -1.556   4.401   3.532  1.00  0.55           O  
ATOM    169  N   ILE A  44      -1.904   2.443   4.601  1.00  0.42           N  
ATOM    170  CA  ILE A  44      -1.643   2.860   5.944  1.00  0.46           C  
ATOM    171  C   ILE A  44      -0.355   2.215   6.327  1.00  0.42           C  
ATOM    172  O   ILE A  44      -0.125   1.069   5.950  1.00  0.53           O  
ATOM    173  N   PHE A  45       0.474   2.967   7.073  1.00  0.42           N  
ATOM    174  CA  PHE A  45       1.605   2.320   7.662  1.00  0.46           C  
ATOM    175  C   PHE A  45       1.975   3.122   8.862  1.00  0.68           C  
ATOM    176  O   PHE A  45       2.111   4.340   8.764  1.00  1.50           O  
ATOM    177  N   ALA A  46       2.005   2.398   9.996  1.00  0.81           N  
ATOM    178  CA  ALA A  46       2.330   2.898  11.295  1.00  0.96           C  
ATOM    179  C   ALA A  46       1.265   3.821  11.777  1.00  0.97           C  
ATOM    180  O   ALA A  46       1.546   4.853  12.385  1.00  1.21           O  
ATOM    181  N   GLY A  47       0.004   3.474  11.464  1.00  0.99           N  
ATOM    182  CA  GLY A  47      -1.048   4.377  11.814  1.00  1.10           C  
ATOM    183  C   GLY A  47      -1.267   5.521  10.885  1.00  1.03           C  
ATOM    184  O   GLY A  47      -2.351   6.101  10.865  1.00  1.30           O  
ATOM    185  N   LYS A  48      -0.256   5.933  10.098  1.00  0.98           N  
ATOM    186  CA  LYS A  48      -0.348   7.033   9.189  1.00  1.05           C  
ATOM    187  C   LYS A  48      -0.866   6.685   7.836  1.00  0.84           C  
ATOM    188  O   LYS A  48      -0.439   5.693   7.247  1.00  0.81           O  
ATOM    189  N   GLN A  49      -1.686   7.518   7.172  1.00  0.84           N  
ATOM    190  CA  GLN A  49      -2.079   7.301   5.814  1.00  0.80           C  
ATOM    191  C   GLN A  49      -1.060   7.909   4.915  1.00  0.72           C  
ATOM    192  O   GLN A  49      -0.519   8.986   5.161  1.00  0.83           O  
ATOM    193  N   LEU A  50      -0.667   7.162   3.867  1.00  0.69           N  
ATOM    194  CA  LEU A  50       0.375   7.576   2.979  1.00  0.66           C  
ATOM    195  C   LEU A  50      -0.145   8.307   1.790  1.00  0.72           C  
ATOM    196  O   LEU A  50      -1.117   7.855   1.185  1.00  0.90           O  
ATOM    197  N   GLU A  51       0.402   9.498   1.492  1.00  0.70           N  
ATOM    198  CA  GLU A  51       0.027  10.393   0.440  1.00  0.76           C  
ATOM    199  C   GLU A  51       0.603  10.149  -0.912  1.00  0.77           C  
ATOM    200  O   GLU A  51       1.794   9.874  -1.050  1.00  1.23           O  
ATOM    201  N   ASP A  52      -0.210  10.149  -1.983  1.00  0.66           N  
ATOM    202  CA  ASP A  52       0.012   9.677  -3.316  1.00  0.65           C  
ATOM    203  C   ASP A  52       1.313   9.897  -4.006  1.00  0.60           C  
ATOM    204  O   ASP A  52       2.018   8.934  -4.301  1.00  0.62           O  
ATOM    205  N   GLY A  53       1.626  11.166  -4.329  1.00  0.68           N  
ATOM    206  CA  GLY A  53       2.915  11.526  -4.829  1.00  0.73           C  
ATOM    207  C   GLY A  53       4.007  11.763  -3.843  1.00  0.72           C  
ATOM    208  O   GLY A  53       4.587  12.847  -3.841  1.00  0.97           O  
ATOM    209  N   ARG A  54       4.317  10.756  -3.007  1.00  0.64           N  
ATOM    210  CA  ARG A  54       5.465  10.702  -2.154  1.00  0.63           C  
ATOM    211  C   ARG A  54       6.063   9.372  -2.457  1.00  0.59           C  
ATOM    212  O   ARG A  54       5.364   8.458  -2.892  1.00  0.62           O  
ATOM    213  N   THR A  55       7.364   9.155  -2.192  1.00  0.63           N  
ATOM    214  CA  THR A  55       7.934   7.859  -2.396  1.00  0.61           C  
ATOM    215  C   THR A  55       8.045   7.053  -1.148  1.00  0.59           C  
ATOM    216  O   THR A  55       7.889   7.581  -0.048  1.00  0.64           O  
ATOM    217  N   LEU A  56       8.323   5.740  -1.230  1.00  0.58           N  
ATOM    218  CA  LEU A  56       8.509   4.930  -0.066  1.00  0.59           C  
ATOM    219  C   LEU A  56       9.705   5.264   0.758  1.00  0.64           C  
ATOM    220  O   LEU A  56       9.669   5.158   1.983  1.00  0.70           O  
ATOM    221  N   SER A  57      10.701   5.873   0.089  1.00  0.68           N  
ATOM    222  CA  SER A  57      11.924   6.364   0.643  1.00  0.75           C  
ATOM    223  C   SER A  57      11.645   7.548   1.502  1.00  0.76           C  
ATOM    224  O   SER A  57      12.178   7.635   2.608  1.00  0.84           O  
ATOM    225  N   ASP A  58      10.729   8.448   1.103  1.00  0.75           N  
ATOM    226  CA  ASP A  58      10.267   9.522   1.926  1.00  0.78           C  
ATOM    227  C   ASP A  58       9.716   9.122   3.250  1.00  0.77           C  
ATOM    228  O   ASP A  58      10.067   9.793   4.220  1.00  0.86           O  
ATOM    229  N   TYR A  59       8.948   8.021   3.342  1.00  0.72           N  
ATOM    230  CA  TYR A  59       8.320   7.530   4.529  1.00  0.73           C  
ATOM    231  C   TYR A  59       9.183   6.601   5.311  1.00  0.76           C  
ATOM    232  O   TYR A  59       8.742   6.083   6.335  1.00  0.89           O  
ATOM    233  N   ASN A  60      10.393   6.314   4.797  1.00  0.74           N  
ATOM    234  CA  ASN A  60      11.325   5.392   5.368  1.00  0.79           C  
ATOM    235  C   ASN A  60      10.729   4.030   5.470  1.00  0.75           C  
ATOM    236  O   ASN A  60      10.842   3.320   6.467  1.00  0.86           O  
ATOM    237  N   ILE A  61      10.157   3.521   4.364  1.00  0.67           N  
ATOM    238  CA  ILE A  61       9.590   2.209   4.347  1.00  0.65           C  
ATOM    239  C   ILE A  61      10.717   1.287   4.035  1.00  0.66           C  
ATOM    240  O   ILE A  61      11.481   1.386   3.075  1.00  0.75           O  
ATOM    241  N   GLN A  62      10.894   0.268   4.896  1.00  0.67           N  
ATOM    242  CA  GLN A  62      11.984  -0.648   4.767  1.00  0.70           C  
ATOM    243  C   GLN A  62      11.653  -1.854   3.958  1.00  0.62           C  
ATOM    244  O   GLN A  62      10.496  -2.038   3.581  1.00  0.64           O  
ATOM    245  N   LYS A  63      12.628  -2.732   3.666  1.00  0.64           N  
ATOM    246  CA  LYS A  63      12.342  -3.974   3.018  1.00  0.62           C  
ATOM    247  C   LYS A  63      11.610  -4.944   3.881  1.00  0.59           C  
ATOM    248  O   LYS A  63      11.793  -5.037   5.094  1.00  0.66           O  
ATOM    249  N   GLU A  64      10.735  -5.774   3.285  1.00  0.57           N  
ATOM    250  CA  GLU A  64      10.014  -6.765   4.024  1.00  0.58           C  
ATOM    251  C   GLU A  64       9.110  -6.221   5.076  1.00  0.56           C  
ATOM    252  O   GLU A  64       9.068  -6.746   6.187  1.00  0.70           O  
ATOM    253  N   SER A  65       8.510  -5.059   4.764  1.00  0.51           N  
ATOM    254  CA  SER A  65       7.630  -4.345   5.638  1.00  0.51           C  
ATOM    255  C   SER A  65       6.212  -4.554   5.235  1.00  0.43           C  
ATOM    256  O   SER A  65       5.938  -4.738   4.049  1.00  0.50           O  
ATOM    257  N   THR A  66       5.255  -4.531   6.180  1.00  0.45           N  
ATOM    258  CA  THR A  66       3.852  -4.753   6.019  1.00  0.45           C  
ATOM    259  C   THR A  66       3.072  -3.489   5.896  1.00  0.43           C  
ATOM    260  O   THR A  66       2.891  -2.864   6.940  1.00  0.58           O  
ATOM    261  N   LEU A  67       2.504  -3.169   4.720  1.00  0.38           N  
ATOM    262  CA  LEU A  67       1.591  -2.068   4.691  1.00  0.38           C  
ATOM    263  C   LEU A  67       0.205  -2.549   4.955  1.00  0.37           C  
ATOM    264  O   LEU A  67      -0.089  -3.707   4.657  1.00  0.50           O  
ATOM    265  N   HIS A  68      -0.659  -1.676   5.502  1.00  0.35           N  
ATOM    266  CA  HIS A  68      -2.026  -2.018   5.746  1.00  0.37           C  
ATOM    267  C   HIS A  68      -2.955  -1.408   4.753  1.00  0.35           C  
ATOM    268  O   HIS A  68      -3.039  -0.195   4.568  1.00  0.48           O  
ATOM    269  N   LEU A  69      -3.789  -2.176   4.031  1.00  0.36           N  
ATOM    270  CA  LEU A  69      -4.737  -1.722   3.061  1.00  0.38           C  
ATOM    271  C   LEU A  69      -6.056  -1.564   3.735  1.00  0.41           C  
ATOM    272  O   LEU A  69      -6.588  -2.538   4.266  1.00  0.56           O  
ATOM    273  N   VAL A  70      -6.693  -0.390   3.573  1.00  0.45           N  
ATOM    274  CA  VAL A  70      -8.022  -0.076   3.997  1.00  0.56           C  
ATOM    275  C   VAL A  70      -8.685   0.291   2.713  1.00  0.55           C  
ATOM    276  O   VAL A  70      -8.028   0.674   1.746  1.00  0.58           O  
TER
ENDMDL
MODEL      14
ATOM      1  N   GLN A   2      10.909  -6.519  -1.712  1.00  0.59           N  
ATOM      2  CA  GLN A   2       9.582  -7.011  -1.510  1.00  0.56           C  
ATOM      3  C   GLN A   2       8.977  -6.440  -0.273  1.00  0.50           C  
ATOM      4  O   GLN A   2       9.612  -6.353   0.777  1.00  0.60           O  
ATOM      5  N   ILE A   3       7.777  -5.860  -0.456  1.00  0.44           N  
ATOM      6  CA  ILE A   3       6.981  -5.370   0.625  1.00  0.42           C  
ATOM      7  C   ILE A   3       5.758  -6.221   0.642  1.00  0.40           C  
ATOM      8  O   ILE A   3       5.387  -6.884  -0.325  1.00  0.50           O  
ATOM      9  N   PHE A   4       5.014  -6.164   1.762  1.00  0.37           N  
ATOM     10  CA  PHE A   4       3.860  -6.960   2.045  1.00  0.38           C  
ATOM     11  C   PHE A   4       2.744  -5.987   2.213  1.00  0.39           C  
ATOM     12  O   PHE A   4       2.876  -4.917   2.806  1.00  0.60           O  
ATOM     13  N   VAL A   5       1.582  -6.278   1.601  1.00  0.35           N  
ATOM     14  CA  VAL A   5       0.431  -5.442   1.745  1.00  0.35           C  
ATOM     15  C   VAL A   5      -0.558  -6.344   2.399  1.00  0.35           C  
ATOM     16  O   VAL A   5      -0.884  -7.371   1.804  1.00  0.46           O  
ATOM     17  N   LYS A   6      -1.121  -6.168   3.607  1.00  0.36           N  
ATOM     18  CA  LYS A   6      -2.131  -7.033   4.131  1.00  0.39           C  
ATOM     19  C   LYS A   6      -3.423  -6.288   4.131  1.00  0.46           C  
ATOM     20  O   LYS A   6      -3.472  -5.110   4.482  1.00  0.53           O  
ATOM     21  N   THR A   7      -4.507  -6.953   3.693  1.00  0.58           N  
ATOM     22  CA  THR A   7      -5.846  -6.450   3.682  1.00  0.78           C  
ATOM     23  C   THR A   7      -6.627  -6.661   4.933  1.00  0.94           C  
ATOM     24  O   THR A   7      -6.191  -7.178   5.961  1.00  0.99           O  
ATOM     25  N   LEU A   8      -7.896  -6.223   4.838  1.00  1.17           N  
ATOM     26  CA  LEU A   8      -8.813  -6.337   5.928  1.00  1.39           C  
ATOM     27  C   LEU A   8      -9.297  -7.720   6.195  1.00  1.44           C  
ATOM     28  O   LEU A   8      -9.561  -8.167   7.310  1.00  1.60           O  
ATOM     29  N   THR A   9      -9.410  -8.612   5.194  1.00  1.41           N  
ATOM     30  CA  THR A   9      -9.810  -9.969   5.402  1.00  1.51           C  
ATOM     31  C   THR A   9      -8.675 -10.772   5.936  1.00  1.37           C  
ATOM     32  O   THR A   9      -8.695 -11.445   6.966  1.00  1.62           O  
ATOM     33  N   GLY A  10      -7.522 -10.681   5.250  1.00  1.18           N  
ATOM     34  CA  GLY A  10      -6.304 -11.284   5.694  1.00  1.22           C  
ATOM     35  C   GLY A  10      -5.499 -11.809   4.554  1.00  0.99           C  
ATOM     36  O   GLY A  10      -4.891 -12.872   4.667  1.00  1.31           O  
ATOM     37  N   LYS A  11      -5.523 -11.107   3.407  1.00  0.73           N  
ATOM     38  CA  LYS A  11      -4.971 -11.585   2.177  1.00  0.60           C  
ATOM     39  C   LYS A  11      -3.671 -10.870   2.036  1.00  0.51           C  
ATOM     40  O   LYS A  11      -3.724  -9.656   1.840  1.00  0.63           O  
ATOM     41  N   THR A  12      -2.504 -11.517   2.194  1.00  0.49           N  
ATOM     42  CA  THR A  12      -1.176 -10.992   2.113  1.00  0.48           C  
ATOM     43  C   THR A  12      -0.808 -10.980   0.670  1.00  0.52           C  
ATOM     44  O   THR A  12      -0.720 -12.032   0.037  1.00  0.72           O  
ATOM     45  N   ILE A  13      -0.611  -9.773   0.111  1.00  0.48           N  
ATOM     46  CA  ILE A  13      -0.184  -9.611  -1.244  1.00  0.55           C  
ATOM     47  C   ILE A  13       1.262  -9.314  -1.040  1.00  0.51           C  
ATOM     48  O   ILE A  13       1.635  -8.670  -0.061  1.00  0.56           O  
ATOM     49  N   THR A  14       2.140  -9.749  -1.962  1.00  0.55           N  
ATOM     50  CA  THR A  14       3.535  -9.436  -1.941  1.00  0.54           C  
ATOM     51  C   THR A  14       3.751  -8.684  -3.209  1.00  0.55           C  
ATOM     52  O   THR A  14       3.313  -8.996  -4.315  1.00  0.72           O  
ATOM     53  N   LEU A  15       4.424  -7.533  -3.036  1.00  0.50           N  
ATOM     54  CA  LEU A  15       4.677  -6.669  -4.146  1.00  0.55           C  
ATOM     55  C   LEU A  15       6.143  -6.407  -4.210  1.00  0.52           C  
ATOM     56  O   LEU A  15       6.765  -6.308  -3.153  1.00  0.58           O  
ATOM     57  N   GLU A  16       6.746  -6.374  -5.412  1.00  0.59           N  
ATOM     58  CA  GLU A  16       8.099  -5.935  -5.566  1.00  0.63           C  
ATOM     59  C   GLU A  16       8.161  -4.554  -6.121  1.00  0.65           C  
ATOM     60  O   GLU A  16       7.555  -4.191  -7.127  1.00  0.81           O  
ATOM     61  N   VAL A  17       8.957  -3.722  -5.426  1.00  0.61           N  
ATOM     62  CA  VAL A  17       9.027  -2.304  -5.600  1.00  0.63           C  
ATOM     63  C   VAL A  17      10.442  -1.840  -5.571  1.00  0.65           C  
ATOM     64  O   VAL A  17      11.347  -2.549  -5.133  1.00  0.76           O  
ATOM     65  N   GLU A  18      10.728  -0.595  -5.993  1.00  0.68           N  
ATOM     66  CA  GLU A  18      11.949   0.071  -5.661  1.00  0.74           C  
ATOM     67  C   GLU A  18      11.687   1.115  -4.631  1.00  0.71           C  
ATOM     68  O   GLU A  18      10.535   1.505  -4.451  1.00  0.74           O  
ATOM     69  N   PRO A  19      12.683   1.669  -4.005  1.00  0.74           N  
ATOM     70  CA  PRO A  19      12.339   2.656  -3.023  1.00  0.74           C  
ATOM     71  C   PRO A  19      11.806   3.972  -3.477  1.00  0.70           C  
ATOM     72  O   PRO A  19      11.160   4.700  -2.726  1.00  0.74           O  
ATOM     73  N   SER A  20      11.939   4.243  -4.787  1.00  0.70           N  
ATOM     74  CA  SER A  20      11.514   5.433  -5.457  1.00  0.74           C  
ATOM     75  C   SER A  20      10.152   5.379  -6.058  1.00  0.71           C  
ATOM     76  O   SER A  20       9.685   6.378  -6.604  1.00  0.80           O  
ATOM     77  N   ASP A  21       9.392   4.285  -5.867  1.00  0.70           N  
ATOM     78  CA  ASP A  21       8.012   4.264  -6.238  1.00  0.73           C  
ATOM     79  C   ASP A  21       7.152   4.930  -5.220  1.00  0.64           C  
ATOM     80  O   ASP A  21       7.263   4.838  -3.998  1.00  0.66           O  
ATOM     81  N   THR A  22       6.108   5.609  -5.728  1.00  0.63           N  
ATOM     82  CA  THR A  22       5.079   6.309  -5.025  1.00  0.58           C  
ATOM     83  C   THR A  22       4.075   5.311  -4.559  1.00  0.53           C  
ATOM     84  O   THR A  22       3.969   4.245  -5.161  1.00  0.58           O  
ATOM     85  N   ILE A  23       3.292   5.684  -3.531  1.00  0.51           N  
ATOM     86  CA  ILE A  23       2.241   4.948  -2.899  1.00  0.48           C  
ATOM     87  C   ILE A  23       1.224   4.818  -3.981  1.00  0.48           C  
ATOM     88  O   ILE A  23       0.635   3.750  -4.139  1.00  0.51           O  
ATOM     89  N   GLU A  24       0.982   5.795  -4.873  1.00  0.50           N  
ATOM     90  CA  GLU A  24       0.185   5.725  -6.058  1.00  0.53           C  
ATOM     91  C   GLU A  24       0.523   4.662  -7.046  1.00  0.50           C  
ATOM     92  O   GLU A  24      -0.342   3.929  -7.522  1.00  0.55           O  
ATOM     93  N   ASN A  25       1.828   4.529  -7.344  1.00  0.51           N  
ATOM     94  CA  ASN A  25       2.286   3.431  -8.136  1.00  0.52           C  
ATOM     95  C   ASN A  25       2.110   2.080  -7.534  1.00  0.47           C  
ATOM     96  O   ASN A  25       1.705   1.124  -8.193  1.00  0.53           O  
ATOM     97  N   VAL A  26       2.301   1.912  -6.213  1.00  0.45           N  
ATOM     98  CA  VAL A  26       1.940   0.774  -5.426  1.00  0.44           C  
ATOM     99  C   VAL A  26       0.513   0.360  -5.548  1.00  0.40           C  
ATOM    100  O   VAL A  26       0.205  -0.803  -5.803  1.00  0.44           O  
ATOM    101  N   LYS A  27      -0.429   1.319  -5.510  1.00  0.40           N  
ATOM    102  CA  LYS A  27      -1.820   1.081  -5.740  1.00  0.41           C  
ATOM    103  C   LYS A  27      -2.145   0.574  -7.104  1.00  0.38           C  
ATOM    104  O   LYS A  27      -2.949  -0.338  -7.292  1.00  0.42           O  
ATOM    105  N   ALA A  28      -1.574   1.207  -8.143  1.00  0.39           N  
ATOM    106  CA  ALA A  28      -1.643   0.798  -9.512  1.00  0.39           C  
ATOM    107  C   ALA A  28      -1.152  -0.595  -9.711  1.00  0.36           C  
ATOM    108  O   ALA A  28      -1.744  -1.375 -10.456  1.00  0.42           O  
ATOM    109  N   LYS A  29      -0.101  -1.005  -8.981  1.00  0.39           N  
ATOM    110  CA  LYS A  29       0.405  -2.342  -8.943  1.00  0.43           C  
ATOM    111  C   LYS A  29      -0.529  -3.296  -8.281  1.00  0.44           C  
ATOM    112  O   LYS A  29      -0.543  -4.450  -8.705  1.00  0.54           O  
ATOM    113  N   ILE A  30      -1.337  -2.874  -7.292  1.00  0.41           N  
ATOM    114  CA  ILE A  30      -2.325  -3.750  -6.743  1.00  0.44           C  
ATOM    115  C   ILE A  30      -3.370  -3.985  -7.778  1.00  0.45           C  
ATOM    116  O   ILE A  30      -3.932  -5.071  -7.907  1.00  0.56           O  
ATOM    117  N   GLN A  31      -3.808  -2.963  -8.536  1.00  0.41           N  
ATOM    118  CA  GLN A  31      -4.725  -3.049  -9.629  1.00  0.48           C  
ATOM    119  C   GLN A  31      -4.336  -4.037 -10.675  1.00  0.52           C  
ATOM    120  O   GLN A  31      -5.138  -4.839 -11.152  1.00  0.66           O  
ATOM    121  N   ASP A  32      -3.056  -4.039 -11.086  1.00  0.50           N  
ATOM    122  CA  ASP A  32      -2.465  -5.075 -11.875  1.00  0.60           C  
ATOM    123  C   ASP A  32      -2.640  -6.389 -11.194  1.00  0.65           C  
ATOM    124  O   ASP A  32      -3.369  -7.208 -11.751  1.00  0.81           O  
ATOM    125  N   LYS A  33      -2.004  -6.672 -10.044  1.00  0.62           N  
ATOM    126  CA  LYS A  33      -2.053  -7.976  -9.456  1.00  0.73           C  
ATOM    127  C   LYS A  33      -3.370  -8.555  -9.067  1.00  0.69           C  
ATOM    128  O   LYS A  33      -3.701  -9.681  -9.434  1.00  0.83           O  
ATOM    129  N   GLU A  34      -4.126  -7.822  -8.232  1.00  0.63           N  
ATOM    130  CA  GLU A  34      -5.314  -8.217  -7.541  1.00  0.67           C  
ATOM    131  C   GLU A  34      -6.567  -7.849  -8.258  1.00  0.69           C  
ATOM    132  O   GLU A  34      -7.438  -8.681  -8.508  1.00  0.95           O  
ATOM    133  N   GLY A  35      -6.677  -6.569  -8.653  1.00  0.63           N  
ATOM    134  CA  GLY A  35      -7.750  -6.056  -9.447  1.00  0.68           C  
ATOM    135  C   GLY A  35      -8.560  -4.974  -8.820  1.00  0.76           C  
ATOM    136  O   GLY A  35      -9.735  -4.883  -9.171  1.00  1.12           O  
ATOM    137  N   ILE A  36      -8.055  -4.183  -7.856  1.00  0.70           N  
ATOM    138  CA  ILE A  36      -8.841  -3.230  -7.137  1.00  0.76           C  
ATOM    139  C   ILE A  36      -8.539  -1.868  -7.659  1.00  0.71           C  
ATOM    140  O   ILE A  36      -7.356  -1.559  -7.788  1.00  0.73           O  
ATOM    141  N   PRO A  37      -9.353  -0.901  -7.963  1.00  0.75           N  
ATOM    142  CA  PRO A  37      -8.988   0.405  -8.431  1.00  0.79           C  
ATOM    143  C   PRO A  37      -8.281   1.264  -7.439  1.00  0.75           C  
ATOM    144  O   PRO A  37      -8.684   1.195  -6.278  1.00  0.75           O  
ATOM    145  N   PRO A  38      -7.256   1.993  -7.764  1.00  0.81           N  
ATOM    146  CA  PRO A  38      -6.462   2.862  -6.945  1.00  0.85           C  
ATOM    147  C   PRO A  38      -7.290   3.937  -6.328  1.00  0.89           C  
ATOM    148  O   PRO A  38      -6.818   4.433  -5.306  1.00  0.99           O  
ATOM    149  N   ASP A  39      -8.469   4.243  -6.898  1.00  0.96           N  
ATOM    150  CA  ASP A  39      -9.350   5.224  -6.342  1.00  1.11           C  
ATOM    151  C   ASP A  39      -9.861   4.889  -4.983  1.00  1.00           C  
ATOM    152  O   ASP A  39     -10.040   5.679  -4.057  1.00  1.14           O  
ATOM    153  N   GLN A  40     -10.190   3.615  -4.704  1.00  0.87           N  
ATOM    154  CA  GLN A  40     -10.800   3.028  -3.552  1.00  0.84           C  
ATOM    155  C   GLN A  40      -9.797   2.888  -2.459  1.00  0.67           C  
ATOM    156  O   GLN A  40     -10.100   2.990  -1.272  1.00  0.80           O  
ATOM    157  N   GLN A  41      -8.518   2.689  -2.827  1.00  0.56           N  
ATOM    158  CA  GLN A  41      -7.559   2.225  -1.873  1.00  0.51           C  
ATOM    159  C   GLN A  41      -7.062   3.316  -0.987  1.00  0.49           C  
ATOM    160  O   GLN A  41      -6.980   4.478  -1.380  1.00  0.65           O  
ATOM    161  N   ARG A  42      -6.675   2.946   0.247  1.00  0.47           N  
ATOM    162  CA  ARG A  42      -5.953   3.778   1.158  1.00  0.55           C  
ATOM    163  C   ARG A  42      -4.945   2.901   1.818  1.00  0.46           C  
ATOM    164  O   ARG A  42      -5.144   1.687   1.804  1.00  0.52           O  
ATOM    165  N   LEU A  43      -3.838   3.461   2.337  1.00  0.46           N  
ATOM    166  CA  LEU A  43      -2.788   2.688   2.923  1.00  0.42           C  
ATOM    167  C   LEU A  43      -2.307   3.302   4.193  1.00  0.43           C  
ATOM    168  O   LEU A  43      -1.937   4.476   4.231  1.00  0.55           O  
ATOM    169  N   ILE A  44      -2.328   2.437   5.222  1.00  0.42           N  
ATOM    170  CA  ILE A  44      -1.785   2.815   6.491  1.00  0.46           C  
ATOM    171  C   ILE A  44      -0.476   2.114   6.610  1.00  0.42           C  
ATOM    172  O   ILE A  44      -0.280   1.006   6.113  1.00  0.53           O  
ATOM    173  N   PHE A  45       0.560   2.686   7.249  1.00  0.42           N  
ATOM    174  CA  PHE A  45       1.713   1.939   7.644  1.00  0.46           C  
ATOM    175  C   PHE A  45       1.932   2.409   9.042  1.00  0.68           C  
ATOM    176  O   PHE A  45       1.884   3.614   9.280  1.00  1.50           O  
ATOM    177  N   ALA A  46       2.019   1.474  10.006  1.00  0.81           N  
ATOM    178  CA  ALA A  46       2.136   1.498  11.431  1.00  0.96           C  
ATOM    179  C   ALA A  46       1.083   2.188  12.230  1.00  0.97           C  
ATOM    180  O   ALA A  46       0.511   1.674  13.190  1.00  1.21           O  
ATOM    181  N   GLY A  47       0.855   3.476  11.919  1.00  0.99           N  
ATOM    182  CA  GLY A  47      -0.183   4.289  12.473  1.00  1.10           C  
ATOM    183  C   GLY A  47      -0.581   5.430  11.602  1.00  1.03           C  
ATOM    184  O   GLY A  47      -1.573   6.127  11.811  1.00  1.30           O  
ATOM    185  N   LYS A  48       0.288   5.748  10.627  1.00  0.98           N  
ATOM    186  CA  LYS A  48       0.135   6.821   9.695  1.00  1.05           C  
ATOM    187  C   LYS A  48      -0.475   6.342   8.422  1.00  0.84           C  
ATOM    188  O   LYS A  48      -0.420   5.152   8.119  1.00  0.81           O  
ATOM    189  N   GLN A  49      -0.996   7.302   7.638  1.00  0.84           N  
ATOM    190  CA  GLN A  49      -1.628   7.092   6.372  1.00  0.80           C  
ATOM    191  C   GLN A  49      -0.800   7.788   5.347  1.00  0.72           C  
ATOM    192  O   GLN A  49      -0.438   8.940   5.577  1.00  0.83           O  
ATOM    193  N   LEU A  50      -0.405   7.034   4.305  1.00  0.69           N  
ATOM    194  CA  LEU A  50       0.673   7.507   3.492  1.00  0.66           C  
ATOM    195  C   LEU A  50       0.111   8.326   2.380  1.00  0.72           C  
ATOM    196  O   LEU A  50      -0.882   7.994   1.734  1.00  0.90           O  
ATOM    197  N   GLU A  51       0.664   9.523   2.123  1.00  0.70           N  
ATOM    198  CA  GLU A  51       0.298  10.300   0.979  1.00  0.76           C  
ATOM    199  C   GLU A  51       0.561   9.601  -0.310  1.00  0.77           C  
ATOM    200  O   GLU A  51       1.604   9.013  -0.596  1.00  1.23           O  
ATOM    201  N   ASP A  52      -0.267   9.738  -1.360  1.00  0.66           N  
ATOM    202  CA  ASP A  52      -0.178   8.932  -2.538  1.00  0.65           C  
ATOM    203  C   ASP A  52       1.021   9.217  -3.376  1.00  0.60           C  
ATOM    204  O   ASP A  52       1.751   8.291  -3.725  1.00  0.62           O  
ATOM    205  N   GLY A  53       1.409  10.482  -3.618  1.00  0.68           N  
ATOM    206  CA  GLY A  53       2.610  10.831  -4.311  1.00  0.73           C  
ATOM    207  C   GLY A  53       3.682  11.153  -3.328  1.00  0.72           C  
ATOM    208  O   GLY A  53       4.376  12.169  -3.323  1.00  0.97           O  
ATOM    209  N   ARG A  54       3.898  10.201  -2.402  1.00  0.64           N  
ATOM    210  CA  ARG A  54       5.079  10.234  -1.597  1.00  0.63           C  
ATOM    211  C   ARG A  54       5.675   8.917  -1.955  1.00  0.59           C  
ATOM    212  O   ARG A  54       4.933   7.981  -2.248  1.00  0.62           O  
ATOM    213  N   THR A  55       7.008   8.818  -1.801  1.00  0.63           N  
ATOM    214  CA  THR A  55       7.715   7.606  -2.077  1.00  0.61           C  
ATOM    215  C   THR A  55       7.839   6.712  -0.892  1.00  0.59           C  
ATOM    216  O   THR A  55       7.644   7.159   0.237  1.00  0.64           O  
ATOM    217  N   LEU A  56       8.258   5.477  -1.218  1.00  0.58           N  
ATOM    218  CA  LEU A  56       8.636   4.571  -0.178  1.00  0.59           C  
ATOM    219  C   LEU A  56       9.842   5.024   0.570  1.00  0.64           C  
ATOM    220  O   LEU A  56       9.851   4.908   1.794  1.00  0.70           O  
ATOM    221  N   SER A  57      10.896   5.531  -0.095  1.00  0.68           N  
ATOM    222  CA  SER A  57      12.057   6.086   0.531  1.00  0.75           C  
ATOM    223  C   SER A  57      11.777   7.240   1.431  1.00  0.76           C  
ATOM    224  O   SER A  57      12.337   7.280   2.524  1.00  0.84           O  
ATOM    225  N   ASP A  58      10.857   8.132   1.020  1.00  0.75           N  
ATOM    226  CA  ASP A  58      10.454   9.227   1.847  1.00  0.78           C  
ATOM    227  C   ASP A  58       9.826   8.884   3.154  1.00  0.77           C  
ATOM    228  O   ASP A  58      10.191   9.533   4.133  1.00  0.86           O  
ATOM    229  N   TYR A  59       8.951   7.865   3.193  1.00  0.72           N  
ATOM    230  CA  TYR A  59       8.399   7.390   4.423  1.00  0.73           C  
ATOM    231  C   TYR A  59       9.319   6.503   5.188  1.00  0.76           C  
ATOM    232  O   TYR A  59       9.122   6.354   6.393  1.00  0.89           O  
ATOM    233  N   ASN A  60      10.442   6.078   4.581  1.00  0.74           N  
ATOM    234  CA  ASN A  60      11.544   5.242   4.944  1.00  0.79           C  
ATOM    235  C   ASN A  60      11.202   3.801   5.114  1.00  0.75           C  
ATOM    236  O   ASN A  60      11.731   3.080   5.958  1.00  0.86           O  
ATOM    237  N   ILE A  61      10.340   3.295   4.215  1.00  0.67           N  
ATOM    238  CA  ILE A  61       9.859   1.950   4.136  1.00  0.65           C  
ATOM    239  C   ILE A  61      10.989   1.112   3.644  1.00  0.66           C  
ATOM    240  O   ILE A  61      11.740   1.447   2.730  1.00  0.75           O  
ATOM    241  N   GLN A  62      11.101  -0.084   4.247  1.00  0.67           N  
ATOM    242  CA  GLN A  62      12.136  -1.052   4.053  1.00  0.70           C  
ATOM    243  C   GLN A  62      11.481  -2.288   3.541  1.00  0.62           C  
ATOM    244  O   GLN A  62      10.277  -2.408   3.322  1.00  0.64           O  
ATOM    245  N   LYS A  63      12.341  -3.304   3.342  1.00  0.64           N  
ATOM    246  CA  LYS A  63      11.911  -4.647   3.105  1.00  0.62           C  
ATOM    247  C   LYS A  63      11.203  -5.318   4.232  1.00  0.59           C  
ATOM    248  O   LYS A  63      11.456  -5.154   5.424  1.00  0.66           O  
ATOM    249  N   GLU A  64      10.267  -6.193   3.823  1.00  0.57           N  
ATOM    250  CA  GLU A  64       9.514  -7.086   4.648  1.00  0.58           C  
ATOM    251  C   GLU A  64       8.511  -6.405   5.514  1.00  0.56           C  
ATOM    252  O   GLU A  64       8.040  -6.990   6.487  1.00  0.70           O  
ATOM    253  N   SER A  65       8.124  -5.181   5.113  1.00  0.51           N  
ATOM    254  CA  SER A  65       7.242  -4.355   5.878  1.00  0.51           C  
ATOM    255  C   SER A  65       5.844  -4.594   5.421  1.00  0.43           C  
ATOM    256  O   SER A  65       5.536  -4.794   4.247  1.00  0.50           O  
ATOM    257  N   THR A  66       4.890  -4.620   6.369  1.00  0.45           N  
ATOM    258  CA  THR A  66       3.482  -4.821   6.230  1.00  0.45           C  
ATOM    259  C   THR A  66       2.720  -3.541   6.179  1.00  0.43           C  
ATOM    260  O   THR A  66       2.426  -3.020   7.254  1.00  0.58           O  
ATOM    261  N   LEU A  67       2.331  -3.105   4.967  1.00  0.38           N  
ATOM    262  CA  LEU A  67       1.429  -2.005   4.819  1.00  0.38           C  
ATOM    263  C   LEU A  67       0.085  -2.626   4.985  1.00  0.37           C  
ATOM    264  O   LEU A  67      -0.269  -3.770   4.702  1.00  0.50           O  
ATOM    265  N   HIS A  68      -0.783  -1.734   5.494  1.00  0.35           N  
ATOM    266  CA  HIS A  68      -2.175  -1.968   5.719  1.00  0.37           C  
ATOM    267  C   HIS A  68      -3.130  -1.302   4.789  1.00  0.35           C  
ATOM    268  O   HIS A  68      -3.508  -0.137   4.901  1.00  0.48           O  
ATOM    269  N   LEU A  69      -3.572  -2.116   3.814  1.00  0.36           N  
ATOM    270  CA  LEU A  69      -4.645  -1.802   2.923  1.00  0.38           C  
ATOM    271  C   LEU A  69      -5.994  -1.622   3.529  1.00  0.41           C  
ATOM    272  O   LEU A  69      -6.498  -2.583   4.108  1.00  0.56           O  
ATOM    273  N   VAL A  70      -6.565  -0.408   3.426  1.00  0.45           N  
ATOM    274  CA  VAL A  70      -7.893  -0.137   3.880  1.00  0.56           C  
ATOM    275  C   VAL A  70      -8.498   0.579   2.721  1.00  0.55           C  
ATOM    276  O   VAL A  70      -7.848   0.823   1.705  1.00  0.58           O  
TER
ENDMDL
MODEL      15
ATOM      1  N   GLN A   2      11.210  -6.511  -1.600  1.00  0.59           N  
ATOM      2  CA  GLN A   2       9.960  -7.119  -1.268  1.00  0.56           C  
ATOM      3  C   GLN A   2       9.144  -6.427  -0.231  1.00  0.50           C  
ATOM      4  O   GLN A   2       9.712  -5.958   0.754  1.00  0.60           O  
ATOM      5  N   ILE A   3       7.843  -6.209  -0.495  1.00  0.44           N  
ATOM      6  CA  ILE A   3       6.979  -5.664   0.506  1.00  0.42           C  
ATOM      7  C   ILE A   3       5.766  -6.507   0.707  1.00  0.40           C  
ATOM      8  O   ILE A   3       5.540  -7.317  -0.189  1.00  0.50           O  
ATOM      9  N   PHE A   4       5.002  -6.299   1.795  1.00  0.37           N  
ATOM     10  CA  PHE A   4       3.863  -7.080   2.166  1.00  0.38           C  
ATOM     11  C   PHE A   4       2.735  -6.121   2.336  1.00  0.39           C  
ATOM     12  O   PHE A   4       2.871  -5.108   3.021  1.00  0.60           O  
ATOM     13  N   VAL A   5       1.616  -6.416   1.651  1.00  0.35           N  
ATOM     14  CA  VAL A   5       0.413  -5.645   1.729  1.00  0.35           C  
ATOM     15  C   VAL A   5      -0.655  -6.449   2.386  1.00  0.35           C  
ATOM     16  O   VAL A   5      -1.038  -7.491   1.857  1.00  0.46           O  
ATOM     17  N   LYS A   6      -1.159  -6.163   3.601  1.00  0.36           N  
ATOM     18  CA  LYS A   6      -2.207  -6.931   4.197  1.00  0.39           C  
ATOM     19  C   LYS A   6      -3.546  -6.343   3.910  1.00  0.46           C  
ATOM     20  O   LYS A   6      -3.772  -5.147   4.090  1.00  0.53           O  
ATOM     21  N   THR A   7      -4.545  -7.165   3.544  1.00  0.58           N  
ATOM     22  CA  THR A   7      -5.870  -6.647   3.396  1.00  0.78           C  
ATOM     23  C   THR A   7      -6.546  -6.619   4.724  1.00  0.94           C  
ATOM     24  O   THR A   7      -5.925  -6.793   5.771  1.00  0.99           O  
ATOM     25  N   LEU A   8      -7.873  -6.406   4.778  1.00  1.17           N  
ATOM     26  CA  LEU A   8      -8.609  -6.542   5.996  1.00  1.39           C  
ATOM     27  C   LEU A   8      -9.164  -7.914   6.169  1.00  1.44           C  
ATOM     28  O   LEU A   8      -9.439  -8.329   7.293  1.00  1.60           O  
ATOM     29  N   THR A   9      -9.356  -8.665   5.070  1.00  1.41           N  
ATOM     30  CA  THR A   9     -10.013  -9.934   5.118  1.00  1.51           C  
ATOM     31  C   THR A   9      -9.135 -11.056   5.556  1.00  1.37           C  
ATOM     32  O   THR A   9      -9.540 -11.866   6.388  1.00  1.62           O  
ATOM     33  N   GLY A  10      -7.929 -11.149   4.967  1.00  1.18           N  
ATOM     34  CA  GLY A  10      -7.058 -12.176   5.449  1.00  1.22           C  
ATOM     35  C   GLY A  10      -6.006 -12.519   4.451  1.00  0.99           C  
ATOM     36  O   GLY A  10      -5.504 -13.641   4.468  1.00  1.31           O  
ATOM     37  N   LYS A  11      -5.667 -11.571   3.559  1.00  0.73           N  
ATOM     38  CA  LYS A  11      -4.705 -11.856   2.540  1.00  0.60           C  
ATOM     39  C   LYS A  11      -3.543 -10.941   2.718  1.00  0.51           C  
ATOM     40  O   LYS A  11      -3.723  -9.725   2.687  1.00  0.63           O  
ATOM     41  N   THR A  12      -2.341 -11.532   2.845  1.00  0.49           N  
ATOM     42  CA  THR A  12      -1.107 -10.814   2.770  1.00  0.48           C  
ATOM     43  C   THR A  12      -0.471 -11.020   1.438  1.00  0.52           C  
ATOM     44  O   THR A  12      -0.227 -12.162   1.050  1.00  0.72           O  
ATOM     45  N   ILE A  13      -0.254  -9.974   0.621  1.00  0.48           N  
ATOM     46  CA  ILE A  13       0.162 -10.001  -0.746  1.00  0.55           C  
ATOM     47  C   ILE A  13       1.595  -9.605  -0.854  1.00  0.51           C  
ATOM     48  O   ILE A  13       1.903  -8.568  -0.268  1.00  0.56           O  
ATOM     49  N   THR A  14       2.403 -10.416  -1.559  1.00  0.55           N  
ATOM     50  CA  THR A  14       3.807 -10.170  -1.674  1.00  0.54           C  
ATOM     51  C   THR A  14       4.061  -9.510  -2.986  1.00  0.55           C  
ATOM     52  O   THR A  14       3.832 -10.115  -4.031  1.00  0.72           O  
ATOM     53  N   LEU A  15       4.434  -8.220  -3.065  1.00  0.50           N  
ATOM     54  CA  LEU A  15       4.698  -7.500  -4.272  1.00  0.55           C  
ATOM     55  C   LEU A  15       6.091  -6.976  -4.250  1.00  0.52           C  
ATOM     56  O   LEU A  15       6.702  -6.584  -3.256  1.00  0.58           O  
ATOM     57  N   GLU A  16       6.741  -6.895  -5.425  1.00  0.59           N  
ATOM     58  CA  GLU A  16       8.026  -6.272  -5.496  1.00  0.63           C  
ATOM     59  C   GLU A  16       8.004  -4.865  -5.984  1.00  0.65           C  
ATOM     60  O   GLU A  16       7.455  -4.585  -7.048  1.00  0.81           O  
ATOM     61  N   VAL A  17       8.559  -3.861  -5.281  1.00  0.61           N  
ATOM     62  CA  VAL A  17       8.537  -2.473  -5.623  1.00  0.63           C  
ATOM     63  C   VAL A  17       9.959  -2.030  -5.647  1.00  0.65           C  
ATOM     64  O   VAL A  17      10.776  -2.588  -4.917  1.00  0.76           O  
ATOM     65  N   GLU A  18      10.389  -1.036  -6.445  1.00  0.68           N  
ATOM     66  CA  GLU A  18      11.633  -0.332  -6.393  1.00  0.74           C  
ATOM     67  C   GLU A  18      11.609   0.825  -5.454  1.00  0.71           C  
ATOM     68  O   GLU A  18      10.593   1.510  -5.564  1.00  0.74           O  
ATOM     69  N   PRO A  19      12.561   1.198  -4.651  1.00  0.74           N  
ATOM     70  CA  PRO A  19      12.339   2.142  -3.595  1.00  0.74           C  
ATOM     71  C   PRO A  19      12.272   3.547  -4.085  1.00  0.70           C  
ATOM     72  O   PRO A  19      12.132   4.503  -3.324  1.00  0.74           O  
ATOM     73  N   SER A  20      12.312   3.794  -5.406  1.00  0.70           N  
ATOM     74  CA  SER A  20      12.113   5.084  -5.992  1.00  0.74           C  
ATOM     75  C   SER A  20      10.782   5.193  -6.654  1.00  0.71           C  
ATOM     76  O   SER A  20      10.540   6.205  -7.310  1.00  0.80           O  
ATOM     77  N   ASP A  21       9.853   4.233  -6.494  1.00  0.70           N  
ATOM     78  CA  ASP A  21       8.530   4.454  -6.987  1.00  0.73           C  
ATOM     79  C   ASP A  21       7.680   5.064  -5.927  1.00  0.64           C  
ATOM     80  O   ASP A  21       7.963   5.086  -4.731  1.00  0.66           O  
ATOM     81  N   THR A  22       6.601   5.749  -6.348  1.00  0.63           N  
ATOM     82  CA  THR A  22       5.708   6.475  -5.499  1.00  0.58           C  
ATOM     83  C   THR A  22       4.724   5.500  -4.950  1.00  0.53           C  
ATOM     84  O   THR A  22       4.469   4.418  -5.476  1.00  0.58           O  
ATOM     85  N   ILE A  23       4.000   5.945  -3.907  1.00  0.51           N  
ATOM     86  CA  ILE A  23       2.945   5.274  -3.216  1.00  0.48           C  
ATOM     87  C   ILE A  23       1.749   5.139  -4.094  1.00  0.48           C  
ATOM     88  O   ILE A  23       1.033   4.139  -4.063  1.00  0.51           O  
ATOM     89  N   GLU A  24       1.507   6.190  -4.898  1.00  0.50           N  
ATOM     90  CA  GLU A  24       0.541   6.108  -5.949  1.00  0.53           C  
ATOM     91  C   GLU A  24       0.754   5.024  -6.947  1.00  0.50           C  
ATOM     92  O   GLU A  24      -0.111   4.318  -7.464  1.00  0.55           O  
ATOM     93  N   ASN A  25       1.992   4.640  -7.305  1.00  0.51           N  
ATOM     94  CA  ASN A  25       2.239   3.568  -8.221  1.00  0.52           C  
ATOM     95  C   ASN A  25       2.205   2.223  -7.581  1.00  0.47           C  
ATOM     96  O   ASN A  25       1.794   1.292  -8.272  1.00  0.53           O  
ATOM     97  N   VAL A  26       2.491   2.092  -6.273  1.00  0.45           N  
ATOM     98  CA  VAL A  26       2.218   0.951  -5.455  1.00  0.44           C  
ATOM     99  C   VAL A  26       0.798   0.506  -5.514  1.00  0.40           C  
ATOM    100  O   VAL A  26       0.488  -0.662  -5.748  1.00  0.44           O  
ATOM    101  N   LYS A  27      -0.171   1.435  -5.442  1.00  0.40           N  
ATOM    102  CA  LYS A  27      -1.567   1.159  -5.583  1.00  0.41           C  
ATOM    103  C   LYS A  27      -1.898   0.728  -6.971  1.00  0.38           C  
ATOM    104  O   LYS A  27      -2.656  -0.219  -7.168  1.00  0.42           O  
ATOM    105  N   ALA A  28      -1.298   1.355  -7.999  1.00  0.39           N  
ATOM    106  CA  ALA A  28      -1.438   1.009  -9.379  1.00  0.39           C  
ATOM    107  C   ALA A  28      -1.003  -0.380  -9.698  1.00  0.36           C  
ATOM    108  O   ALA A  28      -1.653  -1.171 -10.380  1.00  0.42           O  
ATOM    109  N   LYS A  29       0.064  -0.833  -9.016  1.00  0.39           N  
ATOM    110  CA  LYS A  29       0.455  -2.204  -8.894  1.00  0.43           C  
ATOM    111  C   LYS A  29      -0.486  -3.102  -8.168  1.00  0.44           C  
ATOM    112  O   LYS A  29      -0.888  -4.152  -8.669  1.00  0.54           O  
ATOM    113  N   ILE A  30      -1.023  -2.735  -6.991  1.00  0.41           N  
ATOM    114  CA  ILE A  30      -2.123  -3.429  -6.396  1.00  0.44           C  
ATOM    115  C   ILE A  30      -3.372  -3.423  -7.208  1.00  0.45           C  
ATOM    116  O   ILE A  30      -4.112  -4.405  -7.181  1.00  0.56           O  
ATOM    117  N   GLN A  31      -3.679  -2.455  -8.090  1.00  0.41           N  
ATOM    118  CA  GLN A  31      -4.795  -2.440  -8.985  1.00  0.48           C  
ATOM    119  C   GLN A  31      -4.635  -3.506 -10.013  1.00  0.52           C  
ATOM    120  O   GLN A  31      -5.509  -4.316 -10.321  1.00  0.66           O  
ATOM    121  N   ASP A  32      -3.422  -3.612 -10.586  1.00  0.50           N  
ATOM    122  CA  ASP A  32      -2.998  -4.607 -11.520  1.00  0.60           C  
ATOM    123  C   ASP A  32      -3.158  -5.920 -10.835  1.00  0.65           C  
ATOM    124  O   ASP A  32      -3.566  -6.868 -11.504  1.00  0.81           O  
ATOM    125  N   LYS A  33      -2.914  -6.111  -9.526  1.00  0.62           N  
ATOM    126  CA  LYS A  33      -2.873  -7.361  -8.832  1.00  0.73           C  
ATOM    127  C   LYS A  33      -4.225  -7.930  -8.574  1.00  0.69           C  
ATOM    128  O   LYS A  33      -4.521  -9.047  -8.996  1.00  0.83           O  
ATOM    129  N   GLU A  34      -5.038  -7.096  -7.901  1.00  0.63           N  
ATOM    130  CA  GLU A  34      -6.257  -7.478  -7.257  1.00  0.67           C  
ATOM    131  C   GLU A  34      -7.497  -6.928  -7.872  1.00  0.69           C  
ATOM    132  O   GLU A  34      -8.584  -7.443  -7.610  1.00  0.95           O  
ATOM    133  N   GLY A  35      -7.384  -5.899  -8.730  1.00  0.63           N  
ATOM    134  CA  GLY A  35      -8.503  -5.346  -9.428  1.00  0.68           C  
ATOM    135  C   GLY A  35      -9.208  -4.238  -8.727  1.00  0.76           C  
ATOM    136  O   GLY A  35     -10.318  -3.829  -9.065  1.00  1.12           O  
ATOM    137  N   ILE A  36      -8.492  -3.600  -7.784  1.00  0.70           N  
ATOM    138  CA  ILE A  36      -8.987  -2.522  -6.986  1.00  0.76           C  
ATOM    139  C   ILE A  36      -8.491  -1.210  -7.491  1.00  0.71           C  
ATOM    140  O   ILE A  36      -7.290  -1.038  -7.688  1.00  0.73           O  
ATOM    141  N   PRO A  37      -9.213  -0.150  -7.703  1.00  0.75           N  
ATOM    142  CA  PRO A  37      -8.739   1.121  -8.168  1.00  0.79           C  
ATOM    143  C   PRO A  37      -7.920   1.891  -7.190  1.00  0.75           C  
ATOM    144  O   PRO A  37      -8.148   1.770  -5.987  1.00  0.75           O  
ATOM    145  N   PRO A  38      -6.913   2.649  -7.508  1.00  0.81           N  
ATOM    146  CA  PRO A  38      -6.089   3.420  -6.624  1.00  0.85           C  
ATOM    147  C   PRO A  38      -6.692   4.643  -6.024  1.00  0.89           C  
ATOM    148  O   PRO A  38      -6.191   5.140  -5.017  1.00  0.99           O  
ATOM    149  N   ASP A  39      -7.911   5.040  -6.431  1.00  0.96           N  
ATOM    150  CA  ASP A  39      -8.705   6.055  -5.810  1.00  1.11           C  
ATOM    151  C   ASP A  39      -9.379   5.470  -4.617  1.00  1.00           C  
ATOM    152  O   ASP A  39      -9.562   6.194  -3.639  1.00  1.14           O  
ATOM    153  N   GLN A  40      -9.843   4.215  -4.749  1.00  0.87           N  
ATOM    154  CA  GLN A  40     -10.500   3.522  -3.685  1.00  0.84           C  
ATOM    155  C   GLN A  40      -9.572   3.072  -2.609  1.00  0.67           C  
ATOM    156  O   GLN A  40      -9.922   3.054  -1.431  1.00  0.80           O  
ATOM    157  N   GLN A  41      -8.352   2.654  -2.993  1.00  0.56           N  
ATOM    158  CA  GLN A  41      -7.422   2.104  -2.056  1.00  0.51           C  
ATOM    159  C   GLN A  41      -6.792   3.109  -1.155  1.00  0.49           C  
ATOM    160  O   GLN A  41      -6.448   4.225  -1.545  1.00  0.65           O  
ATOM    161  N   ARG A  42      -6.722   2.787   0.149  1.00  0.47           N  
ATOM    162  CA  ARG A  42      -6.143   3.621   1.157  1.00  0.55           C  
ATOM    163  C   ARG A  42      -5.051   2.851   1.817  1.00  0.46           C  
ATOM    164  O   ARG A  42      -5.422   1.858   2.439  1.00  0.52           O  
ATOM    165  N   LEU A  43      -3.782   3.291   1.748  1.00  0.46           N  
ATOM    166  CA  LEU A  43      -2.735   2.499   2.317  1.00  0.42           C  
ATOM    167  C   LEU A  43      -2.420   3.122   3.633  1.00  0.43           C  
ATOM    168  O   LEU A  43      -2.059   4.286   3.800  1.00  0.55           O  
ATOM    169  N   ILE A  44      -2.457   2.354   4.737  1.00  0.42           N  
ATOM    170  CA  ILE A  44      -2.130   2.744   6.074  1.00  0.46           C  
ATOM    171  C   ILE A  44      -0.811   2.080   6.274  1.00  0.42           C  
ATOM    172  O   ILE A  44      -0.599   0.967   5.796  1.00  0.53           O  
ATOM    173  N   PHE A  45       0.093   2.774   6.988  1.00  0.42           N  
ATOM    174  CA  PHE A  45       1.308   2.113   7.351  1.00  0.46           C  
ATOM    175  C   PHE A  45       1.793   2.783   8.591  1.00  0.68           C  
ATOM    176  O   PHE A  45       1.852   3.991   8.815  1.00  1.50           O  
ATOM    177  N   ALA A  46       2.169   1.902   9.536  1.00  0.81           N  
ATOM    178  CA  ALA A  46       2.621   2.174  10.865  1.00  0.96           C  
ATOM    179  C   ALA A  46       1.608   2.790  11.767  1.00  0.97           C  
ATOM    180  O   ALA A  46       1.472   2.281  12.877  1.00  1.21           O  
ATOM    181  N   GLY A  47       1.028   3.958  11.436  1.00  0.99           N  
ATOM    182  CA  GLY A  47       0.146   4.674  12.305  1.00  1.10           C  
ATOM    183  C   GLY A  47      -0.672   5.612  11.485  1.00  1.03           C  
ATOM    184  O   GLY A  47      -1.738   6.051  11.914  1.00  1.30           O  
ATOM    185  N   LYS A  48      -0.309   5.978  10.243  1.00  0.98           N  
ATOM    186  CA  LYS A  48      -1.117   6.896   9.502  1.00  1.05           C  
ATOM    187  C   LYS A  48      -1.324   6.455   8.094  1.00  0.84           C  
ATOM    188  O   LYS A  48      -0.582   5.586   7.640  1.00  0.81           O  
ATOM    189  N   GLN A  49      -2.320   7.025   7.392  1.00  0.84           N  
ATOM    190  CA  GLN A  49      -2.514   6.846   5.988  1.00  0.80           C  
ATOM    191  C   GLN A  49      -1.470   7.548   5.189  1.00  0.72           C  
ATOM    192  O   GLN A  49      -0.978   8.572   5.661  1.00  0.83           O  
ATOM    193  N   LEU A  50      -1.107   7.124   3.965  1.00  0.69           N  
ATOM    194  CA  LEU A  50      -0.003   7.657   3.228  1.00  0.66           C  
ATOM    195  C   LEU A  50      -0.374   8.682   2.213  1.00  0.72           C  
ATOM    196  O   LEU A  50      -1.524   9.070   2.017  1.00  0.90           O  
ATOM    197  N   GLU A  51       0.627   9.333   1.594  1.00  0.70           N  
ATOM    198  CA  GLU A  51       0.455  10.320   0.574  1.00  0.76           C  
ATOM    199  C   GLU A  51       0.788   9.755  -0.763  1.00  0.77           C  
ATOM    200  O   GLU A  51       1.490   8.748  -0.855  1.00  1.23           O  
ATOM    201  N   ASP A  52       0.237  10.252  -1.884  1.00  0.66           N  
ATOM    202  CA  ASP A  52       0.316   9.461  -3.073  1.00  0.65           C  
ATOM    203  C   ASP A  52       1.573   9.798  -3.800  1.00  0.60           C  
ATOM    204  O   ASP A  52       2.375   8.923  -4.120  1.00  0.62           O  
ATOM    205  N   GLY A  53       1.784  11.104  -4.043  1.00  0.68           N  
ATOM    206  CA  GLY A  53       3.021  11.605  -4.556  1.00  0.73           C  
ATOM    207  C   GLY A  53       4.172  11.674  -3.613  1.00  0.72           C  
ATOM    208  O   GLY A  53       4.942  12.633  -3.594  1.00  0.97           O  
ATOM    209  N   ARG A  54       4.422  10.608  -2.831  1.00  0.64           N  
ATOM    210  CA  ARG A  54       5.642  10.498  -2.090  1.00  0.63           C  
ATOM    211  C   ARG A  54       6.219   9.164  -2.414  1.00  0.59           C  
ATOM    212  O   ARG A  54       5.491   8.321  -2.937  1.00  0.62           O  
ATOM    213  N   THR A  55       7.496   8.894  -2.091  1.00  0.63           N  
ATOM    214  CA  THR A  55       8.155   7.660  -2.386  1.00  0.61           C  
ATOM    215  C   THR A  55       8.231   6.694  -1.254  1.00  0.59           C  
ATOM    216  O   THR A  55       7.946   7.052  -0.112  1.00  0.64           O  
ATOM    217  N   LEU A  56       8.668   5.462  -1.572  1.00  0.58           N  
ATOM    218  CA  LEU A  56       8.998   4.403  -0.671  1.00  0.59           C  
ATOM    219  C   LEU A  56      10.150   4.851   0.161  1.00  0.64           C  
ATOM    220  O   LEU A  56      10.223   4.462   1.325  1.00  0.70           O  
ATOM    221  N   SER A  57      11.107   5.541  -0.486  1.00  0.68           N  
ATOM    222  CA  SER A  57      12.317   6.113   0.017  1.00  0.75           C  
ATOM    223  C   SER A  57      12.025   7.213   0.979  1.00  0.76           C  
ATOM    224  O   SER A  57      12.645   7.250   2.040  1.00  0.84           O  
ATOM    225  N   ASP A  58      11.142   8.173   0.649  1.00  0.75           N  
ATOM    226  CA  ASP A  58      10.714   9.209   1.537  1.00  0.78           C  
ATOM    227  C   ASP A  58      10.210   8.721   2.853  1.00  0.77           C  
ATOM    228  O   ASP A  58      10.576   9.183   3.932  1.00  0.86           O  
ATOM    229  N   TYR A  59       9.422   7.631   2.834  1.00  0.72           N  
ATOM    230  CA  TYR A  59       8.943   6.979   4.013  1.00  0.73           C  
ATOM    231  C   TYR A  59       9.920   6.033   4.624  1.00  0.76           C  
ATOM    232  O   TYR A  59       9.713   5.484   5.705  1.00  0.89           O  
ATOM    233  N   ASN A  60      11.048   5.790   3.935  1.00  0.74           N  
ATOM    234  CA  ASN A  60      12.169   4.961   4.254  1.00  0.79           C  
ATOM    235  C   ASN A  60      11.777   3.547   4.519  1.00  0.75           C  
ATOM    236  O   ASN A  60      12.246   2.874   5.435  1.00  0.86           O  
ATOM    237  N   ILE A  61      10.884   3.096   3.619  1.00  0.67           N  
ATOM    238  CA  ILE A  61      10.387   1.756   3.628  1.00  0.65           C  
ATOM    239  C   ILE A  61      11.370   0.764   3.106  1.00  0.66           C  
ATOM    240  O   ILE A  61      11.810   0.783   1.957  1.00  0.75           O  
ATOM    241  N   GLN A  62      11.892  -0.070   4.021  1.00  0.67           N  
ATOM    242  CA  GLN A  62      12.909  -1.044   3.765  1.00  0.70           C  
ATOM    243  C   GLN A  62      12.249  -2.258   3.208  1.00  0.62           C  
ATOM    244  O   GLN A  62      11.022  -2.321   3.154  1.00  0.64           O  
ATOM    245  N   LYS A  63      13.032  -3.316   2.931  1.00  0.64           N  
ATOM    246  CA  LYS A  63      12.563  -4.592   2.491  1.00  0.62           C  
ATOM    247  C   LYS A  63      11.774  -5.270   3.558  1.00  0.59           C  
ATOM    248  O   LYS A  63      11.982  -5.010   4.742  1.00  0.66           O  
ATOM    249  N   GLU A  64      10.779  -6.100   3.197  1.00  0.57           N  
ATOM    250  CA  GLU A  64      10.003  -7.035   3.951  1.00  0.58           C  
ATOM    251  C   GLU A  64       9.127  -6.257   4.872  1.00  0.56           C  
ATOM    252  O   GLU A  64       8.846  -6.748   5.964  1.00  0.70           O  
ATOM    253  N   SER A  65       8.624  -5.060   4.520  1.00  0.51           N  
ATOM    254  CA  SER A  65       7.833  -4.251   5.393  1.00  0.51           C  
ATOM    255  C   SER A  65       6.375  -4.447   5.156  1.00  0.43           C  
ATOM    256  O   SER A  65       5.987  -4.650   4.007  1.00  0.50           O  
ATOM    257  N   THR A  66       5.518  -4.507   6.192  1.00  0.45           N  
ATOM    258  CA  THR A  66       4.106  -4.705   6.087  1.00  0.45           C  
ATOM    259  C   THR A  66       3.376  -3.412   6.214  1.00  0.43           C  
ATOM    260  O   THR A  66       3.251  -2.812   7.280  1.00  0.58           O  
ATOM    261  N   LEU A  67       2.715  -3.089   5.088  1.00  0.38           N  
ATOM    262  CA  LEU A  67       1.810  -1.997   4.910  1.00  0.38           C  
ATOM    263  C   LEU A  67       0.442  -2.585   4.904  1.00  0.37           C  
ATOM    264  O   LEU A  67       0.297  -3.765   4.586  1.00  0.50           O  
ATOM    265  N   HIS A  68      -0.611  -1.821   5.249  1.00  0.35           N  
ATOM    266  CA  HIS A  68      -2.002  -2.148   5.305  1.00  0.37           C  
ATOM    267  C   HIS A  68      -2.805  -1.535   4.210  1.00  0.35           C  
ATOM    268  O   HIS A  68      -2.866  -0.321   4.023  1.00  0.48           O  
ATOM    269  N   LEU A  69      -3.526  -2.321   3.391  1.00  0.36           N  
ATOM    270  CA  LEU A  69      -4.358  -1.927   2.296  1.00  0.38           C  
ATOM    271  C   LEU A  69      -5.759  -1.985   2.801  1.00  0.41           C  
ATOM    272  O   LEU A  69      -6.220  -3.092   3.075  1.00  0.56           O  
ATOM    273  N   VAL A  70      -6.295  -0.792   3.113  1.00  0.45           N  
ATOM    274  CA  VAL A  70      -7.683  -0.723   3.449  1.00  0.56           C  
ATOM    275  C   VAL A  70      -8.330   0.026   2.336  1.00  0.55           C  
ATOM    276  O   VAL A  70      -7.695   0.386   1.345  1.00  0.58           O  
TER
ENDMDL
MODEL      16
ATOM      1  N   GLN A   2      11.269  -6.252  -1.597  1.00  0.59           N  
ATOM      2  CA  GLN A   2      10.044  -6.967  -1.415  1.00  0.56           C  
ATOM      3  C   GLN A   2       9.304  -6.498  -0.210  1.00  0.50           C  
ATOM      4  O   GLN A   2       9.863  -6.447   0.885  1.00  0.60           O  
ATOM      5  N   ILE A   3       8.038  -6.057  -0.312  1.00  0.44           N  
ATOM      6  CA  ILE A   3       7.151  -5.571   0.699  1.00  0.42           C  
ATOM      7  C   ILE A   3       5.879  -6.348   0.724  1.00  0.40           C  
ATOM      8  O   ILE A   3       5.518  -6.974  -0.270  1.00  0.50           O  
ATOM      9  N   PHE A   4       5.144  -6.236   1.846  1.00  0.37           N  
ATOM     10  CA  PHE A   4       3.962  -7.021   2.019  1.00  0.38           C  
ATOM     11  C   PHE A   4       2.828  -6.088   2.270  1.00  0.39           C  
ATOM     12  O   PHE A   4       2.954  -5.042   2.906  1.00  0.60           O  
ATOM     13  N   VAL A   5       1.726  -6.436   1.582  1.00  0.35           N  
ATOM     14  CA  VAL A   5       0.515  -5.713   1.813  1.00  0.35           C  
ATOM     15  C   VAL A   5      -0.476  -6.574   2.517  1.00  0.35           C  
ATOM     16  O   VAL A   5      -0.709  -7.705   2.093  1.00  0.46           O  
ATOM     17  N   LYS A   6      -0.985  -6.113   3.673  1.00  0.36           N  
ATOM     18  CA  LYS A   6      -2.030  -6.756   4.408  1.00  0.39           C  
ATOM     19  C   LYS A   6      -3.342  -6.143   4.053  1.00  0.46           C  
ATOM     20  O   LYS A   6      -3.568  -4.962   4.304  1.00  0.53           O  
ATOM     21  N   THR A   7      -4.271  -6.923   3.470  1.00  0.58           N  
ATOM     22  CA  THR A   7      -5.575  -6.453   3.116  1.00  0.78           C  
ATOM     23  C   THR A   7      -6.428  -6.384   4.335  1.00  0.94           C  
ATOM     24  O   THR A   7      -6.070  -6.747   5.454  1.00  0.99           O  
ATOM     25  N   LEU A   8      -7.719  -6.015   4.251  1.00  1.17           N  
ATOM     26  CA  LEU A   8      -8.621  -6.038   5.361  1.00  1.39           C  
ATOM     27  C   LEU A   8      -8.822  -7.353   6.035  1.00  1.44           C  
ATOM     28  O   LEU A   8      -8.604  -7.538   7.231  1.00  1.60           O  
ATOM     29  N   THR A   9      -9.118  -8.322   5.152  1.00  1.41           N  
ATOM     30  CA  THR A   9      -9.389  -9.688   5.478  1.00  1.51           C  
ATOM     31  C   THR A   9      -8.214 -10.455   5.979  1.00  1.37           C  
ATOM     32  O   THR A   9      -8.303 -11.612   6.388  1.00  1.62           O  
ATOM     33  N   GLY A  10      -6.993  -9.890   5.973  1.00  1.18           N  
ATOM     34  CA  GLY A  10      -5.822 -10.470   6.554  1.00  1.22           C  
ATOM     35  C   GLY A  10      -4.969 -11.088   5.499  1.00  0.99           C  
ATOM     36  O   GLY A  10      -3.977 -11.756   5.780  1.00  1.31           O  
ATOM     37  N   LYS A  11      -5.303 -10.837   4.220  1.00  0.73           N  
ATOM     38  CA  LYS A  11      -4.693 -11.503   3.111  1.00  0.60           C  
ATOM     39  C   LYS A  11      -3.428 -10.782   2.796  1.00  0.51           C  
ATOM     40  O   LYS A  11      -3.416  -9.581   2.533  1.00  0.63           O  
ATOM     41  N   THR A  12      -2.326 -11.552   2.744  1.00  0.49           N  
ATOM     42  CA  THR A  12      -1.030 -11.024   2.446  1.00  0.48           C  
ATOM     43  C   THR A  12      -0.699 -11.118   0.996  1.00  0.52           C  
ATOM     44  O   THR A  12      -0.817 -12.182   0.392  1.00  0.72           O  
ATOM     45  N   ILE A  13      -0.418  -9.955   0.381  1.00  0.48           N  
ATOM     46  CA  ILE A  13      -0.074  -9.850  -1.003  1.00  0.55           C  
ATOM     47  C   ILE A  13       1.333  -9.361  -1.068  1.00  0.51           C  
ATOM     48  O   ILE A  13       1.653  -8.292  -0.552  1.00  0.56           O  
ATOM     49  N   THR A  14       2.222 -10.066  -1.790  1.00  0.55           N  
ATOM     50  CA  THR A  14       3.601  -9.690  -1.817  1.00  0.54           C  
ATOM     51  C   THR A  14       3.998  -8.973  -3.062  1.00  0.55           C  
ATOM     52  O   THR A  14       3.844  -9.478  -4.172  1.00  0.72           O  
ATOM     53  N   LEU A  15       4.523  -7.737  -2.990  1.00  0.50           N  
ATOM     54  CA  LEU A  15       4.822  -6.936  -4.137  1.00  0.55           C  
ATOM     55  C   LEU A  15       6.289  -6.694  -4.237  1.00  0.52           C  
ATOM     56  O   LEU A  15       6.950  -6.682  -3.200  1.00  0.58           O  
ATOM     57  N   GLU A  16       6.772  -6.429  -5.464  1.00  0.59           N  
ATOM     58  CA  GLU A  16       8.125  -6.007  -5.646  1.00  0.63           C  
ATOM     59  C   GLU A  16       8.169  -4.577  -6.065  1.00  0.65           C  
ATOM     60  O   GLU A  16       7.843  -4.262  -7.208  1.00  0.81           O  
ATOM     61  N   VAL A  17       8.633  -3.705  -5.152  1.00  0.61           N  
ATOM     62  CA  VAL A  17       8.679  -2.283  -5.290  1.00  0.63           C  
ATOM     63  C   VAL A  17      10.076  -1.800  -5.097  1.00  0.65           C  
ATOM     64  O   VAL A  17      10.942  -2.598  -4.740  1.00  0.76           O  
ATOM     65  N   GLU A  18      10.279  -0.492  -5.338  1.00  0.68           N  
ATOM     66  CA  GLU A  18      11.443   0.248  -4.964  1.00  0.74           C  
ATOM     67  C   GLU A  18      11.167   1.324  -3.970  1.00  0.71           C  
ATOM     68  O   GLU A  18       9.994   1.688  -3.905  1.00  0.74           O  
ATOM     69  N   PRO A  19      12.027   1.863  -3.158  1.00  0.74           N  
ATOM     70  CA  PRO A  19      11.700   2.845  -2.165  1.00  0.74           C  
ATOM     71  C   PRO A  19      11.584   4.245  -2.662  1.00  0.70           C  
ATOM     72  O   PRO A  19      11.244   5.131  -1.879  1.00  0.74           O  
ATOM     73  N   SER A  20      11.750   4.430  -3.984  1.00  0.70           N  
ATOM     74  CA  SER A  20      11.669   5.686  -4.663  1.00  0.74           C  
ATOM     75  C   SER A  20      10.343   5.992  -5.269  1.00  0.71           C  
ATOM     76  O   SER A  20      10.071   7.170  -5.493  1.00  0.80           O  
ATOM     77  N   ASP A  21       9.528   4.980  -5.617  1.00  0.70           N  
ATOM     78  CA  ASP A  21       8.218   5.031  -6.188  1.00  0.73           C  
ATOM     79  C   ASP A  21       7.195   5.536  -5.230  1.00  0.64           C  
ATOM     80  O   ASP A  21       7.250   5.350  -4.016  1.00  0.66           O  
ATOM     81  N   THR A  22       6.140   6.089  -5.855  1.00  0.63           N  
ATOM     82  CA  THR A  22       5.031   6.737  -5.226  1.00  0.58           C  
ATOM     83  C   THR A  22       4.002   5.778  -4.733  1.00  0.53           C  
ATOM     84  O   THR A  22       3.888   4.653  -5.217  1.00  0.58           O  
ATOM     85  N   ILE A  23       3.309   6.149  -3.642  1.00  0.51           N  
ATOM     86  CA  ILE A  23       2.171   5.441  -3.143  1.00  0.48           C  
ATOM     87  C   ILE A  23       1.130   5.220  -4.185  1.00  0.48           C  
ATOM     88  O   ILE A  23       0.663   4.086  -4.293  1.00  0.51           O  
ATOM     89  N   GLU A  24       0.780   6.212  -5.023  1.00  0.50           N  
ATOM     90  CA  GLU A  24       0.076   6.120  -6.264  1.00  0.53           C  
ATOM     91  C   GLU A  24       0.575   4.987  -7.092  1.00  0.50           C  
ATOM     92  O   GLU A  24      -0.288   4.255  -7.575  1.00  0.55           O  
ATOM     93  N   ASN A  25       1.888   4.836  -7.340  1.00  0.51           N  
ATOM     94  CA  ASN A  25       2.445   3.783  -8.130  1.00  0.52           C  
ATOM     95  C   ASN A  25       2.317   2.409  -7.570  1.00  0.47           C  
ATOM     96  O   ASN A  25       1.985   1.459  -8.279  1.00  0.53           O  
ATOM     97  N   VAL A  26       2.441   2.296  -6.235  1.00  0.45           N  
ATOM     98  CA  VAL A  26       2.309   1.107  -5.453  1.00  0.44           C  
ATOM     99  C   VAL A  26       0.925   0.554  -5.429  1.00  0.40           C  
ATOM    100  O   VAL A  26       0.615  -0.622  -5.612  1.00  0.44           O  
ATOM    101  N   LYS A  27      -0.040   1.465  -5.214  1.00  0.40           N  
ATOM    102  CA  LYS A  27      -1.440   1.250  -5.414  1.00  0.41           C  
ATOM    103  C   LYS A  27      -1.823   0.739  -6.759  1.00  0.38           C  
ATOM    104  O   LYS A  27      -2.595  -0.215  -6.849  1.00  0.42           O  
ATOM    105  N   ALA A  28      -1.051   1.121  -7.791  1.00  0.39           N  
ATOM    106  CA  ALA A  28      -1.298   0.601  -9.100  1.00  0.39           C  
ATOM    107  C   ALA A  28      -0.863  -0.819  -9.238  1.00  0.36           C  
ATOM    108  O   ALA A  28      -1.460  -1.581  -9.995  1.00  0.42           O  
ATOM    109  N   LYS A  29       0.039  -1.327  -8.381  1.00  0.39           N  
ATOM    110  CA  LYS A  29       0.432  -2.701  -8.320  1.00  0.43           C  
ATOM    111  C   LYS A  29      -0.615  -3.618  -7.791  1.00  0.44           C  
ATOM    112  O   LYS A  29      -0.736  -4.779  -8.181  1.00  0.54           O  
ATOM    113  N   ILE A  30      -1.382  -3.178  -6.777  1.00  0.41           N  
ATOM    114  CA  ILE A  30      -2.560  -3.798  -6.255  1.00  0.44           C  
ATOM    115  C   ILE A  30      -3.695  -3.738  -7.218  1.00  0.45           C  
ATOM    116  O   ILE A  30      -4.500  -4.666  -7.292  1.00  0.56           O  
ATOM    117  N   GLN A  31      -3.884  -2.732  -8.091  1.00  0.41           N  
ATOM    118  CA  GLN A  31      -4.848  -2.580  -9.137  1.00  0.48           C  
ATOM    119  C   GLN A  31      -4.614  -3.597 -10.201  1.00  0.52           C  
ATOM    120  O   GLN A  31      -5.456  -4.378 -10.639  1.00  0.66           O  
ATOM    121  N   ASP A  32      -3.396  -3.722 -10.755  1.00  0.50           N  
ATOM    122  CA  ASP A  32      -3.032  -4.792 -11.633  1.00  0.60           C  
ATOM    123  C   ASP A  32      -3.265  -6.087 -10.933  1.00  0.65           C  
ATOM    124  O   ASP A  32      -3.995  -6.881 -11.524  1.00  0.81           O  
ATOM    125  N   LYS A  33      -2.848  -6.334  -9.679  1.00  0.62           N  
ATOM    126  CA  LYS A  33      -2.945  -7.550  -8.931  1.00  0.73           C  
ATOM    127  C   LYS A  33      -4.311  -8.019  -8.566  1.00  0.69           C  
ATOM    128  O   LYS A  33      -4.772  -9.067  -9.015  1.00  0.83           O  
ATOM    129  N   GLU A  34      -5.064  -7.254  -7.753  1.00  0.63           N  
ATOM    130  CA  GLU A  34      -6.339  -7.624  -7.223  1.00  0.67           C  
ATOM    131  C   GLU A  34      -7.454  -7.133  -8.081  1.00  0.69           C  
ATOM    132  O   GLU A  34      -8.394  -7.894  -8.307  1.00  0.95           O  
ATOM    133  N   GLY A  35      -7.407  -5.881  -8.568  1.00  0.63           N  
ATOM    134  CA  GLY A  35      -8.442  -5.313  -9.375  1.00  0.68           C  
ATOM    135  C   GLY A  35      -9.345  -4.579  -8.444  1.00  0.76           C  
ATOM    136  O   GLY A  35     -10.444  -4.967  -8.049  1.00  1.12           O  
ATOM    137  N   ILE A  36      -8.861  -3.364  -8.130  1.00  0.70           N  
ATOM    138  CA  ILE A  36      -9.356  -2.467  -7.133  1.00  0.76           C  
ATOM    139  C   ILE A  36      -8.844  -1.186  -7.696  1.00  0.71           C  
ATOM    140  O   ILE A  36      -7.669  -1.176  -8.058  1.00  0.73           O  
ATOM    141  N   PRO A  37      -9.611  -0.161  -7.921  1.00  0.75           N  
ATOM    142  CA  PRO A  37      -9.036   1.030  -8.476  1.00  0.79           C  
ATOM    143  C   PRO A  37      -8.147   1.732  -7.507  1.00  0.75           C  
ATOM    144  O   PRO A  37      -8.503   1.717  -6.330  1.00  0.75           O  
ATOM    145  N   PRO A  38      -7.095   2.435  -7.806  1.00  0.81           N  
ATOM    146  CA  PRO A  38      -6.234   3.003  -6.809  1.00  0.85           C  
ATOM    147  C   PRO A  38      -6.829   4.093  -5.987  1.00  0.89           C  
ATOM    148  O   PRO A  38      -6.272   4.362  -4.923  1.00  0.99           O  
ATOM    149  N   ASP A  39      -7.898   4.764  -6.451  1.00  0.96           N  
ATOM    150  CA  ASP A  39      -8.694   5.769  -5.818  1.00  1.11           C  
ATOM    151  C   ASP A  39      -9.423   5.285  -4.611  1.00  1.00           C  
ATOM    152  O   ASP A  39      -9.463   5.875  -3.534  1.00  1.14           O  
ATOM    153  N   GLN A  40      -9.775   3.988  -4.670  1.00  0.87           N  
ATOM    154  CA  GLN A  40     -10.431   3.348  -3.571  1.00  0.84           C  
ATOM    155  C   GLN A  40      -9.364   2.806  -2.685  1.00  0.67           C  
ATOM    156  O   GLN A  40      -9.540   2.535  -1.497  1.00  0.80           O  
ATOM    157  N   GLN A  41      -8.102   2.655  -3.124  1.00  0.56           N  
ATOM    158  CA  GLN A  41      -7.131   2.058  -2.260  1.00  0.51           C  
ATOM    159  C   GLN A  41      -6.462   3.075  -1.400  1.00  0.49           C  
ATOM    160  O   GLN A  41      -5.949   4.078  -1.890  1.00  0.65           O  
ATOM    161  N   ARG A  42      -6.509   2.866  -0.072  1.00  0.47           N  
ATOM    162  CA  ARG A  42      -5.772   3.663   0.859  1.00  0.55           C  
ATOM    163  C   ARG A  42      -4.789   2.789   1.556  1.00  0.46           C  
ATOM    164  O   ARG A  42      -5.139   1.656   1.885  1.00  0.52           O  
ATOM    165  N   LEU A  43      -3.510   3.178   1.711  1.00  0.46           N  
ATOM    166  CA  LEU A  43      -2.471   2.452   2.371  1.00  0.42           C  
ATOM    167  C   LEU A  43      -2.093   3.177   3.616  1.00  0.43           C  
ATOM    168  O   LEU A  43      -1.762   4.359   3.697  1.00  0.55           O  
ATOM    169  N   ILE A  44      -2.156   2.428   4.732  1.00  0.42           N  
ATOM    170  CA  ILE A  44      -1.792   2.813   6.060  1.00  0.46           C  
ATOM    171  C   ILE A  44      -0.573   2.013   6.367  1.00  0.42           C  
ATOM    172  O   ILE A  44      -0.399   0.851   6.001  1.00  0.53           O  
ATOM    173  N   PHE A  45       0.386   2.559   7.136  1.00  0.42           N  
ATOM    174  CA  PHE A  45       1.583   1.883   7.530  1.00  0.46           C  
ATOM    175  C   PHE A  45       1.840   2.557   8.833  1.00  0.68           C  
ATOM    176  O   PHE A  45       1.741   3.782   8.876  1.00  1.50           O  
ATOM    177  N   ALA A  46       2.195   1.863   9.929  1.00  0.81           N  
ATOM    178  CA  ALA A  46       2.549   2.367  11.220  1.00  0.96           C  
ATOM    179  C   ALA A  46       1.586   3.363  11.767  1.00  0.97           C  
ATOM    180  O   ALA A  46       1.870   4.481  12.196  1.00  1.21           O  
ATOM    181  N   GLY A  47       0.292   3.007  11.686  1.00  0.99           N  
ATOM    182  CA  GLY A  47      -0.840   3.707  12.207  1.00  1.10           C  
ATOM    183  C   GLY A  47      -1.268   4.915  11.447  1.00  1.03           C  
ATOM    184  O   GLY A  47      -2.288   5.535  11.741  1.00  1.30           O  
ATOM    185  N   LYS A  48      -0.551   5.290  10.373  1.00  0.98           N  
ATOM    186  CA  LYS A  48      -0.731   6.474   9.591  1.00  1.05           C  
ATOM    187  C   LYS A  48      -0.952   6.221   8.140  1.00  0.84           C  
ATOM    188  O   LYS A  48      -0.278   5.414   7.503  1.00  0.81           O  
ATOM    189  N   GLN A  49      -1.826   7.099   7.616  1.00  0.84           N  
ATOM    190  CA  GLN A  49      -2.159   7.270   6.235  1.00  0.80           C  
ATOM    191  C   GLN A  49      -1.052   7.784   5.382  1.00  0.72           C  
ATOM    192  O   GLN A  49      -0.296   8.690   5.728  1.00  0.83           O  
ATOM    193  N   LEU A  50      -0.871   6.979   4.318  1.00  0.69           N  
ATOM    194  CA  LEU A  50       0.142   7.217   3.339  1.00  0.66           C  
ATOM    195  C   LEU A  50      -0.448   8.034   2.241  1.00  0.72           C  
ATOM    196  O   LEU A  50      -1.373   7.569   1.577  1.00  0.90           O  
ATOM    197  N   GLU A  51       0.072   9.242   1.960  1.00  0.70           N  
ATOM    198  CA  GLU A  51      -0.440  10.030   0.884  1.00  0.76           C  
ATOM    199  C   GLU A  51       0.023   9.572  -0.457  1.00  0.77           C  
ATOM    200  O   GLU A  51       1.137   9.054  -0.519  1.00  1.23           O  
ATOM    201  N   ASP A  52      -0.765   9.783  -1.526  1.00  0.66           N  
ATOM    202  CA  ASP A  52      -0.537   9.218  -2.820  1.00  0.65           C  
ATOM    203  C   ASP A  52       0.599   9.773  -3.608  1.00  0.60           C  
ATOM    204  O   ASP A  52       1.411   8.970  -4.066  1.00  0.62           O  
ATOM    205  N   GLY A  53       0.657  11.101  -3.809  1.00  0.68           N  
ATOM    206  CA  GLY A  53       1.823  11.727  -4.351  1.00  0.73           C  
ATOM    207  C   GLY A  53       3.061  11.848  -3.530  1.00  0.72           C  
ATOM    208  O   GLY A  53       3.891  12.697  -3.853  1.00  0.97           O  
ATOM    209  N   ARG A  54       3.337  10.934  -2.583  1.00  0.64           N  
ATOM    210  CA  ARG A  54       4.594  10.890  -1.902  1.00  0.63           C  
ATOM    211  C   ARG A  54       5.241   9.581  -2.197  1.00  0.59           C  
ATOM    212  O   ARG A  54       4.608   8.722  -2.811  1.00  0.62           O  
ATOM    213  N   THR A  55       6.487   9.367  -1.737  1.00  0.63           N  
ATOM    214  CA  THR A  55       7.094   8.086  -1.929  1.00  0.61           C  
ATOM    215  C   THR A  55       7.100   7.287  -0.671  1.00  0.59           C  
ATOM    216  O   THR A  55       6.786   7.693   0.447  1.00  0.64           O  
ATOM    217  N   LEU A  56       7.632   6.054  -0.733  1.00  0.58           N  
ATOM    218  CA  LEU A  56       7.923   5.142   0.330  1.00  0.59           C  
ATOM    219  C   LEU A  56       9.081   5.565   1.166  1.00  0.64           C  
ATOM    220  O   LEU A  56       9.173   5.378   2.378  1.00  0.70           O  
ATOM    221  N   SER A  57      10.063   6.210   0.510  1.00  0.68           N  
ATOM    222  CA  SER A  57      11.237   6.799   1.073  1.00  0.75           C  
ATOM    223  C   SER A  57      10.862   7.808   2.102  1.00  0.76           C  
ATOM    224  O   SER A  57      11.360   7.898   3.223  1.00  0.84           O  
ATOM    225  N   ASP A  58       9.868   8.654   1.775  1.00  0.75           N  
ATOM    226  CA  ASP A  58       9.274   9.660   2.599  1.00  0.78           C  
ATOM    227  C   ASP A  58       8.727   9.227   3.916  1.00  0.77           C  
ATOM    228  O   ASP A  58       8.788   9.961   4.899  1.00  0.86           O  
ATOM    229  N   TYR A  59       8.185   8.000   4.021  1.00  0.72           N  
ATOM    230  CA  TYR A  59       7.622   7.474   5.226  1.00  0.73           C  
ATOM    231  C   TYR A  59       8.603   6.550   5.861  1.00  0.76           C  
ATOM    232  O   TYR A  59       8.288   5.934   6.878  1.00  0.89           O  
ATOM    233  N   ASN A  60       9.758   6.341   5.205  1.00  0.74           N  
ATOM    234  CA  ASN A  60      10.799   5.463   5.643  1.00  0.79           C  
ATOM    235  C   ASN A  60      10.471   4.011   5.708  1.00  0.75           C  
ATOM    236  O   ASN A  60      10.617   3.311   6.708  1.00  0.86           O  
ATOM    237  N   ILE A  61      10.015   3.576   4.520  1.00  0.67           N  
ATOM    238  CA  ILE A  61       9.608   2.214   4.361  1.00  0.65           C  
ATOM    239  C   ILE A  61      10.726   1.487   3.698  1.00  0.66           C  
ATOM    240  O   ILE A  61      11.308   2.003   2.744  1.00  0.75           O  
ATOM    241  N   GLN A  62      11.089   0.314   4.247  1.00  0.67           N  
ATOM    242  CA  GLN A  62      12.185  -0.472   3.774  1.00  0.70           C  
ATOM    243  C   GLN A  62      11.728  -1.785   3.238  1.00  0.62           C  
ATOM    244  O   GLN A  62      10.534  -1.958   2.998  1.00  0.64           O  
ATOM    245  N   LYS A  63      12.621  -2.772   3.049  1.00  0.64           N  
ATOM    246  CA  LYS A  63      12.374  -4.108   2.602  1.00  0.62           C  
ATOM    247  C   LYS A  63      11.604  -4.825   3.656  1.00  0.59           C  
ATOM    248  O   LYS A  63      11.725  -4.491   4.834  1.00  0.66           O  
ATOM    249  N   GLU A  64      10.822  -5.839   3.243  1.00  0.57           N  
ATOM    250  CA  GLU A  64      10.040  -6.738   4.033  1.00  0.58           C  
ATOM    251  C   GLU A  64       9.065  -6.133   4.985  1.00  0.56           C  
ATOM    252  O   GLU A  64       8.747  -6.700   6.029  1.00  0.70           O  
ATOM    253  N   SER A  65       8.570  -4.917   4.694  1.00  0.51           N  
ATOM    254  CA  SER A  65       7.740  -4.168   5.587  1.00  0.51           C  
ATOM    255  C   SER A  65       6.305  -4.423   5.282  1.00  0.43           C  
ATOM    256  O   SER A  65       5.944  -4.591   4.118  1.00  0.50           O  
ATOM    257  N   THR A  66       5.420  -4.458   6.294  1.00  0.45           N  
ATOM    258  CA  THR A  66       4.051  -4.861   6.214  1.00  0.45           C  
ATOM    259  C   THR A  66       3.132  -3.688   6.204  1.00  0.43           C  
ATOM    260  O   THR A  66       2.801  -3.097   7.232  1.00  0.58           O  
ATOM    261  N   LEU A  67       2.588  -3.337   5.026  1.00  0.38           N  
ATOM    262  CA  LEU A  67       1.634  -2.294   4.811  1.00  0.38           C  
ATOM    263  C   LEU A  67       0.241  -2.757   5.071  1.00  0.37           C  
ATOM    264  O   LEU A  67      -0.071  -3.945   5.036  1.00  0.50           O  
ATOM    265  N   HIS A  68      -0.721  -1.847   5.304  1.00  0.35           N  
ATOM    266  CA  HIS A  68      -2.095  -2.143   5.567  1.00  0.37           C  
ATOM    267  C   HIS A  68      -2.837  -1.388   4.517  1.00  0.35           C  
ATOM    268  O   HIS A  68      -2.749  -0.176   4.332  1.00  0.48           O  
ATOM    269  N   LEU A  69      -3.649  -2.149   3.762  1.00  0.36           N  
ATOM    270  CA  LEU A  69      -4.546  -1.733   2.729  1.00  0.38           C  
ATOM    271  C   LEU A  69      -5.913  -1.571   3.299  1.00  0.41           C  
ATOM    272  O   LEU A  69      -6.432  -2.589   3.755  1.00  0.56           O  
ATOM    273  N   VAL A  70      -6.559  -0.393   3.243  1.00  0.45           N  
ATOM    274  CA  VAL A  70      -7.935  -0.131   3.532  1.00  0.56           C  
ATOM    275  C   VAL A  70      -8.660   0.362   2.327  1.00  0.55           C  
ATOM    276  O   VAL A  70      -7.984   0.774   1.385  1.00  0.58           O  
TER
ENDMDL
MODEL      17
ATOM      1  N   GLN A   2      10.816  -6.645  -1.339  1.00  0.59           N  
ATOM      2  CA  GLN A   2       9.515  -7.194  -1.112  1.00  0.56           C  
ATOM      3  C   GLN A   2       8.740  -6.455  -0.076  1.00  0.50           C  
ATOM      4  O   GLN A   2       9.062  -6.527   1.109  1.00  0.60           O  
ATOM      5  N   ILE A   3       7.615  -5.815  -0.444  1.00  0.44           N  
ATOM      6  CA  ILE A   3       6.719  -5.377   0.580  1.00  0.42           C  
ATOM      7  C   ILE A   3       5.499  -6.226   0.689  1.00  0.40           C  
ATOM      8  O   ILE A   3       5.050  -6.917  -0.224  1.00  0.50           O  
ATOM      9  N   PHE A   4       4.844  -6.340   1.858  1.00  0.37           N  
ATOM     10  CA  PHE A   4       3.732  -7.194   2.135  1.00  0.38           C  
ATOM     11  C   PHE A   4       2.522  -6.350   2.344  1.00  0.39           C  
ATOM     12  O   PHE A   4       2.512  -5.550   3.279  1.00  0.60           O  
ATOM     13  N   VAL A   5       1.499  -6.406   1.472  1.00  0.35           N  
ATOM     14  CA  VAL A   5       0.333  -5.588   1.593  1.00  0.35           C  
ATOM     15  C   VAL A   5      -0.700  -6.437   2.252  1.00  0.35           C  
ATOM     16  O   VAL A   5      -1.213  -7.427   1.732  1.00  0.46           O  
ATOM     17  N   LYS A   6      -0.981  -6.162   3.538  1.00  0.36           N  
ATOM     18  CA  LYS A   6      -1.961  -6.850   4.320  1.00  0.39           C  
ATOM     19  C   LYS A   6      -3.284  -6.163   4.322  1.00  0.46           C  
ATOM     20  O   LYS A   6      -3.443  -5.038   4.793  1.00  0.53           O  
ATOM     21  N   THR A   7      -4.335  -6.868   3.866  1.00  0.58           N  
ATOM     22  CA  THR A   7      -5.657  -6.330   3.940  1.00  0.78           C  
ATOM     23  C   THR A   7      -6.246  -6.721   5.252  1.00  0.94           C  
ATOM     24  O   THR A   7      -5.796  -7.701   5.844  1.00  0.99           O  
ATOM     25  N   LEU A   8      -7.336  -6.028   5.628  1.00  1.17           N  
ATOM     26  CA  LEU A   8      -8.238  -6.144   6.732  1.00  1.39           C  
ATOM     27  C   LEU A   8      -8.625  -7.565   6.953  1.00  1.44           C  
ATOM     28  O   LEU A   8      -8.466  -8.189   8.001  1.00  1.60           O  
ATOM     29  N   THR A   9      -9.176  -8.136   5.867  1.00  1.41           N  
ATOM     30  CA  THR A   9      -9.726  -9.455   5.880  1.00  1.51           C  
ATOM     31  C   THR A   9      -8.728 -10.560   5.947  1.00  1.37           C  
ATOM     32  O   THR A   9      -9.062 -11.732   6.120  1.00  1.62           O  
ATOM     33  N   GLY A  10      -7.489 -10.199   5.570  1.00  1.18           N  
ATOM     34  CA  GLY A  10      -6.398 -11.074   5.869  1.00  1.22           C  
ATOM     35  C   GLY A  10      -5.411 -11.309   4.779  1.00  0.99           C  
ATOM     36  O   GLY A  10      -4.345 -11.840   5.088  1.00  1.31           O  
ATOM     37  N   LYS A  11      -5.705 -10.969   3.511  1.00  0.73           N  
ATOM     38  CA  LYS A  11      -4.890 -11.392   2.414  1.00  0.60           C  
ATOM     39  C   LYS A  11      -3.641 -10.581   2.405  1.00  0.51           C  
ATOM     40  O   LYS A  11      -3.651  -9.384   2.692  1.00  0.63           O  
ATOM     41  N   THR A  12      -2.498 -11.273   2.252  1.00  0.49           N  
ATOM     42  CA  THR A  12      -1.242 -10.611   2.077  1.00  0.48           C  
ATOM     43  C   THR A  12      -0.831 -10.719   0.650  1.00  0.52           C  
ATOM     44  O   THR A  12      -0.657 -11.815   0.118  1.00  0.72           O  
ATOM     45  N   ILE A  13      -0.694  -9.545   0.008  1.00  0.48           N  
ATOM     46  CA  ILE A  13      -0.347  -9.322  -1.360  1.00  0.55           C  
ATOM     47  C   ILE A  13       1.069  -8.858  -1.334  1.00  0.51           C  
ATOM     48  O   ILE A  13       1.478  -7.802  -0.850  1.00  0.56           O  
ATOM     49  N   THR A  14       1.969  -9.703  -1.867  1.00  0.55           N  
ATOM     50  CA  THR A  14       3.385  -9.502  -1.890  1.00  0.54           C  
ATOM     51  C   THR A  14       3.694  -8.745  -3.136  1.00  0.55           C  
ATOM     52  O   THR A  14       3.218  -9.204  -4.173  1.00  0.72           O  
ATOM     53  N   LEU A  15       4.485  -7.659  -3.073  1.00  0.50           N  
ATOM     54  CA  LEU A  15       4.775  -6.893  -4.245  1.00  0.55           C  
ATOM     55  C   LEU A  15       6.229  -6.569  -4.289  1.00  0.52           C  
ATOM     56  O   LEU A  15       6.809  -6.003  -3.362  1.00  0.58           O  
ATOM     57  N   GLU A  16       6.897  -6.799  -5.432  1.00  0.59           N  
ATOM     58  CA  GLU A  16       8.273  -6.473  -5.648  1.00  0.63           C  
ATOM     59  C   GLU A  16       8.456  -5.087  -6.165  1.00  0.65           C  
ATOM     60  O   GLU A  16       8.311  -4.833  -7.359  1.00  0.81           O  
ATOM     61  N   VAL A  17       8.694  -4.148  -5.232  1.00  0.61           N  
ATOM     62  CA  VAL A  17       8.840  -2.772  -5.594  1.00  0.63           C  
ATOM     63  C   VAL A  17      10.276  -2.449  -5.360  1.00  0.65           C  
ATOM     64  O   VAL A  17      11.073  -3.229  -4.843  1.00  0.76           O  
ATOM     65  N   GLU A  18      10.673  -1.201  -5.665  1.00  0.68           N  
ATOM     66  CA  GLU A  18      11.875  -0.624  -5.146  1.00  0.74           C  
ATOM     67  C   GLU A  18      11.555   0.631  -4.410  1.00  0.71           C  
ATOM     68  O   GLU A  18      10.619   1.320  -4.815  1.00  0.74           O  
ATOM     69  N   PRO A  19      12.373   1.040  -3.487  1.00  0.74           N  
ATOM     70  CA  PRO A  19      12.056   2.053  -2.522  1.00  0.74           C  
ATOM     71  C   PRO A  19      12.006   3.421  -3.110  1.00  0.70           C  
ATOM     72  O   PRO A  19      11.464   4.311  -2.458  1.00  0.74           O  
ATOM     73  N   SER A  20      12.674   3.677  -4.249  1.00  0.70           N  
ATOM     74  CA  SER A  20      12.652   4.973  -4.855  1.00  0.74           C  
ATOM     75  C   SER A  20      11.391   5.351  -5.552  1.00  0.71           C  
ATOM     76  O   SER A  20      11.159   6.536  -5.783  1.00  0.80           O  
ATOM     77  N   ASP A  21      10.438   4.433  -5.789  1.00  0.70           N  
ATOM     78  CA  ASP A  21       9.163   4.745  -6.358  1.00  0.73           C  
ATOM     79  C   ASP A  21       8.082   5.277  -5.481  1.00  0.64           C  
ATOM     80  O   ASP A  21       8.066   5.010  -4.281  1.00  0.66           O  
ATOM     81  N   THR A  22       7.075   5.944  -6.073  1.00  0.63           N  
ATOM     82  CA  THR A  22       5.977   6.571  -5.405  1.00  0.58           C  
ATOM     83  C   THR A  22       4.852   5.727  -4.912  1.00  0.53           C  
ATOM     84  O   THR A  22       4.582   4.742  -5.598  1.00  0.58           O  
ATOM     85  N   ILE A  23       4.133   6.006  -3.811  1.00  0.51           N  
ATOM     86  CA  ILE A  23       2.962   5.311  -3.373  1.00  0.48           C  
ATOM     87  C   ILE A  23       1.867   5.188  -4.375  1.00  0.48           C  
ATOM     88  O   ILE A  23       1.244   4.138  -4.518  1.00  0.51           O  
ATOM     89  N   GLU A  24       1.679   6.270  -5.153  1.00  0.50           N  
ATOM     90  CA  GLU A  24       0.962   6.275  -6.390  1.00  0.53           C  
ATOM     91  C   GLU A  24       1.230   5.195  -7.381  1.00  0.50           C  
ATOM     92  O   GLU A  24       0.348   4.685  -8.069  1.00  0.55           O  
ATOM     93  N   ASN A  25       2.504   4.782  -7.511  1.00  0.51           N  
ATOM     94  CA  ASN A  25       2.939   3.705  -8.346  1.00  0.52           C  
ATOM     95  C   ASN A  25       2.841   2.367  -7.698  1.00  0.47           C  
ATOM     96  O   ASN A  25       2.700   1.349  -8.375  1.00  0.53           O  
ATOM     97  N   VAL A  26       2.846   2.253  -6.358  1.00  0.45           N  
ATOM     98  CA  VAL A  26       2.678   1.032  -5.630  1.00  0.44           C  
ATOM     99  C   VAL A  26       1.255   0.595  -5.709  1.00  0.40           C  
ATOM    100  O   VAL A  26       0.921  -0.544  -6.032  1.00  0.44           O  
ATOM    101  N   LYS A  27       0.281   1.488  -5.460  1.00  0.40           N  
ATOM    102  CA  LYS A  27      -1.131   1.300  -5.578  1.00  0.41           C  
ATOM    103  C   LYS A  27      -1.694   0.676  -6.809  1.00  0.38           C  
ATOM    104  O   LYS A  27      -2.671  -0.068  -6.876  1.00  0.42           O  
ATOM    105  N   ALA A  28      -1.113   0.991  -7.980  1.00  0.39           N  
ATOM    106  CA  ALA A  28      -1.352   0.600  -9.335  1.00  0.39           C  
ATOM    107  C   ALA A  28      -0.967  -0.824  -9.549  1.00  0.36           C  
ATOM    108  O   ALA A  28      -1.625  -1.474 -10.359  1.00  0.42           O  
ATOM    109  N   LYS A  29       0.067  -1.341  -8.862  1.00  0.39           N  
ATOM    110  CA  LYS A  29       0.380  -2.734  -8.934  1.00  0.43           C  
ATOM    111  C   LYS A  29      -0.621  -3.728  -8.455  1.00  0.44           C  
ATOM    112  O   LYS A  29      -0.673  -4.818  -9.021  1.00  0.54           O  
ATOM    113  N   ILE A  30      -1.469  -3.272  -7.517  1.00  0.41           N  
ATOM    114  CA  ILE A  30      -2.574  -4.004  -6.980  1.00  0.44           C  
ATOM    115  C   ILE A  30      -3.807  -3.954  -7.816  1.00  0.45           C  
ATOM    116  O   ILE A  30      -4.729  -4.764  -7.726  1.00  0.56           O  
ATOM    117  N   GLN A  31      -3.844  -2.986  -8.748  1.00  0.41           N  
ATOM    118  CA  GLN A  31      -4.964  -2.824  -9.623  1.00  0.48           C  
ATOM    119  C   GLN A  31      -4.765  -3.809 -10.723  1.00  0.52           C  
ATOM    120  O   GLN A  31      -5.731  -4.490 -11.066  1.00  0.66           O  
ATOM    121  N   ASP A  32      -3.596  -3.904 -11.381  1.00  0.50           N  
ATOM    122  CA  ASP A  32      -3.169  -4.942 -12.266  1.00  0.60           C  
ATOM    123  C   ASP A  32      -3.388  -6.288 -11.667  1.00  0.65           C  
ATOM    124  O   ASP A  32      -4.074  -7.140 -12.231  1.00  0.81           O  
ATOM    125  N   LYS A  33      -2.748  -6.590 -10.523  1.00  0.62           N  
ATOM    126  CA  LYS A  33      -2.657  -7.901  -9.959  1.00  0.73           C  
ATOM    127  C   LYS A  33      -3.912  -8.330  -9.280  1.00  0.69           C  
ATOM    128  O   LYS A  33      -4.541  -9.329  -9.629  1.00  0.83           O  
ATOM    129  N   GLU A  34      -4.408  -7.685  -8.210  1.00  0.63           N  
ATOM    130  CA  GLU A  34      -5.443  -8.219  -7.379  1.00  0.67           C  
ATOM    131  C   GLU A  34      -6.769  -7.651  -7.754  1.00  0.69           C  
ATOM    132  O   GLU A  34      -7.760  -8.369  -7.875  1.00  0.95           O  
ATOM    133  N   GLY A  35      -6.822  -6.332  -8.010  1.00  0.63           N  
ATOM    134  CA  GLY A  35      -8.012  -5.731  -8.530  1.00  0.68           C  
ATOM    135  C   GLY A  35      -8.668  -4.575  -7.858  1.00  0.76           C  
ATOM    136  O   GLY A  35      -9.867  -4.313  -7.935  1.00  1.12           O  
ATOM    137  N   ILE A  36      -7.839  -3.909  -7.034  1.00  0.70           N  
ATOM    138  CA  ILE A  36      -8.194  -2.830  -6.166  1.00  0.76           C  
ATOM    139  C   ILE A  36      -7.815  -1.533  -6.794  1.00  0.71           C  
ATOM    140  O   ILE A  36      -6.638  -1.313  -7.081  1.00  0.73           O  
ATOM    141  N   PRO A  37      -8.678  -0.608  -7.088  1.00  0.75           N  
ATOM    142  CA  PRO A  37      -8.209   0.576  -7.747  1.00  0.79           C  
ATOM    143  C   PRO A  37      -7.355   1.480  -6.926  1.00  0.75           C  
ATOM    144  O   PRO A  37      -7.543   1.510  -5.711  1.00  0.75           O  
ATOM    145  N   PRO A  38      -6.506   2.349  -7.387  1.00  0.81           N  
ATOM    146  CA  PRO A  38      -5.609   3.114  -6.572  1.00  0.85           C  
ATOM    147  C   PRO A  38      -6.301   4.189  -5.808  1.00  0.89           C  
ATOM    148  O   PRO A  38      -5.711   4.701  -4.857  1.00  0.99           O  
ATOM    149  N   ASP A  39      -7.543   4.581  -6.147  1.00  0.96           N  
ATOM    150  CA  ASP A  39      -8.384   5.517  -5.469  1.00  1.11           C  
ATOM    151  C   ASP A  39      -9.175   4.883  -4.378  1.00  1.00           C  
ATOM    152  O   ASP A  39      -9.469   5.476  -3.341  1.00  1.14           O  
ATOM    153  N   GLN A  40      -9.597   3.619  -4.561  1.00  0.87           N  
ATOM    154  CA  GLN A  40     -10.462   2.843  -3.727  1.00  0.84           C  
ATOM    155  C   GLN A  40      -9.727   2.284  -2.558  1.00  0.67           C  
ATOM    156  O   GLN A  40     -10.201   1.434  -1.806  1.00  0.80           O  
ATOM    157  N   GLN A  41      -8.437   2.643  -2.427  1.00  0.56           N  
ATOM    158  CA  GLN A  41      -7.680   2.158  -1.316  1.00  0.51           C  
ATOM    159  C   GLN A  41      -7.015   3.103  -0.375  1.00  0.49           C  
ATOM    160  O   GLN A  41      -6.616   4.123  -0.935  1.00  0.65           O  
ATOM    161  N   ARG A  42      -6.839   2.860   0.936  1.00  0.47           N  
ATOM    162  CA  ARG A  42      -6.123   3.795   1.746  1.00  0.55           C  
ATOM    163  C   ARG A  42      -5.052   2.970   2.370  1.00  0.46           C  
ATOM    164  O   ARG A  42      -5.235   1.910   2.967  1.00  0.52           O  
ATOM    165  N   LEU A  43      -3.772   3.378   2.310  1.00  0.46           N  
ATOM    166  CA  LEU A  43      -2.693   2.636   2.885  1.00  0.42           C  
ATOM    167  C   LEU A  43      -2.232   3.320   4.126  1.00  0.43           C  
ATOM    168  O   LEU A  43      -1.945   4.514   4.202  1.00  0.55           O  
ATOM    169  N   ILE A  44      -2.067   2.512   5.188  1.00  0.42           N  
ATOM    170  CA  ILE A  44      -1.566   2.960   6.449  1.00  0.46           C  
ATOM    171  C   ILE A  44      -0.320   2.183   6.706  1.00  0.42           C  
ATOM    172  O   ILE A  44      -0.267   0.968   6.517  1.00  0.53           O  
ATOM    173  N   PHE A  45       0.750   2.857   7.162  1.00  0.42           N  
ATOM    174  CA  PHE A  45       1.976   2.320   7.665  1.00  0.46           C  
ATOM    175  C   PHE A  45       2.114   2.918   9.023  1.00  0.68           C  
ATOM    176  O   PHE A  45       1.963   4.113   9.272  1.00  1.50           O  
ATOM    177  N   ALA A  46       2.416   2.046  10.001  1.00  0.81           N  
ATOM    178  CA  ALA A  46       2.595   2.291  11.399  1.00  0.96           C  
ATOM    179  C   ALA A  46       1.337   2.655  12.112  1.00  0.97           C  
ATOM    180  O   ALA A  46       0.981   2.093  13.146  1.00  1.21           O  
ATOM    181  N   GLY A  47       0.734   3.741  11.595  1.00  0.99           N  
ATOM    182  CA  GLY A  47      -0.412   4.393  12.148  1.00  1.10           C  
ATOM    183  C   GLY A  47      -1.052   5.415  11.272  1.00  1.03           C  
ATOM    184  O   GLY A  47      -2.217   5.802  11.354  1.00  1.30           O  
ATOM    185  N   LYS A  48      -0.206   6.082  10.466  1.00  0.98           N  
ATOM    186  CA  LYS A  48      -0.654   7.137   9.610  1.00  1.05           C  
ATOM    187  C   LYS A  48      -0.947   6.705   8.216  1.00  0.84           C  
ATOM    188  O   LYS A  48      -0.530   5.631   7.783  1.00  0.81           O  
ATOM    189  N   GLN A  49      -1.697   7.557   7.495  1.00  0.84           N  
ATOM    190  CA  GLN A  49      -1.911   7.295   6.105  1.00  0.80           C  
ATOM    191  C   GLN A  49      -0.992   7.830   5.061  1.00  0.72           C  
ATOM    192  O   GLN A  49      -0.531   8.968   5.133  1.00  0.83           O  
ATOM    193  N   LEU A  50      -0.760   7.084   3.967  1.00  0.69           N  
ATOM    194  CA  LEU A  50       0.240   7.389   2.990  1.00  0.66           C  
ATOM    195  C   LEU A  50      -0.289   8.212   1.867  1.00  0.72           C  
ATOM    196  O   LEU A  50      -1.299   7.940   1.219  1.00  0.90           O  
ATOM    197  N   GLU A  51       0.429   9.321   1.609  1.00  0.70           N  
ATOM    198  CA  GLU A  51       0.272  10.306   0.584  1.00  0.76           C  
ATOM    199  C   GLU A  51       0.762   9.774  -0.718  1.00  0.77           C  
ATOM    200  O   GLU A  51       1.762   9.064  -0.819  1.00  1.23           O  
ATOM    201  N   ASP A  52      -0.003   9.980  -1.806  1.00  0.66           N  
ATOM    202  CA  ASP A  52       0.172   9.460  -3.127  1.00  0.65           C  
ATOM    203  C   ASP A  52       1.476   9.785  -3.769  1.00  0.60           C  
ATOM    204  O   ASP A  52       2.112   8.855  -4.264  1.00  0.62           O  
ATOM    205  N   GLY A  53       1.880  11.068  -3.762  1.00  0.68           N  
ATOM    206  CA  GLY A  53       3.182  11.429  -4.230  1.00  0.73           C  
ATOM    207  C   GLY A  53       4.329  11.445  -3.280  1.00  0.72           C  
ATOM    208  O   GLY A  53       5.160  12.348  -3.369  1.00  0.97           O  
ATOM    209  N   ARG A  54       4.298  10.507  -2.317  1.00  0.64           N  
ATOM    210  CA  ARG A  54       5.522  10.359  -1.592  1.00  0.63           C  
ATOM    211  C   ARG A  54       6.174   9.118  -2.097  1.00  0.59           C  
ATOM    212  O   ARG A  54       5.496   8.287  -2.699  1.00  0.62           O  
ATOM    213  N   THR A  55       7.458   8.816  -1.838  1.00  0.63           N  
ATOM    214  CA  THR A  55       8.129   7.577  -2.080  1.00  0.61           C  
ATOM    215  C   THR A  55       8.007   6.687  -0.891  1.00  0.59           C  
ATOM    216  O   THR A  55       7.739   7.153   0.215  1.00  0.64           O  
ATOM    217  N   LEU A  56       8.212   5.380  -1.137  1.00  0.58           N  
ATOM    218  CA  LEU A  56       8.364   4.414  -0.093  1.00  0.59           C  
ATOM    219  C   LEU A  56       9.507   4.640   0.834  1.00  0.64           C  
ATOM    220  O   LEU A  56       9.432   4.454   2.047  1.00  0.70           O  
ATOM    221  N   SER A  57      10.638   5.194   0.360  1.00  0.68           N  
ATOM    222  CA  SER A  57      11.773   5.434   1.196  1.00  0.75           C  
ATOM    223  C   SER A  57      11.674   6.613   2.101  1.00  0.76           C  
ATOM    224  O   SER A  57      12.296   6.592   3.162  1.00  0.84           O  
ATOM    225  N   ASP A  58      10.794   7.591   1.815  1.00  0.75           N  
ATOM    226  CA  ASP A  58      10.445   8.652   2.707  1.00  0.78           C  
ATOM    227  C   ASP A  58       9.776   8.084   3.911  1.00  0.77           C  
ATOM    228  O   ASP A  58      10.139   8.422   5.037  1.00  0.86           O  
ATOM    229  N   TYR A  59       8.964   7.023   3.767  1.00  0.72           N  
ATOM    230  CA  TYR A  59       8.368   6.267   4.825  1.00  0.73           C  
ATOM    231  C   TYR A  59       9.288   5.239   5.387  1.00  0.76           C  
ATOM    232  O   TYR A  59       8.876   4.404   6.191  1.00  0.89           O  
ATOM    233  N   ASN A  60      10.554   5.137   4.945  1.00  0.74           N  
ATOM    234  CA  ASN A  60      11.458   4.122   5.388  1.00  0.79           C  
ATOM    235  C   ASN A  60      10.956   2.722   5.299  1.00  0.75           C  
ATOM    236  O   ASN A  60      11.306   1.843   6.083  1.00  0.86           O  
ATOM    237  N   ILE A  61      10.151   2.432   4.260  1.00  0.67           N  
ATOM    238  CA  ILE A  61       9.599   1.141   3.991  1.00  0.65           C  
ATOM    239  C   ILE A  61      10.696   0.220   3.581  1.00  0.66           C  
ATOM    240  O   ILE A  61      11.303   0.377   2.523  1.00  0.75           O  
ATOM    241  N   GLN A  62      11.090  -0.692   4.488  1.00  0.67           N  
ATOM    242  CA  GLN A  62      12.178  -1.615   4.405  1.00  0.70           C  
ATOM    243  C   GLN A  62      11.634  -2.927   3.953  1.00  0.62           C  
ATOM    244  O   GLN A  62      10.426  -3.145   3.886  1.00  0.64           O  
ATOM    245  N   LYS A  63      12.478  -3.893   3.548  1.00  0.64           N  
ATOM    246  CA  LYS A  63      11.890  -5.156   3.229  1.00  0.62           C  
ATOM    247  C   LYS A  63      11.189  -5.897   4.315  1.00  0.59           C  
ATOM    248  O   LYS A  63      11.444  -5.724   5.505  1.00  0.66           O  
ATOM    249  N   GLU A  64      10.124  -6.594   3.878  1.00  0.57           N  
ATOM    250  CA  GLU A  64       9.209  -7.253   4.756  1.00  0.58           C  
ATOM    251  C   GLU A  64       8.351  -6.288   5.501  1.00  0.56           C  
ATOM    252  O   GLU A  64       7.946  -6.619   6.615  1.00  0.70           O  
ATOM    253  N   SER A  65       8.039  -5.091   4.977  1.00  0.51           N  
ATOM    254  CA  SER A  65       7.236  -4.157   5.705  1.00  0.51           C  
ATOM    255  C   SER A  65       5.764  -4.354   5.583  1.00  0.43           C  
ATOM    256  O   SER A  65       5.279  -4.669   4.497  1.00  0.50           O  
ATOM    257  N   THR A  66       4.977  -4.167   6.658  1.00  0.45           N  
ATOM    258  CA  THR A  66       3.593  -4.522   6.597  1.00  0.45           C  
ATOM    259  C   THR A  66       2.843  -3.287   6.235  1.00  0.43           C  
ATOM    260  O   THR A  66       2.677  -2.442   7.114  1.00  0.58           O  
ATOM    261  N   LEU A  67       2.273  -3.128   5.027  1.00  0.38           N  
ATOM    262  CA  LEU A  67       1.407  -2.047   4.672  1.00  0.38           C  
ATOM    263  C   LEU A  67       0.013  -2.531   4.881  1.00  0.37           C  
ATOM    264  O   LEU A  67      -0.325  -3.609   4.394  1.00  0.50           O  
ATOM    265  N   HIS A  68      -0.809  -1.738   5.590  1.00  0.35           N  
ATOM    266  CA  HIS A  68      -2.144  -2.098   5.957  1.00  0.37           C  
ATOM    267  C   HIS A  68      -3.059  -1.417   4.998  1.00  0.35           C  
ATOM    268  O   HIS A  68      -3.172  -0.191   4.987  1.00  0.48           O  
ATOM    269  N   LEU A  69      -3.748  -2.240   4.188  1.00  0.36           N  
ATOM    270  CA  LEU A  69      -4.734  -1.846   3.231  1.00  0.38           C  
ATOM    271  C   LEU A  69      -6.097  -1.761   3.827  1.00  0.41           C  
ATOM    272  O   LEU A  69      -6.686  -2.788   4.161  1.00  0.56           O  
ATOM    273  N   VAL A  70      -6.577  -0.510   3.940  1.00  0.45           N  
ATOM    274  CA  VAL A  70      -7.935  -0.221   4.283  1.00  0.56           C  
ATOM    275  C   VAL A  70      -8.477   0.033   2.918  1.00  0.55           C  
ATOM    276  O   VAL A  70      -7.978   0.839   2.134  1.00  0.58           O  
TER
ENDMDL
MODEL      18
ATOM      1  N   GLN A   2      10.911  -6.382  -1.521  1.00  0.59           N  
ATOM      2  CA  GLN A   2       9.656  -7.045  -1.344  1.00  0.56           C  
ATOM      3  C   GLN A   2       8.939  -6.294  -0.276  1.00  0.50           C  
ATOM      4  O   GLN A   2       9.527  -5.778   0.674  1.00  0.60           O  
ATOM      5  N   ILE A   3       7.626  -6.037  -0.410  1.00  0.44           N  
ATOM      6  CA  ILE A   3       6.844  -5.536   0.678  1.00  0.42           C  
ATOM      7  C   ILE A   3       5.637  -6.409   0.715  1.00  0.40           C  
ATOM      8  O   ILE A   3       5.408  -7.167  -0.227  1.00  0.50           O  
ATOM      9  N   PHE A   4       4.866  -6.311   1.812  1.00  0.37           N  
ATOM     10  CA  PHE A   4       3.662  -7.053   2.024  1.00  0.38           C  
ATOM     11  C   PHE A   4       2.541  -6.093   2.235  1.00  0.39           C  
ATOM     12  O   PHE A   4       2.636  -5.190   3.066  1.00  0.60           O  
ATOM     13  N   VAL A   5       1.478  -6.234   1.425  1.00  0.35           N  
ATOM     14  CA  VAL A   5       0.285  -5.474   1.634  1.00  0.35           C  
ATOM     15  C   VAL A   5      -0.844  -6.304   2.139  1.00  0.35           C  
ATOM     16  O   VAL A   5      -1.330  -7.166   1.408  1.00  0.46           O  
ATOM     17  N   LYS A   6      -1.279  -6.096   3.395  1.00  0.36           N  
ATOM     18  CA  LYS A   6      -2.249  -6.911   4.057  1.00  0.39           C  
ATOM     19  C   LYS A   6      -3.545  -6.177   4.027  1.00  0.46           C  
ATOM     20  O   LYS A   6      -3.537  -4.983   4.321  1.00  0.53           O  
ATOM     21  N   THR A   7      -4.686  -6.869   3.855  1.00  0.58           N  
ATOM     22  CA  THR A   7      -5.971  -6.297   4.113  1.00  0.78           C  
ATOM     23  C   THR A   7      -6.458  -6.561   5.496  1.00  0.94           C  
ATOM     24  O   THR A   7      -6.051  -7.417   6.281  1.00  0.99           O  
ATOM     25  N   LEU A   8      -7.521  -5.831   5.878  1.00  1.17           N  
ATOM     26  CA  LEU A   8      -8.224  -5.959   7.117  1.00  1.39           C  
ATOM     27  C   LEU A   8      -9.054  -7.192   7.229  1.00  1.44           C  
ATOM     28  O   LEU A   8      -9.246  -7.756   8.306  1.00  1.60           O  
ATOM     29  N   THR A   9      -9.500  -7.764   6.097  1.00  1.41           N  
ATOM     30  CA  THR A   9     -10.302  -8.944   5.988  1.00  1.51           C  
ATOM     31  C   THR A   9      -9.485 -10.189   5.926  1.00  1.37           C  
ATOM     32  O   THR A   9      -9.923 -11.244   6.383  1.00  1.62           O  
ATOM     33  N   GLY A  10      -8.325 -10.126   5.250  1.00  1.18           N  
ATOM     34  CA  GLY A  10      -7.412 -11.211   5.435  1.00  1.22           C  
ATOM     35  C   GLY A  10      -6.441 -11.530   4.349  1.00  0.99           C  
ATOM     36  O   GLY A  10      -5.747 -12.539   4.458  1.00  1.31           O  
ATOM     37  N   LYS A  11      -6.264 -10.738   3.276  1.00  0.73           N  
ATOM     38  CA  LYS A  11      -5.474 -11.137   2.154  1.00  0.60           C  
ATOM     39  C   LYS A  11      -4.162 -10.431   2.180  1.00  0.51           C  
ATOM     40  O   LYS A  11      -4.073  -9.228   2.423  1.00  0.63           O  
ATOM     41  N   THR A  12      -3.086 -11.207   1.967  1.00  0.49           N  
ATOM     42  CA  THR A  12      -1.794 -10.594   1.954  1.00  0.48           C  
ATOM     43  C   THR A  12      -1.113 -10.719   0.634  1.00  0.52           C  
ATOM     44  O   THR A  12      -0.766 -11.830   0.233  1.00  0.72           O  
ATOM     45  N   ILE A  13      -0.895  -9.623  -0.113  1.00  0.48           N  
ATOM     46  CA  ILE A  13      -0.279  -9.668  -1.402  1.00  0.55           C  
ATOM     47  C   ILE A  13       1.178  -9.365  -1.332  1.00  0.51           C  
ATOM     48  O   ILE A  13       1.660  -8.436  -0.687  1.00  0.56           O  
ATOM     49  N   THR A  14       2.035 -10.127  -2.037  1.00  0.55           N  
ATOM     50  CA  THR A  14       3.446  -9.907  -2.103  1.00  0.54           C  
ATOM     51  C   THR A  14       3.747  -9.156  -3.353  1.00  0.55           C  
ATOM     52  O   THR A  14       3.268  -9.584  -4.403  1.00  0.72           O  
ATOM     53  N   LEU A  15       4.459  -8.018  -3.267  1.00  0.50           N  
ATOM     54  CA  LEU A  15       4.744  -7.080  -4.309  1.00  0.55           C  
ATOM     55  C   LEU A  15       6.199  -6.761  -4.311  1.00  0.52           C  
ATOM     56  O   LEU A  15       6.912  -6.521  -3.339  1.00  0.58           O  
ATOM     57  N   GLU A  16       6.827  -6.605  -5.490  1.00  0.59           N  
ATOM     58  CA  GLU A  16       8.161  -6.145  -5.720  1.00  0.63           C  
ATOM     59  C   GLU A  16       8.138  -4.693  -6.056  1.00  0.65           C  
ATOM     60  O   GLU A  16       7.594  -4.291  -7.082  1.00  0.81           O  
ATOM     61  N   VAL A  17       8.782  -3.824  -5.254  1.00  0.61           N  
ATOM     62  CA  VAL A  17       8.844  -2.412  -5.469  1.00  0.63           C  
ATOM     63  C   VAL A  17      10.272  -1.988  -5.522  1.00  0.65           C  
ATOM     64  O   VAL A  17      11.215  -2.750  -5.313  1.00  0.76           O  
ATOM     65  N   GLU A  18      10.466  -0.692  -5.826  1.00  0.68           N  
ATOM     66  CA  GLU A  18      11.666   0.000  -5.470  1.00  0.74           C  
ATOM     67  C   GLU A  18      11.284   1.073  -4.510  1.00  0.71           C  
ATOM     68  O   GLU A  18      10.230   1.663  -4.742  1.00  0.74           O  
ATOM     69  N   PRO A  19      12.093   1.455  -3.567  1.00  0.74           N  
ATOM     70  CA  PRO A  19      11.645   2.397  -2.584  1.00  0.74           C  
ATOM     71  C   PRO A  19      11.478   3.736  -3.216  1.00  0.70           C  
ATOM     72  O   PRO A  19      10.674   4.463  -2.632  1.00  0.74           O  
ATOM     73  N   SER A  20      12.042   4.064  -4.392  1.00  0.70           N  
ATOM     74  CA  SER A  20      11.866   5.266  -5.147  1.00  0.74           C  
ATOM     75  C   SER A  20      10.531   5.416  -5.793  1.00  0.71           C  
ATOM     76  O   SER A  20      10.185   6.468  -6.329  1.00  0.80           O  
ATOM     77  N   ASP A  21       9.616   4.433  -5.846  1.00  0.70           N  
ATOM     78  CA  ASP A  21       8.341   4.578  -6.476  1.00  0.73           C  
ATOM     79  C   ASP A  21       7.396   5.295  -5.575  1.00  0.64           C  
ATOM     80  O   ASP A  21       7.568   5.283  -4.357  1.00  0.66           O  
ATOM     81  N   THR A  22       6.256   5.746  -6.129  1.00  0.63           N  
ATOM     82  CA  THR A  22       5.285   6.502  -5.401  1.00  0.58           C  
ATOM     83  C   THR A  22       4.231   5.608  -4.844  1.00  0.53           C  
ATOM     84  O   THR A  22       3.931   4.542  -5.382  1.00  0.58           O  
ATOM     85  N   ILE A  23       3.609   6.004  -3.720  1.00  0.51           N  
ATOM     86  CA  ILE A  23       2.492   5.295  -3.178  1.00  0.48           C  
ATOM     87  C   ILE A  23       1.301   5.178  -4.067  1.00  0.48           C  
ATOM     88  O   ILE A  23       0.658   4.130  -4.068  1.00  0.51           O  
ATOM     89  N   GLU A  24       0.961   6.195  -4.879  1.00  0.50           N  
ATOM     90  CA  GLU A  24       0.090   6.120  -6.011  1.00  0.53           C  
ATOM     91  C   GLU A  24       0.306   4.948  -6.906  1.00  0.50           C  
ATOM     92  O   GLU A  24      -0.581   4.159  -7.229  1.00  0.55           O  
ATOM     93  N   ASN A  25       1.542   4.795  -7.413  1.00  0.51           N  
ATOM     94  CA  ASN A  25       2.056   3.730  -8.217  1.00  0.52           C  
ATOM     95  C   ASN A  25       2.005   2.425  -7.500  1.00  0.47           C  
ATOM     96  O   ASN A  25       1.516   1.525  -8.180  1.00  0.53           O  
ATOM     97  N   VAL A  26       2.285   2.315  -6.189  1.00  0.45           N  
ATOM     98  CA  VAL A  26       2.224   1.109  -5.424  1.00  0.44           C  
ATOM     99  C   VAL A  26       0.811   0.635  -5.421  1.00  0.40           C  
ATOM    100  O   VAL A  26       0.523  -0.509  -5.766  1.00  0.44           O  
ATOM    101  N   LYS A  27      -0.160   1.560  -5.328  1.00  0.40           N  
ATOM    102  CA  LYS A  27      -1.511   1.126  -5.510  1.00  0.41           C  
ATOM    103  C   LYS A  27      -1.963   0.739  -6.876  1.00  0.38           C  
ATOM    104  O   LYS A  27      -2.779  -0.165  -7.051  1.00  0.42           O  
ATOM    105  N   ALA A  28      -1.355   1.281  -7.945  1.00  0.39           N  
ATOM    106  CA  ALA A  28      -1.571   0.776  -9.265  1.00  0.39           C  
ATOM    107  C   ALA A  28      -0.989  -0.587  -9.420  1.00  0.36           C  
ATOM    108  O   ALA A  28      -1.425  -1.398 -10.236  1.00  0.42           O  
ATOM    109  N   LYS A  29       0.022  -0.951  -8.612  1.00  0.39           N  
ATOM    110  CA  LYS A  29       0.601  -2.256  -8.681  1.00  0.43           C  
ATOM    111  C   LYS A  29      -0.316  -3.316  -8.174  1.00  0.44           C  
ATOM    112  O   LYS A  29      -0.457  -4.334  -8.850  1.00  0.54           O  
ATOM    113  N   ILE A  30      -1.057  -2.950  -7.113  1.00  0.41           N  
ATOM    114  CA  ILE A  30      -2.186  -3.613  -6.537  1.00  0.44           C  
ATOM    115  C   ILE A  30      -3.261  -3.761  -7.556  1.00  0.45           C  
ATOM    116  O   ILE A  30      -4.058  -4.697  -7.560  1.00  0.56           O  
ATOM    117  N   GLN A  31      -3.413  -2.769  -8.452  1.00  0.41           N  
ATOM    118  CA  GLN A  31      -4.391  -2.791  -9.495  1.00  0.48           C  
ATOM    119  C   GLN A  31      -4.171  -3.864 -10.505  1.00  0.52           C  
ATOM    120  O   GLN A  31      -5.182  -4.475 -10.848  1.00  0.66           O  
ATOM    121  N   ASP A  32      -2.917  -4.084 -10.939  1.00  0.50           N  
ATOM    122  CA  ASP A  32      -2.542  -5.257 -11.665  1.00  0.60           C  
ATOM    123  C   ASP A  32      -2.679  -6.532 -10.907  1.00  0.65           C  
ATOM    124  O   ASP A  32      -2.962  -7.602 -11.441  1.00  0.81           O  
ATOM    125  N   LYS A  33      -2.478  -6.497  -9.577  1.00  0.62           N  
ATOM    126  CA  LYS A  33      -2.335  -7.722  -8.855  1.00  0.73           C  
ATOM    127  C   LYS A  33      -3.669  -8.221  -8.418  1.00  0.69           C  
ATOM    128  O   LYS A  33      -4.041  -9.299  -8.880  1.00  0.83           O  
ATOM    129  N   GLU A  34      -4.404  -7.541  -7.520  1.00  0.63           N  
ATOM    130  CA  GLU A  34      -5.583  -8.012  -6.862  1.00  0.67           C  
ATOM    131  C   GLU A  34      -6.807  -7.480  -7.522  1.00  0.69           C  
ATOM    132  O   GLU A  34      -7.884  -8.074  -7.488  1.00  0.95           O  
ATOM    133  N   GLY A  35      -6.655  -6.333  -8.210  1.00  0.63           N  
ATOM    134  CA  GLY A  35      -7.713  -5.851  -9.040  1.00  0.68           C  
ATOM    135  C   GLY A  35      -8.523  -4.821  -8.331  1.00  0.76           C  
ATOM    136  O   GLY A  35      -9.743  -4.691  -8.420  1.00  1.12           O  
ATOM    137  N   ILE A  36      -7.792  -3.918  -7.652  1.00  0.70           N  
ATOM    138  CA  ILE A  36      -8.494  -2.929  -6.895  1.00  0.76           C  
ATOM    139  C   ILE A  36      -8.075  -1.605  -7.435  1.00  0.71           C  
ATOM    140  O   ILE A  36      -6.874  -1.396  -7.597  1.00  0.73           O  
ATOM    141  N   PRO A  37      -8.890  -0.660  -7.798  1.00  0.75           N  
ATOM    142  CA  PRO A  37      -8.444   0.598  -8.324  1.00  0.79           C  
ATOM    143  C   PRO A  37      -7.833   1.410  -7.235  1.00  0.75           C  
ATOM    144  O   PRO A  37      -8.390   1.299  -6.143  1.00  0.75           O  
ATOM    145  N   PRO A  38      -6.894   2.271  -7.486  1.00  0.81           N  
ATOM    146  CA  PRO A  38      -6.187   2.966  -6.448  1.00  0.85           C  
ATOM    147  C   PRO A  38      -6.929   4.036  -5.726  1.00  0.89           C  
ATOM    148  O   PRO A  38      -6.526   4.571  -4.693  1.00  0.99           O  
ATOM    149  N   ASP A  39      -8.105   4.511  -6.175  1.00  0.96           N  
ATOM    150  CA  ASP A  39      -8.884   5.550  -5.576  1.00  1.11           C  
ATOM    151  C   ASP A  39      -9.638   4.897  -4.468  1.00  1.00           C  
ATOM    152  O   ASP A  39      -9.953   5.465  -3.424  1.00  1.14           O  
ATOM    153  N   GLN A  40      -9.971   3.613  -4.693  1.00  0.87           N  
ATOM    154  CA  GLN A  40     -10.723   2.846  -3.749  1.00  0.84           C  
ATOM    155  C   GLN A  40      -9.923   2.312  -2.612  1.00  0.67           C  
ATOM    156  O   GLN A  40     -10.448   1.611  -1.749  1.00  0.80           O  
ATOM    157  N   GLN A  41      -8.632   2.662  -2.466  1.00  0.56           N  
ATOM    158  CA  GLN A  41      -7.810   2.134  -1.421  1.00  0.51           C  
ATOM    159  C   GLN A  41      -6.743   3.062  -0.954  1.00  0.49           C  
ATOM    160  O   GLN A  41      -6.197   3.876  -1.698  1.00  0.65           O  
ATOM    161  N   ARG A  42      -6.364   3.031   0.337  1.00  0.47           N  
ATOM    162  CA  ARG A  42      -5.222   3.767   0.783  1.00  0.55           C  
ATOM    163  C   ARG A  42      -4.344   2.852   1.566  1.00  0.46           C  
ATOM    164  O   ARG A  42      -4.733   1.722   1.861  1.00  0.52           O  
ATOM    165  N   LEU A  43      -3.060   3.184   1.787  1.00  0.46           N  
ATOM    166  CA  LEU A  43      -2.181   2.306   2.497  1.00  0.42           C  
ATOM    167  C   LEU A  43      -1.662   2.993   3.713  1.00  0.43           C  
ATOM    168  O   LEU A  43      -1.346   4.182   3.734  1.00  0.55           O  
ATOM    169  N   ILE A  44      -1.423   2.134   4.720  1.00  0.42           N  
ATOM    170  CA  ILE A  44      -1.075   2.548   6.043  1.00  0.46           C  
ATOM    171  C   ILE A  44       0.169   1.842   6.461  1.00  0.42           C  
ATOM    172  O   ILE A  44       0.364   0.632   6.346  1.00  0.53           O  
ATOM    173  N   PHE A  45       1.109   2.679   6.932  1.00  0.42           N  
ATOM    174  CA  PHE A  45       2.249   2.072   7.545  1.00  0.46           C  
ATOM    175  C   PHE A  45       2.224   2.553   8.954  1.00  0.68           C  
ATOM    176  O   PHE A  45       2.051   3.736   9.243  1.00  1.50           O  
ATOM    177  N   ALA A  46       2.249   1.647   9.949  1.00  0.81           N  
ATOM    178  CA  ALA A  46       2.206   1.946  11.345  1.00  0.96           C  
ATOM    179  C   ALA A  46       0.819   2.233  11.809  1.00  0.97           C  
ATOM    180  O   ALA A  46       0.236   1.620  12.701  1.00  1.21           O  
ATOM    181  N   GLY A  47       0.142   3.190  11.151  1.00  0.99           N  
ATOM    182  CA  GLY A  47      -1.111   3.687  11.631  1.00  1.10           C  
ATOM    183  C   GLY A  47      -1.653   4.860  10.887  1.00  1.03           C  
ATOM    184  O   GLY A  47      -2.848   5.153  10.857  1.00  1.30           O  
ATOM    185  N   LYS A  48      -0.752   5.616  10.236  1.00  0.98           N  
ATOM    186  CA  LYS A  48      -1.086   6.777   9.472  1.00  1.05           C  
ATOM    187  C   LYS A  48      -1.173   6.364   8.043  1.00  0.84           C  
ATOM    188  O   LYS A  48      -0.285   5.657   7.570  1.00  0.81           O  
ATOM    189  N   GLN A  49      -2.156   6.936   7.326  1.00  0.84           N  
ATOM    190  CA  GLN A  49      -2.467   6.797   5.937  1.00  0.80           C  
ATOM    191  C   GLN A  49      -1.531   7.581   5.083  1.00  0.72           C  
ATOM    192  O   GLN A  49      -1.433   8.805   5.162  1.00  0.83           O  
ATOM    193  N   LEU A  50      -0.804   6.903   4.176  1.00  0.69           N  
ATOM    194  CA  LEU A  50       0.324   7.426   3.470  1.00  0.66           C  
ATOM    195  C   LEU A  50      -0.143   8.253   2.321  1.00  0.72           C  
ATOM    196  O   LEU A  50      -1.142   7.906   1.693  1.00  0.90           O  
ATOM    197  N   GLU A  51       0.596   9.334   2.014  1.00  0.70           N  
ATOM    198  CA  GLU A  51       0.419  10.231   0.915  1.00  0.76           C  
ATOM    199  C   GLU A  51       0.864   9.633  -0.374  1.00  0.77           C  
ATOM    200  O   GLU A  51       1.999   9.196  -0.561  1.00  1.23           O  
ATOM    201  N   ASP A  52      -0.109   9.578  -1.301  1.00  0.66           N  
ATOM    202  CA  ASP A  52      -0.034   8.903  -2.560  1.00  0.65           C  
ATOM    203  C   ASP A  52       0.984   9.503  -3.468  1.00  0.60           C  
ATOM    204  O   ASP A  52       1.712   8.825  -4.192  1.00  0.62           O  
ATOM    205  N   GLY A  53       1.204  10.819  -3.300  1.00  0.68           N  
ATOM    206  CA  GLY A  53       2.280  11.574  -3.865  1.00  0.73           C  
ATOM    207  C   GLY A  53       3.569  11.728  -3.135  1.00  0.72           C  
ATOM    208  O   GLY A  53       4.266  12.718  -3.348  1.00  0.97           O  
ATOM    209  N   ARG A  54       4.058  10.756  -2.343  1.00  0.64           N  
ATOM    210  CA  ARG A  54       5.387  10.685  -1.821  1.00  0.63           C  
ATOM    211  C   ARG A  54       5.739   9.269  -2.128  1.00  0.59           C  
ATOM    212  O   ARG A  54       4.912   8.527  -2.655  1.00  0.62           O  
ATOM    213  N   THR A  55       6.978   8.823  -1.853  1.00  0.63           N  
ATOM    214  CA  THR A  55       7.462   7.506  -2.128  1.00  0.61           C  
ATOM    215  C   THR A  55       7.622   6.747  -0.856  1.00  0.59           C  
ATOM    216  O   THR A  55       7.252   7.214   0.221  1.00  0.64           O  
ATOM    217  N   LEU A  56       7.979   5.454  -0.948  1.00  0.58           N  
ATOM    218  CA  LEU A  56       8.306   4.642   0.183  1.00  0.59           C  
ATOM    219  C   LEU A  56       9.568   5.002   0.889  1.00  0.64           C  
ATOM    220  O   LEU A  56       9.680   4.820   2.101  1.00  0.70           O  
ATOM    221  N   SER A  57      10.529   5.667   0.225  1.00  0.68           N  
ATOM    222  CA  SER A  57      11.803   6.109   0.702  1.00  0.75           C  
ATOM    223  C   SER A  57      11.659   7.148   1.761  1.00  0.76           C  
ATOM    224  O   SER A  57      12.328   7.142   2.793  1.00  0.84           O  
ATOM    225  N   ASP A  58      10.692   8.061   1.561  1.00  0.75           N  
ATOM    226  CA  ASP A  58      10.398   9.152   2.437  1.00  0.78           C  
ATOM    227  C   ASP A  58       9.773   8.774   3.736  1.00  0.77           C  
ATOM    228  O   ASP A  58       9.896   9.446   4.759  1.00  0.86           O  
ATOM    229  N   TYR A  59       9.134   7.595   3.833  1.00  0.72           N  
ATOM    230  CA  TYR A  59       8.520   7.023   4.991  1.00  0.73           C  
ATOM    231  C   TYR A  59       9.484   6.079   5.622  1.00  0.76           C  
ATOM    232  O   TYR A  59       9.133   5.444   6.616  1.00  0.89           O  
ATOM    233  N   ASN A  60      10.657   5.890   4.993  1.00  0.74           N  
ATOM    234  CA  ASN A  60      11.753   5.073   5.417  1.00  0.79           C  
ATOM    235  C   ASN A  60      11.378   3.641   5.592  1.00  0.75           C  
ATOM    236  O   ASN A  60      11.817   3.068   6.588  1.00  0.86           O  
ATOM    237  N   ILE A  61      10.559   3.211   4.615  1.00  0.67           N  
ATOM    238  CA  ILE A  61      10.007   1.894   4.543  1.00  0.65           C  
ATOM    239  C   ILE A  61      11.095   1.052   3.971  1.00  0.66           C  
ATOM    240  O   ILE A  61      11.793   1.324   2.995  1.00  0.75           O
[truncated: 2,822,979 more chars]
