# Supplementary material for: ENCORE: Software for Quantitative Ensemble Comparison
Source: PLoS Comput Biol. 2015 Oct 27;11(10):e1004415. doi: 10.1371/journal.pcbi.1004415 (PMC4624683; doi:10.1371/journal.pcbi.1004415)
Supplement: S1 Software — (GZ) [file pcbi.1004415.s001.gz › encore-master/examples/experimental_ubq_ensembles/filtered_reference.pdb]

ATOM      1  N   GLN A   2      49.535 -88.953   7.698  1.00  9.27           N  
ATOM      2  CA  GLN A   2      48.664 -88.733   6.544  1.00  9.07           C  
ATOM      3  C   GLN A   2      48.393 -87.246   6.365  1.00  8.72           C  
ATOM      4  O   GLN A   2      48.199 -86.506   7.332  1.00  8.22           O  
ATOM      5  N   ILE A   3      48.341 -86.833   5.097  1.00  5.87           N  
ATOM      6  CA  ILE A   3      48.049 -85.451   4.732  1.00  5.07           C  
ATOM      7  C   ILE A   3      46.970 -85.458   3.649  1.00  4.01           C  
ATOM      8  O   ILE A   3      46.704 -86.499   3.043  1.00  4.61           O  
ATOM      9  N   PHE A   4      46.357 -84.295   3.399  1.00  4.55           N  
ATOM     10  CA  PHE A   4      45.309 -84.192   2.372  1.00  4.68           C  
ATOM     11  C   PHE A   4      45.645 -83.115   1.344  1.00  5.30           C  
ATOM     12  O   PHE A   4      46.106 -82.039   1.695  1.00  5.58           O  
ATOM     13  N   VAL A   5      45.364 -83.405   0.069  1.00  4.44           N  
ATOM     14  CA  VAL A   5      45.588 -82.434  -1.009  1.00  3.87           C  
ATOM     15  C   VAL A   5      44.269 -82.204  -1.739  1.00  4.93           C  
ATOM     16  O   VAL A   5      43.664 -83.145  -2.246  1.00  6.84           O  
ATOM     17  N   LYS A   6      43.832 -80.949  -1.812  1.00  6.04           N  
ATOM     18  CA  LYS A   6      42.584 -80.617  -2.511  1.00  6.12           C  
ATOM     19  C   LYS A   6      42.882 -80.074  -3.908  1.00  6.57           C  
ATOM     20  O   LYS A   6      43.847 -79.336  -4.107  1.00  5.76           O  
ATOM     21  N   THR A   7      42.032 -80.446  -4.877  1.00  7.41           N  
ATOM     22  CA  THR A   7      42.196 -79.992  -6.258  1.00  7.48           C  
ATOM     23  C   THR A   7      41.223 -78.859  -6.583  1.00  8.75           C  
ATOM     24  O   THR A   7      40.265 -78.591  -5.857  1.00  8.58           O  
ATOM     25  N   LEU A   8      41.511 -78.222  -7.689  1.00  9.84           N  
ATOM     26  CA  LEU A   8      40.689 -77.107  -8.160  1.00 14.15           C  
ATOM     27  C   LEU A   8      39.276 -77.569  -8.502  1.00 17.37           C  
ATOM     28  O   LEU A   8      38.359 -76.752  -8.585  1.00 17.01           O  
ATOM     29  N   THR A   9      39.096 -78.876  -8.725  1.00 18.33           N  
ATOM     30  CA  THR A   9      37.774 -79.402  -9.085  1.00 19.24           C  
ATOM     31  C   THR A   9      36.991 -79.877  -7.863  1.00 19.48           C  
ATOM     32  O   THR A   9      35.844 -80.307  -7.984  1.00 23.14           O  
ATOM     33  N   GLY A  10      37.593 -79.754  -6.680  1.00 19.43           N  
ATOM     34  CA  GLY A  10      36.910 -80.128  -5.439  1.00 18.74           C  
ATOM     35  C   GLY A  10      37.210 -81.551  -4.979  1.00 17.62           C  
ATOM     36  O   GLY A  10      36.529 -82.088  -4.105  1.00 19.74           O  
ATOM     37  N   LYS A  11      38.239 -82.153  -5.570  1.00 13.56           N  
ATOM     38  CA  LYS A  11      38.609 -83.519  -5.191  1.00 11.91           C  
ATOM     39  C   LYS A  11      39.625 -83.480  -4.052  1.00 10.18           C  
ATOM     40  O   LYS A  11      40.476 -82.598  -4.027  1.00  9.10           O  
ATOM     41  N   THR A  12      39.562 -84.444  -3.126  1.00  9.63           N  
ATOM     42  CA  THR A  12      40.532 -84.487  -2.015  1.00  9.85           C  
ATOM     43  C   THR A  12      41.335 -85.787  -2.102  1.00 11.66           C  
ATOM     44  O   THR A  12      40.756 -86.871  -2.167  1.00 12.33           O  
ATOM     45  N   ILE A  13      42.669 -85.680  -2.080  1.00 10.42           N  
ATOM     46  CA  ILE A  13      43.535 -86.867  -2.134  1.00 11.84           C  
ATOM     47  C   ILE A  13      44.252 -87.049  -0.796  1.00 10.55           C  
ATOM     48  O   ILE A  13      44.726 -86.082  -0.206  1.00 11.92           O  
ATOM     49  N   THR A  14      44.351 -88.301  -0.337  1.00  9.39           N  
ATOM     50  CA  THR A  14      45.044 -88.600   0.920  1.00  9.63           C  
ATOM     51  C   THR A  14      46.395 -89.227   0.597  1.00 11.20           C  
ATOM     52  O   THR A  14      46.476 -90.137  -0.229  1.00 11.63           O  
ATOM     53  N   LEU A  15      47.460 -88.734   1.234  1.00  8.29           N  
ATOM     54  CA  LEU A  15      48.810 -89.256   0.981  1.00  9.03           C  
ATOM     55  C   LEU A  15      49.485 -89.650   2.288  1.00  8.59           C  
ATOM     56  O   LEU A  15      49.257 -89.025   3.322  1.00  7.79           O  
ATOM     57  N   GLU A  16      50.374 -90.644   2.224  1.00 11.04           N  
ATOM     58  CA  GLU A  16      51.140 -91.052   3.405  1.00 11.50           C  
ATOM     59  C   GLU A  16      52.520 -90.425   3.258  1.00 10.13           C  
ATOM     60  O   GLU A  16      53.202 -90.646   2.257  1.00  9.83           O  
ATOM     61  N   VAL A  17      52.923 -89.619   4.239  1.00  8.99           N  
ATOM     62  CA  VAL A  17      54.219 -88.941   4.178  1.00  8.85           C  
ATOM     63  C   VAL A  17      54.912 -88.921   5.532  1.00  8.04           C  
ATOM     64  O   VAL A  17      54.307 -89.185   6.570  1.00  8.99           O  
ATOM     65  N   GLU A  18      56.188 -88.548   5.494  1.00  7.29           N  
ATOM     66  CA  GLU A  18      57.003 -88.414   6.700  1.00  7.08           C  
ATOM     67  C   GLU A  18      57.445 -86.949   6.787  1.00  6.45           C  
ATOM     68  O   GLU A  18      57.570 -86.302   5.748  1.00  5.28           O  
ATOM     69  N   PRO A  19      57.677 -86.380   7.952  1.00  7.24           N  
ATOM     70  CA  PRO A  19      58.089 -84.957   8.021  1.00  7.07           C  
ATOM     71  C   PRO A  19      59.370 -84.676   7.239  1.00  6.65           C  
ATOM     72  O   PRO A  19      59.620 -83.540   6.830  1.00  6.37           O  
ATOM     73  N   SER A  20      60.187 -85.712   7.048  1.00  6.80           N  
ATOM     74  CA  SER A  20      61.451 -85.564   6.330  1.00  6.28           C  
ATOM     75  C   SER A  20      61.270 -85.685   4.821  1.00  8.45           C  
ATOM     76  O   SER A  20      62.234 -85.527   4.071  1.00  7.26           O  
ATOM     77  N   ASP A  21      60.047 -85.937   4.359  1.00  7.50           N  
ATOM     78  CA  ASP A  21      59.812 -86.033   2.925  1.00  7.70           C  
ATOM     79  C   ASP A  21      59.947 -84.642   2.335  1.00  7.08           C  
ATOM     80  O   ASP A  21      59.531 -83.638   2.928  1.00  8.11           O  
ATOM     81  N   THR A  22      60.512 -84.612   1.127  1.00  5.37           N  
ATOM     82  CA  THR A  22      60.687 -83.370   0.399  1.00  6.01           C  
ATOM     83  C   THR A  22      59.429 -83.053  -0.395  1.00  8.01           C  
ATOM     84  O   THR A  22      58.653 -83.940  -0.732  1.00  8.11           O  
ATOM     85  N   ILE A  23      59.257 -81.785  -0.712  1.00  8.32           N  
ATOM     86  CA  ILE A  23      58.114 -81.350  -1.506  1.00  9.92           C  
ATOM     87  C   ILE A  23      58.172 -82.016  -2.883  1.00 10.01           C  
ATOM     88  O   ILE A  23      57.149 -82.450  -3.407  1.00  8.71           O  
ATOM     89  N   GLU A  24      59.374 -82.123  -3.454  1.00  9.54           N  
ATOM     90  CA  GLU A  24      59.531 -82.781  -4.753  1.00 11.81           C  
ATOM     91  C   GLU A  24      59.048 -84.224  -4.633  1.00 11.14           C  
ATOM     92  O   GLU A  24      58.428 -84.756  -5.550  1.00 10.62           O  
ATOM     93  N   ASN A  25      59.337 -84.850  -3.496  1.00  9.43           N  
ATOM     94  CA  ASN A  25      58.911 -86.234  -3.292  1.00 10.96           C  
ATOM     95  C   ASN A  25      57.386 -86.285  -3.228  1.00  9.68           C  
ATOM     96  O   ASN A  25      56.766 -87.191  -3.779  1.00  9.33           O  
ATOM     97  N   VAL A  26      56.789 -85.296  -2.564  1.00  6.52           N  
ATOM     98  CA  VAL A  26      55.334 -85.235  -2.454  1.00  5.53           C  
ATOM     99  C   VAL A  26      54.715 -85.072  -3.843  1.00  4.42           C  
ATOM    100  O   VAL A  26      53.737 -85.746  -4.169  1.00  3.40           O  
ATOM    101  N   LYS A  27      55.293 -84.192  -4.675  1.00  2.64           N  
ATOM    102  CA  LYS A  27      54.785 -83.986  -6.028  1.00  4.14           C  
ATOM    103  C   LYS A  27      54.855 -85.302  -6.798  1.00  5.58           C  
ATOM    104  O   LYS A  27      53.959 -85.631  -7.568  1.00  4.11           O  
ATOM    105  N   ALA A  28      55.945 -86.037  -6.589  1.00  6.61           N  
ATOM    106  CA  ALA A  28      56.136 -87.305  -7.282  1.00  7.74           C  
ATOM    107  C   ALA A  28      55.038 -88.289  -6.898  1.00  9.17           C  
ATOM    108  O   ALA A  28      54.548 -89.043  -7.738  1.00 11.45           O  
ATOM    109  N   LYS A  29      54.641 -88.265  -5.635  1.00  8.96           N  
ATOM    110  CA  LYS A  29      53.581 -89.149  -5.169  1.00  7.90           C  
ATOM    111  C   LYS A  29      52.260 -88.775  -5.847  1.00  6.92           C  
ATOM    112  O   LYS A  29      51.498 -89.648  -6.252  1.00  6.87           O  
ATOM    113  N   ILE A  30      52.022 -87.464  -6.015  1.00  4.57           N  
ATOM    114  CA  ILE A  30      50.817 -86.979  -6.696  1.00  5.58           C  
ATOM    115  C   ILE A  30      50.844 -87.416  -8.164  1.00  7.26           C  
ATOM    116  O   ILE A  30      49.817 -87.804  -8.711  1.00  9.46           O  
ATOM    117  N   GLN A  31      52.013 -87.359  -8.797  1.00  7.06           N  
ATOM    118  CA  GLN A  31      52.134 -87.762 -10.201  1.00  8.67           C  
ATOM    119  C   GLN A  31      51.726 -89.222 -10.343  1.00 10.90           C  
ATOM    120  O   GLN A  31      51.015 -89.601 -11.275  1.00  9.63           O  
ATOM    121  N   ASP A  32      52.206 -90.025  -9.422  1.00 10.93           N  
ATOM    122  CA  ASP A  32      51.912 -91.448  -9.458  1.00 14.01           C  
ATOM    123  C   ASP A  32      50.406 -91.692  -9.363  1.00 14.04           C  
ATOM    124  O   ASP A  32      49.871 -92.587 -10.018  1.00 13.39           O  
ATOM    125  N   LYS A  33      49.738 -90.923  -8.508  1.00 14.22           N  
ATOM    126  CA  LYS A  33      48.301 -91.093  -8.288  1.00 14.00           C  
ATOM    127  C   LYS A  33      47.412 -90.414  -9.345  1.00 12.37           C  
ATOM    128  O   LYS A  33      46.358 -90.950  -9.687  1.00 12.17           O  
ATOM    129  N   GLU A  34      47.771 -89.202  -9.789  1.00 10.11           N  
ATOM    130  CA  GLU A  34      46.905 -88.441 -10.719  1.00 10.07           C  
ATOM    131  C   GLU A  34      47.431 -88.271 -12.154  1.00  9.32           C  
ATOM    132  O   GLU A  34      46.667 -87.933 -13.058  1.00 11.61           O  
ATOM    133  N   GLY A  35      48.715 -88.537 -12.367  1.00  7.22           N  
ATOM    134  CA  GLY A  35      49.293 -88.440 -13.713  1.00  6.29           C  
ATOM    135  C   GLY A  35      49.681 -87.007 -14.100  1.00  6.93           C  
ATOM    136  O   GLY A  35      49.981 -86.726 -15.260  1.00  7.41           O  
ATOM    137  N   ILE A  36      49.665 -86.114 -13.122  1.00  5.86           N  
ATOM    138  CA  ILE A  36      50.010 -84.710 -13.367  1.00  6.07           C  
ATOM    139  C   ILE A  36      51.535 -84.521 -13.253  1.00  6.36           C  
ATOM    140  O   ILE A  36      52.087 -84.732 -12.172  1.00  6.18           O  
ATOM    141  N   PRO A  37      52.243 -84.132 -14.303  1.00  8.65           N  
ATOM    142  CA  PRO A  37      53.724 -83.939 -14.205  1.00  9.18           C  
ATOM    143  C   PRO A  37      54.106 -82.886 -13.132  1.00  9.85           C  
ATOM    144  O   PRO A  37      53.488 -81.824 -13.067  1.00  8.51           O  
ATOM    145  N   PRO A  38      55.100 -83.157 -12.287  1.00  8.71           N  
ATOM    146  CA  PRO A  38      55.531 -82.201 -11.208  1.00  9.08           C  
ATOM    147  C   PRO A  38      55.765 -80.760 -11.691  1.00  9.28           C  
ATOM    148  O   PRO A  38      55.576 -79.822 -10.917  1.00  6.50           O  
ATOM    149  N   ASP A  39      56.197 -80.568 -12.927  1.00 11.20           N  
ATOM    150  CA  ASP A  39      56.465 -79.212 -13.411  1.00 14.96           C  
ATOM    151  C   ASP A  39      55.180 -78.412 -13.619  1.00 13.99           C  
ATOM    152  O   ASP A  39      55.223 -77.188 -13.739  1.00 13.75           O  
ATOM    153  N   GLN A  40      54.038 -79.098 -13.673  1.00 11.60           N  
ATOM    154  CA  GLN A  40      52.752 -78.419 -13.882  1.00 10.76           C  
ATOM    155  C   GLN A  40      51.991 -78.233 -12.572  1.00  8.01           C  
ATOM    156  O   GLN A  40      50.862 -77.743 -12.568  1.00  8.96           O  
ATOM    157  N   GLN A  41      52.594 -78.661 -11.469  1.00  6.52           N  
ATOM    158  CA  GLN A  41      51.939 -78.574 -10.158  1.00  3.87           C  
ATOM    159  C   GLN A  41      52.535 -77.506  -9.236  1.00  4.79           C  
ATOM    160  O   GLN A  41      53.752 -77.366  -9.117  1.00  6.34           O  
ATOM    161  N   ARG A  42      51.636 -76.809  -8.532  1.00  5.73           N  
ATOM    162  CA  ARG A  42      52.011 -75.798  -7.540  1.00  6.97           C  
ATOM    163  C   ARG A  42      51.319 -76.144  -6.222  1.00  7.15           C  
ATOM    164  O   ARG A  42      50.099 -76.285  -6.182  1.00  7.33           O  
ATOM    165  N   LEU A  43      52.089 -76.299  -5.146  1.00  4.65           N  
ATOM    166  CA  LEU A  43      51.524 -76.652  -3.836  1.00  3.51           C  
ATOM    167  C   LEU A  43      51.523 -75.449  -2.903  1.00  5.56           C  
ATOM    168  O   LEU A  43      52.533 -74.765  -2.740  1.00  4.19           O  
ATOM    169  N   ILE A  44      50.362 -75.202  -2.296  1.00  4.58           N  
ATOM    170  CA  ILE A  44      50.188 -74.080  -1.371  1.00  5.55           C  
ATOM    171  C   ILE A  44      49.705 -74.578  -0.009  1.00  5.46           C  
ATOM    172  O   ILE A  44      48.813 -75.422   0.082  1.00  6.04           O  
ATOM    173  N   PHE A  45      50.281 -74.002   1.043  1.00  6.75           N  
ATOM    174  CA  PHE A  45      49.893 -74.332   2.411  1.00  4.70           C  
ATOM    175  C   PHE A  45      49.853 -73.054   3.233  1.00  6.34           C  
ATOM    176  O   PHE A  45      50.819 -72.292   3.263  1.00  5.45           O  
ATOM    177  N   ALA A  46      48.731 -72.823   3.894  1.00  6.53           N  
ATOM    178  CA  ALA A  46      48.562 -71.635   4.714  1.00  7.15           C  
ATOM    179  C   ALA A  46      48.946 -70.368   3.948  1.00  9.00           C  
ATOM    180  O   ALA A  46      49.500 -69.428   4.518  1.00 11.15           O  
ATOM    181  N   GLY A  47      48.586 -70.332   2.662  1.00  9.35           N  
ATOM    182  CA  GLY A  47      48.834 -69.149   1.835  1.00 11.68           C  
ATOM    183  C   GLY A  47      50.252 -69.048   1.264  1.00 11.14           C  
ATOM    184  O   GLY A  47      50.554 -68.077   0.571  1.00 13.93           O  
ATOM    185  N   LYS A  48      51.133 -70.015   1.551  1.00 10.47           N  
ATOM    186  CA  LYS A  48      52.516 -69.949   1.042  1.00  8.82           C  
ATOM    187  C   LYS A  48      52.794 -71.045   0.009  1.00  7.68           C  
ATOM    188  O   LYS A  48      52.391 -72.193   0.187  1.00  6.47           O  
ATOM    189  N   GLN A  49      53.519 -70.684  -1.054  1.00  8.89           N  
ATOM    190  CA  GLN A  49      53.882 -71.653  -2.089  1.00  7.18           C  
ATOM    191  C   GLN A  49      55.067 -72.463  -1.568  1.00  8.23           C  
ATOM    192  O   GLN A  49      56.056 -71.897  -1.101  1.00  9.70           O  
ATOM    193  N   LEU A  50      54.959 -73.786  -1.629  1.00  6.51           N  
ATOM    194  CA  LEU A  50      56.025 -74.658  -1.137  1.00  7.41           C  
ATOM    195  C   LEU A  50      57.079 -74.922  -2.216  1.00  8.27           C  
ATOM    196  O   LEU A  50      56.748 -75.159  -3.378  1.00  8.34           O  
ATOM    197  N   GLU A  51      58.360 -74.861  -1.820  1.00  9.43           N  
ATOM    198  CA  GLU A  51      59.465 -75.080  -2.768  1.00 11.90           C  
ATOM    199  C   GLU A  51      59.890 -76.548  -2.824  1.00 11.49           C  
ATOM    200  O   GLU A  51      59.745 -77.291  -1.855  1.00  9.88           O  
ATOM    201  N   ASP A  52      60.377 -76.954  -4.001  1.00 12.71           N  
ATOM    202  CA  ASP A  52      60.780 -78.344  -4.229  1.00 16.56           C  
ATOM    203  C   ASP A  52      62.035 -78.757  -3.442  1.00 15.83           C  
ATOM    204  O   ASP A  52      62.278 -79.950  -3.256  1.00 17.21           O  
ATOM    205  N   GLY A  53      62.840 -77.796  -2.995  1.00 15.00           N  
ATOM    206  CA  GLY A  53      64.071 -78.118  -2.249  1.00 11.77           C  
ATOM    207  C   GLY A  53      63.871 -78.110  -0.725  1.00 11.10           C  
ATOM    208  O   GLY A  53      64.829 -78.307   0.022  1.00 11.25           O  
ATOM    209  N   ARG A  54      62.644 -77.895  -0.266  1.00  8.53           N  
ATOM    210  CA  ARG A  54      62.364 -77.882   1.187  1.00  9.05           C  
ATOM    211  C   ARG A  54      61.537 -79.111   1.608  1.00  8.96           C  
ATOM    212  O   ARG A  54      60.978 -79.811   0.762  1.00 11.60           O  
ATOM    213  N   THR A  55      61.465 -79.371   2.933  1.00  9.05           N  
ATOM    214  CA  THR A  55      60.698 -80.517   3.466  1.00  9.03           C  
ATOM    215  C   THR A  55      59.411 -80.070   4.164  1.00  8.15           C  
ATOM    216  O   THR A  55      59.220 -78.895   4.469  1.00  5.91           O  
ATOM    217  N   LEU A  56      58.545 -81.056   4.433  1.00  6.91           N  
ATOM    218  CA  LEU A  56      57.278 -80.797   5.131  1.00  8.29           C  
ATOM    219  C   LEU A  56      57.528 -80.200   6.516  1.00  8.05           C  
ATOM    220  O   LEU A  56      56.822 -79.280   6.928  1.00 10.17           O  
ATOM    221  N   SER A  57      58.509 -80.736   7.254  1.00  8.92           N  
ATOM    222  CA  SER A  57      58.765 -80.224   8.600  1.00  9.00           C  
ATOM    223  C   SER A  57      59.175 -78.754   8.582  1.00  9.44           C  
ATOM    224  O   SER A  57      58.907 -78.019   9.532  1.00 10.91           O  
ATOM    225  N   ASP A  58      59.824 -78.330   7.513  1.00  9.11           N  
ATOM    226  CA  ASP A  58      60.263 -76.942   7.410  1.00  7.91           C  
ATOM    227  C   ASP A  58      59.063 -75.999   7.430  1.00  9.12           C  
ATOM    228  O   ASP A  58      59.169 -74.856   7.874  1.00  8.61           O  
ATOM    229  N   TYR A  59      57.920 -76.487   6.943  1.00  7.97           N  
ATOM    230  CA  TYR A  59      56.693 -75.684   6.903  1.00  8.45           C  
ATOM    231  C   TYR A  59      55.758 -76.026   8.060  1.00 10.98           C  
ATOM    232  O   TYR A  59      54.587 -75.646   8.052  1.00 12.95           O  
ATOM    233  N   ASN A  60      56.276 -76.746   9.057  1.00 12.38           N  
ATOM    234  CA  ASN A  60      55.497 -77.145  10.224  1.00 13.94           C  
ATOM    235  C   ASN A  60      54.171 -77.792   9.834  1.00 14.16           C  
ATOM    236  O   ASN A  60      53.151 -77.573  10.487  1.00 14.26           O  
ATOM    237  N   ILE A  61      54.196 -78.618   8.791  1.00 11.08           N  
ATOM    238  CA  ILE A  61      52.985 -79.318   8.364  1.00 11.78           C  
ATOM    239  C   ILE A  61      52.816 -80.531   9.273  1.00 13.74           C  
ATOM    240  O   ILE A  61      53.717 -81.362   9.388  1.00 14.60           O  
ATOM    241  N   GLN A  62      51.672 -80.595   9.965  1.00 13.97           N  
ATOM    242  CA  GLN A  62      51.389 -81.666  10.927  1.00 15.52           C  
ATOM    243  C   GLN A  62      50.344 -82.649  10.400  1.00 13.94           C  
ATOM    244  O   GLN A  62      49.710 -82.418   9.371  1.00 12.15           O  
ATOM    245  N   LYS A  63      50.204 -83.763  11.116  1.00 11.73           N  
ATOM    246  CA  LYS A  63      49.257 -84.788  10.688  1.00 11.97           C  
ATOM    247  C   LYS A  63      47.872 -84.199  10.418  1.00 10.41           C  
ATOM    248  O   LYS A  63      47.407 -83.301  11.121  1.00  9.59           O  
ATOM    249  N   GLU A  64      47.241 -84.717   9.367  1.00 10.04           N  
ATOM    250  CA  GLU A  64      45.916 -84.274   8.932  1.00 10.94           C  
ATOM    251  C   GLU A  64      45.911 -82.843   8.407  1.00  9.74           C  
ATOM    252  O   GLU A  64      44.857 -82.210   8.344  1.00  9.42           O  
ATOM    253  N   SER A  65      47.058 -82.356   7.959  1.00  6.85           N  
ATOM    254  CA  SER A  65      47.140 -81.032   7.359  1.00  6.90           C  
ATOM    255  C   SER A  65      46.585 -81.121   5.945  1.00  4.72           C  
ATOM    256  O   SER A  65      46.707 -82.156   5.291  1.00  3.91           O  
ATOM    257  N   THR A  66      45.979 -80.029   5.464  1.00  4.48           N  
ATOM    258  CA  THR A  66      45.416 -79.990   4.115  1.00  3.80           C  
ATOM    259  C   THR A  66      46.216 -79.013   3.256  1.00  4.60           C  
ATOM    260  O   THR A  66      46.328 -77.830   3.577  1.00  5.33           O  
ATOM    261  N   LEU A  67      46.725 -79.515   2.135  1.00  4.17           N  
ATOM    262  CA  LEU A  67      47.467 -78.690   1.184  1.00  3.85           C  
ATOM    263  C   LEU A  67      46.563 -78.438  -0.009  1.00  3.80           C  
ATOM    264  O   LEU A  67      45.633 -79.201  -0.273  1.00  5.54           O  
ATOM    265  N   HIS A  68      46.852 -77.366  -0.742  1.00  2.94           N  
ATOM    266  CA  HIS A  68      46.079 -77.015  -1.927  1.00  4.17           C  
ATOM    267  C   HIS A  68      46.948 -77.193  -3.163  1.00  5.32           C  
ATOM    268  O   HIS A  68      48.104 -76.769  -3.185  1.00  7.70           O  
ATOM    269  N   LEU A  69      46.394 -77.828  -4.192  1.00  5.29           N  
ATOM    270  CA  LEU A  69      47.128 -78.067  -5.434  1.00  3.97           C  
ATOM    271  C   LEU A  69      46.601 -77.125  -6.508  1.00  5.07           C  
ATOM    272  O   LEU A  69      45.391 -77.010  -6.702  1.00  4.34           O  
ATOM    273  N   VAL A  70      47.522 -76.463  -7.228  1.00  4.29           N  
ATOM    274  CA  VAL A  70      47.197 -75.542  -8.311  1.00  6.26           C  
ATOM    275  C   VAL A  70      47.858 -76.069  -9.578  1.00  9.22           C  
ATOM    276  O   VAL A  70      48.944 -76.644  -9.539  1.00  9.36           O  
TER
