# Supplementary material for: ENCORE: Software for Quantitative Ensemble Comparison
Source: PLoS Comput Biol. 2015 Oct 27;11(10):e1004415. doi: 10.1371/journal.pcbi.1004415 (PMC4624683; doi:10.1371/journal.pcbi.1004415)
Supplement: S1 Software — (GZ) [file pcbi.1004415.s001.gz › encore-master/examples/experimental_ubq_ensembles/hes.log]

ln: creazione del collegamento simbolico "./encore" non riuscita: File già esistente
ln: creazione del collegamento simbolico "./MDAnalysis" non riuscita: File già esistente
Now running: ./similarity.py -v --topology filtered_reference.pdb --mode=hes --nensembles=6 --ensemble1-trajectory filtered_1XQQ.pdb --ensemble2-trajectory filtered_2K39.pdb --ensemble3-trajectory filtered_2KOX.pdb --ensemble4-trajectory filtered_2LJ5.pdb --ensemble5-trajectory filtered_2NR2.pdb --ensemble6-trajectory xray.dcd
/home/teo/.local/lib/python2.7/site-packages/ENCORE-0.7-py2.7-linux-x86_64.egg/encore//similarity.py
15-03-11 11:25:  Loading ensembles . . .
15-03-11 11:25:  Ensemble 1 Loaded.
    trajectories: filtered_1XQQ.pdb
    frame interval: 1
    number of frames: 128
    atoms selection: (name CA)
    number of atoms: 69

15-03-11 11:25:  Ensemble 2 Loaded.
    trajectories: filtered_2K39.pdb
    frame interval: 1
    number of frames: 116
    atoms selection: (name CA)
    number of atoms: 69

15-03-11 11:25:  Ensemble 3 Loaded.
    trajectories: filtered_2KOX.pdb
    frame interval: 1
    number of frames: 640
    atoms selection: (name CA)
    number of atoms: 69

15-03-11 11:25:  Ensemble 4 Loaded.
    trajectories: filtered_2LJ5.pdb
    frame interval: 1
    number of frames: 301
    atoms selection: (name CA)
    number of atoms: 69

15-03-11 11:25:  Ensemble 5 Loaded.
    trajectories: filtered_2NR2.pdb
    frame interval: 1
    number of frames: 144
    atoms selection: (name CA)
    number of atoms: 69

15-03-11 11:25:  Ensemble 6 Loaded.
    trajectories: xray.dcd
    frame interval: 1
    number of frames: 46
    atoms selection: (name CA)
    number of atoms: 69

15-03-11 11:25:  Done! 6 ensembles loaded.
15-03-11 11:25:  Performing least-square fit of each frame on the topology conformation.
15-03-11 11:25:  Similarity metric calculations will now begin. 6 values will be computed.
15-03-11 11:25:  8 core(s) will be used for parallel calculations.
15-03-11 11:25:  Chosen metric: Harmonic similarity
15-03-11 11:25:  WARNING: for optimal performance, the number of cores should be a factor of the number of similarity metric values.
15-03-11 11:25:      Covariance matrix estimator: Shrinkage
15-03-11 11:25:  Calculation complete.
# === Harmonic similarity ===
           ens.0      ens.1      ens.2      ens.3      ens.4      ens.5      
ens.0      0.000      155.550    55.332     71.990     83.361     533.979    
ens.1      155.550    0.000      140.382    133.459    193.393    1224.437   
ens.2      55.332     140.382    0.000      39.774     48.244     340.817    
ens.3      71.990     133.459    39.774     0.000      74.578     425.247    
ens.4      83.361     193.393    48.244     74.578     0.000      396.483    
ens.5      533.979    1224.437   340.817    425.247    396.483    0.000      
