# Supplementary material for: ENCORE: Software for Quantitative Ensemble Comparison
Source: PLoS Comput Biol. 2015 Oct 27;11(10):e1004415. doi: 10.1371/journal.pcbi.1004415 (PMC4624683; doi:10.1371/journal.pcbi.1004415)
Supplement: S1 Software — (GZ) [file pcbi.1004415.s001.gz › encore-master/examples/md_simulations_ensembles/ces.log]

ln: creazione del collegamento simbolico "./encore" non riuscita: File già esistente
ln: creazione del collegamento simbolico "./MDAnalysis" non riuscita: File già esistente
Now running: ./similarity.py --save-matrix=minusrmsd_pw.npz --superimpose --convergence=50 --maxiter=500 --preferences=-10.0 --np=3 --nensembles 3 --topology topology.pdb --mode=ces -v --lambda=0.9 --ensemble1-trajectory traj_c22-star.xtc --ensemble2-trajectory traj_c36.xtc --ensemble3-trajectory traj_ff99sb-ildn-star.xtc
/home/teo/.local/lib/python2.7/site-packages/ENCORE-0.7-py2.7-linux-x86_64.egg/encore//similarity.py
15-03-11 11:30:  Loading ensembles . . .
15-03-11 11:30:  Ensemble 1 Loaded.
    trajectories: traj_c22-star.xtc
    frame interval: 1
    number of frames: 251
    atoms selection: (name CA)
    number of atoms: 163

15-03-11 11:30:  Ensemble 2 Loaded.
    trajectories: traj_c36.xtc
    frame interval: 1
    number of frames: 251
    atoms selection: (name CA)
    number of atoms: 163

15-03-11 11:30:  Ensemble 3 Loaded.
    trajectories: traj_ff99sb-ildn-star.xtc
    frame interval: 1
    number of frames: 251
    atoms selection: (name CA)
    number of atoms: 163

15-03-11 11:30:  Done! 3 ensembles loaded.
15-03-11 11:30:  Performing least-square fit of each frame on the topology conformation.
15-03-11 11:30:  Similarity metric calculations will now begin. 3 values will be computed.
15-03-11 11:30:  3 core(s) will be used for parallel calculations.
15-03-11 11:30:  Chosen metric: Conformational clustering
15-03-11 11:30:      Similarity matrix: -RMSD matrix
15-03-11 11:30:          Perform pairwise alignment: True
15-03-11 11:30:          Mass-weighted alignment and RMSD: True
15-03-11 11:30:          Atoms subset for alignment: None
15-03-11 11:30:      Calculating similarity matrix . . .

[>................................................................................] 0%
[=>...............................................................................] 2%
[===>.............................................................................] 4%
[=====>...........................................................................] 6%
[======>..........................................................................] 8%
[========>........................................................................] 10%
[==========>......................................................................] 12%
[============>....................................................................] 15%
[=============>...................................................................] 17%
[===============>.................................................................] 19%
[=================>...............................................................] 21%
[===================>.............................................................] 23%
[====================>............................................................] 26%
[======================>..........................................................] 28%
[========================>........................................................] 30%
[==========================>......................................................] 32%
[===========================>.....................................................] 34%
[=============================>...................................................] 36%
[===============================>.................................................] 39%
[=================================>...............................................] 41%
[==================================>..............................................] 43%
[====================================>............................................] 45%
[======================================>..........................................] 47%
[=======================================>.........................................] 49%
[=========================================>.......................................] 52%
[===========================================>.....................................] 54%
[=============================================>...................................] 56%
[==============================================>..................................] 58%
[================================================>................................] 60%
[==================================================>..............................] 63%
[====================================================>............................] 65%
[=====================================================>...........................] 67%
[=======================================================>.........................] 69%
[=========================================================>.......................] 71%
[===========================================================>.....................] 73%
[============================================================>....................] 76%
[==============================================================>..................] 78%
[================================================================>................] 80%
[==================================================================>..............] 82%
[===================================================================>.............] 84%
[=====================================================================>...........] 87%
[=======================================================================>.........] 89%
[=========================================================================>.......] 91%
[==========================================================================>......] 93%
[============================================================================>....] 95%
[==============================================================================>..] 97%
[===============================================================================>.] 99%
[================================================================================>] 100%15-03-11 11:30:      Done!
15-03-11 11:30:      Similarity matrix will be saved in minusrmsd_pw.npz.
15-03-11 11:30:      Clustering algorithm: Affinity Propagation
15-03-11 11:30:          Preference values: -10.00
15-03-11 11:30:          Maximum iterations: 500
15-03-11 11:30:          Convergence: 50
15-03-11 11:30:          Damping: 0.90
15-03-11 11:30:          Apply noise to similarity matrix: True
15-03-11 11:30:  WARNING: for optimal performance, the number of cores should be a factor of the number of preference values.
15-03-11 11:30:      Starting affinity propagation runs . . .
15-03-11 11:30:  Preference -10.00: starting Affinity Propagation
15-03-11 11:30:  Preference -10.00: converged in 348 iterations
15-03-11 11:30:  
    Done!
15-03-11 11:30:  Calculation complete.
# ==== Preference value: -10.00 ===
           ens.0      ens.1      ens.2      
ens.0      0.000      0.585      0.485      
ens.1      0.585      0.000      0.549      
ens.2      0.485      0.549      0.000      
