# Supplementary material for: ENCORE: Software for Quantitative Ensemble Comparison
Source: PLoS Comput Biol. 2015 Oct 27;11(10):e1004415. doi: 10.1371/journal.pcbi.1004415 (PMC4624683; doi:10.1371/journal.pcbi.1004415)
Supplement: S1 Software — (GZ) [file pcbi.1004415.s001.gz › encore-master/examples/md_simulations_ensembles/dres.sh]

. ../set_environment.sh
ln -s $ENCORE_BUILD .
ln -s $MDANALYSIS_BUILD .

if [[ ! -e minusrmsd_pw.npz ]]; then
        echo "-RMSD Matrix file ( minusrmsd_pw.npz ) not found! Please run the clustering example first."
        exit
fi

# Trajectories containing the ensembles to be compared
trajs=(traj_c22-star.xtc  traj_c36.xtc  traj_ff99sb-ildn-star.xtc)

# number of ensembles
nensembles=3


cmdline="./similarity.py --mode=dres --superimpose --np=$NP --load-matrix=minusrmsd_pw.npz --change-matrix-sign --nensembles $nensembles --topology topology.pdb --use-density=resample --dim=2 --samples=10000 --nsteps=1000000 --ncycle=100 --neighborhood-cutoff=1.5 --spe-mode=vanilla -v"

# add the --ensemble*-trajectory options (--ensemble1-trajectory traj_c22-star.xtc --ensemble2-trajectory traj_c36.xtc etc.)
for i in $(seq 0 2); do
	cmdline=$cmdline" --ensemble$((i+1))-trajectory ${trajs[$i]}"
done

# Run ENCORE
echo "Now running: $cmdline"
echo  $ENCORE_BUILD/similarity.py
$PYTHON encore/similarity.py $cmdline 
