# Supplementary material for: ENCORE: Software for Quantitative Ensemble Comparison
Source: PLoS Comput Biol. 2015 Oct 27;11(10):e1004415. doi: 10.1371/journal.pcbi.1004415 (PMC4624683; doi:10.1371/journal.pcbi.1004415)
Supplement: S1 Software — (GZ) [file pcbi.1004415.s001.gz › encore-master/examples/md_simulations_ensembles/hes.log]

ln: creazione del collegamento simbolico "./encore" non riuscita: File già esistente
ln: creazione del collegamento simbolico "./MDAnalysis" non riuscita: File già esistente
Now running: ./similarity.py -v --topology topology.pdb --mode=hes --nensembles=3 --ensemble1-trajectory traj_c22-star.xtc --ensemble2-trajectory traj_c36.xtc --ensemble3-trajectory traj_ff99sb-ildn-star.xtc
/home/teo/.local/lib/python2.7/site-packages/ENCORE-0.7-py2.7-linux-x86_64.egg/encore//similarity.py
15-03-11 11:29:  Loading ensembles . . .
15-03-11 11:29:  Ensemble 1 Loaded.
    trajectories: traj_c22-star.xtc
    frame interval: 1
    number of frames: 251
    atoms selection: (name CA)
    number of atoms: 163

15-03-11 11:29:  Ensemble 2 Loaded.
    trajectories: traj_c36.xtc
    frame interval: 1
    number of frames: 251
    atoms selection: (name CA)
    number of atoms: 163

15-03-11 11:29:  Ensemble 3 Loaded.
    trajectories: traj_ff99sb-ildn-star.xtc
    frame interval: 1
    number of frames: 251
    atoms selection: (name CA)
    number of atoms: 163

15-03-11 11:29:  Done! 3 ensembles loaded.
15-03-11 11:29:  Performing least-square fit of each frame on the topology conformation.
15-03-11 11:29:  Similarity metric calculations will now begin. 3 values will be computed.
15-03-11 11:29:  8 core(s) will be used for parallel calculations.
15-03-11 11:29:  Chosen metric: Harmonic similarity
15-03-11 11:29:  WARNING: for optimal performance, the number of cores should be a factor of the number of similarity metric values.
15-03-11 11:29:      Covariance matrix estimator: Shrinkage
15-03-11 11:29:  Calculation complete.
# === Harmonic similarity ===
           ens.0      ens.1      ens.2      
ens.0      0.000      1808738.297 1212.250   
ens.1      1808738.297 0.000      2293906.883 
ens.2      1212.250   2293906.883 0.000      
