# Supplementary material for: ENCORE: Software for Quantitative Ensemble Comparison
Source: PLoS Comput Biol. 2015 Oct 27;11(10):e1004415. doi: 10.1371/journal.pcbi.1004415 (PMC4624683; doi:10.1371/journal.pcbi.1004415)
Supplement: S1 Software — (GZ) [file pcbi.1004415.s001.gz › encore-master/examples/md_simulations_ensembles/hes.sh]

. ../set_environment.sh
ln -s $ENCORE_BUILD .
ln -s $MDANALYSIS_BUILD .

# Trajectories containing the ensembles to be compared
trajs=(traj_c22-star.xtc  traj_c36.xtc  traj_ff99sb-ildn-star.xtc)

# number of ensembles
nensembles=3

# command line. Options:
# --topology: topology for the provided trajectories
# --mode=hes: harmonic ensemble similarity
# --nensembles: numbers of ensembles that will be used for calculation
cmdline="./similarity.py -v --topology topology.pdb --mode=hes --nensembles=$nensembles"

# add the --ensemble*-trajectory options (--ensemble1-trajectory traj_c22-star.xtc --ensemble2-trajectory traj_c36.xtc etc.)
for i in $(seq 0 2); do
	cmdline=$cmdline" --ensemble$((i+1))-trajectory ${trajs[$i]}"
done

echo "Now running: $cmdline"
echo  $ENCORE_BUILD/similarity.py
$PYTHON encore/similarity.py $cmdline 
