# Supplementary material for: ENCORE: Software for Quantitative Ensemble Comparison
Source: PLoS Comput Biol. 2015 Oct 27;11(10):e1004415. doi: 10.1371/journal.pcbi.1004415 (PMC4624683; doi:10.1371/journal.pcbi.1004415)
Supplement: S1 Software — (GZ) [file pcbi.1004415.s001.gz › encore-master/examples/md_simulations_ensembles/topology.pdb]

REMARK    GENERATED BY TRJCONV
TITLE     Protein in water t=   0.00000
REMARK    THIS IS A SIMULATION BOX
CRYST1   65.636   65.636   65.636  60.00  60.00  90.00 P 1           1
MODEL        1
ATOM      1  CA  VAL     2      60.310  28.410  27.500  1.00  0.00            
ATOM      2  CA  ASN     3      57.040  30.400  27.170  1.00  0.00            
ATOM      3  CA  PRO     4      56.730  33.360  29.490  1.00  0.00            
ATOM      4  CA  THR     5      53.540  34.780  30.780  1.00  0.00            
ATOM      5  CA  VAL     6      52.920  38.520  30.830  1.00  0.00            
ATOM      6  CA  PHE     7      50.120  40.530  32.140  1.00  0.00            
ATOM      7  CA  PHE     8      48.190  43.670  31.050  1.00  0.00            
ATOM      8  CA  ASP     9      46.170  45.820  33.440  1.00  0.00            
ATOM      9  CA  ILE    10      43.470  47.380  31.250  1.00  0.00            
ATOM     10  CA  ALA    11      41.720  50.650  32.040  1.00  0.00            
ATOM     11  CA  VAL    12      38.890  52.390  30.290  1.00  0.00            
ATOM     12  CA  ASP    13      39.290  56.130  30.380  1.00  0.00            
ATOM     13  CA  GLY    14      39.150  56.280  34.200  1.00  0.00            
ATOM     14  CA  GLU    15      38.140  52.840  35.280  1.00  0.00            
ATOM     15  CA  PRO    16      39.810  49.510  35.660  1.00  0.00            
ATOM     16  CA  LEU    17      38.510  46.650  33.570  1.00  0.00            
ATOM     17  CA  GLY    18      40.610  43.630  34.420  1.00  0.00            
ATOM     18  CA  ARG    19      43.880  41.900  34.060  1.00  0.00            
ATOM     19  CA  VAL    20      44.520  39.930  30.940  1.00  0.00            
ATOM     20  CA  SER    21      47.390  37.470  31.120  1.00  0.00            
ATOM     21  CA  PHE    22      48.980  36.070  28.030  1.00  0.00            
ATOM     22  CA  GLU    23      51.410  33.230  27.240  1.00  0.00            
ATOM     23  CA  LEU    24      54.110  34.180  24.710  1.00  0.00            
ATOM     24  CA  PHE    25      55.520  31.650  22.340  1.00  0.00            
ATOM     25  CA  ALA    26      59.240  32.290  23.020  1.00  0.00            
ATOM     26  CA  ASP    27      60.110  28.770  21.820  1.00  0.00            
ATOM     27  CA  LYS    28      58.390  29.000  18.450  1.00  0.00            
ATOM     28  CA  VAL    29      59.160  32.670  17.780  1.00  0.00            
ATOM     29  CA  PRO    30      61.730  34.040  20.200  1.00  0.00            
ATOM     30  CA  LYS    31      62.490  37.080  18.140  1.00  0.00            
ATOM     31  CA  THR    32      58.930  38.160  17.860  1.00  0.00            
ATOM     32  CA  ALA    33      58.000  37.240  21.440  1.00  0.00            
ATOM     33  CA  GLU    34      61.010  38.810  23.030  1.00  0.00            
ATOM     34  CA  ASN    35      60.080  42.030  21.340  1.00  0.00            
ATOM     35  CA  PHE    36      56.620  42.000  22.890  1.00  0.00            
ATOM     36  CA  ARG    37      58.020  40.840  26.200  1.00  0.00            
ATOM     37  CA  ALA    38      60.420  43.680  26.640  1.00  0.00            
ATOM     38  CA  LEU    39      57.840  46.230  25.690  1.00  0.00            
ATOM     39  CA  SER    40      55.340  44.700  28.060  1.00  0.00            
ATOM     40  CA  THR    41      58.070  44.910  30.760  1.00  0.00            
ATOM     41  CA  GLY    42      59.310  48.240  29.270  1.00  0.00            
ATOM     42  CA  GLU    43      62.990  47.590  30.160  1.00  0.00            
ATOM     43  CA  LYS    44      64.290  49.080  26.960  1.00  0.00            
ATOM     44  CA  GLY    45      63.340  52.620  27.810  1.00  0.00            
ATOM     45  CA  PHE    46      59.850  52.510  26.270  1.00  0.00            
ATOM     46  CA  GLY    47      56.970  50.140  26.230  1.00  0.00            
ATOM     47  CA  TYR    48      53.250  49.320  26.060  1.00  0.00            
ATOM     48  CA  LYS    49      52.460  51.020  29.400  1.00  0.00            
ATOM     49  CA  GLY    50      50.430  54.190  28.770  1.00  0.00            
ATOM     50  CA  SER    51      49.330  52.990  25.410  1.00  0.00            
ATOM     51  CA  CYS    52      45.970  52.320  23.810  1.00  0.00            
ATOM     52  CA  PHE    53      44.010  49.880  21.710  1.00  0.00            
ATOM     53  CA  HIS    54      43.830  51.880  18.560  1.00  0.00            
ATOM     54  CA  ARG    55      41.290  49.890  16.700  1.00  0.00            
ATOM     55  CA  ILE    56      38.750  47.390  17.930  1.00  0.00            
ATOM     56  CA  ILE    57      36.380  45.490  15.740  1.00  0.00            
ATOM     57  CA  PRO    58      34.100  43.130  17.680  1.00  0.00            
ATOM     58  CA  GLY    59      34.080  39.590  16.340  1.00  0.00            
ATOM     59  CA  PHE    60      37.320  40.110  14.480  1.00  0.00            
ATOM     60  CA  MET    61      40.200  41.650  16.430  1.00  0.00            
ATOM     61  CA  CYS    62      41.450  44.110  18.990  1.00  0.00            
ATOM     62  CA  GLN    63      44.470  46.030  17.780  1.00  0.00            
ATOM     63  CA  GLY    64      47.200  47.680  19.800  1.00  0.00            
ATOM     64  CA  GLY    65      50.850  48.490  19.970  1.00  0.00            
ATOM     65  CA  ASP    66      51.200  51.990  18.490  1.00  0.00            
ATOM     66  CA  PHE    67      52.890  53.950  21.300  1.00  0.00            
ATOM     67  CA  THR    68      54.290  56.710  19.210  1.00  0.00            
ATOM     68  CA  ARG    69      51.310  57.800  17.200  1.00  0.00            
ATOM     69  CA  HIS    70      48.360  56.030  18.880  1.00  0.00            
ATOM     70  CA  ASN    71      46.640  55.520  15.570  1.00  0.00            
ATOM     71  CA  GLY    72      48.050  52.360  14.170  1.00  0.00            
ATOM     72  CA  THR    73      50.700  53.970  11.960  1.00  0.00            
ATOM     73  CA  GLY    74      53.570  53.950  14.460  1.00  0.00            
ATOM     74  CA  GLY    75      55.180  51.580  16.980  1.00  0.00            
ATOM     75  CA  LYS    76      58.740  50.620  17.430  1.00  0.00            
ATOM     76  CA  SER    77      60.640  47.390  17.920  1.00  0.00            
ATOM     77  CA  ILE    78      63.420  46.730  20.340  1.00  0.00            
ATOM     78  CA  TYR    79      65.960  45.970  17.650  1.00  0.00            
ATOM     79  CA  GLY    80      66.020  49.060  15.480  1.00  0.00            
ATOM     80  CA  GLU    81      62.750  50.260  14.080  1.00  0.00            
ATOM     81  CA  LYS    82      61.230  47.070  12.700  1.00  0.00            
ATOM     82  CA  PHE    83      62.310  43.490  12.020  1.00  0.00            
ATOM     83  CA  GLU    84      61.380  40.560   9.820  1.00  0.00            
ATOM     84  CA  ASP    85      58.660  37.870   9.840  1.00  0.00            
ATOM     85  CA  GLU    86      59.230  34.800  11.940  1.00  0.00            
ATOM     86  CA  ASN    87      56.600  32.090  11.360  1.00  0.00            
ATOM     87  CA  PHE    88      53.530  31.780   9.030  1.00  0.00            
ATOM     88  CA  ILE    89      53.030  28.120   9.790  1.00  0.00            
ATOM     89  CA  LEU    90      51.240  29.010  13.030  1.00  0.00            
ATOM     90  CA  LYS    91      47.640  29.830  12.320  1.00  0.00            
ATOM     91  CA  HIS    92      44.950  31.960  13.930  1.00  0.00            
ATOM     92  CA  THR    93      43.040  29.090  15.290  1.00  0.00            
ATOM     93  CA  GLY    94      40.520  30.670  17.650  1.00  0.00            
ATOM     94  CA  PRO    95      39.550  33.260  20.150  1.00  0.00            
ATOM     95  CA  GLY    96      42.490  34.380  22.140  1.00  0.00            
ATOM     96  CA  ILE    97      45.260  34.380  19.520  1.00  0.00            
ATOM     97  CA  LEU    98      47.930  37.040  19.940  1.00  0.00            
ATOM     98  CA  SER    99      49.390  37.960  16.610  1.00  0.00            
ATOM     99  CA  MET   100      51.380  40.620  14.830  1.00  0.00            
ATOM    100  CA  ALA   101      50.330  43.580  12.750  1.00  0.00            
ATOM    101  CA  ASN   102      52.070  44.400   9.460  1.00  0.00            
ATOM    102  CA  ALA   103      52.190  47.210   6.970  1.00  0.00            
ATOM    103  CA  GLY   104      53.610  44.900   4.350  1.00  0.00            
ATOM    104  CA  PRO   105      56.320  42.280   4.290  1.00  0.00            
ATOM    105  CA  ASN   106      58.880  42.370   7.100  1.00  0.00            
ATOM    106  CA  THR   107      57.500  45.330   9.040  1.00  0.00            
ATOM    107  CA  ASN   108      57.110  44.090  12.580  1.00  0.00            
ATOM    108  CA  GLY   109      57.590  47.040  14.800  1.00  0.00            
ATOM    109  CA  SER   110      55.400  46.480  17.740  1.00  0.00            
ATOM    110  CA  GLN   111      51.800  46.530  16.600  1.00  0.00            
ATOM    111  CA  PHE   112      49.760  43.600  17.710  1.00  0.00            
ATOM    112  CA  PHE   113      46.290  42.220  17.700  1.00  0.00            
ATOM    113  CA  ILE   114      44.320  39.780  19.770  1.00  0.00            
ATOM    114  CA  CYS   115      41.920  37.770  17.640  1.00  0.00            
ATOM    115  CA  THR   116      38.550  37.470  19.330  1.00  0.00            
ATOM    116  CA  ALA   117      37.300  34.720  17.040  1.00  0.00            
ATOM    117  CA  LYS   118      38.870  32.350  14.590  1.00  0.00            
ATOM    118  CA  THR   119      40.310  34.570  11.870  1.00  0.00            
ATOM    119  CA  GLU   120      41.210  31.830   9.460  1.00  0.00            
ATOM    120  CA  TRP   121      41.730  34.290   6.630  1.00  0.00            
ATOM    121  CA  LEU   122      44.610  36.100   8.300  1.00  0.00            
ATOM    122  CA  ASP   123      46.620  32.890   8.160  1.00  0.00            
ATOM    123  CA  GLY   124      50.040  32.640   6.590  1.00  0.00            
ATOM    124  CA  LYS   125      50.600  36.360   6.720  1.00  0.00            
ATOM    125  CA  HIS   126      50.600  37.650  10.190  1.00  0.00            
ATOM    126  CA  VAL   127      53.020  36.320  12.820  1.00  0.00            
ATOM    127  CA  VAL   128      51.500  34.340  15.680  1.00  0.00            
ATOM    128  CA  PHE   129      53.300  34.830  18.960  1.00  0.00            
ATOM    129  CA  GLY   130      51.060  33.920  21.840  1.00  0.00            
ATOM    130  CA  LYS   131      47.720  33.180  23.490  1.00  0.00            
ATOM    131  CA  VAL   132      45.360  34.490  26.170  1.00  0.00            
ATOM    132  CA  LYS   133      45.800  32.220  29.130  1.00  0.00            
ATOM    133  CA  GLU   134      43.530  34.000  31.470  1.00  0.00            
ATOM    134  CA  GLY   135      41.220  37.000  31.480  1.00  0.00            
ATOM    135  CA  MET   136      39.370  35.690  28.510  1.00  0.00            
ATOM    136  CA  ASN   137      36.110  37.220  29.690  1.00  0.00            
ATOM    137  CA  ILE   138      37.950  40.500  30.190  1.00  0.00            
ATOM    138  CA  VAL   139      39.000  40.260  26.530  1.00  0.00            
ATOM    139  CA  GLU   140      35.570  39.250  25.330  1.00  0.00            
ATOM    140  CA  ALA   141      34.320  42.290  27.280  1.00  0.00            
ATOM    141  CA  MET   142      36.850  44.570  25.740  1.00  0.00            
ATOM    142  CA  GLU   143      35.640  44.210  22.230  1.00  0.00            
ATOM    143  CA  ARG   144      32.300  45.640  23.280  1.00  0.00            
ATOM    144  CA  PHE   145      33.970  49.060  23.440  1.00  0.00            
ATOM    145  CA  GLY   146      34.500  48.860  19.700  1.00  0.00            
ATOM    146  CA  SER   147      32.480  48.970  16.490  1.00  0.00            
ATOM    147  CA  ARG   148      32.290  47.670  12.920  1.00  0.00            
ATOM    148  CA  ASN   149      33.910  50.910  11.840  1.00  0.00            
ATOM    149  CA  GLY   150      36.720  50.040  14.150  1.00  0.00            
ATOM    150  CA  LYS   151      36.350  53.200  16.110  1.00  0.00            
ATOM    151  CA  THR   152      36.630  53.440  19.830  1.00  0.00            
ATOM    152  CA  SER   153      35.090  56.100  21.980  1.00  0.00            
ATOM    153  CA  LYS   154      36.120  55.310  25.520  1.00  0.00            
ATOM    154  CA  LYS   155      39.860  55.160  25.740  1.00  0.00            
ATOM    155  CA  ILE   156      41.110  51.630  26.370  1.00  0.00            
ATOM    156  CA  THR   157      44.470  52.070  28.060  1.00  0.00            
ATOM    157  CA  ILE   158      47.310  49.820  29.220  1.00  0.00            
ATOM    158  CA  ALA   159      47.890  51.200  32.640  1.00  0.00            
ATOM    159  CA  ASP   160      50.220  48.580  34.000  1.00  0.00            
ATOM    160  CA  CYS   161      51.830  45.520  32.540  1.00  0.00            
ATOM    161  CA  GLY   162      54.700  43.270  33.470  1.00  0.00            
ATOM    162  CA  GLN   163      56.020  39.790  33.240  1.00  0.00            
ATOM    163  CA  LEU   164      54.780  37.150  35.680  1.00  0.00            
TER
ENDMDL
