# Supplementary material for: ENCORE: Software for Quantitative Ensemble Comparison
Source: PLoS Comput Biol. 2015 Oct 27;11(10):e1004415. doi: 10.1371/journal.pcbi.1004415 (PMC4624683; doi:10.1371/journal.pcbi.1004415)
Supplement: S1 Software — (GZ) [file pcbi.1004415.s001.gz › encore-master/examples/md_trajectory_convergence/ces.log]

ln: creazione del collegamento simbolico "./encore" non riuscita: File già esistente
ln: creazione del collegamento simbolico "./MDAnalysis" non riuscita: File già esistente
Now running: ff99sb-ildn-star
/home/teo/.local/lib/python2.7/site-packages/ENCORE-0.7-py2.7-linux-x86_64.egg/encore//similarity.py
15-03-11 12:08:  Loading ensembles . . .
15-03-11 12:08:  Ensemble 1 Loaded.
    trajectories: traj_ff99sb-ildn-star.xtc
    frame interval: 1
    number of frames: 251
    atoms selection: (name CA)
    number of atoms: 163

15-03-11 12:08:  Done! 1 ensembles loaded.
15-03-11 12:08:  Performing least-square fit of each frame on the topology conformation.
15-03-11 12:08:  Similarity metric calculations will now begin. 1 values will be computed.
15-03-11 12:08:  3 core(s) will be used for parallel calculations.
15-03-11 12:08:  WARNING: the last window will be shorter than the prescribed window size (1 frames)
15-03-11 12:08:  Chosen metric: Conformational clustering
15-03-11 12:08:      Similarity matrix: -RMSD matrix
15-03-11 12:08:          Perform pairwise alignment: True
15-03-11 12:08:          Mass-weighted alignment and RMSD: True
15-03-11 12:08:          Atoms subset for alignment: None
15-03-11 12:08:      Calculating similarity matrix . . .

[>................................................................................] 0%
[===============>.................................................................] 18%
[==============================>..................................................] 38%
[==============================================>..................................] 57%
[=============================================================>...................] 77%
[=============================================================================>...] 96%
[================================================================================>] 100%15-03-11 12:08:      Done!
15-03-11 12:08:      Similarity matrix will be saved in minusrmsd_pw_ff99sb-ildn-star.npz.
15-03-11 12:08:      Clustering algorithm: Affinity Propagation
15-03-11 12:08:          Preference values: -2.00
15-03-11 12:08:          Maximum iterations: 500
15-03-11 12:08:          Convergence: 50
15-03-11 12:08:          Damping: 0.80
15-03-11 12:08:          Apply noise to similarity matrix: True
15-03-11 12:08:  WARNING: for optimal performance, the number of cores should be a factor of the number of preference values.
15-03-11 12:08:      Starting affinity propagation runs . . .
15-03-11 12:08:  Preference -2.00: starting Affinity Propagation
15-03-11 12:08:  Preference -2.00: converged in 68 iterations
15-03-11 12:08:  
    Done!
15-03-11 12:08:  Calculation complete.
=== convergence clustering, preference -2.0, increasing window ===
win.1	0.206
win.2	0.175
win.3	0.181
win.4	0.183
win.5	0.183
win.6	0.078
win.7	0.026
win.8	0.007
win.9	0.001
win.10	0.000
Now running: c22-star
/home/teo/.local/lib/python2.7/site-packages/ENCORE-0.7-py2.7-linux-x86_64.egg/encore//similarity.py
15-03-11 12:08:  Loading ensembles . . .
15-03-11 12:08:  Ensemble 1 Loaded.
    trajectories: traj_c22-star.xtc
    frame interval: 1
    number of frames: 251
    atoms selection: (name CA)
    number of atoms: 163

15-03-11 12:08:  Done! 1 ensembles loaded.
15-03-11 12:08:  Performing least-square fit of each frame on the topology conformation.
15-03-11 12:08:  Similarity metric calculations will now begin. 1 values will be computed.
15-03-11 12:08:  3 core(s) will be used for parallel calculations.
15-03-11 12:08:  WARNING: the last window will be shorter than the prescribed window size (1 frames)
15-03-11 12:08:  Chosen metric: Conformational clustering
15-03-11 12:08:      Similarity matrix: -RMSD matrix
15-03-11 12:08:          Perform pairwise alignment: True
15-03-11 12:08:          Mass-weighted alignment and RMSD: True
15-03-11 12:08:          Atoms subset for alignment: None
15-03-11 12:08:      Calculating similarity matrix . . .

[>................................................................................] 0%
[===============>.................................................................] 19%
[===============================>.................................................] 39%
[===============================================>.................................] 58%
[==============================================================>..................] 78%
[==============================================================================>..] 98%
[================================================================================>] 100%15-03-11 12:08:      Done!
15-03-11 12:08:      Similarity matrix will be saved in minusrmsd_pw_c22-star.npz.
15-03-11 12:08:      Clustering algorithm: Affinity Propagation
15-03-11 12:08:          Preference values: -2.00
15-03-11 12:08:          Maximum iterations: 500
15-03-11 12:08:          Convergence: 50
15-03-11 12:08:          Damping: 0.80
15-03-11 12:08:          Apply noise to similarity matrix: True
15-03-11 12:08:  WARNING: for optimal performance, the number of cores should be a factor of the number of preference values.
15-03-11 12:08:      Starting affinity propagation runs . . .
15-03-11 12:08:  Preference -2.00: starting Affinity Propagation
15-03-11 12:08:  Preference -2.00: converged in 71 iterations
15-03-11 12:08:  
    Done!
15-03-11 12:08:  Calculation complete.
=== convergence clustering, preference -2.0, increasing window ===
win.1	0.495
win.2	0.276
win.3	0.230
win.4	0.205
win.5	0.167
win.6	0.101
win.7	0.069
win.8	0.047
win.9	0.014
win.10	0.000
