# Supplementary material for: ENCORE: Software for Quantitative Ensemble Comparison
Source: PLoS Comput Biol. 2015 Oct 27;11(10):e1004415. doi: 10.1371/journal.pcbi.1004415 (PMC4624683; doi:10.1371/journal.pcbi.1004415)
Supplement: S1 Software — (GZ) [file pcbi.1004415.s001.gz › encore-master/examples/md_trajectory_convergence/dres.log]

ln: creazione del collegamento simbolico "./encore" non riuscita: File già esistente
ln: creazione del collegamento simbolico "./MDAnalysis" non riuscita: File già esistente
Now running: ff99sb-ildn-star
/home/teo/.local/lib/python2.7/site-packages/ENCORE-0.7-py2.7-linux-x86_64.egg/encore//similarity.py
15-03-11 12:08:  Loading ensembles . . .
15-03-11 12:08:  Ensemble 1 Loaded.
    trajectories: traj_ff99sb-ildn-star.xtc
    frame interval: 1
    number of frames: 251
    atoms selection: (name CA)
    number of atoms: 163

15-03-11 12:08:  Done! 1 ensembles loaded.
15-03-11 12:08:  Performing least-square fit of each frame on the topology conformation.
15-03-11 12:08:  Similarity metric calculations will now begin. 1 values will be computed.
15-03-11 12:08:  3 core(s) will be used for parallel calculations.
15-03-11 12:08:  WARNING: the last window will be shorter than the prescribed window size (1 frames)
15-03-11 12:08:  Chosen metric: Dimensionality reduction
15-03-11 12:08:      Similarity matrix: RMSD matrix
15-03-11 12:08:          Loading similarity matrix from: minusrmsd_pw_ff99sb-ildn-star.npz
15-03-11 12:08:          Done!
15-03-11 12:08:          host : Diagon-Alley
15-03-11 12:08:          user : teo
15-03-11 12:08:          date : 2015-03-11 12:08:30.835806
15-03-11 12:08:          topology file : topology.pdb
15-03-11 12:08:          number of frames : 251
15-03-11 12:08:          pairwise superimposition : True
15-03-11 12:08:          superimposition subset : (name CA)
15-03-11 12:08:          mass-weighted : True
15-03-11 12:08:          The matrix sign will be changed.
15-03-11 12:08:  Starting Stochastic Proximity Embedding
15-03-11 12:08:  Stochastic Proximity Embedding finished. Residual stress: 0.131
Calculation finished. - Residual stress: 0.131
15-03-11 12:08:  Calculation complete.
=== convergence dimred, dimension 2: increasing window ===
win.1	0.210
win.2	0.173
win.3	0.175
win.4	0.164
win.5	0.164
win.6	0.072
win.7	0.022
win.8	0.007
win.9	0.000
win.10	0.000
Now running: c22-star
/home/teo/.local/lib/python2.7/site-packages/ENCORE-0.7-py2.7-linux-x86_64.egg/encore//similarity.py
15-03-11 12:08:  Loading ensembles . . .
15-03-11 12:08:  Ensemble 1 Loaded.
    trajectories: traj_c22-star.xtc
    frame interval: 1
    number of frames: 251
    atoms selection: (name CA)
    number of atoms: 163

15-03-11 12:08:  Done! 1 ensembles loaded.
15-03-11 12:08:  Performing least-square fit of each frame on the topology conformation.
15-03-11 12:08:  Similarity metric calculations will now begin. 1 values will be computed.
15-03-11 12:08:  3 core(s) will be used for parallel calculations.
15-03-11 12:08:  WARNING: the last window will be shorter than the prescribed window size (1 frames)
15-03-11 12:08:  Chosen metric: Dimensionality reduction
15-03-11 12:08:      Similarity matrix: RMSD matrix
15-03-11 12:08:          Loading similarity matrix from: minusrmsd_pw_c22-star.npz
15-03-11 12:08:          Done!
15-03-11 12:08:          host : Diagon-Alley
15-03-11 12:08:          user : teo
15-03-11 12:08:          date : 2015-03-11 12:08:32.849990
15-03-11 12:08:          topology file : topology.pdb
15-03-11 12:08:          number of frames : 251
15-03-11 12:08:          pairwise superimposition : True
15-03-11 12:08:          superimposition subset : (name CA)
15-03-11 12:08:          mass-weighted : True
15-03-11 12:08:          The matrix sign will be changed.
15-03-11 12:08:  Starting Stochastic Proximity Embedding
15-03-11 12:08:  Stochastic Proximity Embedding finished. Residual stress: 0.101
Calculation finished. - Residual stress: 0.101
15-03-11 12:09:  Calculation complete.
=== convergence dimred, dimension 2: increasing window ===
win.1	0.502
win.2	0.295
win.3	0.232
win.4	0.195
win.5	0.138
win.6	0.092
win.7	0.046
win.8	0.023
win.9	0.005
win.10	0.000
