# Supplementary material for: ENCORE: Software for Quantitative Ensemble Comparison
Source: PLoS Comput Biol. 2015 Oct 27;11(10):e1004415. doi: 10.1371/journal.pcbi.1004415 (PMC4624683; doi:10.1371/journal.pcbi.1004415)
Supplement: S1 Software — (GZ) [file pcbi.1004415.s001.gz › encore-master/examples/set_environment.sh]

export MDANALYSIS_BUILD=/home/username/MDAnalysis-0.8.1/build/lib.linux-x86_64-2.6/MDAnalysis/
export ENCORE_BUILD="/home/teo/.local/lib/python2.7/site-packages/ENCORE-0.7-py2.7-linux-x86_64.egg/encore/"
export PYTHON=/usr/bin/python
export NP=3

export PYTHONPATH=$ENCORE_BUILD:$PYTHONPATH
