# Supplementary material for: ENCORE: Software for Quantitative Ensemble Comparison
Source: PLoS Comput Biol. 2015 Oct 27;11(10):e1004415. doi: 10.1371/journal.pcbi.1004415 (PMC4624683; doi:10.1371/journal.pcbi.1004415)
Supplement: S1 Software — (GZ) [file pcbi.1004415.s001.gz › encore-master/MANIFEST.in]

recursive-include docs * 
recursive-include src *c *h *pyx *pxd
include README INSTALL CHANGELOG LICENSE 
include ez_setup.py setup.py
