# Supplementary material for: ENCORE: Software for Quantitative Ensemble Comparison
Source: PLoS Comput Biol. 2015 Oct 27;11(10):e1004415. doi: 10.1371/journal.pcbi.1004415 (PMC4624683; doi:10.1371/journal.pcbi.1004415)
Supplement: S1 Software — (GZ) [file pcbi.1004415.s001.gz › encore-master/PKG-INFO]

Metadata-Version: 1.1
Name: ENCORE
Version: 0.7
Summary: A python package to calculate conformational distance measures between ensembles.
Home-page: https://github.com/wouterboomsma/encore
Author: Matteo Tiberti, Wouter Boomsma, Elena Papaleo, Kresten Lindorff-Larsen
License: GPL 2
Description: see README for mor details
        
Platform: Linux, OSX
Requires: MDAnalysis
Provides: encore
