# Supplementary material for: ENCORE: Software for Quantitative Ensemble Comparison
Source: PLoS Comput Biol. 2015 Oct 27;11(10):e1004415. doi: 10.1371/journal.pcbi.1004415 (PMC4624683; doi:10.1371/journal.pcbi.1004415)
Supplement: S1 Software — (GZ) [file pcbi.1004415.s001.gz › encore-master/setup.py]

#! /usr/bin/python
"""Setuptools-based setup script for ENCORE.

ENCORE requires:

	* A working python2.6 distribution or higher (2.X)
	* the MDAnalysis package ( http://https://code.google.com/p/mdanalysis/ )
	* a command-line C compiler (as gcc or clang)
	* a working Cython distribution

For a basic installation just type the command:

  python setup.py install --user
"""


from ez_setup import use_setuptools
use_setuptools()
from setuptools import setup, Extension
from distutils.ccompiler import new_compiler
from distutils.version import LooseVersion
#
#------------------------------------------------------------

import sys, os
import shutil
import tempfile

REQUIRED_MDANALYSIS = '0.8.1'
REQUIRED_MDANALYSIS = LooseVersion(REQUIRED_MDANALYSIS)

# Make sure I have the right Python version.
if sys.version_info[:2] < (2, 6):
    print "ENCORE requires Python 2.6 or better. Python %d.%d detected" % sys.version_info[:2]
    print "Please upgrade your version of Python."
    sys.exit(-1)

try:
    # Find out if MDAnalysis is installed
    import MDAnalysis
except ImportError:
    print "*** package 'MDAnalysis' not found ***"
    sys.exit(-1)
    
    # Check MDAnalysis version
if LooseVersion(MDAnalysis.__version__) < REQUIRED_MDANALYSIS:
    print "*** package 'MDAnalysis' was found, but supported version is >= 0.8.1 ***"
    sys.exit(-1)

import numpy

try:
    numpy_include = numpy.get_include()
except AttributeError:
    numpy_include = numpy.get_numpy_include()

include_dirs = [numpy_include]

# Handle cython modules
try:
    from Cython.Distutils import build_ext
    use_cython = True
    cmdclass = {'build_ext': build_ext}
except ImportError:
    use_cython = False
    cmdclass = {}

if __name__ == '__main__':
    RELEASE = "0.7"     

    if 'DEBUG_CFLAGS' in os.environ:
        extra_compile_args = '\
            -std=c99 -pedantic -Wall -Wcast-align -Wcast-qual -Wpointer-arith \
            -Wchar-subscripts -Winline -Wnested-externs -Wbad-function-cast \
            -Wunreachable-code -Werror'
        define_macros = [('DEBUG', '1')]
    else:
        extra_compile_args = ''
        define_macros = []

    with open("SUMMARY.txt") as summary:
        LONG_DESCRIPTION = summary.read()
    
    extensions = [Extension('cutils',['src/cutils/cutils.%s' % ("pyx" if use_cython else "c")],
                            include_dirs = include_dirs,
                            extra_compile_args = ["-O3", "-ffast-math"]),
                  Extension('clustering.affinityprop', ['src/clustering/affinityprop.%s' % ("pyx" if use_cython else "c"), "src/clustering/ap.c"],
                            include_dirs = include_dirs.extend(['src/clustering']),
                            libraries=["m"],
                            extra_compile_args=["-O3", "-ffast-math","-std=c99"]),
                  Extension('dimensionality_reduction.stochasticproxembed', 
                            ['src/dimensionality_reduction/stochasticproxembed.%s' % ("pyx" if use_cython else "c"), "src/dimensionality_reduction/spe.c"],
                            include_dirs = include_dirs.extend(['src/dimensional_reduction']),
                            libraries=["m"],
                            extra_compile_args=["-O3", "-ffast-math","-std=c99"])
		]
                  

    setup(name              = 'ENCORE',
          version           = RELEASE,
          description       = 'A module built ',
          author            = '*',
          author_email      = '',
          url               = 'http://somewhere.over.the.rain.bow/',
          requires          = ['MDAnalysis'],
          provides          = ['encore'],
          license           = 'GPL 2',
          packages          = [ 'encore',
				'encore.clustering',
				'encore.dimensionality_reduction' ],
          package_dir       = {'encore': 'encore'},
          ext_package       = 'encore',
          ext_modules       = extensions,
          long_description  = LONG_DESCRIPTION,
          cmdclass          = cmdclass,
	  include_dirs	    = include_dirs,
          zip_safe          = False
          )
