# Supplementary material for: ENCORE: Software for Quantitative Ensemble Comparison
Source: PLoS Comput Biol. 2015 Oct 27;11(10):e1004415. doi: 10.1371/journal.pcbi.1004415 (PMC4624683; doi:10.1371/journal.pcbi.1004415)
Supplement: S1 Software — (GZ) [file pcbi.1004415.s001.gz › encore-master/src/clustering/affinityprop.pyx]

#cython embedsignature=True
# affinitypop.pyx --- Cython wrapper for the affinity propagation C library
# Copyright (C) 2014 Wouter Boomsma, Matteo Tiberti
#
# This program is free software: you can redistribute it and/or modify
# it under the terms of the GNU General Public License as published by
# the Free Software Foundation, either version 3 of the License, or
# (at your option) any later version.

# This program is distributed in the hope that it will be useful,
# but WITHOUT ANY WARRANTY; without even the implied warranty of
# MERCHANTABILITY or FITNESS FOR A PARTICULAR PURPOSE.  See the
# GNU General Public License for more details.

# You should have received a copy of the GNU General Public License
# along with this program.  If not, see <http://www.gnu.org/licenses/>.

from encore.utils import TriangularMatrix
import logging
import numpy
cimport numpy
cimport caffinityprop
cimport cython

@cython.boundscheck(False)
@cython.wraparound(False)

cdef class AffinityPropagation:
    """ 
    Affinity propagation clustering algorithm. This class is a Cython wrapper around the Affinity propagation algorithm, which is implement as a C library (see ap.c). The implemented algorithm is described in the paper:
	
	Clustering by Passing Messages Between Data Points. [PDF] [BibTeX]
	Brendan J. Frey and Delbert Dueck, University of Toronto
	Science 315, 972–976, February 2007 

    """

    def run(self, s, preference, double lam, int max_iterations, int convergence, int noise=1):
        """
	Run the clustering algorithm. 

	**Arguments:**
	
	`s` : encore.utils.TriangularMatrix object
		Triangular matrix containing the similarity values for each pair of clustering elements. Notice that the current implementation does not allow for asymmetric values (i.e. similarity(a,b) is assumed to be equal to similarity(b,a))

	`preference` : numpy.array of floats or float
		Preference values, which the determine the number of clusters. If a single value is given, all the preference values are set to that. Otherwise, the list is used to set the preference values (one value per element, so the list must be of the same size as the number of elements)
	`lam` : float
		Floating point value that defines how much damping is applied to the solution at each iteration. Must be ]0,1]

	`max_iterations` : int 
		Maximum number of iterations

	`convergence` : int
		Number of iterations in which the cluster centers must remain the same in order to reach convergence

	`noise` : int
		Whether to apply noise to the input s matrix, such there are no equal values. 1 is for yes, 0 is for no. 
		

	**Returns:**
	
	`elements` : list of int or None
		List of cluster-assigned elements, which can be used by encore.utils.ClustersCollection to generate Cluster objects. See these classes for more details.

	"""
        cdef int cn = s.size
        cdef double cpreference = preference

        # Assign preference values to diagonal
        try:
            for i in xrange(s.size):
                s[i,i] = <double>preference[i]
        except:
            pass

        if type(preference) == float:
            for i in xrange(s.size):
                s[i,i] = <double>preference
        else:
            raise TypeError
        
        logging.info("Preference %3.2f: starting Affinity Propagation" % (preference))

        # Prepare input and ouput arrays
        cdef numpy.ndarray[numpy.float64_t,  ndim=1] matndarray = numpy.ascontiguousarray(s._elements, dtype=numpy.float64)
        cdef numpy.ndarray[long,   ndim=1] clusters   = numpy.zeros((s.size),dtype=long)
        
        # run C module Affinity Propagation
        iterations = caffinityprop.CAffinityPropagation( <double*>matndarray.data, cn, lam, max_iterations, convergence, noise, <long*>clusters.data)
        # Check results and return them
        if iterations > 0:
            centroids = numpy.unique(clusters)
            for i in centroids:
                if clusters[i] != i:
                    logging.info("Preference %3.2f: Clustering converged, but clusters were malformed. Increase the convergence limit." % (preference))
                    return None
            
            logging.info("Preference %3.2f: converged in %d iterations" % (preference, iterations))
            return clusters
        
        else:
            logging.info("Preference %3.2f: could not converge in %d iterations" % (preference, -iterations))
            return None

    def __call__(self, *args):
        results = self.run(*args)
        return results
