# Supplementary material for: ENCORE: Software for Quantitative Ensemble Comparison
Source: PLoS Comput Biol. 2015 Oct 27;11(10):e1004415. doi: 10.1371/journal.pcbi.1004415 (PMC4624683; doi:10.1371/journal.pcbi.1004415)
Supplement: S1 Software — (GZ) [file pcbi.1004415.s001.gz › encore-master/src/dimensionality_reduction/cstochasticproxembed.pxd]

# cstochasticproxembed.pxd --- pxd file for stochasticproxembed.pyx
# Copyright (C) 2014 Wouter Boomsma, Matteo Tiberti
#
# This program is free software: you can redistribute it and/or modify
# it under the terms of the GNU General Public License as published by
# the Free Software Foundation, either version 3 of the License, or
# (at your option) any later version.

# This program is distributed in the hope that it will be useful,
# but WITHOUT ANY WARRANTY; without even the implied warranty of
# MERCHANTABILITY or FITNESS FOR A PARTICULAR PURPOSE.  See the
# GNU General Public License for more details.

# You should have received a copy of the GNU General Public License
# along with this program.  If not, see <http://www.gnu.org/licenses/>.

cdef extern from *:
    ctypedef char const_char "const char"

cdef extern from "stdio.h":
    int printf(const_char *, ...)

cdef extern from "stdlib.h":
    ctypedef struct time_t:
        pass
    time_t time(time_t*)
    void*   malloc (size_t, size_t)
    void*   realloc (void*, size_t)
    void    srand(unsigned int)
    int     rand()

cdef extern from "math.h":
    double  sqrt(double)

cdef extern from "stochasticproxembed.h":
    ctypedef struct IVWrapper:
        pass
    ctypedef void* empty

    int trmIndex(int, int)
    double ed(double*, int, int, int)
    double stress(double, double, int, int)
    double neighbours_stress(double, double, int, int, double)
    int neighbours(double, int, double, int*, int*, int*)
    int* nearest_neighbours(double*, int, int)
    int cmp_ivwrapper(void*,void*)
    double CkNeighboursStochasticProximityEmbedding(double*, double*, double, int, int, int, double, double, int, int)
    double CStochasticProximityEmbedding(double*, double*, double, int, int, double, double, int, int, int)
    double CkNNStochasticProximityEmbedding(double*, double*, int, int, int, double, double, int, int, int)
