# Supplementary material for: ENCORE: Software for Quantitative Ensemble Comparison
Source: PLoS Comput Biol. 2015 Oct 27;11(10):e1004415. doi: 10.1371/journal.pcbi.1004415 (PMC4624683; doi:10.1371/journal.pcbi.1004415)
Supplement: S1 Software — (GZ) [file pcbi.1004415.s001.gz › encore-master/src/dimensionality_reduction/spe.h]

/*
spe.h --- header file for spe.c
Copyright (C) 2014 Wouter Boomsma, Matteo Tiberti

This program is free software: you can redistribute it and/or modify
it under the terms of the GNU General Public License as published by
the Free Software Foundation, either version 3 of the License, or
(at your option) any later version.

This program is distributed in the hope that it will be useful,
but WITHOUT ANY WARRANTY; without even the implied warranty of
MERCHANTABILITY or FITNESS FOR A PARTICULAR PURPOSE.  See the
GNU General Public License for more details.

You should have received a copy of the GNU General Public License
along with this program.  If not, see <http://www.gnu.org/licenses/>.
*/

int trmIndex(int, int);

double ed(double*, int, int, int);

double stress(double, double, int, int);

double neighbours_stress(double, double, int, int, double);

int neighbours(double, int, double, int*, int*, int*);

int cmp_ivwrapper(const void*, const void*);

int nearest_neighbours(double*, int, int);

double CkNNStochasticProximityEmbedding(
        double*,
        double*,
        int,
        int,
        int,
        double,
        double,
        int,
        int,
        int); 

double CkNeighboursStochasticProximityEmbedding(
	double*,
        double*,
        double,
        int,
        int,
        int,
        double,
        double,
        int,
        int);

double CStochasticProximityEmbedding(
        double*,
        double*,
        double,
        int,
        int,
        double,
        double,
        int,
        int,
        int);
