# Supplementary material for: ENCORE: Software for Quantitative Ensemble Comparison
Source: PLoS Comput Biol. 2015 Oct 27;11(10):e1004415. doi: 10.1371/journal.pcbi.1004415 (PMC4624683; doi:10.1371/journal.pcbi.1004415)
Supplement: S1 Software — (GZ) [file pcbi.1004415.s001.gz › encore-master/src/dimensionality_reduction/stochasticproxembed.h]

int trmIndex(int, int);

double ed(double*, int, int, int);

double stress(double, double, int, int);

int neighbours(double, int, double, int*, int*, int*);

int cmp_ivwrapper(const void*, const void*);

int nearest_neighbours(double*, int, int);

double CkNNStochasticProximityEmbedding(
        double*,
        double*,
        int,
        int,
        int,
        double,
        double,
        int,
        int,
        int);

double CkNeighboursStochasticProximityEmbedding(
	double*,
        double*,
        double,
        int,
        int,
        int,
        double,
        double,
        int,
        int);

double CStochasticProximityEmbedding(
        double*,
        double*,
        double,
        int,
        int,
        double,
        double,
        int,
        int,
        int);
