# Supplementary material for: ENCORE: Software for Quantitative Ensemble Comparison
Source: PLoS Comput Biol. 2015 Oct 27;11(10):e1004415. doi: 10.1371/journal.pcbi.1004415 (PMC4624683; doi:10.1371/journal.pcbi.1004415)
Supplement: S1 Software — (GZ) [file pcbi.1004415.s001.gz › encore-master/SUMMARY.txt]

ENCORE is a Python package designed to quantify the similarity between
conformational ensembles of proteins (or in principle other
macromolecules), using three different methods originally described
in:

   Lindorff-Larsen K, Ferkinghoff-Borg J (2009)
   Similarity Measures for Protein Ensembles.
   PLoS ONE 4(1): e4203. doi:10.1371/journal.pone.0004203

A description of ENCORE and a number of application can be found in:

   Matteo Tiberti, Elena Papaleo, Tone Bengtsen, Wouter Boomsma and
   Kresten Lindorff-Larsen,
   ENCORE: Software for quantitative ensemble comparison
   Submitted

Please look at the README file for more details
